# Supplementary material for: Characteristics that modify the effect of small-quantity lipid-based nutrient supplementation on child anemia and micronutrient status: an individual participant data meta-analysis of randomized controlled trials
Source: bioRxiv or medRxiv preprint supplement (doi:10.1101/2021.02.08.21251234), 2021-02-10

Supplemental Figure 1: Summary risk of bias as a percentage of all included studies for the effects of SQ-LNS on biochemical outcomes

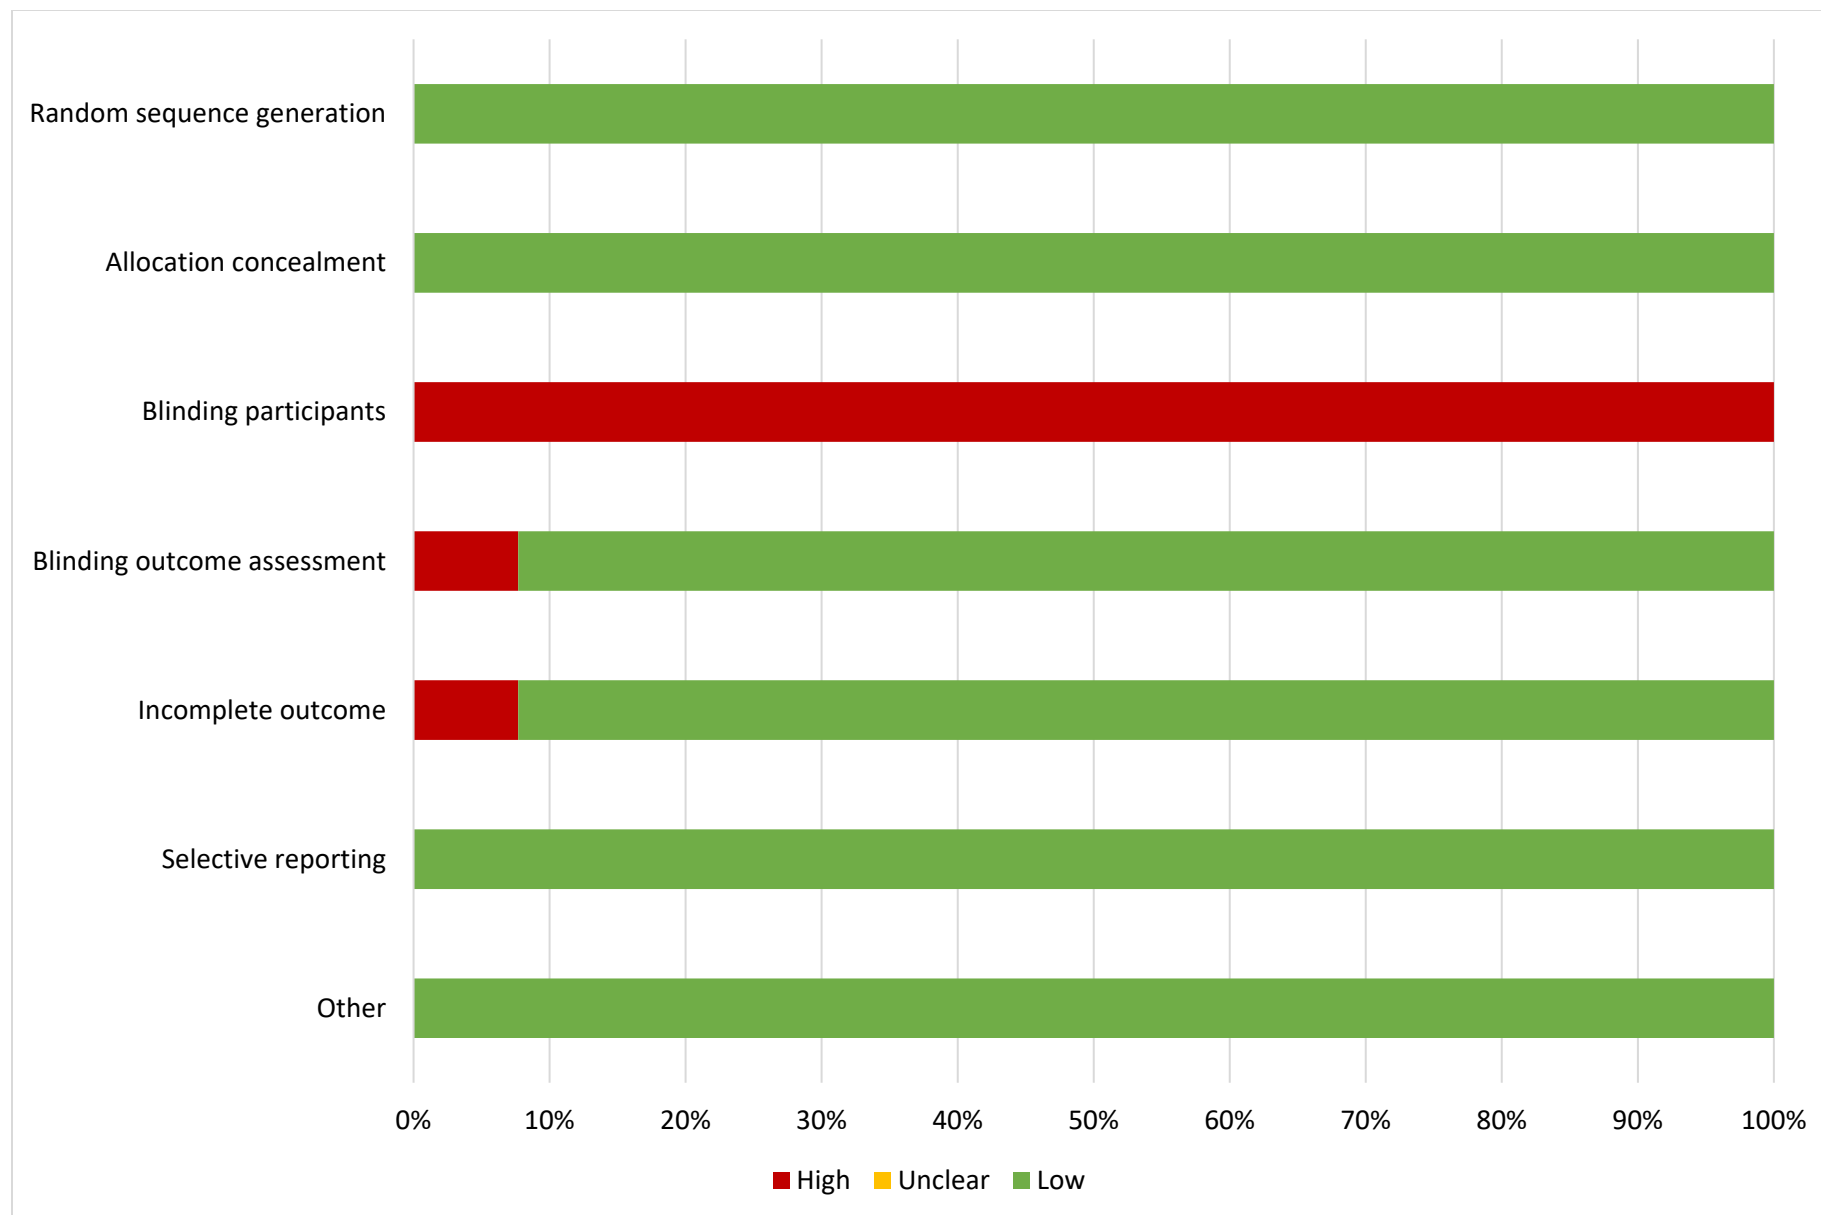

## Supplemental figure 2: Sensitivity analyses of main effects of SQ-LNS on biochemical outcomes

### Contents

|                                                                                                                                                                           |          |
|---------------------------------------------------------------------------------------------------------------------------------------------------------------------------|----------|
| <b>Supplemental figure 2A: Mean differences in hemoglobin concentration</b>                                                                                               | <b>2</b> |
| <b>Supplemental figure 2B: Geometric mean ratios for log transformed continuous outcomes</b>                                                                              | <b>3</b> |
| Supplemental figure 2B1: Geometric mean ratios for ferritin, sTfR, and ZPP . . . . .                                                                                      | 3        |
| Supplemental figure 2B2: Geometric mean ratios for plasma zinc, retinol, and RBP . . . . .                                                                                | 4        |
| <b>Supplemental figure 2C: Prevalence ratios for dichotomous outcomes</b>                                                                                                 | <b>5</b> |
| Supplemental figure 2C1: Prevalence ratios for anemia, moderate-to-severe anemia, iron deficiency, iron deficiency anemia, elevated sTfR, and elevated ZPP . . . . .      | 5        |
| Supplemental figure 2C2: Prevalence ratios for low and marginal vitamin A status . . . . .                                                                                | 6        |
| <b>Supplemental figure 2D: Prevalence differences for dichotomous outcomes</b>                                                                                            | <b>7</b> |
| Supplemental figure 2D1: Prevalence differences for anemia, moderate-to-severe anemia, iron deficiency, iron deficiency anemia, elevated sTfR, and elevated ZPP . . . . . | 7        |
| Supplemental figure 2D2: Prevalence ratios for low and marginal vitamin A status . . . . .                                                                                | 8        |

These figures show the pooled estimates of intervention effects by different pooling methods and different sensitivity analyses. For continuous outcomes, the intervention effect is measured by the difference in mean of the LNS group minus control. For log transformed continuous outcomes, the intervention effect is measured by the ratio of geometric means, the effect estimate is the geometric mean in the LNS group divided by the geometric mean in the control group. For dichotomous outcomes analyzed via prevalence ratios, the effect estimate is the prevalence in the LNS group divided by the prevalence in the control group. For dichotomous outcomes analyzed via prevalence differences, the effect estimate is the prevalence in the LNS group minus the prevalence in the control group.

The labels on the left y-axis indicate which outcome is assessed. The different columns correspond to sensitivity analyses in which intervention group categorization differs. All-trial analysis includes all trials; Child-LNS-only excludes trial arms that provided both maternal and child LNS; Multi-component analysis separates comparisons within trials that included multi-component interventions, so that the SQ-LNS vs. no SQ-LNS comparisons were conducted separately between pairs of arms that included the same non-nutrition components (e.g. SQ-LNS+WASH vs. WASH; SQ-LNS vs. Control); Passive arms excluded analysis excludes passive control arms. Depending on the sensitivity analysis, there may not have been enough comparisons available to generate a pooled estimate.

sTfR, soluble transferrin receptor; ZPP, zinc protoporphyrin; RBP, retinol binding protein.

### Supplemental figure 2A: Mean differences in hemoglobin concentration

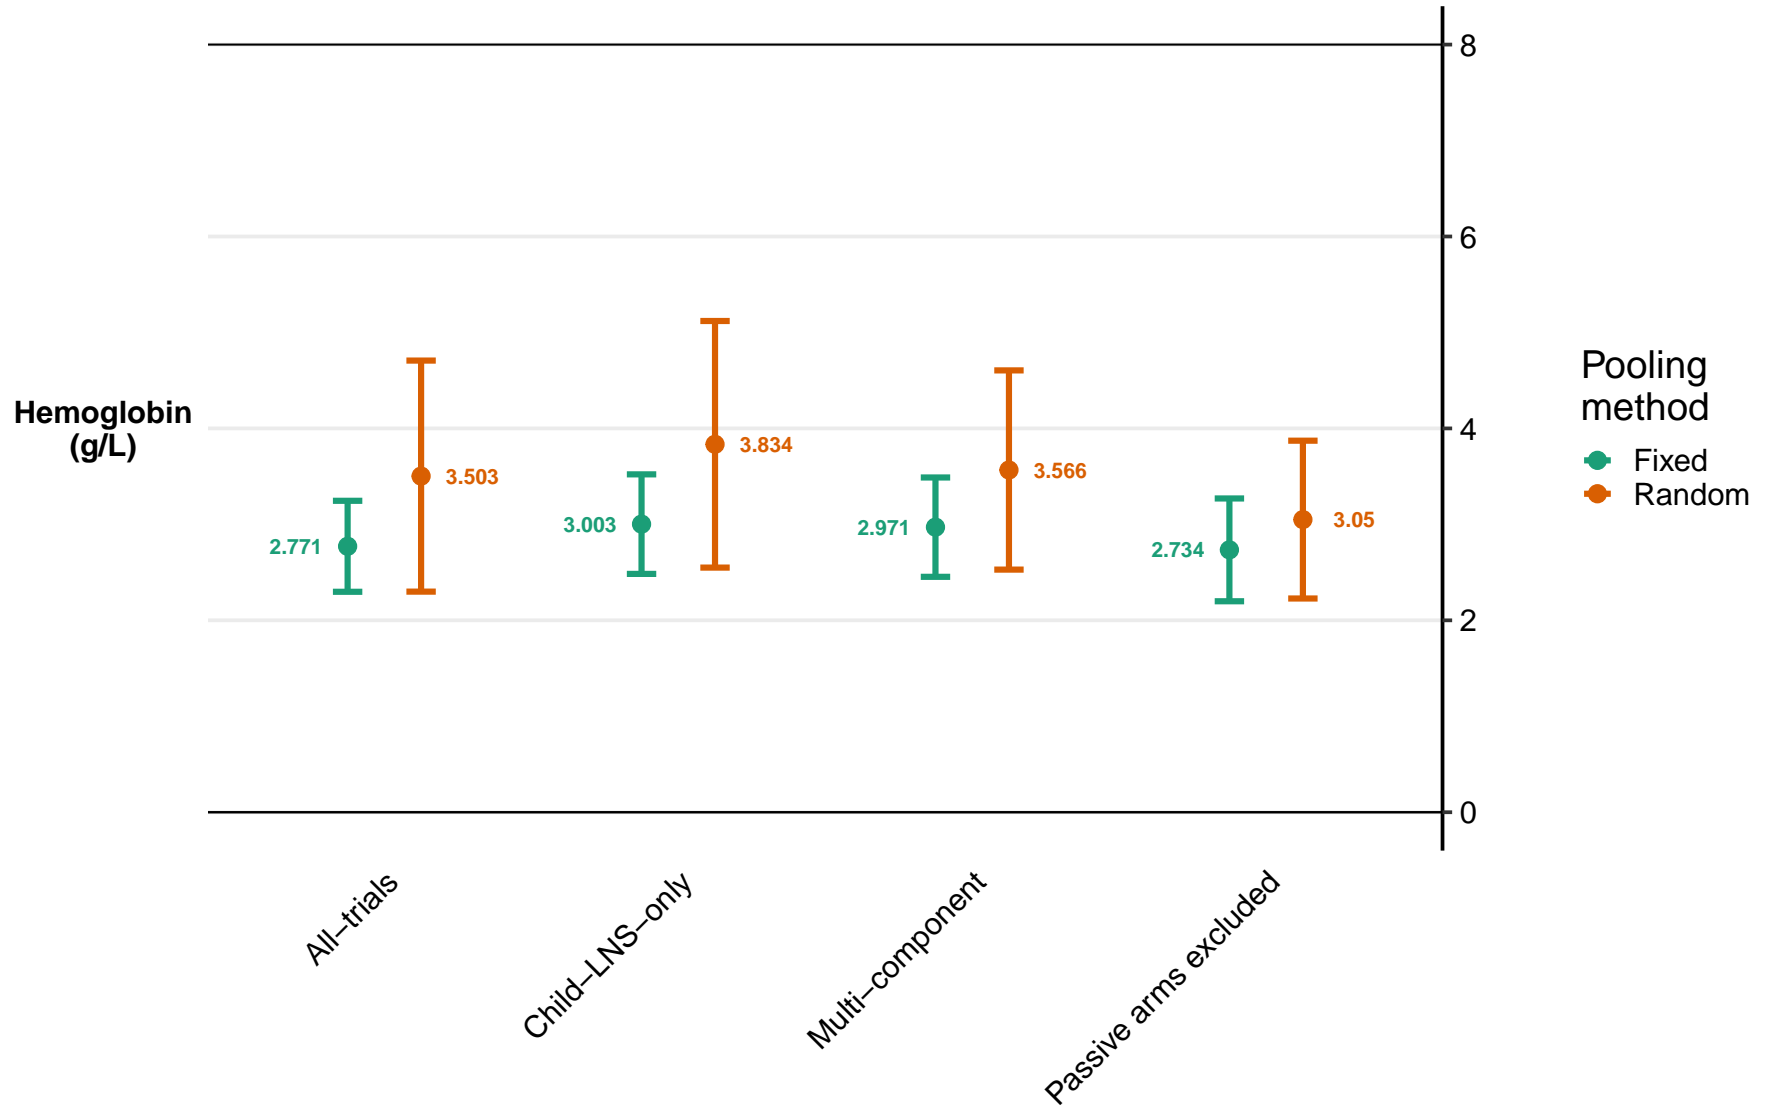

Supplemental figure 2B: Geometric mean ratios for log transformed continuous outcomes

Supplemental figure 2B1: Geometric mean ratios for ferritin, sTfR, and ZPP

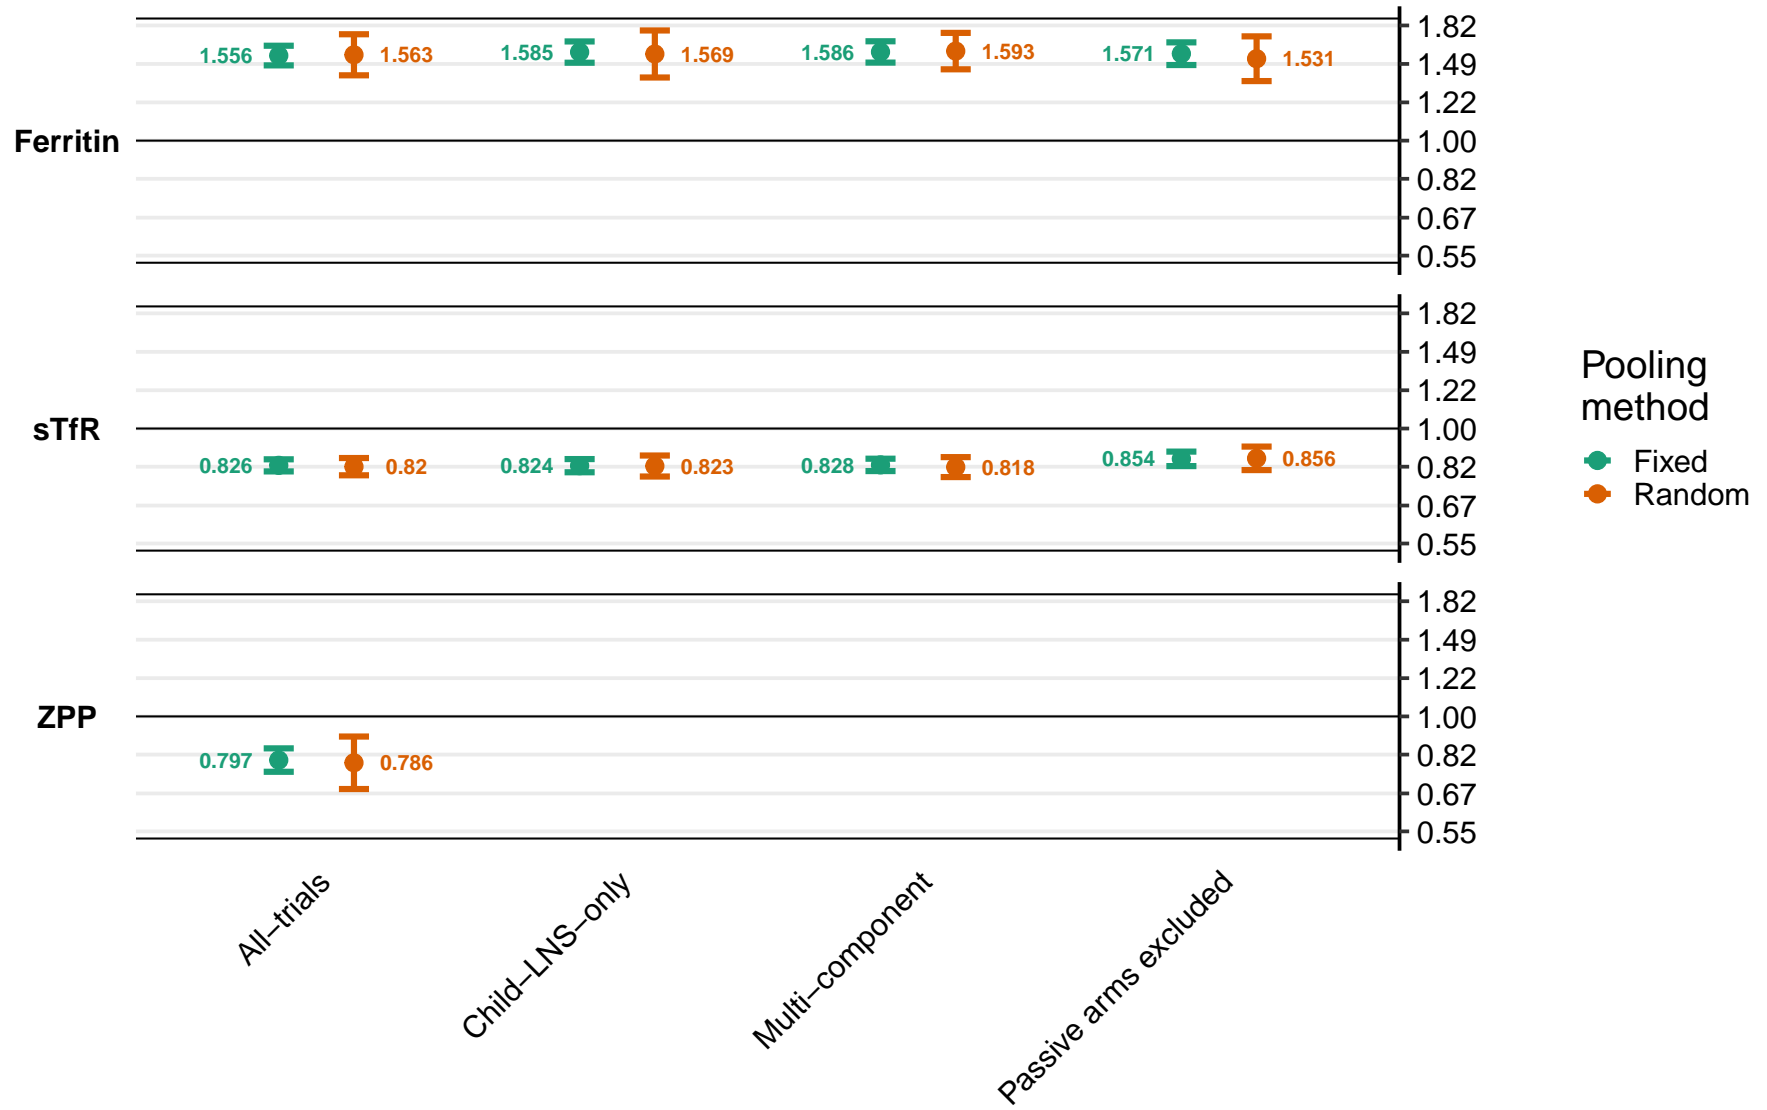

Supplemental figure 2B2: Geometric mean ratios for plasma zinc, retinol, and RBP

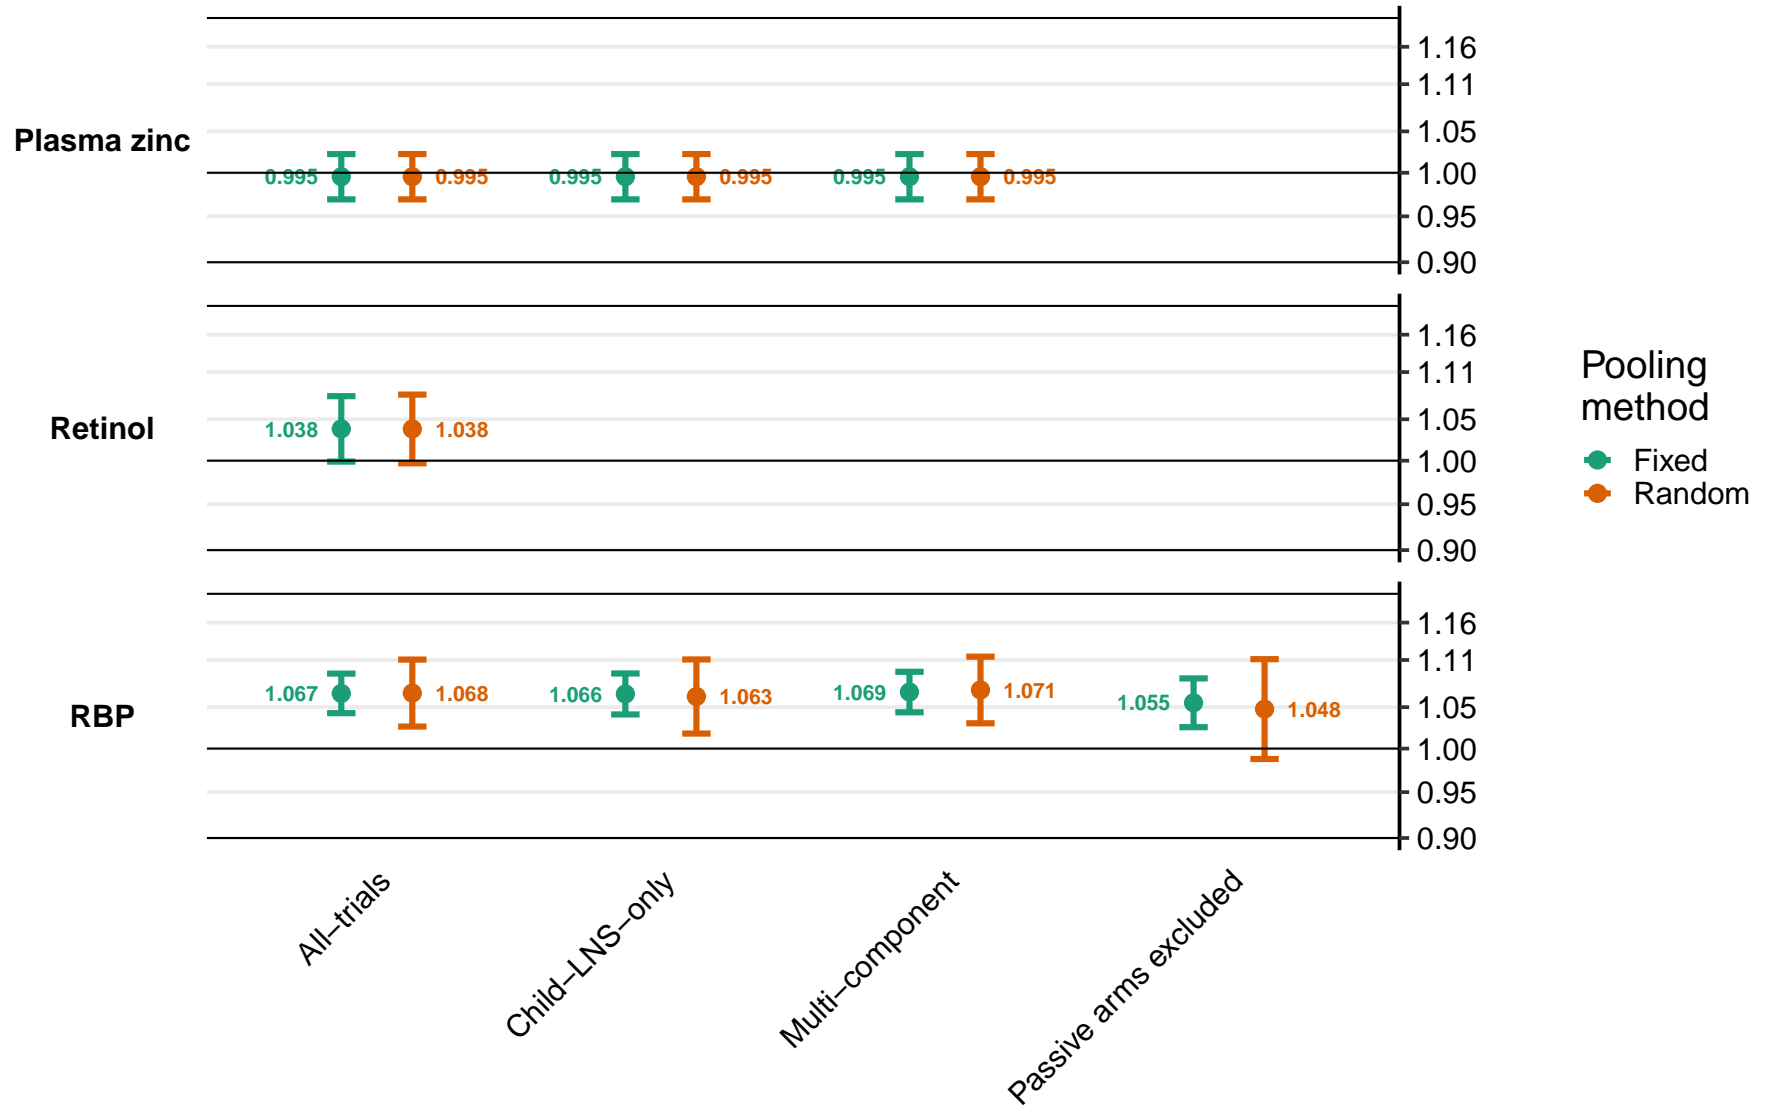

### Supplemental figure 2C: Prevalence ratios for dichotomous outcomes

Supplemental figure 2C1: Prevalence ratios for anemia, moderate-to-severe anemia, iron deficiency, iron deficiency anemia, elevated sTfR, and elevated ZPP

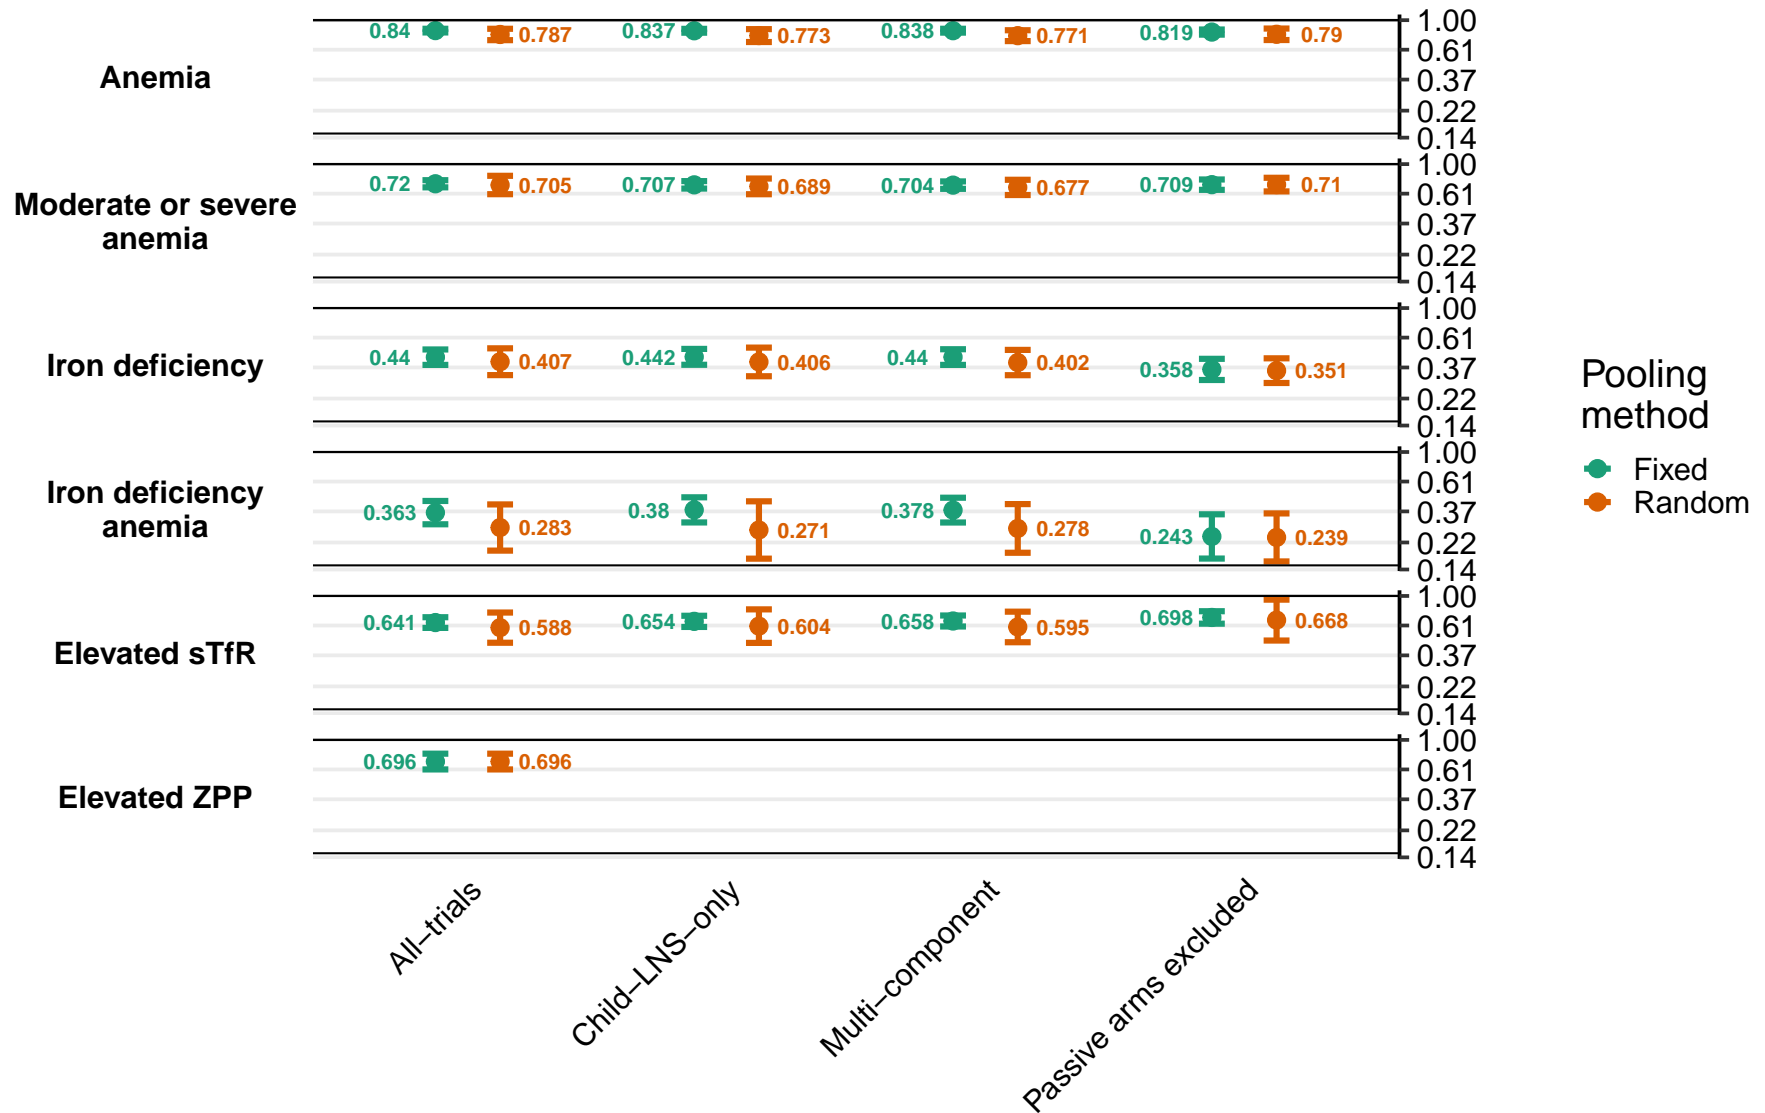

Supplemental figure 2C2: Prevalence ratios for low and marginal vitamin A status

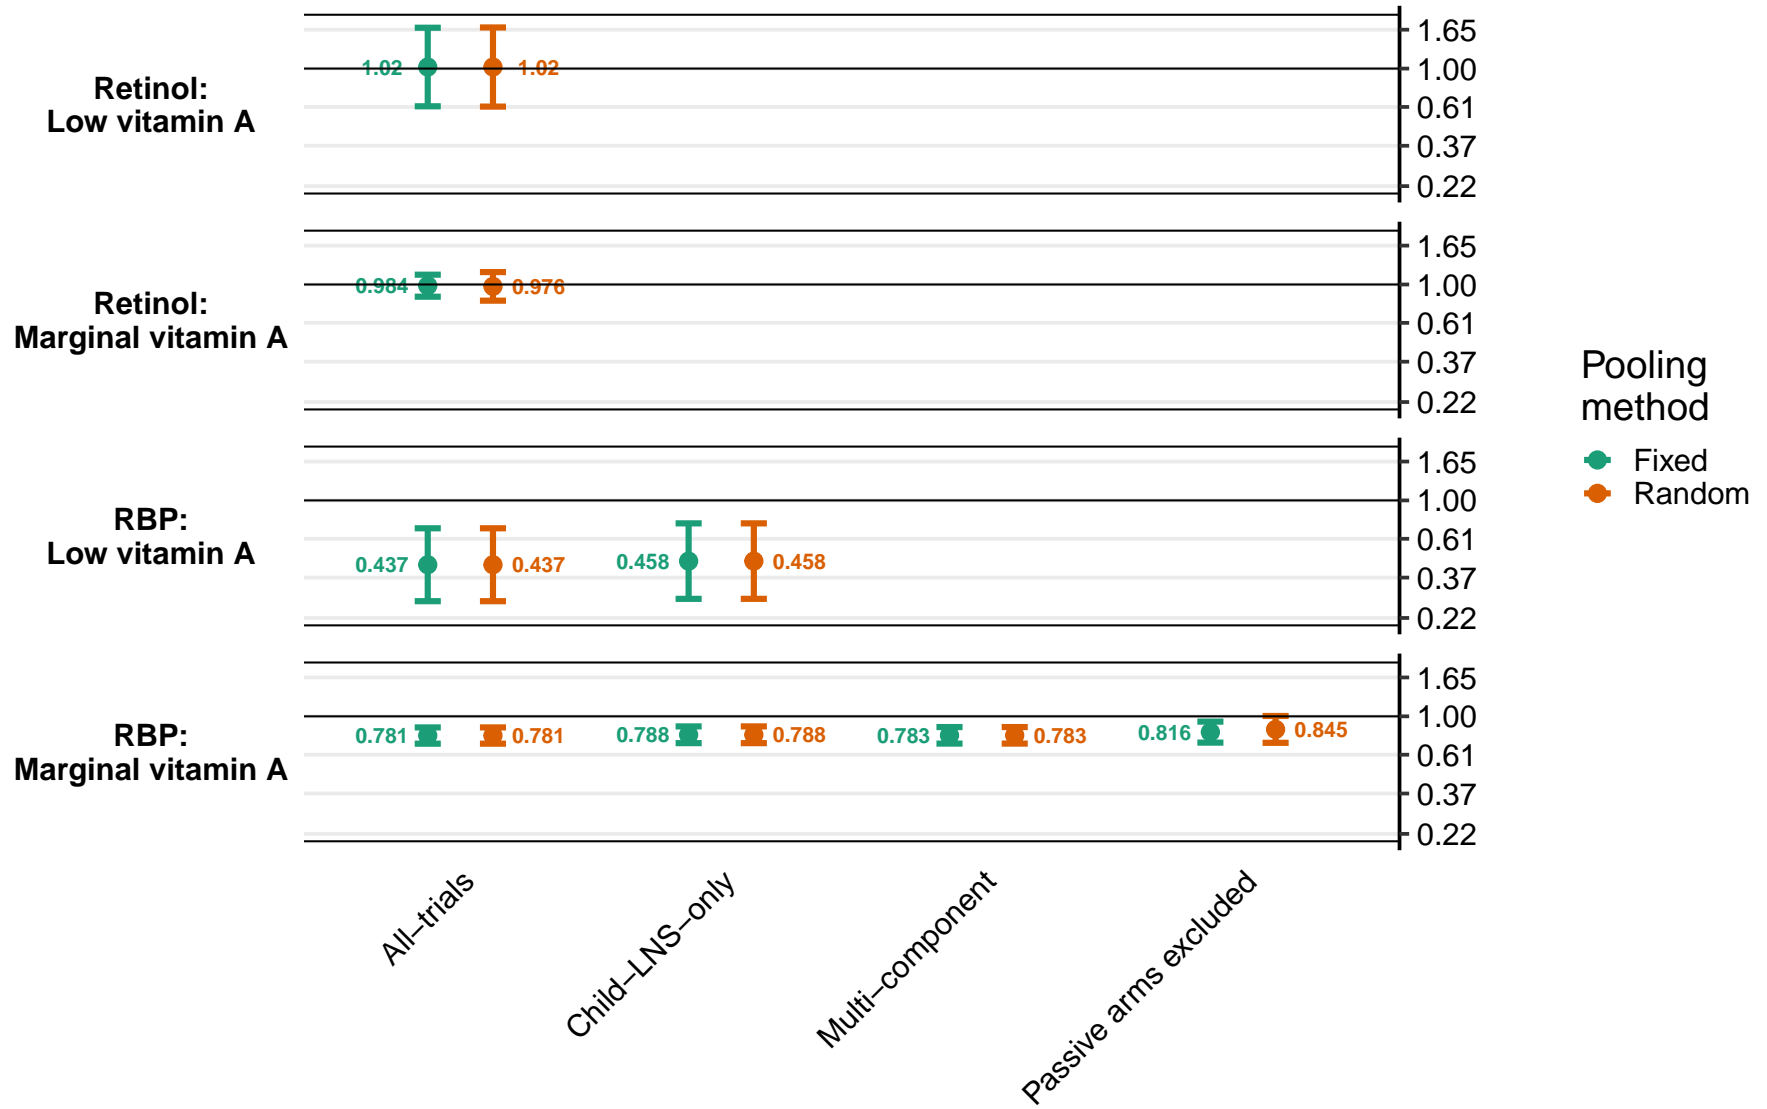

### Supplemental figure 2D: Prevalence differences for dichotomous outcomes

Supplemental figure 2D1: Prevalence differences for anemia, moderate-to-severe anemia, iron deficiency, iron deficiency anemia, elevated sTfR, and elevated ZPP

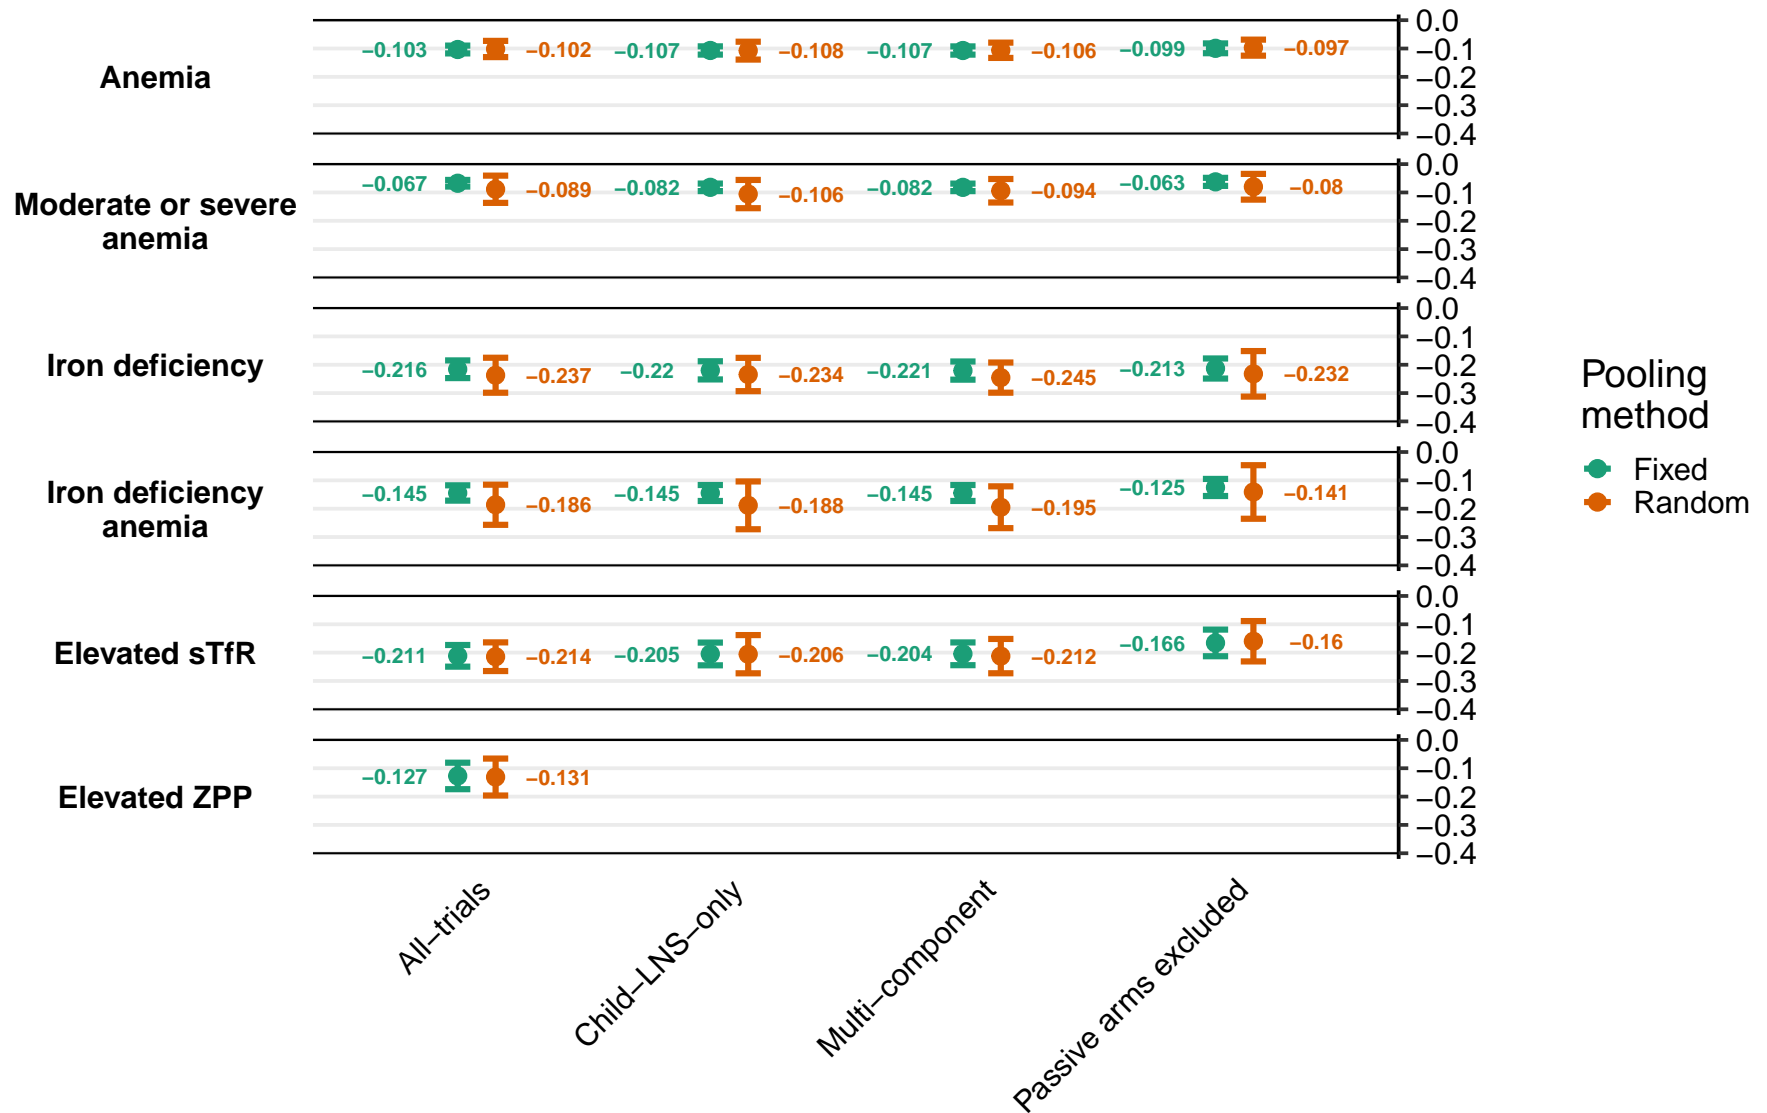



Supplemental figure 2D2: Prevalence ratios for low and marginal vitamin A status

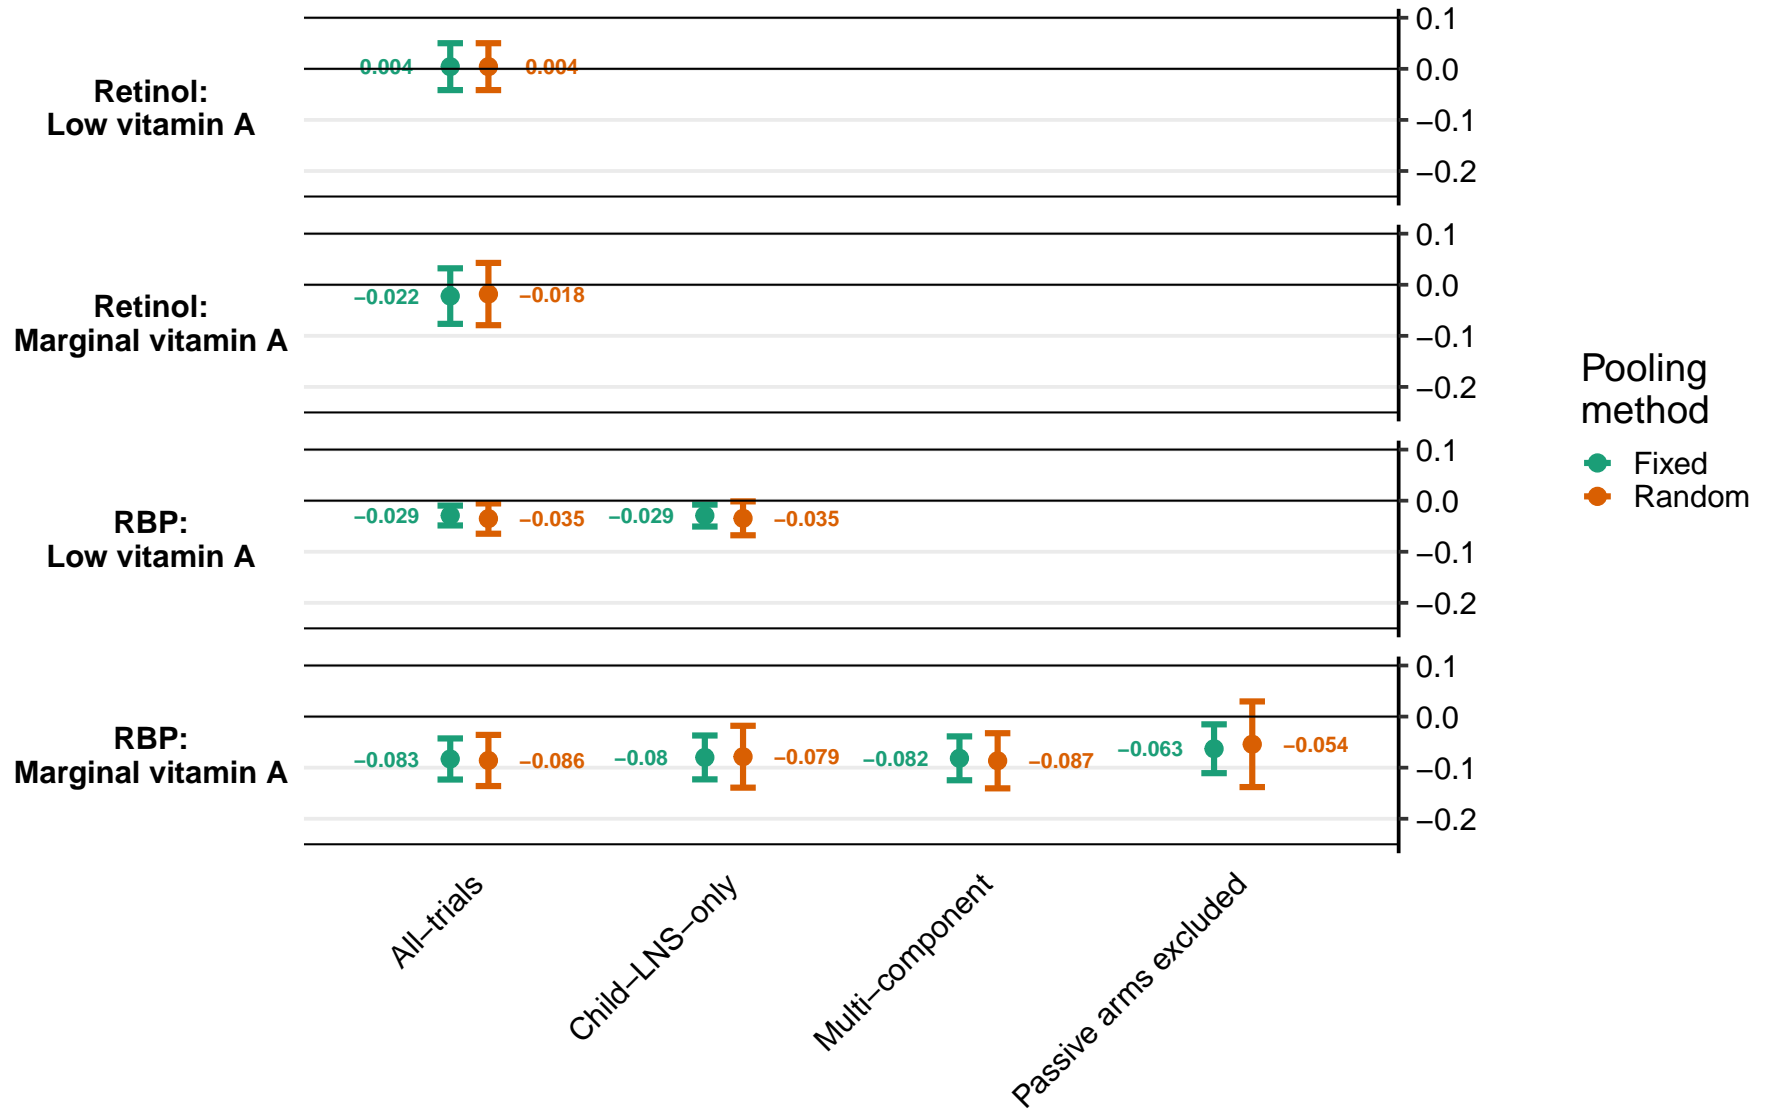

## Supplemental figure 3: Forest plots for all main effects of SQ-LNS on biochemical outcomes

### Contents

|                                                                                            |    |
|--------------------------------------------------------------------------------------------|----|
| Supplemental figure 3A: Mean difference in hemoglobin concentration                        | 3  |
| Supplemental figure 3B: Anemia prevalence ratio                                            | 4  |
| Supplemental figure 3C: Anemia prevalence difference                                       | 5  |
| Supplemental figure 3D: Moderate-to-severe anemia prevalence ratio                         | 6  |
| Supplemental figure 3E: Moderate-to-severe anemia prevalence difference                    | 7  |
| Supplemental figure 3F: Geometric mean ratio of ferritin concentration                     | 8  |
| Supplemental figure 3G: Iron deficiency (ferritin < 12 µg/L) prevalence ratio              | 9  |
| Supplemental figure 3H: Iron deficiency (ferritin < 12 µg/L) prevalence difference         | 10 |
| Supplemental figure 3I: Iron deficiency anemia prevalence ratio                            | 11 |
| Supplemental figure 3J: Iron deficiency anemia prevalence difference                       | 12 |
| Supplemental figure 3K: Geometric mean ratio of soluble transferrin receptor concentration | 13 |
| Supplemental figure 3L: Elevated soluble transferrin receptor prevalence ratio             | 14 |
| Supplemental figure 3M: Elevated soluble transferrin receptor prevalence difference        | 15 |
| Supplemental figure 3N: Geometric mean ratio of zinc protoporphyrin concentration          | 16 |
| Supplemental figure 3O: Elevated zinc protoporphyrin prevalence ratio                      | 17 |
| Supplemental figure 3P: Elevated zinc protoporphyrin prevalence difference                 | 18 |
| Supplemental figure 3Q: Geometric mean ratio of plasma zinc concentration                  | 19 |
| Supplemental figure 3R: Geometric mean ratio of retinol concentration                      | 20 |
| Supplemental figure 3S: Low vitamin A (retinol < 0.70 µmol/L) prevalence ratio             | 21 |
| Supplemental figure 3T: Low vitamin A (retinol < 0.70 µmol/L) prevalence difference        | 22 |
| Supplemental figure 3U: Marginal vitamin A (retinol < 1.05 µmol/L) prevalence ratio        | 23 |
| Supplemental figure 3V: Marginal vitamin A (retinol < 1.05 µmol/L) prevalence difference   | 24 |
| Supplemental figure 3W: Geometric mean ratio of retinol binding protein concentration      | 25 |
| Supplemental figure 3X: Low vitamin A status (RBP < 0.70 µmol/L) prevalence ratio          | 26 |
| Supplemental figure 3Y: Low vitamin A status (RBP < 0.70 µmol/L) prevalence difference     | 27 |
| Supplemental figure 3Z: Marginal vitamin A status (RBP < 1.05 µmol/L) prevalence ratio     | 28 |

Supplemental figure 3AA: Marginal vitamin A status (RBP < 1.05  $\mu\text{mol/L}$ ) prevalence difference

These figures are forest plots showing the study-level estimates of intervention effect with the pooled estimate in the bottom summary rows. For continuous outcomes the intervention effect is measured by the difference in mean of the LNS group minus control. For log transformed continuous outcomes, the intervention effect is measured by the ratio of geometric means, the effect estimate is the geometric mean in the LNS group divided by the geometric mean in the control group. For dichotomous outcomes analyzed via prevalence ratios the effect estimate is the prevalence in the LNS group divided by the prevalence in the control group. For dichotomous outcomes analyzed via prevalence differences the effect estimate is the prevalence in the LNS group minus the prevalence in the control group. The labels on the left y-axis correspond to trial level information. The values on the right indicate the study level effect estimate, confidence interval, and weighting for deriving the pooled estimate. RBP, retinol binding protein.

### Supplemental figure 3A: Mean difference in hemoglobin concentration

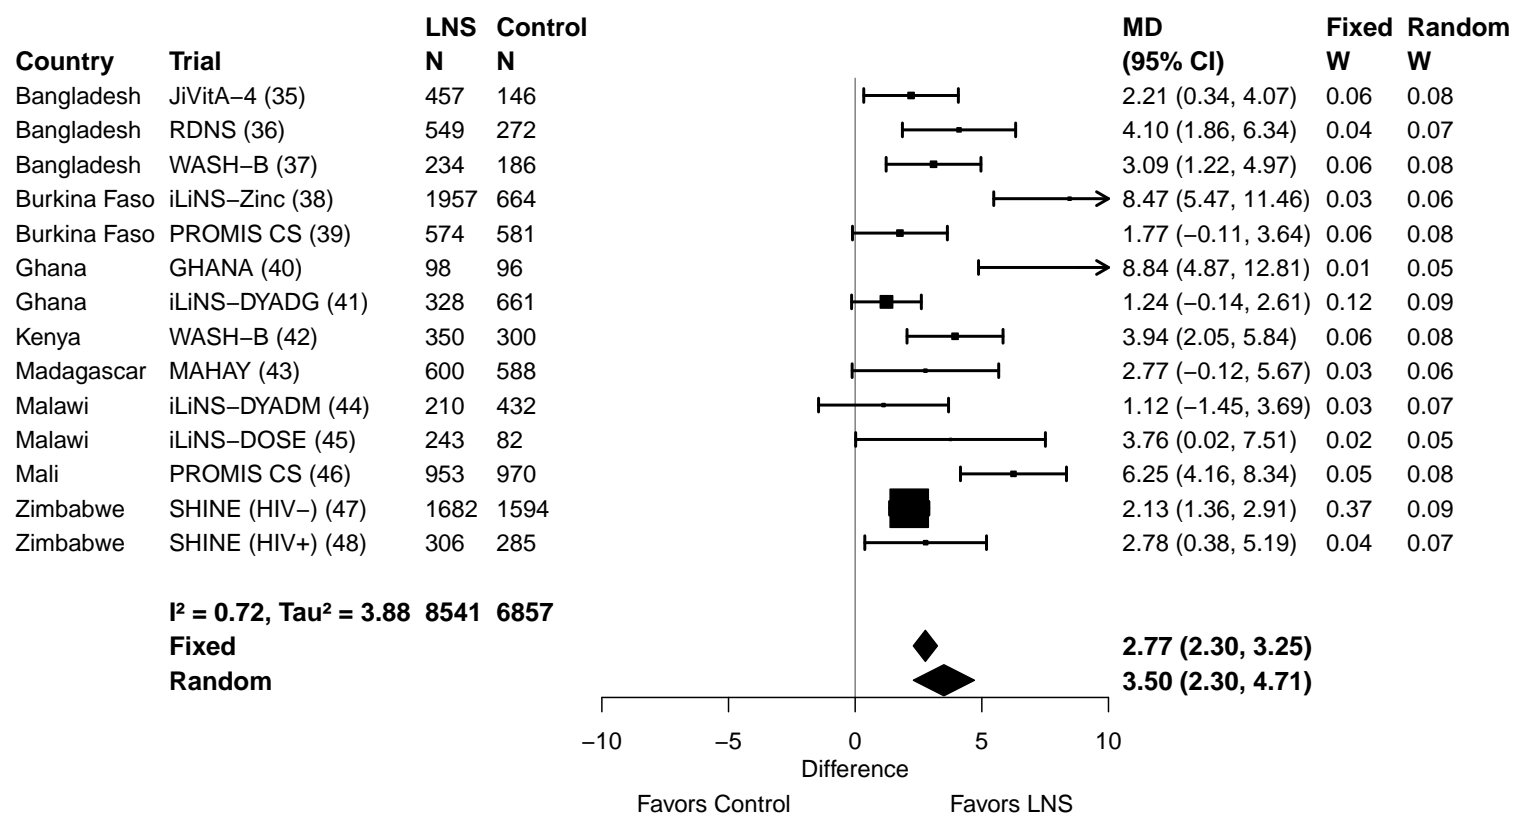

### Supplemental figure 3B: Anemia prevalence ratio

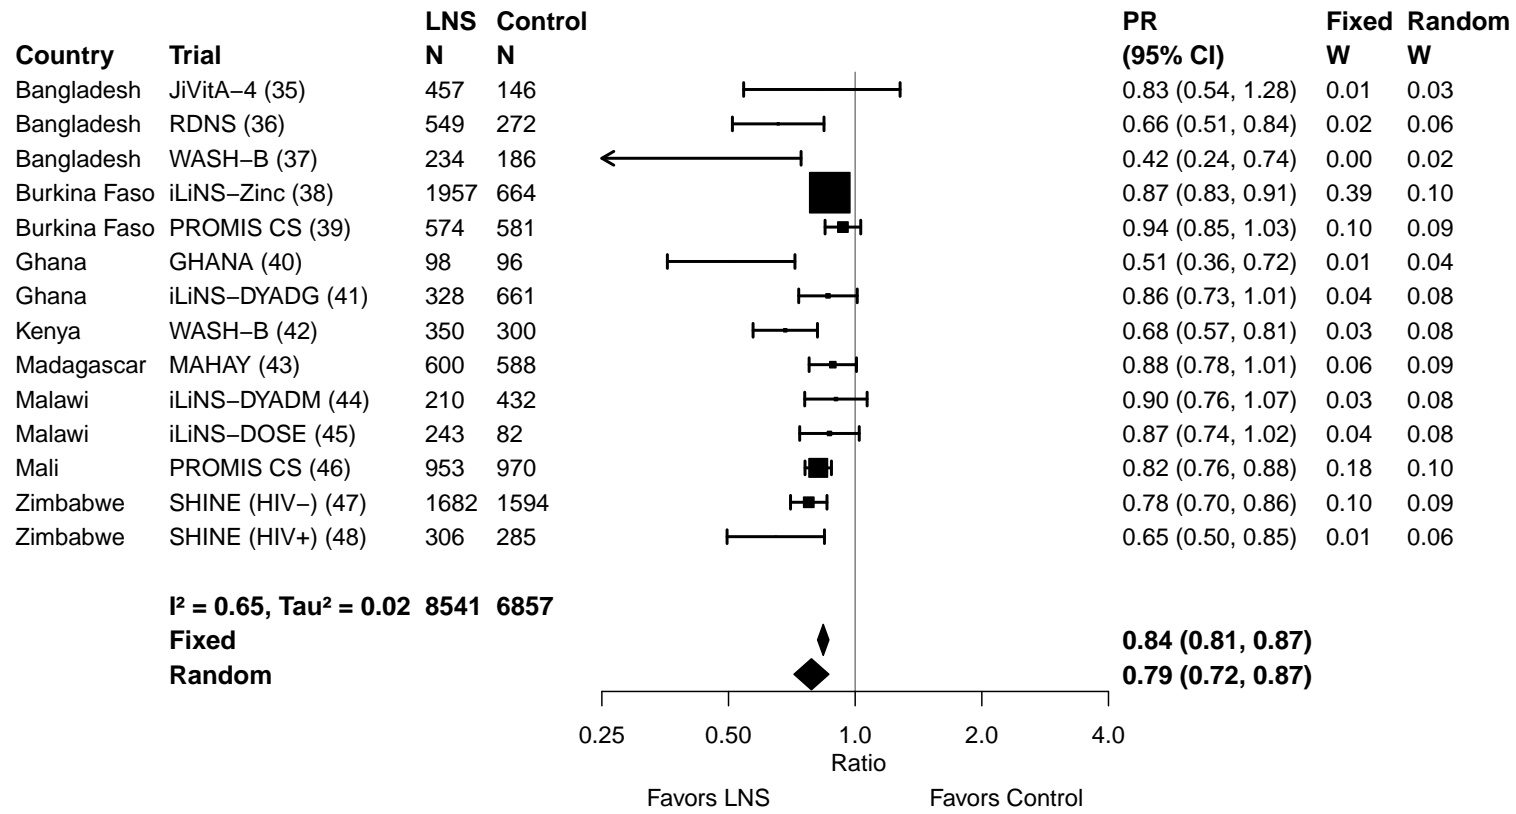

### Supplemental figure 3C: Anemia prevalence difference

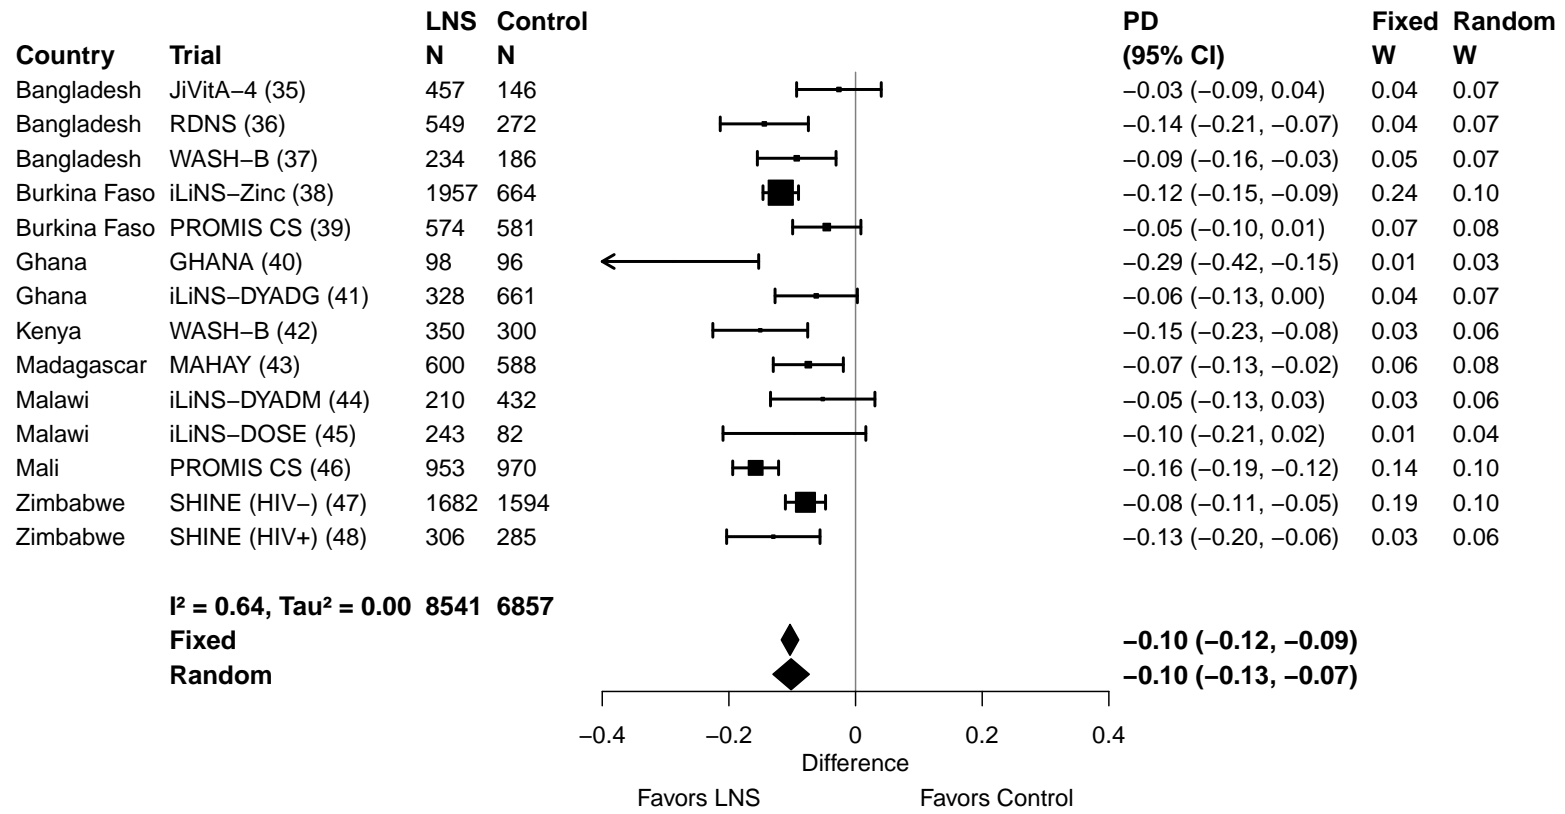

### Supplemental figure 3D: Moderate-to-severe anemia prevalence ratio

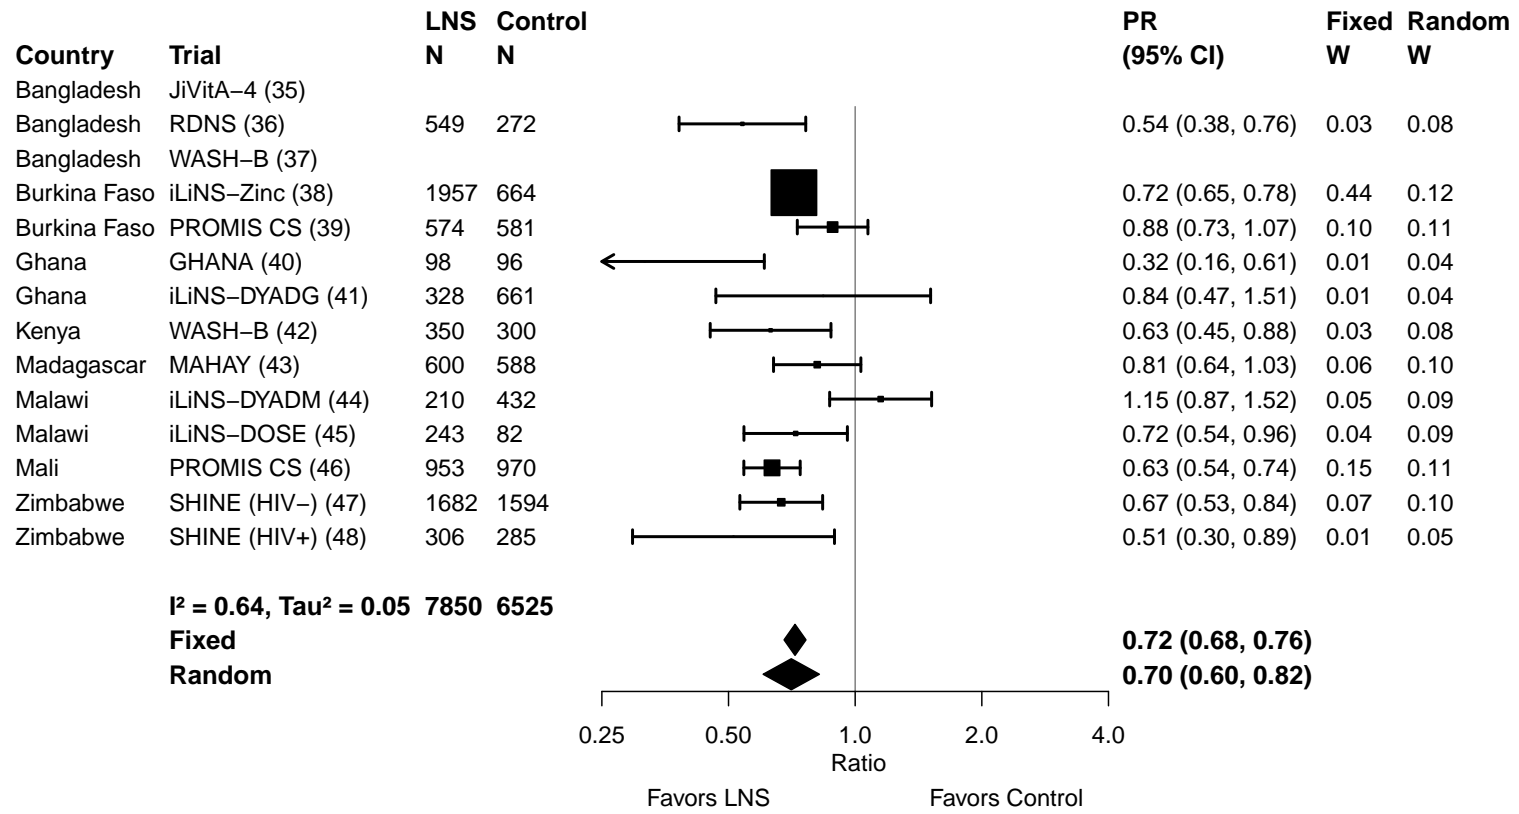

### Supplemental figure 3E: Moderate-to-severe anemia prevalence difference

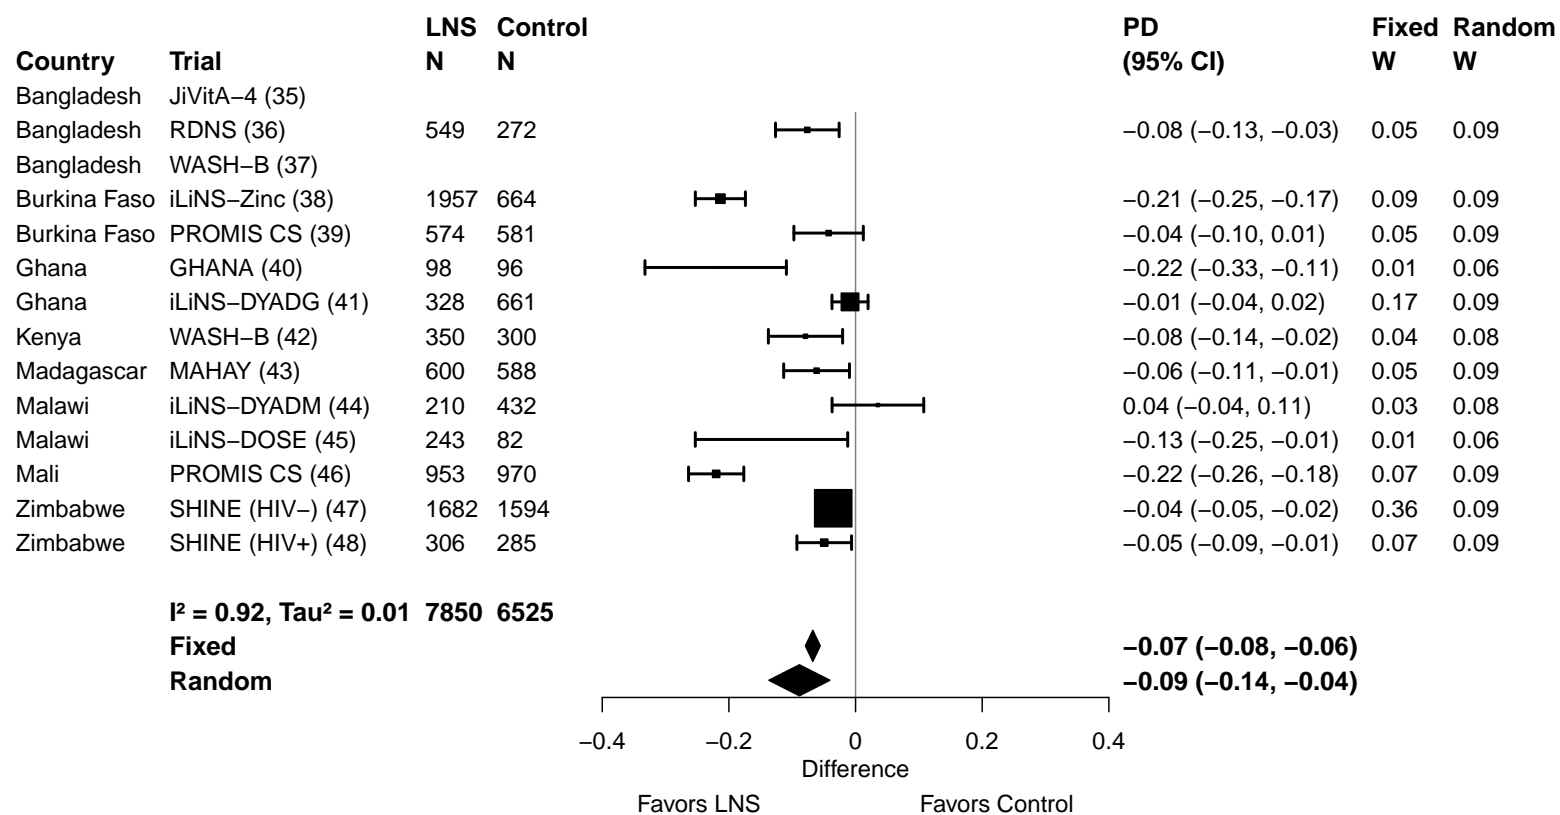



### Supplemental figure 3F: Geometric mean ratio of ferritin concentration

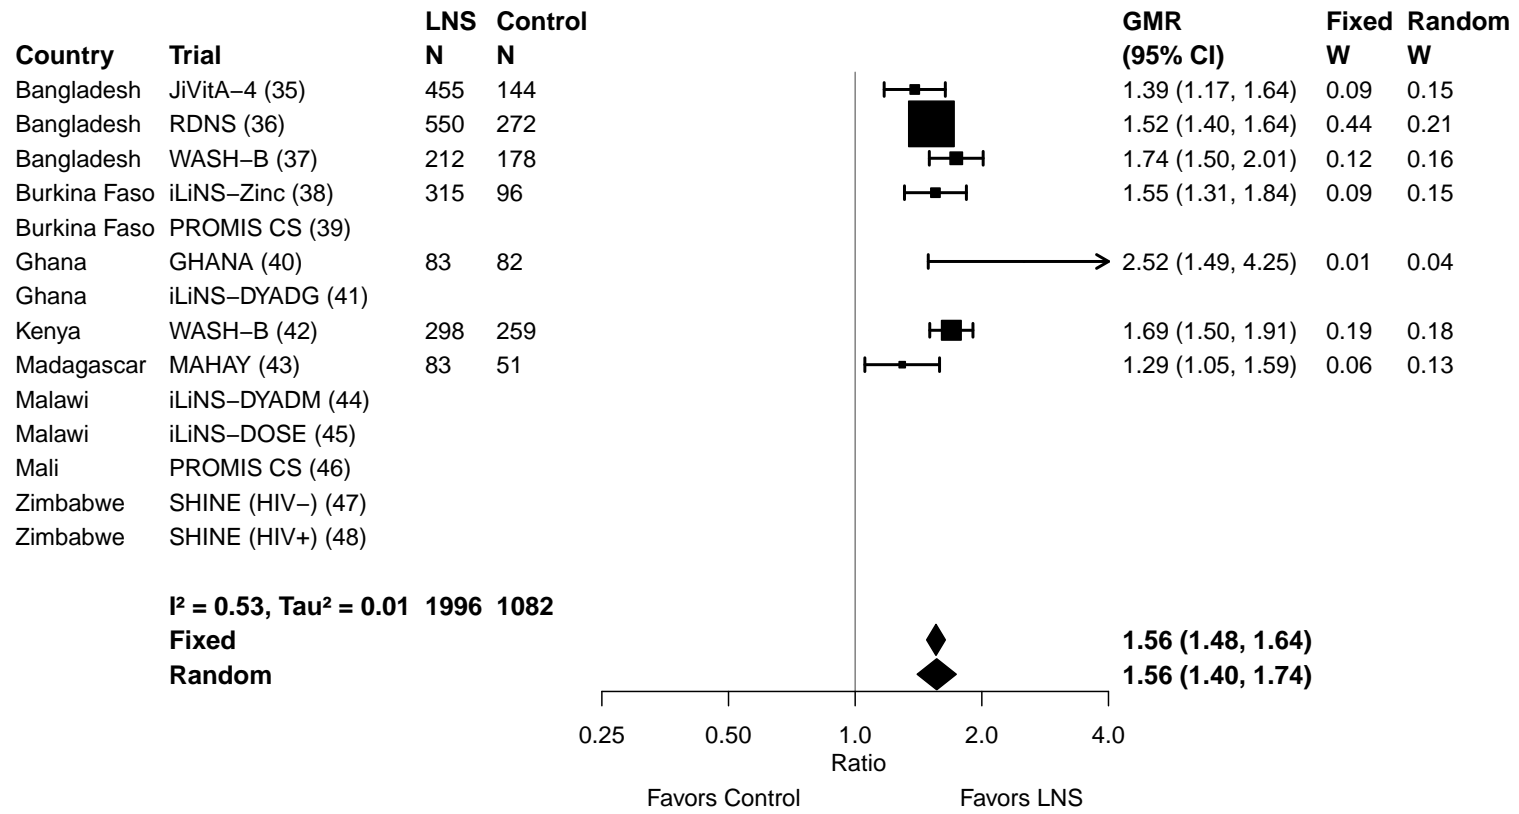

Supplemental figure 3G: Iron deficiency (ferritin < 12 µg/L) prevalence ratio

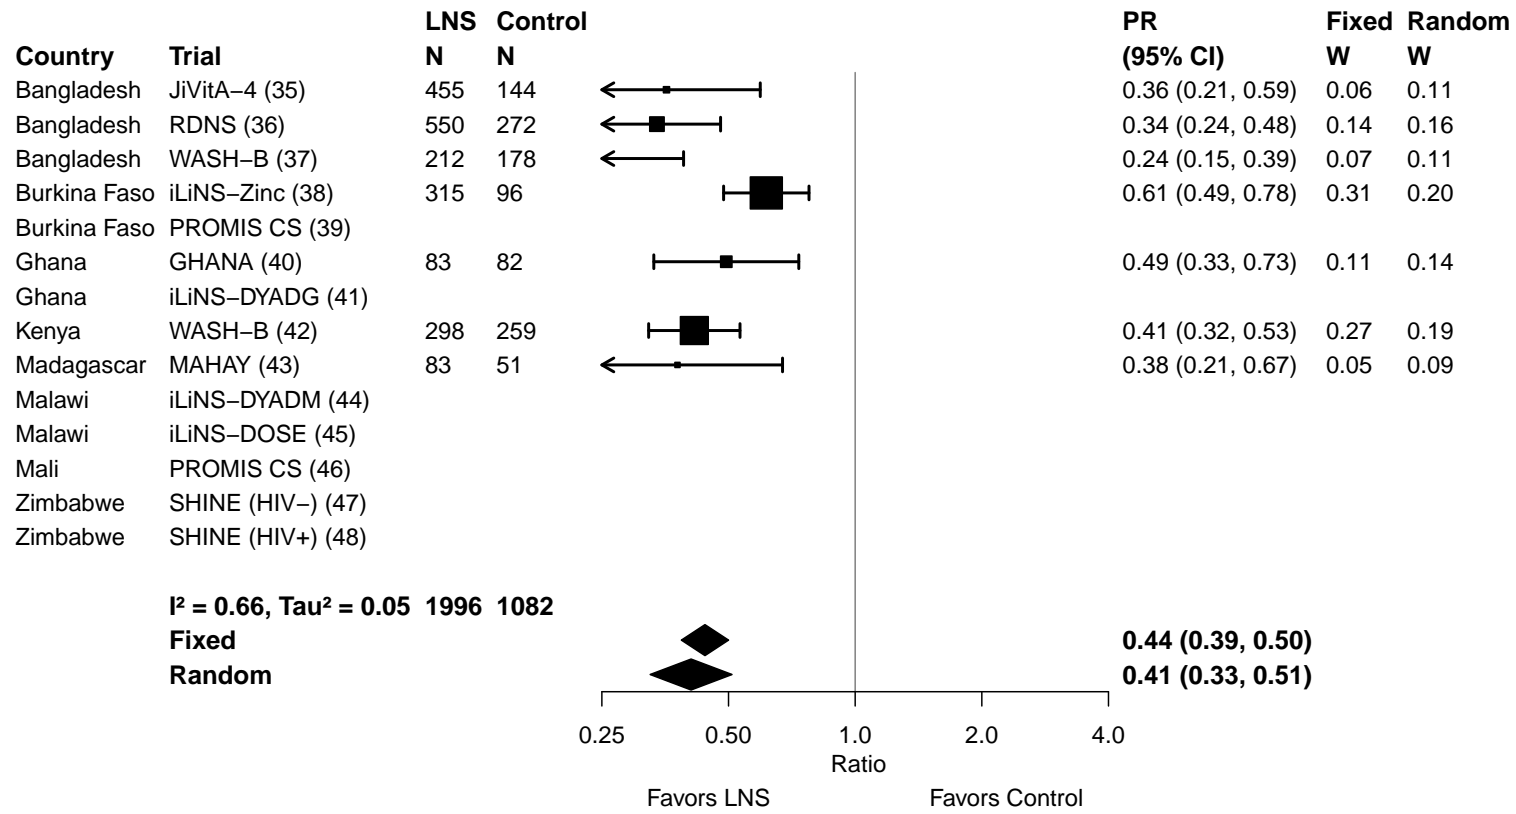

### Supplemental figure 3H: Iron deficiency (ferritin < 12 µg/L) prevalence difference

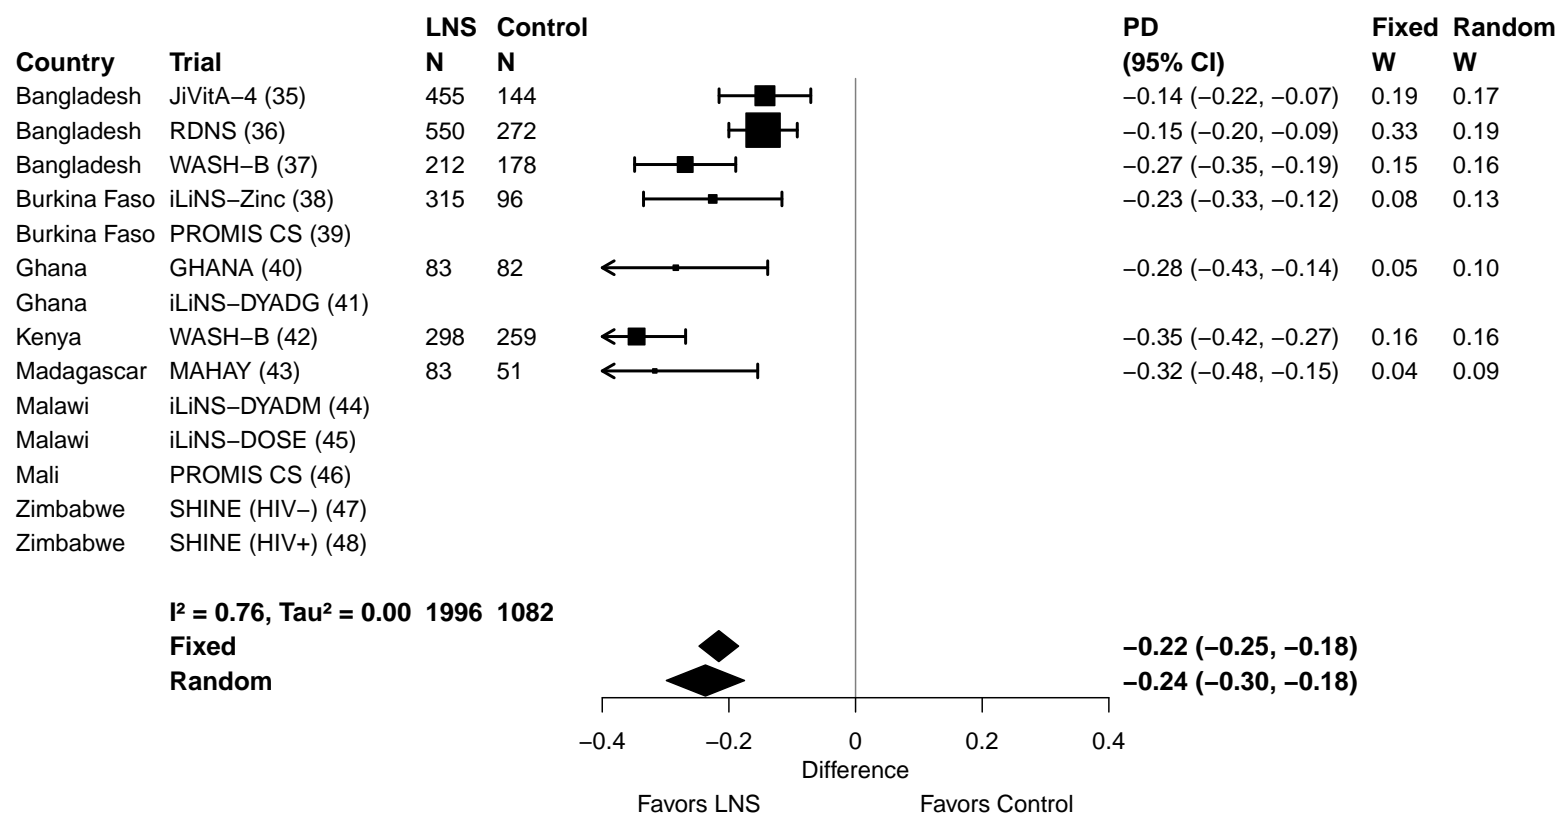

### Supplemental figure 3I: Iron deficiency anemia prevalence ratio

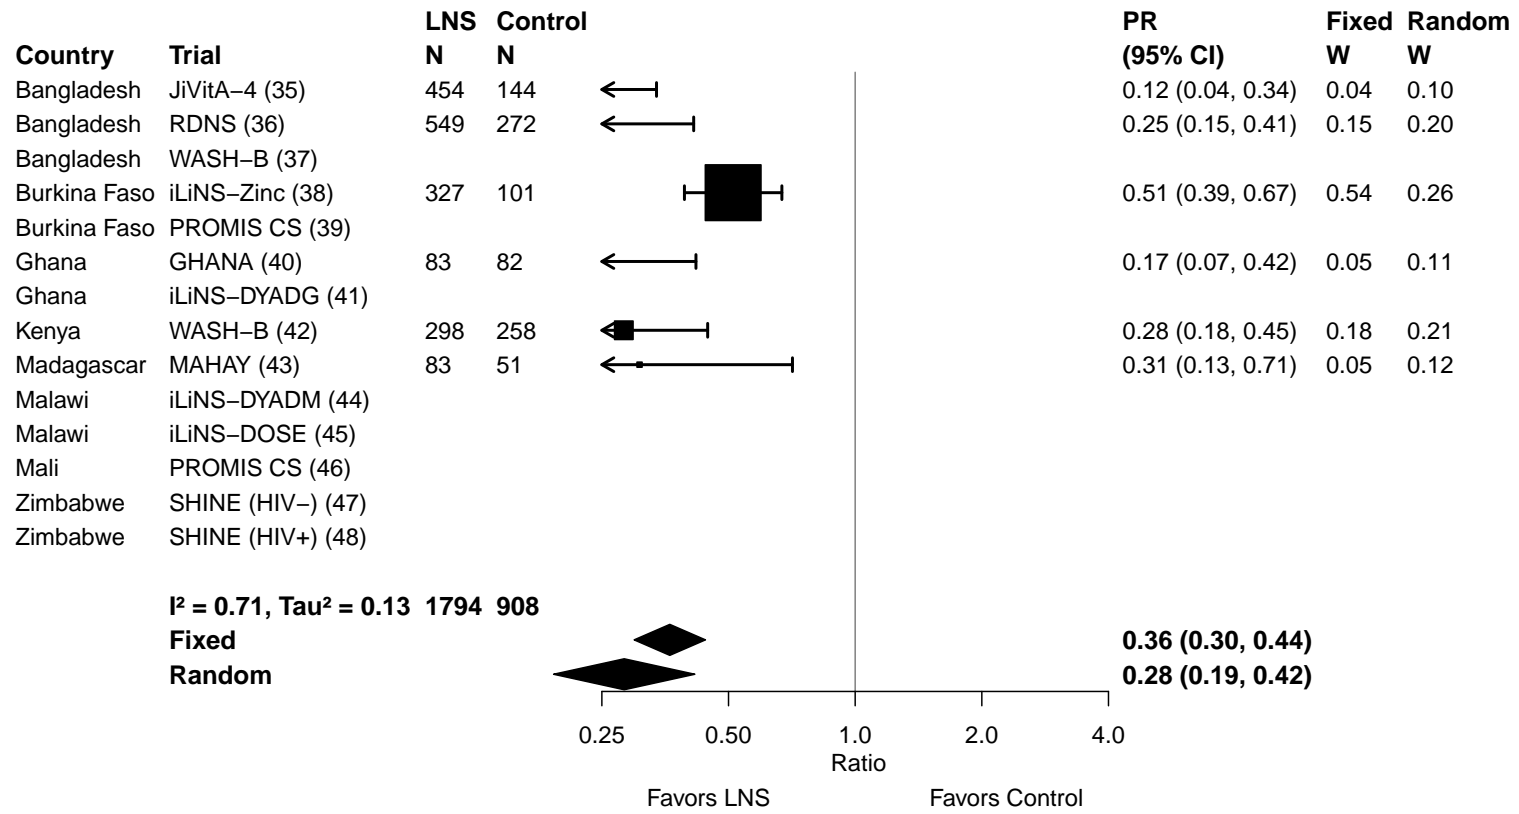

### Supplemental figure 3J: Iron deficiency anemia prevalence difference

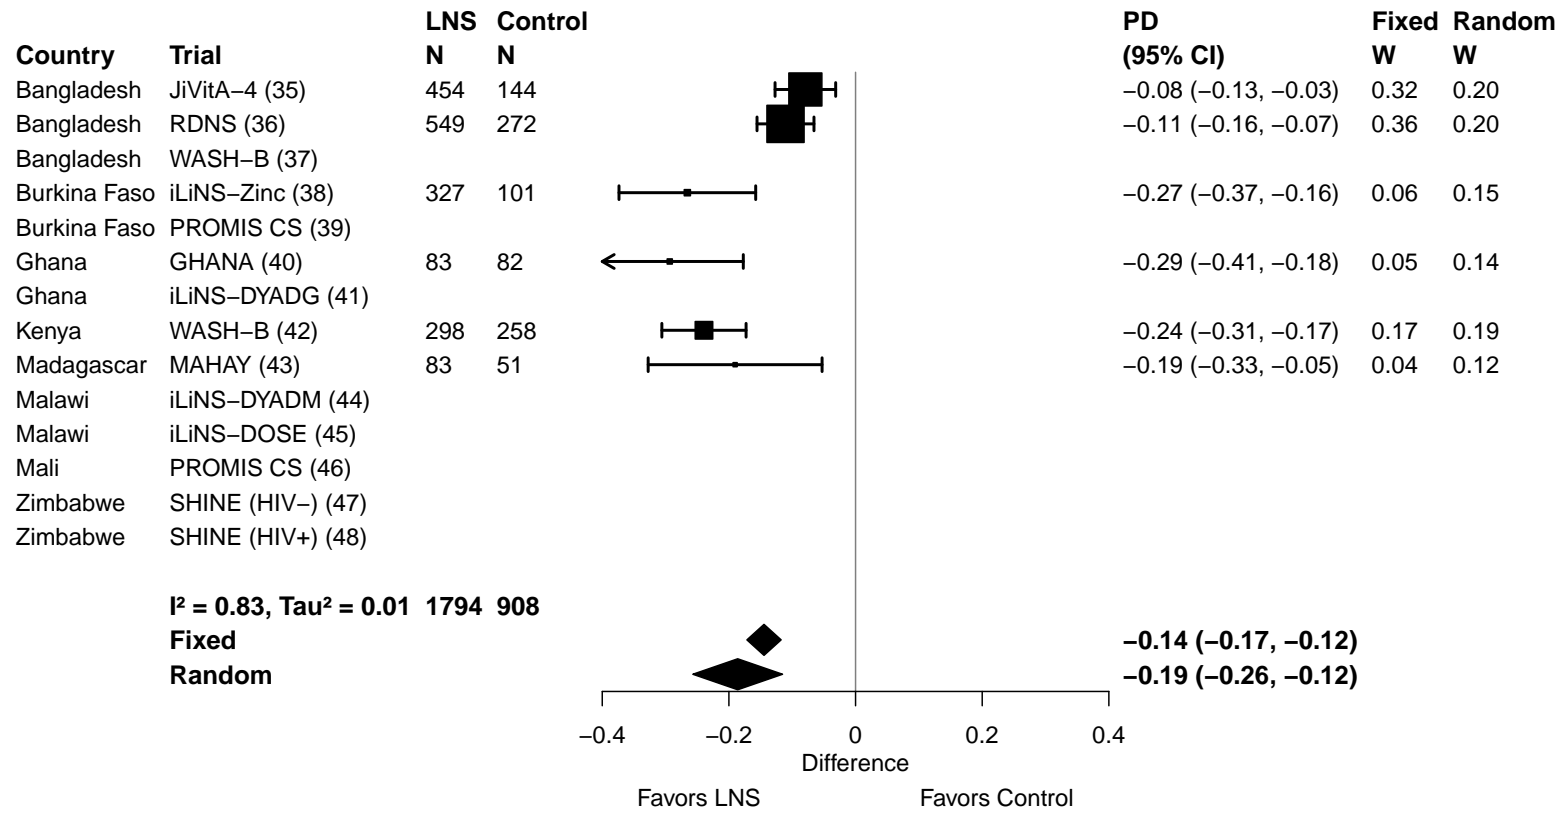

Supplemental figure 3K: Geometric mean ratio of soluble transferrin receptor concentration

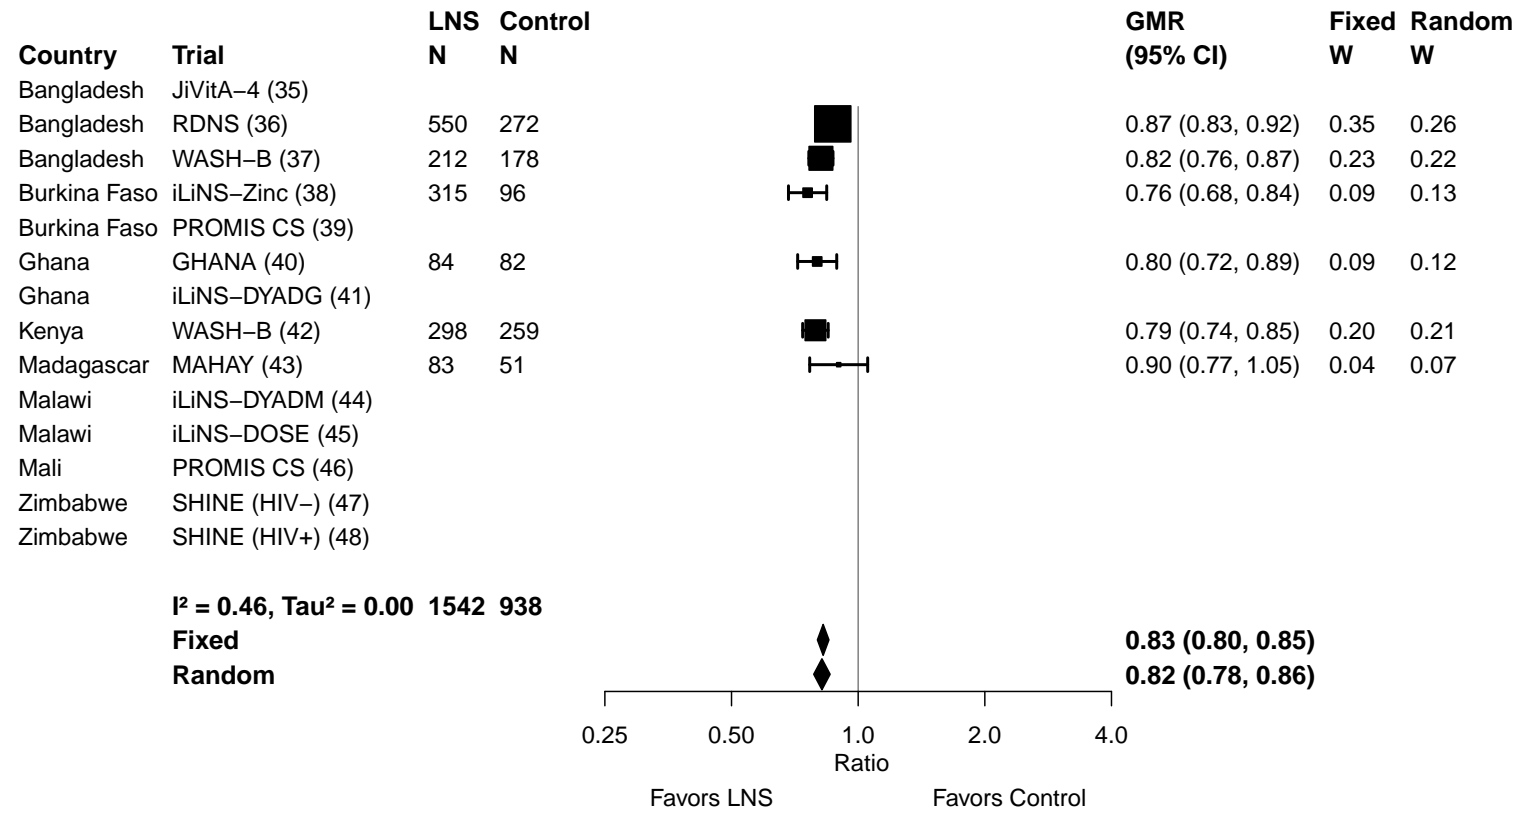

### Supplemental figure 3L: Elevated soluble transferrin receptor prevalence ratio

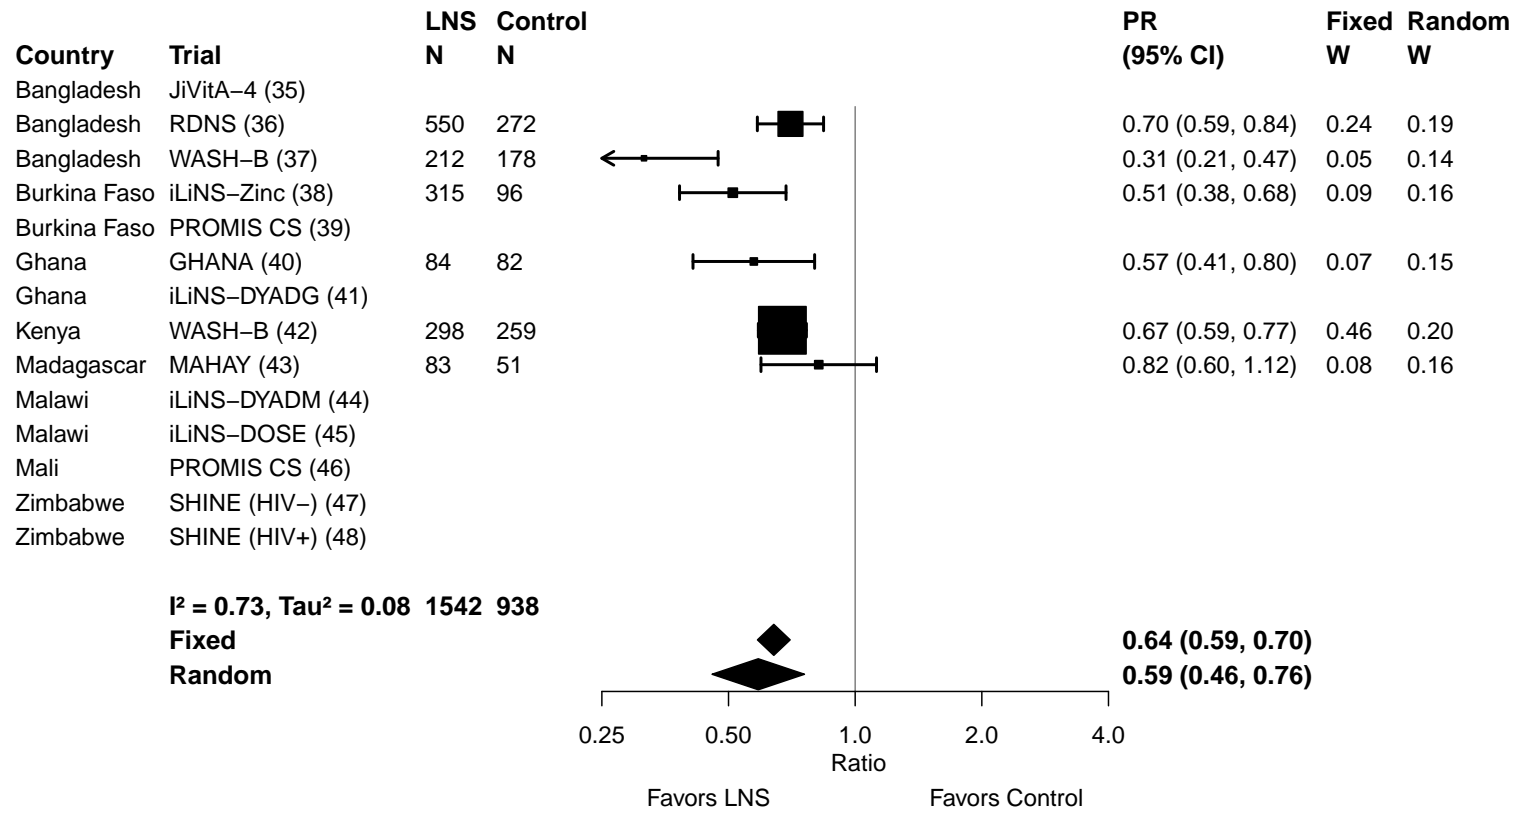

### Supplemental figure 3M: Elevated soluble transferrin receptor prevalence difference

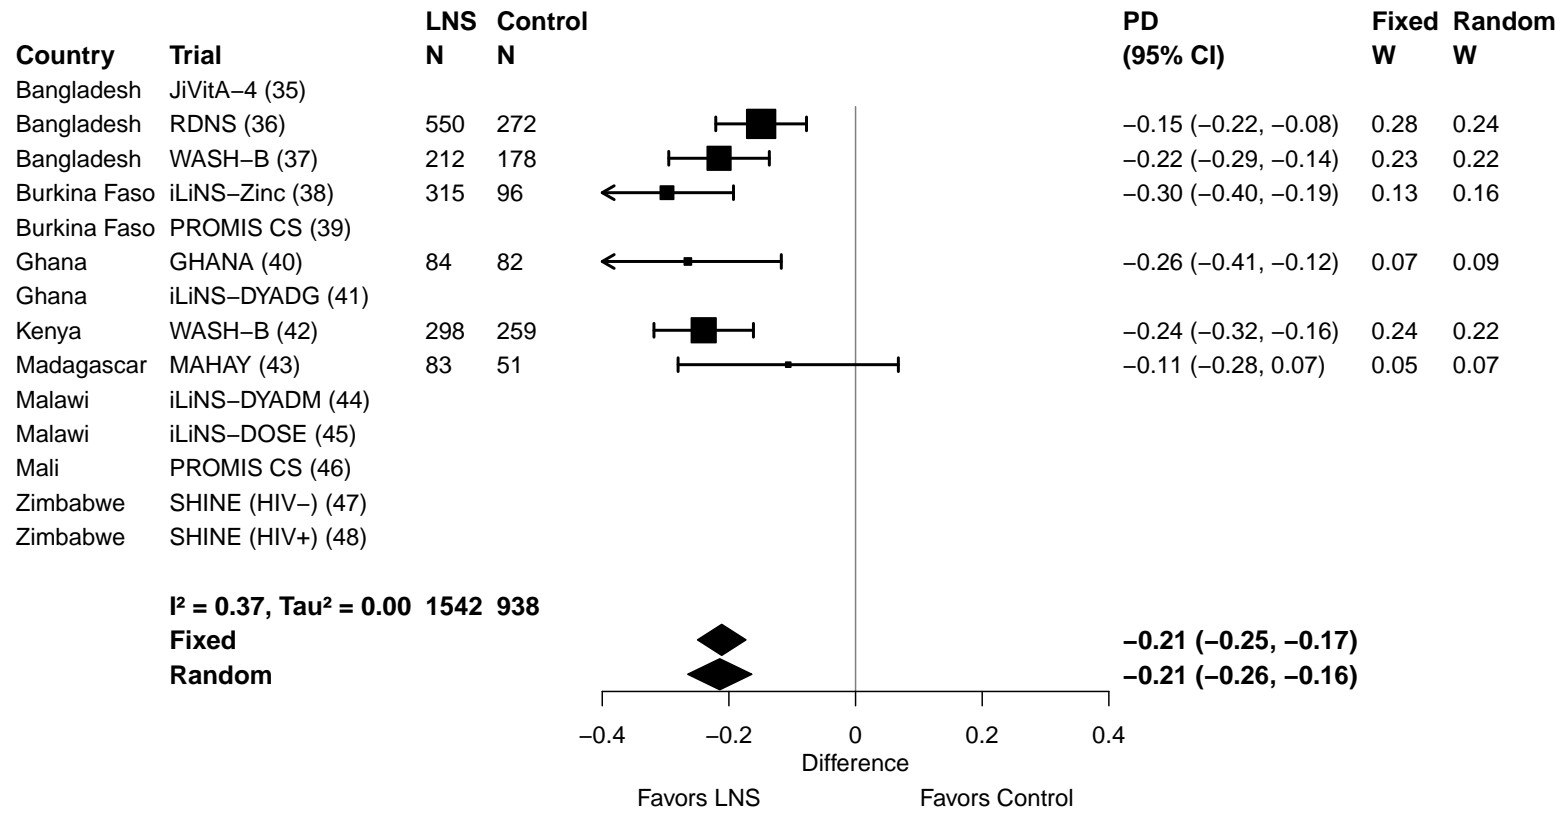



### Supplemental figure 3N: Geometric mean ratio of zinc protoporphyrin concentration

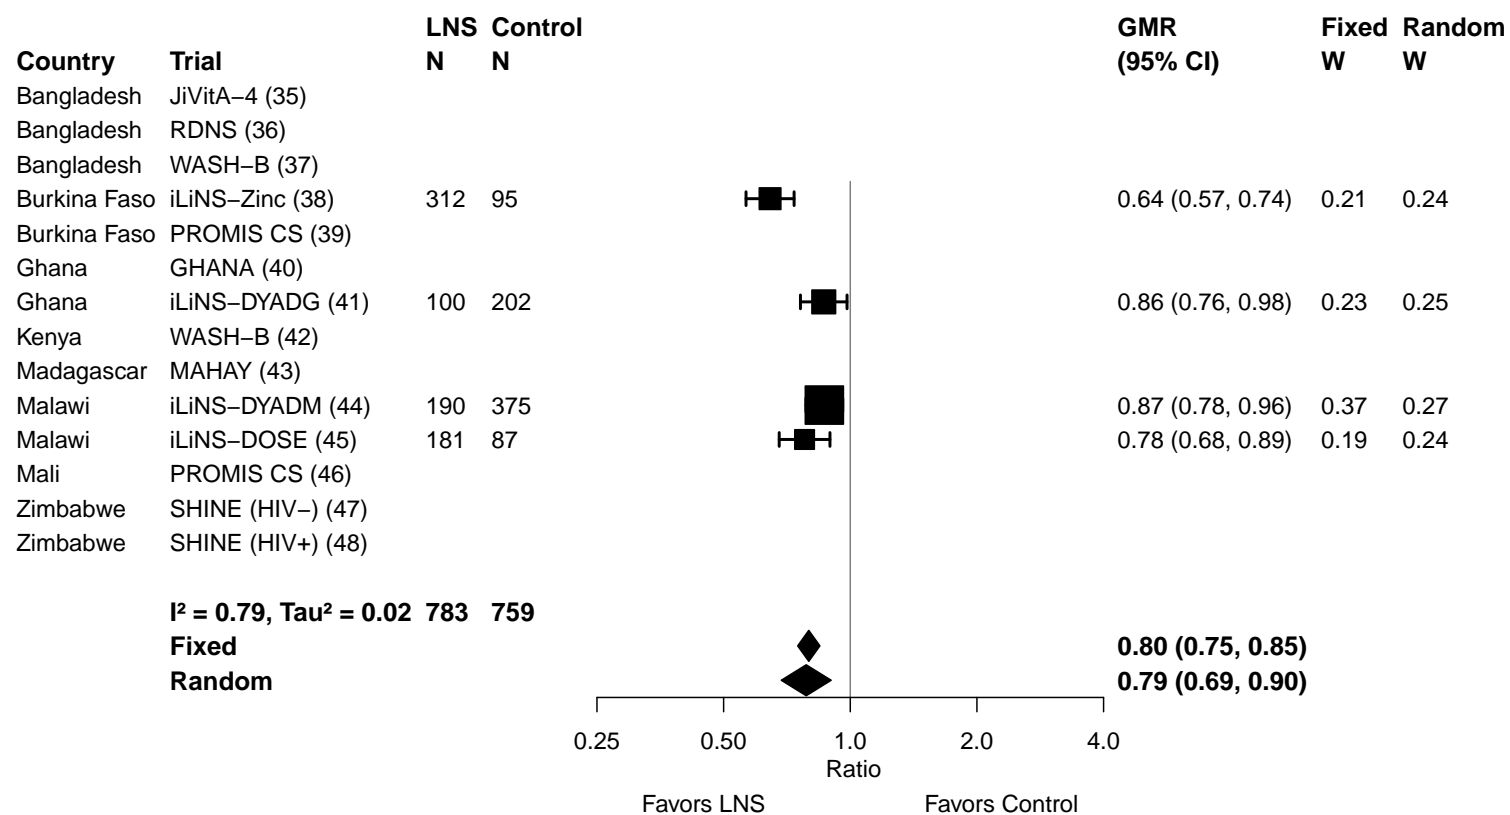

### Supplemental figure 3O: Elevated zinc protoporphyrin prevalence ratio

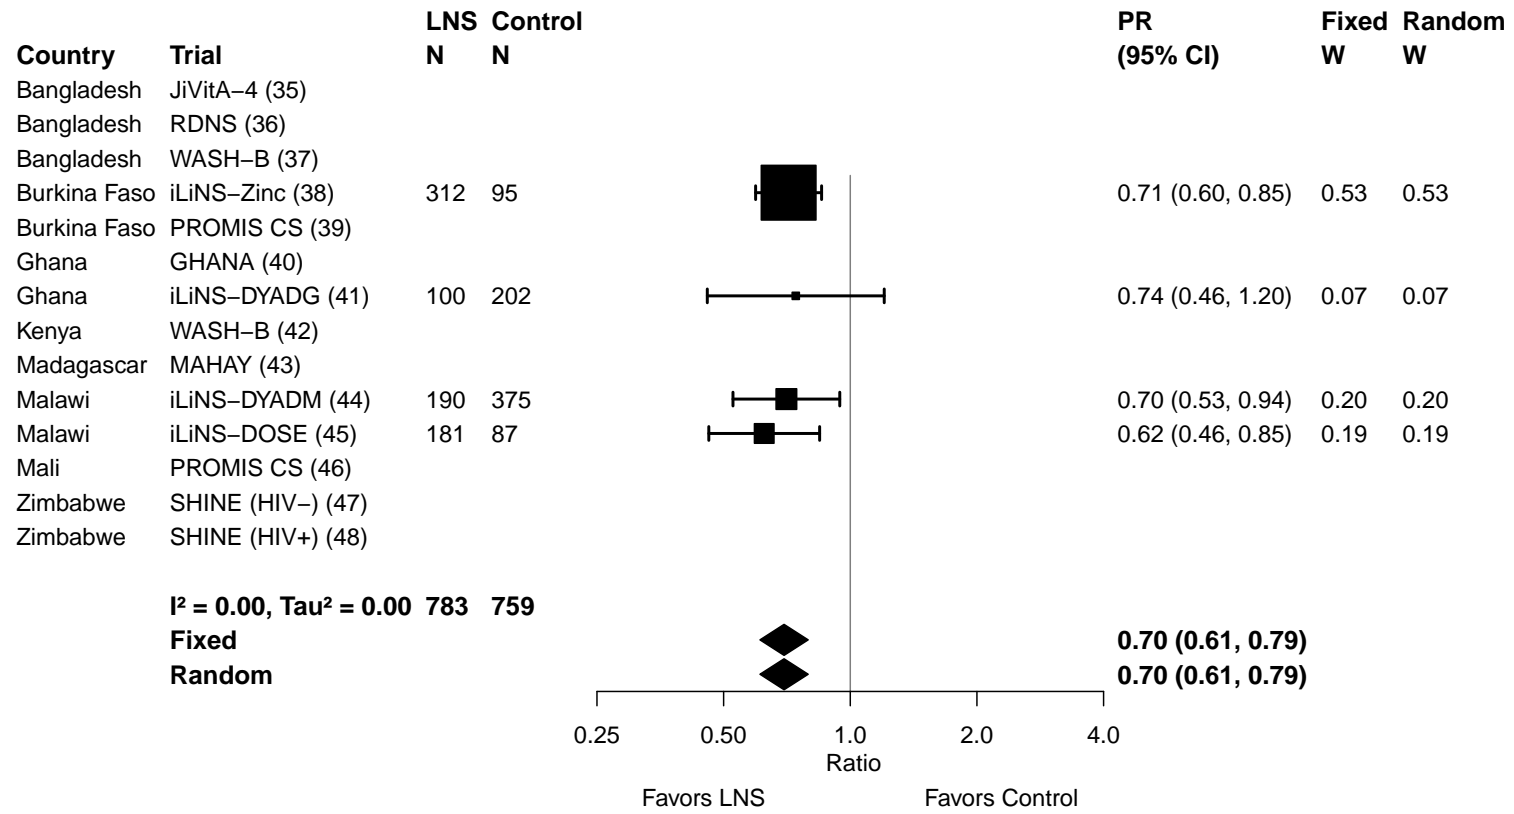

### Supplemental figure 3P: Elevated zinc protoporphyrin prevalence difference

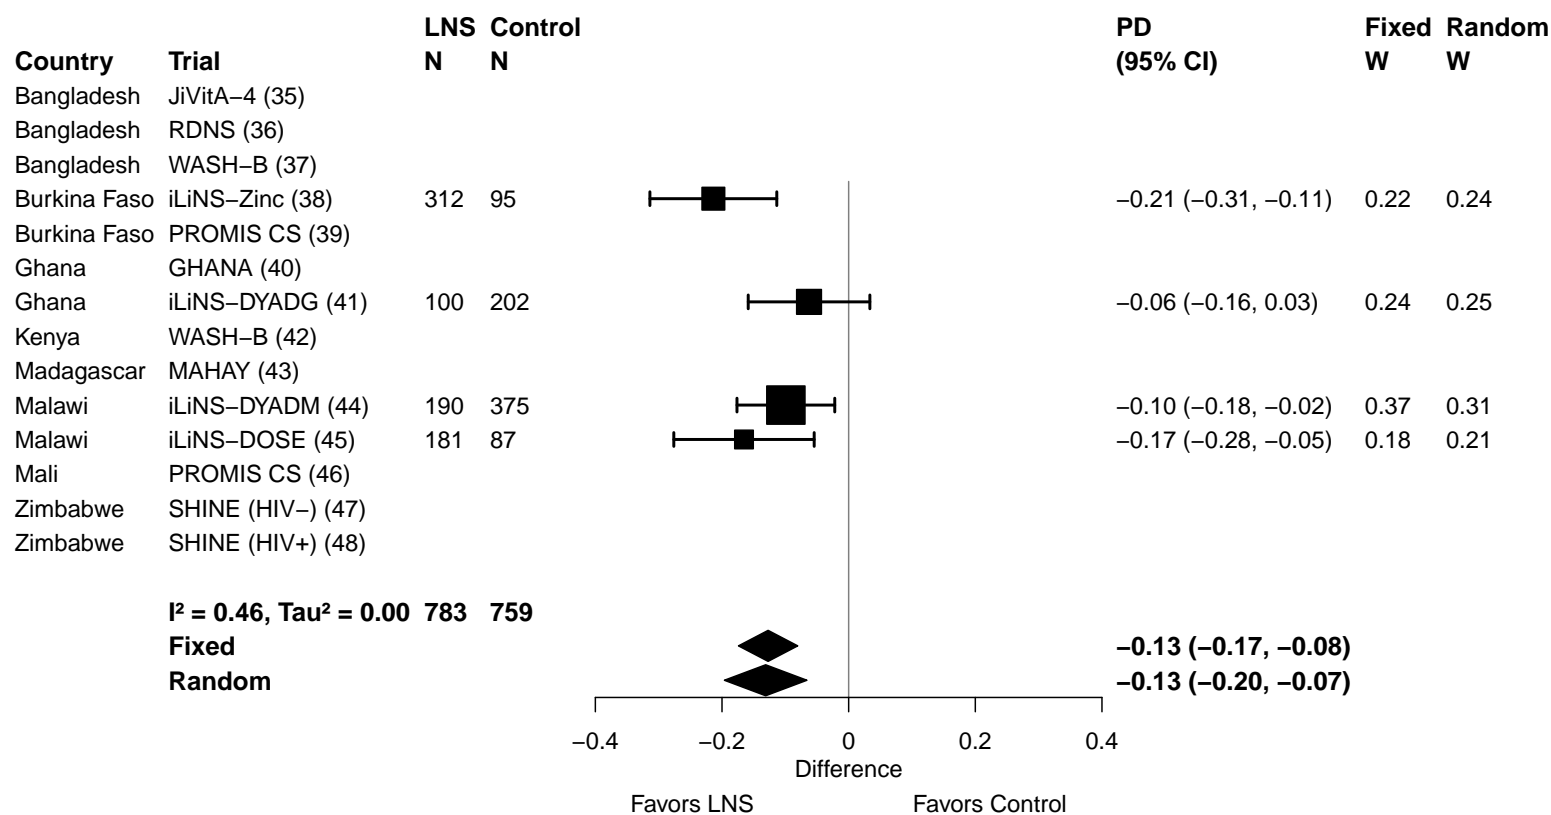

### Supplemental figure 3Q: Geometric mean ratio of plasma zinc concentration

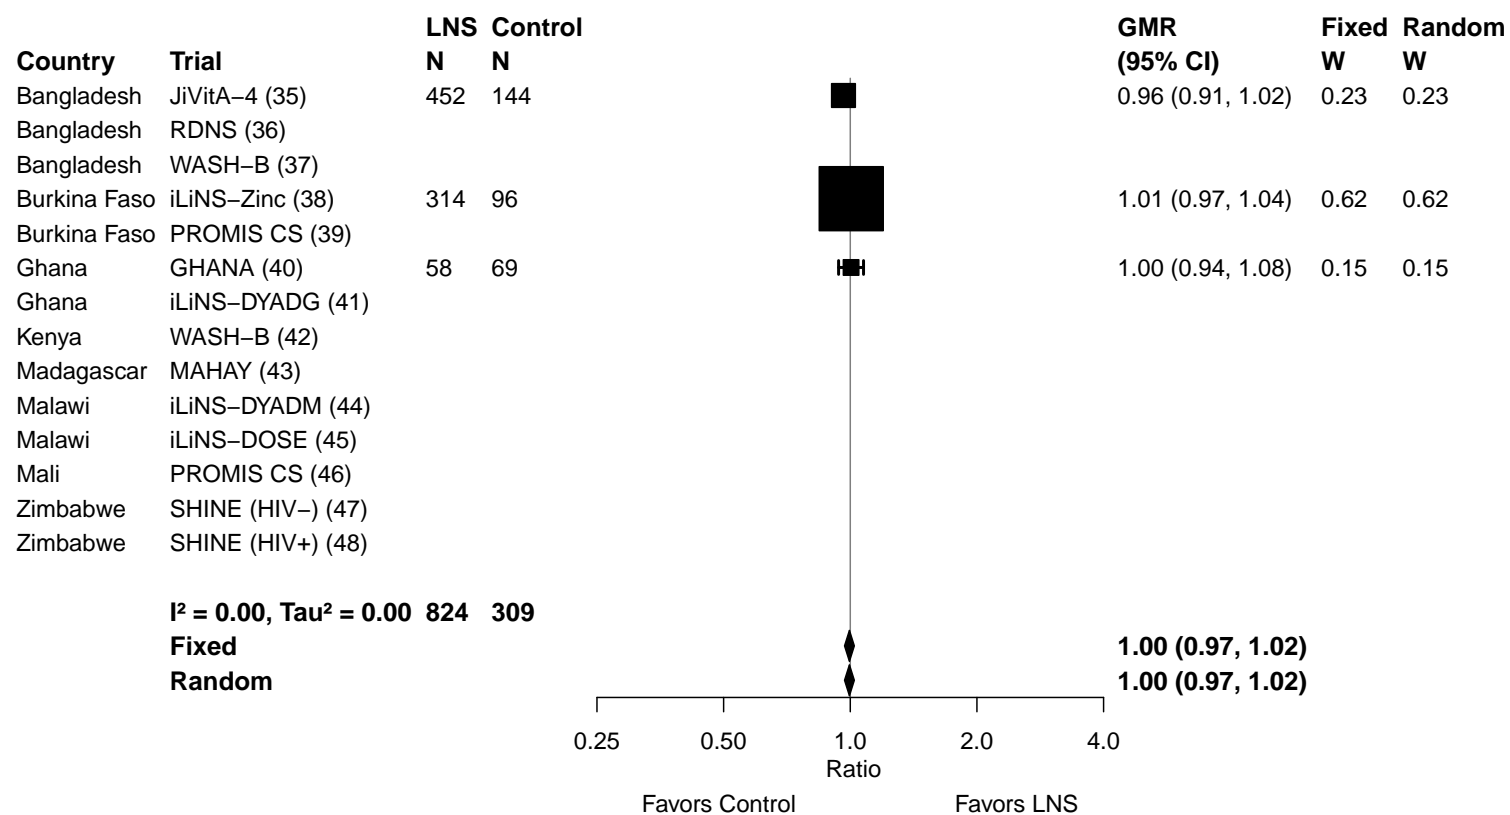

### Supplemental figure 3R: Geometric mean ratio of retinol concentration

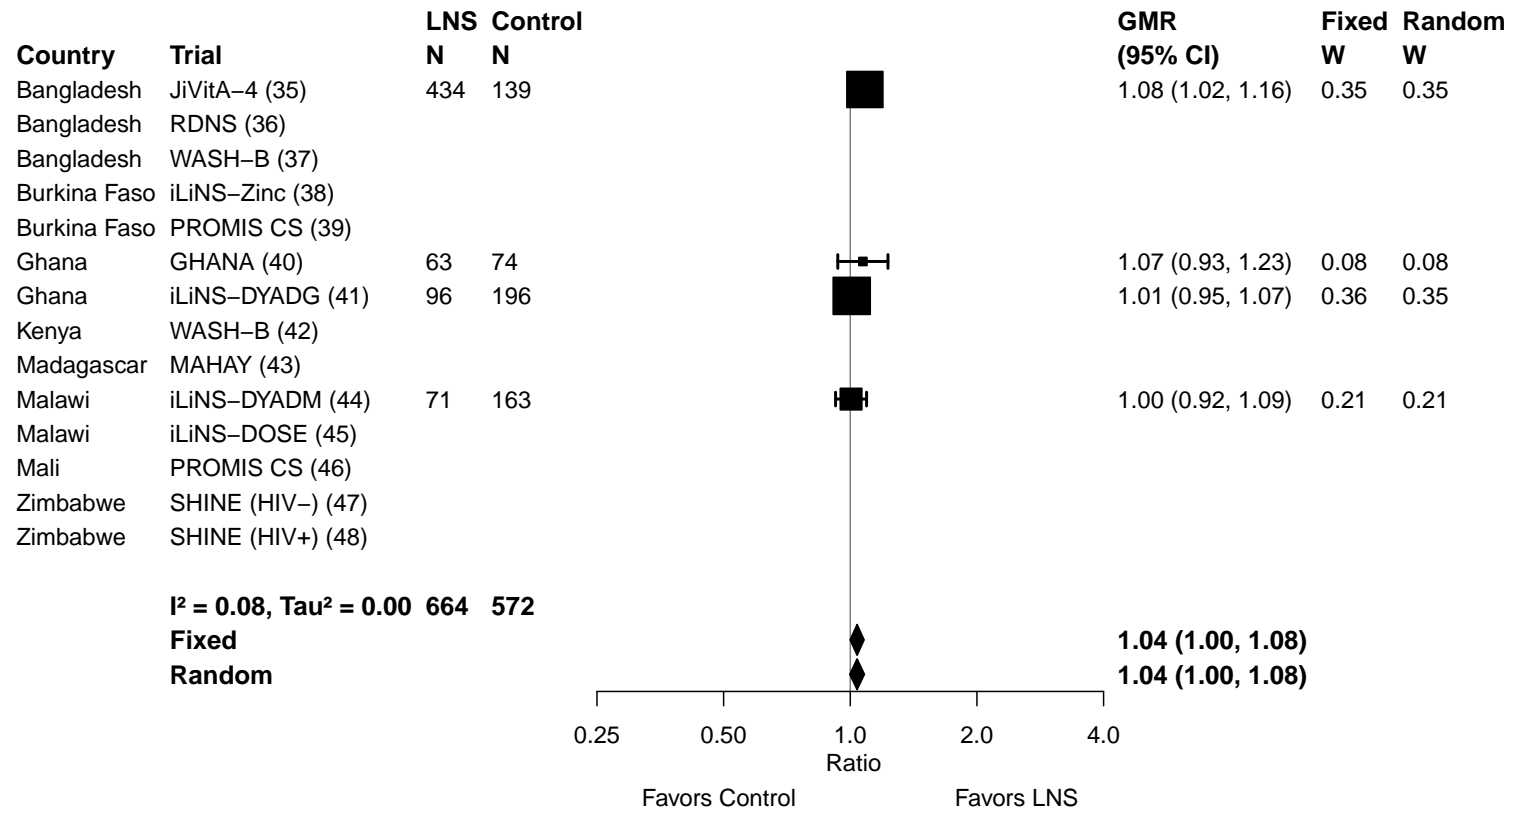

Supplemental figure 3S: Low vitamin A (retinol < 0.70 µmol/L) prevalence ratio

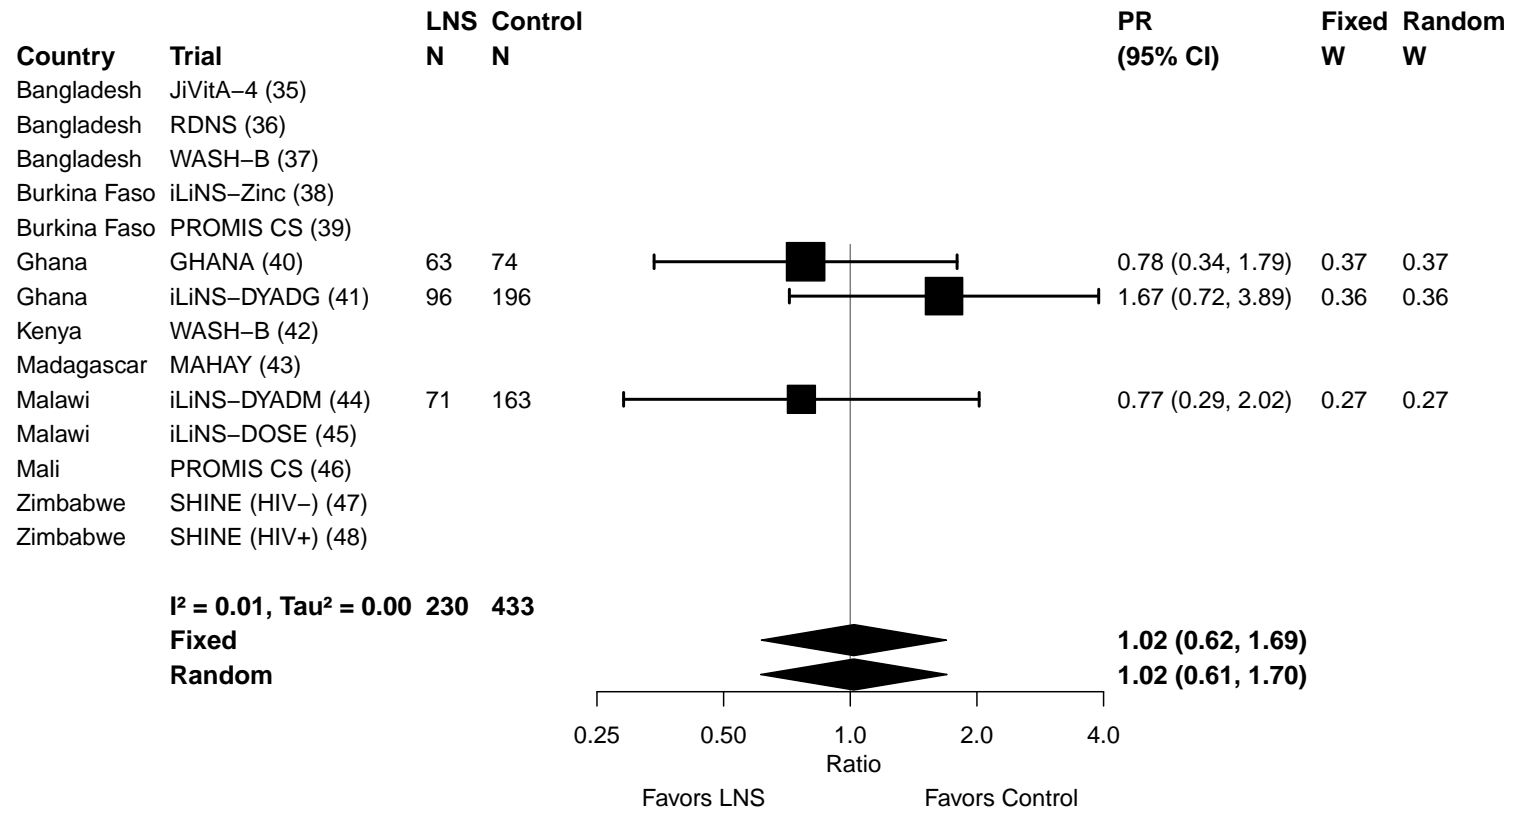

Supplemental figure 3T: Low vitamin A (retinol < 0.70 µmol/L) prevalence difference

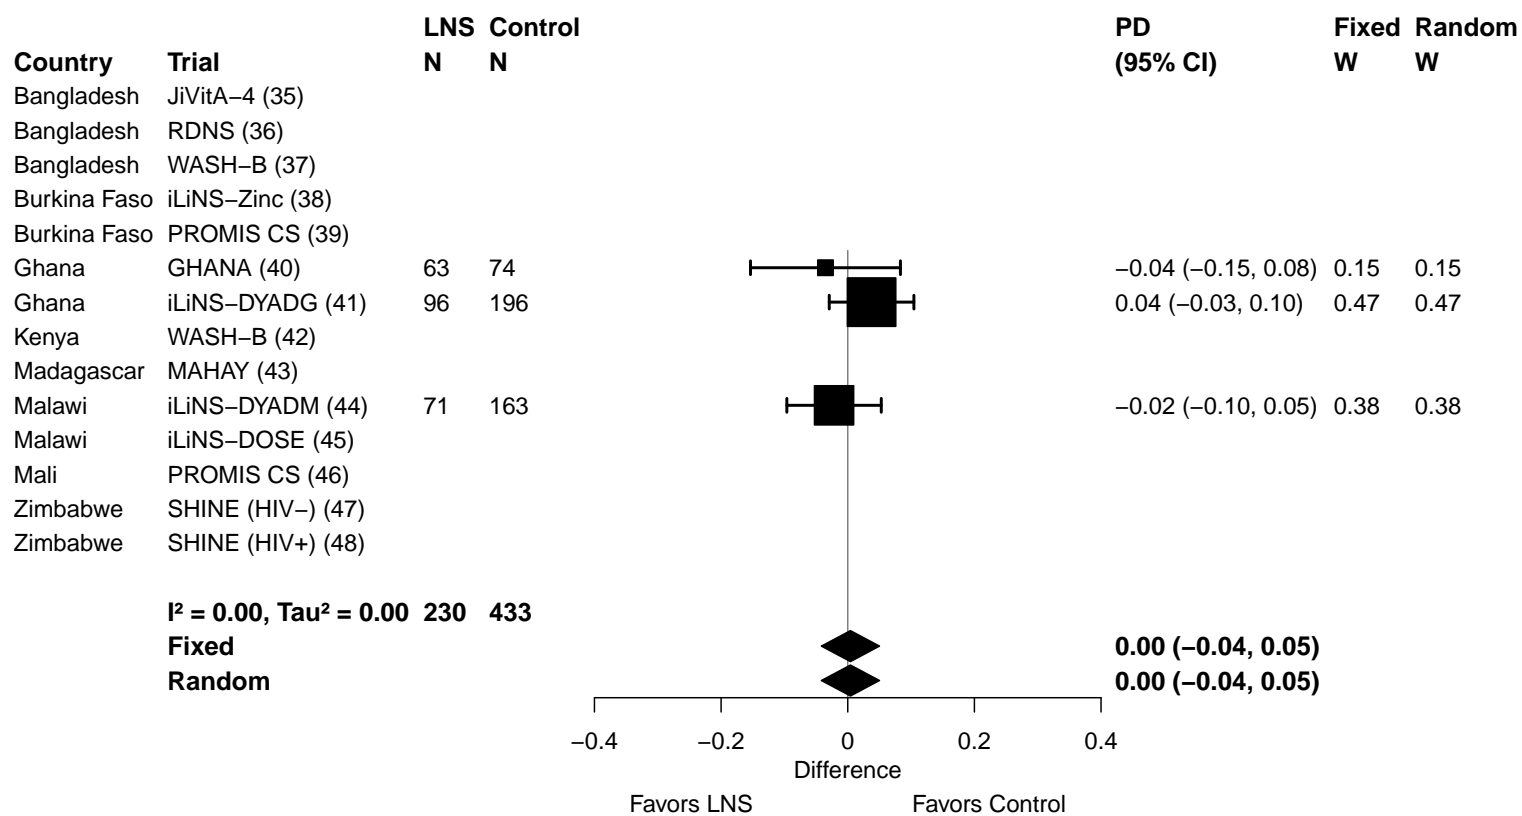

Supplemental figure 3U: Marginal vitamin A (retinol < 1.05 µmol/L) prevalence ratio

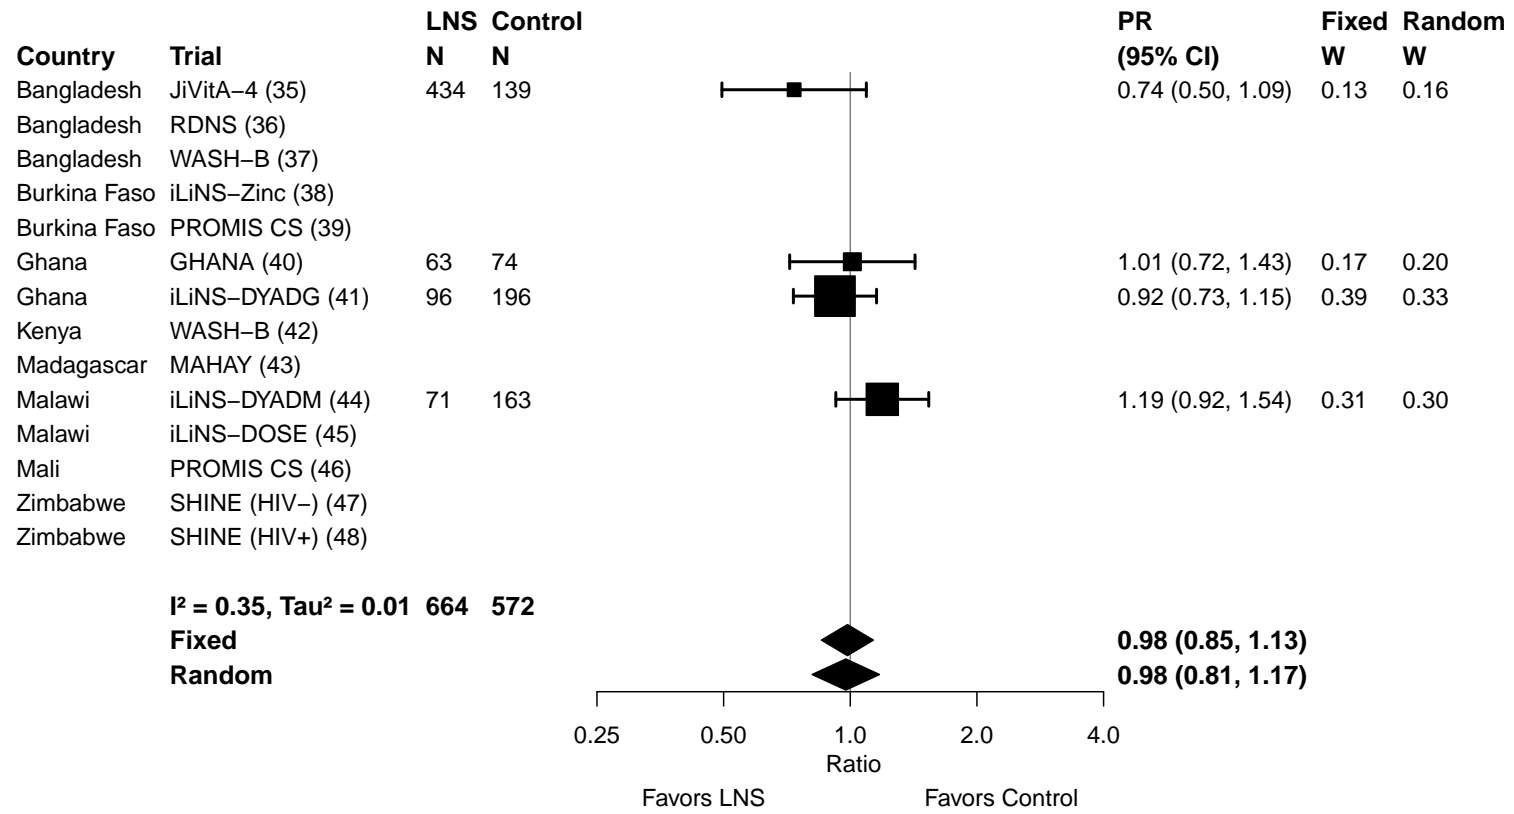



Supplemental figure 3V: Marginal vitamin A (retinol < 1.05 µmol/L) prevalence difference

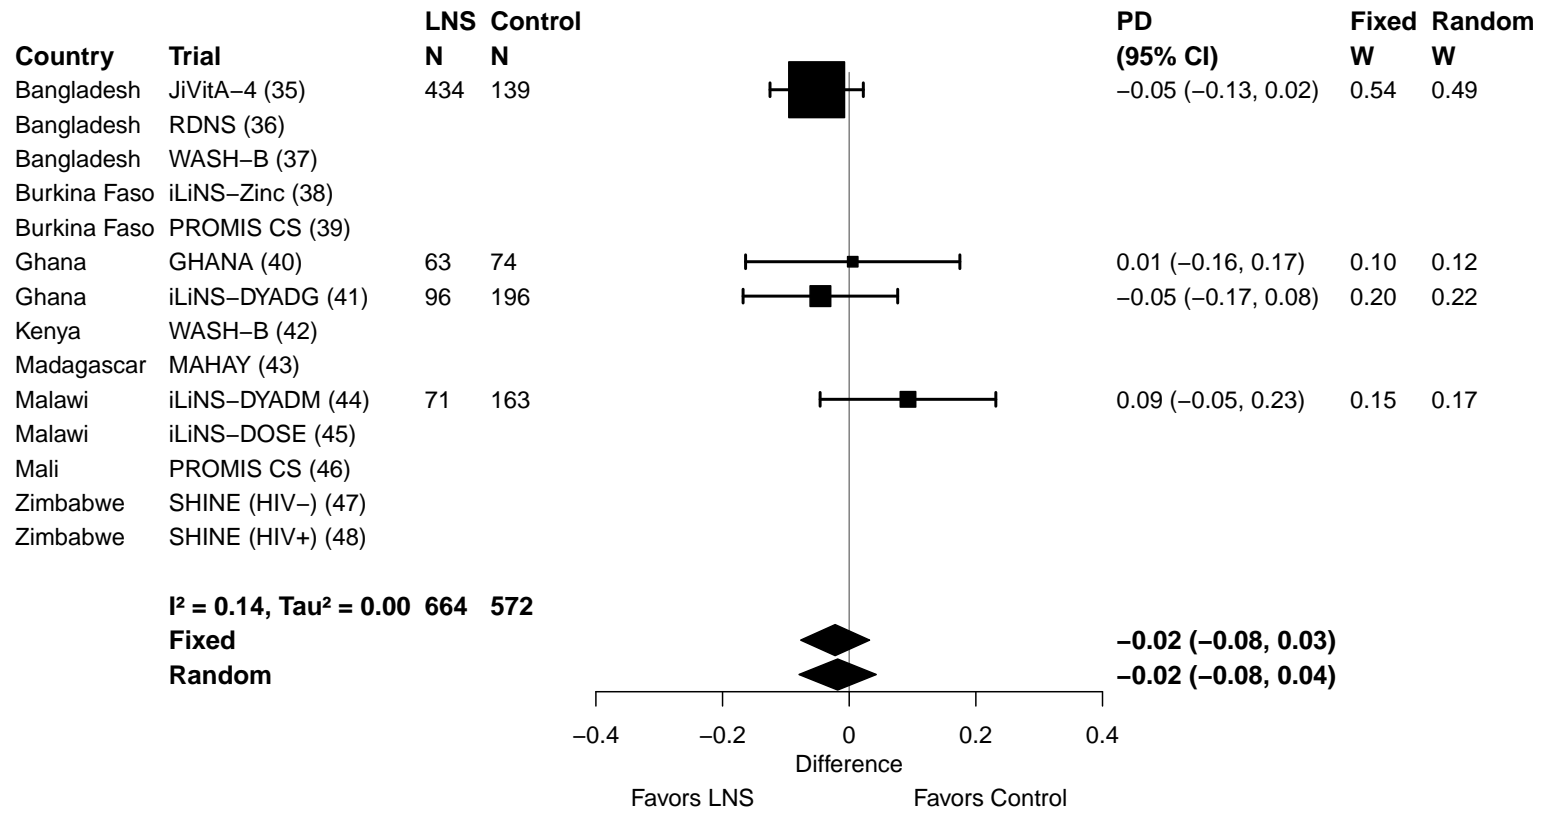

Supplemental figure 3W: Geometric mean ratio of retinol binding protein concentration

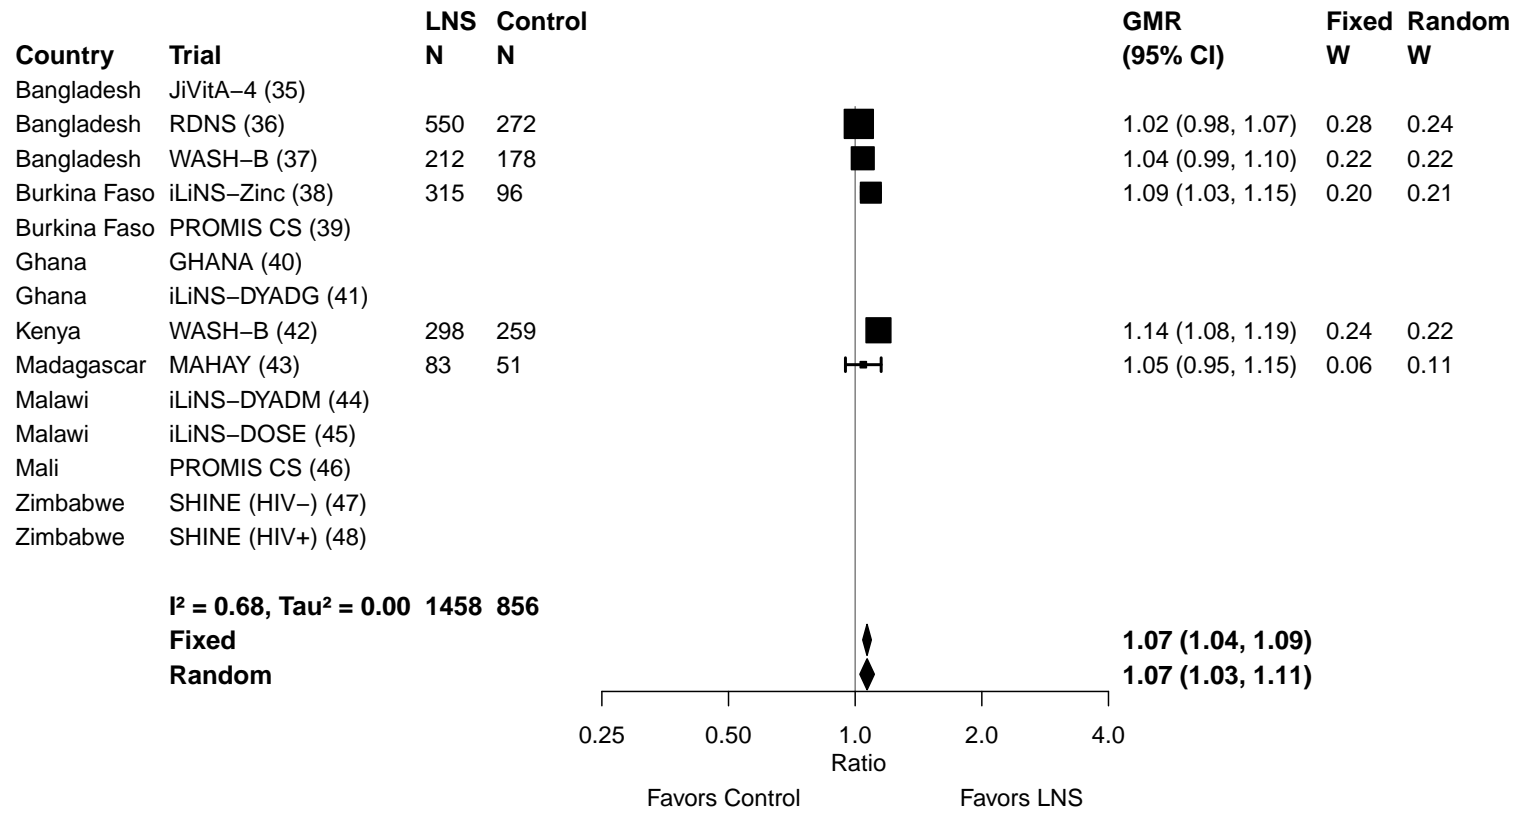

Supplemental figure 3X: Low vitamin A status (RBP < 0.70 µmol/L) prevalence ratio

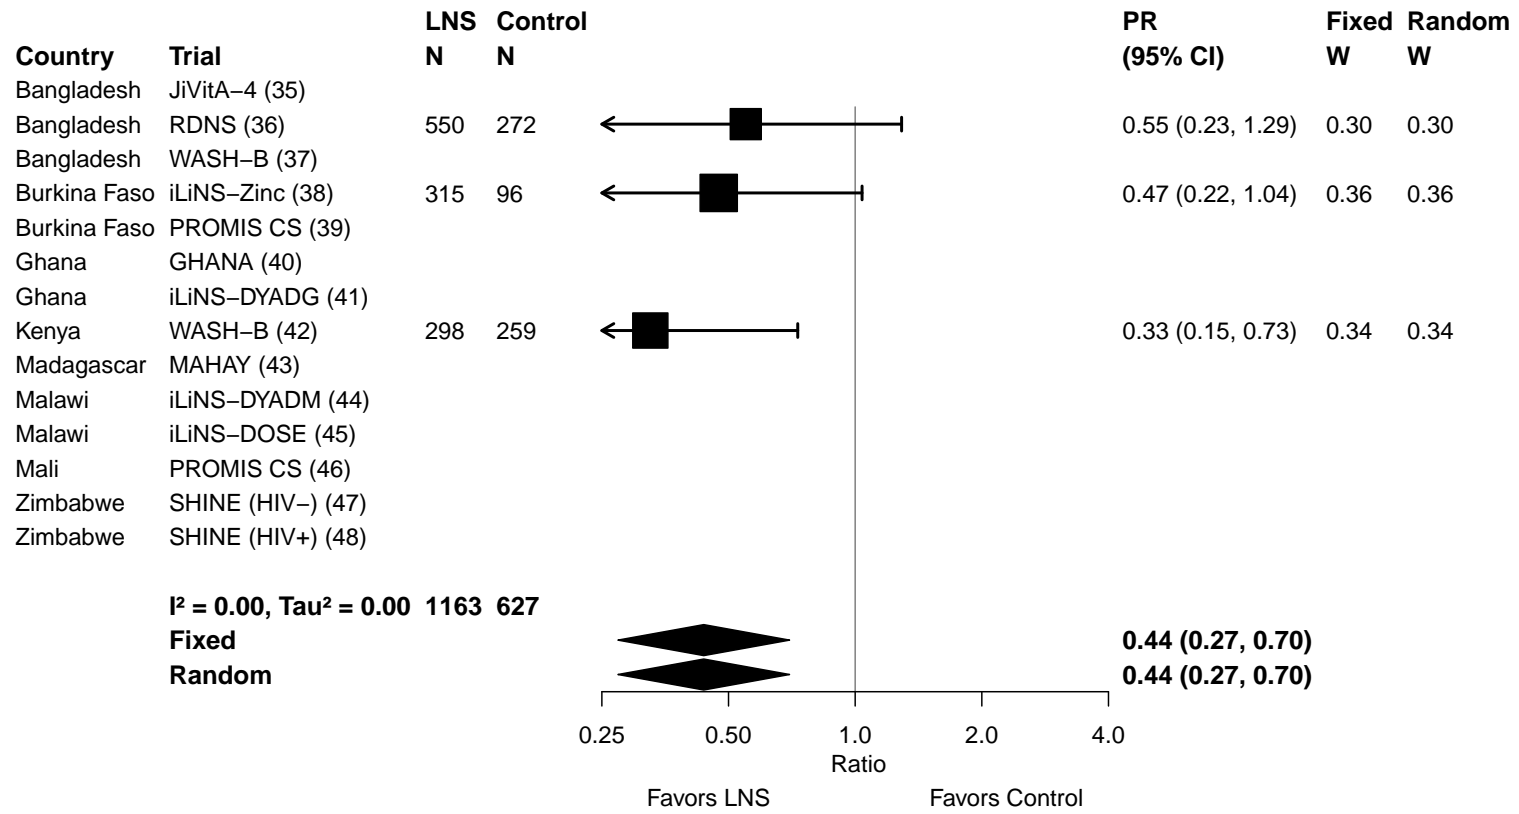

Supplemental figure 3Y: Low vitamin A status (RBP < 0.70 µmol/L) prevalence difference

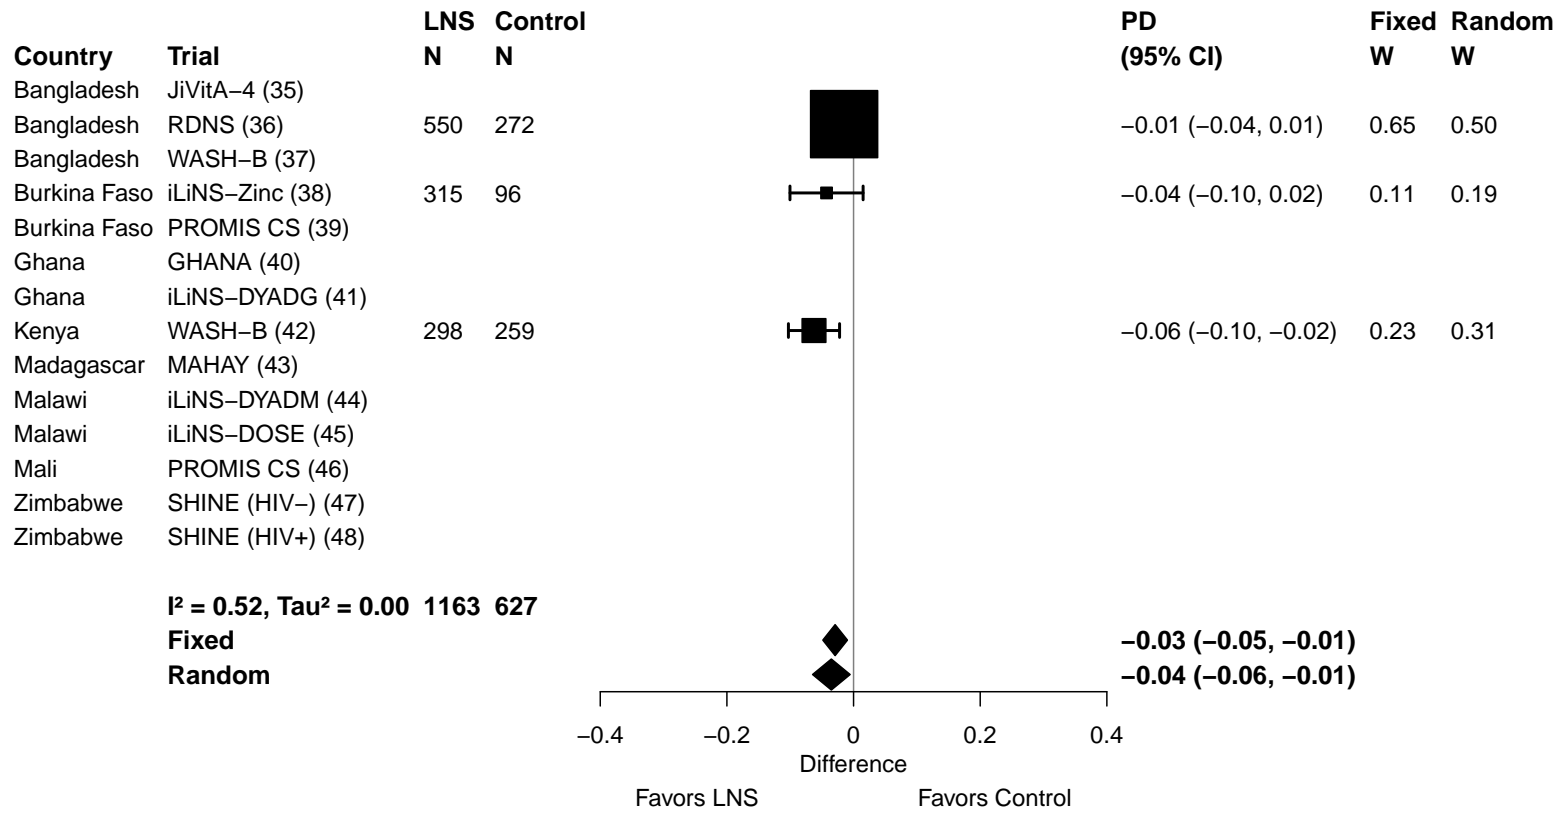

Supplemental figure 3Z: Marginal vitamin A status (RBP < 1.05 µmol/L) prevalence ratio

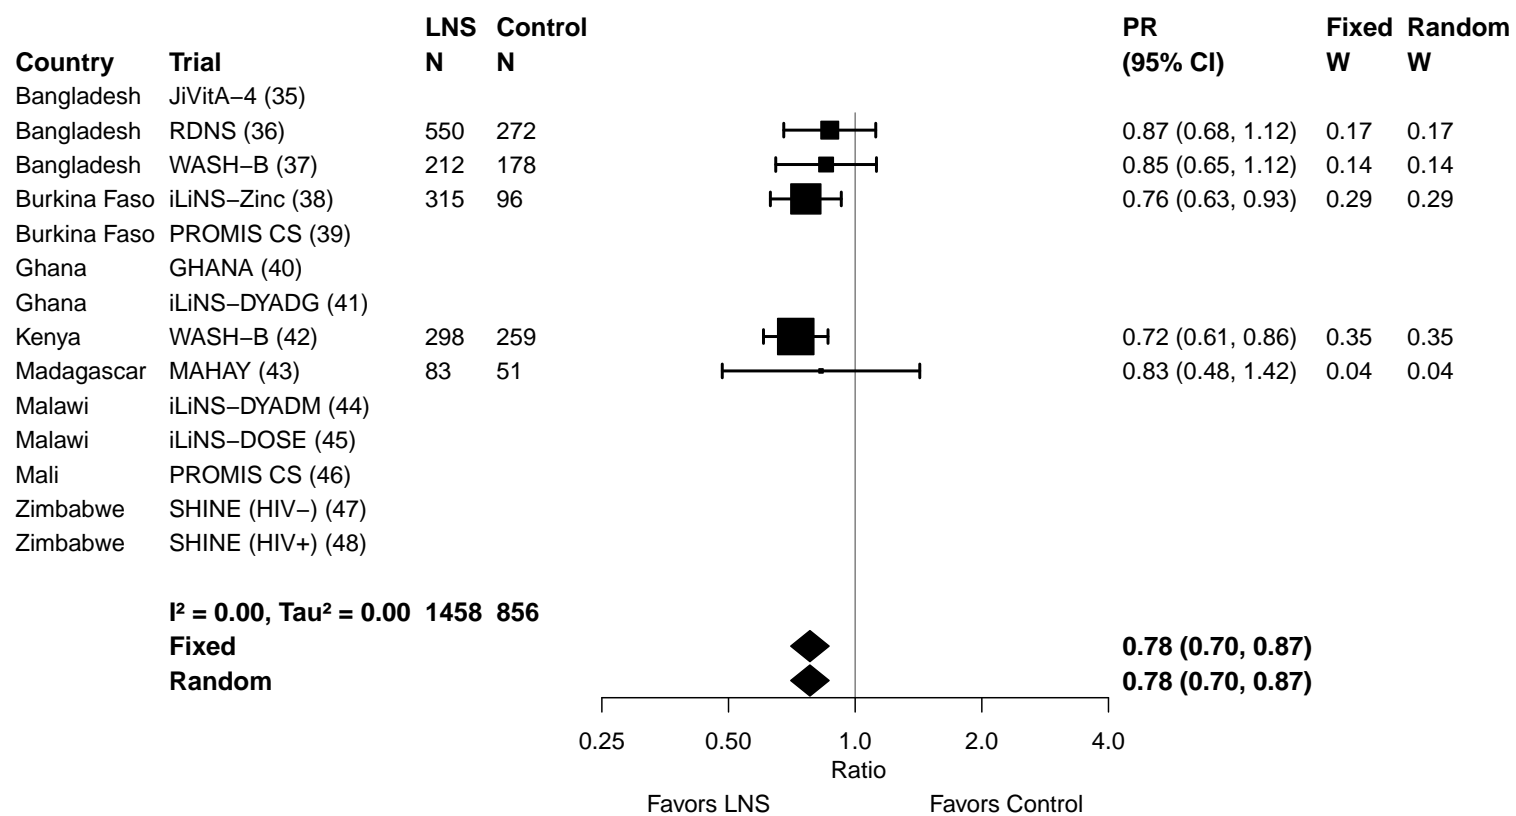

Supplemental figure 3AA: Marginal vitamin A status (RBP < 1.05 µmol/L) prevalence difference

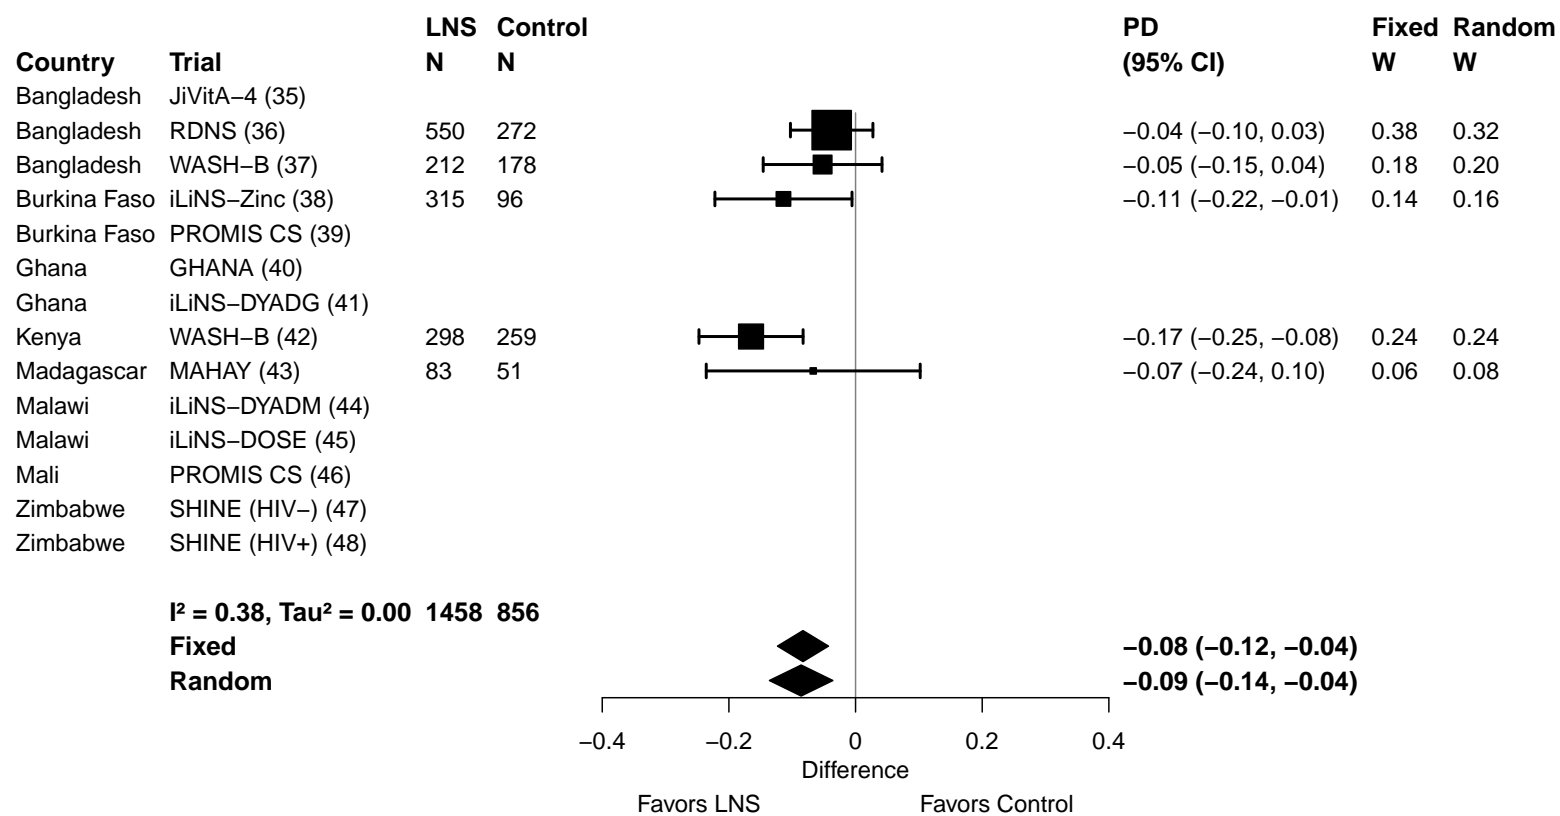

# Supplemental figure 4: Forest plots for effects of SQ-LNS on biochemical outcomes stratified by study-level effect modifiers

## Contents

|                                                                            |           |
|----------------------------------------------------------------------------|-----------|
| <b>Supplemental figure 4A: Mean difference in hemoglobin concentration</b> | <b>9</b>  |
| 4A1: Stratified by Geographic region . . . . .                             | 9         |
| 4A2: Stratified by Anemia burden . . . . .                                 | 10        |
| 4A3: Stratified by Malaria prevalence . . . . .                            | 11        |
| 4A4: Stratified by Inflammation burden . . . . .                           | 12        |
| 4A5: Stratified by Source water quality . . . . .                          | 13        |
| 4A6: Stratified by Sanitation . . . . .                                    | 14        |
| 4A7: Stratified by Supplement duration . . . . .                           | 15        |
| 4A8: Stratified by Iron dose . . . . .                                     | 16        |
| 4A9: Stratified by Frequency of contact . . . . .                          | 17        |
| 4A10: Stratified by Average SQ-LNS compliance . . . . .                    | 18        |
| <br>                                                                       |           |
| <b>Supplemental figure 4B: Anemia prevalence ratio</b>                     | <b>19</b> |
| 4B1: Stratified by Geographic region . . . . .                             | 19        |
| 4B2: Stratified by Anemia burden . . . . .                                 | 20        |
| 4B3: Stratified by Malaria prevalence . . . . .                            | 21        |
| 4B4: Stratified by Inflammation burden . . . . .                           | 22        |
| 4B5: Stratified by Source water quality . . . . .                          | 23        |
| 4B6: Stratified by Sanitation . . . . .                                    | 24        |
| 4B7: Stratified by Supplement duration . . . . .                           | 25        |
| 4B8: Stratified by Iron dose . . . . .                                     | 26        |
| 4B9: Stratified by Frequency of contact . . . . .                          | 27        |
| 4B10: Stratified by Average SQ-LNS compliance . . . . .                    | 28        |
| <br>                                                                       |           |
| <b>Supplemental figure 4C: Anemia prevalence difference</b>                | <b>29</b> |
| 4C1: Stratified by Geographic region . . . . .                             | 29        |
| 4C2: Stratified by Anemia burden . . . . .                                 | 30        |
| 4C3: Stratified by Malaria prevalence . . . . .                            | 31        |
| 4C4: Stratified by Inflammation burden . . . . .                           | 32        |
| 4C5: Stratified by Source water quality . . . . .                          | 33        |

|                                                                                    |           |
|------------------------------------------------------------------------------------|-----------|
| 4C6: Stratified by Sanitation . . . . .                                            | 34        |
| 4C7: Stratified by Supplement duration . . . . .                                   | 35        |
| 4C8: Stratified by Iron dose . . . . .                                             | 36        |
| 4C9: Stratified by Frequency of contact . . . . .                                  | 37        |
| 4C10: Stratified by Average SQ-LNS compliance . . . . .                            | 38        |
| <b>Supplemental figure 4D: Moderate-to-severe anemia prevalence ratio</b>          | <b>39</b> |
| 4D1: Stratified by Geographic region (insufficient comparisons) . . . . .          | 39        |
| 4D2: Stratified by Anemia burden . . . . .                                         | 40        |
| 4D3: Stratified by Malaria prevalence . . . . .                                    | 41        |
| 4D4: Stratified by Inflammation burden . . . . .                                   | 42        |
| 4D5: Stratified by Source water quality . . . . .                                  | 43        |
| 4D6: Stratified by Sanitation . . . . .                                            | 44        |
| 4D7: Stratified by Supplement duration . . . . .                                   | 45        |
| 4D8: Stratified by Iron dose . . . . .                                             | 46        |
| 4D9: Stratified by Frequency of contact . . . . .                                  | 47        |
| 4D10: Stratified by Average SQ-LNS compliance . . . . .                            | 48        |
| <b>Supplemental figure 4E: Moderate-to-severe anemia prevalence difference</b>     | <b>49</b> |
| 4E1: Stratified by Geographic region (insufficient comparisons) . . . . .          | 49        |
| 4E2: Stratified by Anemia burden . . . . .                                         | 50        |
| 4E3: Stratified by Malaria prevalence . . . . .                                    | 51        |
| 4E4: Stratified by Inflammation burden . . . . .                                   | 52        |
| 4E5: Stratified by Source water quality . . . . .                                  | 53        |
| 4E6: Stratified by Sanitation . . . . .                                            | 54        |
| 4E7: Stratified by Supplement duration . . . . .                                   | 55        |
| 4E8: Stratified by Iron dose . . . . .                                             | 56        |
| 4E9: Stratified by Frequency of contact . . . . .                                  | 57        |
| 4E10: Stratified by Average SQ-LNS compliance . . . . .                            | 58        |
| <b>Supplemental figure 4F: Geometric mean ratio of ferritin concentration</b>      | <b>59</b> |
| 4F1: Stratified by Geographic region . . . . .                                     | 59        |
| 4F2: Stratified by Anemia burden (insufficient comparisons) . . . . .              | 60        |
| 4F3: Stratified by Malaria prevalence (insufficient comparisons) . . . . .         | 61        |
| 4F4: Stratified by Inflammation burden (insufficient comparisons) . . . . .        | 62        |
| 4F5: Stratified by Source water quality . . . . .                                  | 63        |
| 4F6: Stratified by Sanitation . . . . .                                            | 64        |
| 4F7: Stratified by Supplement duration . . . . .                                   | 65        |
| 4F8: Stratified by Iron dose . . . . .                                             | 66        |
| 4F9: Stratified by Frequency of contact . . . . .                                  | 67        |
| 4F10: Stratified by Average SQ-LNS compliance (insufficient comparisons) . . . . . | 68        |



|                                                                                              |           |
|----------------------------------------------------------------------------------------------|-----------|
| <b>Supplemental figure 4G: Iron deficiency (ferritin &lt; 12 µg/L) prevalence ratio</b>      | <b>69</b> |
| 4G1: Stratified by Geographic region . . . . .                                               | 69        |
| 4G2: Stratified by Anemia burden (insufficient comparisons) . . . . .                        | 70        |
| 4G3: Stratified by Malaria prevalence (insufficient comparisons) . . . . .                   | 71        |
| 4G4: Stratified by Inflammation burden (insufficient comparisons) . . . . .                  | 72        |
| 4G5: Stratified by Source water quality . . . . .                                            | 73        |
| 4G6: Stratified by Sanitation . . . . .                                                      | 74        |
| 4G7: Stratified by Supplement duration . . . . .                                             | 75        |
| 4G8: Stratified by Iron dose . . . . .                                                       | 76        |
| 4G9: Stratified by Frequency of contact . . . . .                                            | 77        |
| 4G10: Stratified by Average SQ-LNS compliance (insufficient comparisons) . . . . .           | 78        |
| <b>Supplemental figure 4H: Iron deficiency (ferritin &lt; 12 µg/L) prevalence difference</b> | <b>79</b> |
| 4H1: Stratified by Geographic region . . . . .                                               | 79        |
| 4H2: Stratified by Anemia burden (insufficient comparisons) . . . . .                        | 80        |
| 4H3: Stratified by Malaria prevalence (insufficient comparisons) . . . . .                   | 81        |
| 4H4: Stratified by Inflammation burden (insufficient comparisons) . . . . .                  | 82        |
| 4H5: Stratified by Source water quality . . . . .                                            | 83        |
| 4H6: Stratified by Sanitation . . . . .                                                      | 84        |
| 4H7: Stratified by Supplement duration . . . . .                                             | 85        |
| 4H8: Stratified by Iron dose . . . . .                                                       | 86        |
| 4H9: Stratified by Frequency of contact . . . . .                                            | 87        |
| 4H10: Stratified by Average SQ-LNS compliance (insufficient comparisons) . . . . .           | 88        |
| <b>Supplemental figure 4I: Iron deficiency anemia prevalence ratio</b>                       | <b>89</b> |
| 4I1: Stratified by Geographic region (insufficient comparisons) . . . . .                    | 89        |
| 4I2: Stratified by Anemia burden (insufficient comparisons) . . . . .                        | 90        |
| 4I3: Stratified by Malaria prevalence (insufficient comparisons) . . . . .                   | 91        |
| 4I4: Stratified by Inflammation burden (insufficient comparisons) . . . . .                  | 92        |
| 4I5: Stratified by Source water quality . . . . .                                            | 93        |
| 4I6: Stratified by Sanitation . . . . .                                                      | 94        |
| 4I7: Stratified by Supplement duration (insufficient comparisons) . . . . .                  | 95        |
| 4I8: Stratified by Iron dose . . . . .                                                       | 96        |
| 4I9: Stratified by Frequency of contact . . . . .                                            | 97        |
| 4I10: Stratified by Average SQ-LNS compliance (insufficient comparisons) . . . . .           | 98        |
| <b>Supplemental figure 4J: Iron deficiency anemia prevalence difference</b>                  | <b>99</b> |
| 4J1: Stratified by Geographic region (insufficient comparisons) . . . . .                    | 99        |
| 4J2: Stratified by Anemia burden (insufficient comparisons) . . . . .                        | 100       |
| 4J3: Stratified by Malaria prevalence (insufficient comparisons) . . . . .                   | 101       |
| 4J4: Stratified by Inflammation burden (insufficient comparisons) . . . . .                  | 102       |
| 4J5: Stratified by Source water quality . . . . .                                            | 103       |

|                                                                                                   |            |
|---------------------------------------------------------------------------------------------------|------------|
| 4J6: Stratified by Sanitation . . . . .                                                           | 104        |
| 4J7: Stratified by Supplement duration (insufficient comparisons) . . . . .                       | 105        |
| 4J8: Stratified by Iron dose . . . . .                                                            | 106        |
| 4J9: Stratified by Frequency of contact . . . . .                                                 | 107        |
| 4J10: Stratified by Average SQ-LNS compliance (insufficient comparisons) . . . . .                | 108        |
| <b>Supplemental figure 4K: Geometric mean ratio of soluble transferrin receptor concentration</b> | <b>109</b> |
| 4K1: Stratified by Geographic region (insufficient comparisons) . . . . .                         | 109        |
| 4K2: Stratified by Anemia burden (insufficient comparisons) . . . . .                             | 110        |
| 4K3: Stratified by Malaria prevalence (insufficient comparisons) . . . . .                        | 111        |
| 4K4: Stratified by Inflammation burden (insufficient comparisons) . . . . .                       | 112        |
| 4K5: Stratified by Source water quality . . . . .                                                 | 113        |
| 4K6: Stratified by Sanitation . . . . .                                                           | 114        |
| 4K7: Stratified by Supplement duration . . . . .                                                  | 115        |
| 4K8: Stratified by Iron dose (insufficient comparisons) . . . . .                                 | 116        |
| 4K9: Stratified by Frequency of contact . . . . .                                                 | 117        |
| 4K10: Stratified by Average SQ-LNS compliance (insufficient comparisons) . . . . .                | 118        |
| <b>Supplemental figure 4L: Elevated soluble transferrin receptor prevalence ratio</b>             | <b>119</b> |
| 4L1: Stratified by Geographic region (insufficient comparisons) . . . . .                         | 119        |
| 4L2: Stratified by Anemia burden (insufficient comparisons) . . . . .                             | 120        |
| 4L3: Stratified by Malaria prevalence (insufficient comparisons) . . . . .                        | 121        |
| 4L4: Stratified by Inflammation burden (insufficient comparisons) . . . . .                       | 122        |
| 4L5: Stratified by Source water quality . . . . .                                                 | 123        |
| 4L6: Stratified by Sanitation . . . . .                                                           | 124        |
| 4L7: Stratified by Supplement duration . . . . .                                                  | 125        |
| 4L8: Stratified by Iron dose (insufficient comparisons) . . . . .                                 | 126        |
| 4L9: Stratified by Frequency of contact . . . . .                                                 | 127        |
| 4L10: Stratified by Average SQ-LNS compliance (insufficient comparisons) . . . . .                | 128        |
| <b>Supplemental figure 4M: Elevated soluble transferrin receptor prevalence difference</b>        | <b>129</b> |
| 4M1: Stratified by Geographic region (insufficient comparisons) . . . . .                         | 129        |
| 4M2: Stratified by Anemia burden (insufficient comparisons) . . . . .                             | 130        |
| 4M3: Stratified by Malaria prevalence (insufficient comparisons) . . . . .                        | 131        |
| 4M4: Stratified by Inflammation burden (insufficient comparisons) . . . . .                       | 132        |
| 4M5: Stratified by Source water quality . . . . .                                                 | 133        |
| 4M6: Stratified by Sanitation . . . . .                                                           | 134        |
| 4M7: Stratified by Supplement duration . . . . .                                                  | 135        |
| 4M8: Stratified by Iron dose (insufficient comparisons) . . . . .                                 | 136        |
| 4M9: Stratified by Frequency of contact . . . . .                                                 | 137        |
| 4M10: Stratified by Average SQ-LNS compliance (insufficient comparisons) . . . . .                | 138        |

|                                                                                          |            |
|------------------------------------------------------------------------------------------|------------|
| <b>Supplemental figure 4N: Geometric mean ratio of zinc protoporphyrin concentration</b> | <b>139</b> |
| 4N1: Stratified by Geographic region (insufficient comparisons)                          | 139        |
| 4N2: Stratified by Anemia burden (insufficient comparisons)                              | 140        |
| 4N3: Stratified by Malaria prevalence (insufficient comparisons)                         | 141        |
| 4N4: Stratified by Inflammation burden (insufficient comparisons)                        | 142        |
| 4N5: Stratified by Source water quality (insufficient comparisons)                       | 143        |
| 4N6: Stratified by Sanitation (insufficient comparisons)                                 | 144        |
| 4N7: Stratified by Supplement duration (insufficient comparisons)                        | 145        |
| 4N8: Stratified by Iron dose (insufficient comparisons)                                  | 146        |
| 4N9: Stratified by Frequency of contact (insufficient comparisons)                       | 147        |
| 4N10: Stratified by Average SQ-LNS compliance (insufficient comparisons)                 | 148        |
| <b>Supplemental figure 4O: Elevated zinc protoporphyrin prevalence ratio</b>             | <b>149</b> |
| 4O1: Stratified by Geographic region (insufficient comparisons)                          | 149        |
| 4O2: Stratified by Anemia burden (insufficient comparisons)                              | 150        |
| 4O3: Stratified by Malaria prevalence (insufficient comparisons)                         | 151        |
| 4O4: Stratified by Inflammation burden (insufficient comparisons)                        | 152        |
| 4O5: Stratified by Source water quality (insufficient comparisons)                       | 153        |
| 4O6: Stratified by Sanitation (insufficient comparisons)                                 | 154        |
| 4O7: Stratified by Supplement duration (insufficient comparisons)                        | 155        |
| 4O8: Stratified by Iron dose (insufficient comparisons)                                  | 156        |
| 4O9: Stratified by Frequency of contact (insufficient comparisons)                       | 157        |
| 4O10: Stratified by Average SQ-LNS compliance (insufficient comparisons)                 | 158        |
| <b>Supplemental figure 4P: Elevated zinc protoporphyrin prevalence difference</b>        | <b>159</b> |
| 4P1: Stratified by Geographic region (insufficient comparisons)                          | 159        |
| 4P2: Stratified by Anemia burden (insufficient comparisons)                              | 160        |
| 4P3: Stratified by Malaria prevalence (insufficient comparisons)                         | 161        |
| 4P4: Stratified by Inflammation burden (insufficient comparisons)                        | 162        |
| 4P5: Stratified by Source water quality (insufficient comparisons)                       | 163        |
| 4P6: Stratified by Sanitation (insufficient comparisons)                                 | 164        |
| 4P7: Stratified by Supplement duration (insufficient comparisons)                        | 165        |
| 4P8: Stratified by Iron dose (insufficient comparisons)                                  | 166        |
| 4P9: Stratified by Frequency of contact (insufficient comparisons)                       | 167        |
| 4P10: Stratified by Average SQ-LNS compliance (insufficient comparisons)                 | 168        |
| <b>Supplemental figure 4Q: Geometric mean ratio of plasma zinc concentration</b>         | <b>169</b> |
| 4Q1: Stratified by Geographic region (insufficient comparisons)                          | 169        |
| 4Q2: Stratified by Anemia burden (insufficient comparisons)                              | 170        |
| 4Q3: Stratified by Malaria prevalence (insufficient comparisons)                         | 171        |
| 4Q4: Stratified by Inflammation burden (insufficient comparisons)                        | 172        |
| 4Q5: Stratified by Source water quality (insufficient comparisons)                       | 173        |

|                                                                                               |            |
|-----------------------------------------------------------------------------------------------|------------|
| 4Q6: Stratified by Sanitation (insufficient comparisons)                                      | 174        |
| 4Q7: Stratified by Supplement duration (insufficient comparisons)                             | 175        |
| 4Q8: Stratified by Iron dose (insufficient comparisons)                                       | 176        |
| 4Q9: Stratified by Frequency of contact (insufficient comparisons)                            | 177        |
| 4Q10: Stratified by Average SQ-LNS compliance (insufficient comparisons)                      | 178        |
| <b>Supplemental figure 4R: Geometric mean ratio of retinol concentration</b>                  | <b>179</b> |
| 4R1: Stratified by Geographic region (insufficient comparisons)                               | 179        |
| 4R2: Stratified by Anemia burden (insufficient comparisons)                                   | 180        |
| 4R3: Stratified by Malaria prevalence (insufficient comparisons)                              | 181        |
| 4R4: Stratified by Inflammation burden (insufficient comparisons)                             | 182        |
| 4R5: Stratified by Source water quality (insufficient comparisons)                            | 183        |
| 4R6: Stratified by Sanitation (insufficient comparisons)                                      | 184        |
| 4R7: Stratified by Supplement duration (insufficient comparisons)                             | 185        |
| 4R8: Stratified by Iron dose (insufficient comparisons)                                       | 186        |
| 4R9: Stratified by Frequency of contact (insufficient comparisons)                            | 187        |
| 4R10: Stratified by Average SQ-LNS compliance (insufficient comparisons)                      | 188        |
| <b>Supplemental figure 4S: Low vitamin A (retinol &lt; 0.70 µmol/L) prevalence ratio</b>      | <b>189</b> |
| 4S1: Stratified by Geographic region (insufficient comparisons)                               | 189        |
| 4S2: Stratified by Anemia burden (insufficient comparisons)                                   | 190        |
| 4S3: Stratified by Malaria prevalence (insufficient comparisons)                              | 191        |
| 4S4: Stratified by Inflammation burden (insufficient comparisons)                             | 192        |
| 4S5: Stratified by Source water quality (insufficient comparisons)                            | 193        |
| 4S6: Stratified by Sanitation (insufficient comparisons)                                      | 194        |
| 4S7: Stratified by Supplement duration (insufficient comparisons)                             | 195        |
| 4S8: Stratified by Iron dose (insufficient comparisons)                                       | 196        |
| 4S9: Stratified by Frequency of contact (insufficient comparisons)                            | 197        |
| 4S10: Stratified by Average SQ-LNS compliance (insufficient comparisons)                      | 198        |
| <b>Supplemental figure 4T: Low vitamin A (retinol &lt; 0.70 µmol/L) prevalence difference</b> | <b>199</b> |
| 4T1: Stratified by Geographic region (insufficient comparisons)                               | 199        |
| 4T2: Stratified by Anemia burden (insufficient comparisons)                                   | 200        |
| 4T3: Stratified by Malaria prevalence (insufficient comparisons)                              | 201        |
| 4T4: Stratified by Inflammation burden (insufficient comparisons)                             | 202        |
| 4T5: Stratified by Source water quality (insufficient comparisons)                            | 203        |
| 4T6: Stratified by Sanitation (insufficient comparisons)                                      | 204        |
| 4T7: Stratified by Supplement duration (insufficient comparisons)                             | 205        |
| 4T8: Stratified by Iron dose (insufficient comparisons)                                       | 206        |
| 4T9: Stratified by Frequency of contact (insufficient comparisons)                            | 207        |
| 4T10: Stratified by Average SQ-LNS compliance (insufficient comparisons)                      | 208        |

|                                                                                                    |            |
|----------------------------------------------------------------------------------------------------|------------|
| <b>Supplemental figure 4U: Marginal vitamin A (retinol &lt; 1.05 µmol/L) prevalence ratio</b>      | <b>209</b> |
| 4U1: Stratified by Geographic region (insufficient comparisons)                                    | 209        |
| 4U2: Stratified by Anemia burden (insufficient comparisons)                                        | 210        |
| 4U3: Stratified by Malaria prevalence (insufficient comparisons)                                   | 211        |
| 4U4: Stratified by Inflammation burden (insufficient comparisons)                                  | 212        |
| 4U5: Stratified by Source water quality (insufficient comparisons)                                 | 213        |
| 4U6: Stratified by Sanitation (insufficient comparisons)                                           | 214        |
| 4U7: Stratified by Supplement duration (insufficient comparisons)                                  | 215        |
| 4U8: Stratified by Iron dose (insufficient comparisons)                                            | 216        |
| 4U9: Stratified by Frequency of contact (insufficient comparisons)                                 | 217        |
| 4U10: Stratified by Average SQ-LNS compliance (insufficient comparisons)                           | 218        |
| <b>Supplemental figure 4V: Marginal vitamin A (retinol &lt; 1.05 µmol/L) prevalence difference</b> | <b>219</b> |
| 4V1: Stratified by Geographic region (insufficient comparisons)                                    | 219        |
| 4V2: Stratified by Anemia burden (insufficient comparisons)                                        | 220        |
| 4V3: Stratified by Malaria prevalence (insufficient comparisons)                                   | 221        |
| 4V4: Stratified by Inflammation burden (insufficient comparisons)                                  | 222        |
| 4V5: Stratified by Source water quality (insufficient comparisons)                                 | 223        |
| 4V6: Stratified by Sanitation (insufficient comparisons)                                           | 224        |
| 4V7: Stratified by Supplement duration (insufficient comparisons)                                  | 225        |
| 4V8: Stratified by Iron dose (insufficient comparisons)                                            | 226        |
| 4V9: Stratified by Frequency of contact (insufficient comparisons)                                 | 227        |
| 4V10: Stratified by Average SQ-LNS compliance (insufficient comparisons)                           | 228        |
| <b>Supplemental figure 4W: Geometric mean ratio of retinol binding protein concentration</b>       | <b>229</b> |
| 4W1: Stratified by Geographic region (insufficient comparisons)                                    | 229        |
| 4W2: Stratified by Anemia burden (insufficient comparisons)                                        | 230        |
| 4W3: Stratified by Malaria prevalence (insufficient comparisons)                                   | 231        |
| 4W4: Stratified by Inflammation burden (insufficient comparisons)                                  | 232        |
| 4W5: Stratified by Source water quality (insufficient comparisons)                                 | 233        |
| 4W6: Stratified by Sanitation (insufficient comparisons)                                           | 234        |
| 4W7: Stratified by Supplement duration (insufficient comparisons)                                  | 235        |
| 4W8: Stratified by Iron dose (insufficient comparisons)                                            | 236        |
| 4W9: Stratified by Frequency of contact (insufficient comparisons)                                 | 237        |
| 4W10: Stratified by Average SQ-LNS compliance (insufficient comparisons)                           | 238        |
| <b>Supplemental figure 4X: Low vitamin A status (RBP &lt; 0.70 µmol/L) prevalence ratio</b>        | <b>239</b> |
| 4X1: Stratified by Geographic region (insufficient comparisons)                                    | 239        |
| 4X2: Stratified by Anemia burden (insufficient comparisons)                                        | 240        |
| 4X3: Stratified by Malaria prevalence (insufficient comparisons)                                   | 241        |
| 4X4: Stratified by Inflammation burden (insufficient comparisons)                                  | 242        |
| 4X5: Stratified by Source water quality (insufficient comparisons)                                 | 243        |

|                                                                                                        |            |
|--------------------------------------------------------------------------------------------------------|------------|
| 4X6: Stratified by Sanitation (insufficient comparisons)                                               | 244        |
| 4X7: Stratified by Supplement duration (insufficient comparisons)                                      | 245        |
| 4X8: Stratified by Iron dose (insufficient comparisons)                                                | 246        |
| 4X9: Stratified by Frequency of contact (insufficient comparisons)                                     | 247        |
| 4X10: Stratified by Average SQ-LNS compliance (insufficient comparisons)                               | 248        |
| <b>Supplemental figure 4Y: Low vitamin A status (RBP &lt; 0.70 µmol/L) prevalence difference</b>       | <b>249</b> |
| 4Y1: Stratified by Geographic region (insufficient comparisons)                                        | 249        |
| 4Y2: Stratified by Anemia burden (insufficient comparisons)                                            | 250        |
| 4Y3: Stratified by Malaria prevalence (insufficient comparisons)                                       | 251        |
| 4Y4: Stratified by Inflammation burden (insufficient comparisons)                                      | 252        |
| 4Y5: Stratified by Source water quality (insufficient comparisons)                                     | 253        |
| 4Y6: Stratified by Sanitation (insufficient comparisons)                                               | 254        |
| 4Y7: Stratified by Supplement duration (insufficient comparisons)                                      | 255        |
| 4Y8: Stratified by Iron dose (insufficient comparisons)                                                | 256        |
| 4Y9: Stratified by Frequency of contact (insufficient comparisons)                                     | 257        |
| 4Y10: Stratified by Average SQ-LNS compliance (insufficient comparisons)                               | 258        |
| <b>Supplemental figure 4Z: Marginal vitamin A status (RBP &lt; 1.05 µmol/L) prevalence ratio</b>       | <b>259</b> |
| 4Z1: Stratified by Geographic region (insufficient comparisons)                                        | 259        |
| 4Z2: Stratified by Anemia burden (insufficient comparisons)                                            | 260        |
| 4Z3: Stratified by Malaria prevalence (insufficient comparisons)                                       | 261        |
| 4Z4: Stratified by Inflammation burden (insufficient comparisons)                                      | 262        |
| 4Z5: Stratified by Source water quality (insufficient comparisons)                                     | 263        |
| 4Z6: Stratified by Sanitation (insufficient comparisons)                                               | 264        |
| 4Z7: Stratified by Supplement duration (insufficient comparisons)                                      | 265        |
| 4Z8: Stratified by Iron dose (insufficient comparisons)                                                | 266        |
| 4Z9: Stratified by Frequency of contact (insufficient comparisons)                                     | 267        |
| 4Z10: Stratified by Average SQ-LNS compliance (insufficient comparisons)                               | 268        |
| <b>Supplemental figure 4AA: Marginal vitamin A status (RBP &lt; 1.05 µmol/L) prevalence difference</b> | <b>269</b> |
| 4AA1: Stratified by Geographic region (insufficient comparisons)                                       | 269        |
| 4AA2: Stratified by Anemia burden (insufficient comparisons)                                           | 270        |
| 4AA3: Stratified by Malaria prevalence (insufficient comparisons)                                      | 271        |
| 4AA4: Stratified by Inflammation burden (insufficient comparisons)                                     | 272        |
| 4AA5: Stratified by Source water quality (insufficient comparisons)                                    | 273        |
| 4AA6: Stratified by Sanitation (insufficient comparisons)                                              | 274        |
| 4AA7: Stratified by Supplement duration (insufficient comparisons)                                     | 275        |
| 4AA8: Stratified by Iron dose (insufficient comparisons)                                               | 276        |
| 4AA9: Stratified by Frequency of contact (insufficient comparisons)                                    | 277        |
| 4AA10: Stratified by Average SQ-LNS compliance (insufficient comparisons)                              | 278        |

These figures are forest plots showing the study-level effect modification of intervention effects. Each figure shows the study-level estimates along with the corresponding pooled estimate grouped by study-level effect modifier category. For continuous outcomes the intervention effect is measured by the difference in mean of the LNS group minus control. For log transformed continuous outcomes, the intervention effect is measured by the ratio of geometric means, the effect estimate is the geometric mean in the LNS group divided by the geometric mean in the control group. For dichotomous outcomes analyzed via prevalence ratios, the effect estimate is the prevalence in the LNS group divided by the prevalence in the control group. For dichotomous outcomes analyzed via prevalence differences, the effect estimate is the prevalence in the LNS group minus the prevalence in the control group. The labels on the left y-axis correspond to trial level information. The values on the right indicate the study level effect estimate, confidence interval, and weighting for deriving the pooled estimates. Due to the limited number of studies, we were able to examine only a few, if any, study-level effect modifiers for sTfR, ZPP, plasma zinc, retinol and RBP, and could not examine differences in the effect of SQ-LNS on ferritin by study-level anemia, malaria or inflammation prevalence. RBP, retinol binding protein.

## Supplemental figure 4A: Mean difference in hemoglobin concentration

### 4A1: Stratified by Geographic region

**Geographic region**  
( $p$ -diff = 0.725)

**Geographic region – SEAR**

| Country    | Trial         | N           | N          |
|------------|---------------|-------------|------------|
| Bangladesh | JiVitA-4 (35) | 457         | 146        |
| Bangladesh | RDNS (36)     | 549         | 272        |
| Bangladesh | WASH-B (37)   | 234         | 186        |
|            |               | <b>1240</b> | <b>604</b> |

$I^2 = 0.00$ ,  $\text{Tau}^2 = 0.00$

**Geographic region – AFR**

|              |                   |             |             |
|--------------|-------------------|-------------|-------------|
| Burkina Faso | iLiNS-Zinc (38)   | 1957        | 664         |
| Burkina Faso | PROMIS CS (39)    | 574         | 581         |
| Ghana        | GHANA (40)        | 98          | 96          |
| Ghana        | iLiNS-DYADG (41)  | 328         | 661         |
| Kenya        | WASH-B (42)       | 350         | 300         |
| Madagascar   | MAHAY (43)        | 600         | 588         |
| Malawi       | iLiNS-DYADM (44)  | 210         | 432         |
| Malawi       | iLiNS-DOSE (45)   | 243         | 82          |
| Mali         | PROMIS CS (46)    | 953         | 970         |
| Zimbabwe     | SHINE (HIV-) (47) | 1682        | 1594        |
| Zimbabwe     | SHINE (HIV+) (48) | 306         | 285         |
|              |                   | <b>7301</b> | <b>6253</b> |

$I^2 = 0.78$ ,  $\text{Tau}^2 = 5.36$

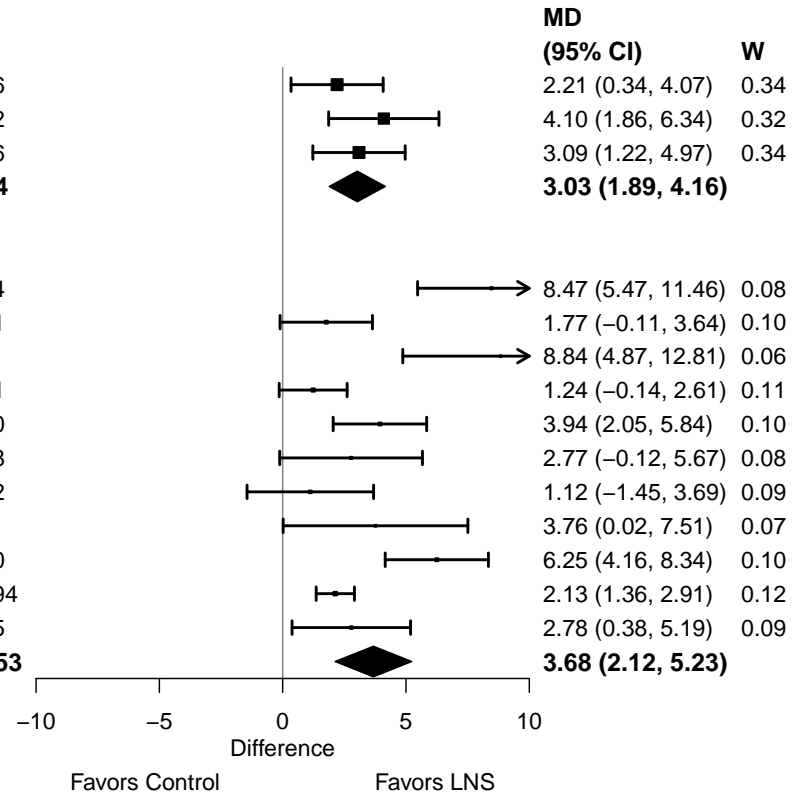



Supplemental figure 4A: Mean difference in hemoglobin concentration

4A2: Stratified by Anemia burden

**Anemia burden**  
(p-diff = 0.077)

**Anemia burden – Moderate**

| Country    | Trial             | N           | N           |
|------------|-------------------|-------------|-------------|
| Bangladesh | JiVitA-4 (35)     | 457         | 146         |
| Bangladesh | RDNS (36)         | 549         | 272         |
| Bangladesh | WASH-B (37)       | 234         | 186         |
| Ghana      | iLiNS-DYADG (41)  | 328         | 661         |
| Kenya      | WASH-B (42)       | 350         | 300         |
| Madagascar | MAHAY (43)        | 600         | 588         |
| Zimbabwe   | SHINE (HIV-) (47) | 1682        | 1594        |
| Zimbabwe   | SHINE (HIV+) (48) | 306         | 285         |
|            |                   | <b>4506</b> | <b>4032</b> |

**I<sup>2</sup> = 0.20, Tau<sup>2</sup> = 0.16**

**Anemia burden – High**

|              |                  |             |             |
|--------------|------------------|-------------|-------------|
| Burkina Faso | iLiNS-Zinc (38)  | 1957        | 664         |
| Burkina Faso | PROMIS CS (39)   | 574         | 581         |
| Ghana        | GHANA (40)       | 98          | 96          |
| Malawi       | iLiNS-DYADM (44) | 210         | 432         |
| Malawi       | iLiNS-DOSE (45)  | 243         | 82          |
| Mali         | PROMIS CS (46)   | 953         | 970         |
|              |                  | <b>4035</b> | <b>2825</b> |

**I<sup>2</sup> = 0.83, Tau<sup>2</sup> = 8.80**

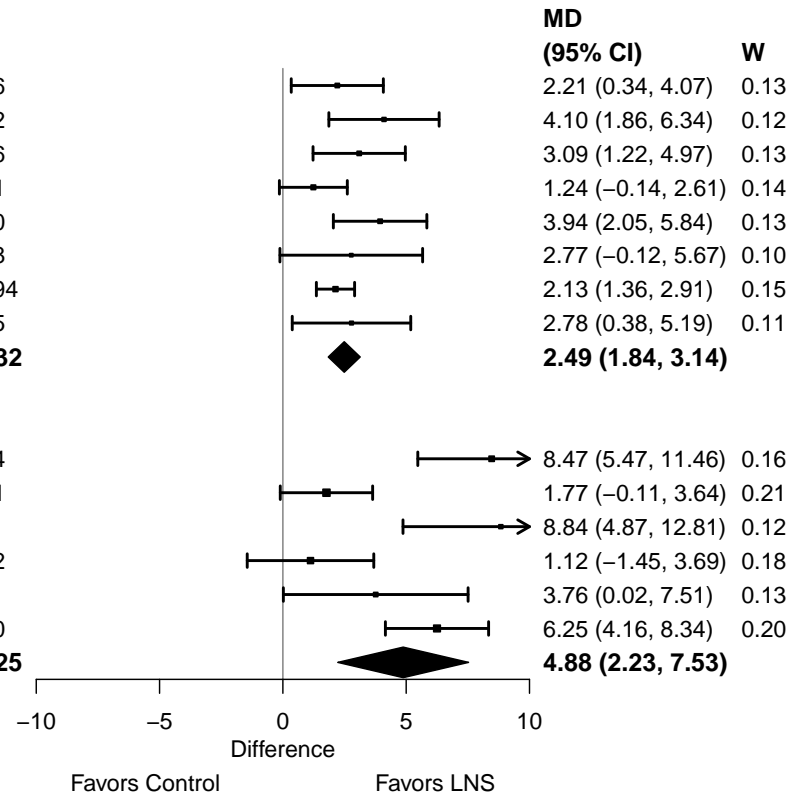

Supplemental figure 4A: Mean difference in hemoglobin concentration

4A3: Stratified by Malaria prevalence

**Malaria prevalence**

( $p$ -diff = 0.354)

**Malaria prevalence – Less than 10%**

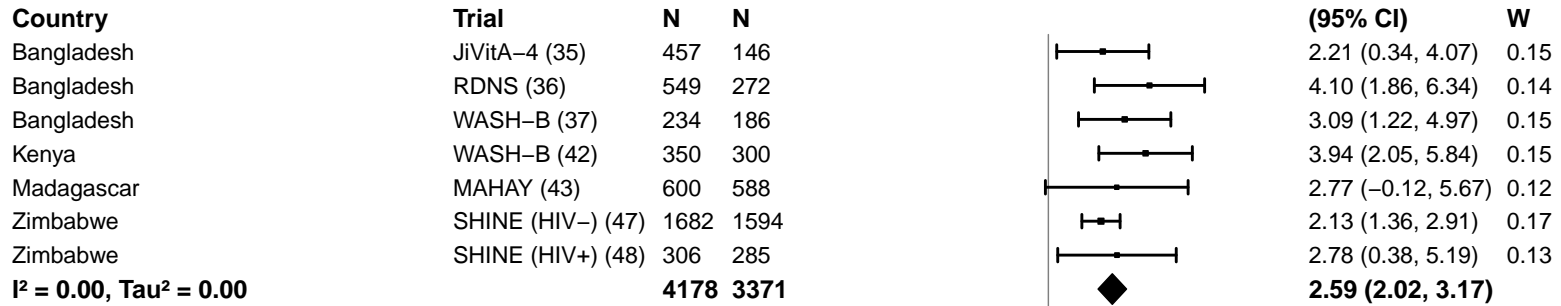

**Malaria prevalence – At least 10%**

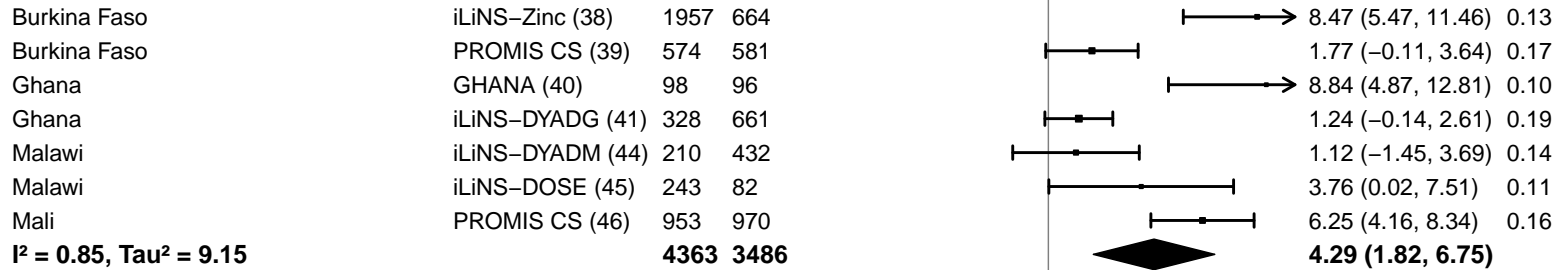

Supplemental figure 4A: Mean difference in hemoglobin concentration

4A4: Stratified by Inflammation burden

**Inflammation burden**

(p-diff = 0.676)

**Inflammation burden – Low**

| Country    | Trial             | N           | N           |
|------------|-------------------|-------------|-------------|
| Bangladesh | RDNS (36)         | 549         | 272         |
| Bangladesh | WASH-B (37)       | 234         | 186         |
| Ghana      | GHANA (40)        | 98          | 96          |
| Ghana      | iLiNS-DYADG (41)  | 328         | 661         |
| Kenya      | WASH-B (42)       | 350         | 300         |
| Madagascar | MAHAY (43)        | 600         | 588         |
| Zimbabwe   | SHINE (HIV-) (47) | 1682        | 1594        |
| Zimbabwe   | SHINE (HIV+) (48) | 306         | 285         |
|            |                   | <b>4147</b> | <b>3982</b> |

**I<sup>2</sup> = 0.62, Tau<sup>2</sup> = 2.50**

**Inflammation burden – High**

|              |                  |             |             |
|--------------|------------------|-------------|-------------|
| Bangladesh   | JiVitA-4 (35)    | 457         | 146         |
| Burkina Faso | iLiNS-Zinc (38)  | 1957        | 664         |
| Burkina Faso | PROMIS CS (39)   | 574         | 581         |
| Malawi       | iLiNS-DYADM (44) | 210         | 432         |
| Malawi       | iLiNS-DOSE (45)  | 243         | 82          |
| Mali         | PROMIS CS (46)   | 953         | 970         |
|              |                  | <b>4394</b> | <b>2875</b> |

**I<sup>2</sup> = 0.81, Tau<sup>2</sup> = 6.54**

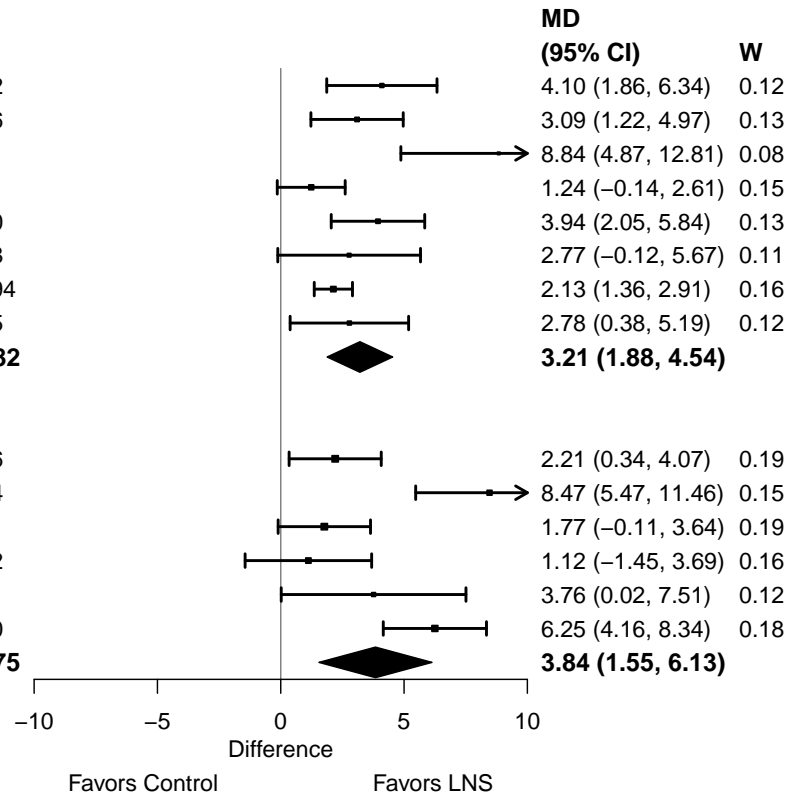

Supplemental figure 4A: Mean difference in hemoglobin concentration

4A5: Stratified by Source water quality

**Source water quality**

(p-diff = 0.711)

**Source water quality – Improved**

| Country    | Trial            | N           | N           |
|------------|------------------|-------------|-------------|
| Bangladesh | JiVitA-4 (35)    | 457         | 146         |
| Bangladesh | RDNS (36)        | 549         | 272         |
| Bangladesh | WASH-B (37)      | 105         | 60          |
| Ghana      | GHANA (40)       | 98          | 96          |
| Ghana      | iLiNS-DYADG (41) | 328         | 661         |
| Malawi     | iLiNS-DYADM (44) | 210         | 432         |
| Malawi     | iLiNS-DOSE (45)  | 243         | 82          |
|            |                  | <b>1990</b> | <b>1749</b> |

**I<sup>2</sup> = 0.64, Tau<sup>2</sup> = 3.93**

**Source water quality – Unimproved**

|              |                   |             |             |
|--------------|-------------------|-------------|-------------|
| Burkina Faso | iLiNS-Zinc (38)   | 1957        | 664         |
| Burkina Faso | PROMIS CS (39)    | 574         | 581         |
| Kenya        | WASH-B (42)       | 196         | 162         |
| Madagascar   | MAHAY (43)        | 600         | 588         |
| Mali         | PROMIS CS (46)    | 953         | 970         |
| Zimbabwe     | SHINE (HIV-) (47) | 819         | 795         |
| Zimbabwe     | SHINE (HIV+) (48) | 133         | 126         |
|              |                   | <b>5232</b> | <b>3886</b> |

**I<sup>2</sup> = 0.78, Tau<sup>2</sup> = 5.06**

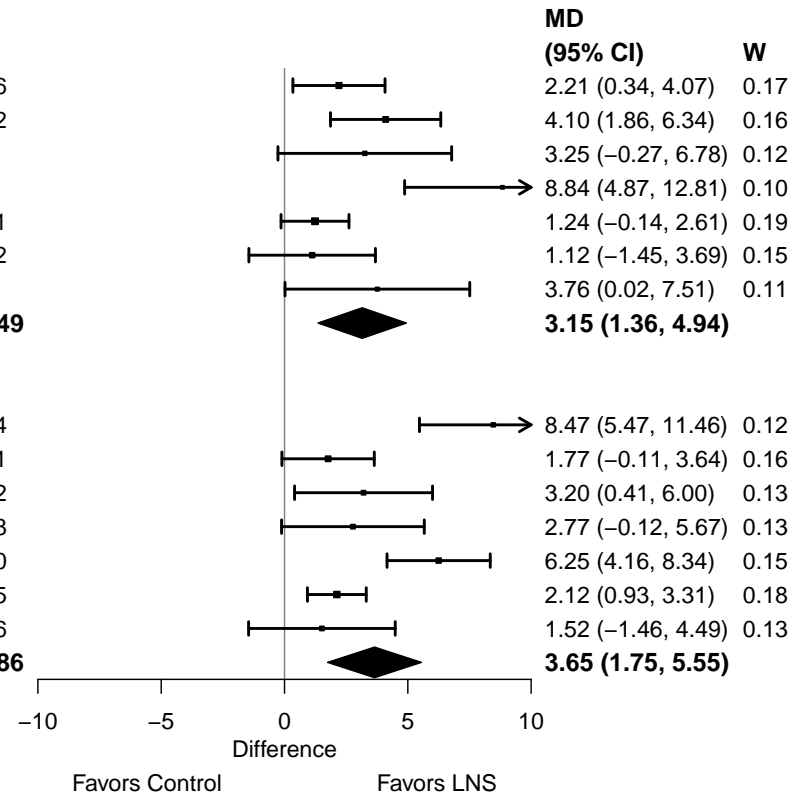

Supplemental figure 4A: Mean difference in hemoglobin concentration

4A6: Stratified by Sanitation

**Sanitation**  
(p-diff = 0.723)

**Sanitation – Improved**

| Country                                             | Trial            | N           | N           |
|-----------------------------------------------------|------------------|-------------|-------------|
| Bangladesh                                          | JiVitA-4 (35)    | 457         | 146         |
| Bangladesh                                          | RDNS (36)        | 549         | 272         |
| Bangladesh                                          | WASH-B (37)      | 105         | 60          |
| Burkina Faso                                        | PROMIS CS (39)   | 574         | 581         |
| Ghana                                               | GHANA (40)       | 98          | 96          |
| Ghana                                               | iLiNS-DYADG (41) | 328         | 661         |
| Mali                                                | PROMIS CS (46)   | 953         | 970         |
| <b>I<sup>2</sup> = 0.78, Tau<sup>2</sup> = 5.14</b> |                  | <b>3064</b> | <b>2786</b> |

**Sanitation – Unimproved**

|                                                     |                   |             |             |
|-----------------------------------------------------|-------------------|-------------|-------------|
| Burkina Faso                                        | iLiNS-Zinc (38)   | 1957        | 664         |
| Kenya                                               | WASH-B (42)       | 196         | 162         |
| Madagascar                                          | MAHAY (43)        | 600         | 588         |
| Malawi                                              | iLiNS-DYADM (44)  | 210         | 432         |
| Malawi                                              | iLiNS-DOSE (45)   | 243         | 82          |
| Zimbabwe                                            | SHINE (HIV-) (47) | 819         | 795         |
| Zimbabwe                                            | SHINE (HIV+) (48) | 133         | 126         |
| <b>I<sup>2</sup> = 0.66, Tau<sup>2</sup> = 3.92</b> |                   | <b>4158</b> | <b>2849</b> |

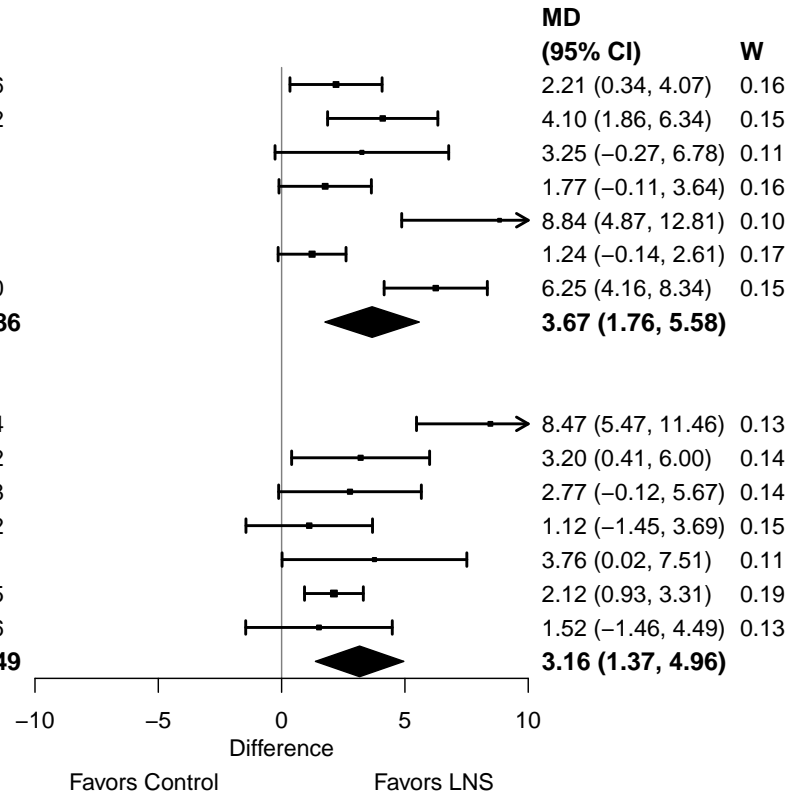

Supplemental figure 4A: Mean difference in hemoglobin concentration

4A7: Stratified by Supplement duration

**Supplement duration**

(p-diff = 0.304)

**Supplement duration – 12m or less**

| Country      | Trial             | N           | N           |
|--------------|-------------------|-------------|-------------|
| Bangladesh   | JiVitA-4 (35)     | 457         | 146         |
| Burkina Faso | iLiNS-Zinc (38)   | 1957        | 664         |
| Burkina Faso | PROMIS CS (39)    | 574         | 581         |
| Ghana        | GHANA (40)        | 98          | 96          |
| Ghana        | iLiNS-DYADG (41)  | 328         | 661         |
| Madagascar   | MAHAY (43)        | 600         | 588         |
| Malawi       | iLiNS-DYADM (44)  | 210         | 432         |
| Malawi       | iLiNS-DOSE (45)   | 243         | 82          |
| Zimbabwe     | SHINE (HIV-) (47) | 1682        | 1594        |
| Zimbabwe     | SHINE (HIV+) (48) | 306         | 285         |
|              |                   | <b>6455</b> | <b>5129</b> |

**I<sup>2</sup> = 0.71, Tau<sup>2</sup> = 5.37**

**Supplement duration – > 12m**

|            |                |             |             |
|------------|----------------|-------------|-------------|
| Bangladesh | RDNS (36)      | 549         | 272         |
| Bangladesh | WASH-B (37)    | 234         | 186         |
| Kenya      | WASH-B (42)    | 350         | 300         |
| Mali       | PROMIS CS (46) | 953         | 970         |
|            |                | <b>2086</b> | <b>1728</b> |

**I<sup>2</sup> = 0.41, Tau<sup>2</sup> = 0.74**

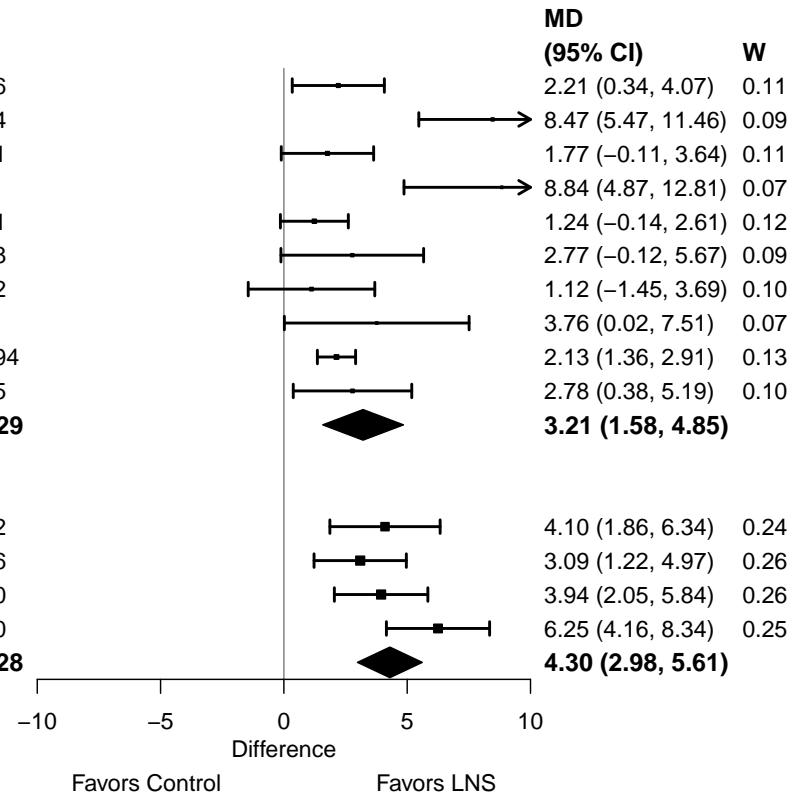

Supplemental figure 4A: Mean difference in hemoglobin concentration

4A8: Stratified by Iron dose

**Iron dose**

(p-diff = 0.253)

**Iron dose – Less than 9 mg**

| Country      | Trial             | N           | N           |
|--------------|-------------------|-------------|-------------|
| Bangladesh   | JiVitA-4 (35)     | 457         | 146         |
| Burkina Faso | iLiNS-Zinc (38)   | 1957        | 664         |
| Burkina Faso | PROMIS CS (39)    | 574         | 581         |
| Ghana        | iLiNS-DYADG (41)  | 328         | 661         |
| Madagascar   | MAHAY (43)        | 600         | 588         |
| Malawi       | iLiNS-DYADM (44)  | 210         | 432         |
| Malawi       | iLiNS-DOSE (45)   | 243         | 82          |
| Mali         | PROMIS CS (46)    | 953         | 970         |
| Zimbabwe     | SHINE (HIV-) (47) | 1682        | 1594        |
| Zimbabwe     | SHINE (HIV+) (48) | 306         | 285         |
|              |                   | <b>7310</b> | <b>6003</b> |

**I<sup>2</sup> = 0.74, Tau<sup>2</sup> = 3.86**

**Iron dose – 9 mg**

|            |             |             |            |
|------------|-------------|-------------|------------|
| Bangladesh | RDNS (36)   | 549         | 272        |
| Bangladesh | WASH-B (37) | 234         | 186        |
| Ghana      | GHANA (40)  | 98          | 96         |
| Kenya      | WASH-B (42) | 350         | 300        |
|            |             | <b>1231</b> | <b>854</b> |

**I<sup>2</sup> = 0.55, Tau<sup>2</sup> = 3.56**

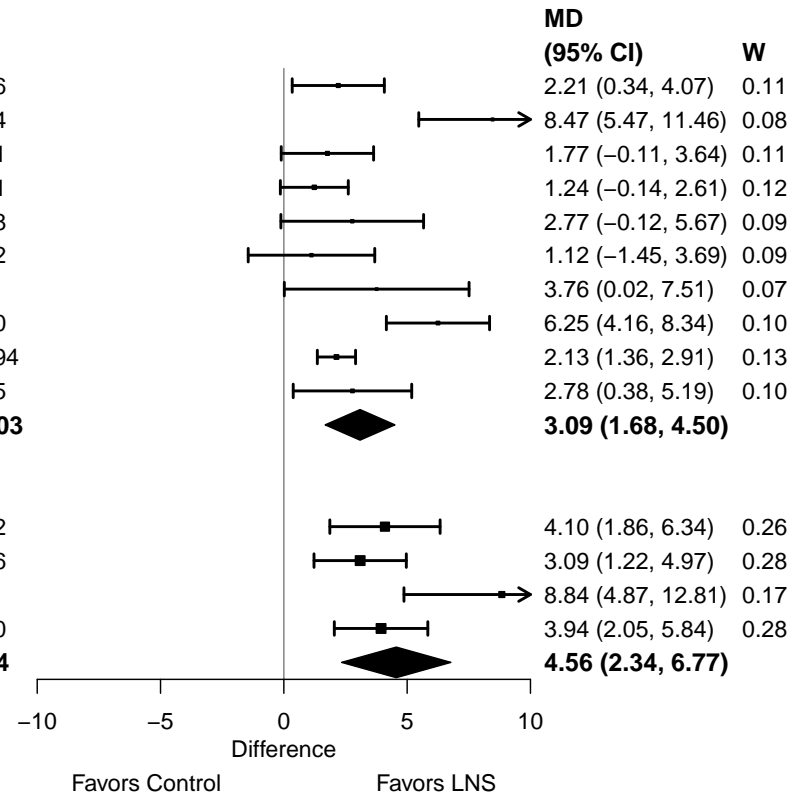

Supplemental figure 4A: Mean difference in hemoglobin concentration

4A9: Stratified by Frequency of contact

**Frequency of contact**

(p-diff = 0.806)

**Frequency of contact – Monthly**

| Country      | Trial             | N           | N           |
|--------------|-------------------|-------------|-------------|
| Bangladesh   | RDNS (36)         | 549         | 272         |
| Burkina Faso | PROMIS CS (39)    | 574         | 581         |
| Kenya        | WASH-B (42)       | 350         | 300         |
| Madagascar   | MAHAY (43)        | 600         | 588         |
| Mali         | PROMIS CS (46)    | 953         | 970         |
| Zimbabwe     | SHINE (HIV-) (47) | 1682        | 1594        |
| Zimbabwe     | SHINE (HIV+) (48) | 306         | 285         |
|              |                   | <b>5014</b> | <b>4590</b> |

**I<sup>2</sup> = 0.65, Tau<sup>2</sup> = 1.36**

**Frequency of contact – Weekly**

|              |                  |             |             |
|--------------|------------------|-------------|-------------|
| Bangladesh   | JiVitA-4 (35)    | 457         | 146         |
| Bangladesh   | WASH-B (37)      | 234         | 186         |
| Burkina Faso | iLiNS-Zinc (38)  | 1957        | 664         |
| Ghana        | GHANA (40)       | 98          | 96          |
| Ghana        | iLiNS-DYADG (41) | 328         | 661         |
| Malawi       | iLiNS-DYADM (44) | 210         | 432         |
| Malawi       | iLiNS-DOSE (45)  | 243         | 82          |
|              |                  | <b>3527</b> | <b>2267</b> |

**I<sup>2</sup> = 0.80, Tau<sup>2</sup> = 8.10**

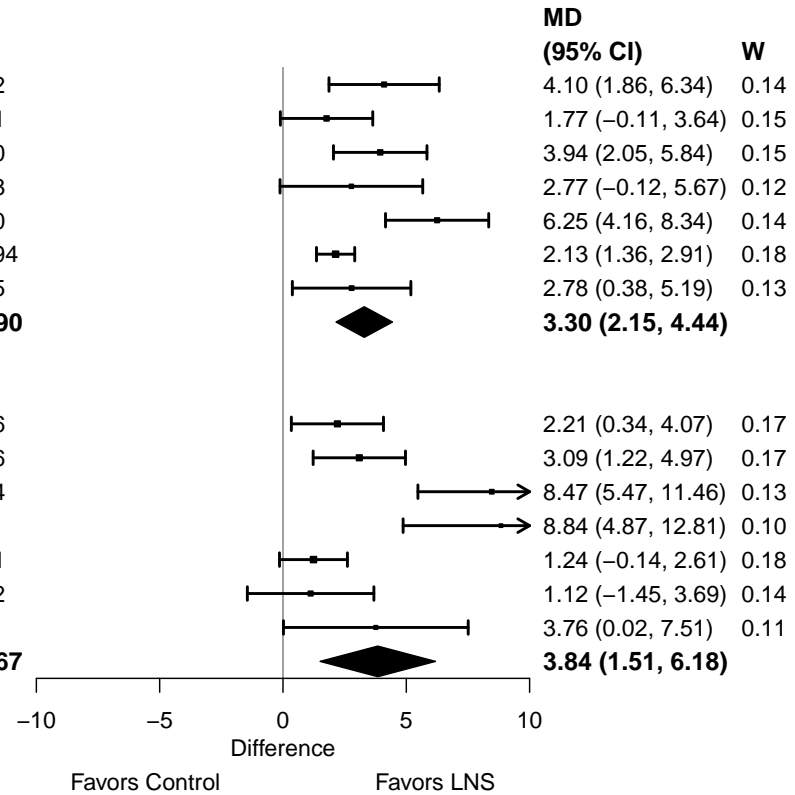



Supplemental figure 4A: Mean difference in hemoglobin concentration

4A10: Stratified by Average SQ-LNS compliance

**Average SQ-LNS compliance**  
(p-diff = 0.086)

**Average SQ-LNS compliance – Low**

| Country      | Trial             | N           | N           |
|--------------|-------------------|-------------|-------------|
| Burkina Faso | PROMIS CS (39)    | 574         | 581         |
| Ghana        | iLiNS-DYADG (41)  | 328         | 661         |
| Malawi       | iLiNS-DYADM (44)  | 210         | 432         |
| Malawi       | iLiNS-DOSE (45)   | 243         | 82          |
| Mali         | PROMIS CS (46)    | 953         | 970         |
| Zimbabwe     | SHINE (HIV-) (47) | 1682        | 1594        |
| Zimbabwe     | SHINE (HIV+) (48) | 306         | 285         |
|              |                   | <b>4296</b> | <b>4605</b> |

**I<sup>2</sup> = 0.67, Tau<sup>2</sup> = 2.09**

**Average SQ-LNS compliance – High**

|              |                 |             |             |
|--------------|-----------------|-------------|-------------|
| Bangladesh   | JiVitA-4 (35)   | 457         | 146         |
| Bangladesh   | RDNS (36)       | 549         | 272         |
| Bangladesh   | WASH-B (37)     | 234         | 186         |
| Burkina Faso | iLiNS-Zinc (38) | 1957        | 664         |
| Ghana        | GHANA (40)      | 98          | 96          |
| Kenya        | WASH-B (42)     | 350         | 300         |
|              |                 | <b>3645</b> | <b>1664</b> |

**I<sup>2</sup> = 0.73, Tau<sup>2</sup> = 5.66**

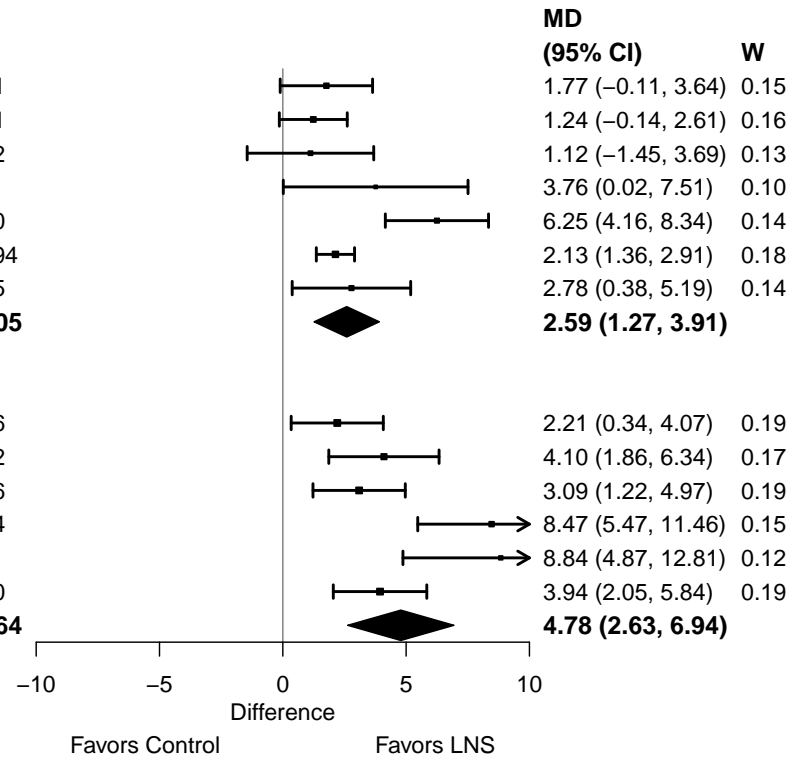

## Supplemental figure 4B: Anemia prevalence ratio

### 4B1: Stratified by Geographic region

**Geographic region**  
( $p$ -diff = 0.055)

**Geographic region – SEAR**

| Country    | Trial         | N           | N          |
|------------|---------------|-------------|------------|
| Bangladesh | JiVitA-4 (35) | 457         | 146        |
| Bangladesh | RDNS (36)     | 549         | 272        |
| Bangladesh | WASH-B (37)   | 234         | 186        |
|            |               | <b>1240</b> | <b>604</b> |

$I^2 = 0.43$ ,  $Tau^2 = 0.05$

**Geographic region – AFR**

|              |                   |             |             |
|--------------|-------------------|-------------|-------------|
| Burkina Faso | iLiNS-Zinc (38)   | 1957        | 664         |
| Burkina Faso | PROMIS CS (39)    | 574         | 581         |
| Ghana        | GHANA (40)        | 98          | 96          |
| Ghana        | iLiNS-DYADG (41)  | 328         | 661         |
| Kenya        | WASH-B (42)       | 350         | 300         |
| Madagascar   | MAHAY (43)        | 600         | 588         |
| Malawi       | iLiNS-DYADM (44)  | 210         | 432         |
| Malawi       | iLiNS-DOSE (45)   | 243         | 82          |
| Mali         | PROMIS CS (46)    | 953         | 970         |
| Zimbabwe     | SHINE (HIV-) (47) | 1682        | 1594        |
| Zimbabwe     | SHINE (HIV+) (48) | 306         | 285         |
|              |                   | <b>7301</b> | <b>6253</b> |

$I^2 = 0.64$ ,  $Tau^2 = 0.02$

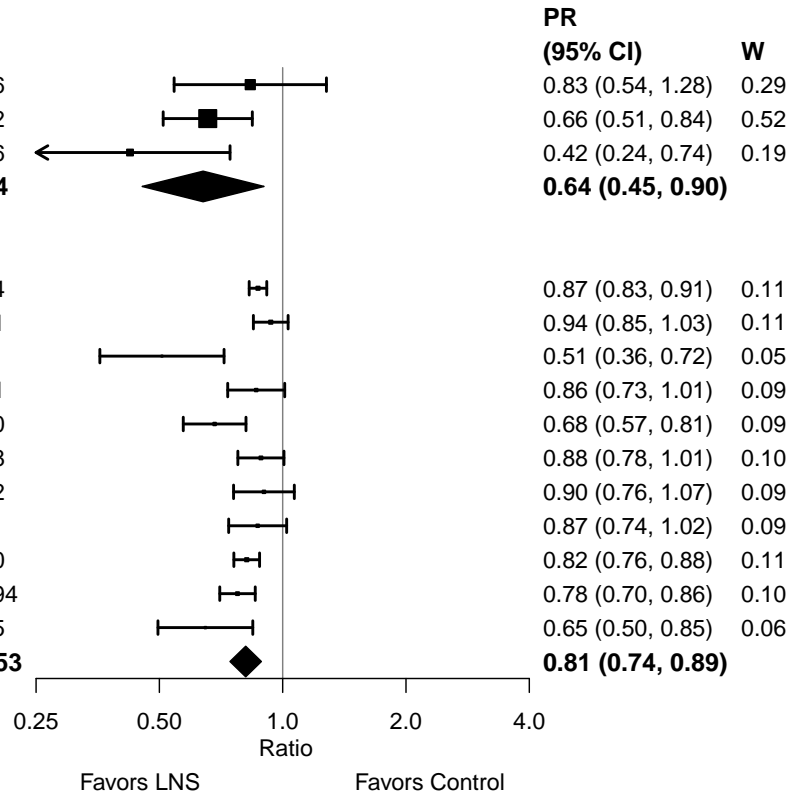

Supplemental figure 4B: Anemia prevalence ratio

4B2: Stratified by Anemia burden

**Anemia burden**  
( $p$ -diff = 0.073)

**Anemia burden – Moderate**

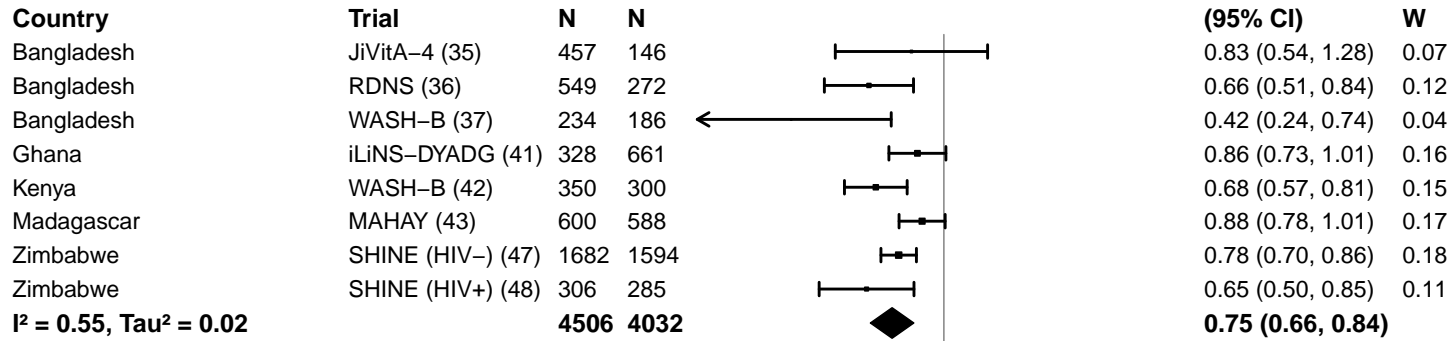

**Anemia burden – High**

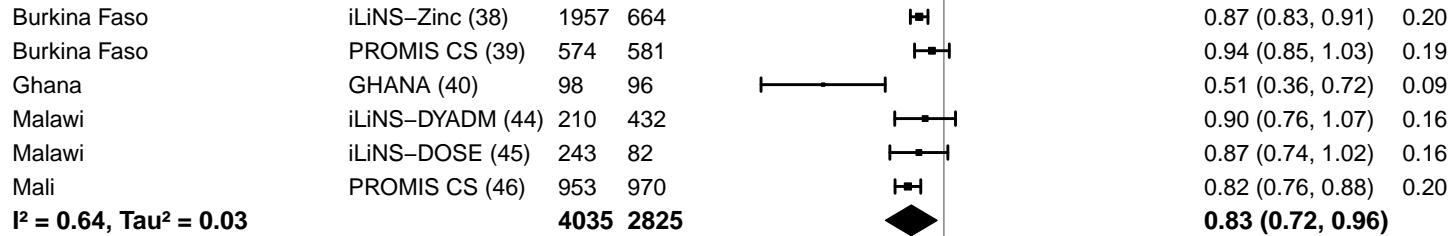

0.25 0.50 1.0 2.0 4.0  
Ratio  
Favors LNS Favors Control

Supplemental figure 4B: Anemia prevalence ratio

4B3: Stratified by Malaria prevalence

**Malaria prevalence**

(p-diff = 0.023)

**Malaria prevalence – Less than 10%**

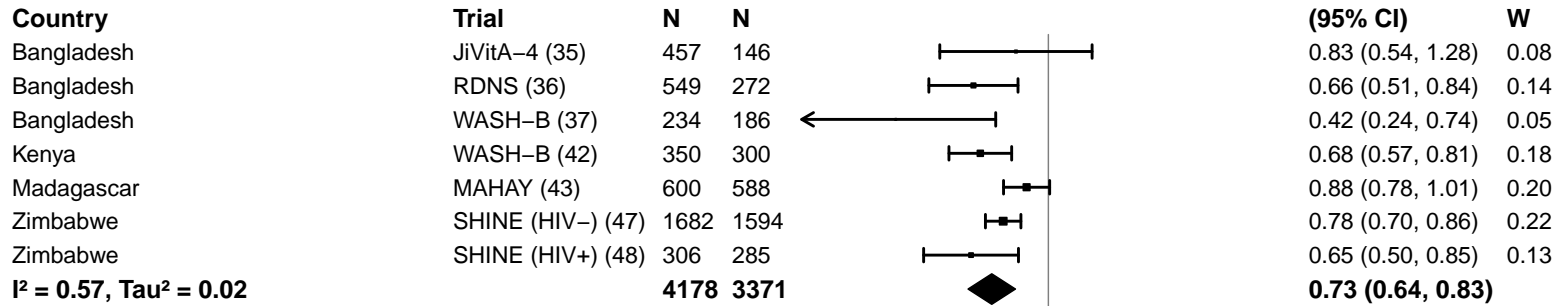

**Malaria prevalence – At least 10%**

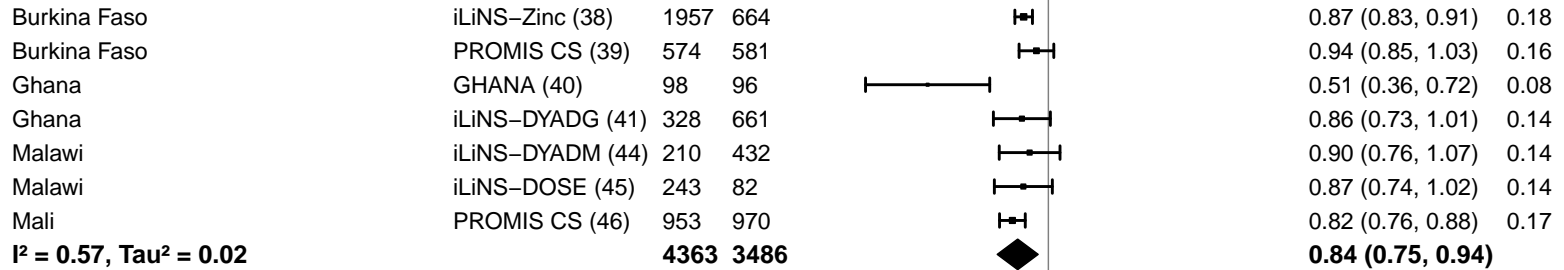

Supplemental figure 4B: Anemia prevalence ratio

4B4: Stratified by Inflammation burden

**Inflammation burden**

( $p$ -diff = 0.008)

**Inflammation burden – Low**

| Country    | Trial             | N           | N           |
|------------|-------------------|-------------|-------------|
| Bangladesh | RDNS (36)         | 549         | 272         |
| Bangladesh | WASH-B (37)       | 234         | 186         |
| Ghana      | GHANA (40)        | 98          | 96          |
| Ghana      | iLiNS-DYADG (41)  | 328         | 661         |
| Kenya      | WASH-B (42)       | 350         | 300         |
| Madagascar | MAHAY (43)        | 600         | 588         |
| Zimbabwe   | SHINE (HIV-) (47) | 1682        | 1594        |
| Zimbabwe   | SHINE (HIV+) (48) | 306         | 285         |
|            |                   | <b>4147</b> | <b>3982</b> |

$I^2 = 0.67, \tau^2 = 0.03$

**Inflammation burden – High**

|              |                  |             |             |
|--------------|------------------|-------------|-------------|
| Bangladesh   | JiVitA-4 (35)    | 457         | 146         |
| Burkina Faso | iLiNS-Zinc (38)  | 1957        | 664         |
| Burkina Faso | PROMIS CS (39)   | 574         | 581         |
| Malawi       | iLiNS-DYADM (44) | 210         | 432         |
| Malawi       | iLiNS-DOSE (45)  | 243         | 82          |
| Mali         | PROMIS CS (46)   | 953         | 970         |
|              |                  | <b>4394</b> | <b>2875</b> |

$I^2 = 0.03, \tau^2 = 0.00$

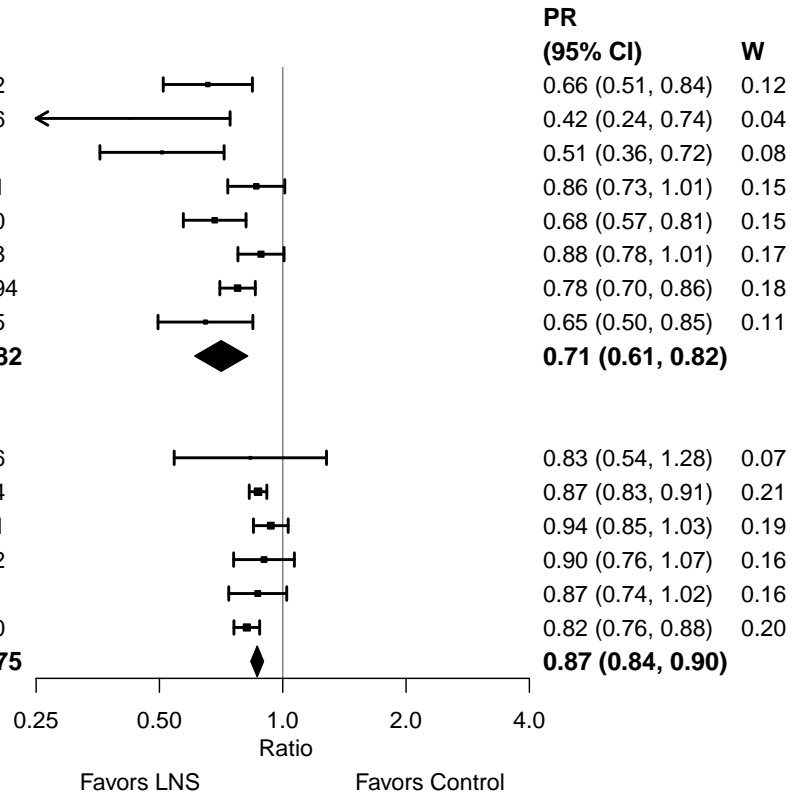

Supplemental figure 4B: Anemia prevalence ratio

4B5: Stratified by Source water quality

**Source water quality**

(p-diff = 0.372)

**Source water quality – Improved**

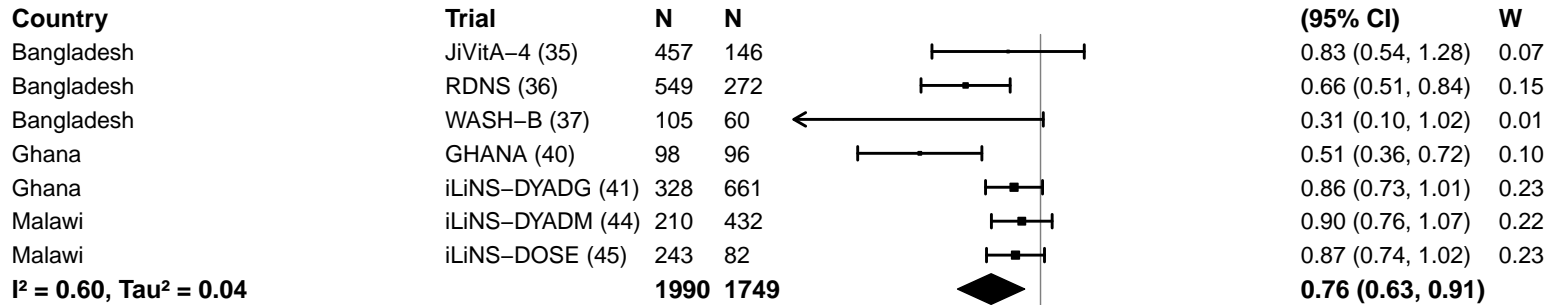

**Source water quality – Unimproved**

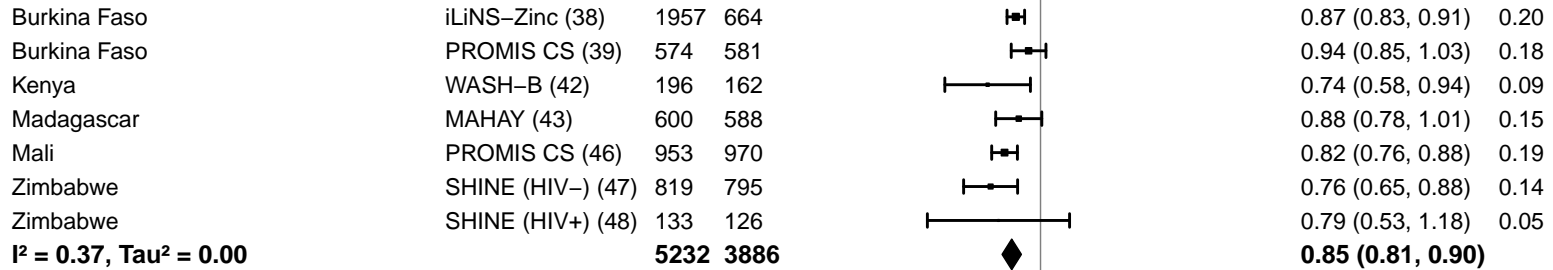

Supplemental figure 4B: Anemia prevalence ratio

4B6: Stratified by Sanitation

**Sanitation**  
(p-diff = 0.518)

**Sanitation – Improved**

| Country      | Trial            | N           | N           |
|--------------|------------------|-------------|-------------|
| Bangladesh   | JiVitA-4 (35)    | 457         | 146         |
| Bangladesh   | RDNS (36)        | 549         | 272         |
| Bangladesh   | WASH-B (37)      | 105         | 60          |
| Burkina Faso | PROMIS CS (39)   | 574         | 581         |
| Ghana        | GHANA (40)       | 98          | 96          |
| Ghana        | iLiNS-DYADG (41) | 328         | 661         |
| Mali         | PROMIS CS (46)   | 953         | 970         |
|              |                  | <b>3064</b> | <b>2786</b> |

**I<sup>2</sup> = 0.70, Tau<sup>2</sup> = 0.04**

**Sanitation – Unimproved**

|              |                   |             |             |
|--------------|-------------------|-------------|-------------|
| Burkina Faso | iLiNS-Zinc (38)   | 1957        | 664         |
| Kenya        | WASH-B (42)       | 196         | 162         |
| Madagascar   | MAHAY (43)        | 600         | 588         |
| Malawi       | iLiNS-DYADM (44)  | 210         | 432         |
| Malawi       | iLiNS-DOSE (45)   | 243         | 82          |
| Zimbabwe     | SHINE (HIV-) (47) | 819         | 795         |
| Zimbabwe     | SHINE (HIV+) (48) | 133         | 126         |
|              |                   | <b>4158</b> | <b>2849</b> |

**I<sup>2</sup> = 0.00, Tau<sup>2</sup> = 0.00**

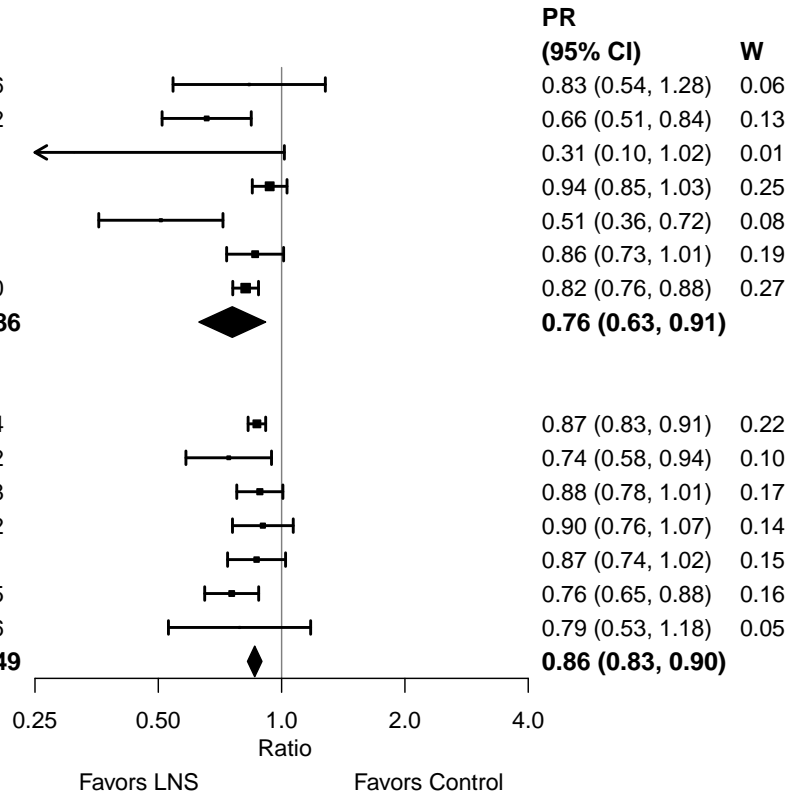

Supplemental figure 4B: Anemia prevalence ratio

4B7: Stratified by Supplement duration

**Supplement duration**

(p-diff = 0.058)

**Supplement duration – 12m or less**

| Country      | Trial             | N           | N           |
|--------------|-------------------|-------------|-------------|
| Bangladesh   | JiVitA-4 (35)     | 457         | 146         |
| Burkina Faso | iLiNS-Zinc (38)   | 1957        | 664         |
| Burkina Faso | PROMIS CS (39)    | 574         | 581         |
| Ghana        | GHANA (40)        | 98          | 96          |
| Ghana        | iLiNS-DYADG (41)  | 328         | 661         |
| Madagascar   | MAHAY (43)        | 600         | 588         |
| Malawi       | iLiNS-DYADM (44)  | 210         | 432         |
| Malawi       | iLiNS-DOSE (45)   | 243         | 82          |
| Zimbabwe     | SHINE (HIV-) (47) | 1682        | 1594        |
| Zimbabwe     | SHINE (HIV+) (48) | 306         | 285         |
|              |                   | <b>6455</b> | <b>5129</b> |

**I<sup>2</sup> = 0.57, Tau<sup>2</sup> = 0.01**

**Supplement duration – > 12m**

|            |                |             |             |
|------------|----------------|-------------|-------------|
| Bangladesh | RDNS (36)      | 549         | 272         |
| Bangladesh | WASH-B (37)    | 234         | 186         |
| Kenya      | WASH-B (42)    | 350         | 300         |
| Mali       | PROMIS CS (46) | 953         | 970         |
|            |                | <b>2086</b> | <b>1728</b> |

**I<sup>2</sup> = 0.70, Tau<sup>2</sup> = 0.03**

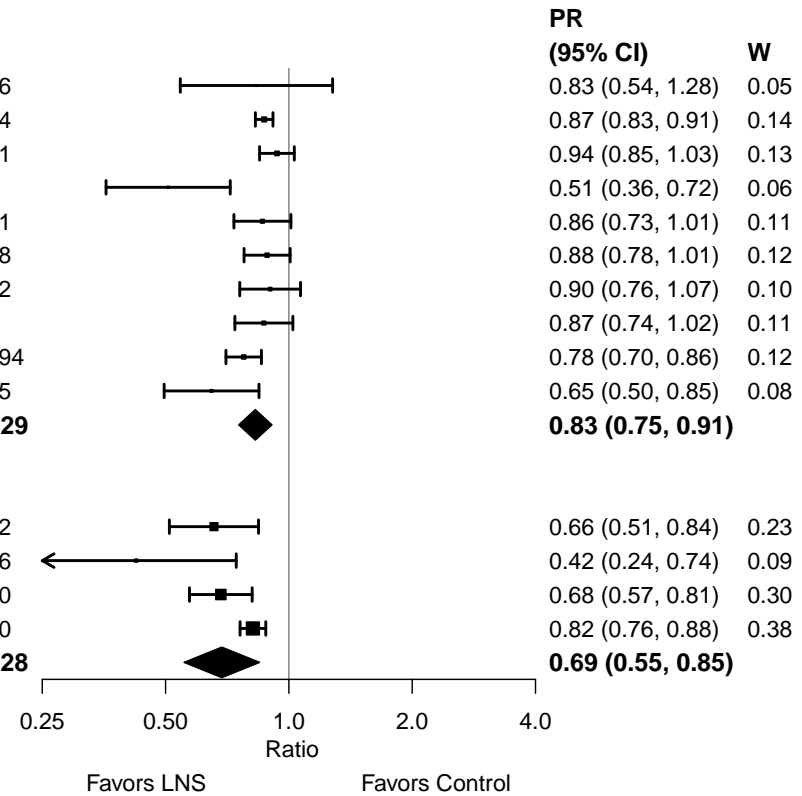



Supplemental figure 4B: Anemia prevalence ratio

4B8: Stratified by Iron dose

**Iron dose**

(p-diff = 0.000)

**Iron dose – Less than 9 mg**

| Country      | Trial             | N           | N           |
|--------------|-------------------|-------------|-------------|
| Bangladesh   | JiVitA-4 (35)     | 457         | 146         |
| Burkina Faso | iLiNS-Zinc (38)   | 1957        | 664         |
| Burkina Faso | PROMIS CS (39)    | 574         | 581         |
| Ghana        | iLiNS-DYADG (41)  | 328         | 661         |
| Madagascar   | MAHAY (43)        | 600         | 588         |
| Malawi       | iLiNS-DYADM (44)  | 210         | 432         |
| Malawi       | iLiNS-DOSE (45)   | 243         | 82          |
| Mali         | PROMIS CS (46)    | 953         | 970         |
| Zimbabwe     | SHINE (HIV-) (47) | 1682        | 1594        |
| Zimbabwe     | SHINE (HIV+) (48) | 306         | 285         |
|              |                   | <b>7310</b> | <b>6003</b> |

**I<sup>2</sup> = 0.35, Tau<sup>2</sup> = 0.00**

**Iron dose – 9 mg**

|            |             |             |            |
|------------|-------------|-------------|------------|
| Bangladesh | RDNS (36)   | 549         | 272        |
| Bangladesh | WASH-B (37) | 234         | 186        |
| Ghana      | GHANA (40)  | 98          | 96         |
| Kenya      | WASH-B (42) | 350         | 300        |
|            |             | <b>1231</b> | <b>854</b> |

**I<sup>2</sup> = 0.30, Tau<sup>2</sup> = 0.01**

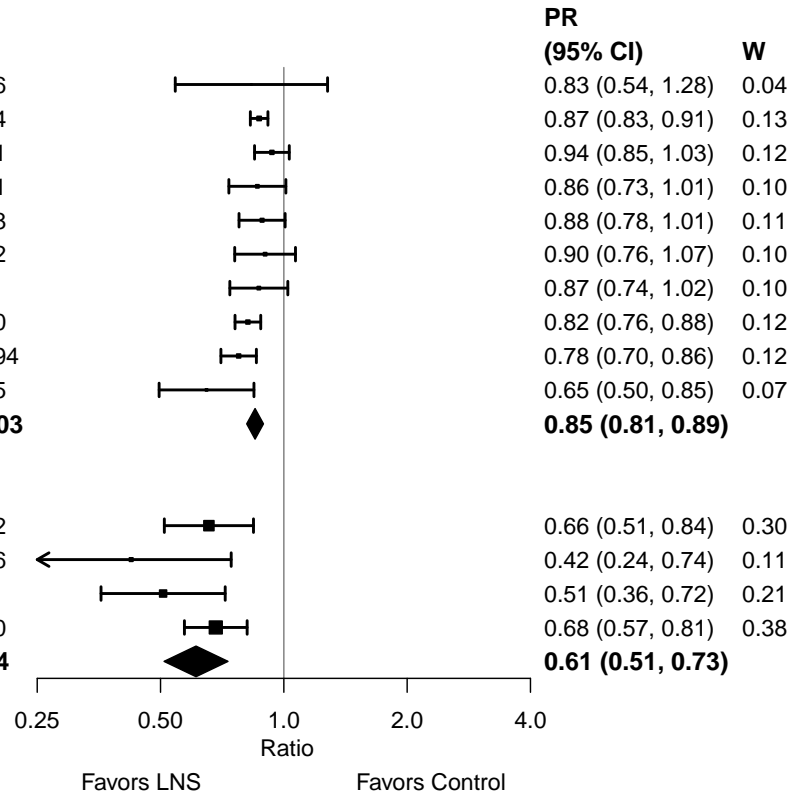

Supplemental figure 4B: Anemia prevalence ratio

4B9: Stratified by Frequency of contact

**Frequency of contact**

(p-diff = 0.714)

**Frequency of contact – Monthly**

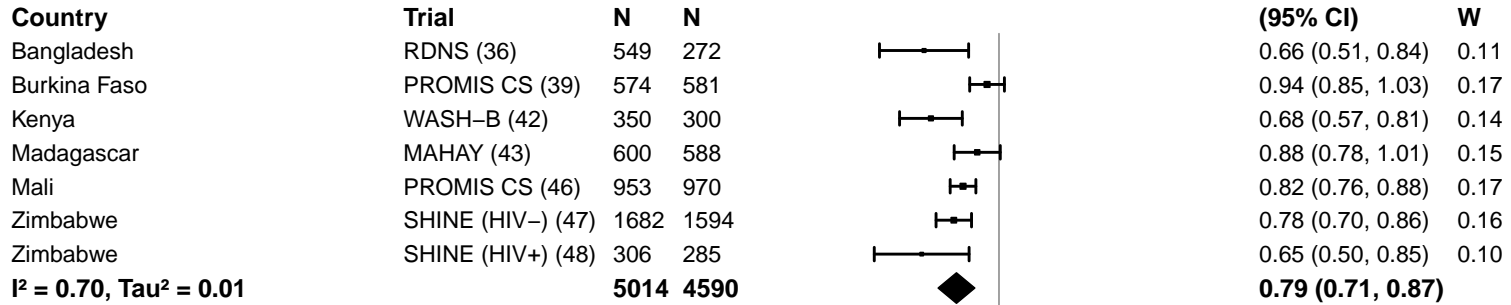

**Frequency of contact – Weekly**

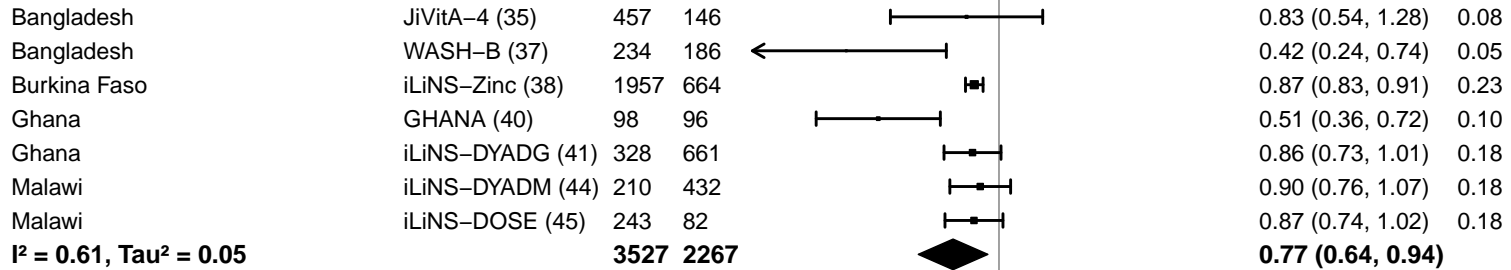

Supplemental figure 4B: Anemia prevalence ratio

4B10: Stratified by Average SQ-LNS compliance

**Average SQ-LNS compliance**  
(p-diff = 0.062)

**Average SQ-LNS compliance – Low**

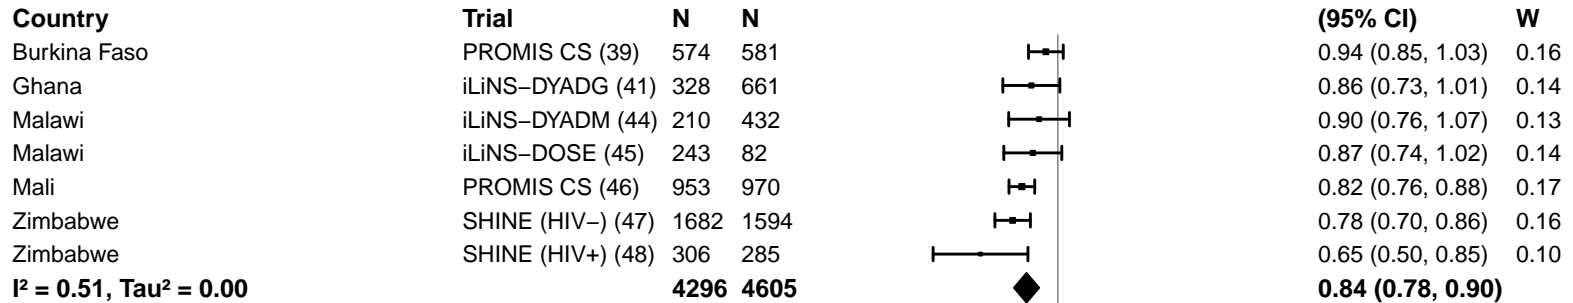

**Average SQ-LNS compliance – High**

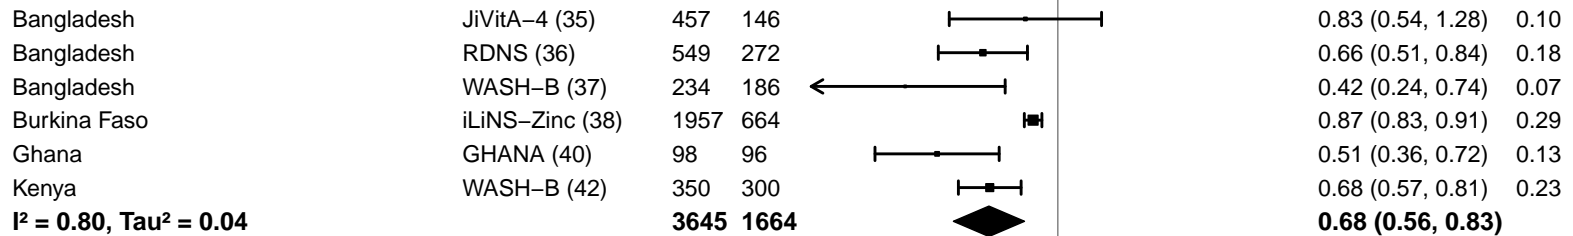

## Supplemental figure 4C: Anemia prevalence difference

### 4C1: Stratified by Geographic region

**Geographic region**  
(p-diff = 0.590)

**Geographic region – SEAR**

| Country    | Trial         | N           | N          |
|------------|---------------|-------------|------------|
| Bangladesh | JiVitA-4 (35) | 457         | 146        |
| Bangladesh | RDNS (36)     | 549         | 272        |
| Bangladesh | WASH-B (37)   | 234         | 186        |
|            |               | <b>1240</b> | <b>604</b> |

**I<sup>2</sup> = 0.65, Tau<sup>2</sup> = 0.00**

**Geographic region – AFR**

|              |                   |             |             |
|--------------|-------------------|-------------|-------------|
| Burkina Faso | iLiNS-Zinc (38)   | 1957        | 664         |
| Burkina Faso | PROMIS CS (39)    | 574         | 581         |
| Ghana        | GHANA (40)        | 98          | 96          |
| Ghana        | iLiNS-DYADG (41)  | 328         | 661         |
| Kenya        | WASH-B (42)       | 350         | 300         |
| Madagascar   | MAHAY (43)        | 600         | 588         |
| Malawi       | iLiNS-DYADM (44)  | 210         | 432         |
| Malawi       | iLiNS-DOSE (45)   | 243         | 82          |
| Mali         | PROMIS CS (46)    | 953         | 970         |
| Zimbabwe     | SHINE (HIV-) (47) | 1682        | 1594        |
| Zimbabwe     | SHINE (HIV+) (48) | 306         | 285         |
|              |                   | <b>7301</b> | <b>6253</b> |

**I<sup>2</sup> = 0.66, Tau<sup>2</sup> = 0.00**

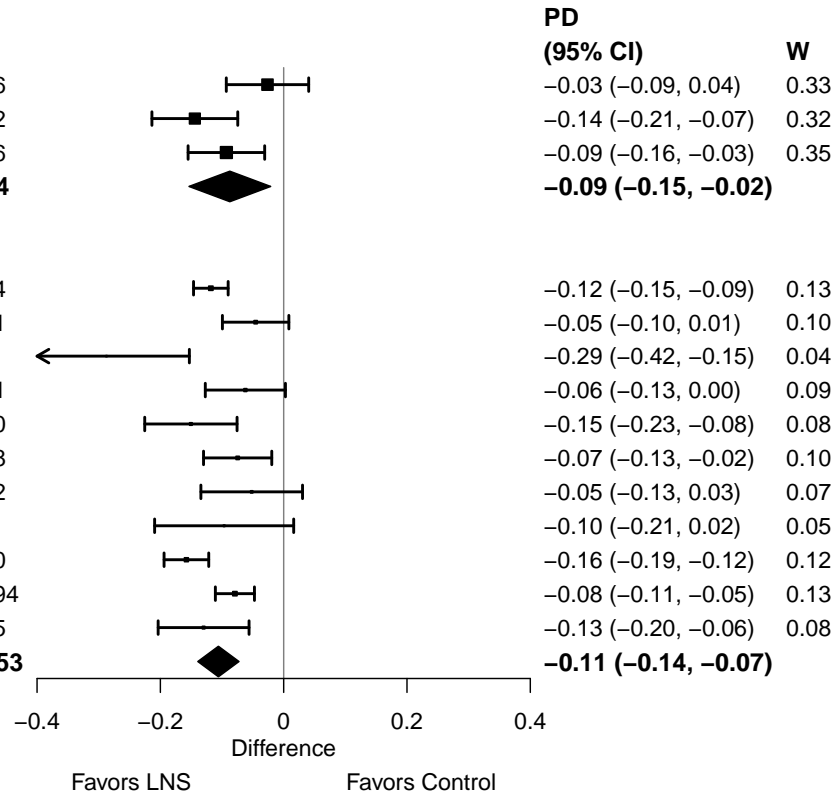

Supplemental figure 4C: Anemia prevalence difference

4C2: Stratified by Anemia burden

**Anemia burden**

(p-diff = 0.407)

**Anemia burden – Moderate**

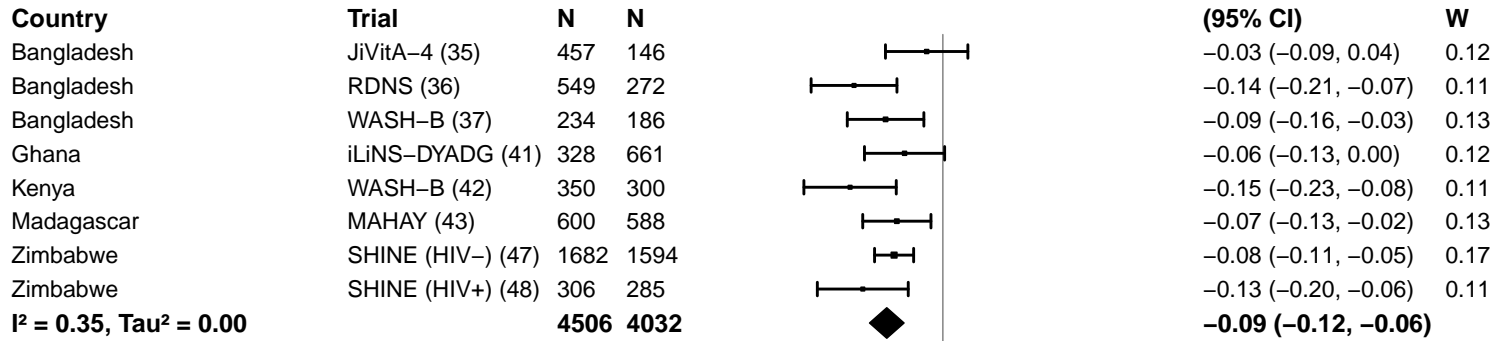

**Anemia burden – High**

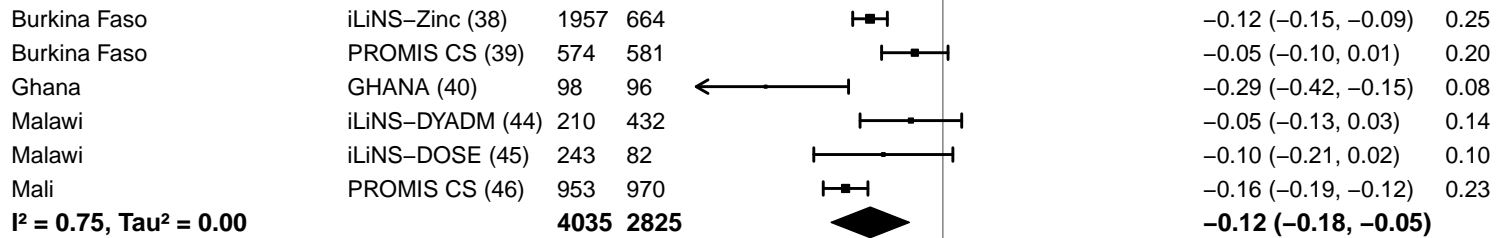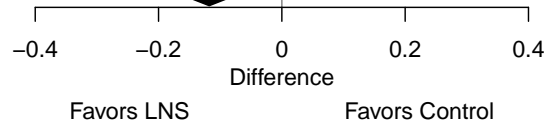

Supplemental figure 4C: Anemia prevalence difference

4C3: Stratified by Malaria prevalence

**Malaria prevalence**

(p-diff = 0.702)

**Malaria prevalence – Less than 10%**

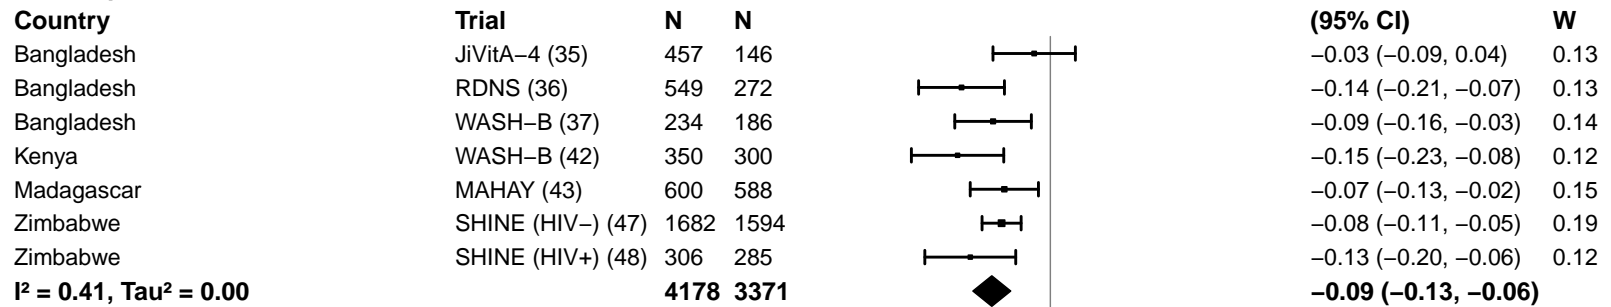

**Malaria prevalence – At least 10%**

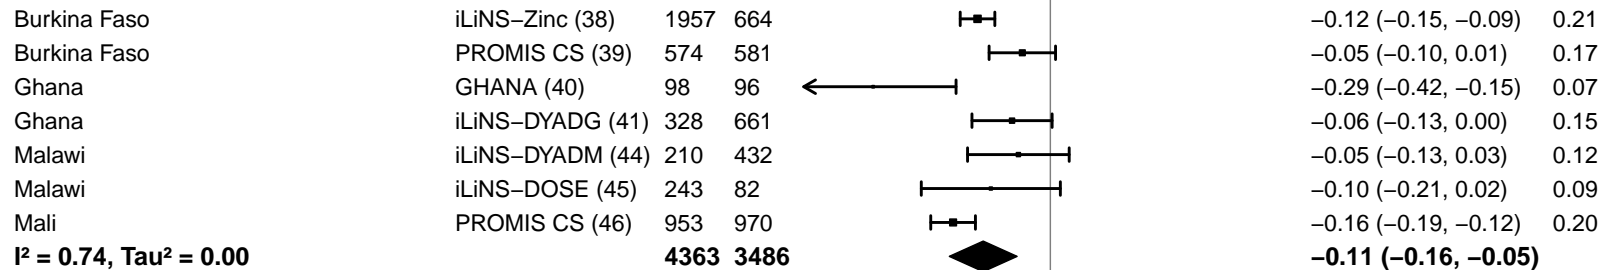

-0.4 -0.2 0 0.2 0.4  
Difference  
Favors LNS Favors Control

Supplemental figure 4C: Anemia prevalence difference

4C4: Stratified by Inflammation burden

**Inflammation burden**

(p-diff = 0.423)

**Inflammation burden – Low**

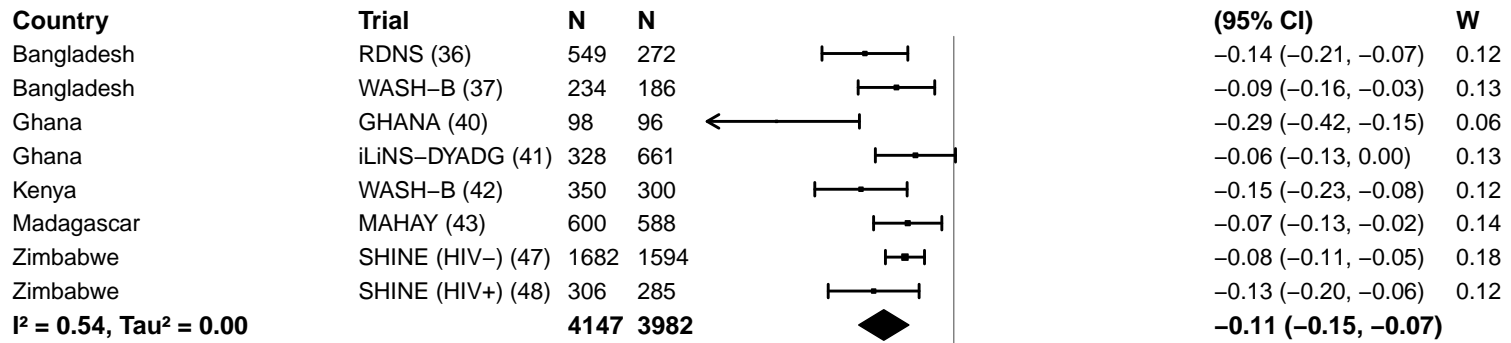

**Inflammation burden – High**

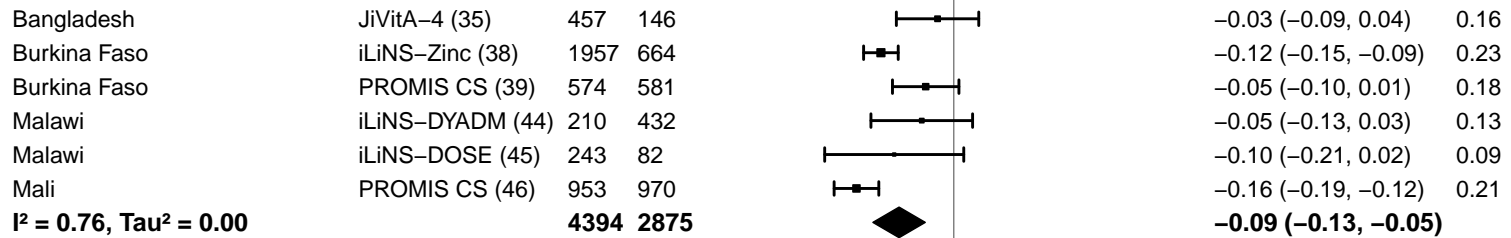

-0.4 -0.2 0 0.2 0.4  
Difference  
Favors LNS Favors Control

Supplemental figure 4C: Anemia prevalence difference

4C5: Stratified by Source water quality

**Source water quality**

(p-diff = 0.943)

**Source water quality – Improved**

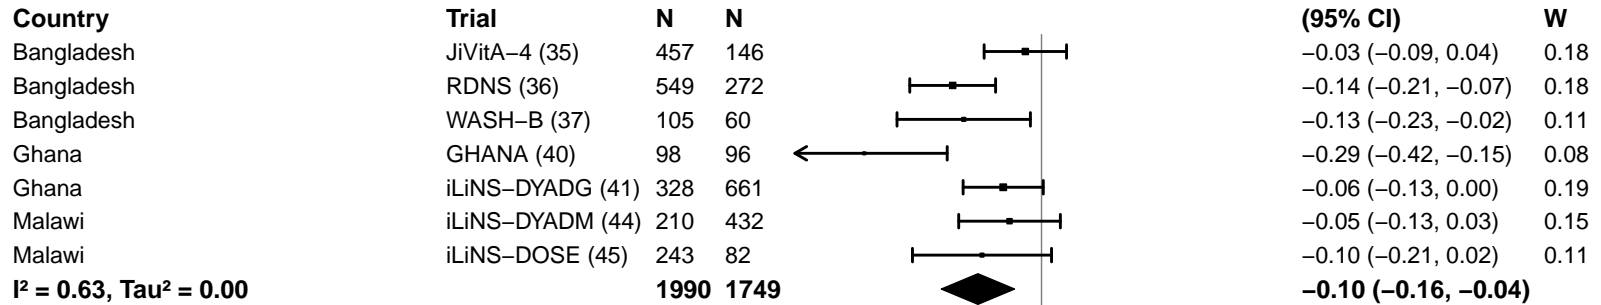

**Source water quality – Unimproved**

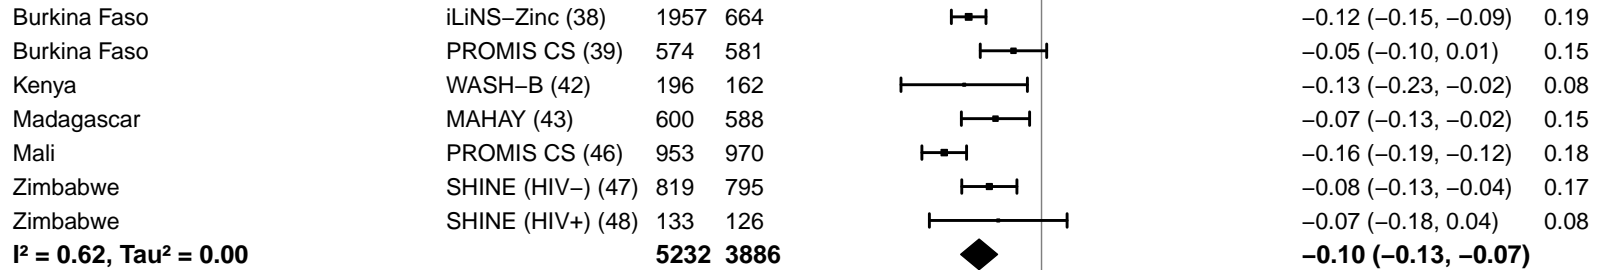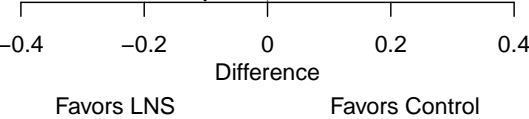



Supplemental figure 4C: Anemia prevalence difference

4C6: Stratified by Sanitation

**Sanitation**  
(p-diff = 0.565)

**Sanitation – Improved**

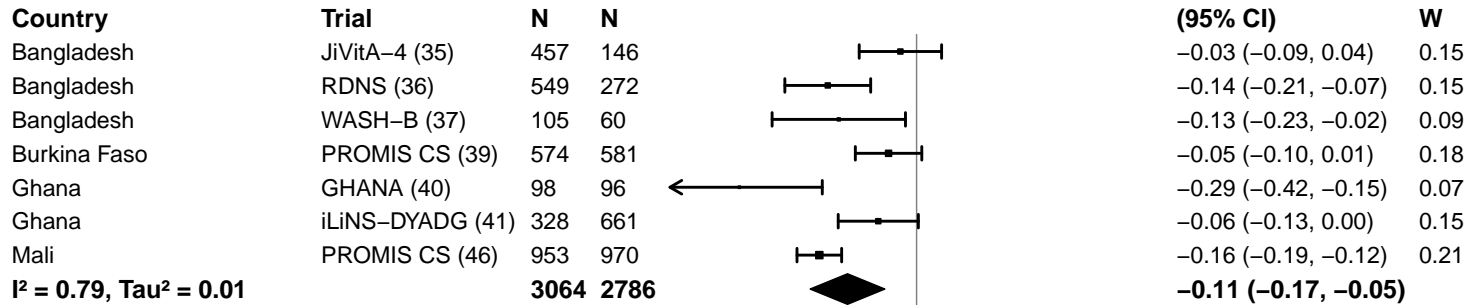

**Sanitation – Unimproved**

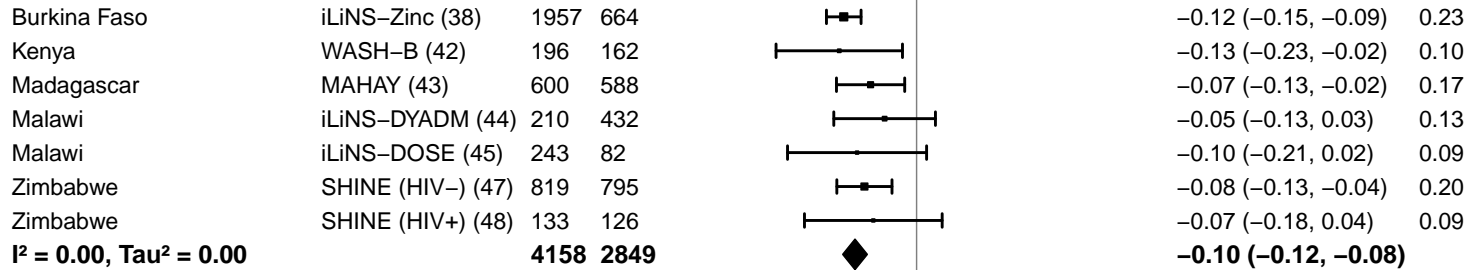

Supplemental figure 4C: Anemia prevalence difference

4C7: Stratified by Supplement duration

**Supplement duration**

(p-diff = 0.018)

**Supplement duration – 12m or less**

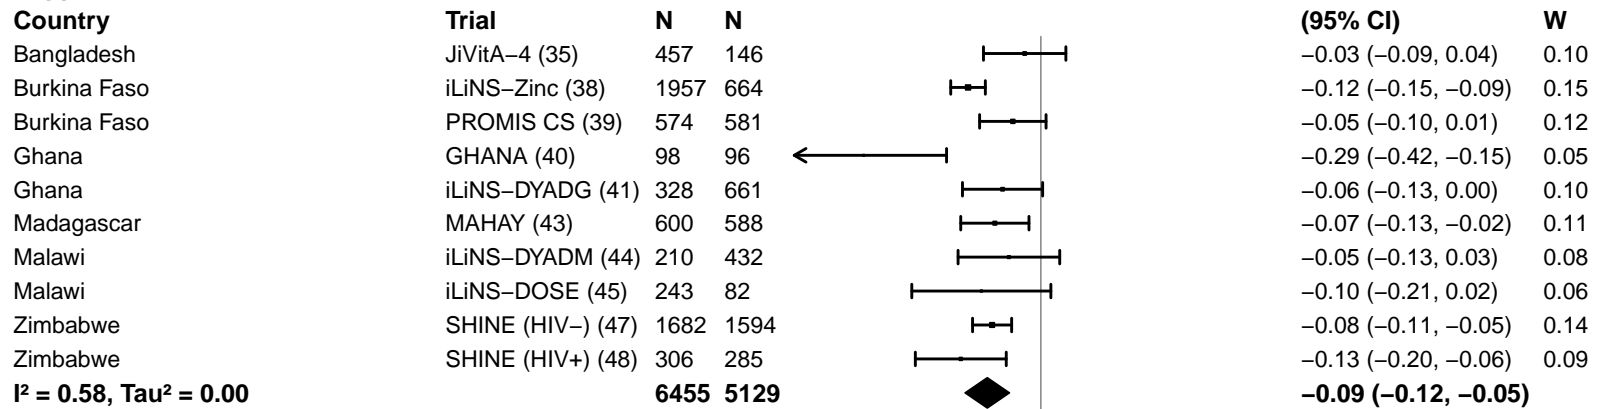

**Supplement duration – > 12m**

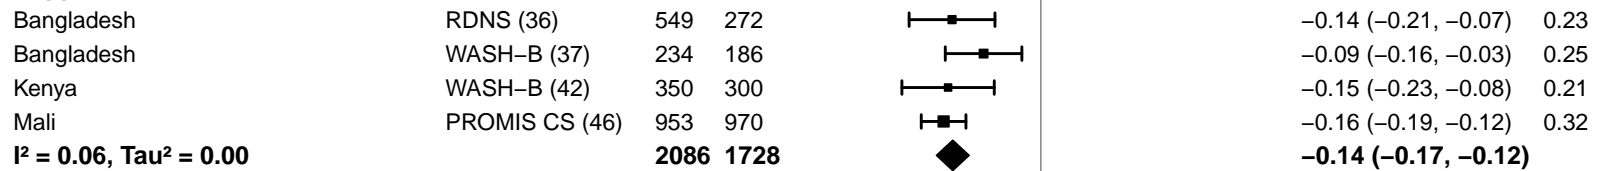

-0.4 -0.2 0 0.2 0.4  
Difference  
Favors LNS Favors Control

Supplemental figure 4C: Anemia prevalence difference

4C8: Stratified by Iron dose

**Iron dose**  
(p-diff = 0.055)

**Iron dose – Less than 9 mg**

| Country      | Trial             | N           | N           | PD (95% CI)                 | W    |
|--------------|-------------------|-------------|-------------|-----------------------------|------|
| Bangladesh   | JiVitA-4 (35)     | 457         | 146         | -0.03 (-0.09, 0.04)         | 0.09 |
| Burkina Faso | iLiNS-Zinc (38)   | 1957        | 664         | -0.12 (-0.15, -0.09)        | 0.13 |
| Burkina Faso | PROMIS CS (39)    | 574         | 581         | -0.05 (-0.10, 0.01)         | 0.11 |
| Ghana        | iLiNS-DYADG (41)  | 328         | 661         | -0.06 (-0.13, 0.00)         | 0.09 |
| Madagascar   | MAHAY (43)        | 600         | 588         | -0.07 (-0.13, -0.02)        | 0.10 |
| Malawi       | iLiNS-DYADM (44)  | 210         | 432         | -0.05 (-0.13, 0.03)         | 0.08 |
| Malawi       | iLiNS-DOSE (45)   | 243         | 82          | -0.10 (-0.21, 0.02)         | 0.05 |
| Mali         | PROMIS CS (46)    | 953         | 970         | -0.16 (-0.19, -0.12)        | 0.13 |
| Zimbabwe     | SHINE (HIV-) (47) | 1682        | 1594        | -0.08 (-0.11, -0.05)        | 0.13 |
| Zimbabwe     | SHINE (HIV+) (48) | 306         | 285         | -0.13 (-0.20, -0.06)        | 0.08 |
|              |                   | <b>7310</b> | <b>6003</b> | <b>-0.09 (-0.12, -0.06)</b> |      |

**I<sup>2</sup> = 0.65, Tau<sup>2</sup> = 0.00**

**Iron dose – 9 mg**

|            |             |             |            |                             |      |
|------------|-------------|-------------|------------|-----------------------------|------|
| Bangladesh | RDNS (36)   | 549         | 272        | -0.14 (-0.21, -0.07)        | 0.29 |
| Bangladesh | WASH-B (37) | 234         | 186        | -0.09 (-0.16, -0.03)        | 0.31 |
| Ghana      | GHANA (40)  | 98          | 96         | -0.29 (-0.42, -0.15)        | 0.14 |
| Kenya      | WASH-B (42) | 350         | 300        | -0.15 (-0.23, -0.08)        | 0.27 |
|            |             | <b>1231</b> | <b>854</b> | <b>-0.15 (-0.23, -0.08)</b> |      |

**I<sup>2</sup> = 0.57, Tau<sup>2</sup> = 0.00**

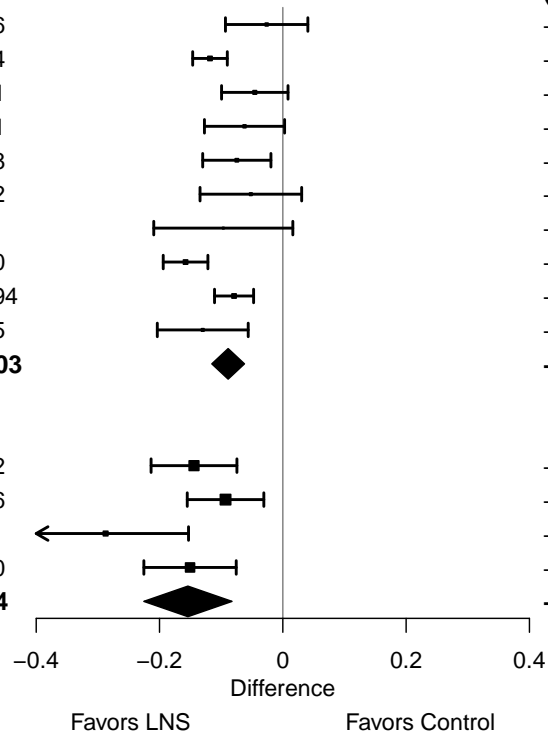

Supplemental figure 4C: Anemia prevalence difference

4C9: Stratified by Frequency of contact

**Frequency of contact**

(p-diff = 0.524)

**Frequency of contact – Monthly**

| Country      | Trial             | N           | N           |
|--------------|-------------------|-------------|-------------|
| Bangladesh   | RDNS (36)         | 549         | 272         |
| Burkina Faso | PROMIS CS (39)    | 574         | 581         |
| Kenya        | WASH-B (42)       | 350         | 300         |
| Madagascar   | MAHAY (43)        | 600         | 588         |
| Mali         | PROMIS CS (46)    | 953         | 970         |
| Zimbabwe     | SHINE (HIV-) (47) | 1682        | 1594        |
| Zimbabwe     | SHINE (HIV+) (48) | 306         | 285         |
|              |                   | <b>5014</b> | <b>4590</b> |

**I<sup>2</sup> = 0.69, Tau<sup>2</sup> = 0.00**

**PD**

| (95% CI)                    | W    |
|-----------------------------|------|
| -0.14 (-0.21, -0.07)        | 0.12 |
| -0.05 (-0.10, 0.01)         | 0.15 |
| -0.15 (-0.23, -0.08)        | 0.12 |
| -0.07 (-0.13, -0.02)        | 0.14 |
| -0.16 (-0.19, -0.12)        | 0.17 |
| -0.08 (-0.11, -0.05)        | 0.18 |
| -0.13 (-0.20, -0.06)        | 0.12 |
| <b>-0.11 (-0.14, -0.08)</b> |      |

**Frequency of contact – Weekly**

|              |                  |             |             |
|--------------|------------------|-------------|-------------|
| Bangladesh   | JiVitA-4 (35)    | 457         | 146         |
| Bangladesh   | WASH-B (37)      | 234         | 186         |
| Burkina Faso | iLiNS-Zinc (38)  | 1957        | 664         |
| Ghana        | GHANA (40)       | 98          | 96          |
| Ghana        | iLiNS-DYADG (41) | 328         | 661         |
| Malawi       | iLiNS-DYADM (44) | 210         | 432         |
| Malawi       | iLiNS-DOSE (45)  | 243         | 82          |
|              |                  | <b>3527</b> | <b>2267</b> |

**I<sup>2</sup> = 0.63, Tau<sup>2</sup> = 0.00**

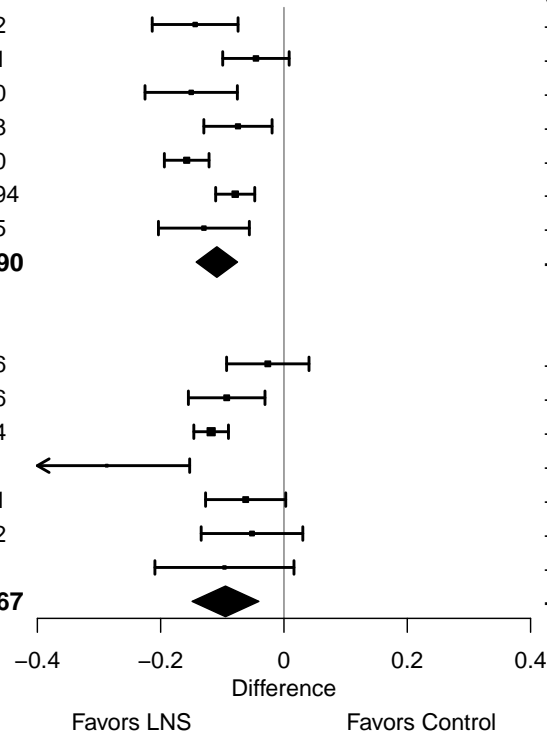

Supplemental figure 4C: Anemia prevalence difference

4C10: Stratified by Average SQ-LNS compliance

**Average SQ-LNS compliance**

( $p$ -diff = 0.327)

**Average SQ-LNS compliance – Low**

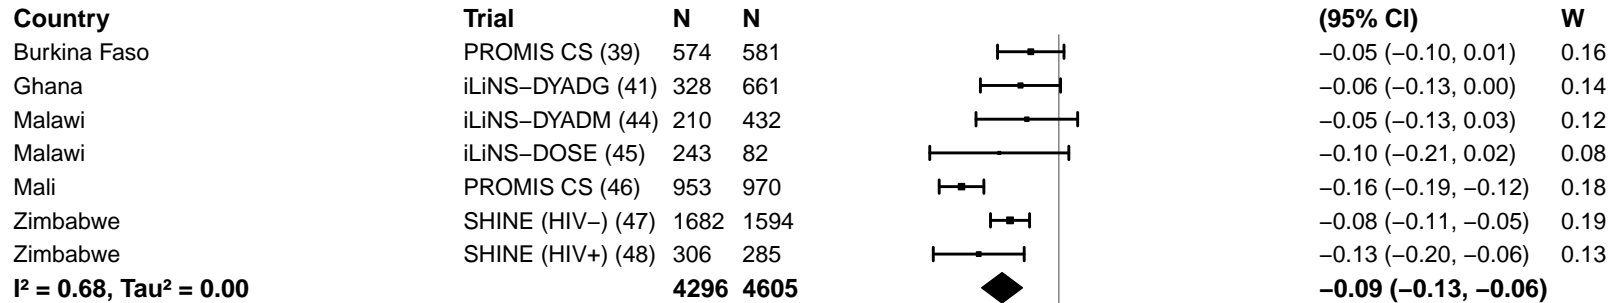

**Average SQ-LNS compliance – High**

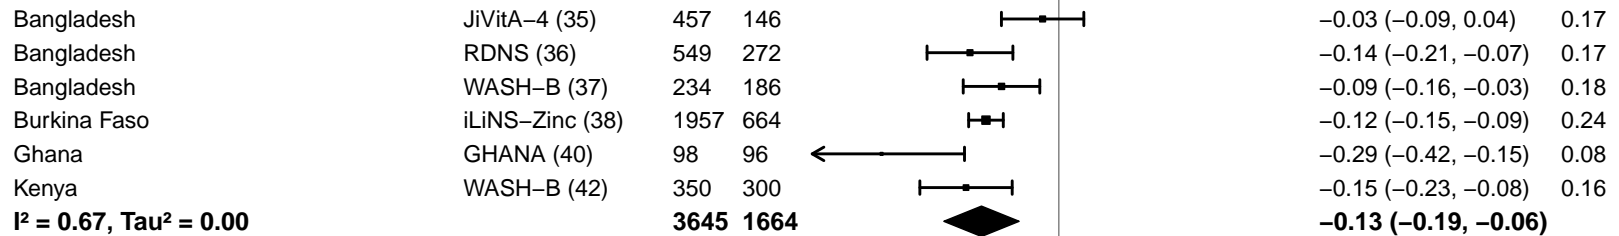

-0.4 -0.2 0 0.2 0.4  
Difference  
Favors LNS Favors Control

## Supplemental figure 4D: Moderate-to-severe anemia prevalence ratio

4D1: Stratified by Geographic region (insufficient comparisons)

Supplemental figure 4D: Moderate-to-severe anemia prevalence ratio

4D2: Stratified by Anemia burden

**Anemia burden**  
(p-diff = 0.388)

**Anemia burden – Moderate**

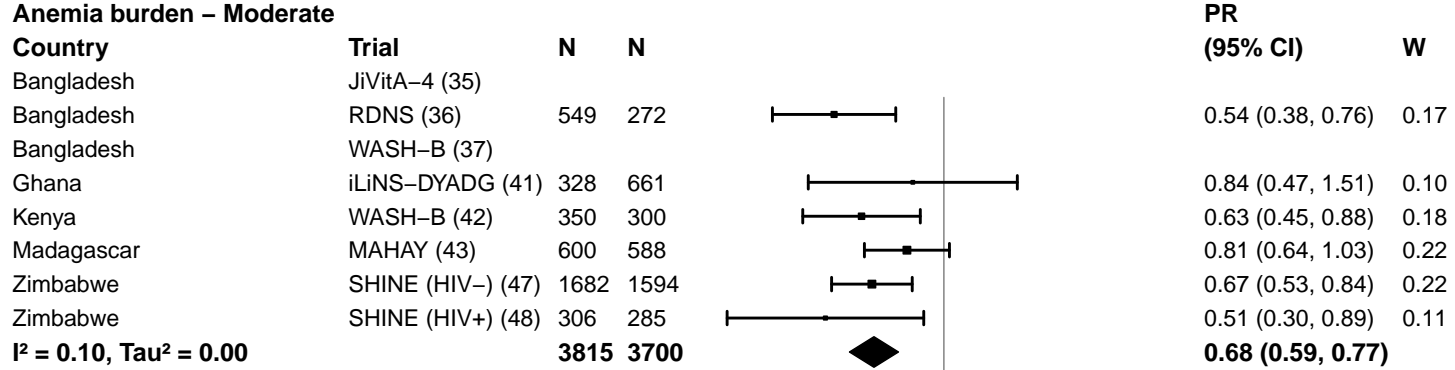

**Anemia burden – High**

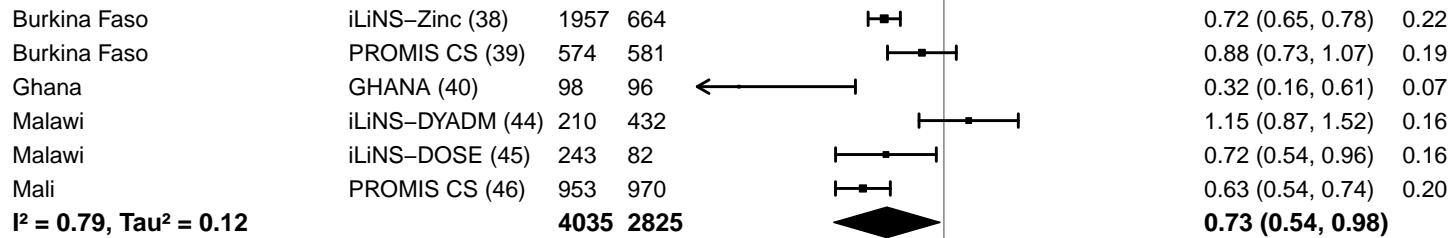

0.25 0.50 1.0 2.0 4.0  
Ratio  
Favors LNS Favors Control

Supplemental figure 4D: Moderate-to-severe anemia prevalence ratio

4D3: Stratified by Malaria prevalence

**Malaria prevalence**

( $p$ -diff = 0.282)

**Malaria prevalence – Less than 10%**

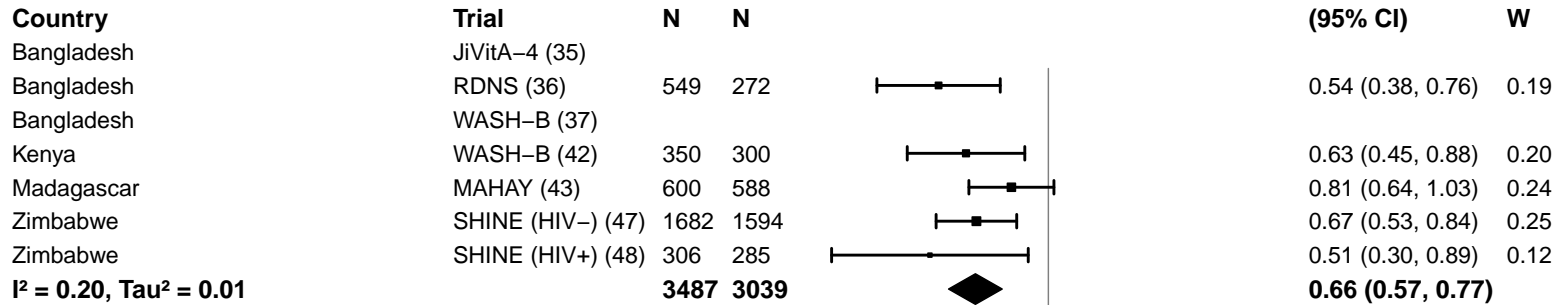

**Malaria prevalence – At least 10%**

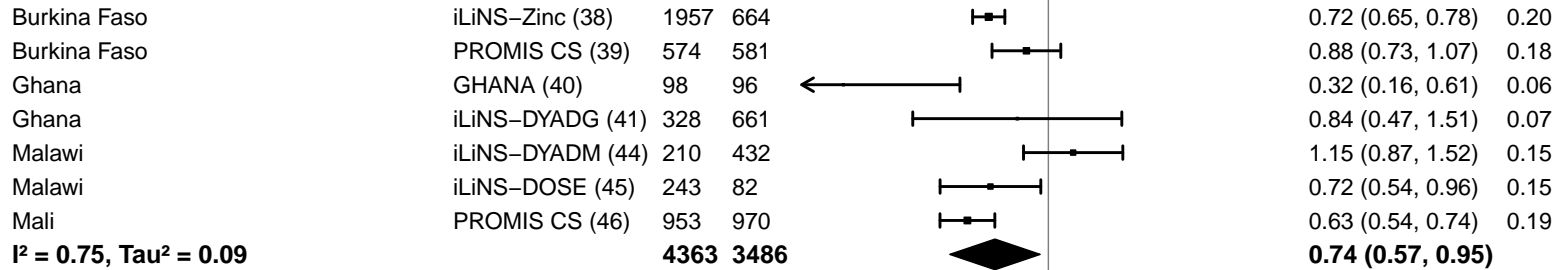



Supplemental figure 4D: Moderate-to-severe anemia prevalence ratio

4D4: Stratified by Inflammation burden

**Inflammation burden**

(p-diff = 0.100)

**Inflammation burden – Low**

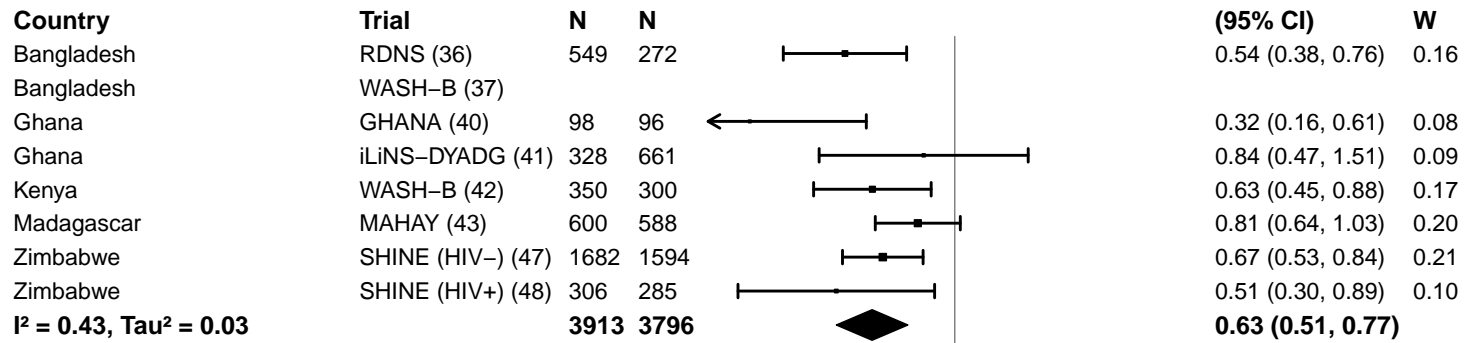

**Inflammation burden – High**

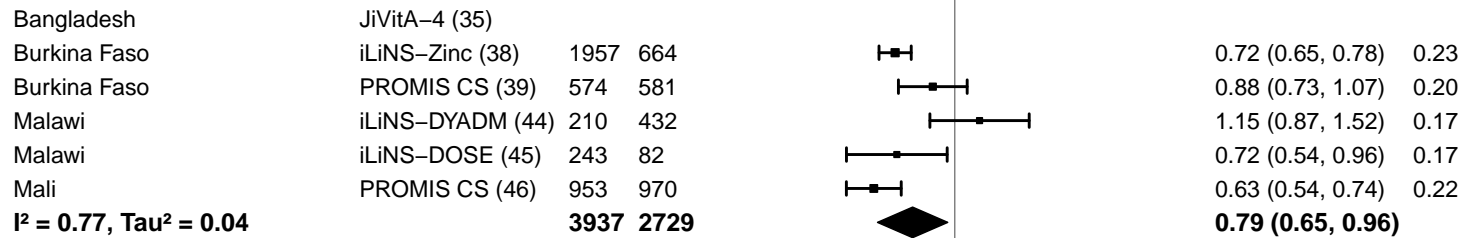

0.25 0.50 1.0 2.0 4.0  
Ratio  
Favors LNS Favors Control

Supplemental figure 4D: Moderate-to-severe anemia prevalence ratio

4D5: Stratified by Source water quality

**Source water quality**

(p-diff = 0.934)

**Source water quality – Improved**

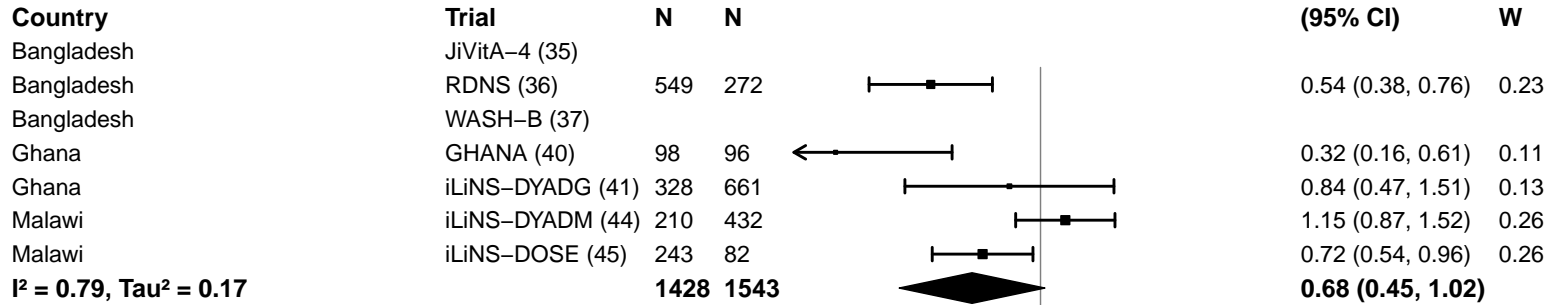

**Source water quality – Unimproved**

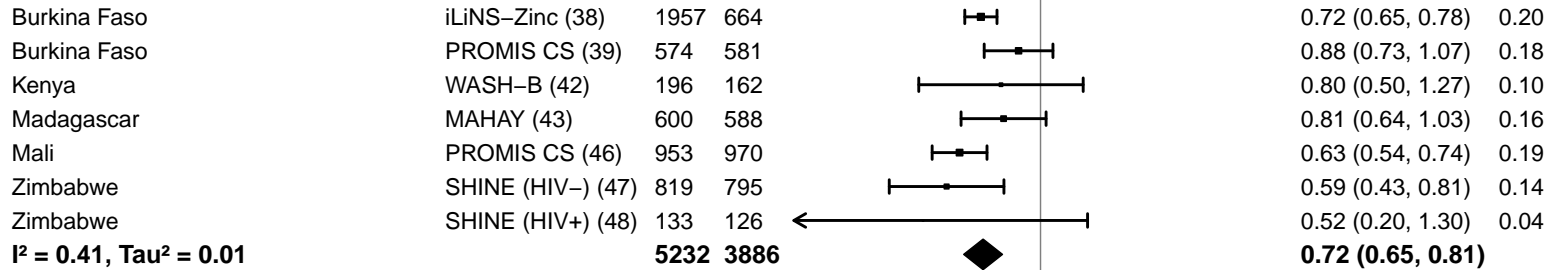

Supplemental figure 4D: Moderate-to-severe anemia prevalence ratio

4D6: Stratified by Sanitation

**Sanitation**  
( $p$ -diff = 0.290)

**Sanitation – Improved**

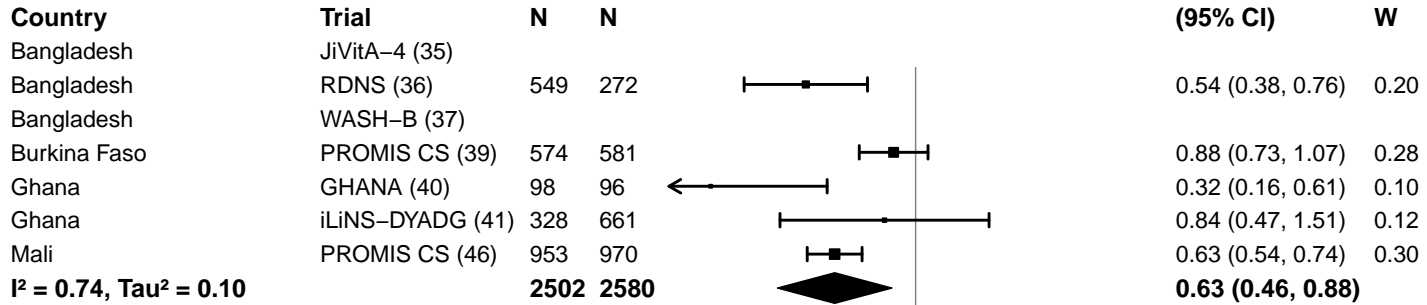

**Sanitation – Unimproved**

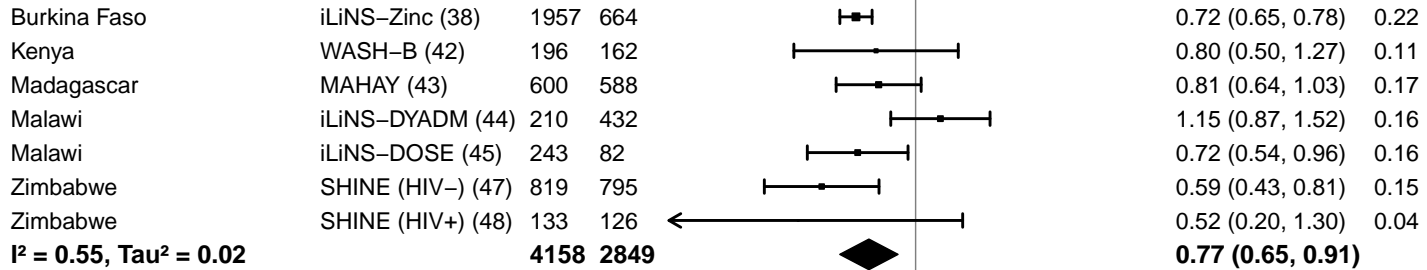

0.25 0.50 1.0 2.0 4.0  
Ratio  
Favors LNS Favors Control

Supplemental figure 4D: Moderate-to-severe anemia prevalence ratio

4D7: Stratified by Supplement duration

**Supplement duration**

(p-diff = 0.088)

**Supplement duration – 12m or less**

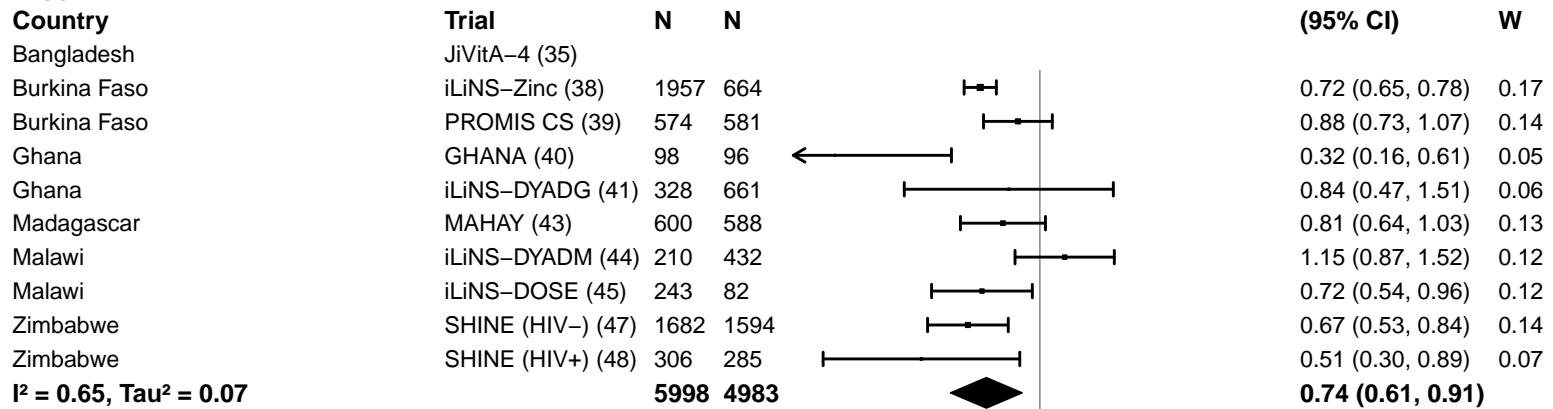

**Supplement duration – > 12m**

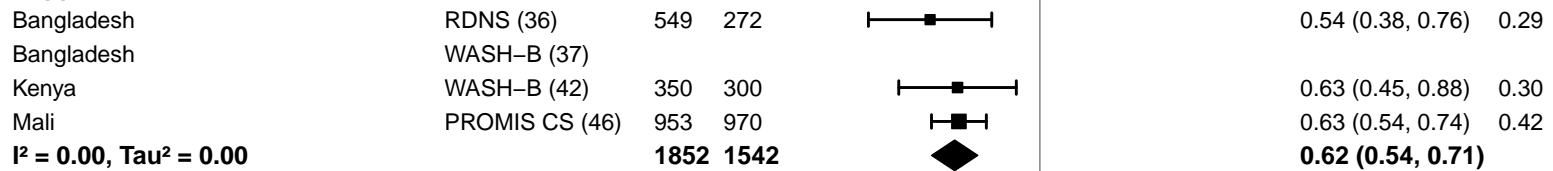

Supplemental figure 4D: Moderate-to-severe anemia prevalence ratio

4D8: Stratified by Iron dose

**Iron dose**

(p-diff = 0.025)

**Iron dose – Less than 9 mg**

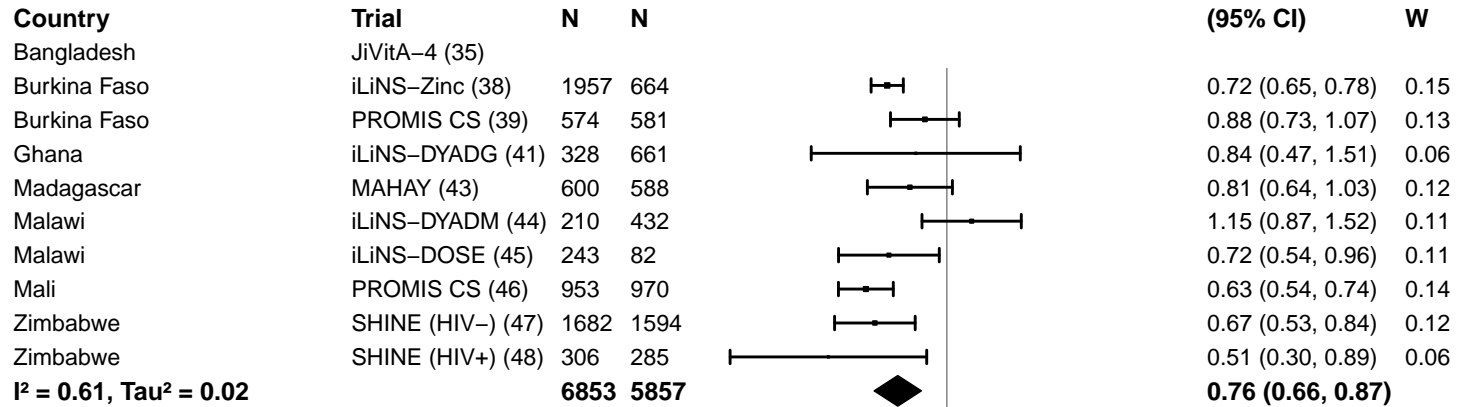

**Iron dose – 9 mg**

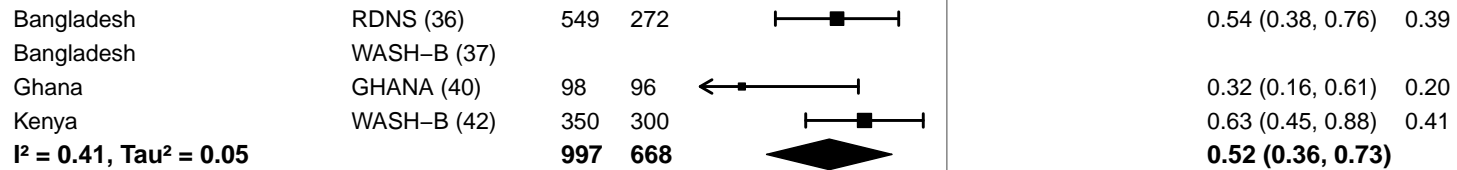

Supplemental figure 4D: Moderate-to-severe anemia prevalence ratio

4D9: Stratified by Frequency of contact

**Frequency of contact**

(p-diff = 0.459)

**Frequency of contact – Monthly**

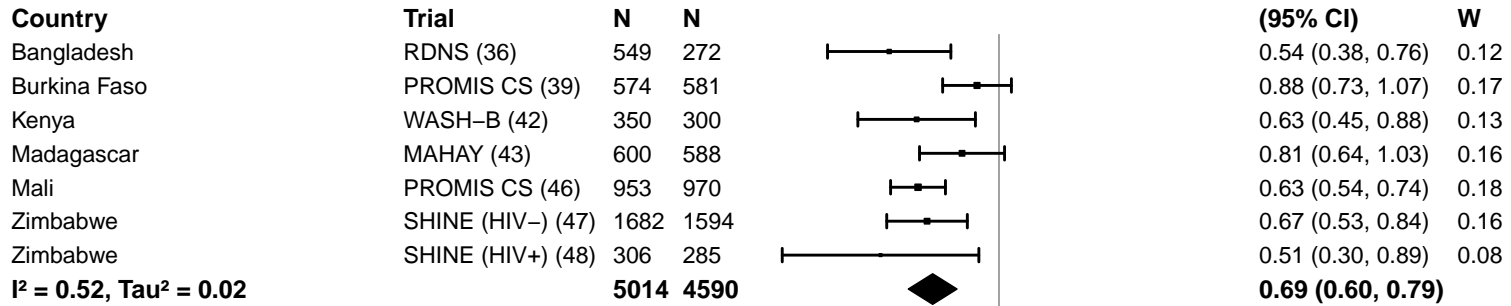

**Frequency of contact – Weekly**

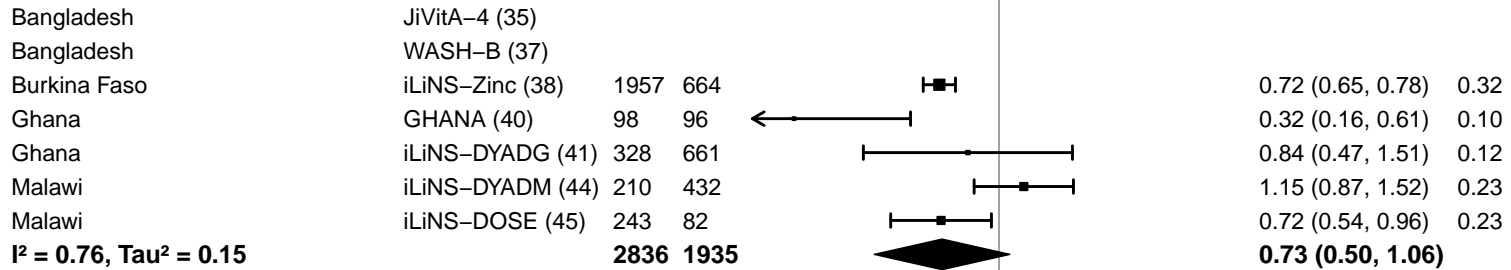

Supplemental figure 4D: Moderate-to-severe anemia prevalence ratio

4D10: Stratified by Average SQ-LNS compliance

**Average SQ-LNS compliance**  
(p-diff = 0.115)

**Average SQ-LNS compliance – Low**

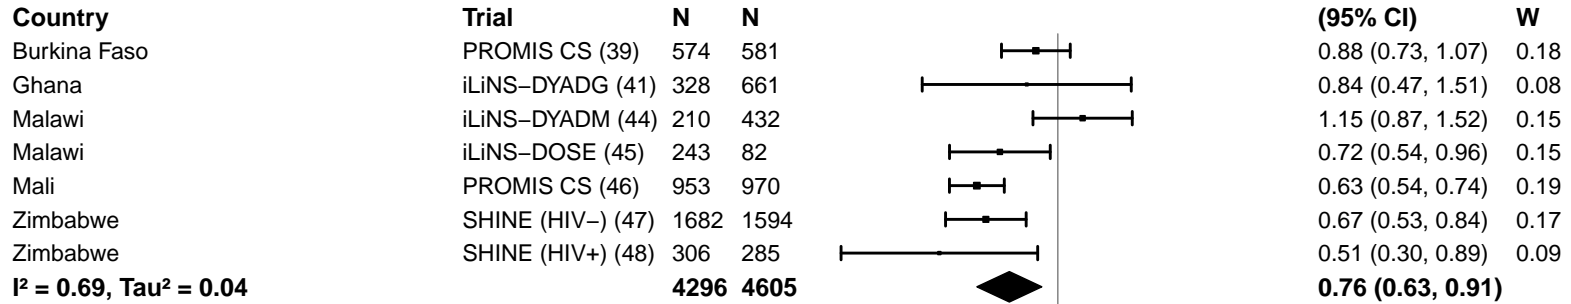

**Average SQ-LNS compliance – High**

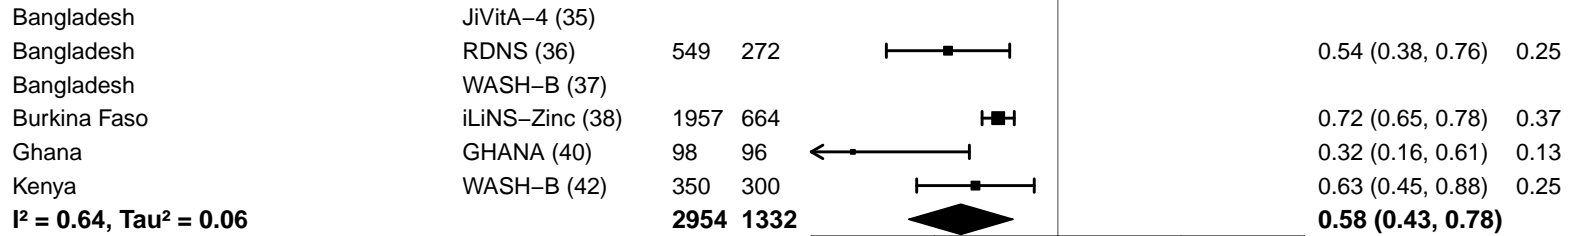

**Supplemental figure 4E: Moderate-to-severe anemia prevalence difference**  
**4E1: Stratified by Geographic region (insufficient comparisons)**



Supplemental figure 4E: Moderate-to-severe anemia prevalence difference

4E2: Stratified by Anemia burden

**Anemia burden**

(p-diff = 0.065)

**Anemia burden – Moderate**

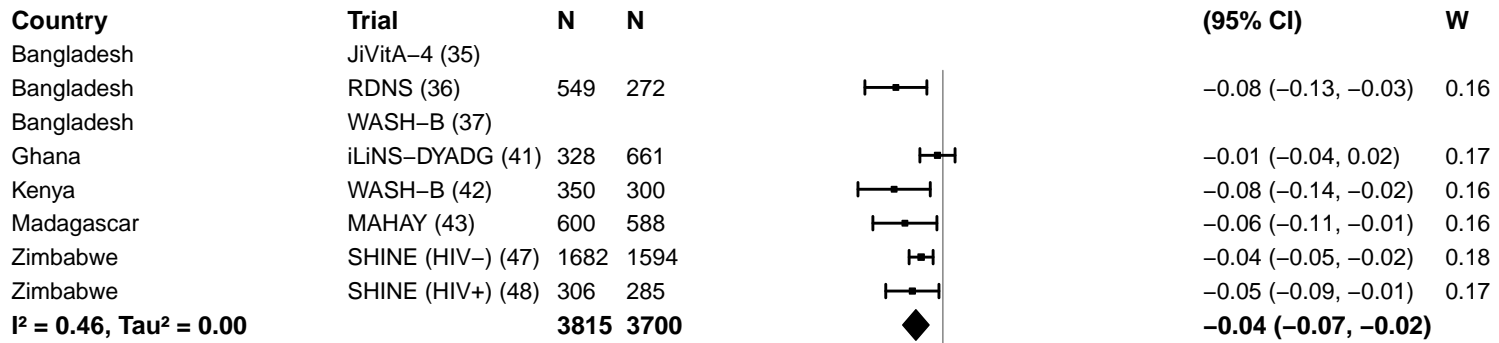

**Anemia burden – High**

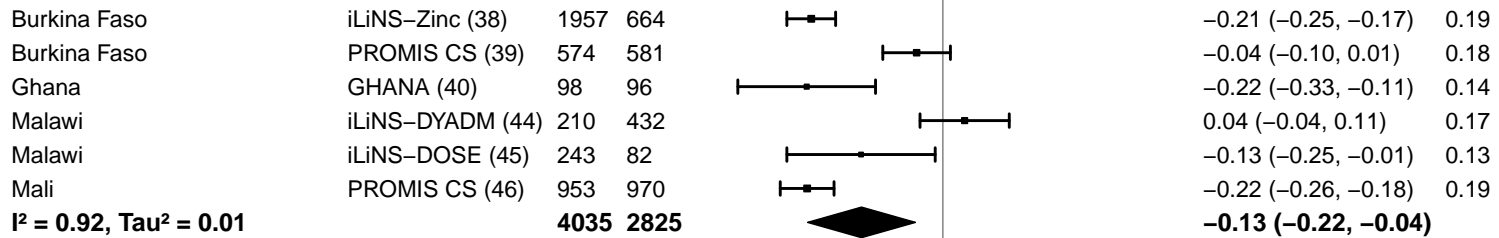

Supplemental figure 4E: Moderate-to-severe anemia prevalence difference

4E3: Stratified by Malaria prevalence

**Malaria prevalence**

(p-diff = 0.293)

**Malaria prevalence – Less than 10%**

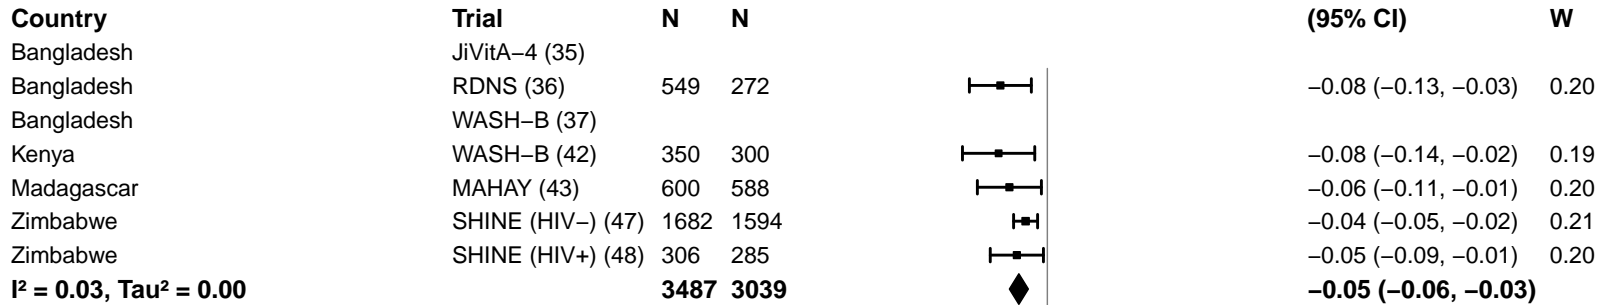

**Malaria prevalence – At least 10%**

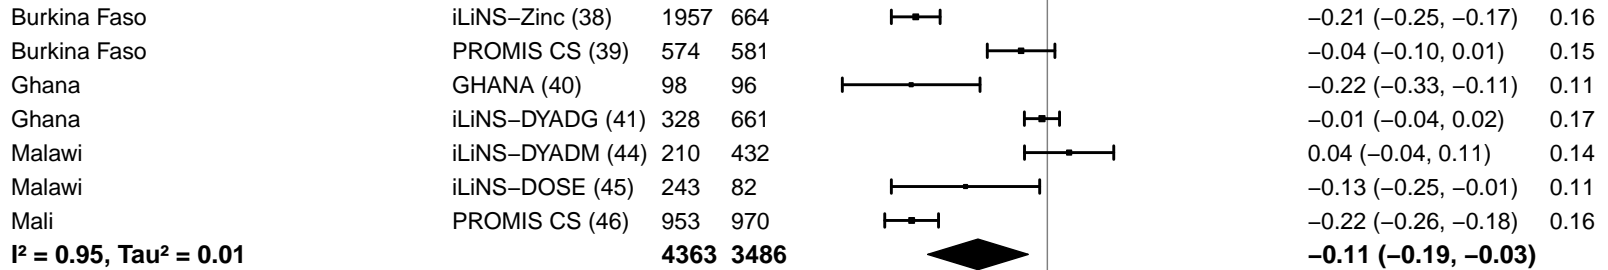

Supplemental figure 4E: Moderate-to-severe anemia prevalence difference

4E4: Stratified by Inflammation burden

**Inflammation burden**

(p-diff = 0.312)

**Inflammation burden – Low**

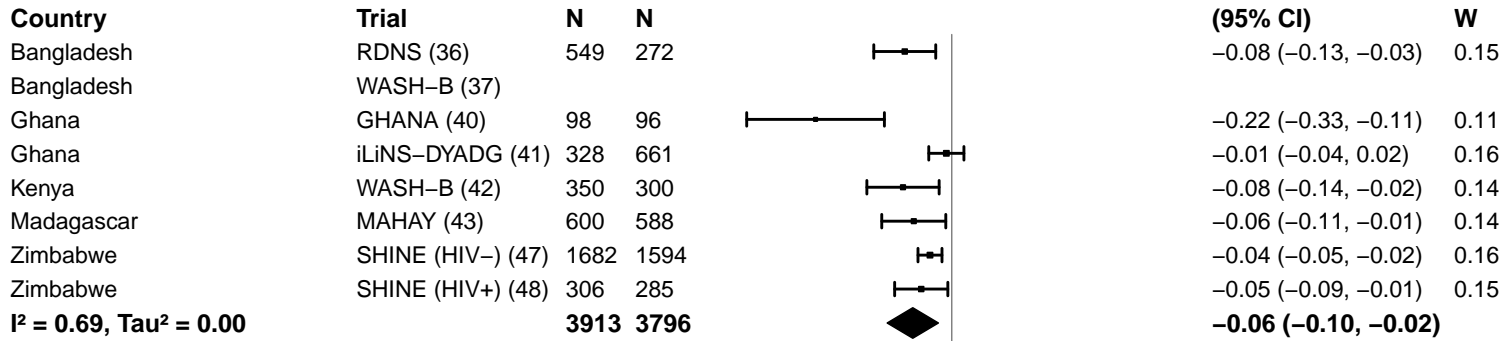

**Inflammation burden – High**

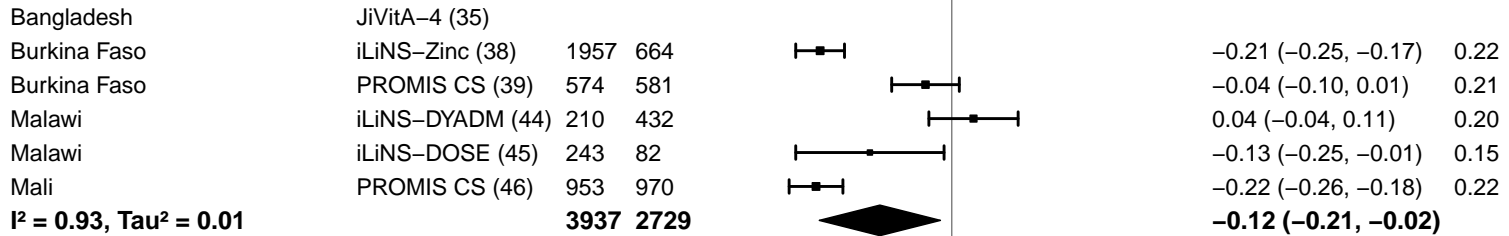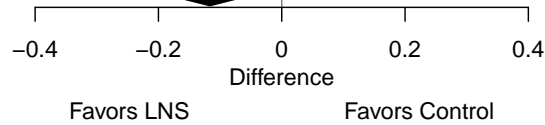

Supplemental figure 4E: Moderate-to-severe anemia prevalence difference

4E5: Stratified by Source water quality

**Source water quality**

(p-diff = 0.626)

**Source water quality – Improved**

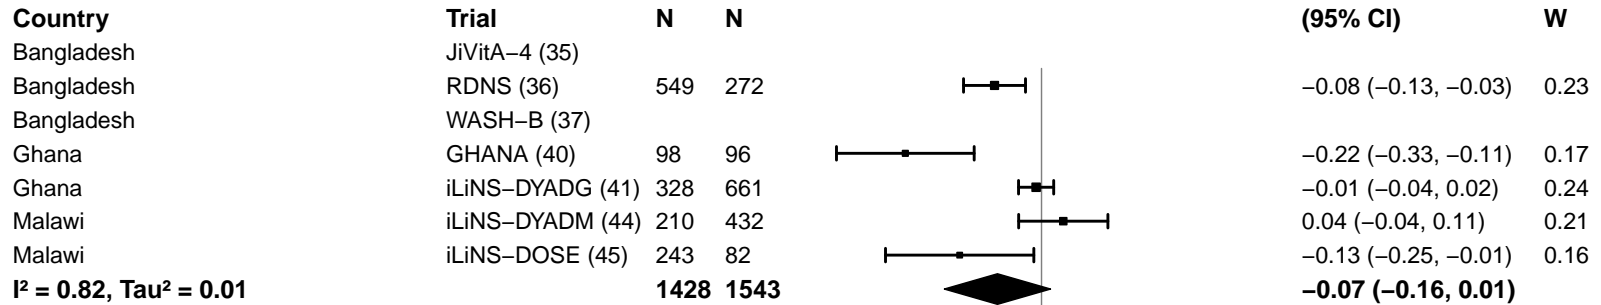

**Source water quality – Unimproved**

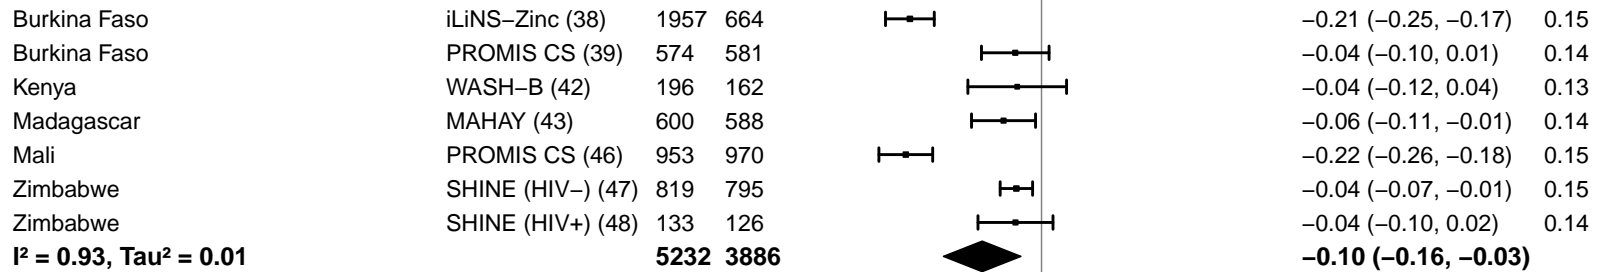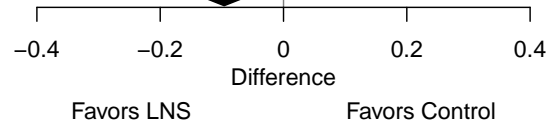

Supplemental figure 4E: Moderate-to-severe anemia prevalence difference

4E6: Stratified by Sanitation

**Sanitation**  
(p-diff = 0.481)

**Sanitation – Improved**

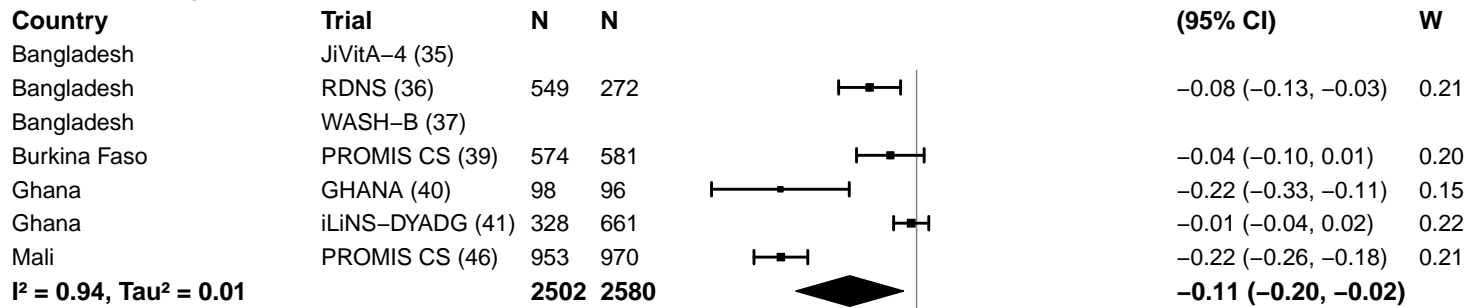

**Sanitation – Unimproved**

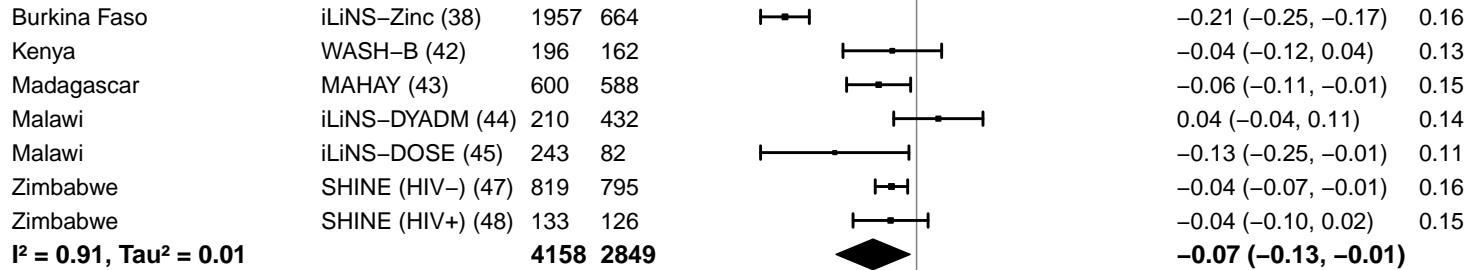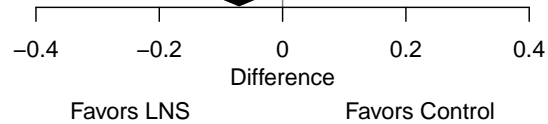

Supplemental figure 4E: Moderate-to-severe anemia prevalence difference

4E7: Stratified by Supplement duration

**Supplement duration**

(p-diff = 0.363)

**Supplement duration – 12m or less**

| Country      | Trial             | N           | N           |
|--------------|-------------------|-------------|-------------|
| Bangladesh   | JiVitA-4 (35)     |             |             |
| Burkina Faso | iLiNS-Zinc (38)   | 1957        | 664         |
| Burkina Faso | PROMIS CS (39)    | 574         | 581         |
| Ghana        | GHANA (40)        | 98          | 96          |
| Ghana        | iLiNS-DYADG (41)  | 328         | 661         |
| Madagascar   | MAHAY (43)        | 600         | 588         |
| Malawi       | iLiNS-DYADM (44)  | 210         | 432         |
| Malawi       | iLiNS-DOSE (45)   | 243         | 82          |
| Zimbabwe     | SHINE (HIV-) (47) | 1682        | 1594        |
| Zimbabwe     | SHINE (HIV+) (48) | 306         | 285         |
|              |                   | <b>5998</b> | <b>4983</b> |

**I<sup>2</sup> = 0.91, Tau<sup>2</sup> = 0.01**

**Supplement duration – > 12m**

|            |                |             |             |
|------------|----------------|-------------|-------------|
| Bangladesh | RDNS (36)      | 549         | 272         |
| Bangladesh | WASH-B (37)    |             |             |
| Kenya      | WASH-B (42)    | 350         | 300         |
| Mali       | PROMIS CS (46) | 953         | 970         |
|            |                | <b>1852</b> | <b>1542</b> |

**I<sup>2</sup> = 0.91, Tau<sup>2</sup> = 0.01**

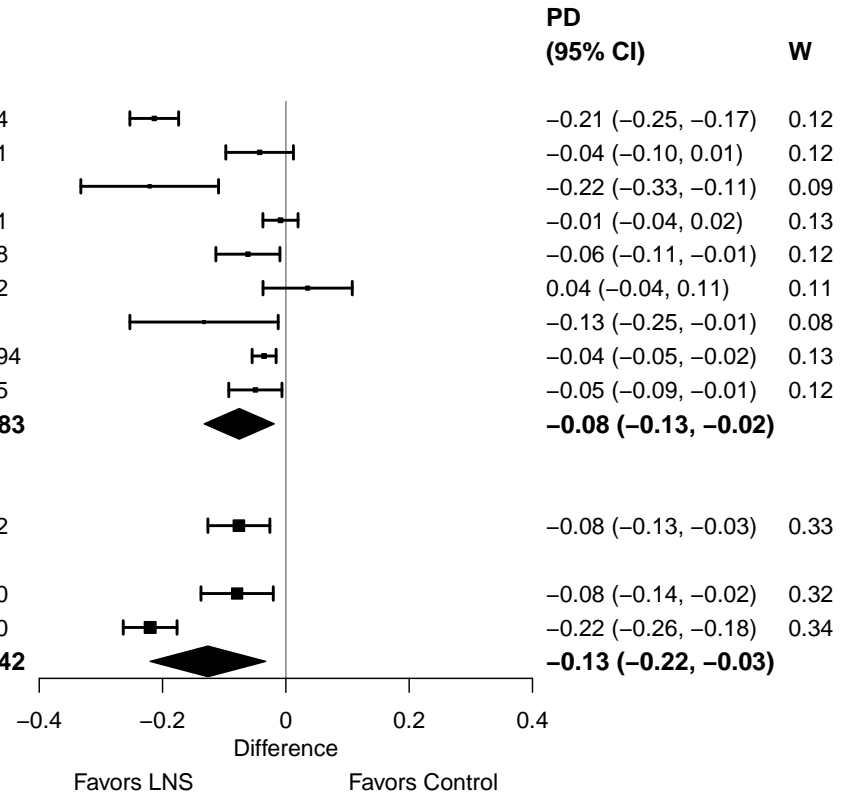

Supplemental figure 4E: Moderate-to-severe anemia prevalence difference

4E8: Stratified by Iron dose

**Iron dose**  
(p-diff = 0.542)

**Iron dose – Less than 9 mg**

| Country      | Trial             | N           | N           | PD (95% CI)                 | W    |
|--------------|-------------------|-------------|-------------|-----------------------------|------|
| Bangladesh   | JiVitA-4 (35)     |             |             |                             |      |
| Burkina Faso | iLiNS-Zinc (38)   | 1957        | 664         | -0.21 (-0.25, -0.17)        | 0.12 |
| Burkina Faso | PROMIS CS (39)    | 574         | 581         | -0.04 (-0.10, 0.01)         | 0.11 |
| Ghana        | iLiNS-DYADG (41)  | 328         | 661         | -0.01 (-0.04, 0.02)         | 0.12 |
| Madagascar   | MAHAY (43)        | 600         | 588         | -0.06 (-0.11, -0.01)        | 0.11 |
| Malawi       | iLiNS-DYADM (44)  | 210         | 432         | 0.04 (-0.04, 0.11)          | 0.10 |
| Malawi       | iLiNS-DOSE (45)   | 243         | 82          | -0.13 (-0.25, -0.01)        | 0.08 |
| Mali         | PROMIS CS (46)    | 953         | 970         | -0.22 (-0.26, -0.18)        | 0.12 |
| Zimbabwe     | SHINE (HIV-) (47) | 1682        | 1594        | -0.04 (-0.05, -0.02)        | 0.12 |
| Zimbabwe     | SHINE (HIV+) (48) | 306         | 285         | -0.05 (-0.09, -0.01)        | 0.12 |
|              |                   | <b>6853</b> | <b>5857</b> | <b>-0.08 (-0.14, -0.02)</b> |      |

**I<sup>2</sup> = 0.94, Tau<sup>2</sup> = 0.01**

**Iron dose – 9 mg**

|            |             |            |            |                             |      |
|------------|-------------|------------|------------|-----------------------------|------|
| Bangladesh | RDNS (36)   | 549        | 272        | -0.08 (-0.13, -0.03)        | 0.37 |
| Bangladesh | WASH-B (37) |            |            |                             |      |
| Ghana      | GHANA (40)  | 98         | 96         | -0.22 (-0.33, -0.11)        | 0.27 |
| Kenya      | WASH-B (42) | 350        | 300        | -0.08 (-0.14, -0.02)        | 0.36 |
|            |             | <b>997</b> | <b>668</b> | <b>-0.11 (-0.20, -0.03)</b> |      |

**I<sup>2</sup> = 0.65, Tau<sup>2</sup> = 0.00**

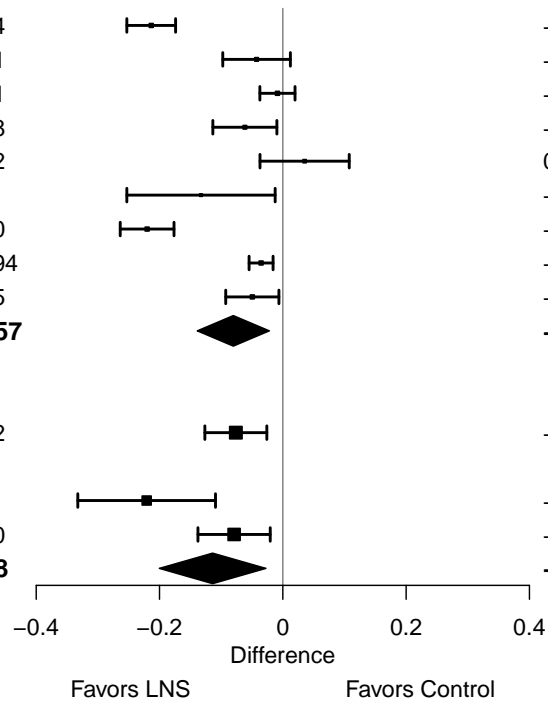

Supplemental figure 4E: Moderate-to-severe anemia prevalence difference

4E9: Stratified by Frequency of contact

**Frequency of contact**

(p-diff = 0.680)

**Frequency of contact – Monthly**

| Country      | Trial             | N           | N           |
|--------------|-------------------|-------------|-------------|
| Bangladesh   | RDNS (36)         | 549         | 272         |
| Burkina Faso | PROMIS CS (39)    | 574         | 581         |
| Kenya        | WASH-B (42)       | 350         | 300         |
| Madagascar   | MAHAY (43)        | 600         | 588         |
| Mali         | PROMIS CS (46)    | 953         | 970         |
| Zimbabwe     | SHINE (HIV-) (47) | 1682        | 1594        |
| Zimbabwe     | SHINE (HIV+) (48) | 306         | 285         |
|              |                   | <b>5014</b> | <b>4590</b> |

**I<sup>2</sup> = 0.90, Tau<sup>2</sup> = 0.00**

**PD**

| (95% CI)                    | W    |
|-----------------------------|------|
| -0.08 (-0.13, -0.03)        | 0.14 |
| -0.04 (-0.10, 0.01)         | 0.14 |
| -0.08 (-0.14, -0.02)        | 0.14 |
| -0.06 (-0.11, -0.01)        | 0.14 |
| -0.22 (-0.26, -0.18)        | 0.14 |
| -0.04 (-0.05, -0.02)        | 0.15 |
| -0.05 (-0.09, -0.01)        | 0.14 |
| <b>-0.08 (-0.13, -0.03)</b> |      |

**Frequency of contact – Weekly**

|              |                  |             |             |
|--------------|------------------|-------------|-------------|
| Bangladesh   | JiVitA-4 (35)    |             |             |
| Bangladesh   | WASH-B (37)      |             |             |
| Burkina Faso | iLiNS-Zinc (38)  | 1957        | 664         |
| Ghana        | GHANA (40)       | 98          | 96          |
| Ghana        | iLiNS-DYADG (41) | 328         | 661         |
| Malawi       | iLiNS-DYADM (44) | 210         | 432         |
| Malawi       | iLiNS-DOSE (45)  | 243         | 82          |
|              |                  | <b>2836</b> | <b>1935</b> |

**I<sup>2</sup> = 0.95, Tau<sup>2</sup> = 0.01**

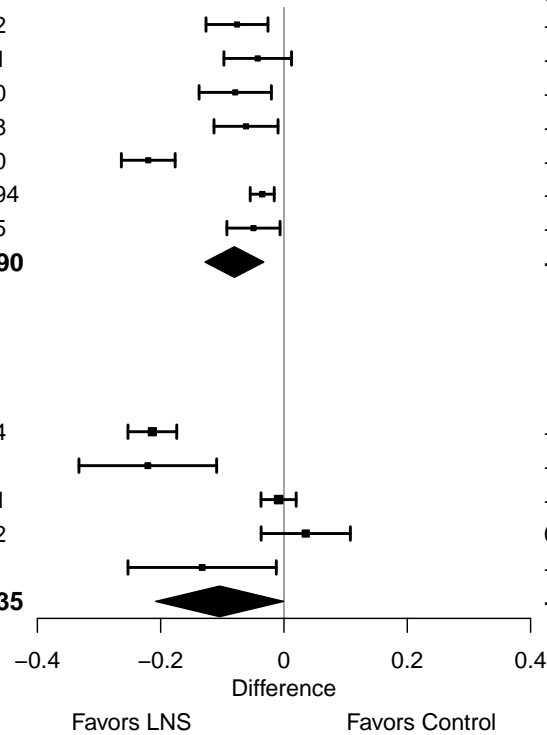



Supplemental figure 4E: Moderate-to-severe anemia prevalence difference

4E10: Stratified by Average SQ-LNS compliance

**Average SQ-LNS compliance**

( $p$ -diff = 0.128)

**Average SQ-LNS compliance – Low**

| Country      | Trial             | N           | N           | PD (95% CI)                | W    |
|--------------|-------------------|-------------|-------------|----------------------------|------|
| Burkina Faso | PROMIS CS (39)    | 574         | 581         | -0.04 (-0.10, 0.01)        | 0.14 |
| Ghana        | iLiNS-DYADG (41)  | 328         | 661         | -0.01 (-0.04, 0.02)        | 0.16 |
| Malawi       | iLiNS-DYADM (44)  | 210         | 432         | 0.04 (-0.04, 0.11)         | 0.13 |
| Malawi       | iLiNS-DOSE (45)   | 243         | 82          | -0.13 (-0.25, -0.01)       | 0.10 |
| Mali         | PROMIS CS (46)    | 953         | 970         | -0.22 (-0.26, -0.18)       | 0.15 |
| Zimbabwe     | SHINE (HIV-) (47) | 1682        | 1594        | -0.04 (-0.05, -0.02)       | 0.16 |
| Zimbabwe     | SHINE (HIV+) (48) | 306         | 285         | -0.05 (-0.09, -0.01)       | 0.15 |
|              |                   | <b>4296</b> | <b>4605</b> | <b>-0.06 (-0.13, 0.00)</b> |      |

$I^2 = 0.92$ ,  $Tau^2 = 0.01$

**Average SQ-LNS compliance – High**

|              |                 |             |             |                             |      |
|--------------|-----------------|-------------|-------------|-----------------------------|------|
| Bangladesh   | JiVitA-4 (35)   |             |             |                             |      |
| Bangladesh   | RDNS (36)       | 549         | 272         | -0.08 (-0.13, -0.03)        | 0.27 |
| Bangladesh   | WASH-B (37)     |             |             |                             |      |
| Burkina Faso | iLiNS-Zinc (38) | 1957        | 664         | -0.21 (-0.25, -0.17)        | 0.28 |
| Ghana        | GHANA (40)      | 98          | 96          | -0.22 (-0.33, -0.11)        | 0.20 |
| Kenya        | WASH-B (42)     | 350         | 300         | -0.08 (-0.14, -0.02)        | 0.26 |
|              |                 | <b>2954</b> | <b>1332</b> | <b>-0.14 (-0.22, -0.06)</b> |      |

$I^2 = 0.88$ ,  $Tau^2 = 0.01$

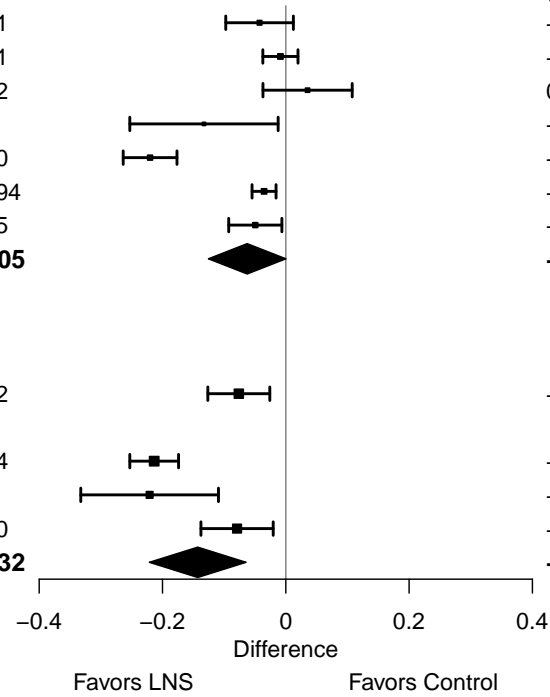

## Supplemental figure 4F: Geometric mean ratio of ferritin concentration

### 4F1: Stratified by Geographic region

**Geographic region**  
(p-diff = 0.800)

**Geographic region – SEAR**

| Country    | Trial         | N           | N          |
|------------|---------------|-------------|------------|
| Bangladesh | JiVitA-4 (35) | 455         | 144        |
| Bangladesh | RDNS (36)     | 550         | 272        |
| Bangladesh | WASH-B (37)   | 212         | 178        |
|            |               | <b>1217</b> | <b>594</b> |

**I<sup>2</sup> = 0.53, Tau<sup>2</sup> = 0.01**

**Geographic region – AFR**

|              |                   |            |            |
|--------------|-------------------|------------|------------|
| Burkina Faso | iLiNS-Zinc (38)   | 315        | 96         |
| Burkina Faso | PROMIS CS (39)    |            |            |
| Ghana        | GHANA (40)        | 83         | 82         |
| Ghana        | iLiNS-DYADG (41)  |            |            |
| Kenya        | WASH-B (42)       | 298        | 259        |
| Madagascar   | MAHAY (43)        | 83         | 51         |
| Malawi       | iLiNS-DYADM (44)  |            |            |
| Malawi       | iLiNS-DOSE (45)   |            |            |
| Mali         | PROMIS CS (46)    |            |            |
| Zimbabwe     | SHINE (HIV-) (47) |            |            |
| Zimbabwe     | SHINE (HIV+) (48) |            |            |
|              |                   | <b>779</b> | <b>488</b> |

**I<sup>2</sup> = 0.63, Tau<sup>2</sup> = 0.04**

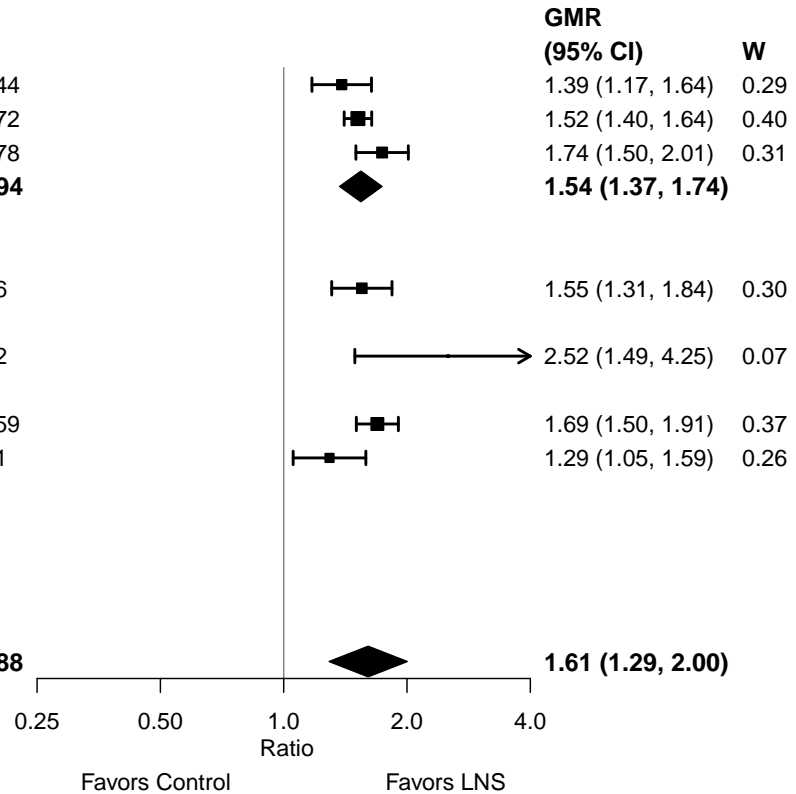

**Supplemental figure 4F: Geometric mean ratio of ferritin concentration**

**4F2: Stratified by Anemia burden (insufficient comparisons)**

**Supplemental figure 4F: Geometric mean ratio of ferritin concentration**

**4F3: Stratified by Malaria prevalence (insufficient comparisons)**

**Supplemental figure 4F: Geometric mean ratio of ferritin concentration**

**4F4: Stratified by Inflammation burden (insufficient comparisons)**

Supplemental figure 4F: Geometric mean ratio of ferritin concentration

4F5: Stratified by Source water quality

**Source water quality**

(p-diff = 0.862)

**Source water quality – Improved**

| Country                                             | Trial            | N           | N          | GMR (95% CI)             | W    |
|-----------------------------------------------------|------------------|-------------|------------|--------------------------|------|
| Bangladesh                                          | JiVitA-4 (35)    | 455         | 144        | 1.39 (1.17, 1.64)        | 0.30 |
| Bangladesh                                          | RDNS (36)        | 550         | 272        | 1.52 (1.40, 1.64)        | 0.45 |
| Bangladesh                                          | WASH-B (37)      | 94          | 58         | 1.75 (1.33, 2.31)        | 0.18 |
| Ghana                                               | GHANA (40)       | 83          | 82         | 2.52 (1.49, 4.25)        | 0.07 |
| Ghana                                               | iLiNS-DYADG (41) |             |            |                          |      |
| Malawi                                              | iLiNS-DYADM (44) |             |            |                          |      |
| Malawi                                              | iLiNS-DOSE (45)  |             |            |                          |      |
| <b>I<sup>2</sup> = 0.48, Tau<sup>2</sup> = 0.03</b> |                  | <b>1182</b> | <b>556</b> | <b>1.61 (1.32, 1.96)</b> |      |

**Source water quality – Unimproved**

|                                                     |                   |            |            |                          |      |
|-----------------------------------------------------|-------------------|------------|------------|--------------------------|------|
| Burkina Faso                                        | iLiNS-Zinc (38)   | 315        | 96         | 1.55 (1.31, 1.84)        | 0.34 |
| Burkina Faso                                        | PROMIS CS (39)    |            |            |                          |      |
| Kenya                                               | WASH-B (42)       | 166        | 144        | 1.67 (1.44, 1.94)        | 0.38 |
| Madagascar                                          | MAHAY (43)        | 83         | 51         | 1.29 (1.05, 1.59)        | 0.28 |
| Mali                                                | PROMIS CS (46)    |            |            |                          |      |
| Zimbabwe                                            | SHINE (HIV-) (47) |            |            |                          |      |
| Zimbabwe                                            | SHINE (HIV+) (48) |            |            |                          |      |
| <b>I<sup>2</sup> = 0.49, Tau<sup>2</sup> = 0.01</b> |                   | <b>564</b> | <b>291</b> | <b>1.52 (1.31, 1.75)</b> |      |

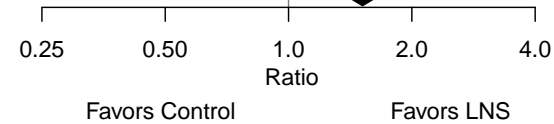

Supplemental figure 4F: Geometric mean ratio of ferritin concentration

4F6: Stratified by Sanitation

**Sanitation**  
(p-diff = 0.862)

**Sanitation – Improved**

| Country      | Trial            | N           | N          |
|--------------|------------------|-------------|------------|
| Bangladesh   | JiVitA-4 (35)    | 455         | 144        |
| Bangladesh   | RDNS (36)        | 550         | 272        |
| Bangladesh   | WASH-B (37)      | 94          | 58         |
| Burkina Faso | PROMIS CS (39)   |             |            |
| Ghana        | GHANA (40)       | 83          | 82         |
| Ghana        | iLiNS-DYADG (41) |             |            |
| Mali         | PROMIS CS (46)   |             |            |
|              |                  | <b>1182</b> | <b>556</b> |

**I<sup>2</sup> = 0.48, Tau<sup>2</sup> = 0.03**

**Sanitation – Unimproved**

|              |                   |            |            |
|--------------|-------------------|------------|------------|
| Burkina Faso | iLiNS-Zinc (38)   | 315        | 96         |
| Kenya        | WASH-B (42)       | 166        | 144        |
| Madagascar   | MAHAY (43)        | 83         | 51         |
| Malawi       | iLiNS-DYADM (44)  |            |            |
| Malawi       | iLiNS-DOSE (45)   |            |            |
| Zimbabwe     | SHINE (HIV-) (47) |            |            |
| Zimbabwe     | SHINE (HIV+) (48) |            |            |
|              |                   | <b>564</b> | <b>291</b> |

**I<sup>2</sup> = 0.49, Tau<sup>2</sup> = 0.01**

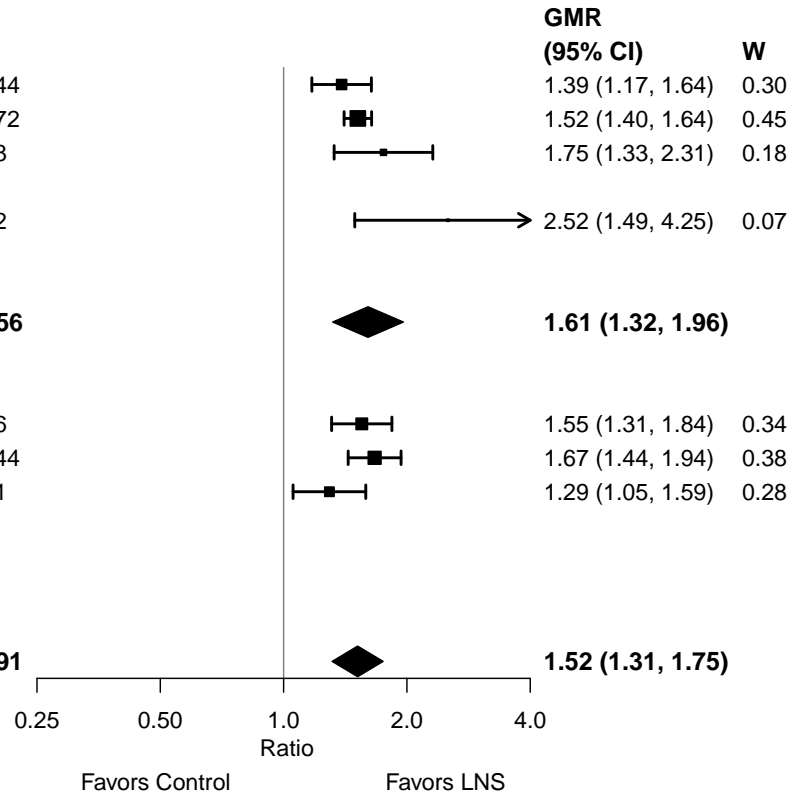

Supplemental figure 4F: Geometric mean ratio of ferritin concentration

4F7: Stratified by Supplement duration

**Supplement duration**

(p-diff = 0.153)

**Supplement duration – 12m or less**

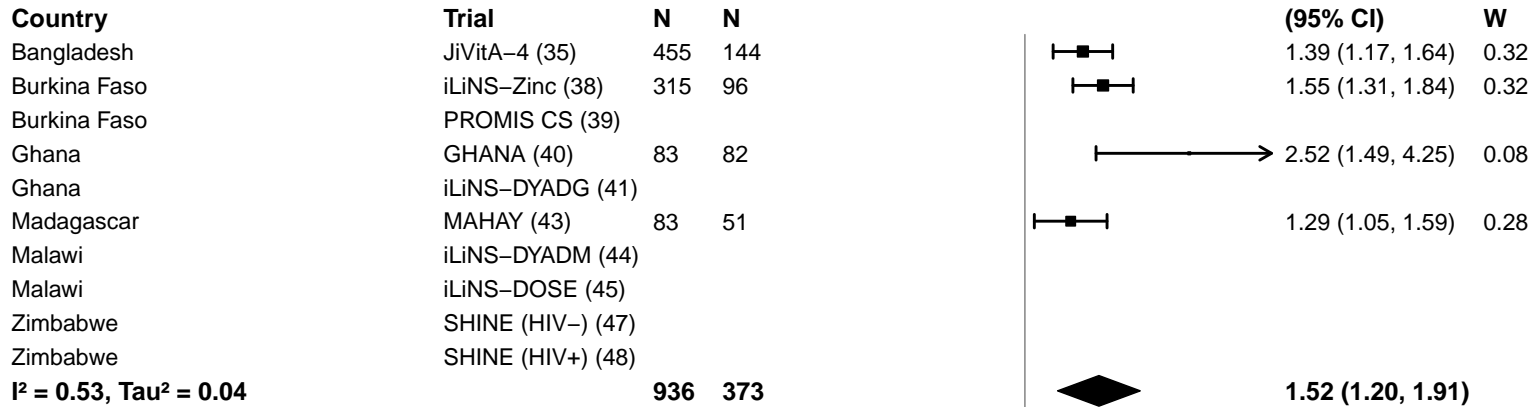

**Supplement duration – > 12m**

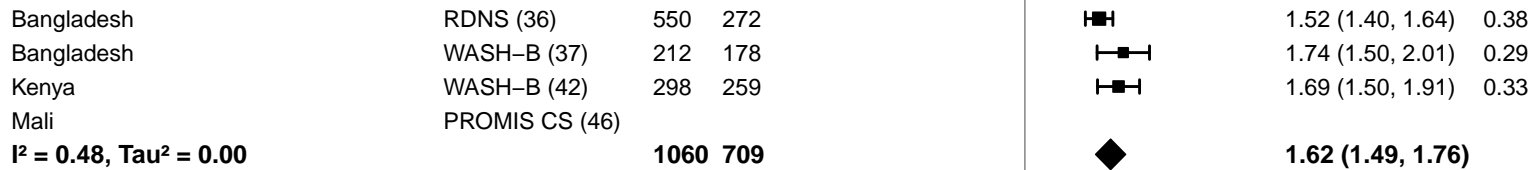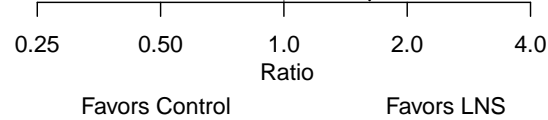



Supplemental figure 4F: Geometric mean ratio of ferritin concentration

4F8: Stratified by Iron dose

**Iron dose**  
(p-diff = 0.054)

**Iron dose – Less than 9 mg**

| Country      | Trial             | N          | N          | GMR (95% CI)             | W    |
|--------------|-------------------|------------|------------|--------------------------|------|
| Bangladesh   | JiVitA-4 (35)     | 455        | 144        | 1.39 (1.17, 1.64)        | 0.35 |
| Burkina Faso | iLiNS-Zinc (38)   | 315        | 96         | 1.55 (1.31, 1.84)        | 0.35 |
| Burkina Faso | PROMIS CS (39)    |            |            |                          |      |
| Ghana        | iLiNS-DYADG (41)  |            |            |                          |      |
| Madagascar   | MAHAY (43)        | 83         | 51         | 1.29 (1.05, 1.59)        | 0.30 |
| Malawi       | iLiNS-DYADM (44)  |            |            |                          |      |
| Malawi       | iLiNS-DOSE (45)   |            |            |                          |      |
| Mali         | PROMIS CS (46)    |            |            |                          |      |
| Zimbabwe     | SHINE (HIV-) (47) |            |            |                          |      |
| Zimbabwe     | SHINE (HIV+) (48) |            |            |                          |      |
|              |                   | <b>853</b> | <b>291</b> | <b>1.42 (1.28, 1.57)</b> |      |

**I<sup>2</sup> = 0.00, Tau<sup>2</sup> = 0.00**

**Iron dose – 9 mg**

|            |             |             |            |                          |      |
|------------|-------------|-------------|------------|--------------------------|------|
| Bangladesh | RDNS (36)   | 550         | 272        | 1.52 (1.40, 1.64)        | 0.35 |
| Bangladesh | WASH-B (37) | 212         | 178        | 1.74 (1.50, 2.01)        | 0.28 |
| Ghana      | GHANA (40)  | 83          | 82         | 2.52 (1.49, 4.25)        | 0.06 |
| Kenya      | WASH-B (42) | 298         | 259        | 1.69 (1.50, 1.91)        | 0.31 |
|            |             | <b>1143</b> | <b>791</b> | <b>1.67 (1.47, 1.90)</b> |      |

**I<sup>2</sup> = 0.56, Tau<sup>2</sup> = 0.01**

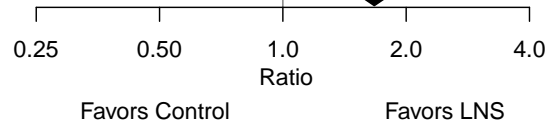

Supplemental figure 4F: Geometric mean ratio of ferritin concentration

4F9: Stratified by Frequency of contact

**Frequency of contact**

(p-diff = 0.584)

**Frequency of contact – Monthly**

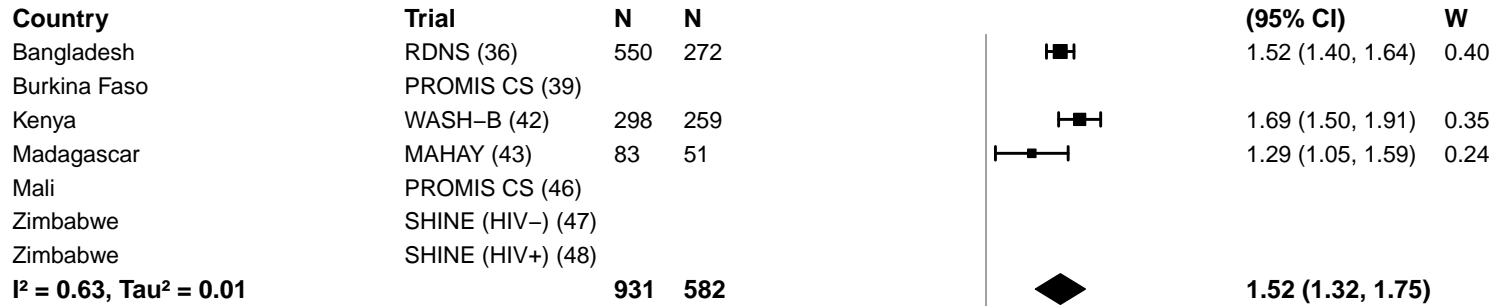

**Frequency of contact – Weekly**

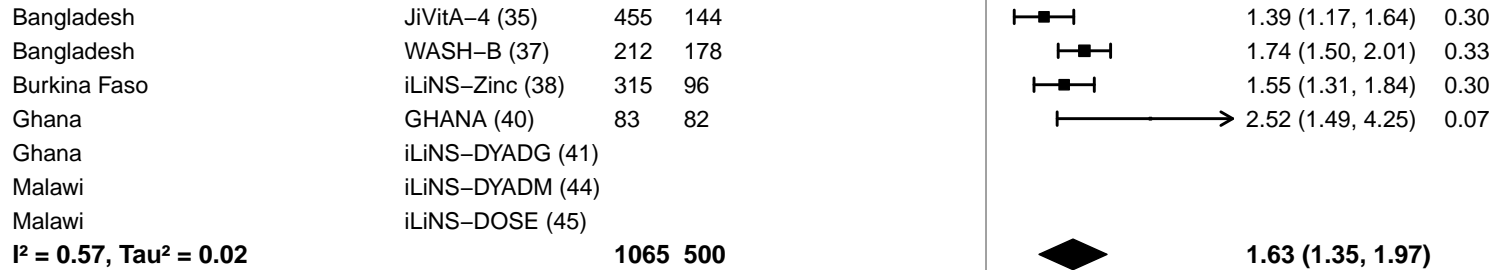

0.25 0.50 1.0 2.0 4.0  
Ratio  
Favors Control Favors LNS

**Supplemental figure 4F: Geometric mean ratio of ferritin concentration**

**4F10: Stratified by Average SQ-LNS compliance (insufficient comparisons)**

## Supplemental figure 4G: Iron deficiency (ferritin < 12 µg/L) prevalence ratio

### 4G1: Stratified by Geographic region

#### Geographic region

(p-diff = 0.016)

#### Geographic region – SEAR

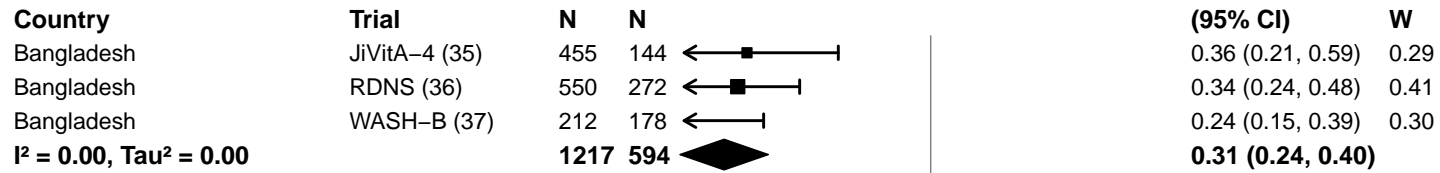

#### Geographic region – AFR

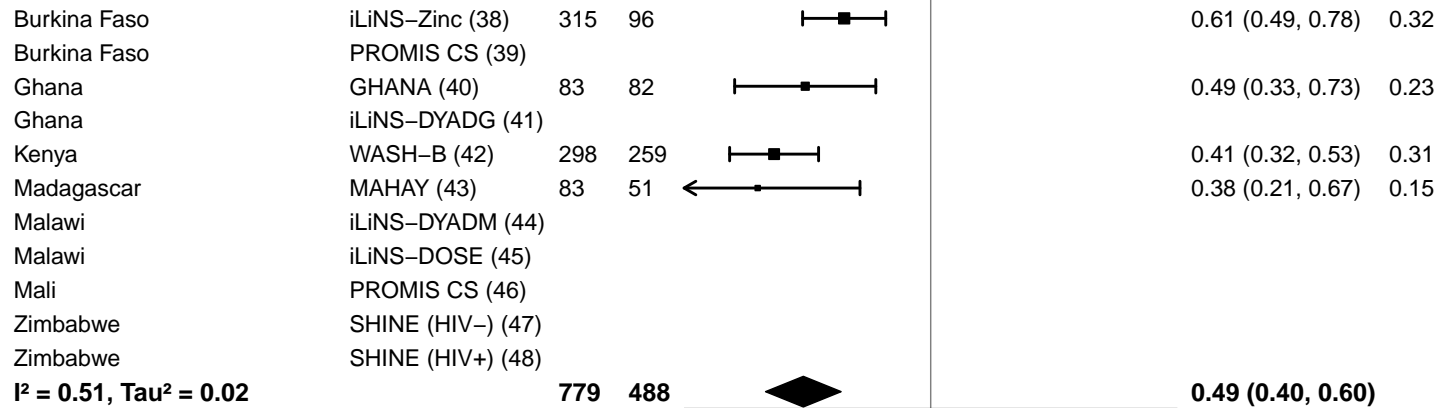

0.25 0.50 1.0 2.0 4.0  
Ratio  
Favors LNS Favors Control

**Supplemental figure 4G: Iron deficiency (ferritin < 12 µg/L) prevalence ratio**

**4G2: Stratified by Anemia burden (insufficient comparisons)**

**Supplemental figure 4G: Iron deficiency (ferritin < 12 µg/L) prevalence ratio**

**4G3: Stratified by Malaria prevalence (insufficient comparisons)**

**Supplemental figure 4G: Iron deficiency (ferritin < 12 µg/L) prevalence ratio**

**4G4: Stratified by Inflammation burden (insufficient comparisons)**

Supplemental figure 4G: Iron deficiency (ferritin < 12 µg/L) prevalence ratio

4G5: Stratified by Source water quality

**Source water quality**

(p-diff = 0.105)

**Source water quality – Improved**

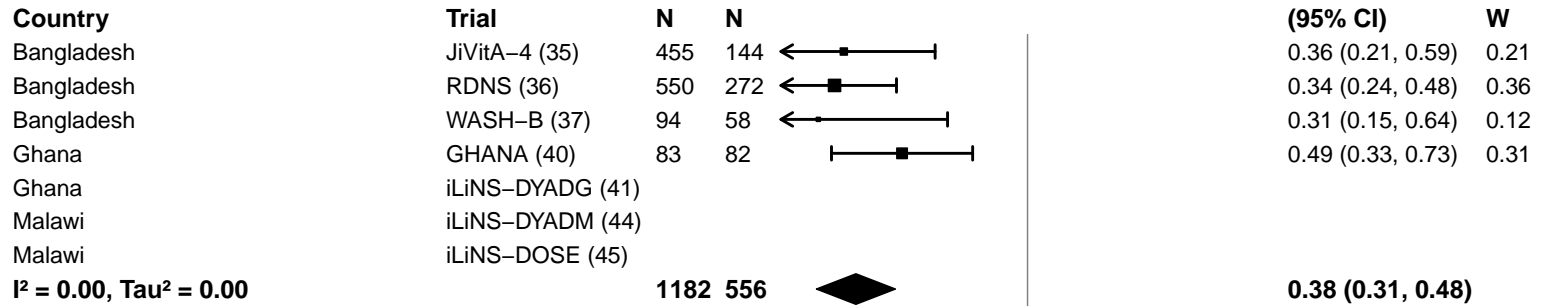

**Source water quality – Unimproved**

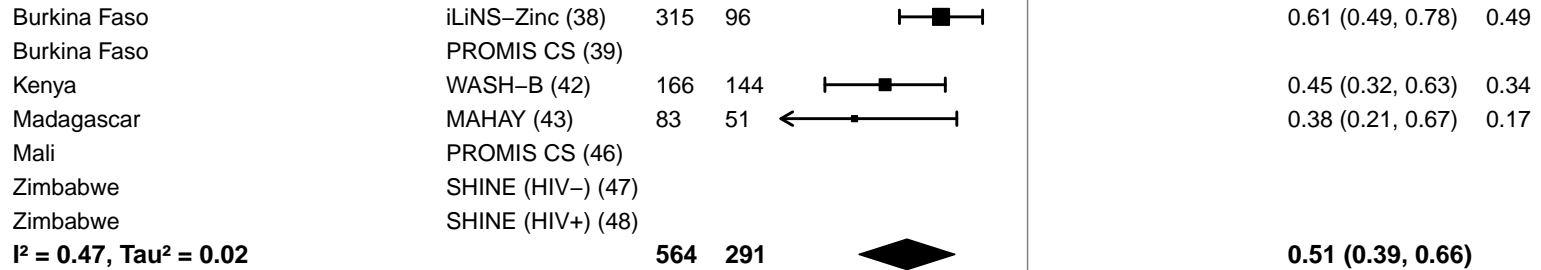

0.25 0.50 1.0 2.0 4.0  
Ratio  
Favors LNS Favors Control



Supplemental figure 4G: Iron deficiency (ferritin < 12 µg/L) prevalence ratio

4G6: Stratified by Sanitation

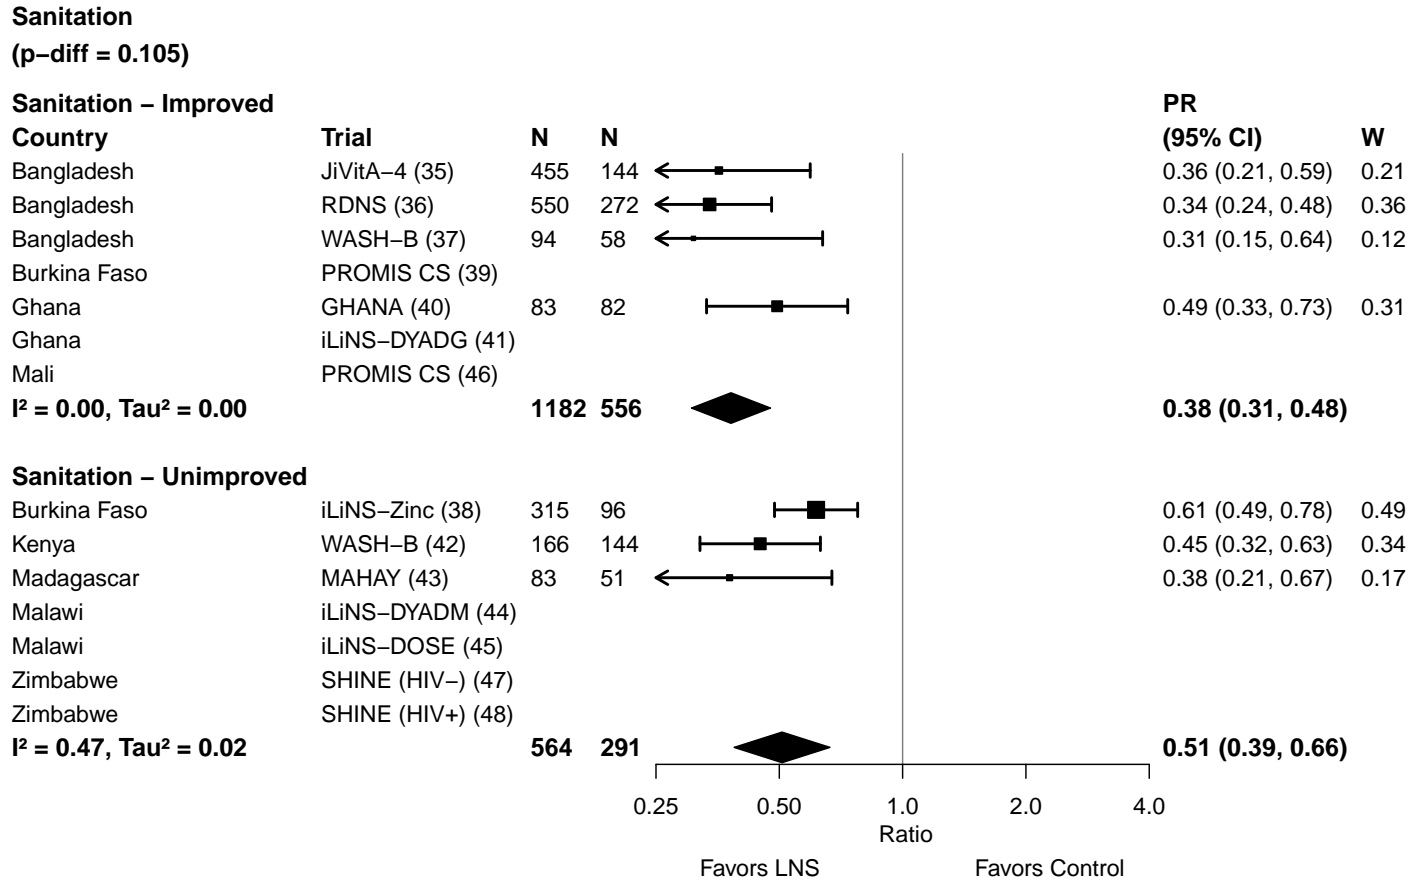

Supplemental figure 4G: Iron deficiency (ferritin < 12 µg/L) prevalence ratio

4G7: Stratified by Supplement duration

**Supplement duration**

(p-diff = 0.081)

**Supplement duration – 12m or less**

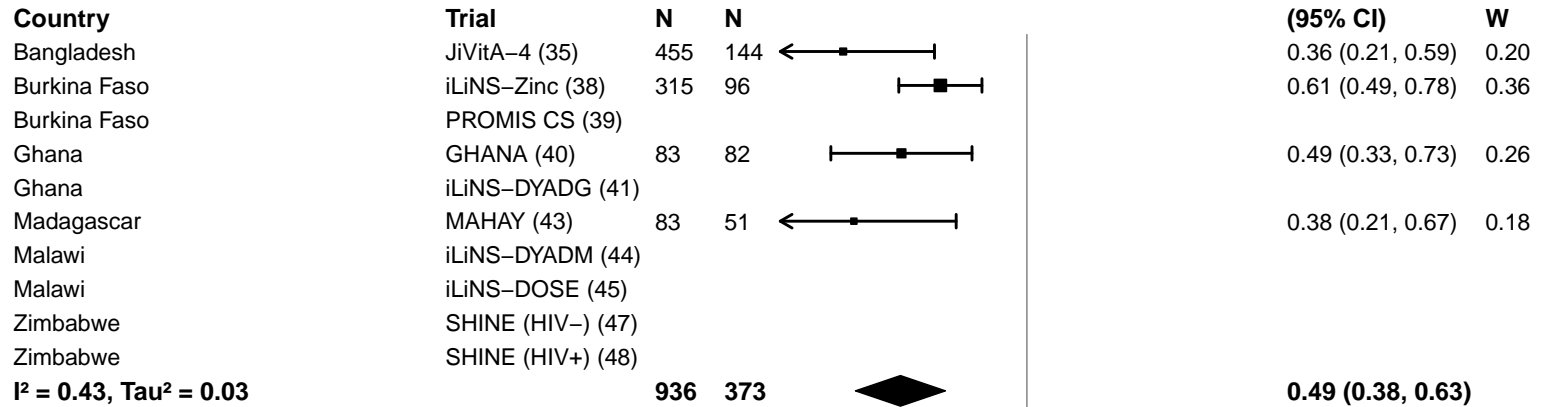

**Supplement duration – > 12m**

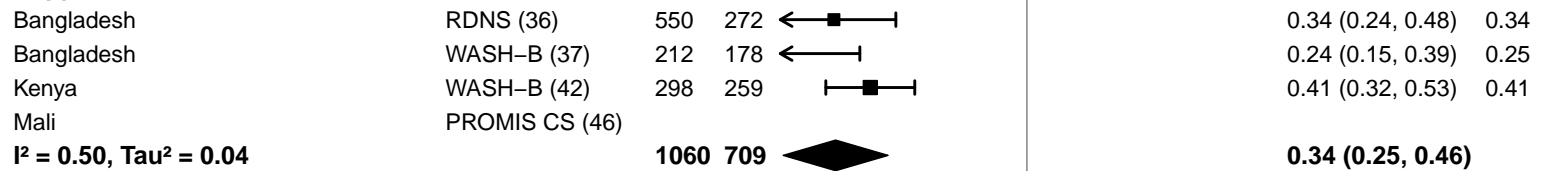

Supplemental figure 4G: Iron deficiency (ferritin < 12 µg/L) prevalence ratio

4G8: Stratified by Iron dose

**Iron dose**  
(p-diff = 0.278)

**Iron dose – Less than 9 mg**

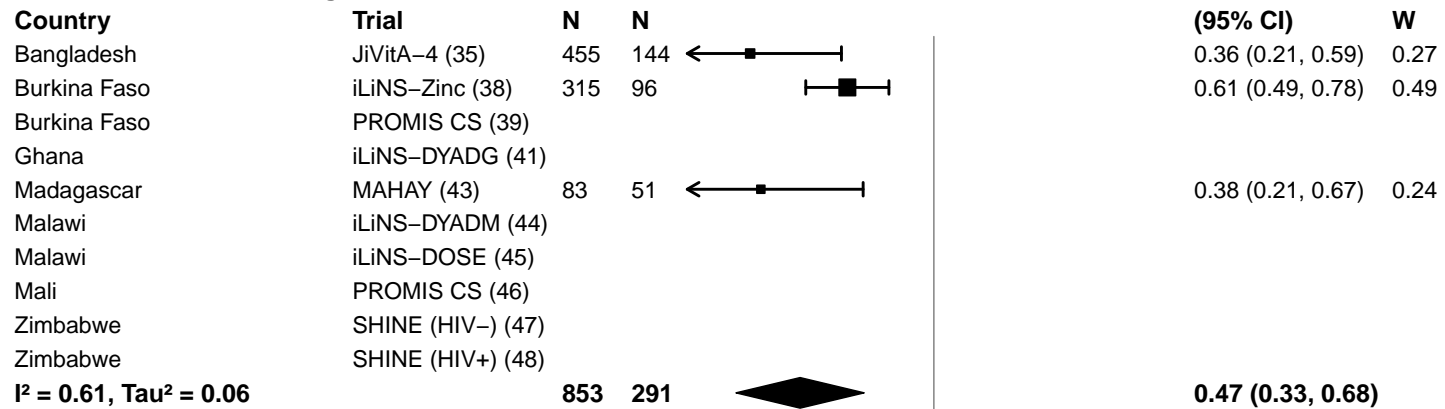

**Iron dose – 9 mg**

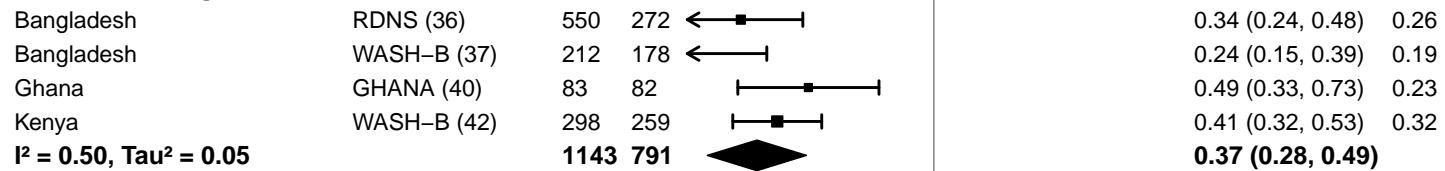

0.25 0.50 1.0 2.0 4.0  
Ratio  
Favors LNS Favours Control

Supplemental figure 4G: Iron deficiency (ferritin < 12 µg/L) prevalence ratio

4G9: Stratified by Frequency of contact

**Frequency of contact**

(p-diff = 0.624)

**Frequency of contact – Monthly**

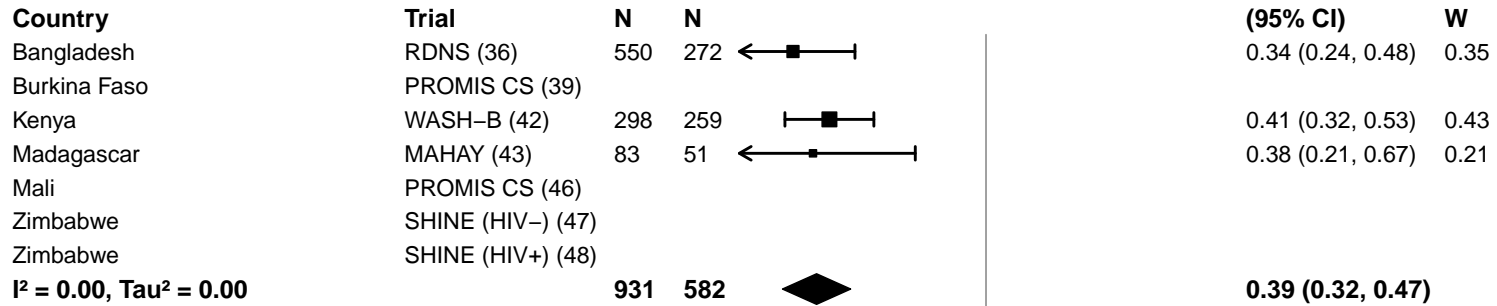

**Frequency of contact – Weekly**

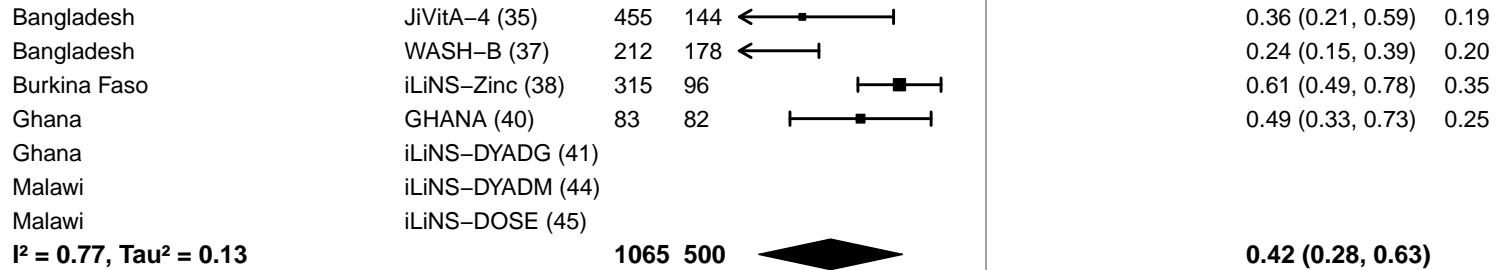

0.25 0.50 1.0 2.0 4.0  
Ratio  
Favors LNS Favours Control

**Supplemental figure 4G: Iron deficiency (ferritin < 12 µg/L) prevalence ratio**

**4G10: Stratified by Average SQ-LNS compliance (insufficient comparisons)**

## Supplemental figure 4H: Iron deficiency (ferritin < 12 µg/L) prevalence difference

### 4H1: Stratified by Geographic region

#### Geographic region

(p-diff = 0.026)

#### Geographic region – SEAR

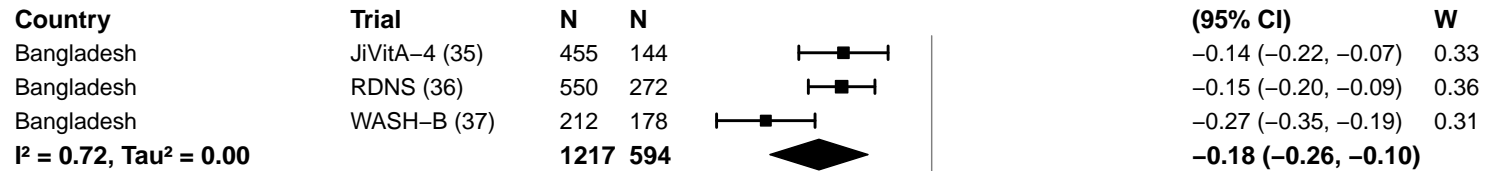

#### Geographic region – AFR

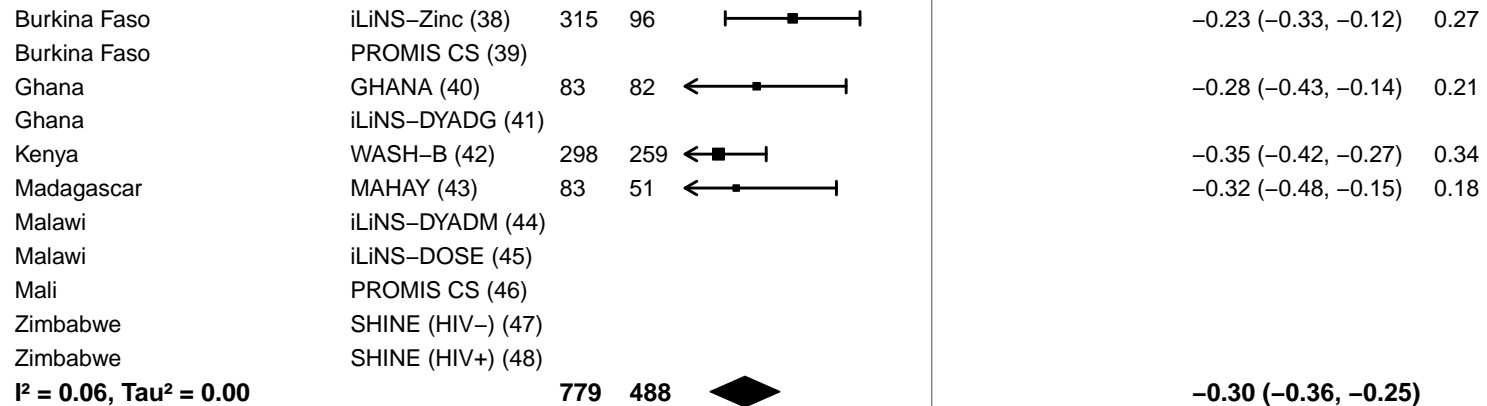

-0.4 -0.2 0 0.2 0.4  
Difference  
Favors LNS Favors Control

**Supplemental figure 4H: Iron deficiency (ferritin < 12 µg/L) prevalence difference**

**4H2: Stratified by Anemia burden (insufficient comparisons)**

**Supplemental figure 4H: Iron deficiency (ferritin < 12 µg/L) prevalence difference**

**4H3: Stratified by Malaria prevalence (insufficient comparisons)**



**Supplemental figure 4H: Iron deficiency (ferritin < 12 µg/L) prevalence difference**

**4H4: Stratified by Inflammation burden (insufficient comparisons)**

Supplemental figure 4H: Iron deficiency (ferritin < 12 µg/L) prevalence difference

4H5: Stratified by Source water quality

**Source water quality**

(p-diff = 0.006)

**Source water quality – Improved**

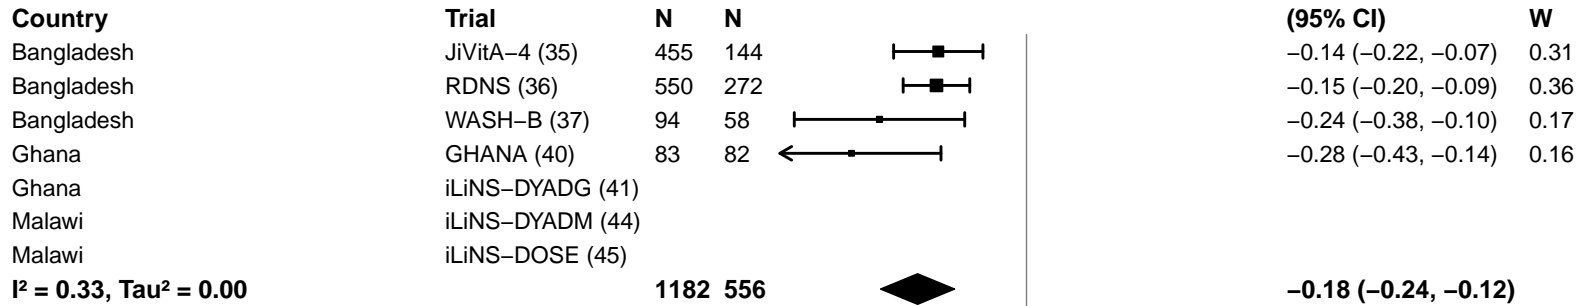

**Source water quality – Unimproved**

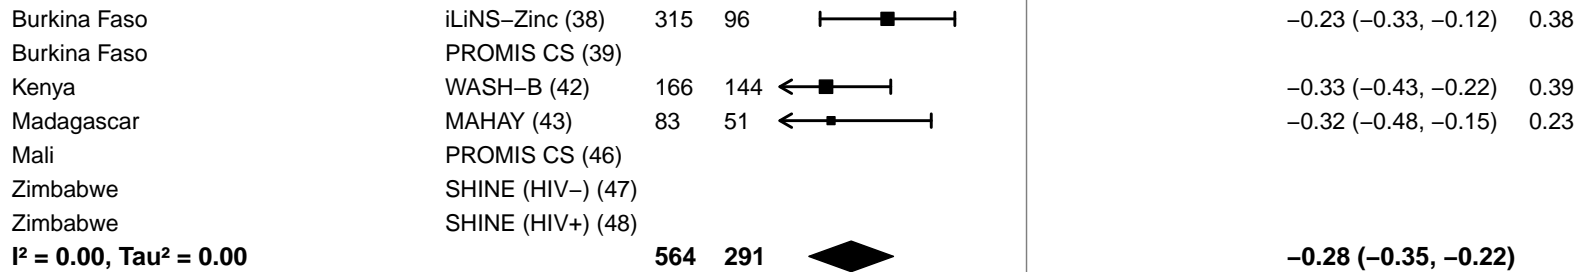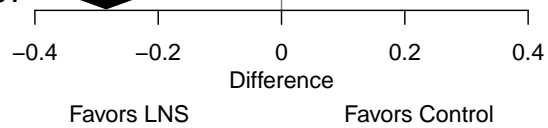

Supplemental figure 4H: Iron deficiency (ferritin < 12 µg/L) prevalence difference

4H6: Stratified by Sanitation

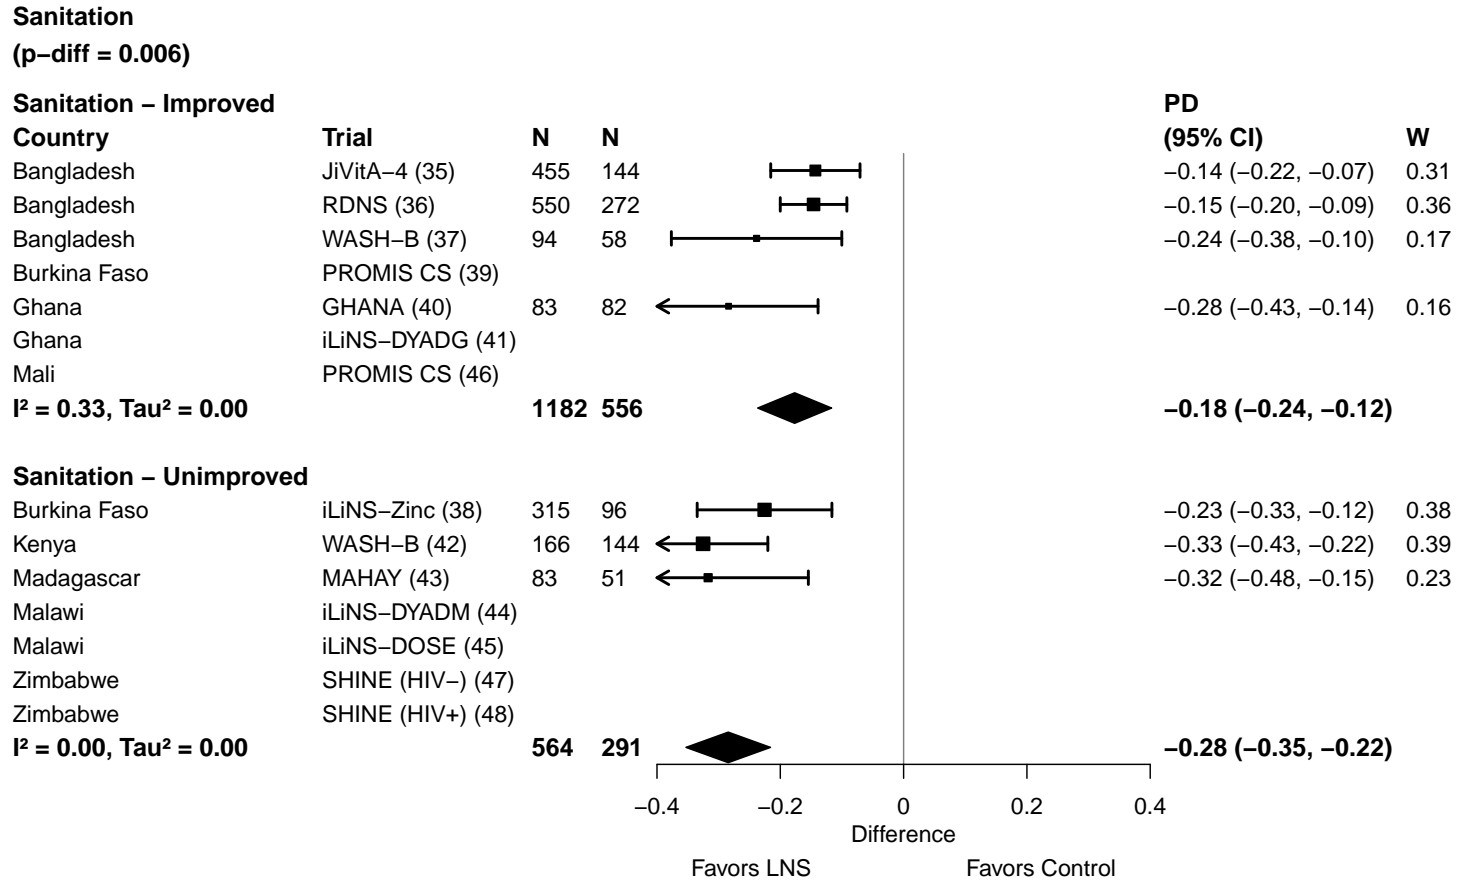

Supplemental figure 4H: Iron deficiency (ferritin < 12 µg/L) prevalence difference

4H7: Stratified by Supplement duration

**Supplement duration**

(p-diff = 0.767)

**Supplement duration – 12m or less**

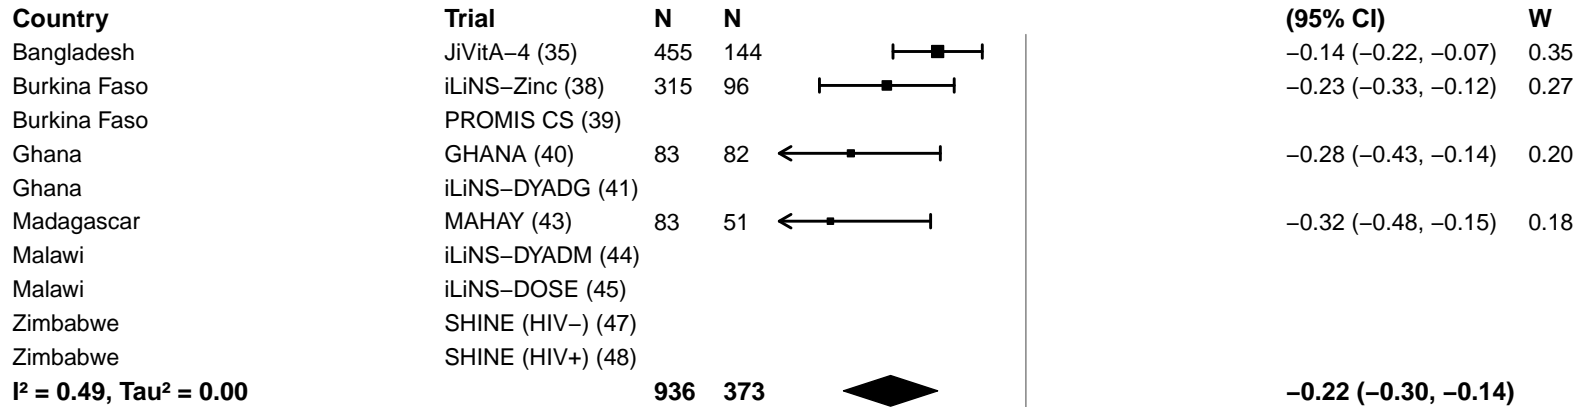

**Supplement duration – > 12m**

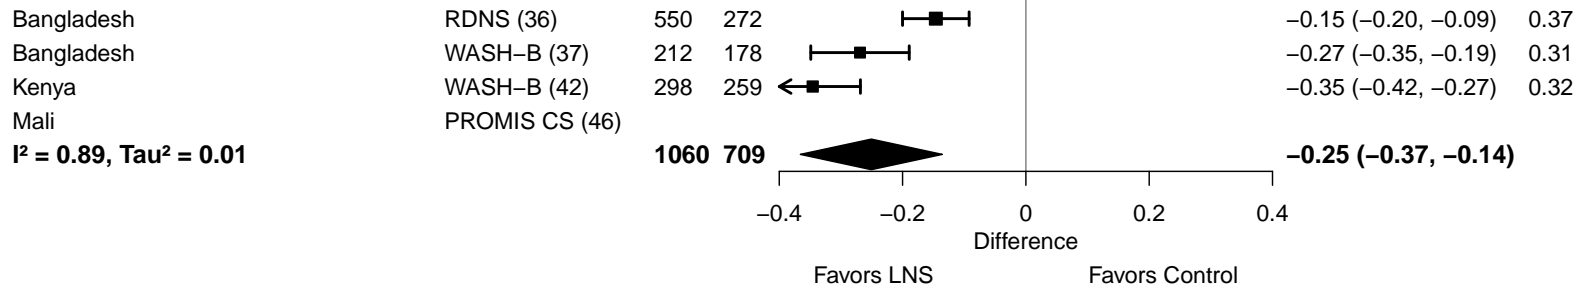

Supplemental figure 4H: Iron deficiency (ferritin < 12 µg/L) prevalence difference

4H8: Stratified by Iron dose

**Iron dose**  
(p-diff = 0.548)

**Iron dose – Less than 9 mg**

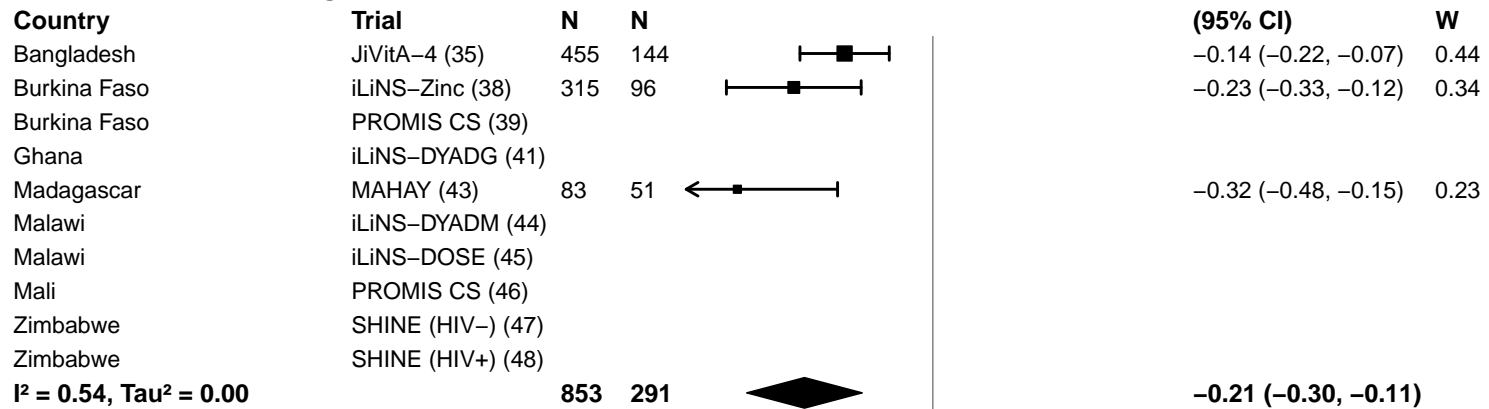

**Iron dose – 9 mg**

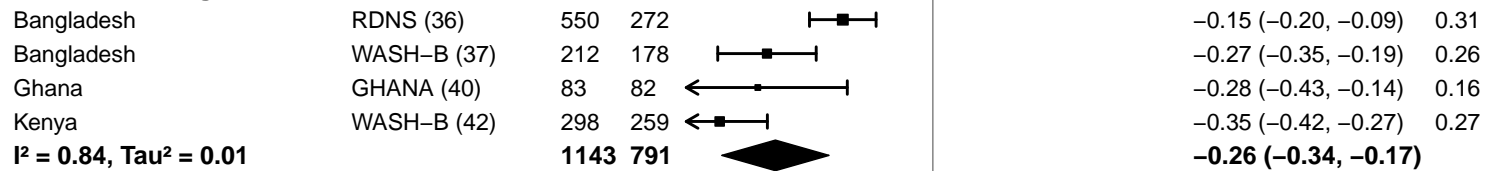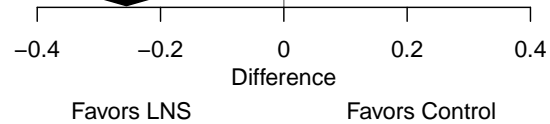

Supplemental figure 4H: Iron deficiency (ferritin < 12 µg/L) prevalence difference

4H9: Stratified by Frequency of contact

**Frequency of contact**

(p-diff = 0.650)

**Frequency of contact – Monthly**

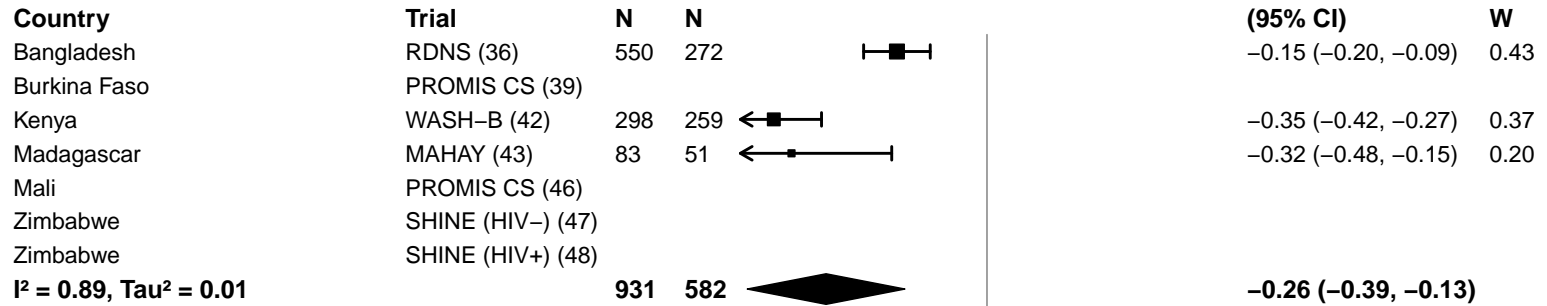

**Frequency of contact – Weekly**

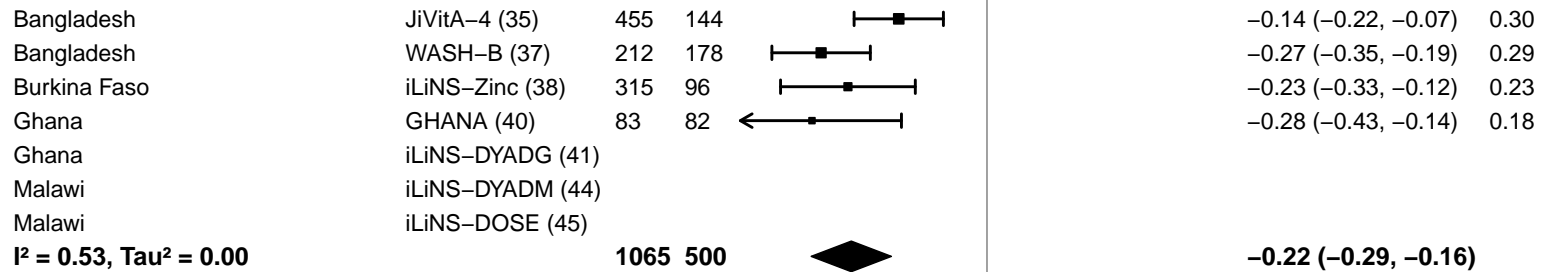

-0.4 -0.2 0 0.2 0.4  
Difference  
Favors LNS Favors Control

**Supplemental figure 4H: Iron deficiency (ferritin < 12 µg/L) prevalence difference**

**4H10: Stratified by Average SQ-LNS compliance (insufficient comparisons)**

## Supplemental figure 4I: Iron deficiency anemia prevalence ratio

4I1: Stratified by Geographic region (insufficient comparisons)



**Supplemental figure 4I: Iron deficiency anemia prevalence ratio**

**4I2: Stratified by Anemia burden (insufficient comparisons)**

**Supplemental figure 4I: Iron deficiency anemia prevalence ratio**

**4I3: Stratified by Malaria prevalence (insufficient comparisons)**

**Supplemental figure 4I: Iron deficiency anemia prevalence ratio**

**4I4: Stratified by Inflammation burden (insufficient comparisons)**

Supplemental figure 4I: Iron deficiency anemia prevalence ratio

4I5: Stratified by Source water quality

**Source water quality**

(p-diff = 0.012)

**Source water quality – Improved**

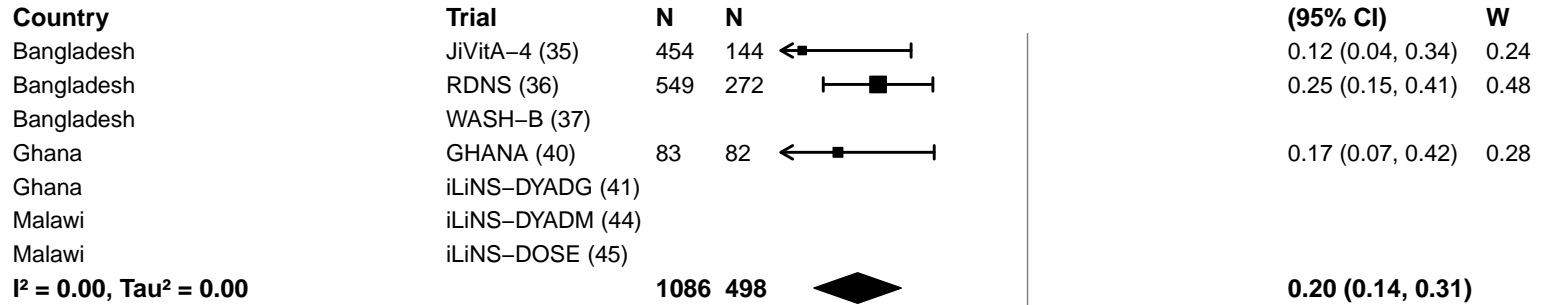

**Source water quality – Unimproved**

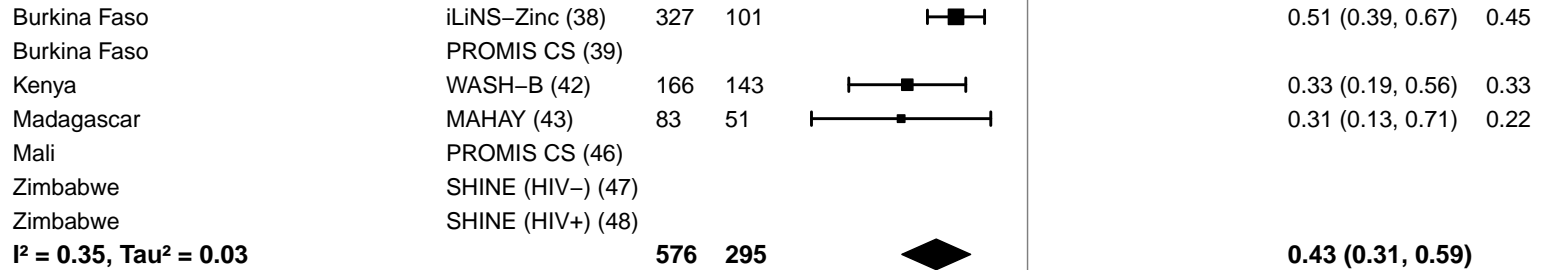

Supplemental figure 4I: Iron deficiency anemia prevalence ratio

4I6: Stratified by Sanitation

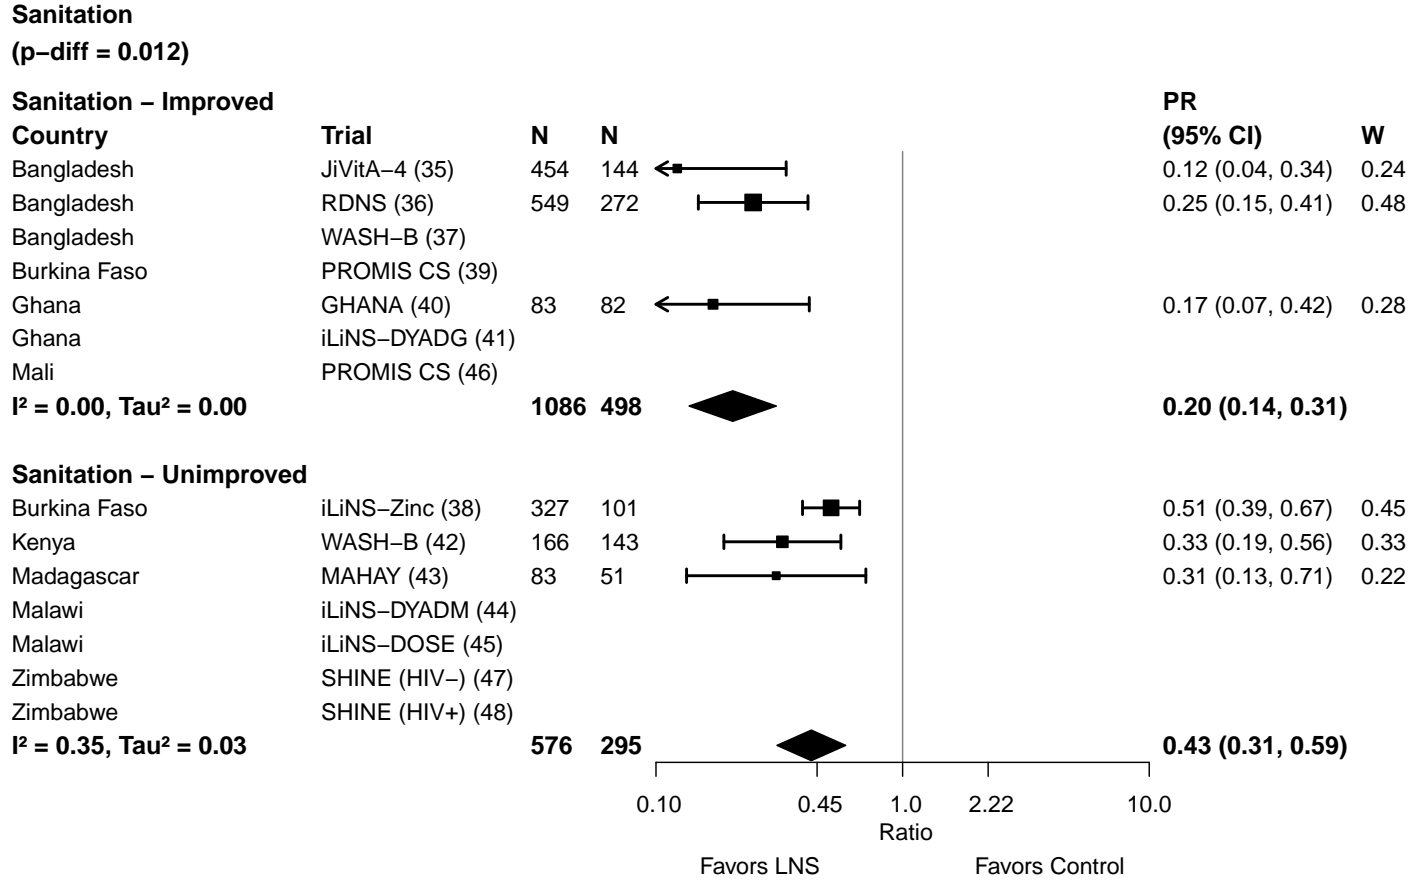

**Supplemental figure 4I: Iron deficiency anemia prevalence ratio**

**4I7: Stratified by Supplement duration (insufficient comparisons)**

Supplemental figure 4I: Iron deficiency anemia prevalence ratio

4I8: Stratified by Iron dose

**Iron dose**  
(p-diff = 0.402)

**Iron dose – Less than 9 mg**

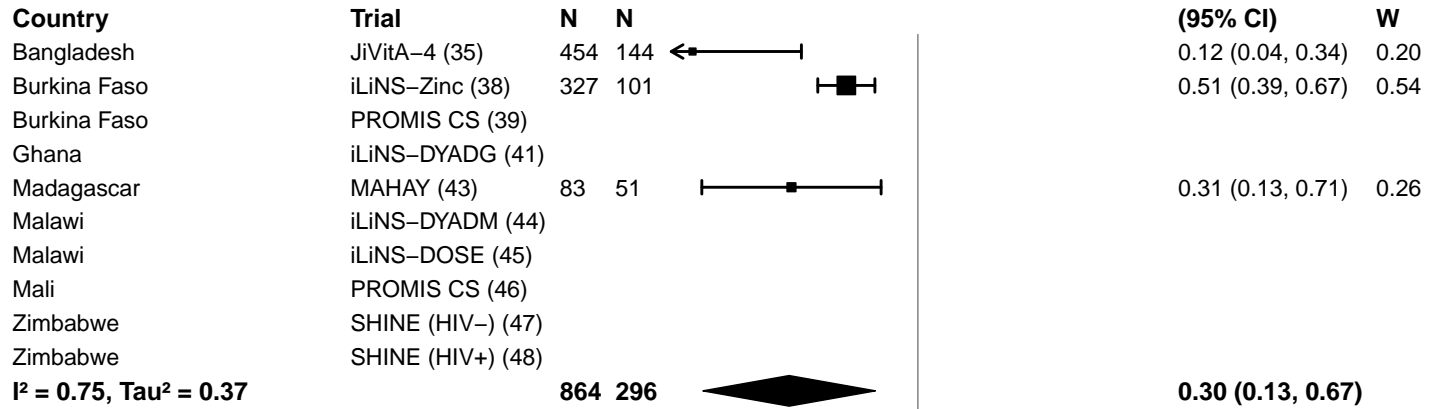

**Iron dose – 9 mg**

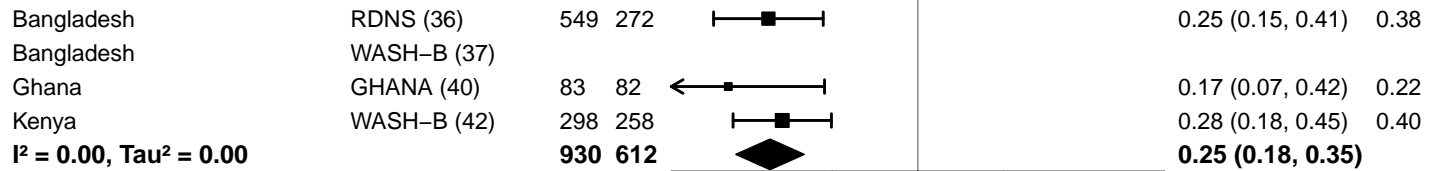

Supplemental figure 4I: Iron deficiency anemia prevalence ratio

4I9: Stratified by Frequency of contact

**Frequency of contact**

(p-diff = 0.981)

**Frequency of contact – Monthly**

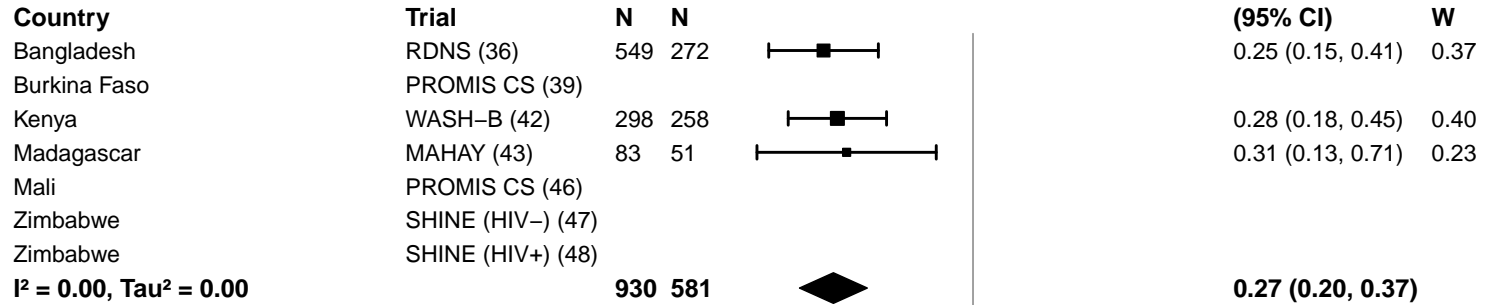

**Frequency of contact – Weekly**

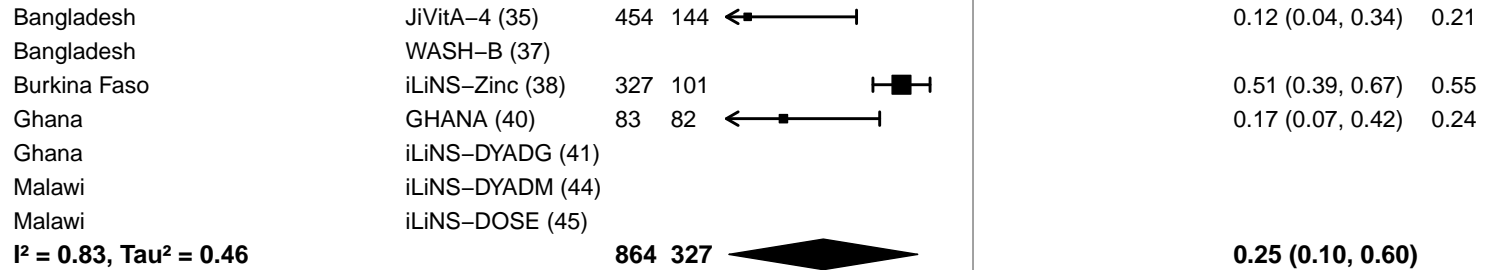

0.10 0.45 1.0 2.22 10.0  
Ratio  
Favors LNS Favors Control



**Supplemental figure 4I: Iron deficiency anemia prevalence ratio**

**4I10: Stratified by Average SQ-LNS compliance (insufficient comparisons)**

## Supplemental figure 4J: Iron deficiency anemia prevalence difference

4J1: Stratified by Geographic region (insufficient comparisons)

**Supplemental figure 4J: Iron deficiency anemia prevalence difference**

**4J2: Stratified by Anemia burden (insufficient comparisons)**

**Supplemental figure 4J: Iron deficiency anemia prevalence difference**

**4J3: Stratified by Malaria prevalence (insufficient comparisons)**

**Supplemental figure 4J: Iron deficiency anemia prevalence difference**

**4J4: Stratified by Inflammation burden (insufficient comparisons)**

Supplemental figure 4J: Iron deficiency anemia prevalence difference

4J5: Stratified by Source water quality

**Source water quality**

(p-diff = 0.222)

**Source water quality – Improved**

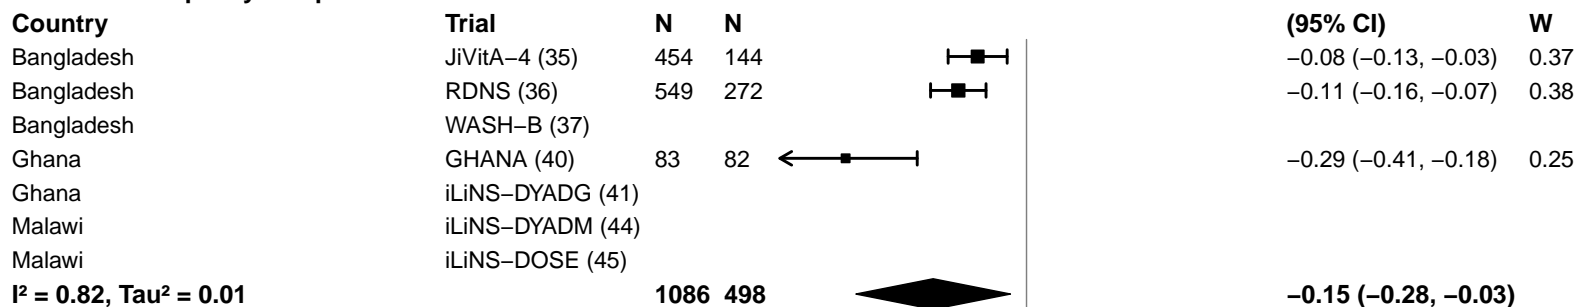

**Source water quality – Unimproved**

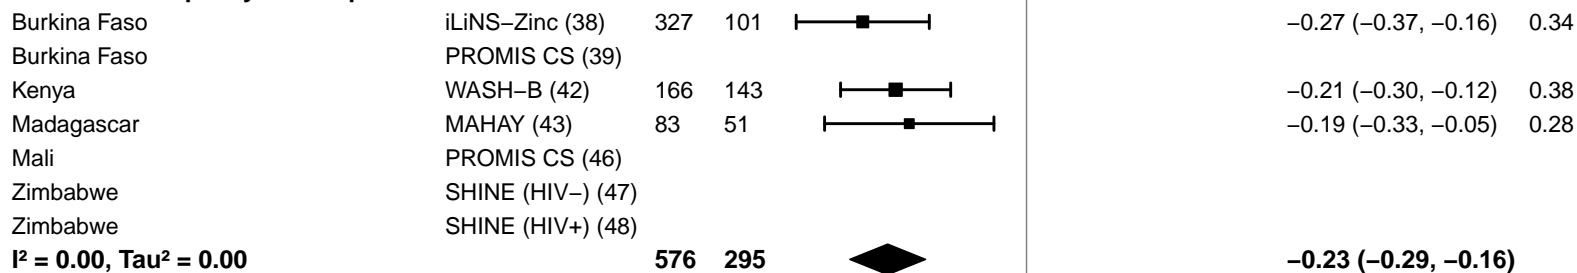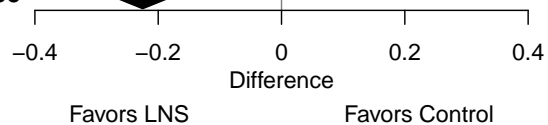

Supplemental figure 4J: Iron deficiency anemia prevalence difference

4J6: Stratified by Sanitation

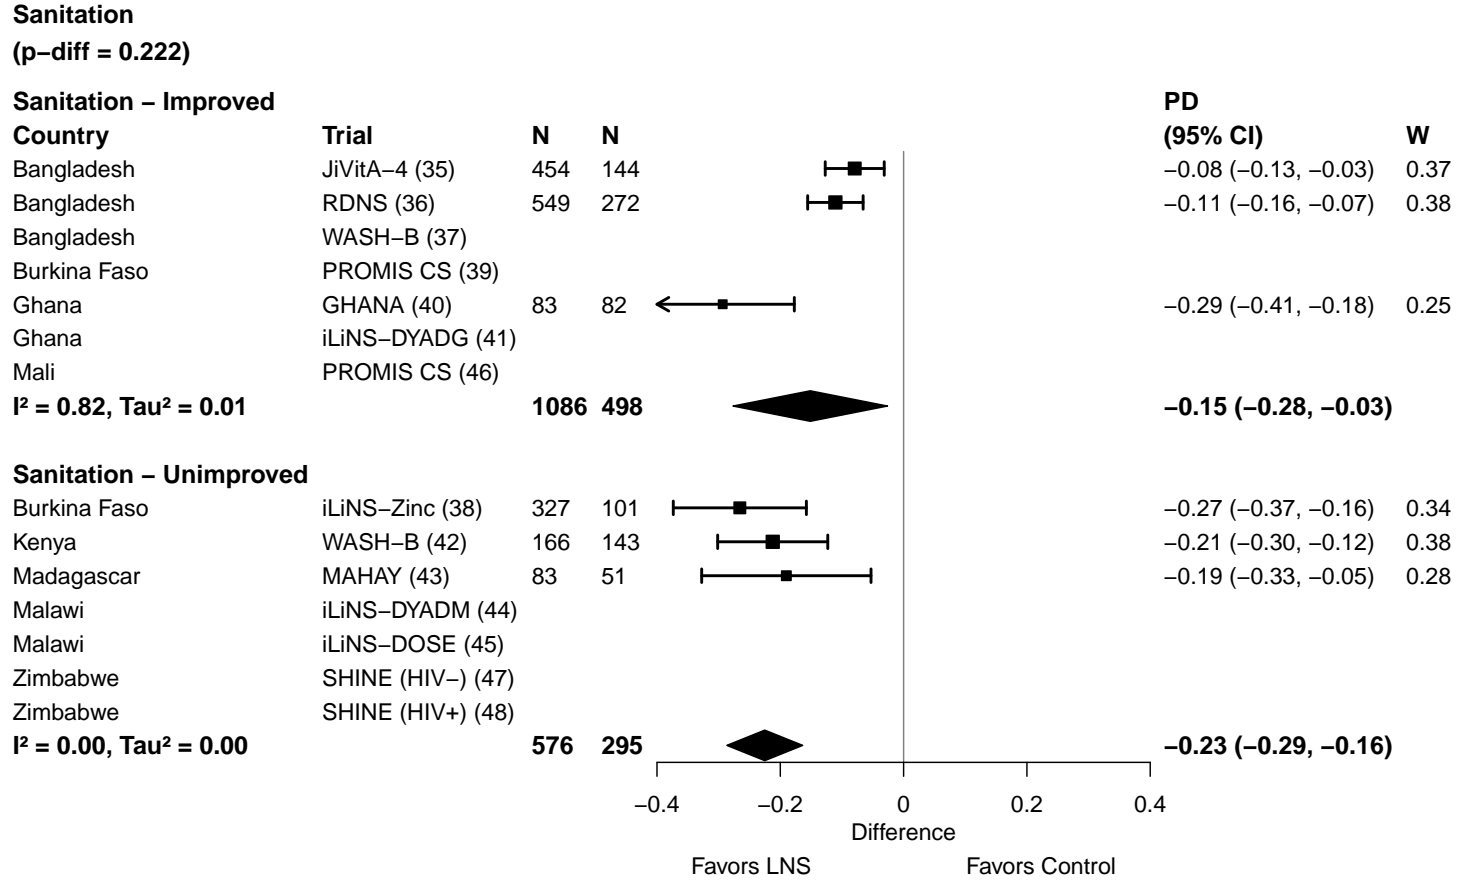

**Supplemental figure 4J: Iron deficiency anemia prevalence difference**

**4J7: Stratified by Supplement duration (insufficient comparisons)**



Supplemental figure 4J: Iron deficiency anemia prevalence difference

4J8: Stratified by Iron dose

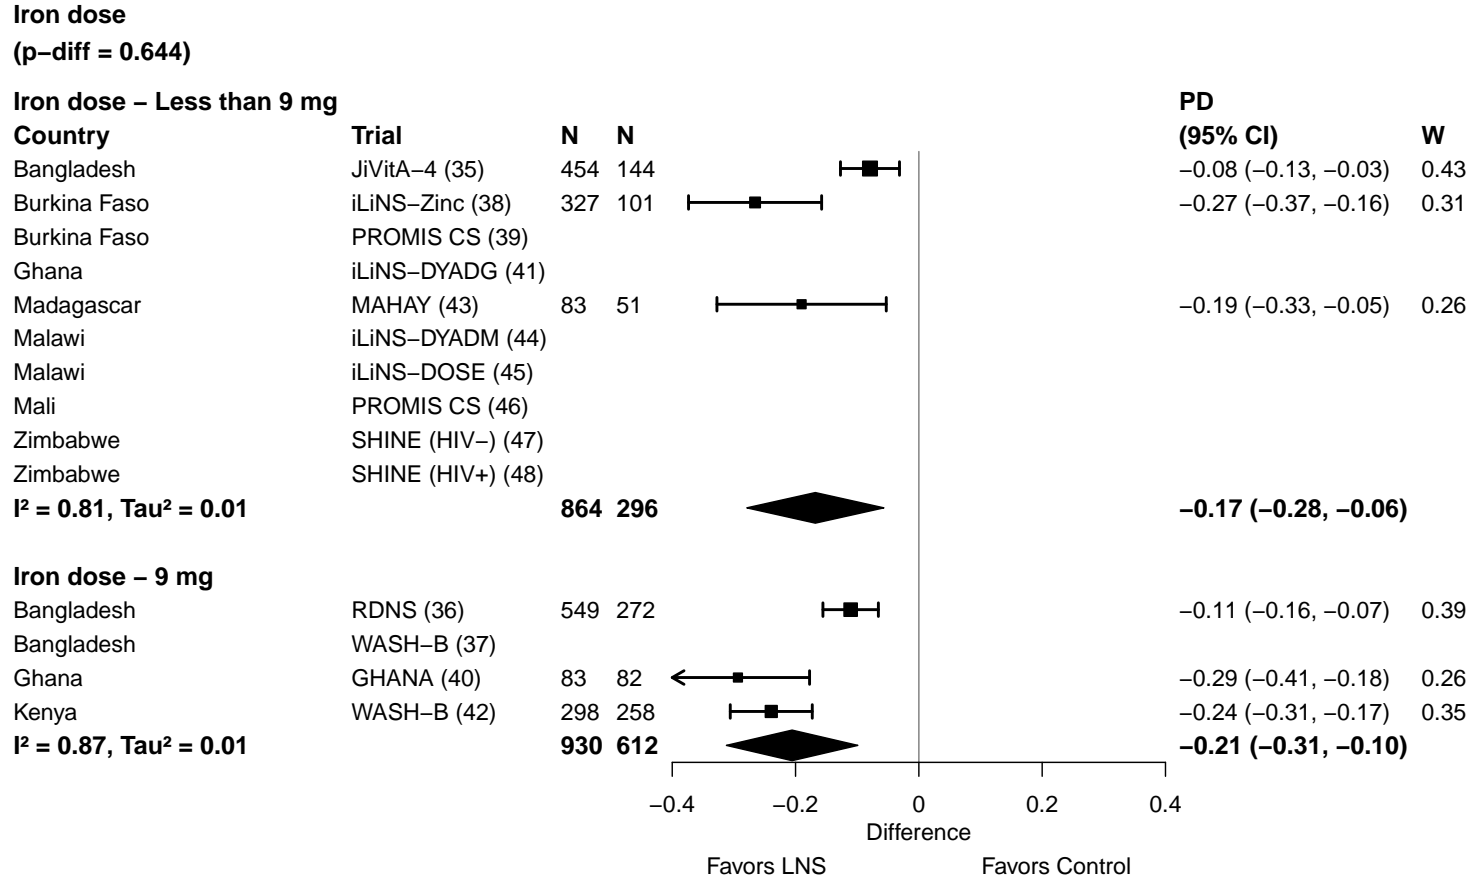

Supplemental figure 4J: Iron deficiency anemia prevalence difference

4J9: Stratified by Frequency of contact

**Frequency of contact**

( $p$ -diff = 0.780)

**Frequency of contact – Monthly**

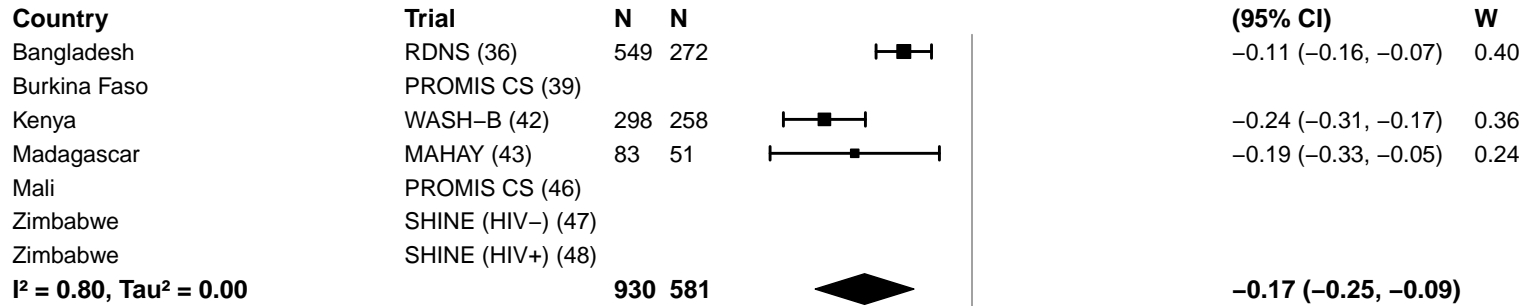

**Frequency of contact – Weekly**

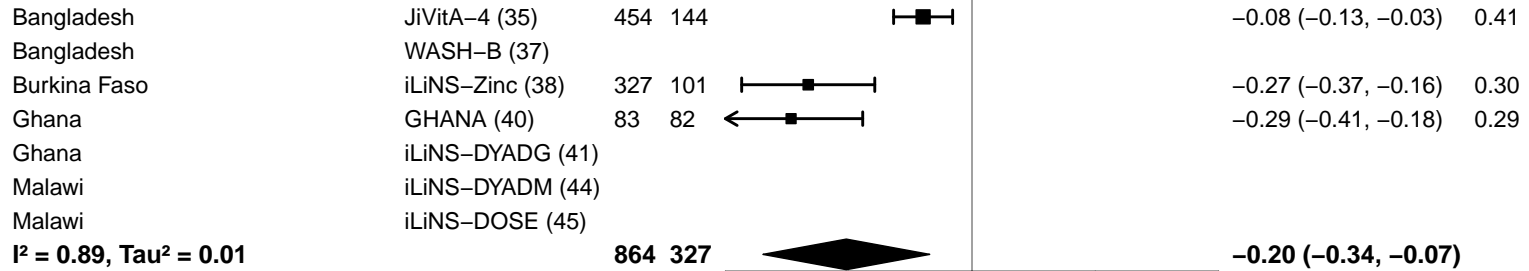

-0.4 -0.2 0 0.2 0.4  
Difference  
Favors LNS Favors Control

**Supplemental figure 4J: Iron deficiency anemia prevalence difference**

**4J10: Stratified by Average SQ-LNS compliance (insufficient comparisons)**

**Supplemental figure 4K: Geometric mean ratio of soluble transferrin receptor concentration**  
**4K1: Stratified by Geographic region (insufficient comparisons)**

**Supplemental figure 4K: Geometric mean ratio of soluble transferrin receptor concentration**

**4K2: Stratified by Anemia burden (insufficient comparisons)**

**Supplemental figure 4K: Geometric mean ratio of soluble transferrin receptor concentration**

**4K3: Stratified by Malaria prevalence (insufficient comparisons)**

**Supplemental figure 4K: Geometric mean ratio of soluble transferrin receptor concentration**

**4K4: Stratified by Inflammation burden (insufficient comparisons)**

Supplemental figure 4K: Geometric mean ratio of soluble transferrin receptor concentration

4K5: Stratified by Source water quality

**Source water quality**

(p-diff = 0.779)

**Source water quality – Improved**

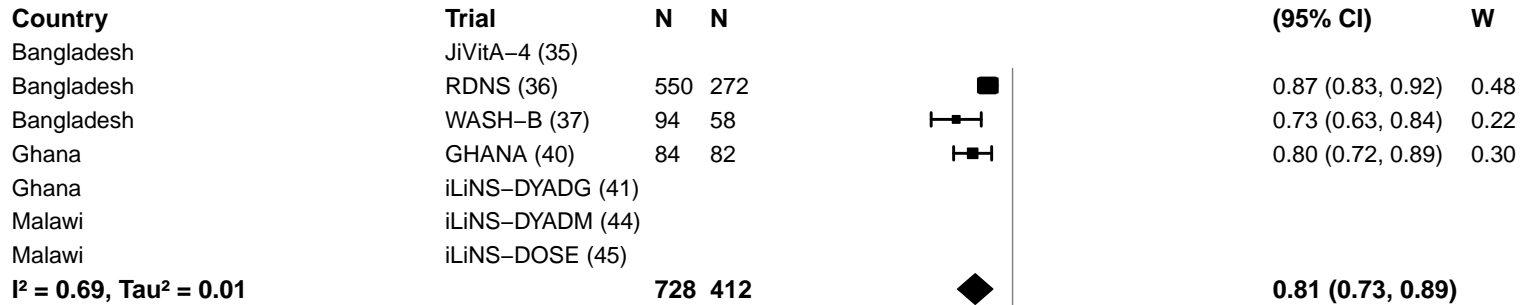

**Source water quality – Unimproved**

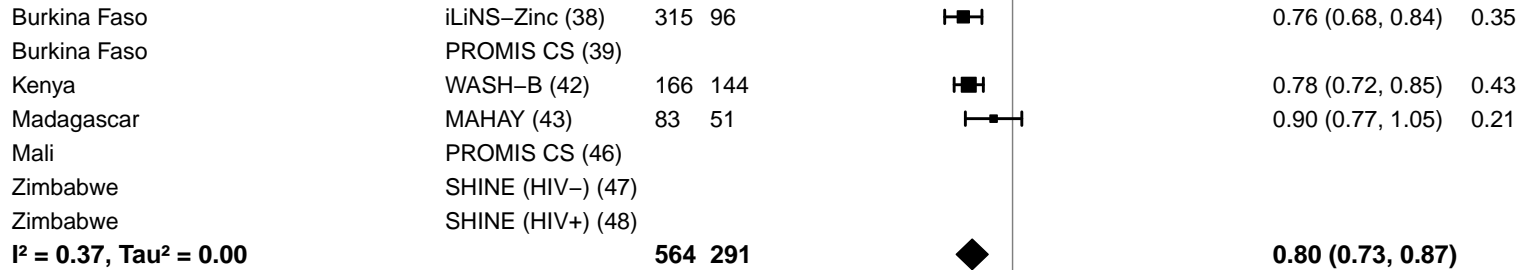



Supplemental figure 4K: Geometric mean ratio of soluble transferrin receptor concentration

4K6: Stratified by Sanitation

**Sanitation**  
(p-diff = 0.779)

**Sanitation – Improved**

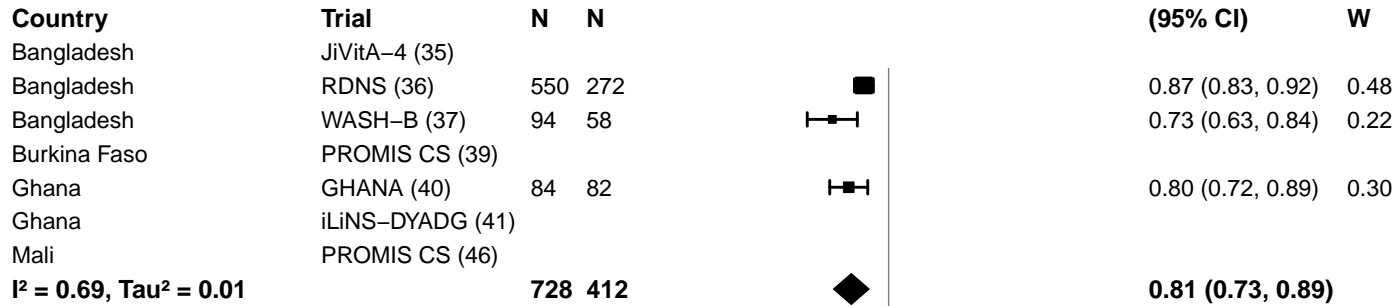

**Sanitation – Unimproved**

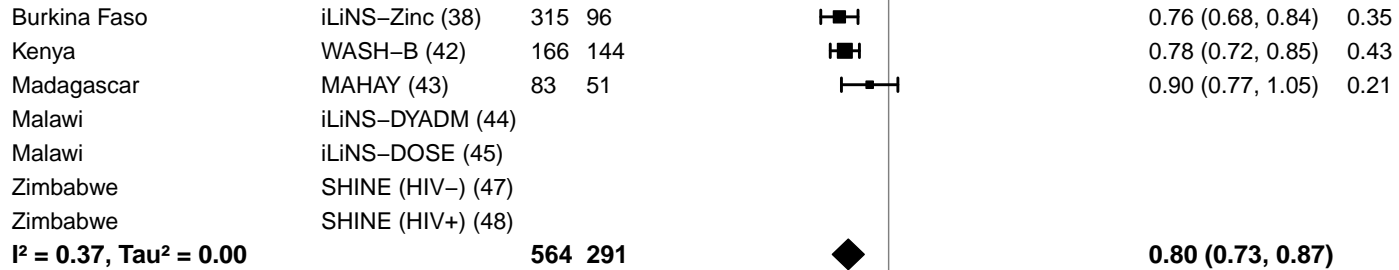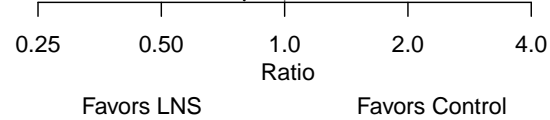

Supplemental figure 4K: Geometric mean ratio of soluble transferrin receptor concentration

4K7: Stratified by Supplement duration

**Supplement duration**

(p-diff = 0.539)

**Supplement duration – 12m or less**

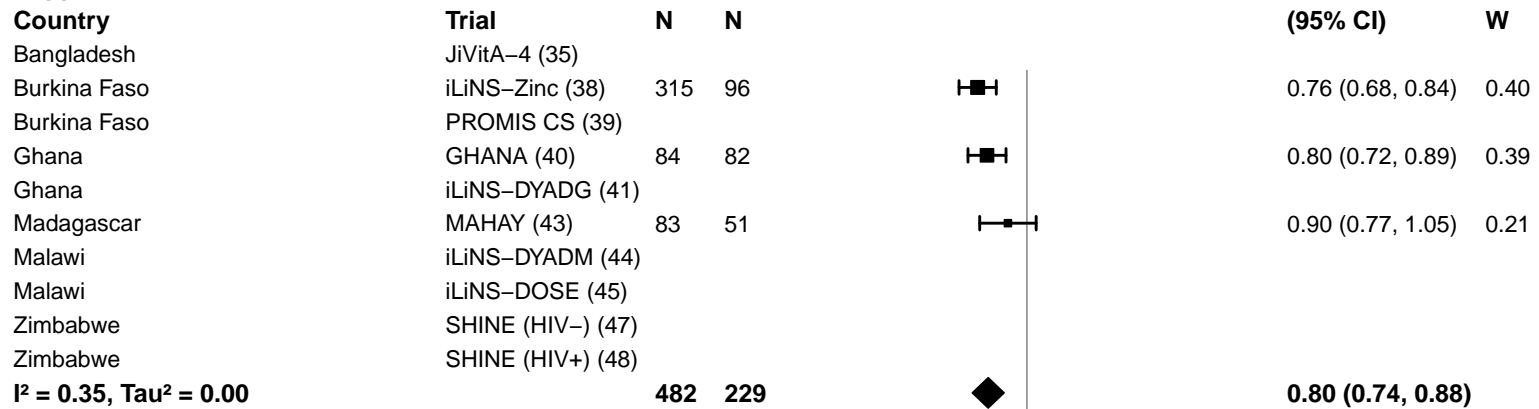

**Supplement duration – > 12m**

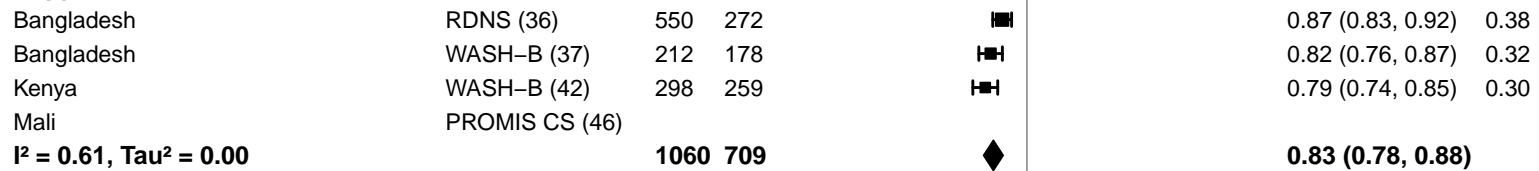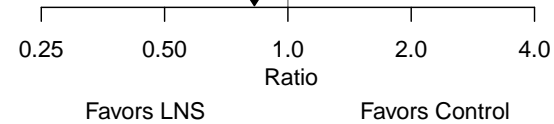

**Supplemental figure 4K: Geometric mean ratio of soluble transferrin receptor concentration**

**4K8: Stratified by Iron dose (insufficient comparisons)**

Supplemental figure 4K: Geometric mean ratio of soluble transferrin receptor concentration

4K9: Stratified by Frequency of contact

**Frequency of contact**

(p-diff = 0.208)

**Frequency of contact – Monthly**

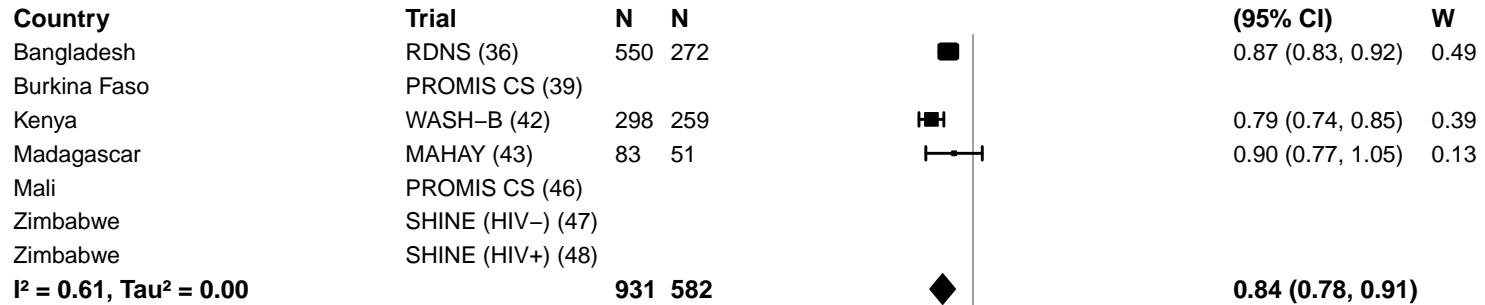

**Frequency of contact – Weekly**

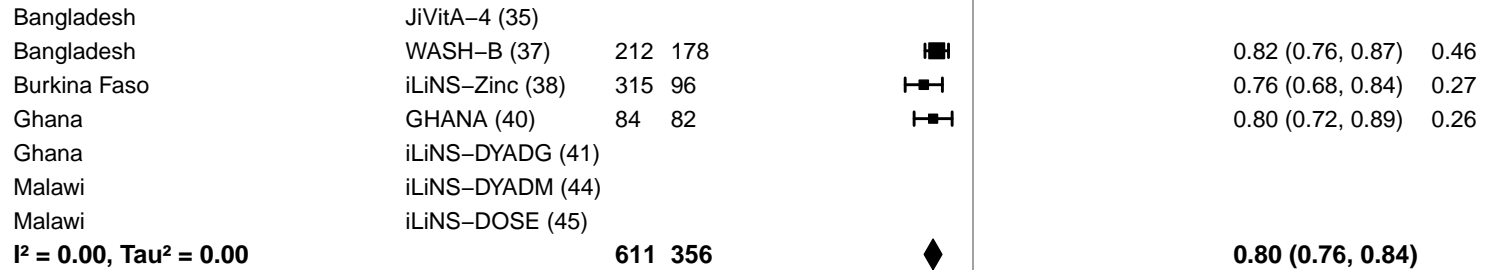

0.25 0.50 1.0 2.0 4.0  
Ratio  
Favors LNS Favors Control

**Supplemental figure 4K: Geometric mean ratio of soluble transferrin receptor concentration**

**4K10: Stratified by Average SQ-LNS compliance (insufficient comparisons)**

**Supplemental figure 4L: Elevated soluble transferrin receptor prevalence ratio**  
**4L1: Stratified by Geographic region (insufficient comparisons)**

**Supplemental figure 4L: Elevated soluble transferrin receptor prevalence ratio**

**4L2: Stratified by Anemia burden (insufficient comparisons)**

**Supplemental figure 4L: Elevated soluble transferrin receptor prevalence ratio**

**4L3: Stratified by Malaria prevalence (insufficient comparisons)**



**Supplemental figure 4L: Elevated soluble transferrin receptor prevalence ratio**

**4L4: Stratified by Inflammation burden (insufficient comparisons)**

Supplemental figure 4L: Elevated soluble transferrin receptor prevalence ratio

4L5: Stratified by Source water quality

**Source water quality**

(p-diff = 0.496)

**Source water quality – Improved**

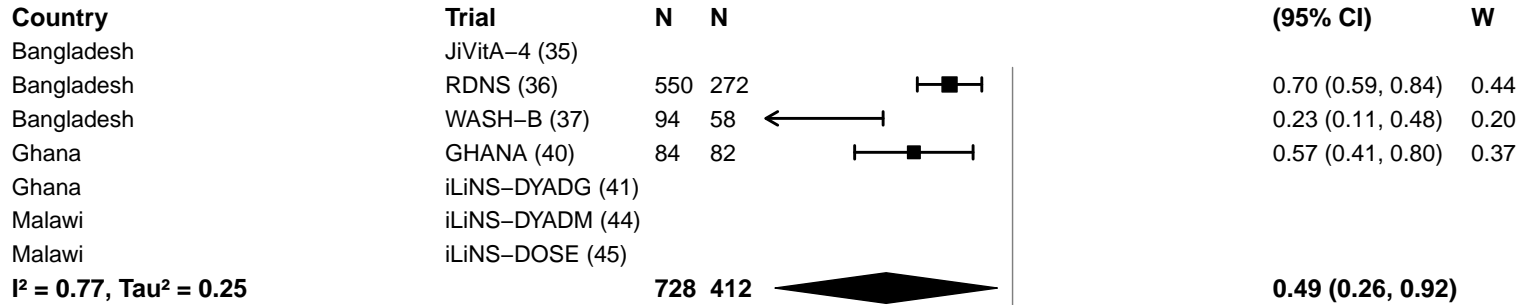

**Source water quality – Unimproved**

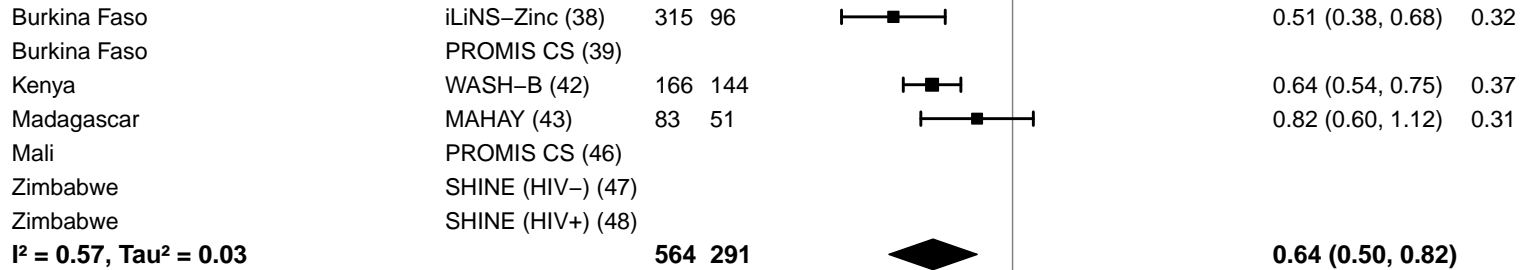

Supplemental figure 4L: Elevated soluble transferrin receptor prevalence ratio

4L6: Stratified by Sanitation

**Sanitation**  
(p-diff = 0.496)

**Sanitation – Improved**

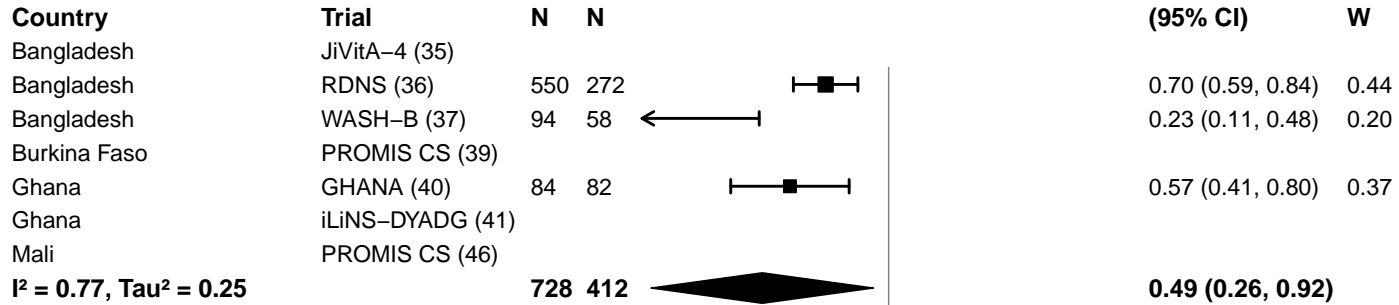

**Sanitation – Unimproved**

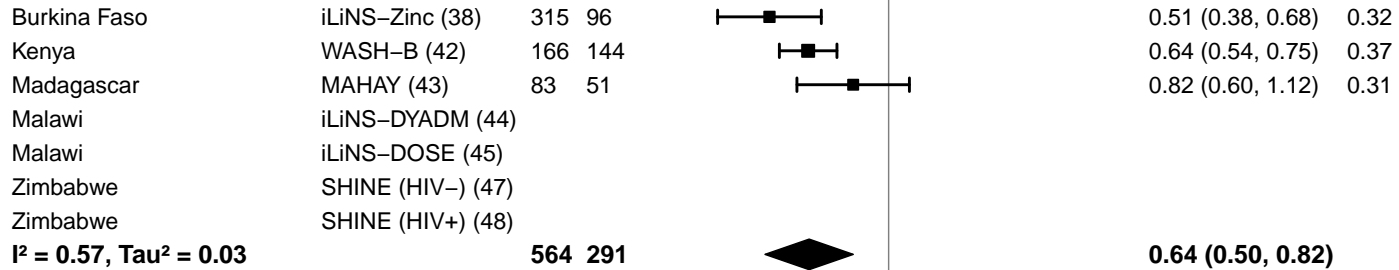

Supplemental figure 4L: Elevated soluble transferrin receptor prevalence ratio

4L7: Stratified by Supplement duration

**Supplement duration**

(p-diff = 0.692)

**Supplement duration – 12m or less**

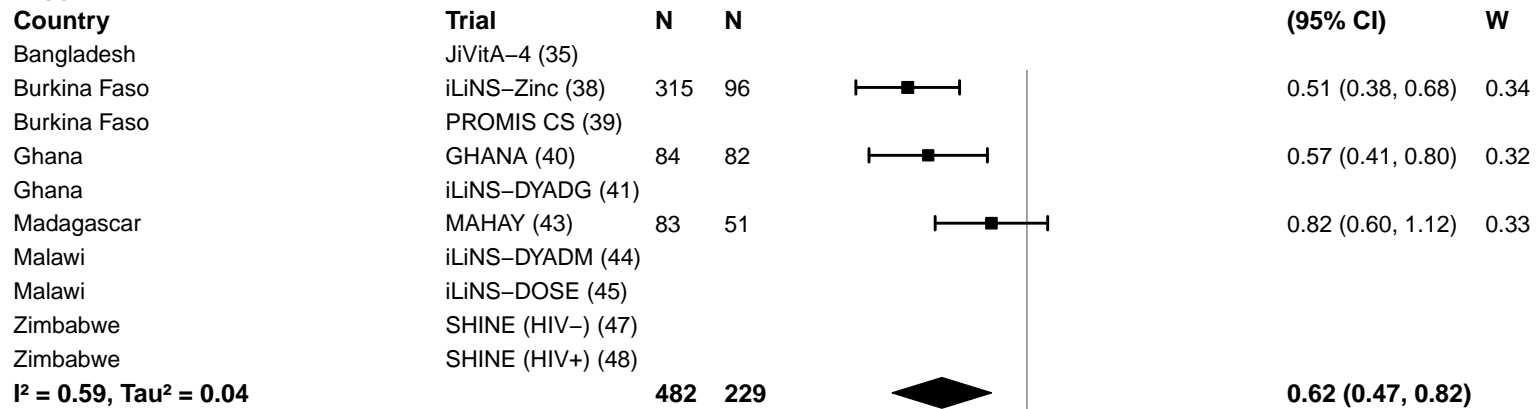

**Supplement duration – > 12m**

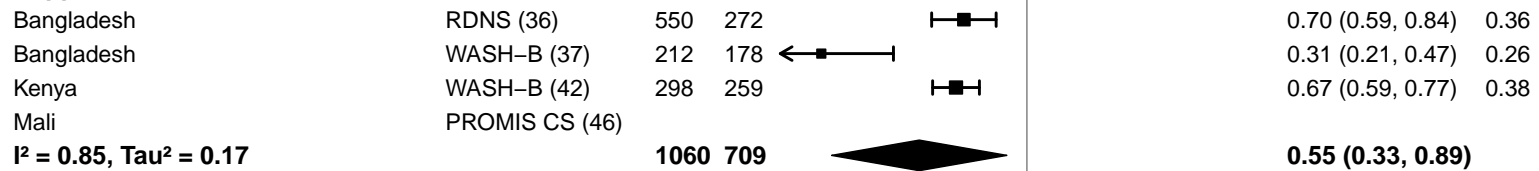

**Supplemental figure 4L: Elevated soluble transferrin receptor prevalence ratio**

**4L8: Stratified by Iron dose (insufficient comparisons)**

Supplemental figure 4L: Elevated soluble transferrin receptor prevalence ratio

4L9: Stratified by Frequency of contact

**Frequency of contact**

(p-diff = 0.001)

**Frequency of contact – Monthly**

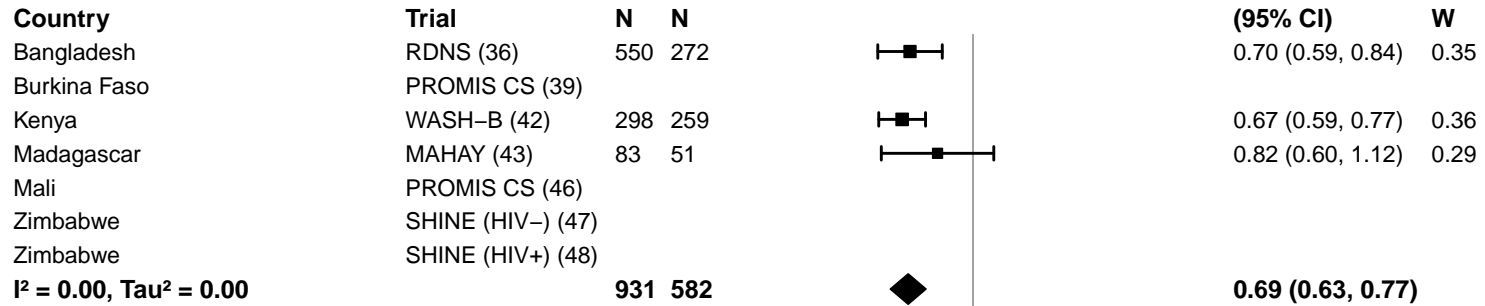

**Frequency of contact – Weekly**

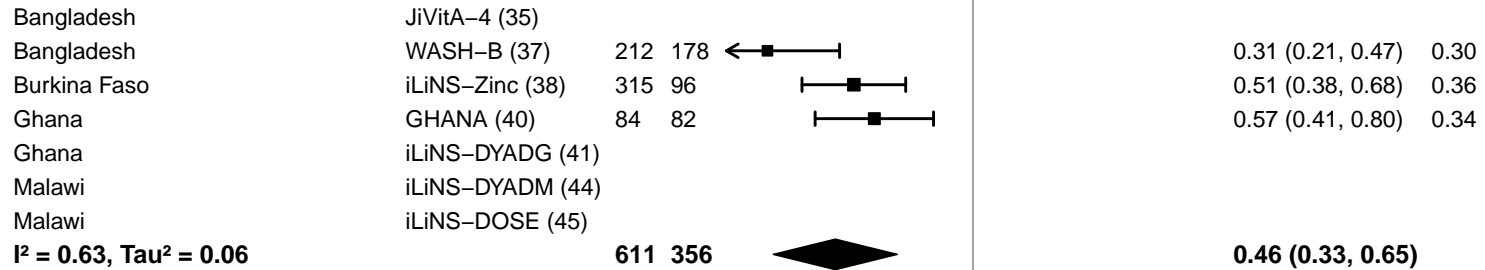

0.25 0.50 1.0 2.0 4.0  
Ratio  
Favors LNS Favors Control

**Supplemental figure 4L: Elevated soluble transferrin receptor prevalence ratio**

**4L10: Stratified by Average SQ-LNS compliance (insufficient comparisons)**

**Supplemental figure 4M: Elevated soluble transferrin receptor prevalence difference**  
**4M1: Stratified by Geographic region (insufficient comparisons)**



**Supplemental figure 4M: Elevated soluble transferrin receptor prevalence difference**

**4M2: Stratified by Anemia burden (insufficient comparisons)**

**Supplemental figure 4M: Elevated soluble transferrin receptor prevalence difference**

**4M3: Stratified by Malaria prevalence (insufficient comparisons)**

**Supplemental figure 4M: Elevated soluble transferrin receptor prevalence difference**

**4M4: Stratified by Inflammation burden (insufficient comparisons)**

Supplemental figure 4M: Elevated soluble transferrin receptor prevalence difference

4M5: Stratified by Source water quality

**Source water quality**

(p-diff = 0.841)

**Source water quality – Improved**

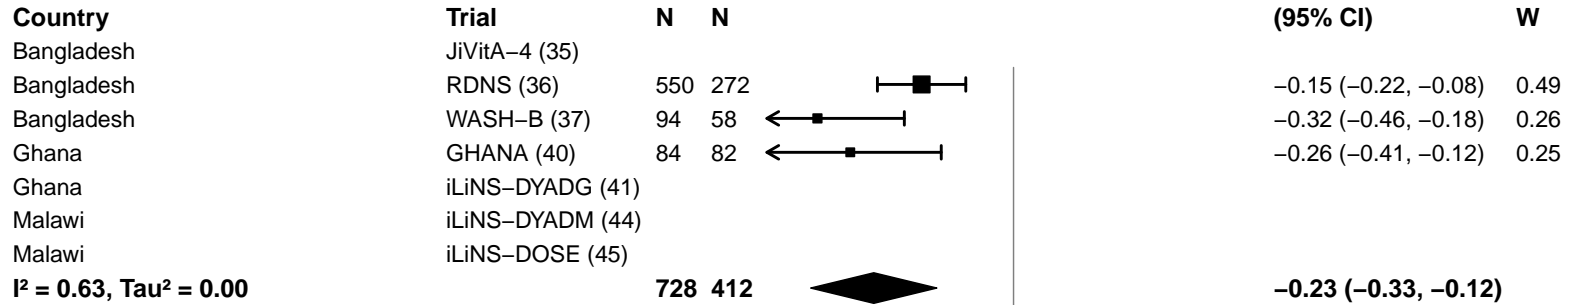

**Source water quality – Unimproved**

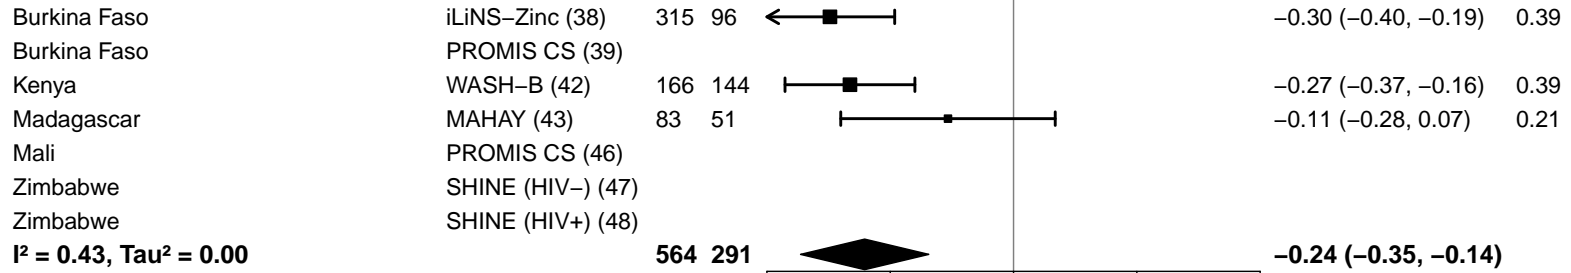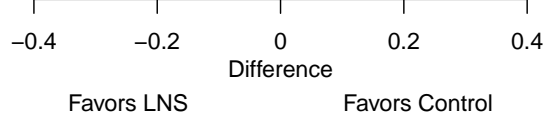

Supplemental figure 4M: Elevated soluble transferrin receptor prevalence difference

4M6: Stratified by Sanitation

**Sanitation**

(p-diff = 0.841)

**Sanitation – Improved**

**Country**

Bangladesh

Bangladesh

Bangladesh

Burkina Faso

Ghana

Ghana

Mali

**I<sup>2</sup> = 0.63, Tau<sup>2</sup> = 0.00**

**Trial**

JiVitA-4 (35)

RDNS (36)

WASH-B (37)

PROMIS CS (39)

GHANA (40)

iLiNS-DYADG (41)

PROMIS CS (46)

**N**

550

94

84

84

728

**N**

272

58

82

412

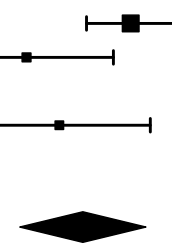

**PD**

**(95% CI)**

-0.15 (-0.22, -0.08)

-0.32 (-0.46, -0.18)

-0.26 (-0.41, -0.12)

-0.23 (-0.33, -0.12)

**W**

0.49

0.26

0.25

**Sanitation – Unimproved**

Burkina Faso

Kenya

Madagascar

Malawi

Malawi

Zimbabwe

Zimbabwe

**I<sup>2</sup> = 0.43, Tau<sup>2</sup> = 0.00**

iLiNS-Zinc (38)

WASH-B (42)

MAHAY (43)

iLiNS-DYADM (44)

iLiNS-DOSE (45)

SHINE (HIV-) (47)

SHINE (HIV+) (48)

315

166

83

564

96

144

51

291

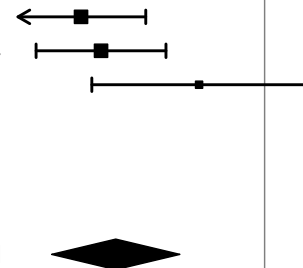

-0.4 -0.2 0 0.2 0.4

Difference

Favors LNS

Favors Control

Supplemental figure 4M: Elevated soluble transferrin receptor prevalence difference

4M7: Stratified by Supplement duration

**Supplement duration**

(p-diff = 0.385)

**Supplement duration – 12m or less**

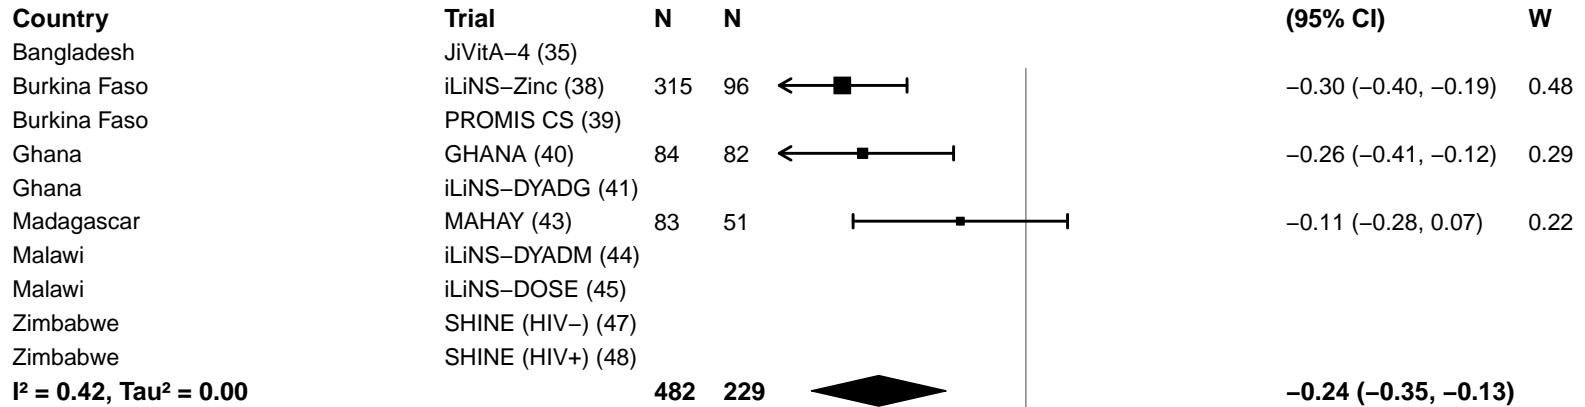

**Supplement duration – > 12m**

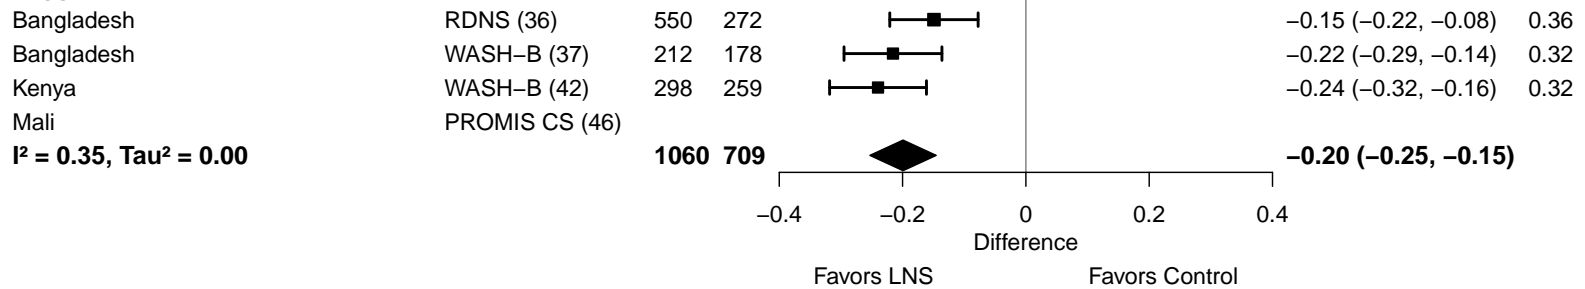

**Supplemental figure 4M: Elevated soluble transferrin receptor prevalence difference**

**4M8: Stratified by Iron dose (insufficient comparisons)**

Supplemental figure 4M: Elevated soluble transferrin receptor prevalence difference

4M9: Stratified by Frequency of contact

**Frequency of contact**

( $p$ -diff = 0.152)

**Frequency of contact – Monthly**

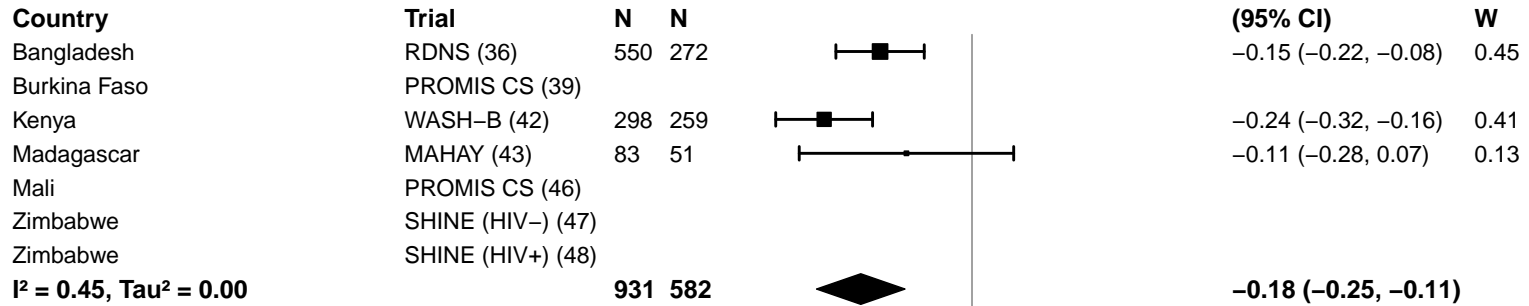

**Frequency of contact – Weekly**

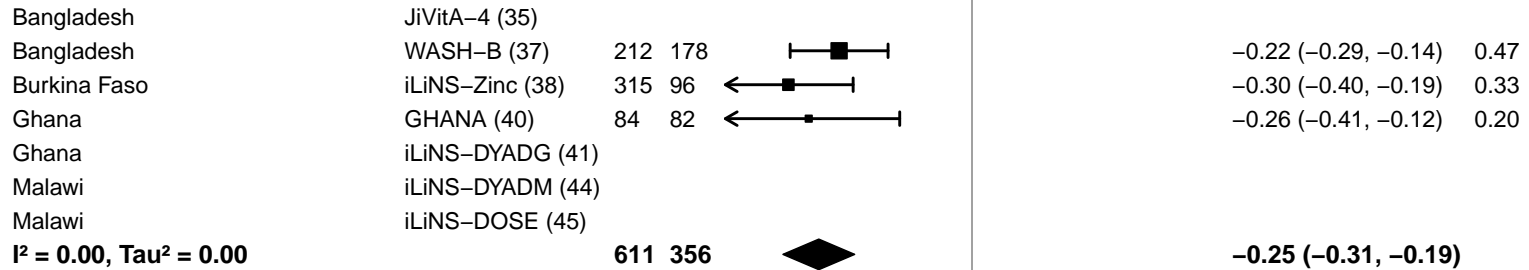

-0.4 -0.2 0 0.2 0.4  
Difference  
Favors LNS Favors Control



**Supplemental figure 4M: Elevated soluble transferrin receptor prevalence difference**

**4M10: Stratified by Average SQ-LNS compliance (insufficient comparisons)**

**Supplemental figure 4N: Geometric mean ratio of zinc protoporphyrin concentration**  
**4N1: Stratified by Geographic region (insufficient comparisons)**

**Supplemental figure 4N: Geometric mean ratio of zinc protoporphyrin concentration**

**4N2: Stratified by Anemia burden (insufficient comparisons)**

**Supplemental figure 4N: Geometric mean ratio of zinc protoporphyrin concentration**

**4N3: Stratified by Malaria prevalence (insufficient comparisons)**

**Supplemental figure 4N: Geometric mean ratio of zinc protoporphyrin concentration**

**4N4: Stratified by Inflammation burden (insufficient comparisons)**

**Supplemental figure 4N: Geometric mean ratio of zinc protoporphyrin concentration**

**4N5: Stratified by Source water quality (insufficient comparisons)**

**Supplemental figure 4N: Geometric mean ratio of zinc protoporphyrin concentration**

**4N6: Stratified by Sanitation (insufficient comparisons)**

**Supplemental figure 4N: Geometric mean ratio of zinc protoporphyrin concentration**

**4N7: Stratified by Supplement duration (insufficient comparisons)**



**Supplemental figure 4N: Geometric mean ratio of zinc protoporphyrin concentration**

**4N8: Stratified by Iron dose (insufficient comparisons)**

**Supplemental figure 4N: Geometric mean ratio of zinc protoporphyrin concentration**

**4N9: Stratified by Frequency of contact (insufficient comparisons)**

**Supplemental figure 4N: Geometric mean ratio of zinc protoporphyrin concentration**

**4N10: Stratified by Average SQ-LNS compliance (insufficient comparisons)**

## Supplemental figure 4O: Elevated zinc protoporphyrin prevalence ratio

4O1: Stratified by Geographic region (insufficient comparisons)

**Supplemental figure 4O: Elevated zinc protoporphyrin prevalence ratio**

**4O2: Stratified by Anemia burden (insufficient comparisons)**

**Supplemental figure 4O: Elevated zinc protoporphyrin prevalence ratio**

**4O3: Stratified by Malaria prevalence (insufficient comparisons)**

**Supplemental figure 4O: Elevated zinc protoporphyrin prevalence ratio**

**4O4: Stratified by Inflammation burden (insufficient comparisons)**

**Supplemental figure 4O: Elevated zinc protoporphyrin prevalence ratio**

**4O5: Stratified by Source water quality (insufficient comparisons)**



**Supplemental figure 4O: Elevated zinc protoporphyrin prevalence ratio**

**4O6: Stratified by Sanitation (insufficient comparisons)**

**Supplemental figure 4O: Elevated zinc protoporphyrin prevalence ratio**

**4O7: Stratified by Supplement duration (insufficient comparisons)**

**Supplemental figure 4O: Elevated zinc protoporphyrin prevalence ratio**

**4O8: Stratified by Iron dose (insufficient comparisons)**

**Supplemental figure 4O: Elevated zinc protoporphyrin prevalence ratio**

**4O9: Stratified by Frequency of contact (insufficient comparisons)**

**Supplemental figure 4O: Elevated zinc protoporphyrin prevalence ratio**

**4O10: Stratified by Average SQ-LNS compliance (insufficient comparisons)**

**Supplemental figure 4P: Elevated zinc protoporphyrin prevalence difference**  
**4P1: Stratified by Geographic region (insufficient comparisons)**

**Supplemental figure 4P: Elevated zinc protoporphyrin prevalence difference**

**4P2: Stratified by Anemia burden (insufficient comparisons)**

**Supplemental figure 4P: Elevated zinc protoporphyrin prevalence difference**

**4P3: Stratified by Malaria prevalence (insufficient comparisons)**



**Supplemental figure 4P: Elevated zinc protoporphyrin prevalence difference**

**4P4: Stratified by Inflammation burden (insufficient comparisons)**

**Supplemental figure 4P: Elevated zinc protoporphyrin prevalence difference**

**4P5: Stratified by Source water quality (insufficient comparisons)**

**Supplemental figure 4P: Elevated zinc protoporphyrin prevalence difference**

**4P6: Stratified by Sanitation (insufficient comparisons)**

**Supplemental figure 4P: Elevated zinc protoporphyrin prevalence difference**

**4P7: Stratified by Supplement duration (insufficient comparisons)**

**Supplemental figure 4P: Elevated zinc protoporphyrin prevalence difference**

**4P8: Stratified by Iron dose (insufficient comparisons)**

**Supplemental figure 4P: Elevated zinc protoporphyrin prevalence difference**

**4P9: Stratified by Frequency of contact (insufficient comparisons)**

**Supplemental figure 4P: Elevated zinc protoporphyrin prevalence difference**

**4P10: Stratified by Average SQ-LNS compliance (insufficient comparisons)**

**Supplemental figure 4Q: Geometric mean ratio of plasma zinc concentration**  
**4Q1: Stratified by Geographic region (insufficient comparisons)**



**Supplemental figure 4Q: Geometric mean ratio of plasma zinc concentration**

**4Q2: Stratified by Anemia burden (insufficient comparisons)**

**Supplemental figure 4Q: Geometric mean ratio of plasma zinc concentration**

**4Q3: Stratified by Malaria prevalence (insufficient comparisons)**

**Supplemental figure 4Q: Geometric mean ratio of plasma zinc concentration**

**4Q4: Stratified by Inflammation burden (insufficient comparisons)**

**Supplemental figure 4Q: Geometric mean ratio of plasma zinc concentration**

**4Q5: Stratified by Source water quality (insufficient comparisons)**

**Supplemental figure 4Q: Geometric mean ratio of plasma zinc concentration**

**4Q6: Stratified by Sanitation (insufficient comparisons)**

**Supplemental figure 4Q: Geometric mean ratio of plasma zinc concentration**

**4Q7: Stratified by Supplement duration (insufficient comparisons)**

**Supplemental figure 4Q: Geometric mean ratio of plasma zinc concentration**

**4Q8: Stratified by Iron dose (insufficient comparisons)**

**Supplemental figure 4Q: Geometric mean ratio of plasma zinc concentration**

**4Q9: Stratified by Frequency of contact (insufficient comparisons)**



**Supplemental figure 4Q: Geometric mean ratio of plasma zinc concentration**

**4Q10: Stratified by Average SQ-LNS compliance (insufficient comparisons)**

## Supplemental figure 4R: Geometric mean ratio of retinol concentration

4R1: Stratified by Geographic region (insufficient comparisons)

**Supplemental figure 4R: Geometric mean ratio of retinol concentration**

**4R2: Stratified by Anemia burden (insufficient comparisons)**

**Supplemental figure 4R: Geometric mean ratio of retinol concentration**

**4R3: Stratified by Malaria prevalence (insufficient comparisons)**

**Supplemental figure 4R: Geometric mean ratio of retinol concentration**

**4R4: Stratified by Inflammation burden (insufficient comparisons)**

**Supplemental figure 4R: Geometric mean ratio of retinol concentration**

**4R5: Stratified by Source water quality (insufficient comparisons)**

**Supplemental figure 4R: Geometric mean ratio of retinol concentration**

**4R6: Stratified by Sanitation (insufficient comparisons)**

**Supplemental figure 4R: Geometric mean ratio of retinol concentration**

**4R7: Stratified by Supplement duration (insufficient comparisons)**



**Supplemental figure 4R: Geometric mean ratio of retinol concentration**

**4R8: Stratified by Iron dose (insufficient comparisons)**

**Supplemental figure 4R: Geometric mean ratio of retinol concentration**

**4R9: Stratified by Frequency of contact (insufficient comparisons)**

**Supplemental figure 4R: Geometric mean ratio of retinol concentration**

**4R10: Stratified by Average SQ-LNS compliance (insufficient comparisons)**

**Supplemental figure 4S: Low vitamin A (retinol < 0.70  $\mu\text{mol/L}$ ) prevalence ratio  
4S1: Stratified by Geographic region (insufficient comparisons)**

**Supplemental figure 4S: Low vitamin A (retinol < 0.70  $\mu\text{mol/L}$ ) prevalence ratio**

**4S2: Stratified by Anemia burden (insufficient comparisons)**

**Supplemental figure 4S: Low vitamin A (retinol < 0.70  $\mu\text{mol/L}$ ) prevalence ratio**

**4S3: Stratified by Malaria prevalence (insufficient comparisons)**

**Supplemental figure 4S: Low vitamin A (retinol < 0.70  $\mu\text{mol/L}$ ) prevalence ratio**

**4S4: Stratified by Inflammation burden (insufficient comparisons)**

**Supplemental figure 4S: Low vitamin A (retinol < 0.70  $\mu\text{mol/L}$ ) prevalence ratio**

**4S5: Stratified by Source water quality (insufficient comparisons)**



**Supplemental figure 4S: Low vitamin A (retinol < 0.70  $\mu\text{mol/L}$ ) prevalence ratio**

**4S6: Stratified by Sanitation (insufficient comparisons)**

**Supplemental figure 4S: Low vitamin A (retinol < 0.70  $\mu\text{mol/L}$ ) prevalence ratio**

**4S7: Stratified by Supplement duration (insufficient comparisons)**

**Supplemental figure 4S: Low vitamin A (retinol < 0.70  $\mu\text{mol/L}$ ) prevalence ratio**

**4S8: Stratified by Iron dose (insufficient comparisons)**

**Supplemental figure 4S: Low vitamin A (retinol < 0.70  $\mu\text{mol/L}$ ) prevalence ratio**

**4S9: Stratified by Frequency of contact (insufficient comparisons)**

**Supplemental figure 4S: Low vitamin A (retinol < 0.70  $\mu\text{mol/L}$ ) prevalence ratio**

**4S10: Stratified by Average SQ-LNS compliance (insufficient comparisons)**

**Supplemental figure 4T: Low vitamin A (retinol < 0.70  $\mu\text{mol/L}$ ) prevalence difference**  
**4T1: Stratified by Geographic region (insufficient comparisons)**

**Supplemental figure 4T: Low vitamin A (retinol < 0.70  $\mu\text{mol/L}$ ) prevalence difference**

**4T2: Stratified by Anemia burden (insufficient comparisons)**

**Supplemental figure 4T: Low vitamin A (retinol < 0.70  $\mu\text{mol/L}$ ) prevalence difference**

**4T3: Stratified by Malaria prevalence (insufficient comparisons)**



**Supplemental figure 4T: Low vitamin A (retinol < 0.70  $\mu\text{mol/L}$ ) prevalence difference**

**4T4: Stratified by Inflammation burden (insufficient comparisons)**

**Supplemental figure 4T: Low vitamin A (retinol < 0.70  $\mu\text{mol/L}$ ) prevalence difference**

**4T5: Stratified by Source water quality (insufficient comparisons)**

**Supplemental figure 4T: Low vitamin A (retinol < 0.70  $\mu\text{mol/L}$ ) prevalence difference**

**4T6: Stratified by Sanitation (insufficient comparisons)**

**Supplemental figure 4T: Low vitamin A (retinol < 0.70  $\mu\text{mol/L}$ ) prevalence difference**

**4T7: Stratified by Supplement duration (insufficient comparisons)**

**Supplemental figure 4T: Low vitamin A (retinol < 0.70  $\mu\text{mol/L}$ ) prevalence difference**

**4T8: Stratified by Iron dose (insufficient comparisons)**

**Supplemental figure 4T: Low vitamin A (retinol < 0.70  $\mu\text{mol/L}$ ) prevalence difference**

**4T9: Stratified by Frequency of contact (insufficient comparisons)**

**Supplemental figure 4T: Low vitamin A (retinol < 0.70 µmol/L) prevalence difference**

**4T10: Stratified by Average SQ-LNS compliance (insufficient comparisons)**

**Supplemental figure 4U: Marginal vitamin A (retinol < 1.05  $\mu\text{mol/L}$ ) prevalence ratio**  
**4U1: Stratified by Geographic region (insufficient comparisons)**



**Supplemental figure 4U: Marginal vitamin A (retinol < 1.05  $\mu\text{mol/L}$ ) prevalence ratio**

**4U2: Stratified by Anemia burden (insufficient comparisons)**

**Supplemental figure 4U: Marginal vitamin A (retinol < 1.05  $\mu\text{mol/L}$ ) prevalence ratio**

**4U3: Stratified by Malaria prevalence (insufficient comparisons)**

**Supplemental figure 4U: Marginal vitamin A (retinol < 1.05  $\mu\text{mol/L}$ ) prevalence ratio**

**4U4: Stratified by Inflammation burden (insufficient comparisons)**

**Supplemental figure 4U: Marginal vitamin A (retinol < 1.05  $\mu\text{mol/L}$ ) prevalence ratio**

**4U5: Stratified by Source water quality (insufficient comparisons)**

**Supplemental figure 4U: Marginal vitamin A (retinol < 1.05  $\mu\text{mol/L}$ ) prevalence ratio**

**4U6: Stratified by Sanitation (insufficient comparisons)**

**Supplemental figure 4U: Marginal vitamin A (retinol < 1.05  $\mu\text{mol/L}$ ) prevalence ratio**

**4U7: Stratified by Supplement duration (insufficient comparisons)**

**Supplemental figure 4U: Marginal vitamin A (retinol < 1.05  $\mu\text{mol/L}$ ) prevalence ratio**

**4U8: Stratified by Iron dose (insufficient comparisons)**

**Supplemental figure 4U: Marginal vitamin A (retinol < 1.05  $\mu\text{mol/L}$ ) prevalence ratio**

**4U9: Stratified by Frequency of contact (insufficient comparisons)**



**Supplemental figure 4U: Marginal vitamin A (retinol < 1.05  $\mu\text{mol/L}$ ) prevalence ratio**

**4U10: Stratified by Average SQ-LNS compliance (insufficient comparisons)**

**Supplemental figure 4V: Marginal vitamin A (retinol < 1.05  $\mu\text{mol/L}$ ) prevalence difference**  
**4V1: Stratified by Geographic region (insufficient comparisons)**

**Supplemental figure 4V: Marginal vitamin A (retinol < 1.05  $\mu\text{mol/L}$ ) prevalence difference**

**4V2: Stratified by Anemia burden (insufficient comparisons)**

**Supplemental figure 4V: Marginal vitamin A (retinol < 1.05  $\mu\text{mol/L}$ ) prevalence difference**

**4V3: Stratified by Malaria prevalence (insufficient comparisons)**

**Supplemental figure 4V: Marginal vitamin A (retinol < 1.05  $\mu\text{mol/L}$ ) prevalence difference**

**4V4: Stratified by Inflammation burden (insufficient comparisons)**

**Supplemental figure 4V: Marginal vitamin A (retinol < 1.05  $\mu\text{mol/L}$ ) prevalence difference**

**4V5: Stratified by Source water quality (insufficient comparisons)**

**Supplemental figure 4V: Marginal vitamin A (retinol < 1.05  $\mu\text{mol/L}$ ) prevalence difference**

**4V6: Stratified by Sanitation (insufficient comparisons)**

**Supplemental figure 4V: Marginal vitamin A (retinol < 1.05  $\mu\text{mol/L}$ ) prevalence difference**

**4V7: Stratified by Supplement duration (insufficient comparisons)**



**Supplemental figure 4V: Marginal vitamin A (retinol < 1.05  $\mu\text{mol/L}$ ) prevalence difference**

**4V8: Stratified by Iron dose (insufficient comparisons)**

**Supplemental figure 4V: Marginal vitamin A (retinol < 1.05  $\mu\text{mol/L}$ ) prevalence difference**

**4V9: Stratified by Frequency of contact (insufficient comparisons)**

**Supplemental figure 4V: Marginal vitamin A (retinol < 1.05  $\mu\text{mol/L}$ ) prevalence difference**

**4V10: Stratified by Average SQ-LNS compliance (insufficient comparisons)**

**Supplemental figure 4W: Geometric mean ratio of retinol binding protein concentration**  
**4W1: Stratified by Geographic region (insufficient comparisons)**

**Supplemental figure 4W: Geometric mean ratio of retinol binding protein concentration**

**4W2: Stratified by Anemia burden (insufficient comparisons)**

**Supplemental figure 4W: Geometric mean ratio of retinol binding protein concentration**

**4W3: Stratified by Malaria prevalence (insufficient comparisons)**

**Supplemental figure 4W: Geometric mean ratio of retinol binding protein concentration**

**4W4: Stratified by Inflammation burden (insufficient comparisons)**

**Supplemental figure 4W: Geometric mean ratio of retinol binding protein concentration**

**4W5: Stratified by Source water quality (insufficient comparisons)**



**Supplemental figure 4W: Geometric mean ratio of retinol binding protein concentration**

**4W6: Stratified by Sanitation (insufficient comparisons)**

**Supplemental figure 4W: Geometric mean ratio of retinol binding protein concentration**

**4W7: Stratified by Supplement duration (insufficient comparisons)**

**Supplemental figure 4W: Geometric mean ratio of retinol binding protein concentration**

**4W8: Stratified by Iron dose (insufficient comparisons)**

**Supplemental figure 4W: Geometric mean ratio of retinol binding protein concentration**

**4W9: Stratified by Frequency of contact (insufficient comparisons)**

**Supplemental figure 4W: Geometric mean ratio of retinol binding protein concentration**

**4W10: Stratified by Average SQ-LNS compliance (insufficient comparisons)**

**Supplemental figure 4X: Low vitamin A status (RBP < 0.70  $\mu\text{mol/L}$ ) prevalence ratio  
4X1: Stratified by Geographic region (insufficient comparisons)**

**Supplemental figure 4X: Low vitamin A status (RBP < 0.70  $\mu\text{mol/L}$ ) prevalence ratio**

**4X2: Stratified by Anemia burden (insufficient comparisons)**

**Supplemental figure 4X: Low vitamin A status (RBP < 0.70  $\mu\text{mol/L}$ ) prevalence ratio**

**4X3: Stratified by Malaria prevalence (insufficient comparisons)**



**Supplemental figure 4X: Low vitamin A status (RBP < 0.70  $\mu\text{mol/L}$ ) prevalence ratio**

**4X4: Stratified by Inflammation burden (insufficient comparisons)**

**Supplemental figure 4X: Low vitamin A status (RBP < 0.70  $\mu\text{mol/L}$ ) prevalence ratio**

**4X5: Stratified by Source water quality (insufficient comparisons)**

**Supplemental figure 4X: Low vitamin A status (RBP < 0.70  $\mu\text{mol/L}$ ) prevalence ratio**

**4X6: Stratified by Sanitation (insufficient comparisons)**

**Supplemental figure 4X: Low vitamin A status (RBP < 0.70  $\mu\text{mol/L}$ ) prevalence ratio**

**4X7: Stratified by Supplement duration (insufficient comparisons)**

**Supplemental figure 4X: Low vitamin A status (RBP < 0.70  $\mu\text{mol/L}$ ) prevalence ratio**

**4X8: Stratified by Iron dose (insufficient comparisons)**

**Supplemental figure 4X: Low vitamin A status (RBP < 0.70  $\mu\text{mol/L}$ ) prevalence ratio**

**4X9: Stratified by Frequency of contact (insufficient comparisons)**

**Supplemental figure 4X: Low vitamin A status (RBP < 0.70  $\mu\text{mol/L}$ ) prevalence ratio**

**4X10: Stratified by Average SQ-LNS compliance (insufficient comparisons)**

**Supplemental figure 4Y: Low vitamin A status (RBP < 0.70  $\mu\text{mol/L}$ ) prevalence difference  
4Y1: Stratified by Geographic region (insufficient comparisons)**



**Supplemental figure 4Y: Low vitamin A status (RBP < 0.70  $\mu\text{mol/L}$ ) prevalence difference**

**4Y2: Stratified by Anemia burden (insufficient comparisons)**

**Supplemental figure 4Y: Low vitamin A status (RBP < 0.70  $\mu\text{mol/L}$ ) prevalence difference**

**4Y3: Stratified by Malaria prevalence (insufficient comparisons)**

**Supplemental figure 4Y: Low vitamin A status (RBP < 0.70  $\mu\text{mol/L}$ ) prevalence difference**

**4Y4: Stratified by Inflammation burden (insufficient comparisons)**

**Supplemental figure 4Y: Low vitamin A status (RBP < 0.70  $\mu\text{mol/L}$ ) prevalence difference**

**4Y5: Stratified by Source water quality (insufficient comparisons)**

**Supplemental figure 4Y: Low vitamin A status (RBP < 0.70  $\mu\text{mol/L}$ ) prevalence difference**

**4Y6: Stratified by Sanitation (insufficient comparisons)**

**Supplemental figure 4Y: Low vitamin A status (RBP < 0.70  $\mu\text{mol/L}$ ) prevalence difference**

**4Y7: Stratified by Supplement duration (insufficient comparisons)**

**Supplemental figure 4Y: Low vitamin A status (RBP < 0.70  $\mu\text{mol/L}$ ) prevalence difference**

**4Y8: Stratified by Iron dose (insufficient comparisons)**

**Supplemental figure 4Y: Low vitamin A status (RBP < 0.70  $\mu\text{mol/L}$ ) prevalence difference**

**4Y9: Stratified by Frequency of contact (insufficient comparisons)**



**Supplemental figure 4Y: Low vitamin A status (RBP < 0.70  $\mu\text{mol/L}$ ) prevalence difference**

**4Y10: Stratified by Average SQ-LNS compliance (insufficient comparisons)**

**Supplemental figure 4Z: Marginal vitamin A status (RBP < 1.05  $\mu\text{mol/L}$ ) prevalence ratio  
4Z1: Stratified by Geographic region (insufficient comparisons)**

**Supplemental figure 4Z: Marginal vitamin A status (RBP < 1.05  $\mu\text{mol/L}$ ) prevalence ratio**

**4Z2: Stratified by Anemia burden (insufficient comparisons)**

**Supplemental figure 4Z: Marginal vitamin A status (RBP < 1.05  $\mu$ mol/L) prevalence ratio**

**4Z3: Stratified by Malaria prevalence (insufficient comparisons)**

**Supplemental figure 4Z: Marginal vitamin A status (RBP < 1.05  $\mu\text{mol/L}$ ) prevalence ratio**

**4Z4: Stratified by Inflammation burden (insufficient comparisons)**

**Supplemental figure 4Z: Marginal vitamin A status (RBP < 1.05  $\mu$ mol/L) prevalence ratio**

**4Z5: Stratified by Source water quality (insufficient comparisons)**

**Supplemental figure 4Z: Marginal vitamin A status (RBP < 1.05  $\mu\text{mol/L}$ ) prevalence ratio**

**4Z6: Stratified by Sanitation (insufficient comparisons)**

**Supplemental figure 4Z: Marginal vitamin A status (RBP < 1.05  $\mu\text{mol/L}$ ) prevalence ratio**

**4Z7: Stratified by Supplement duration (insufficient comparisons)**



**Supplemental figure 4Z: Marginal vitamin A status (RBP < 1.05  $\mu\text{mol/L}$ ) prevalence ratio**

**4Z8: Stratified by Iron dose (insufficient comparisons)**

**Supplemental figure 4Z: Marginal vitamin A status (RBP < 1.05  $\mu\text{mol/L}$ ) prevalence ratio**

**4Z9: Stratified by Frequency of contact (insufficient comparisons)**

**Supplemental figure 4Z: Marginal vitamin A status (RBP < 1.05  $\mu\text{mol/L}$ ) prevalence ratio**

**4Z10: Stratified by Average SQ-LNS compliance (insufficient comparisons)**

**Supplemental figure 4AA: Marginal vitamin A status (RBP < 1.05  $\mu\text{mol/L}$ ) prevalence difference**  
**4AA1: Stratified by Geographic region (insufficient comparisons)**

**Supplemental figure 4AA: Marginal vitamin A status (RBP < 1.05  $\mu\text{mol/L}$ ) prevalence difference**

**4AA2: Stratified by Anemia burden (insufficient comparisons)**

**Supplemental figure 4AA: Marginal vitamin A status (RBP < 1.05  $\mu\text{mol/L}$ ) prevalence difference**

**4AA3: Stratified by Malaria prevalence (insufficient comparisons)**

**Supplemental figure 4AA: Marginal vitamin A status (RBP < 1.05  $\mu\text{mol/L}$ ) prevalence difference**

**4AA4: Stratified by Inflammation burden (insufficient comparisons)**

Supplemental figure 4AA: Marginal vitamin A status (RBP < 1.05  $\mu\text{mol/L}$ ) prevalence difference

4AA5: Stratified by Source water quality (insufficient comparisons)



**Supplemental figure 4AA: Marginal vitamin A status (RBP < 1.05  $\mu\text{mol/L}$ ) prevalence difference**

**4AA6: Stratified by Sanitation (insufficient comparisons)**

**Supplemental figure 4AA: Marginal vitamin A status (RBP < 1.05  $\mu\text{mol/L}$ ) prevalence difference**

**4AA7: Stratified by Supplement duration (insufficient comparisons)**

**Supplemental figure 4AA: Marginal vitamin A status (RBP < 1.05  $\mu\text{mol/L}$ ) prevalence difference**

**4AA8: Stratified by Iron dose (insufficient comparisons)**

**Supplemental figure 4AA: Marginal vitamin A status (RBP < 1.05  $\mu\text{mol/L}$ ) prevalence difference**

**4AA9: Stratified by Frequency of contact (insufficient comparisons)**

**Supplemental figure 4AA: Marginal vitamin A status (RBP < 1.05  $\mu\text{mol/L}$ ) prevalence difference**

**4AA10: Stratified by Average SQ-LNS compliance (insufficient comparisons)**

# Supplemental figure 5: Sensitivity analyses of effect modification of SQ-LNS on biochemical outcomes by study-level effect modifiers

## Contents

|                                                                                                             |           |
|-------------------------------------------------------------------------------------------------------------|-----------|
| <b>Supplemental figure 5A: Difference in mean differences in hemoglobin concentration</b>                   | <b>4</b>  |
| 5A1: By study context effect modifiers . . . . .                                                            | 4         |
| 5A2: By study design effect modifiers . . . . .                                                             | 5         |
| <b>Supplemental figure 5B: Ratio of anemia prevalence ratios</b>                                            | <b>6</b>  |
| 5B1: By study context effect modifiers . . . . .                                                            | 6         |
| 5B2: By study design effect modifiers . . . . .                                                             | 7         |
| <b>Supplemental figure 5C: Difference in anemia prevalence differences</b>                                  | <b>8</b>  |
| 5C1: By study context effect modifiers . . . . .                                                            | 8         |
| 5C2: By study design effect modifiers . . . . .                                                             | 9         |
| <b>Supplemental figure 5D: Ratio of moderate-to-severe anemia prevalence ratios</b>                         | <b>10</b> |
| 5D1: By study context effect modifiers . . . . .                                                            | 10        |
| 5D2: By study design effect modifiers . . . . .                                                             | 11        |
| <b>Supplemental figure 5E: Difference in moderate-to-severe anemia prevalence differences</b>               | <b>12</b> |
| 5E1: By study context effect modifiers . . . . .                                                            | 12        |
| 5E2: By study design effect modifiers . . . . .                                                             | 13        |
| <b>Supplemental figure 5F: Ratio of geometric mean ratios of ferritin concentration</b>                     | <b>14</b> |
| 5F1: By study context effect modifiers . . . . .                                                            | 14        |
| 5F2: By study design effect modifiers . . . . .                                                             | 15        |
| <b>Supplemental figure 5G: Ratio of iron deficiency (ferritin &lt; 12 µg/L) prevalence ratios</b>           | <b>16</b> |
| 5G1: By study context effect modifiers . . . . .                                                            | 16        |
| 5G2: By study design effect modifiers . . . . .                                                             | 17        |
| <b>Supplemental figure 5H: Difference in iron deficiency (ferritin &lt; 12 µg/L) prevalence differences</b> | <b>18</b> |
| 5H1: By study context effect modifiers . . . . .                                                            | 18        |
| 5H2: By study design effect modifiers . . . . .                                                             | 19        |

|                                                                                                                          |           |
|--------------------------------------------------------------------------------------------------------------------------|-----------|
| <b>Supplemental figure 5I: Ratio of iron deficiency anemia prevalence ratios</b>                                         | <b>20</b> |
| 5I1: By study context effect modifiers . . . . .                                                                         | 20        |
| 5I2: By study design effect modifiers . . . . .                                                                          | 21        |
| <b>Supplemental figure 5J: Difference in iron deficiency anemia prevalence differences</b>                               | <b>22</b> |
| 5J1: By study context effect modifiers . . . . .                                                                         | 22        |
| 5J2: By study design effect modifiers . . . . .                                                                          | 23        |
| <b>Supplemental figure 5K: Ratio of geometric mean ratios of soluble transferrin receptor concentration</b>              | <b>24</b> |
| 5K1: By study context effect modifiers . . . . .                                                                         | 24        |
| 5K2: By study design effect modifiers . . . . .                                                                          | 25        |
| <b>Supplemental figure 5L: Ratio of elevated soluble transferrin receptor prevalence ratios</b>                          | <b>26</b> |
| 5L1: By study context effect modifiers . . . . .                                                                         | 26        |
| 5L2: By study design effect modifiers . . . . .                                                                          | 27        |
| <b>Supplemental figure 5M: Difference in elevated soluble transferrin receptor prevalence differences</b>                | <b>28</b> |
| 5M1: By study context effect modifiers . . . . .                                                                         | 28        |
| 5M2: By study design effect modifiers . . . . .                                                                          | 29        |
| <b>Supplemental figure 5N: Ratio of geometric mean ratios of zinc protoporphyrin concentration</b>                       | <b>30</b> |
| 5N1: By study context effect modifiers (insufficient comparisons) . . . . .                                              | 30        |
| 5N2: By study design effect modifiers (insufficient comparisons) . . . . .                                               | 31        |
| <b>Supplemental figure 5O: Ratio of elevated zinc protoporphyrin prevalence ratios</b>                                   | <b>32</b> |
| 5O1: By study context effect modifiers (insufficient comparisons) . . . . .                                              | 32        |
| 5O2: By study design effect modifiers (insufficient comparisons) . . . . .                                               | 33        |
| <b>Supplemental figure 5P: Difference in elevated zinc protoporphyrin prevalence differences</b>                         | <b>34</b> |
| 5P1: By study context effect modifiers (insufficient comparisons) . . . . .                                              | 34        |
| 5P2: By study design effect modifiers (insufficient comparisons) . . . . .                                               | 35        |
| <b>Supplemental figure 5Q: Ratio of geometric mean ratios of plasma zinc concentration</b>                               | <b>36</b> |
| 5Q1: By study context effect modifiers (insufficient comparisons) . . . . .                                              | 36        |
| 5Q2: By study design effect modifiers (insufficient comparisons) . . . . .                                               | 37        |
| <b>Supplemental figure 5R: Ratio of geometric mean ratios of retinol concentration</b>                                   | <b>38</b> |
| 5R1: By study context effect modifiers (insufficient comparisons) . . . . .                                              | 38        |
| 5R2: By study design effect modifiers (insufficient comparisons) . . . . .                                               | 39        |
| <b>Supplemental figure 5S: Ratio of low vitamin A (retinol &lt; 0.70 <math>\mu\text{mol/L}</math>) prevalence ratios</b> | <b>40</b> |
| 5S1: By study context effect modifiers (insufficient comparisons) . . . . .                                              | 40        |
| 5S2: By study design effect modifiers (insufficient comparisons) . . . . .                                               | 41        |

|                                                                                                                       |           |
|-----------------------------------------------------------------------------------------------------------------------|-----------|
| <b>Supplemental figure 5T: Difference in low vitamin A (retinol &lt; 0.70 µmol/L) prevalence differences</b>          | <b>42</b> |
| 5T1: By study context effect modifiers (insufficient comparisons) . . . . .                                           | 42        |
| 5T2: By study design effect modifiers (insufficient comparisons) . . . . .                                            | 43        |
| <b>Supplemental figure 5U: Ratio of marginal vitamin A (retinol &lt; 1.05 µmol/L) prevalence ratios</b>               | <b>44</b> |
| 5U1: By study context effect modifiers (insufficient comparisons) . . . . .                                           | 44        |
| 5U2: By study design effect modifiers (insufficient comparisons) . . . . .                                            | 45        |
| <b>Supplemental figure 5V: Difference in marginal vitamin A (retinol &lt; 1.05 µmol/L) prevalence differences</b>     | <b>46</b> |
| 5V1: By study context effect modifiers (insufficient comparisons) . . . . .                                           | 46        |
| 5V2: By study design effect modifiers (insufficient comparisons) . . . . .                                            | 47        |
| <b>Supplemental figure 5W: Ratio of geometric mean ratio of retinol binding protein concentrations</b>                | <b>48</b> |
| 5W1: By study context effect modifiers (insufficient comparisons) . . . . .                                           | 48        |
| 5W2: By study design effect modifiers (insufficient comparisons) . . . . .                                            | 49        |
| <b>Supplemental figure 5X: Ratio of Low vitamin A status (RBP &lt; 0.70 µmol/L) prevalence ratios</b>                 | <b>50</b> |
| 5X1: By study context effect modifiers (insufficient comparisons) . . . . .                                           | 50        |
| 5X2: By study design effect modifiers (insufficient comparisons) . . . . .                                            | 51        |
| <b>Supplemental figure 5Y: Difference in low vitamin A status (RBP &lt; 0.70 µmol/L) prevalence differences</b>       | <b>52</b> |
| 5Y1: By study context effect modifiers (insufficient comparisons) . . . . .                                           | 52        |
| 5Y2: By study design effect modifiers (insufficient comparisons) . . . . .                                            | 53        |
| <b>Supplemental figure 5Z: Ratio of marginal vitamin A status (RBP &lt; 1.05 µmol/L) prevalence ratios</b>            | <b>54</b> |
| 5Z1: By study context effect modifiers (insufficient comparisons) . . . . .                                           | 54        |
| 5Z2: By study design effect modifiers (insufficient comparisons) . . . . .                                            | 55        |
| <b>Supplemental figure 5AA: Difference in marginal vitamin A status (RBP &lt; 1.05 µmol/L) prevalence differences</b> | <b>56</b> |
| 5AA1: By study context effect modifiers (insufficient comparisons) . . . . .                                          | 56        |
| 5AA2: By study design effect modifiers (insufficient comparisons) . . . . .                                           | 57        |

These figures show the pooled estimates of effect modification by different sensitivity analyses. For continuous outcomes, the intervention effect is measured by the difference in mean of the LNS group minus control. For log transformed continuous outcomes, the intervention effect is measured by the ratio of geometric means, the effect estimate is the geometric mean in the LNS group divided by the geometric mean in the control group. For dichotomous outcomes analyzed via prevalence ratios, the effect estimate is the prevalence in the LNS group divided by the prevalence in the control group. For dichotomous outcomes analyzed via prevalence differences, the effect estimate is the prevalence in the LNS group minus the prevalence in the control group. The labels on the left y-axis indicate which outcome is assessed. The different columns correspond to sensitivity analyses in which intervention group categorization differs. All-trial analysis includes all trials; Child-LNS-only excludes trial arms that provided both maternal and child LNS; Multi-component analysis separates comparisons within trials that included multi-component interventions, so that the SQ-LNS vs. no SQ-LNS comparisons were conducted separately between pairs of arms that included the same non-nutrition components (e.g. SQ-LNS+WASH vs. WASH; SQ-LNS vs. Control); Passive arms excluded analysis excludes passive control arms. Depending on the sensitivity analysis, there may not have been enough comparisons available to generate a pooled estimate.

sTfR, soluble transferrin receptor; ZPP, zinc protoporphyrin; RBP, retinol binding protein.



# Supplemental figure 5A: Difference in mean differences in hemoglobin concentration

5A1: By study context effect modifiers

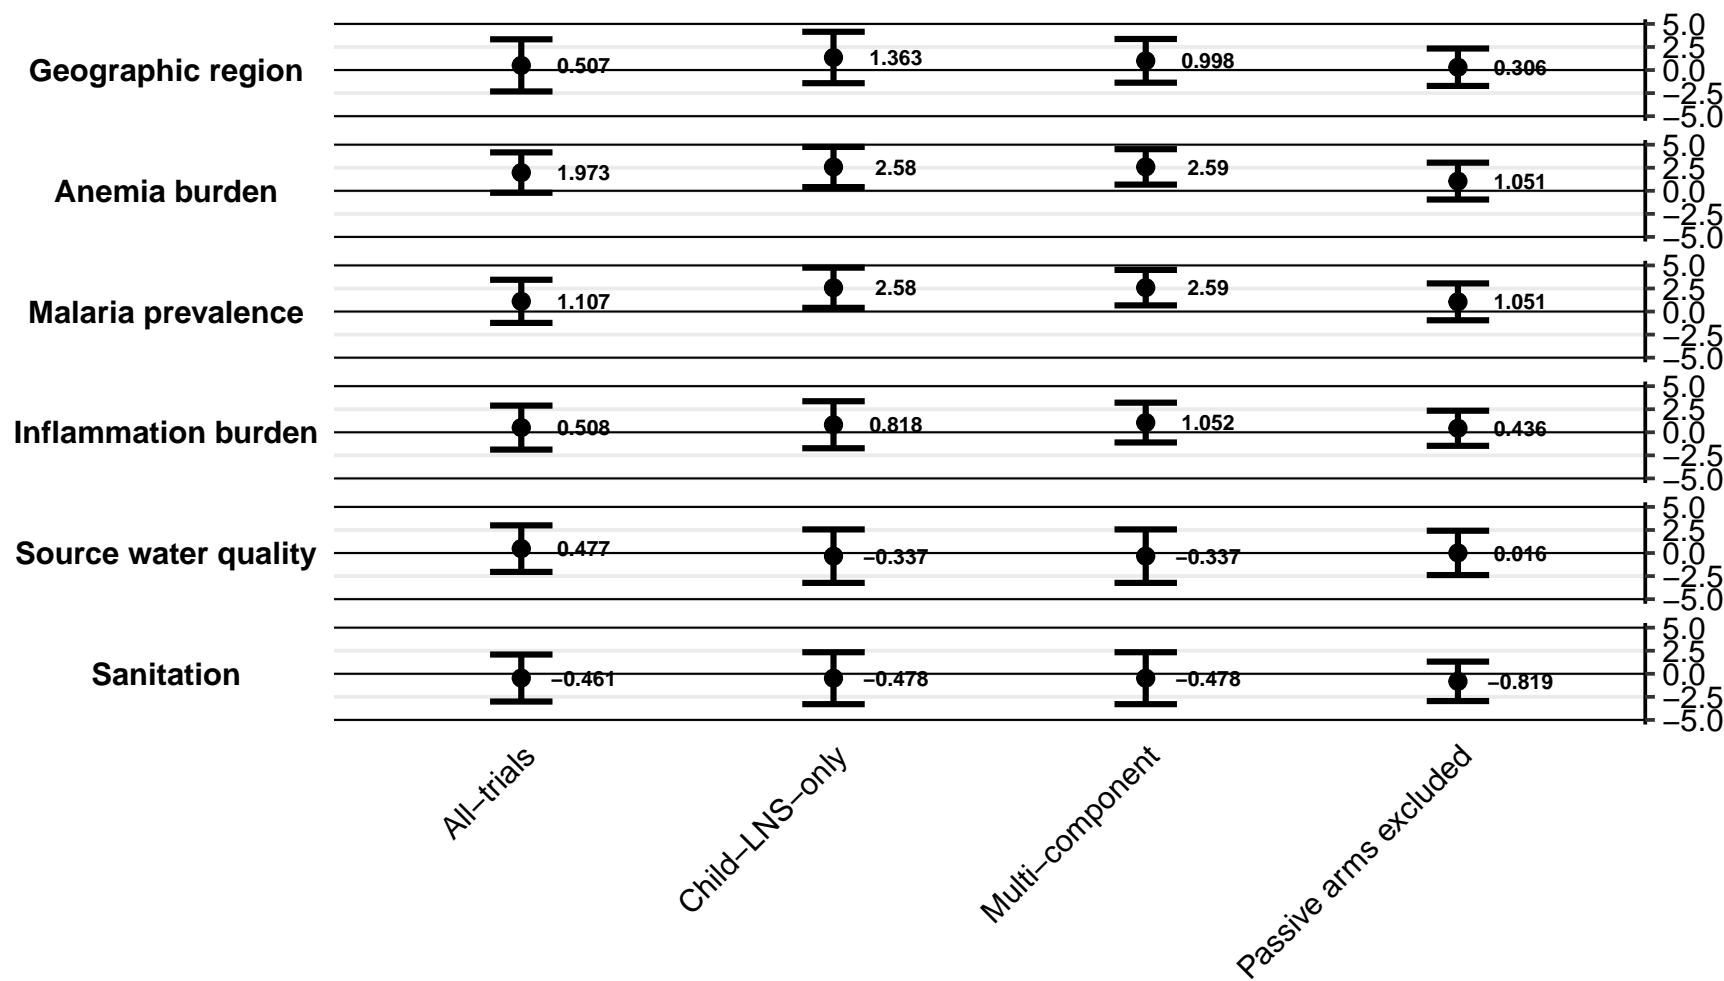

Supplemental figure 5A: Difference in mean differences in hemoglobin concentration

5A2: By study design effect modifiers

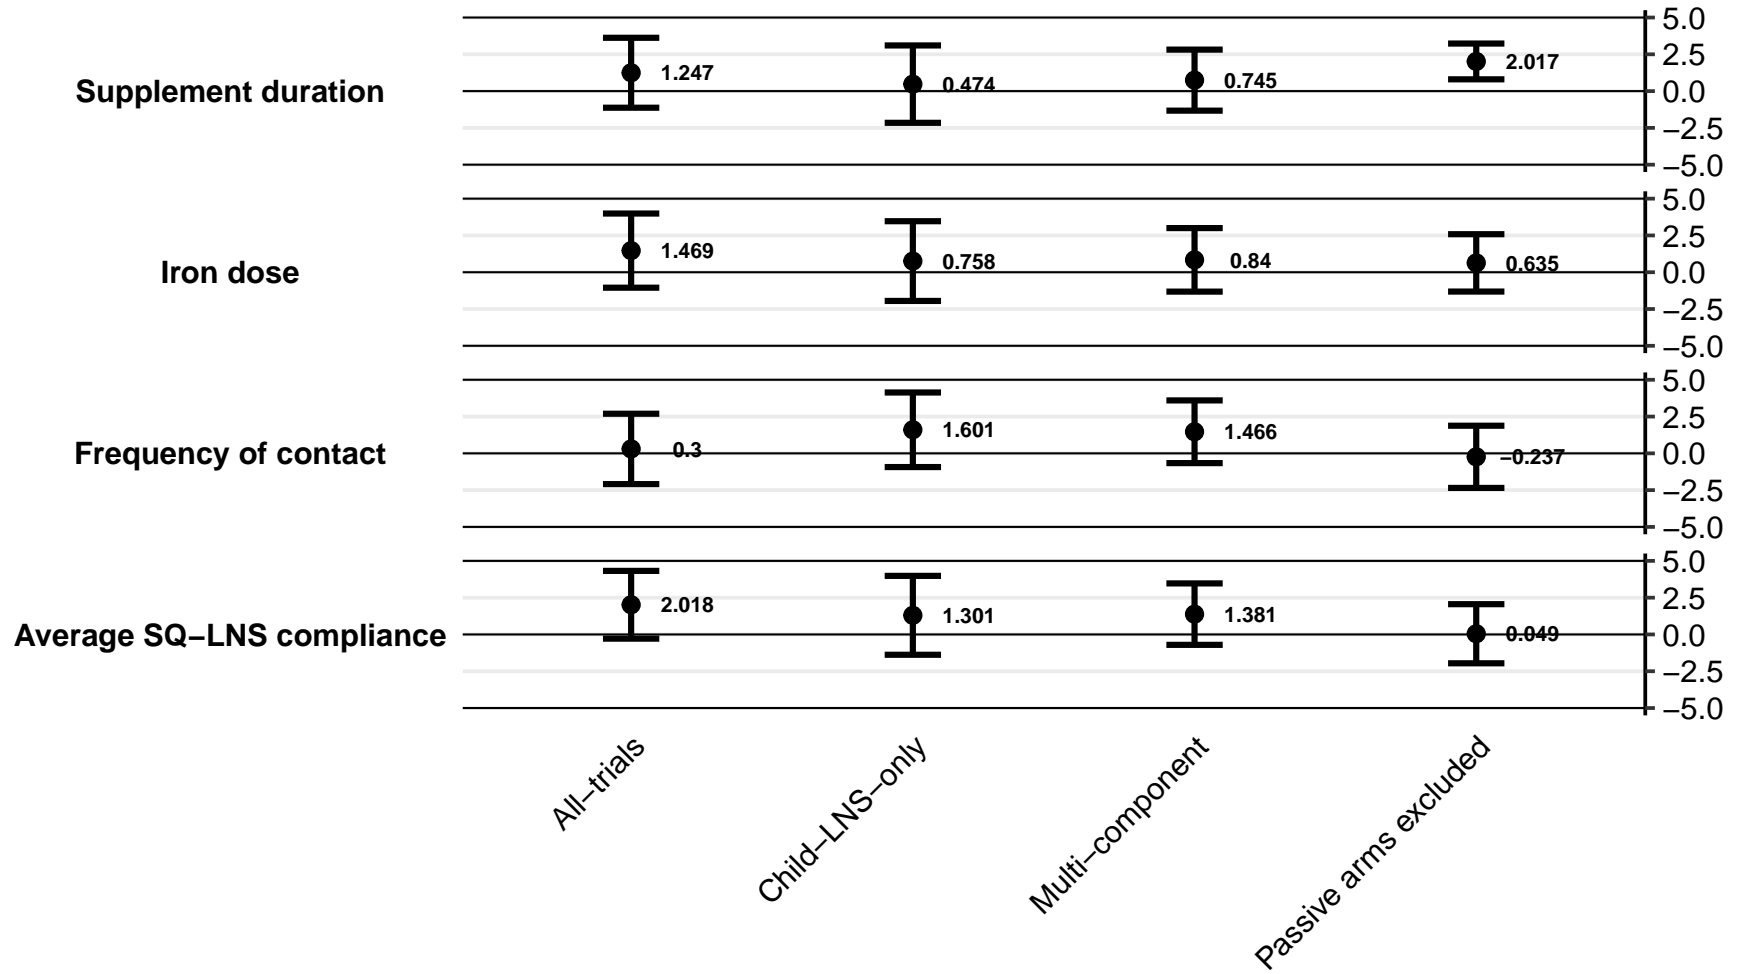

## Supplemental figure 5B: Ratio of anemia prevalence ratios

5B1: By study context effect modifiers

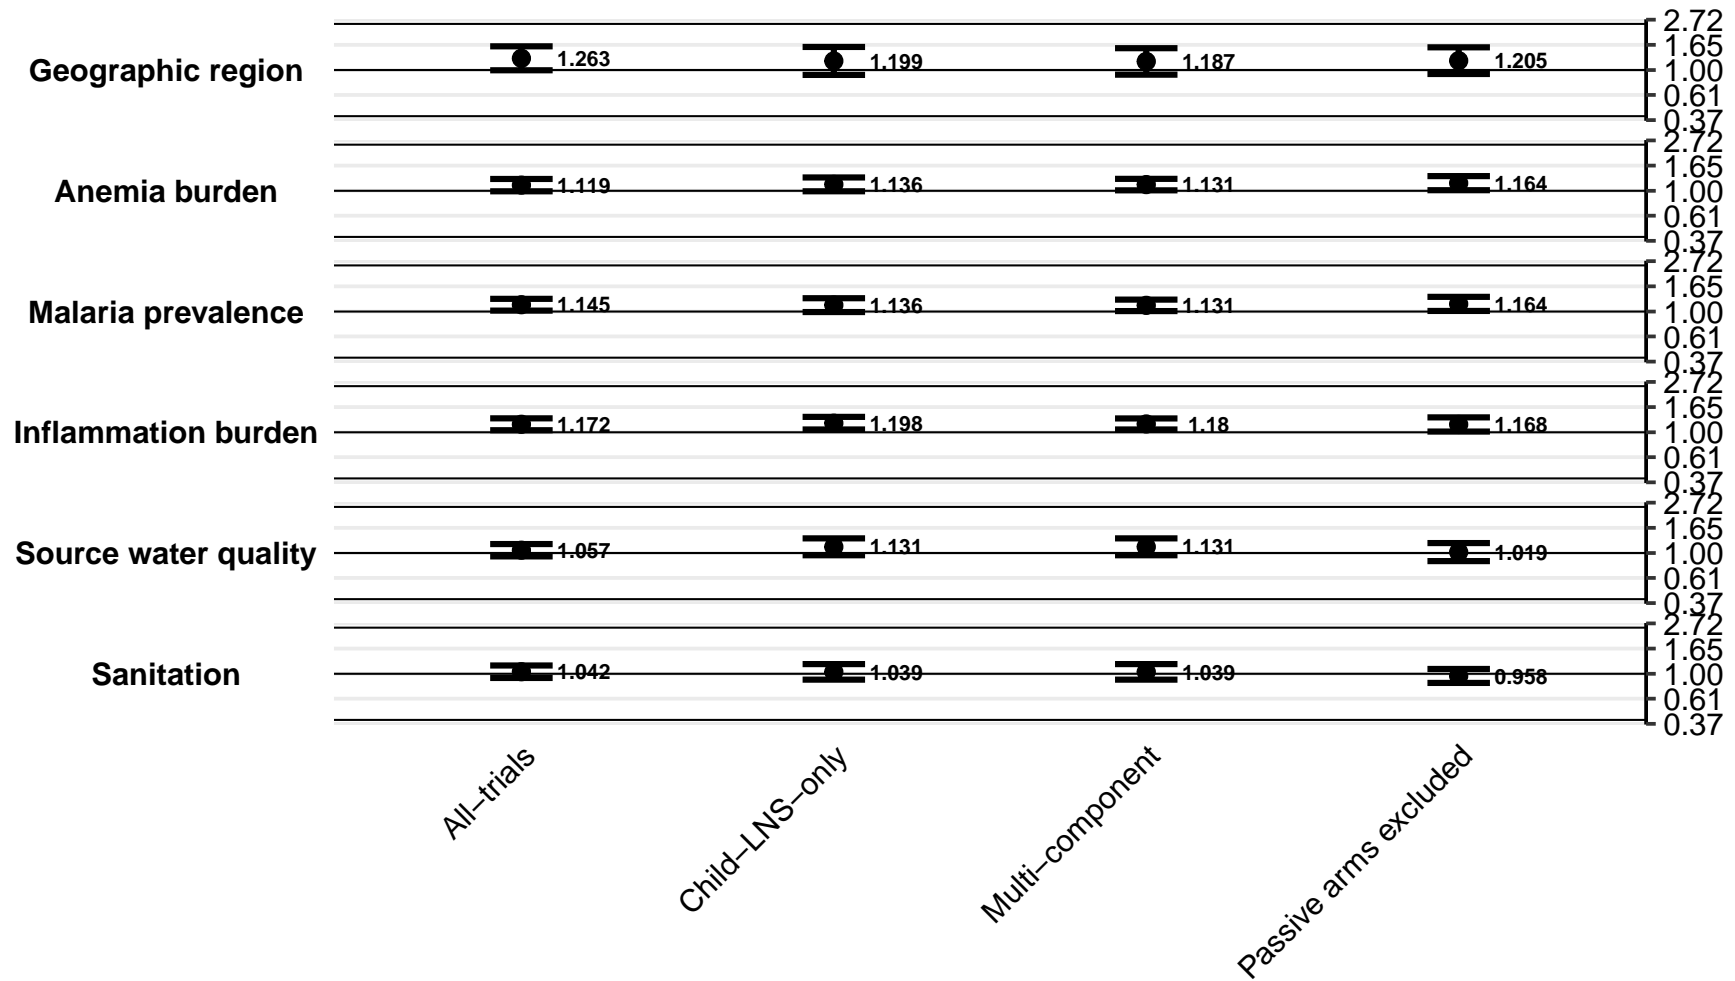

Supplemental figure 5B: Ratio of anemia prevalence ratios

5B2: By study design effect modifiers

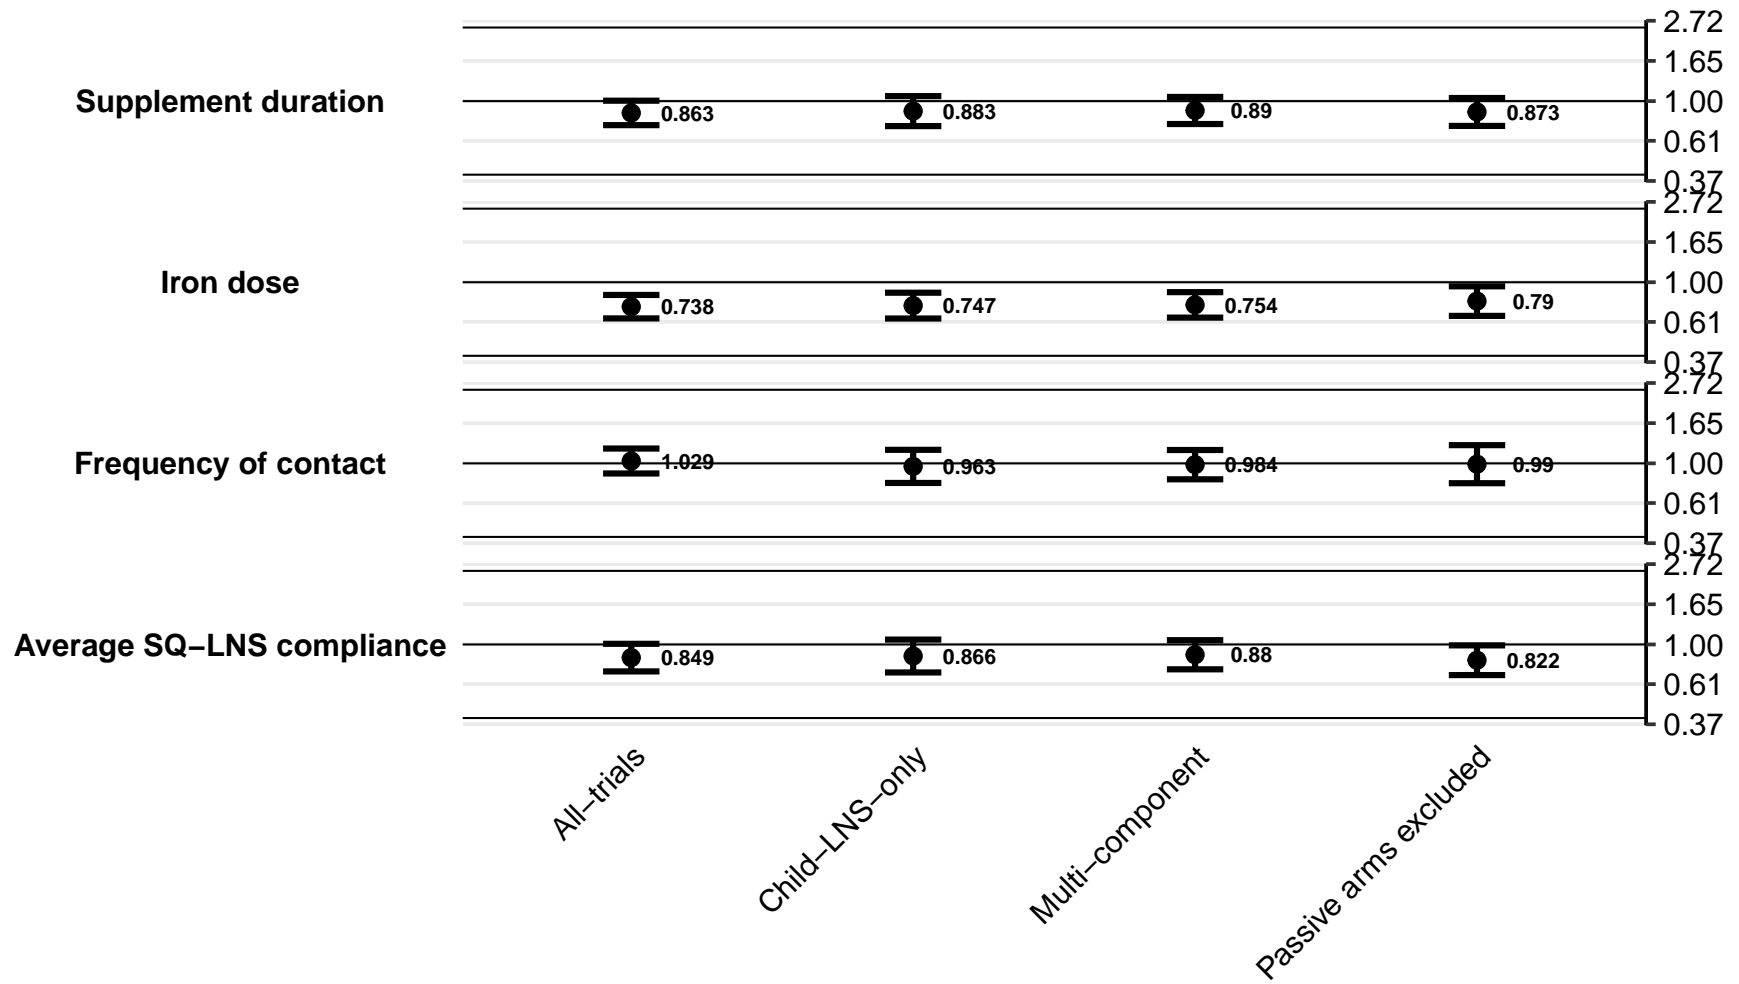

# Supplemental figure 5C: Difference in anemia prevalence differences

5C1: By study context effect modifiers

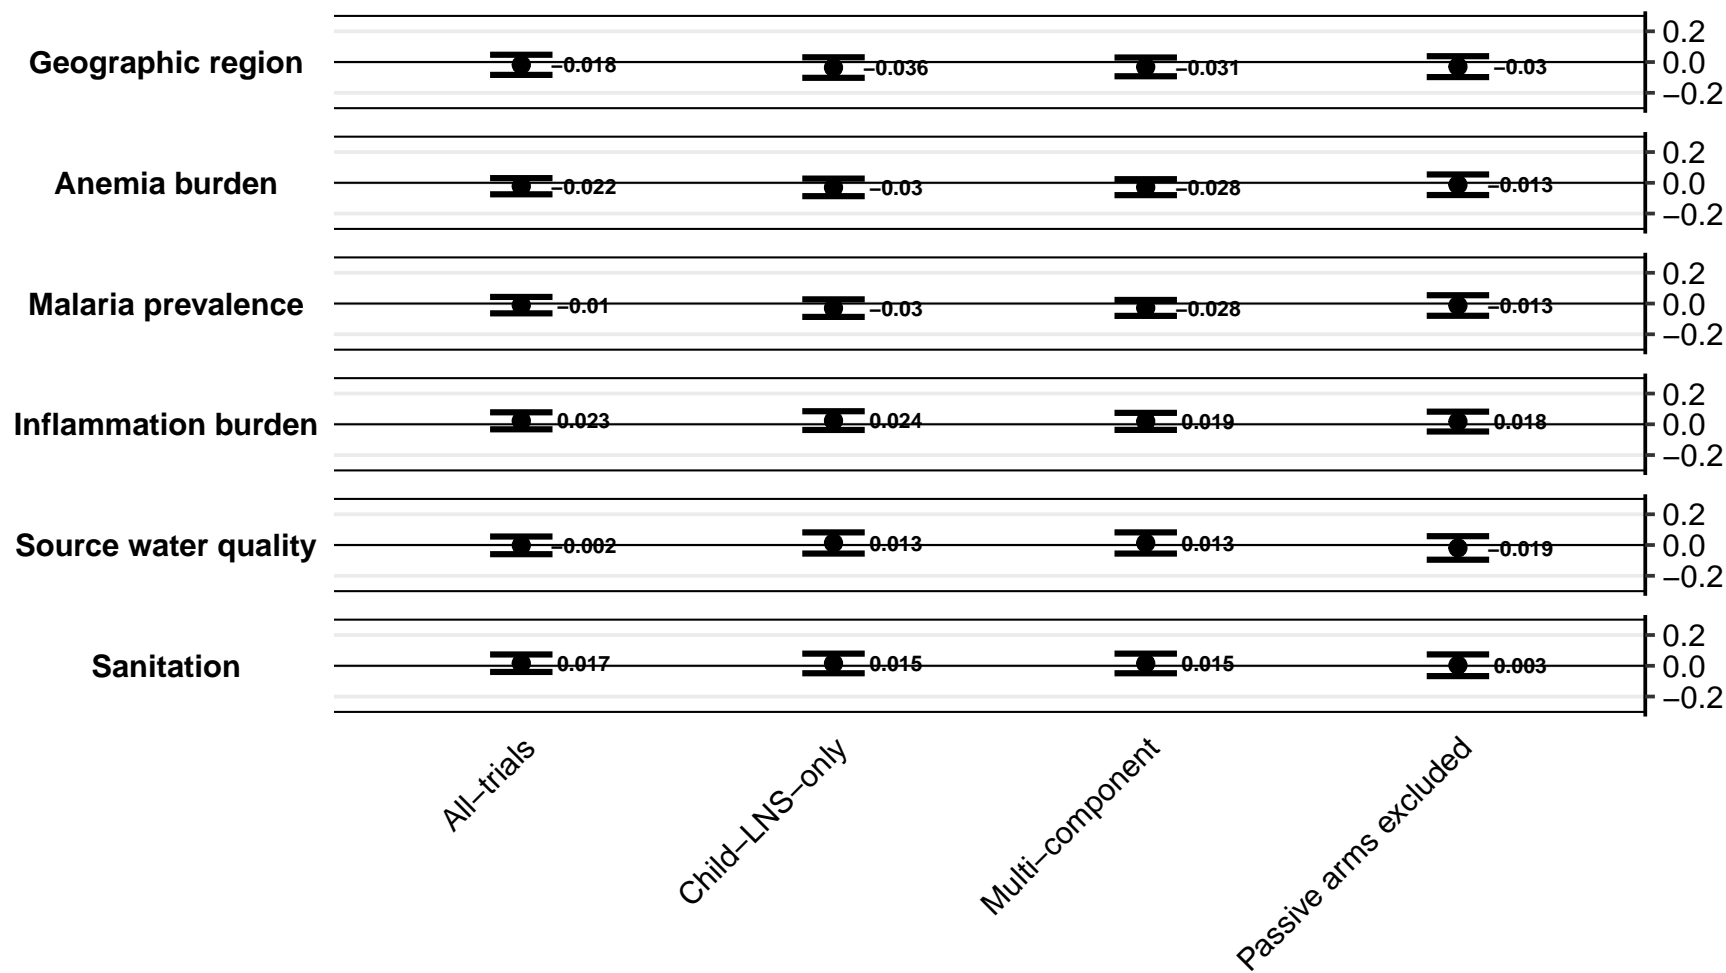

Supplemental figure 5C: Difference in anemia prevalence differences

5C2: By study design effect modifiers

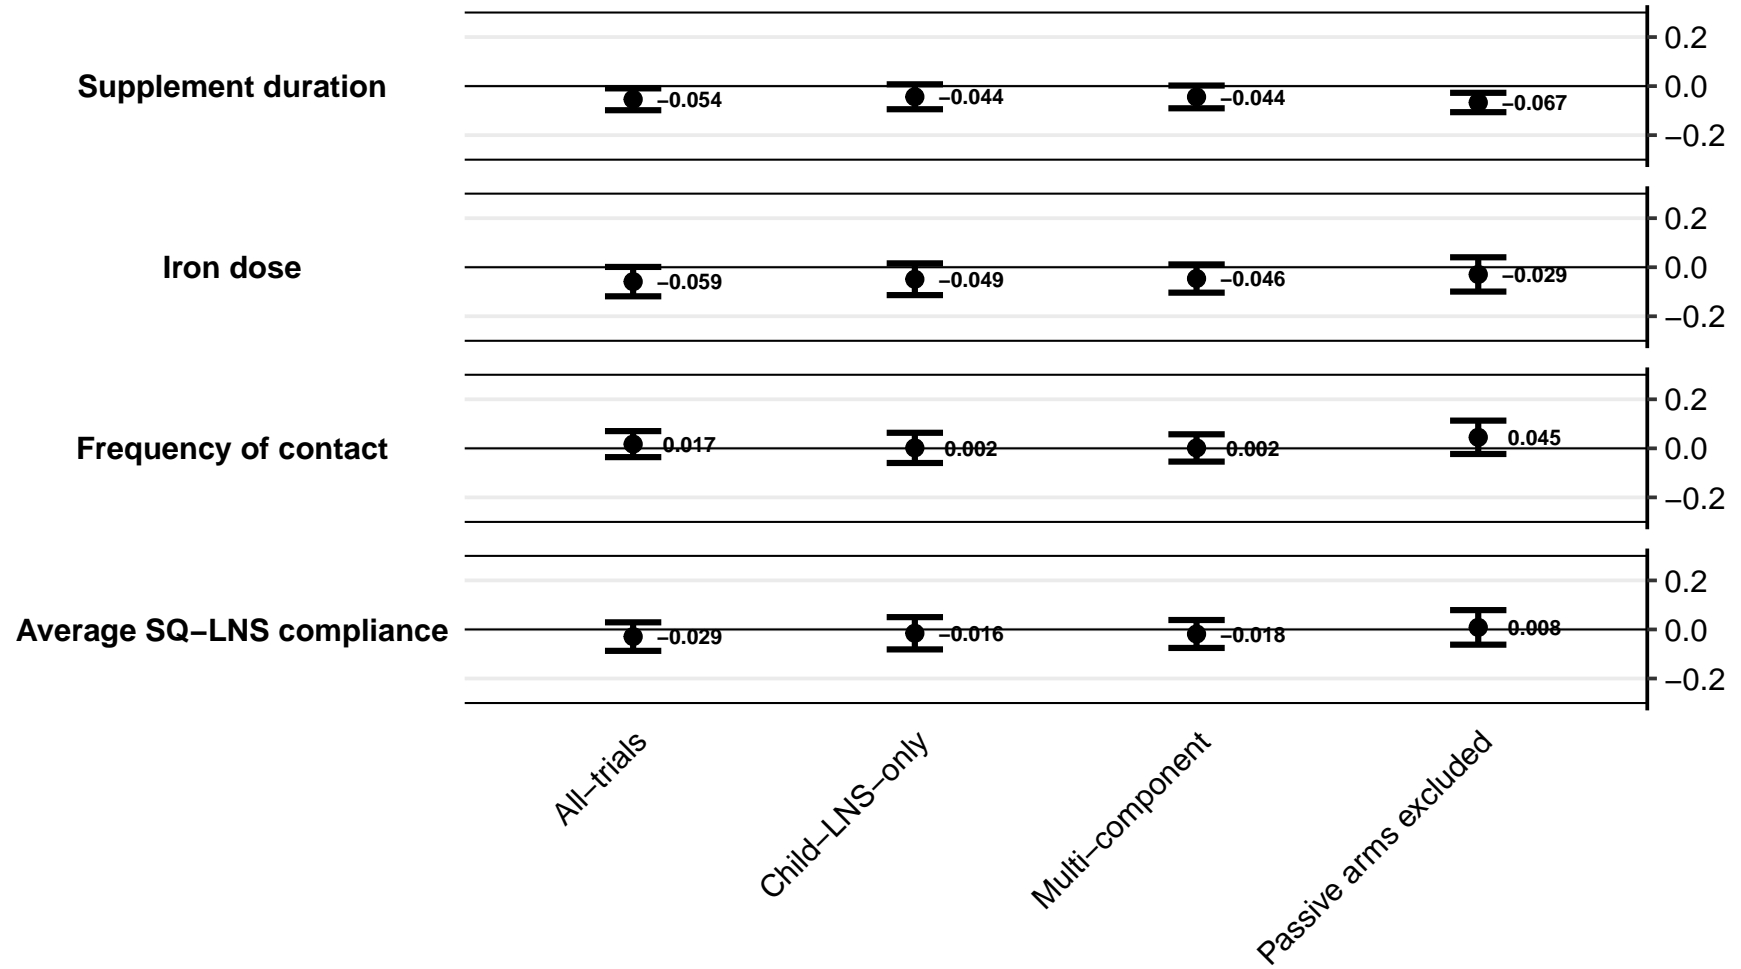

# Supplemental figure 5D: Ratio of moderate-to-severe anemia prevalence ratios

5D1: By study context effect modifiers

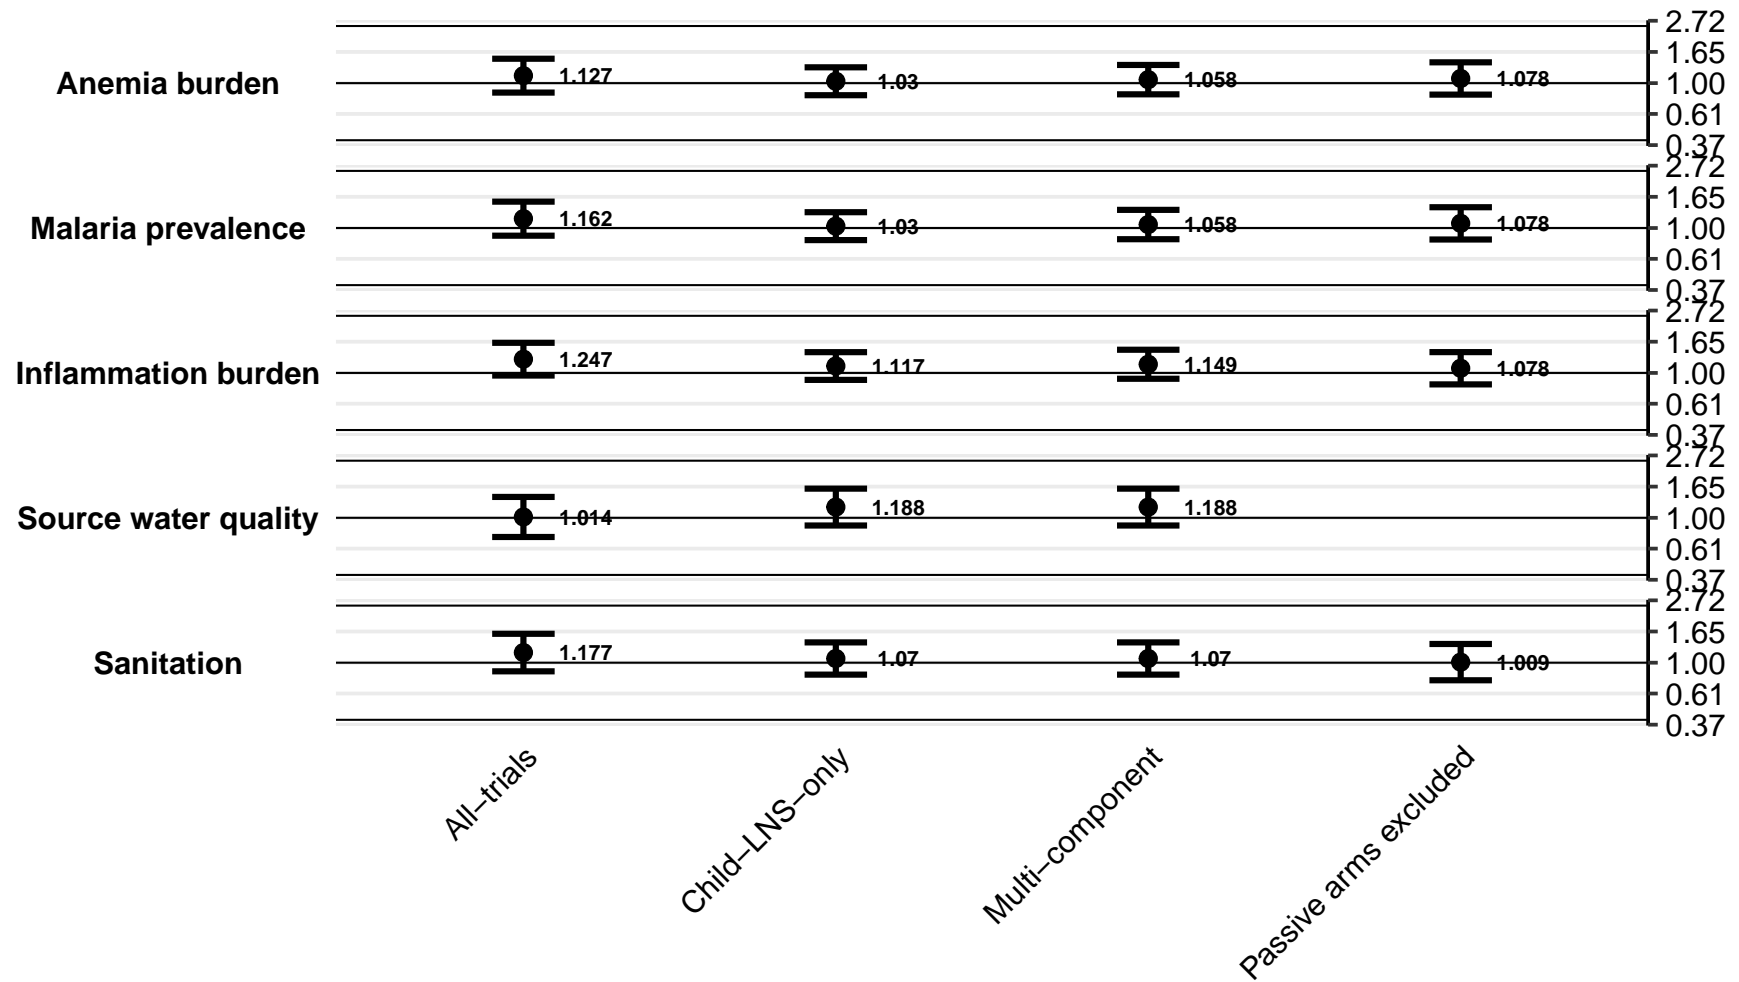

Supplemental figure 5D: Ratio of moderate-to-severe anemia prevalence ratios

5D2: By study design effect modifiers

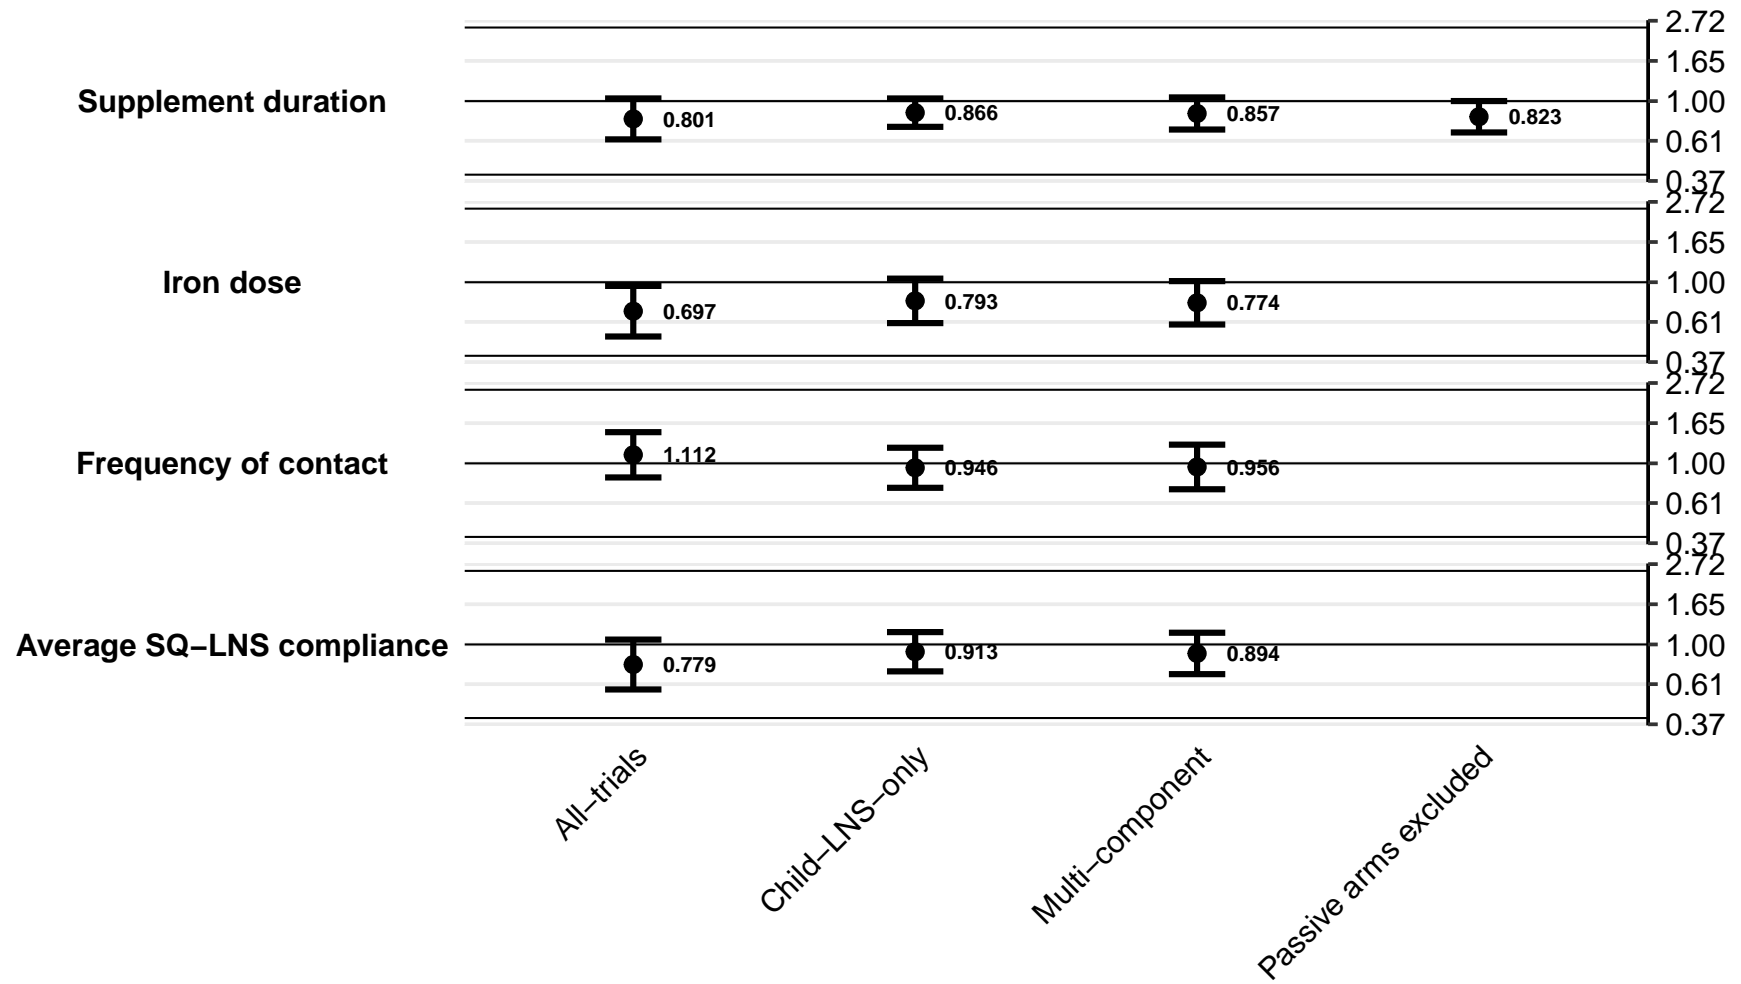



# Supplemental figure 5E: Difference in moderate-to-severe anemia prevalence differences

5E1: By study context effect modifiers

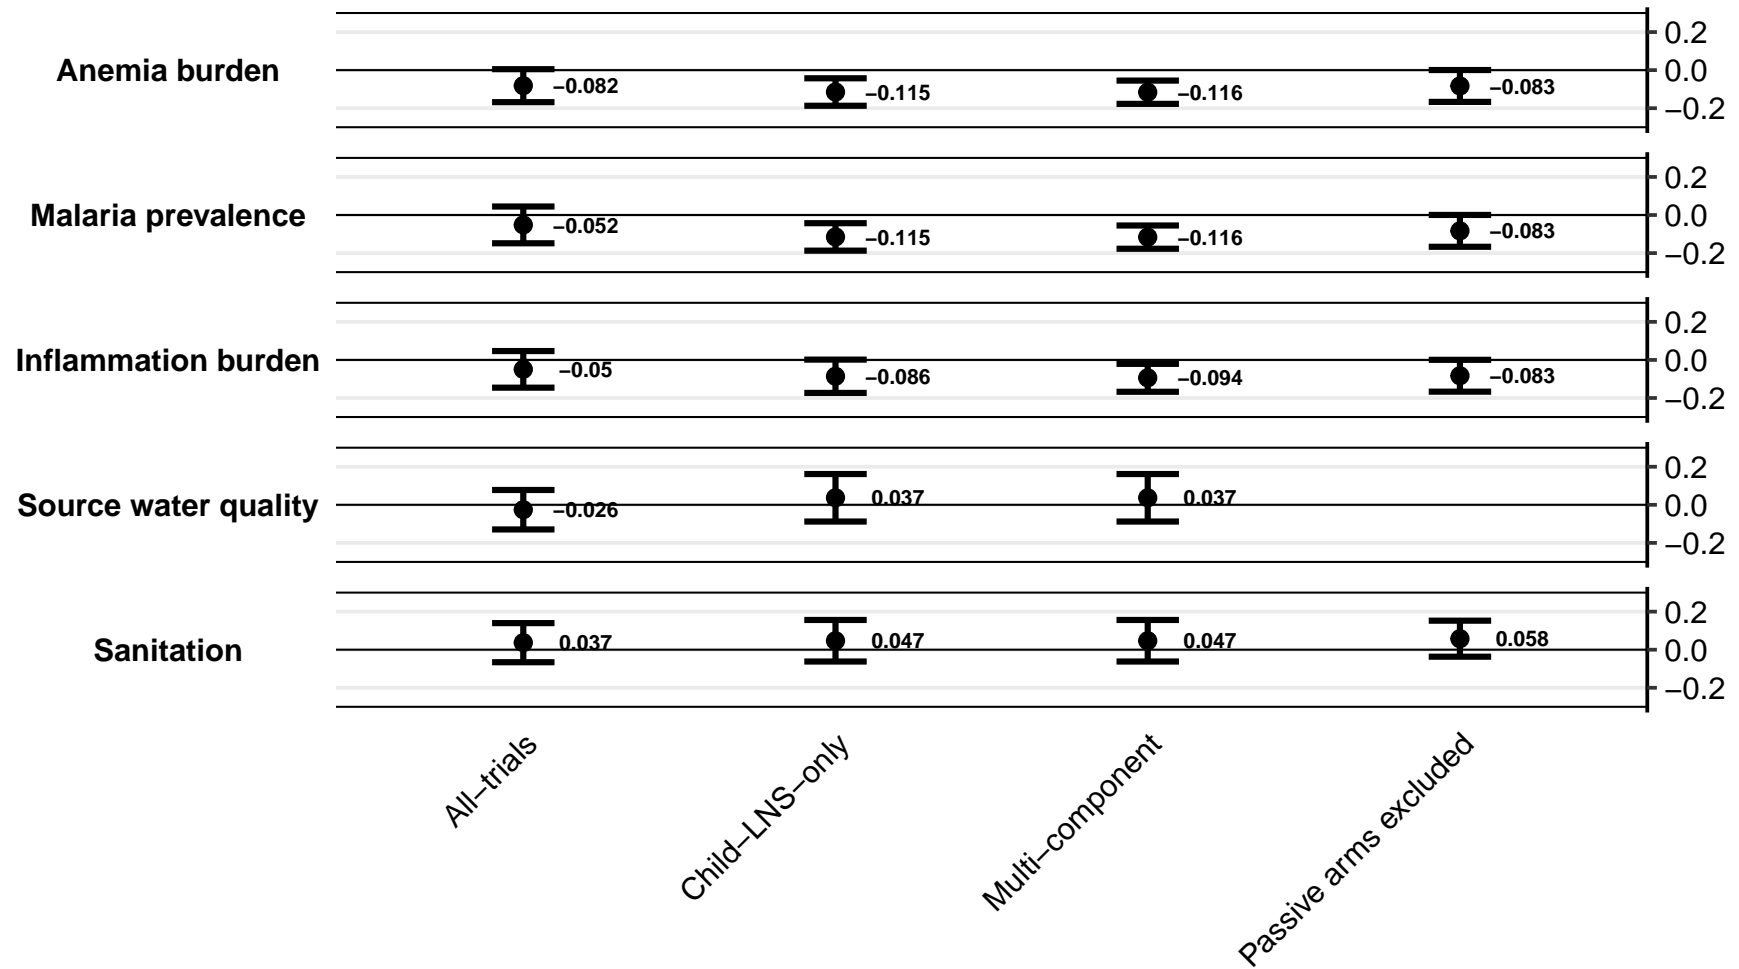

Supplemental figure 5E: Difference in moderate-to-severe anemia prevalence differences

5E2: By study design effect modifiers

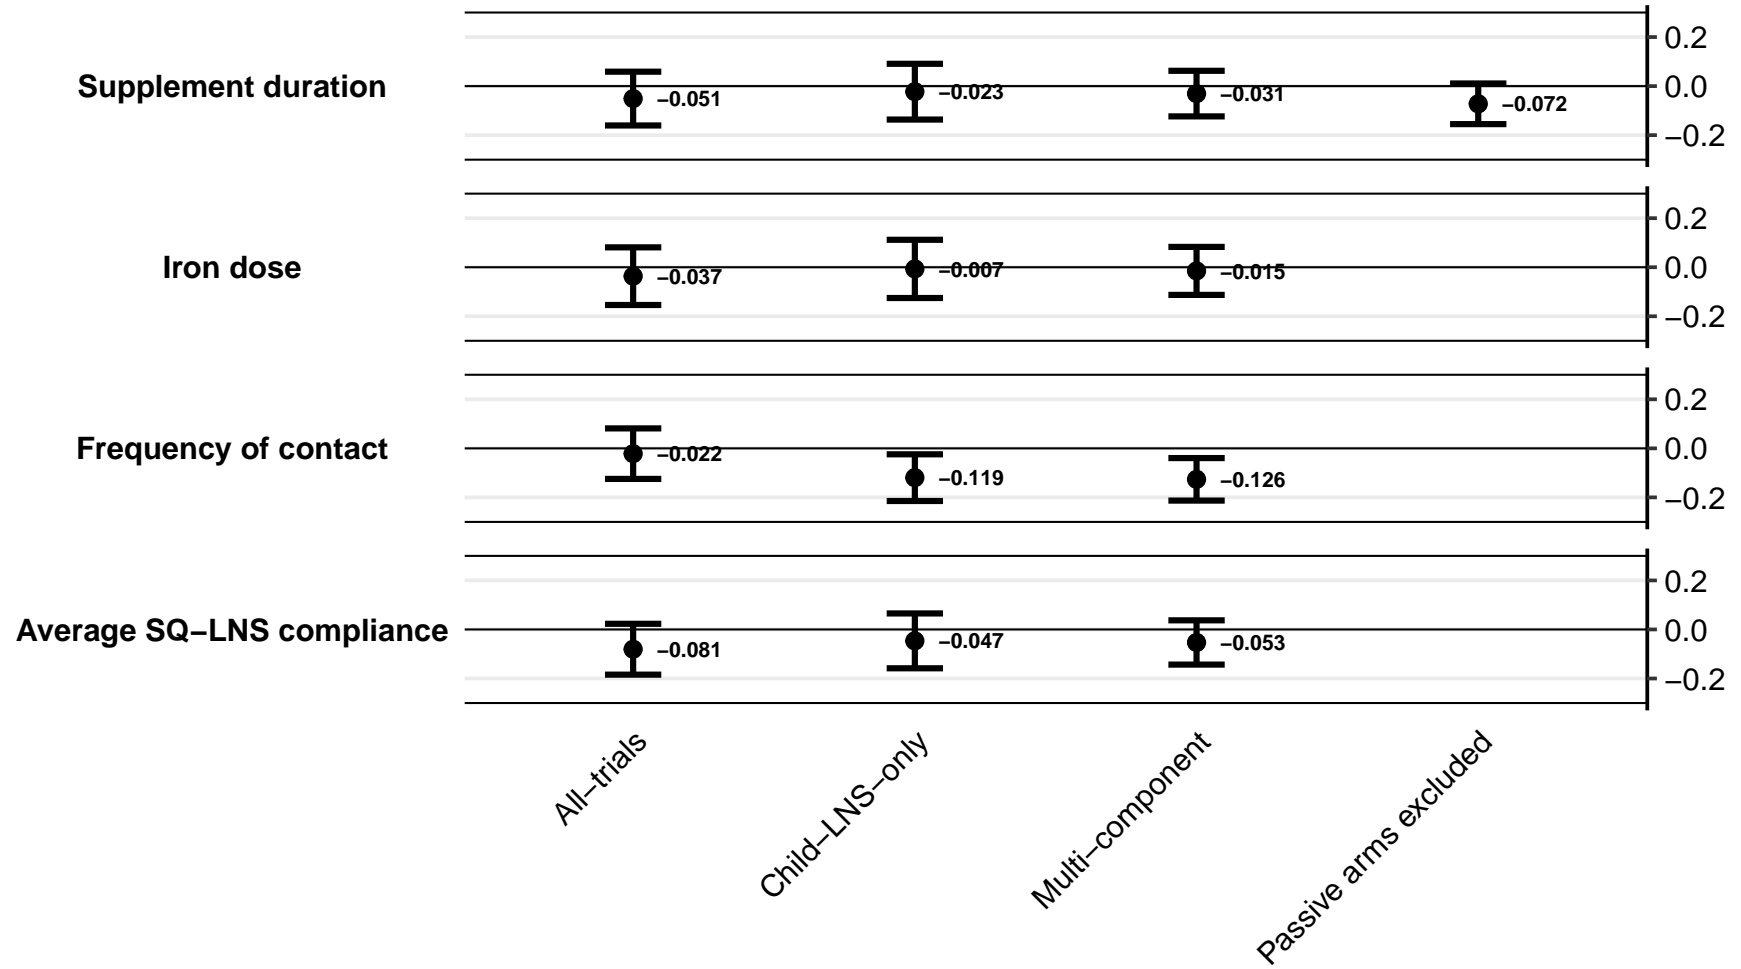

# Supplemental figure 5F: Ratio of geometric mean ratios of ferritin concentration

5F1: By study context effect modifiers

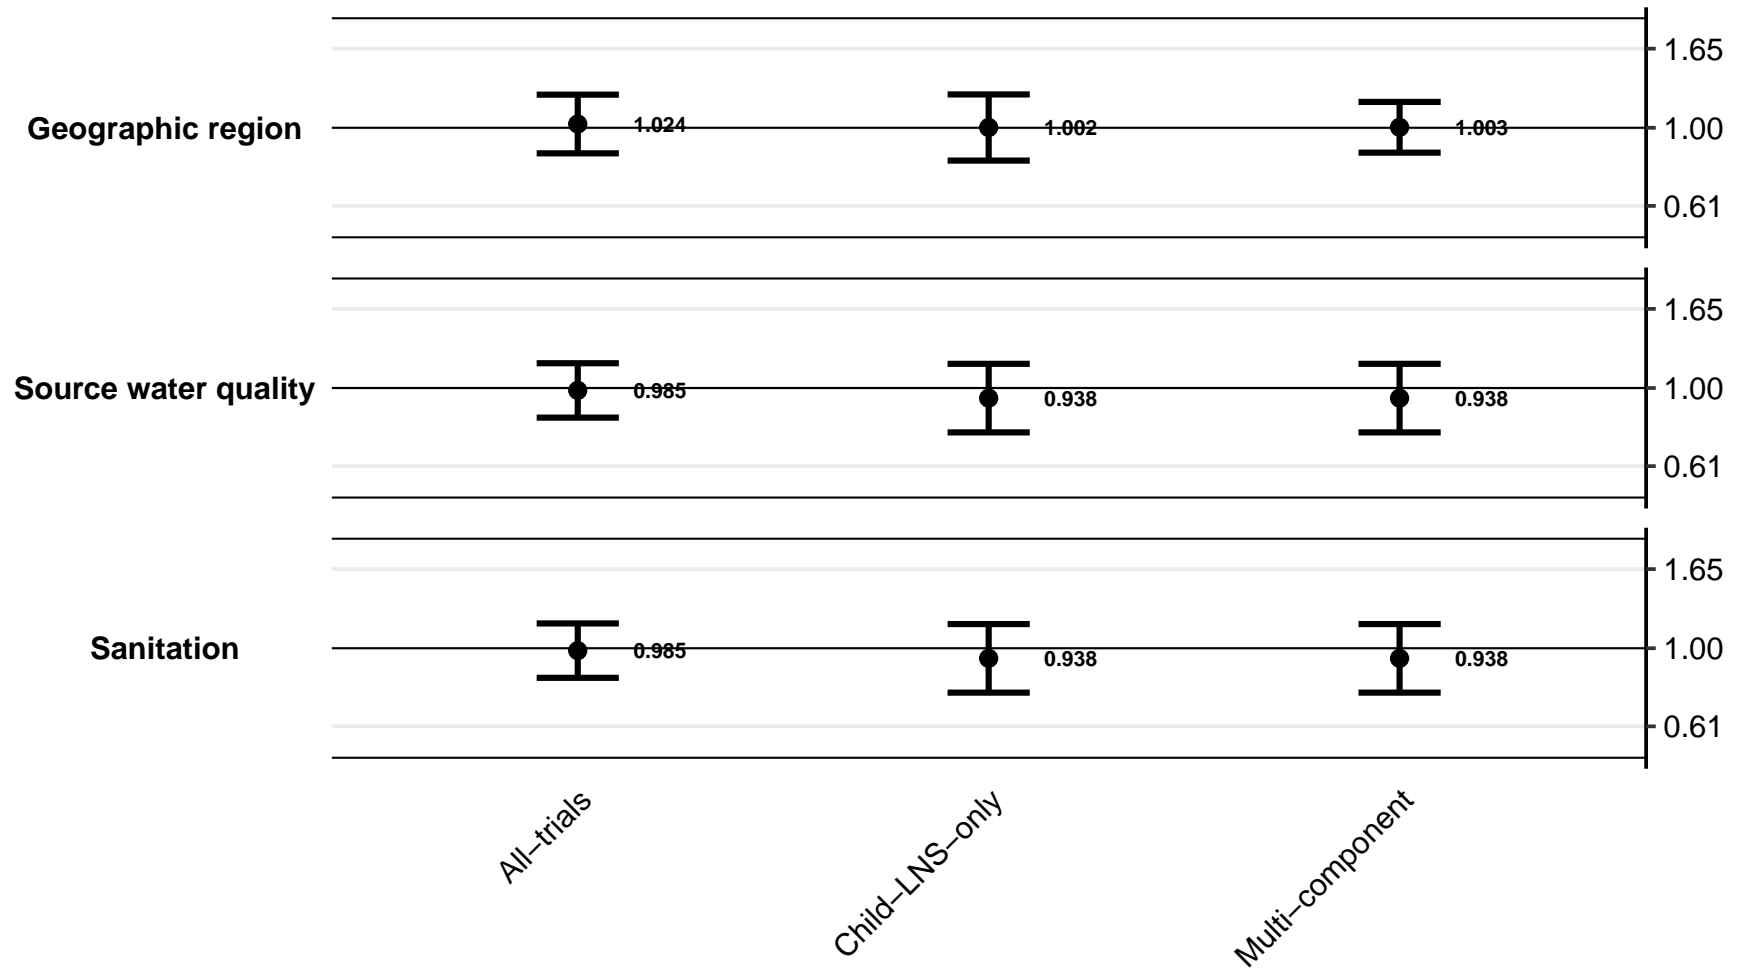

Supplemental figure 5F: Ratio of geometric mean ratios of ferritin concentration

5F2: By study design effect modifiers

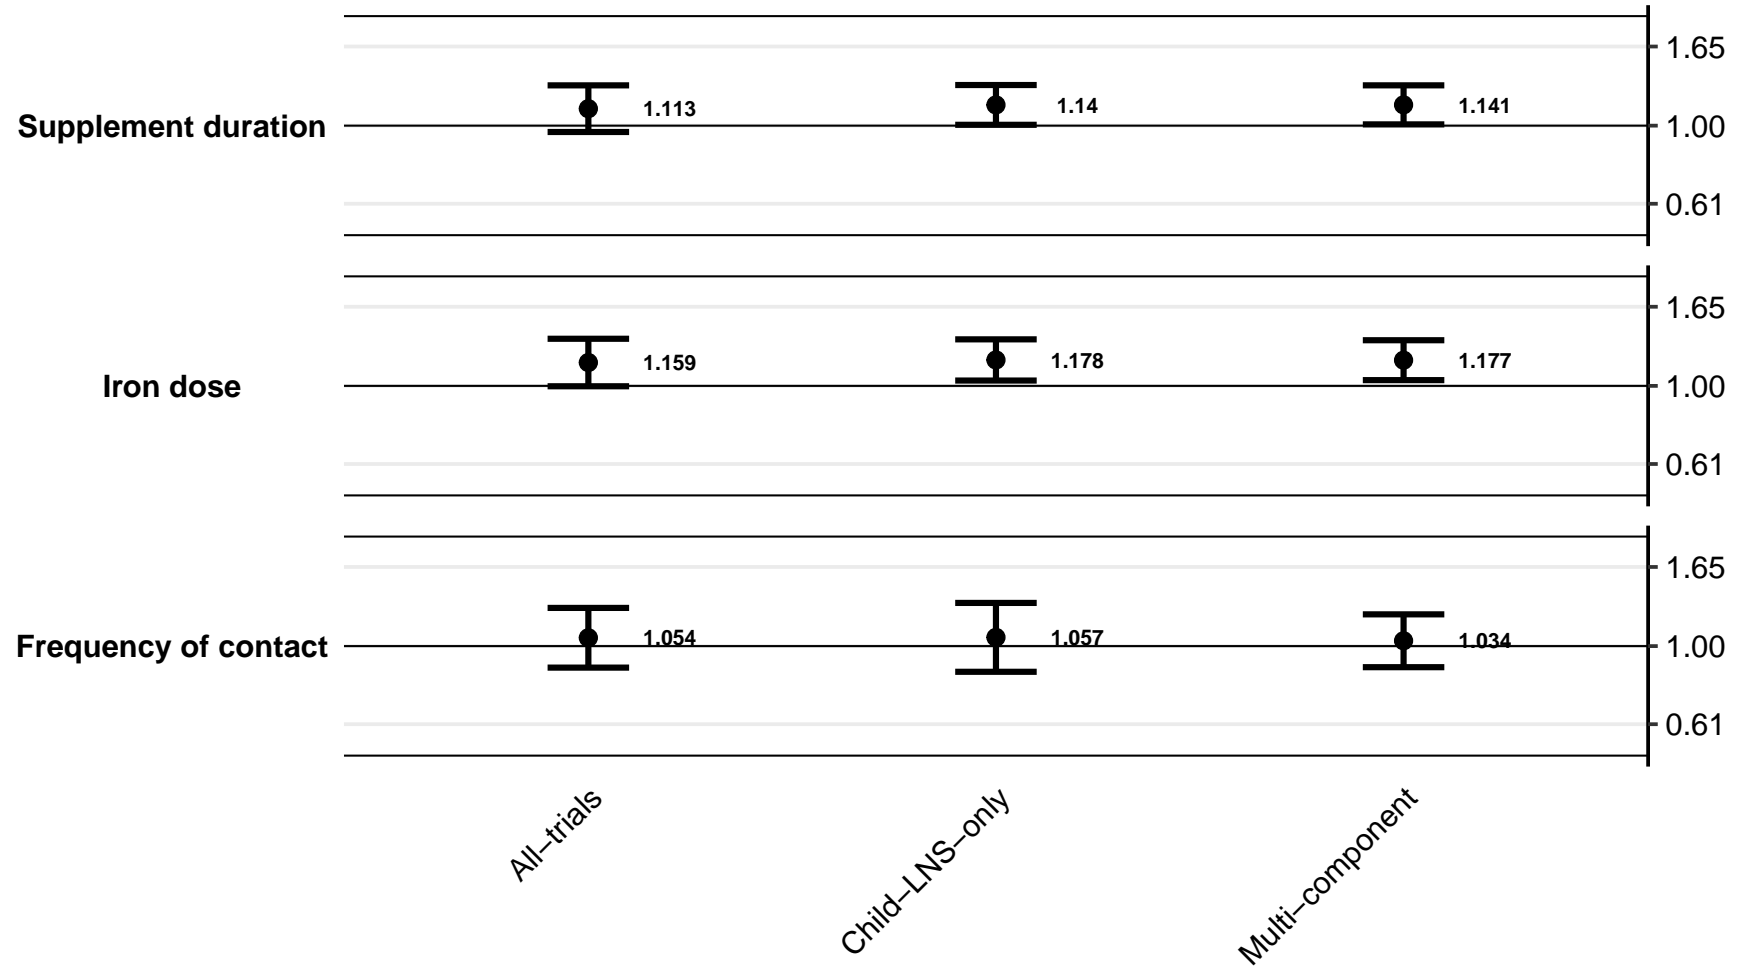

Supplemental figure 5G: Ratio of iron deficiency (ferritin < 12 µg/L) prevalence ratios  
5G1: By study context effect modifiers

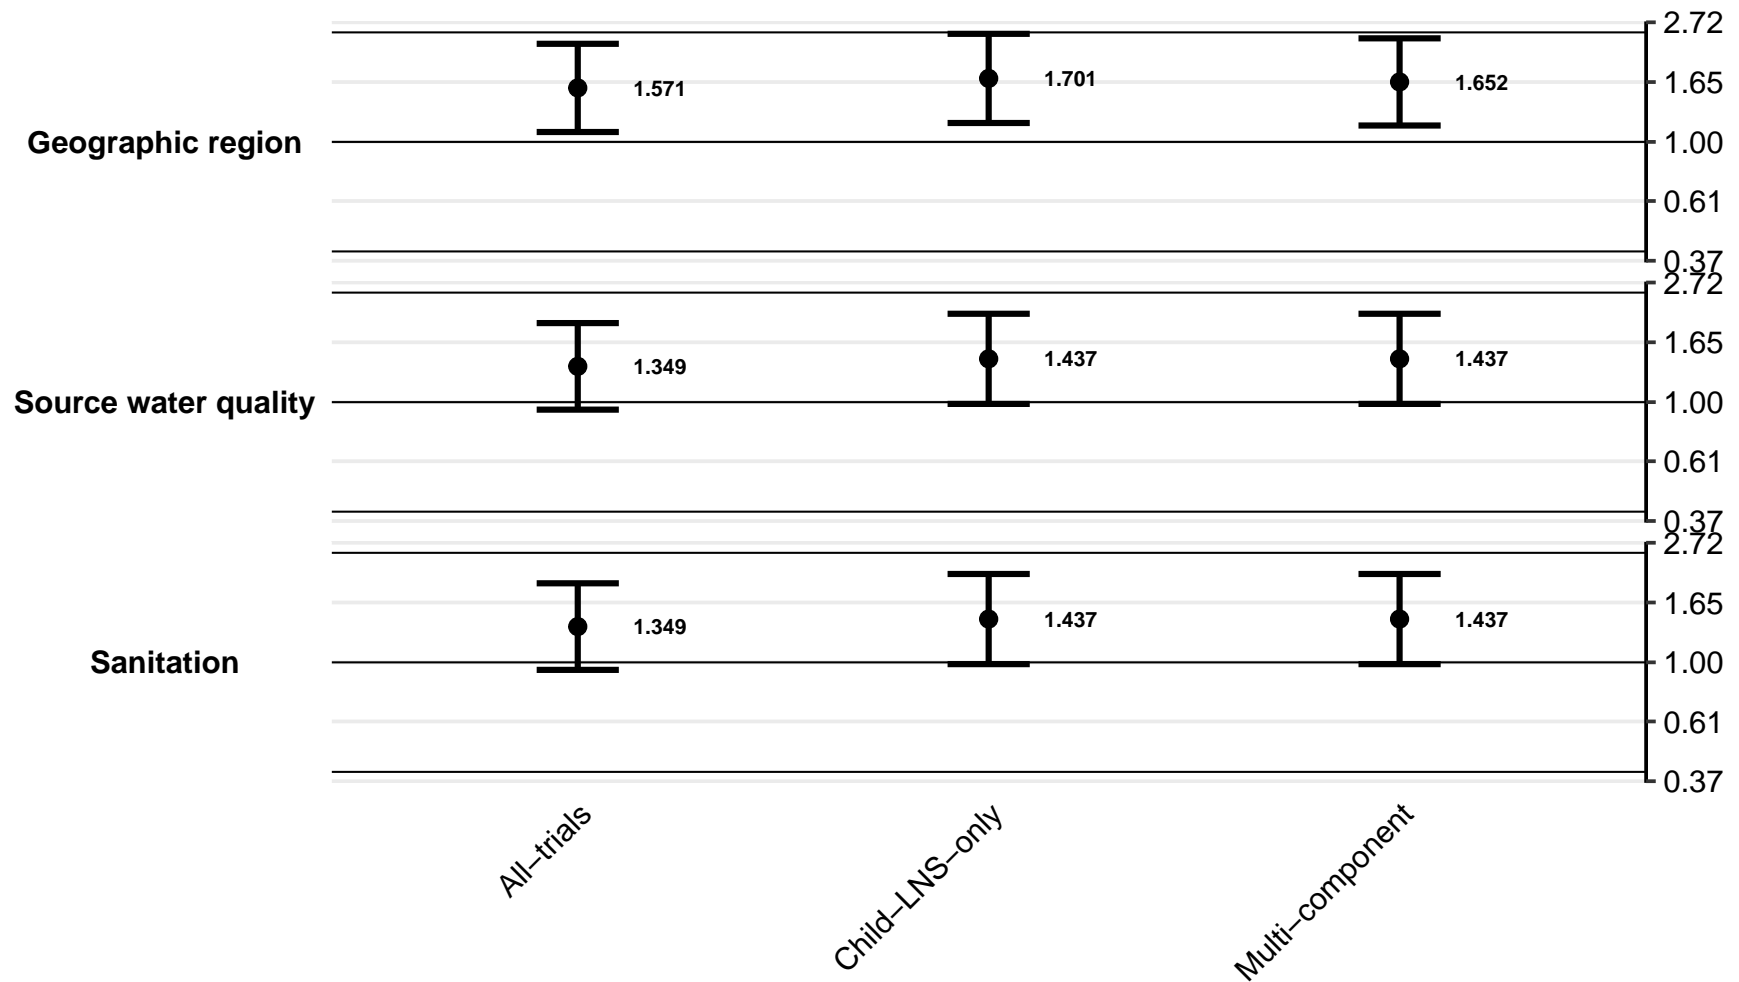

Supplemental figure 5G: Ratio of iron deficiency (ferritin < 12 µg/L) prevalence ratios

5G2: By study design effect modifiers

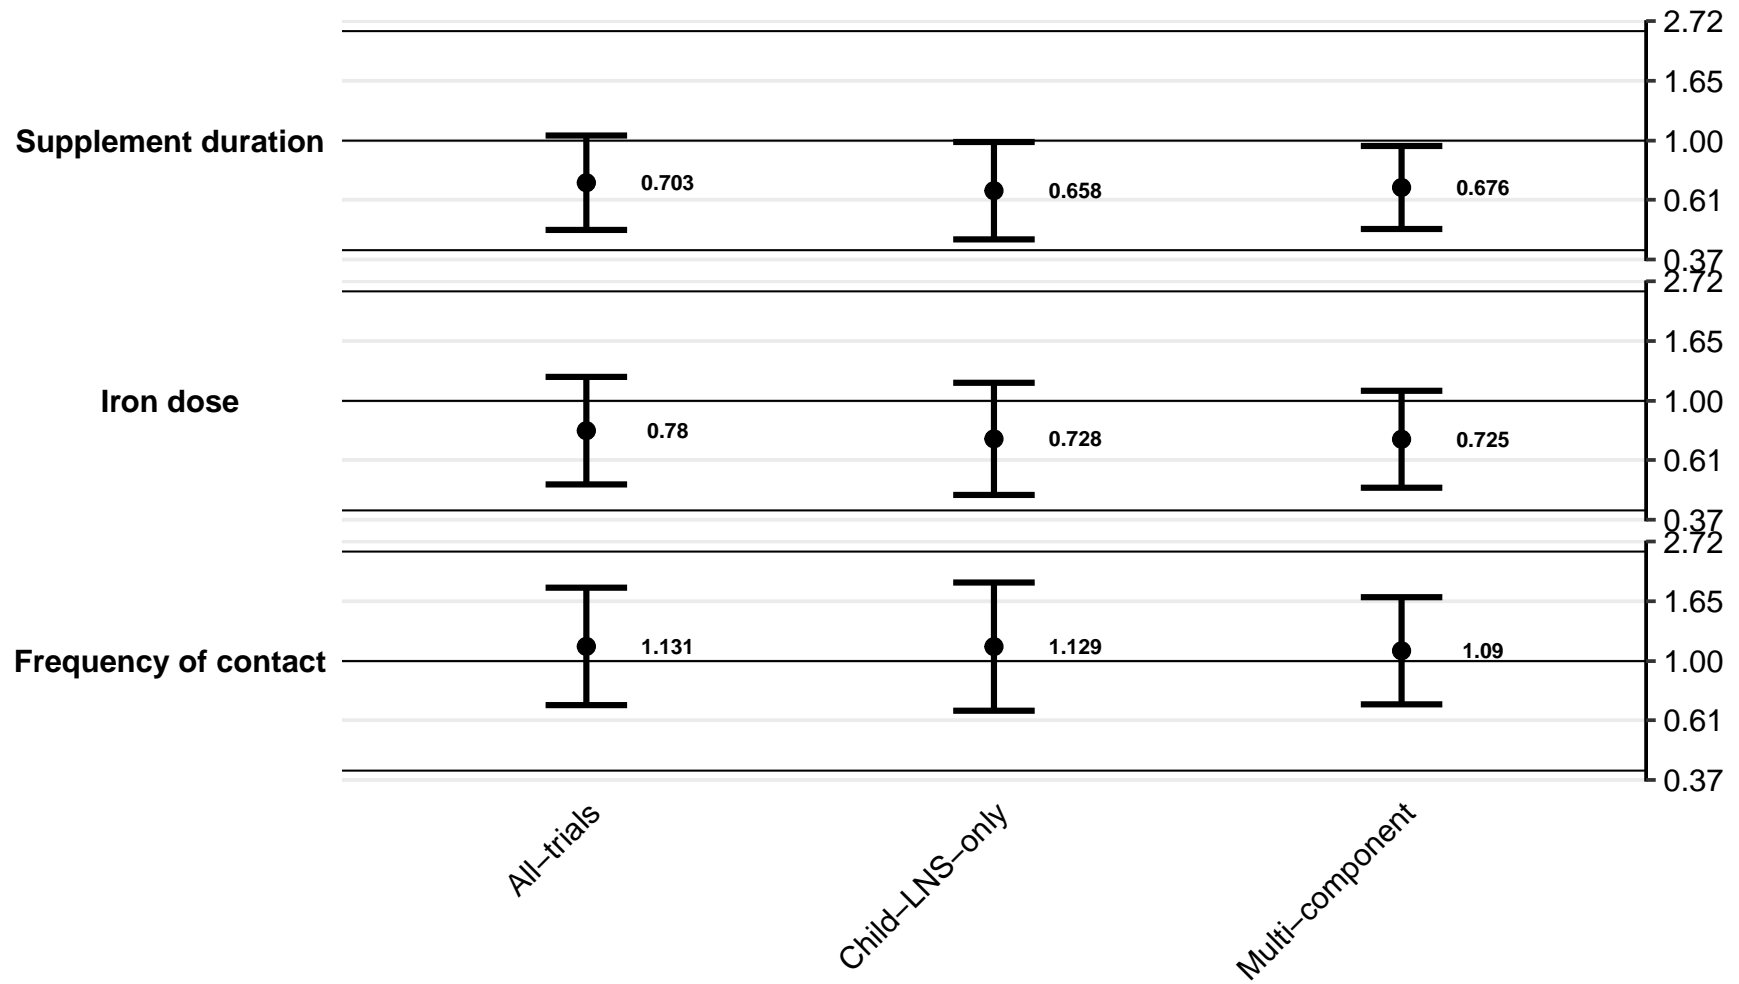

Supplemental figure 5H: Difference in iron deficiency (ferritin < 12 µg/L) prevalence differences  
5H1: By study context effect modifiers

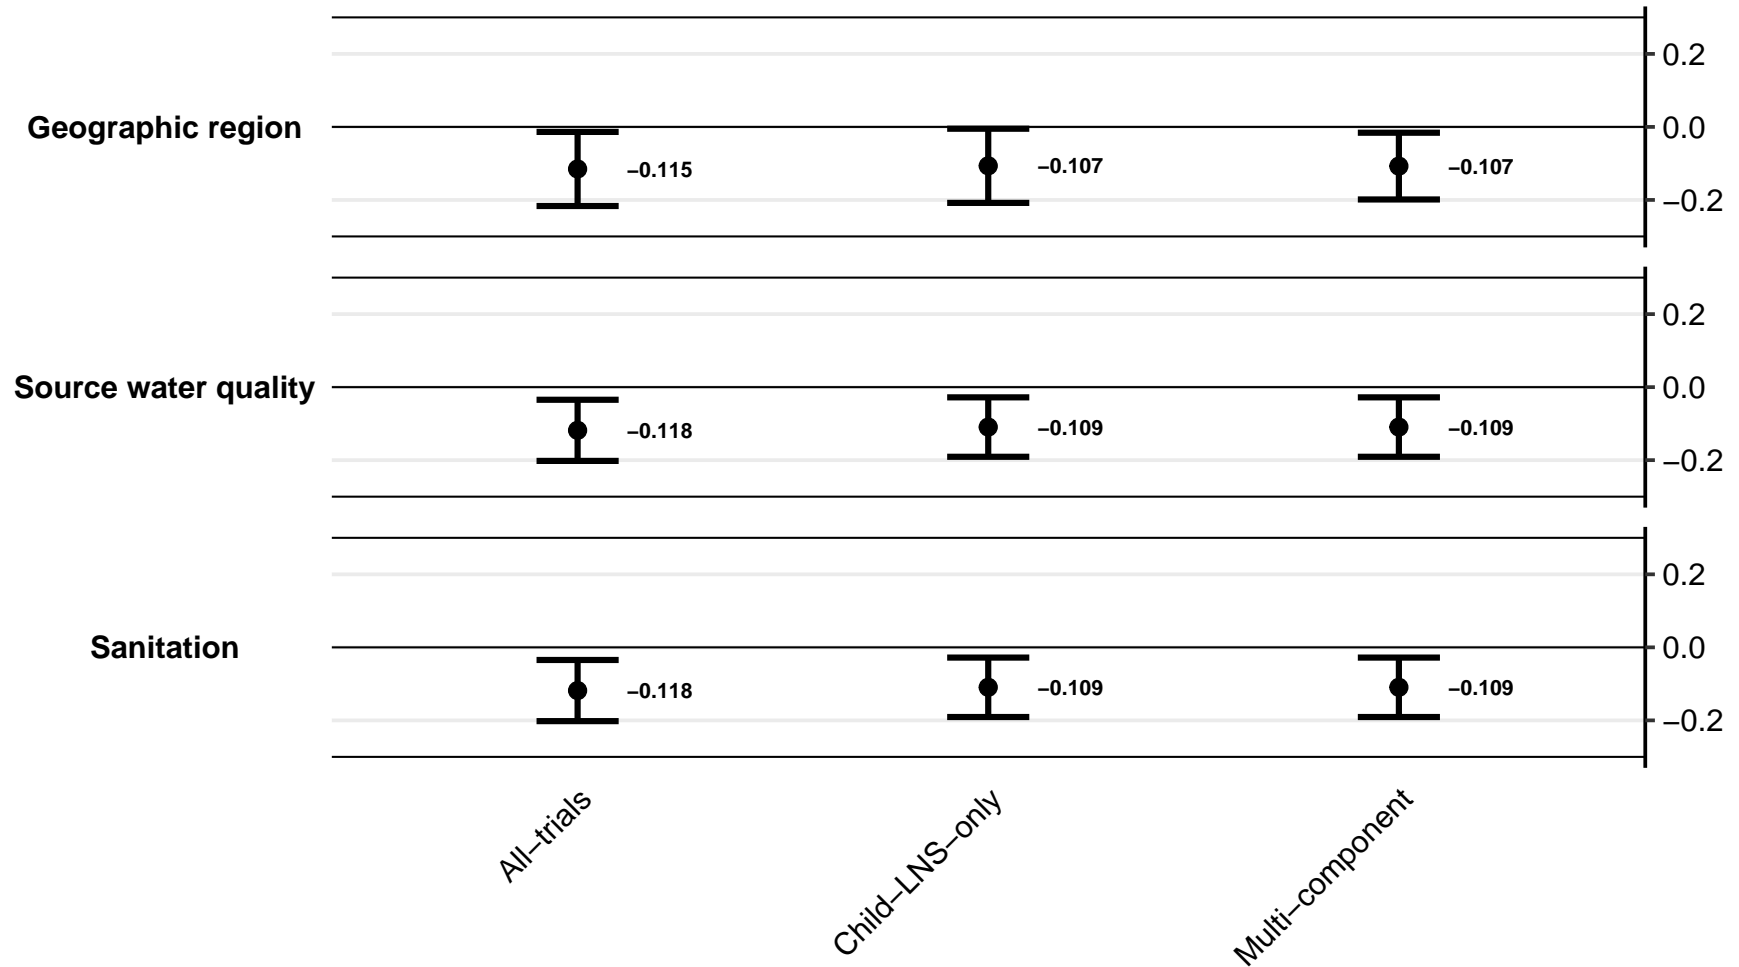

Supplemental figure 5H: Difference in iron deficiency (ferritin < 12 µg/L) prevalence differences

5H2: By study design effect modifiers

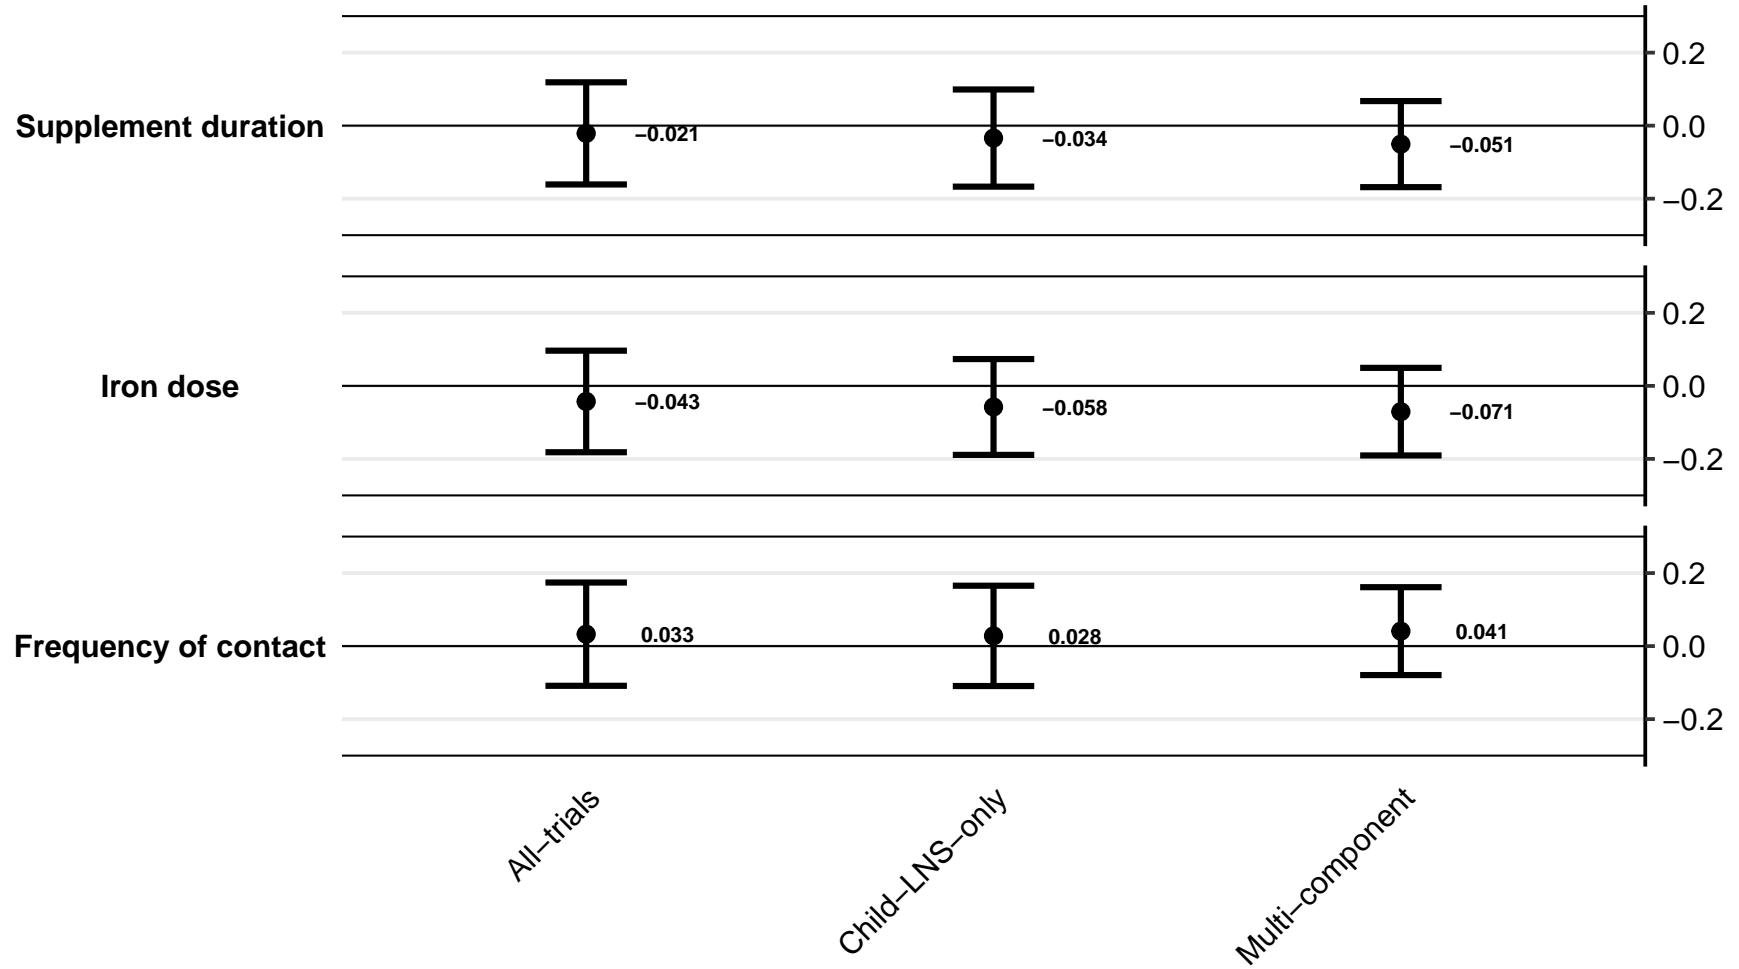



# Supplemental figure 5I: Ratio of iron deficiency anemia prevalence ratios

5I1: By study context effect modifiers

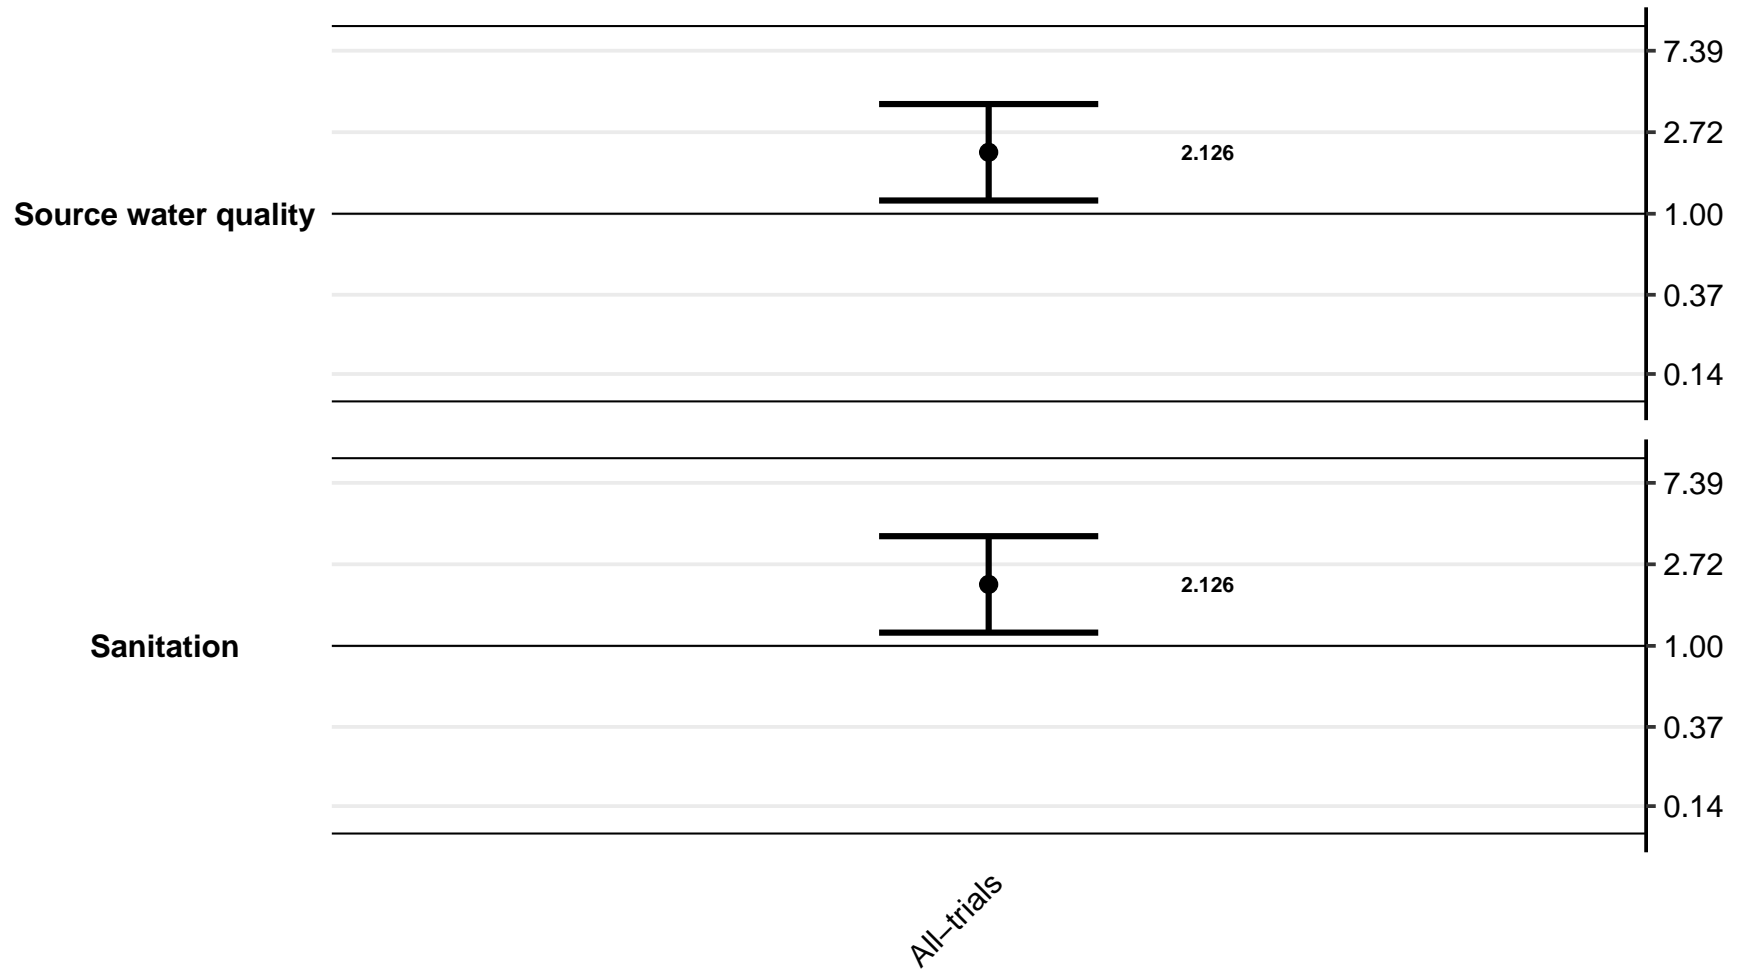

Supplemental figure 5I: Ratio of iron deficiency anemia prevalence ratios

5I2: By study design effect modifiers

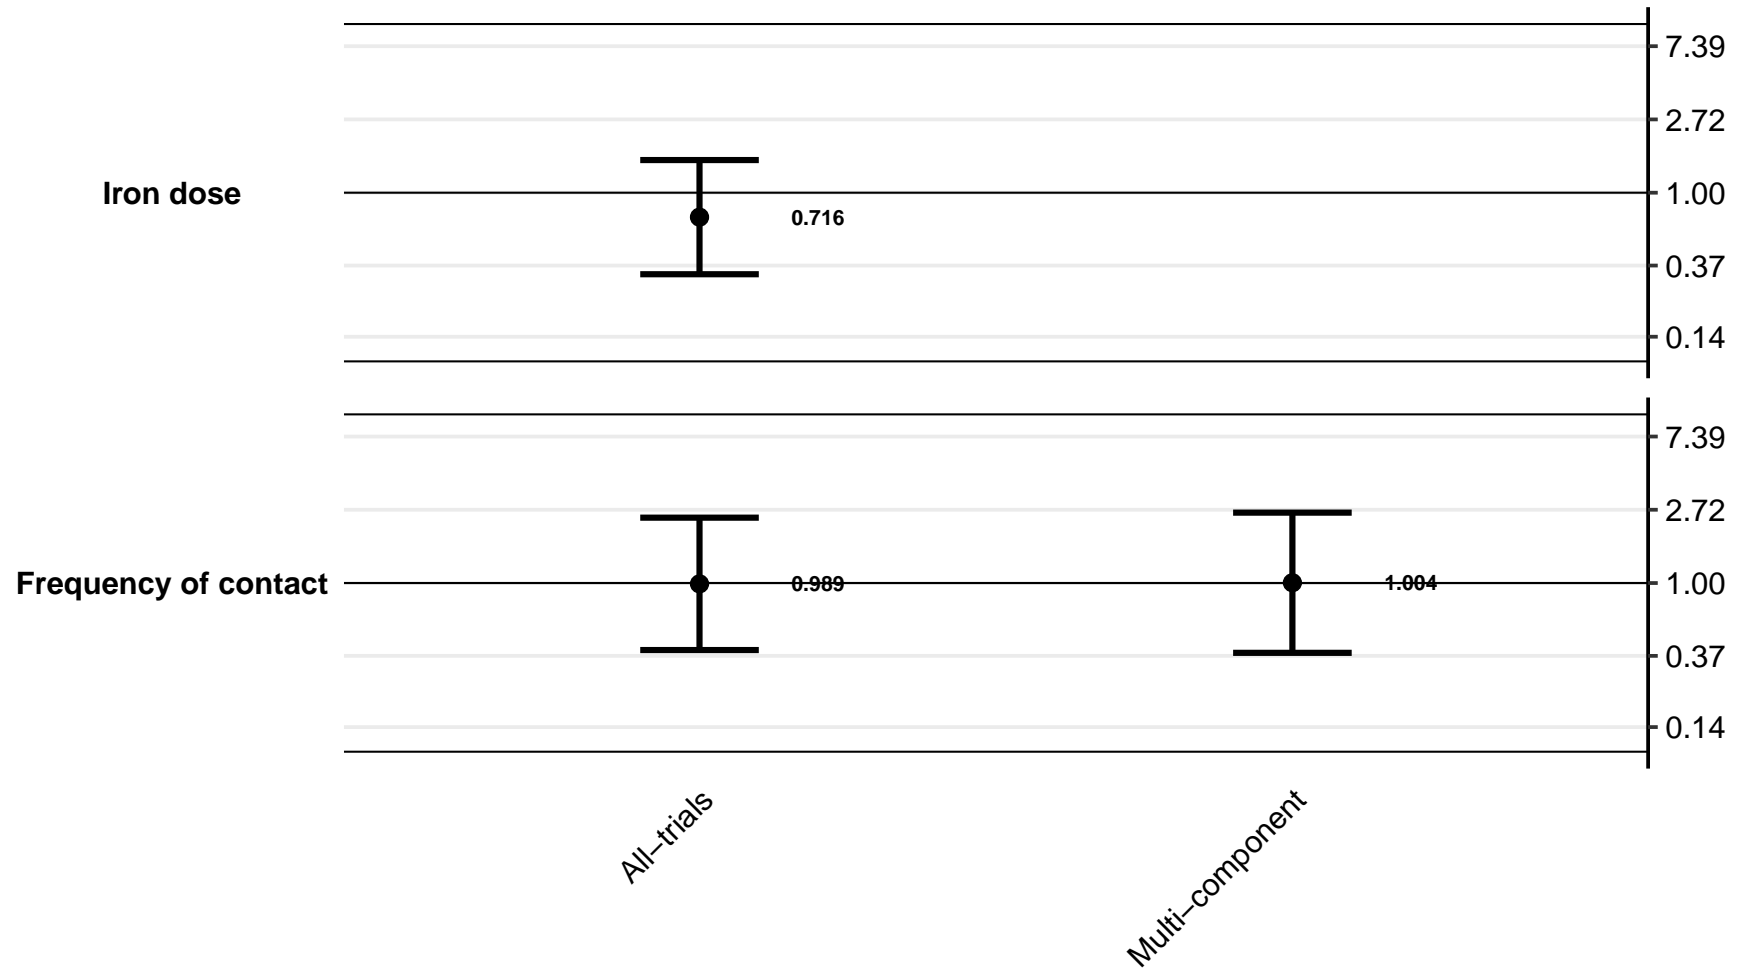

# Supplemental figure 5J: Difference in iron deficiency anemia prevalence differences

5J1: By study context effect modifiers

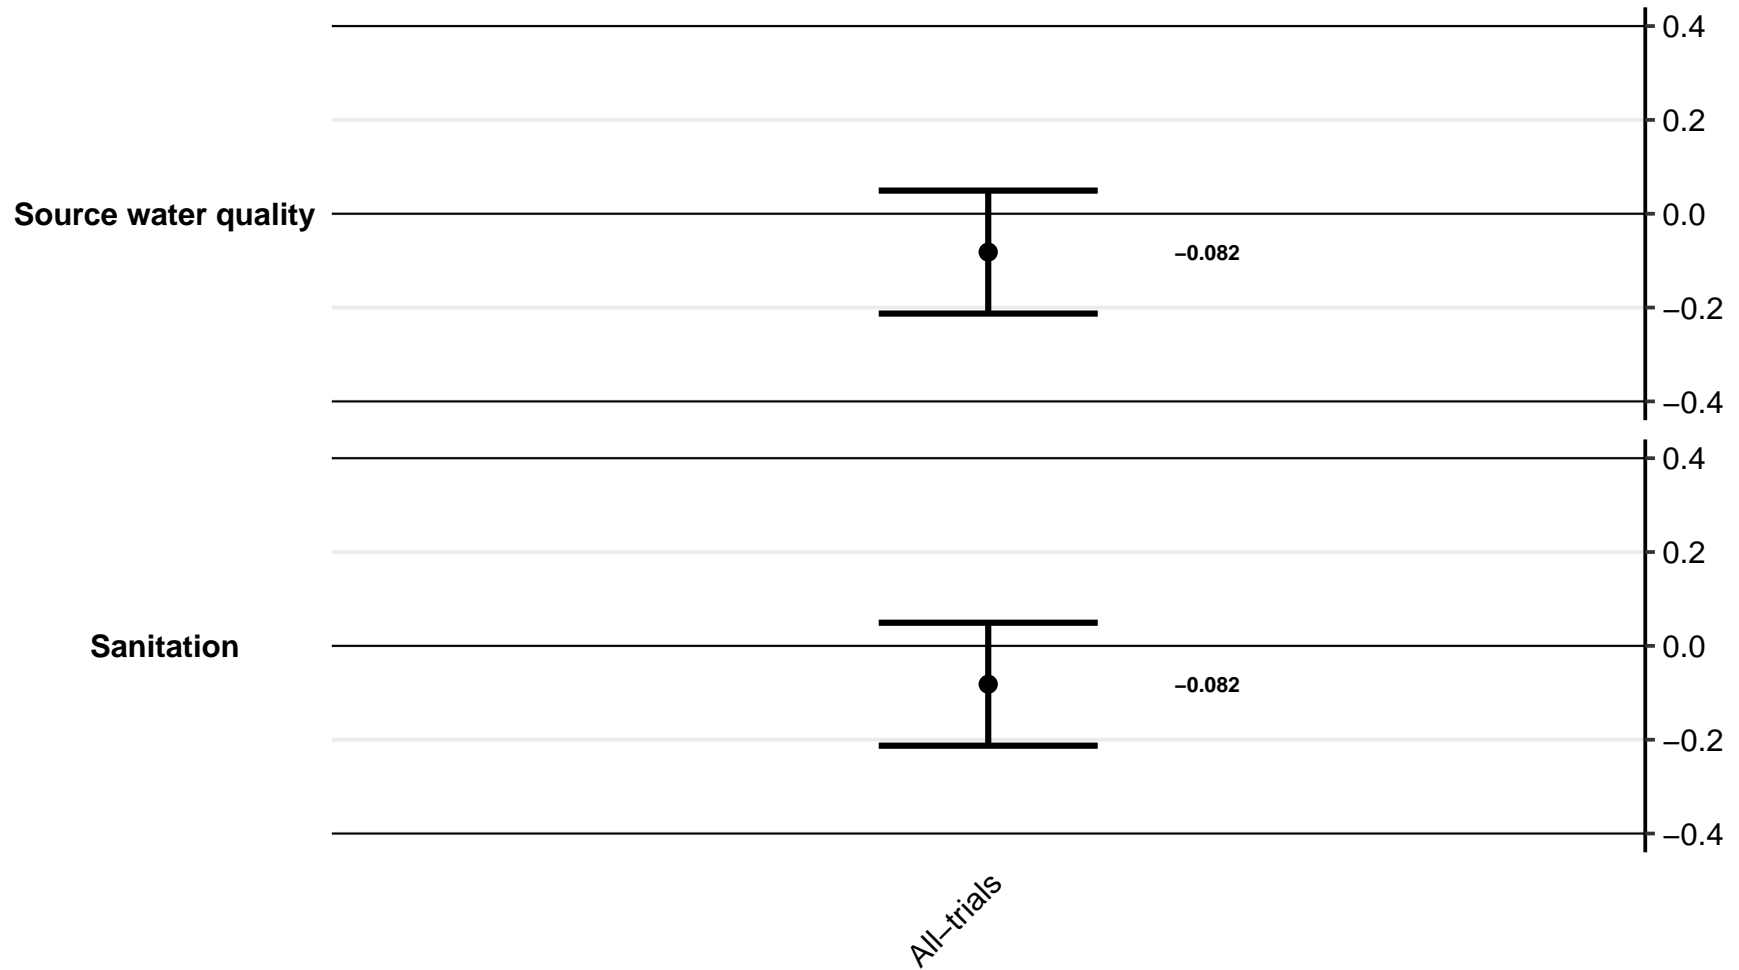

Supplemental figure 5J: Difference in iron deficiency anemia prevalence differences

5J2: By study design effect modifiers

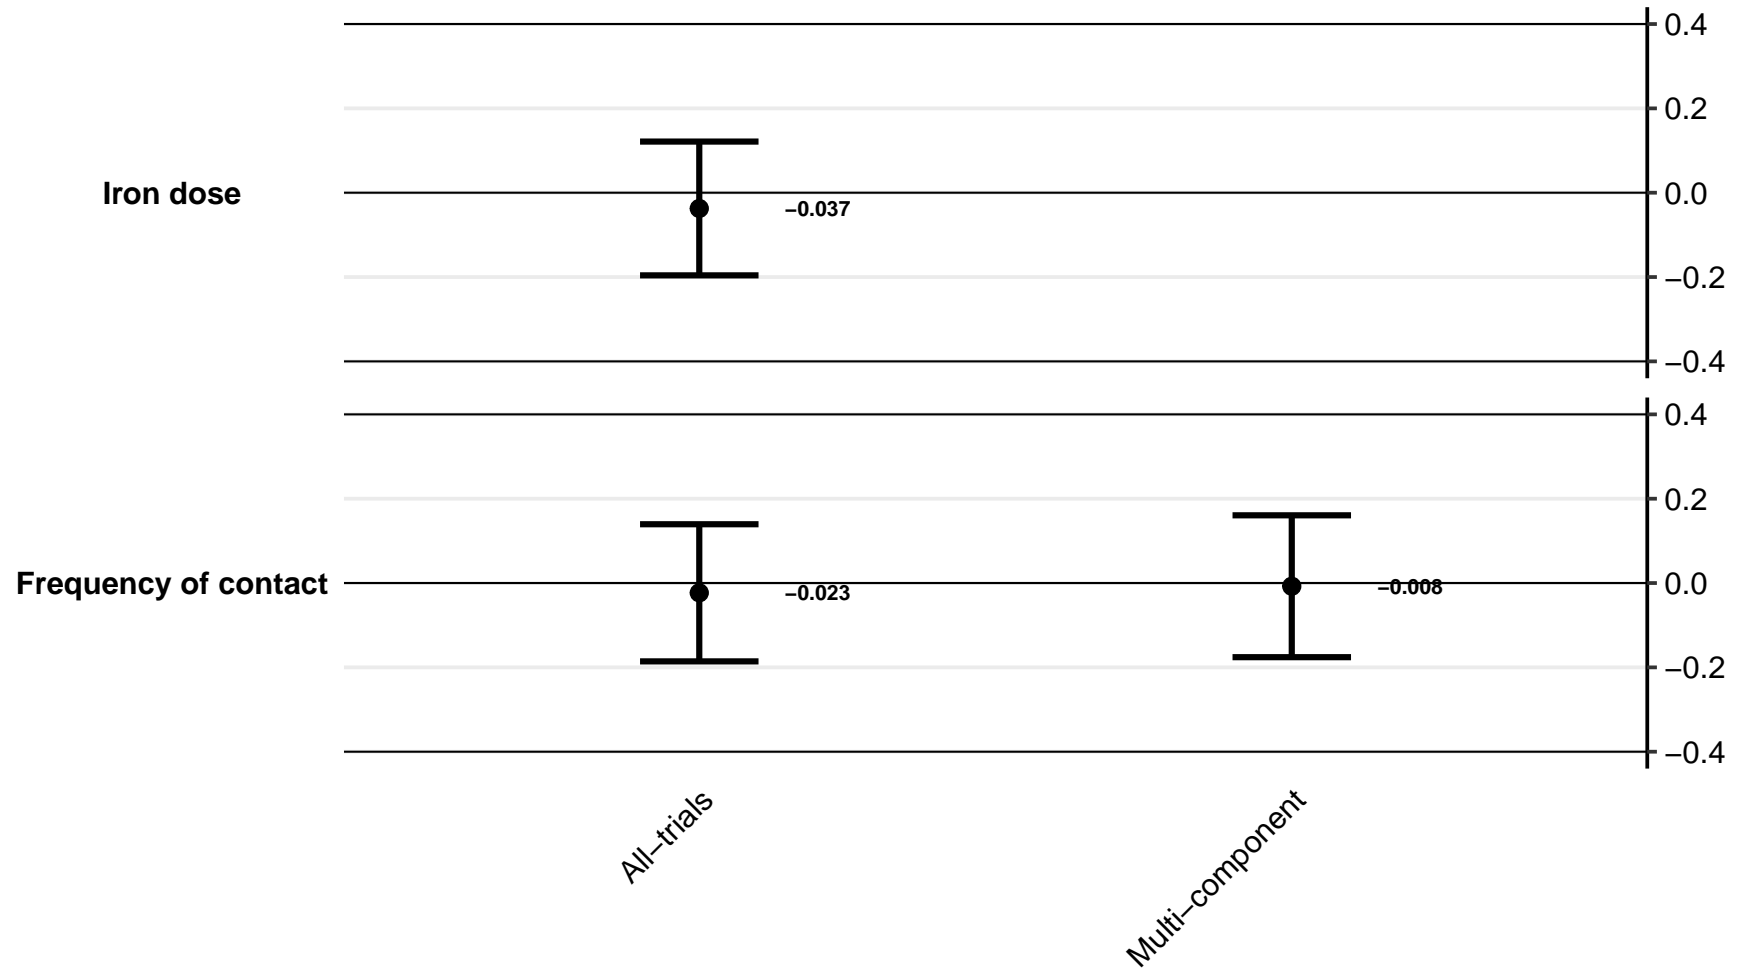

# Supplemental figure 5K: Ratio of geometric mean ratios of soluble transferrin receptor concentration

5K1: By study context effect modifiers

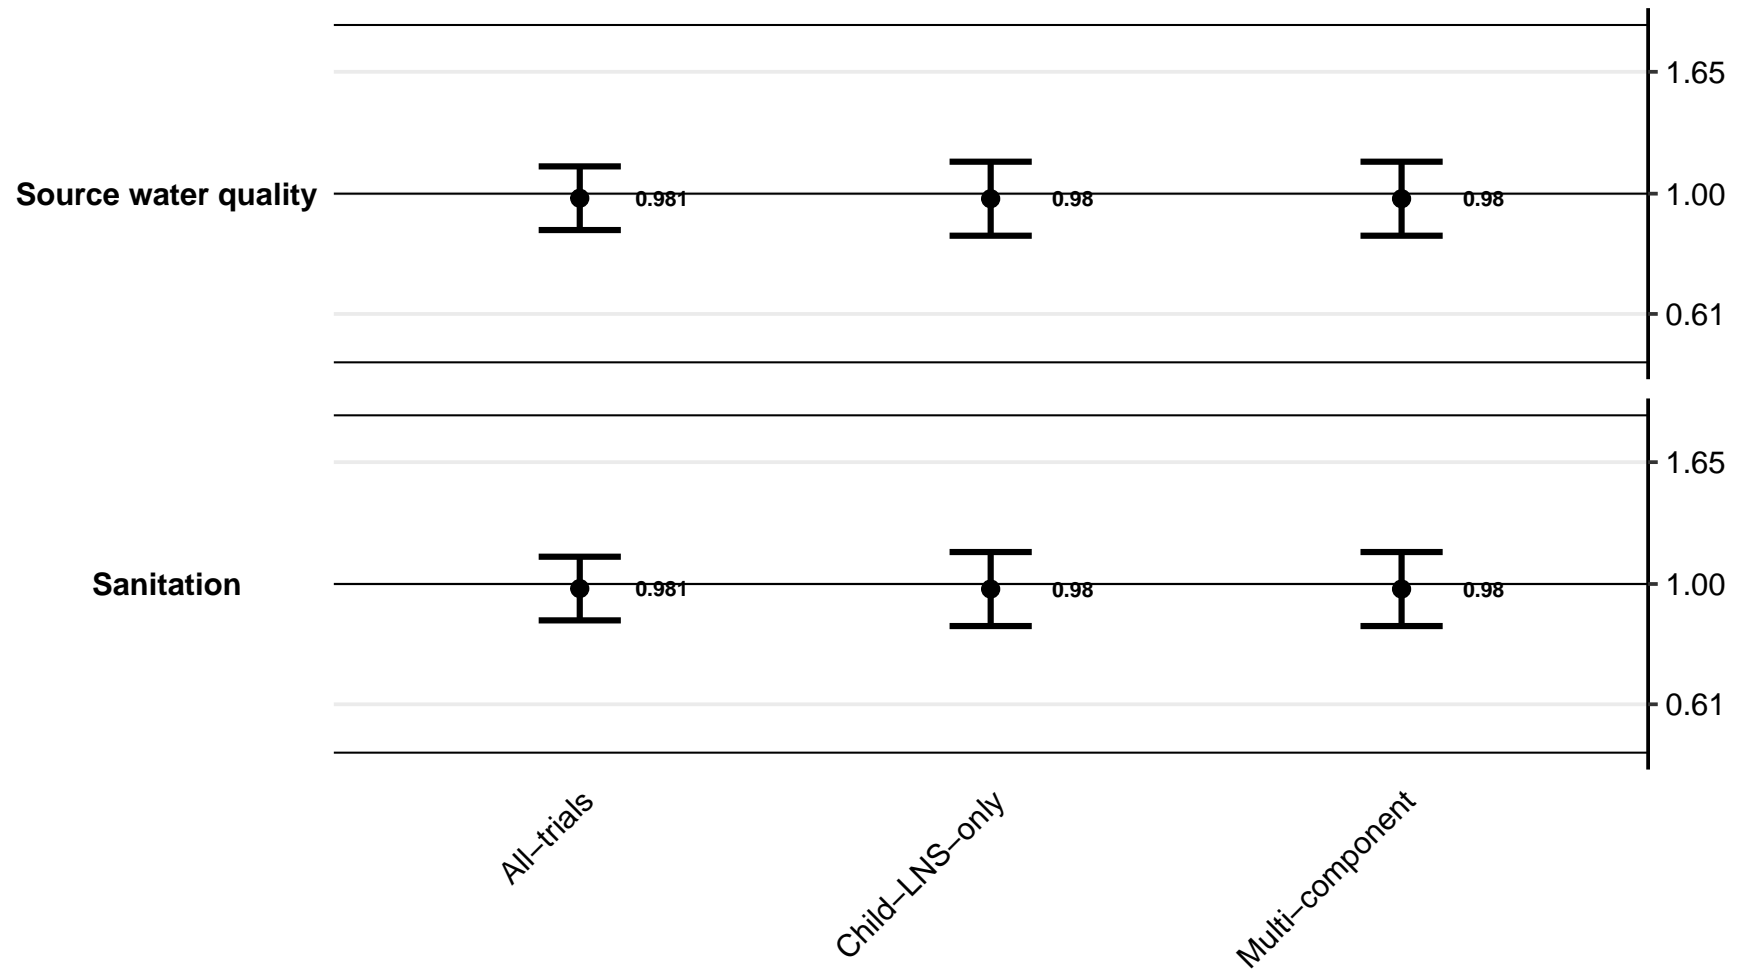

Supplemental figure 5K: Ratio of geometric mean ratios of soluble transferrin receptor concentration

5K2: By study design effect modifiers

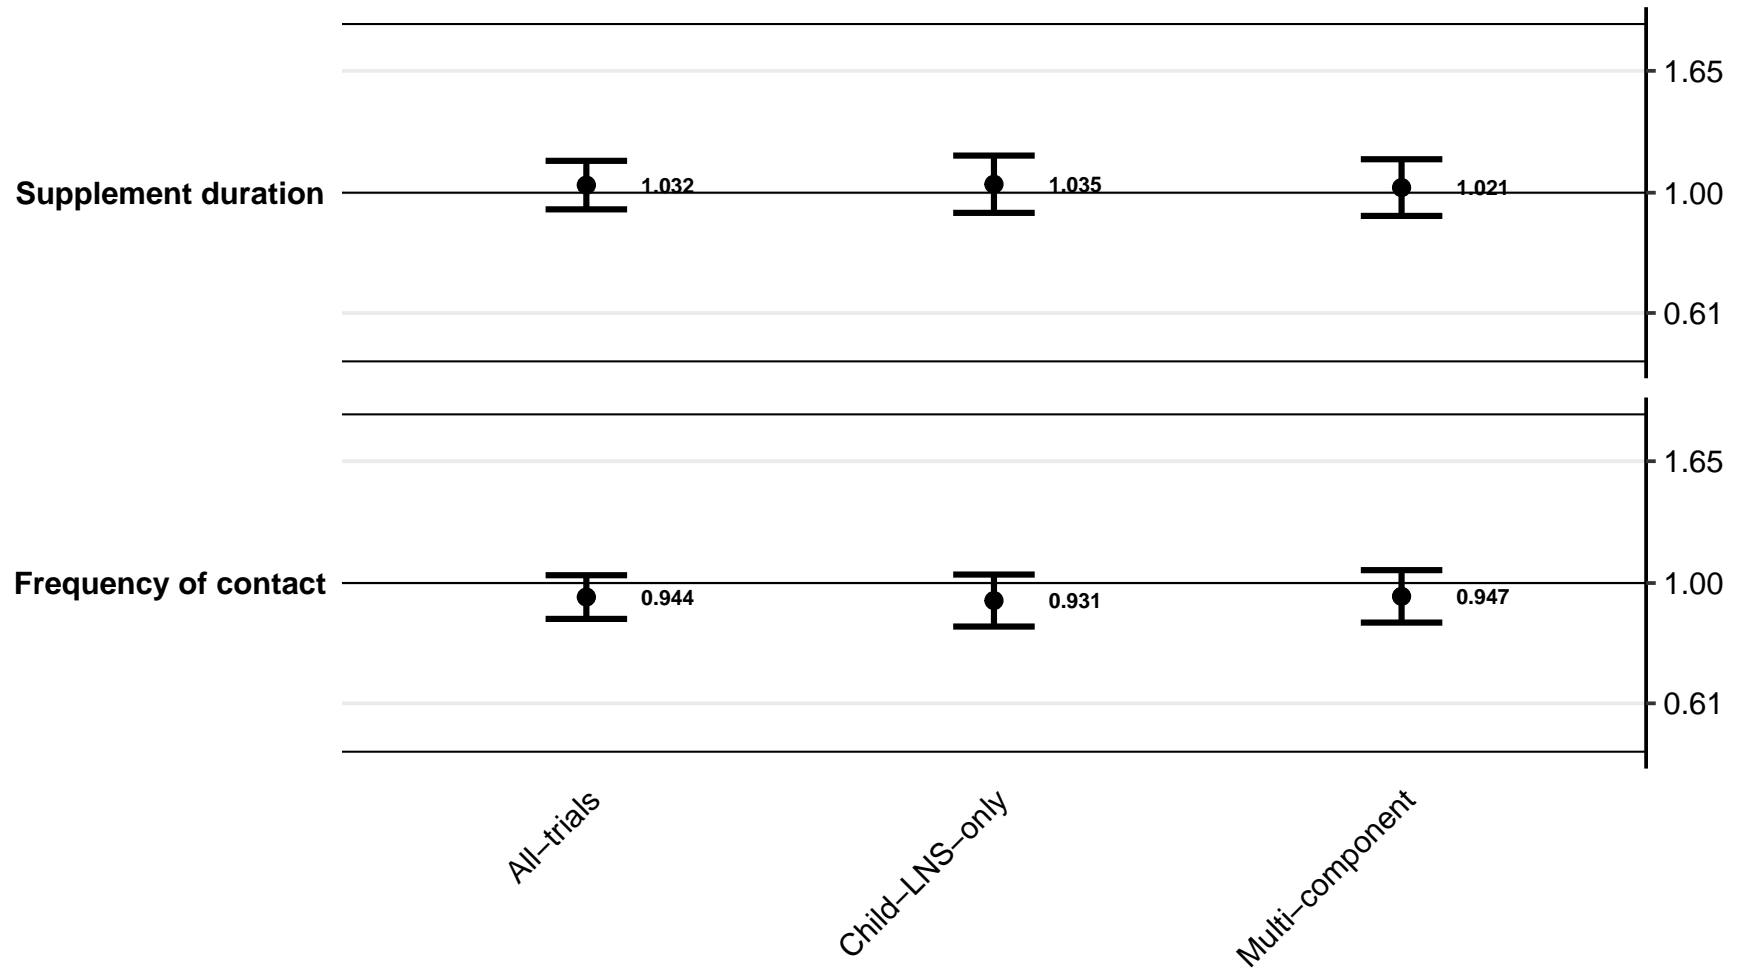

# Supplemental figure 5L: Ratio of elevated soluble transferrin receptor prevalence ratios

5L1: By study context effect modifiers

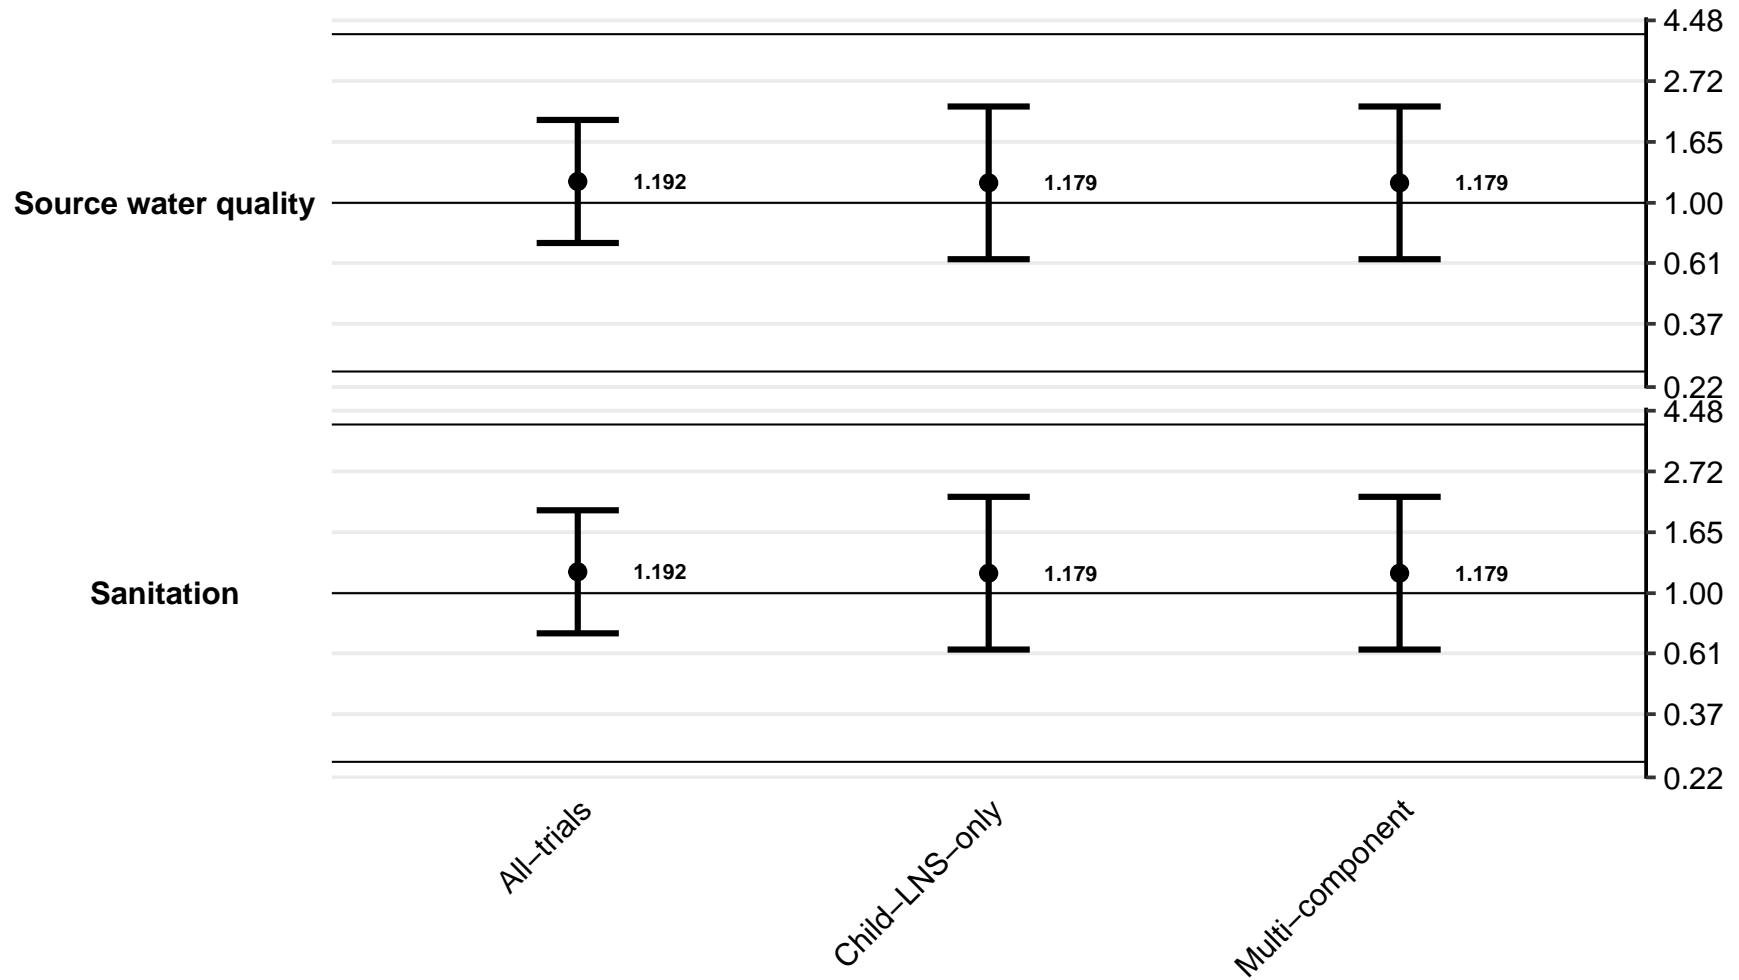

Supplemental figure 5L: Ratio of elevated soluble transferrin receptor prevalence ratios

5L2: By study design effect modifiers

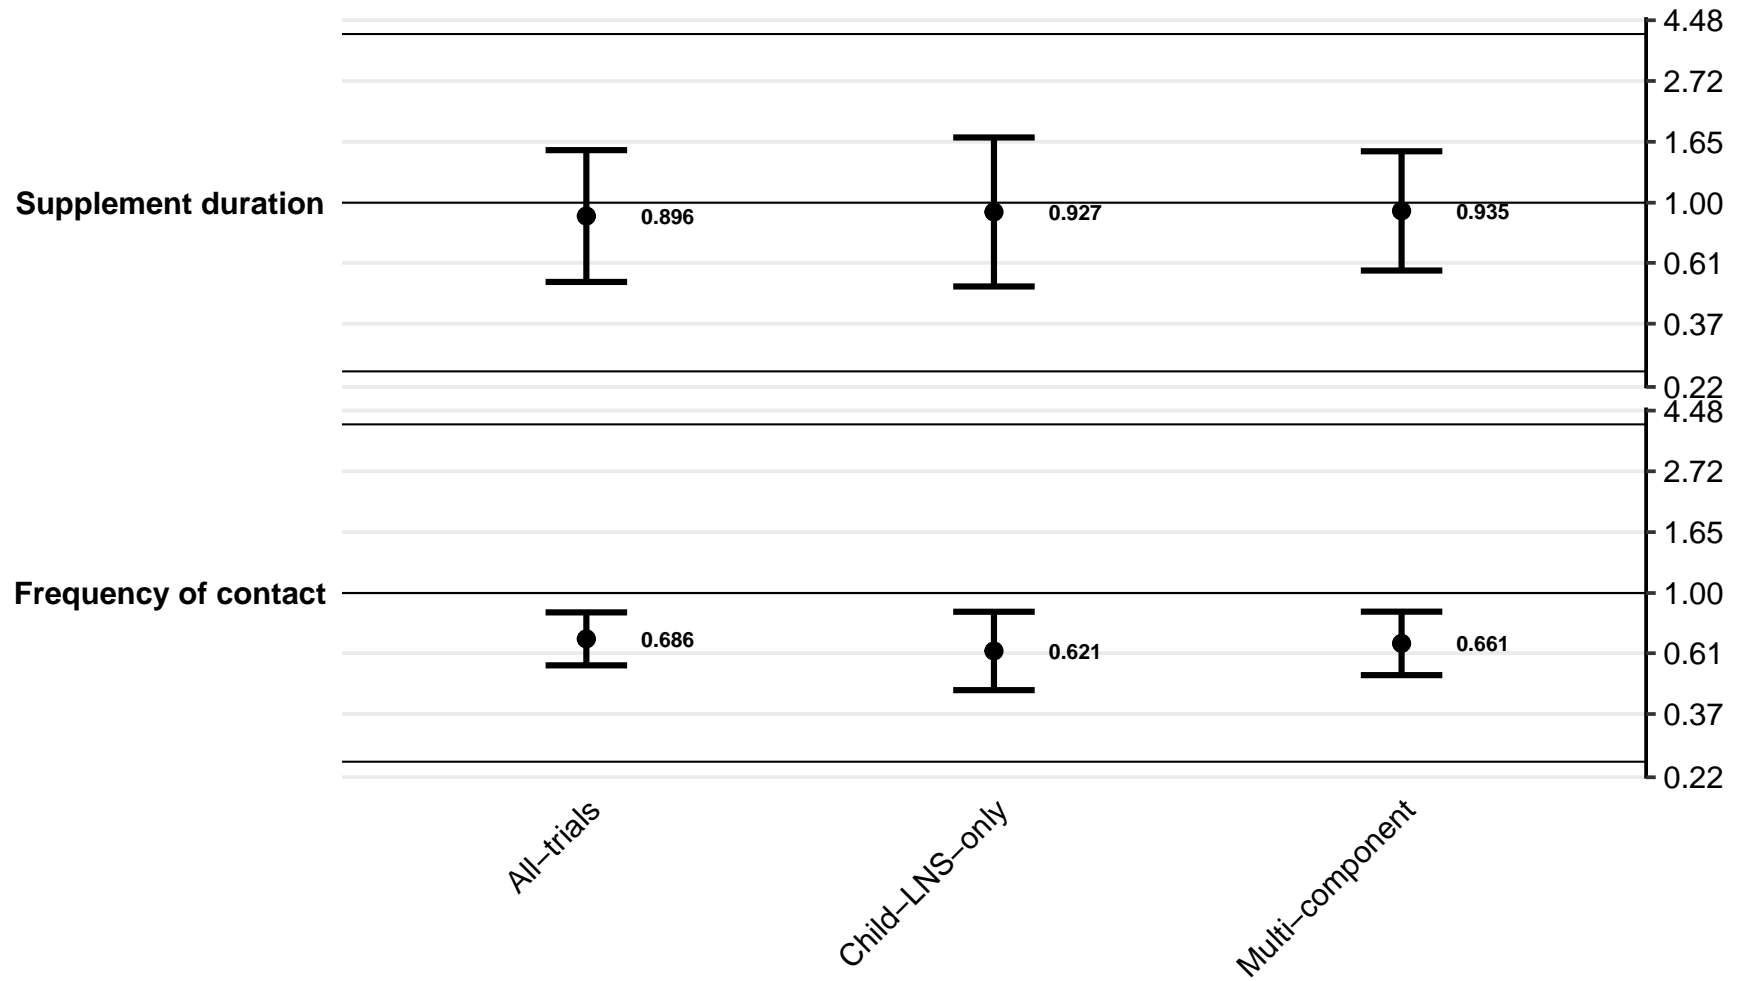



# Supplemental figure 5M: Difference in elevated soluble transferrin receptor prevalence differences

5M1: By study context effect modifiers

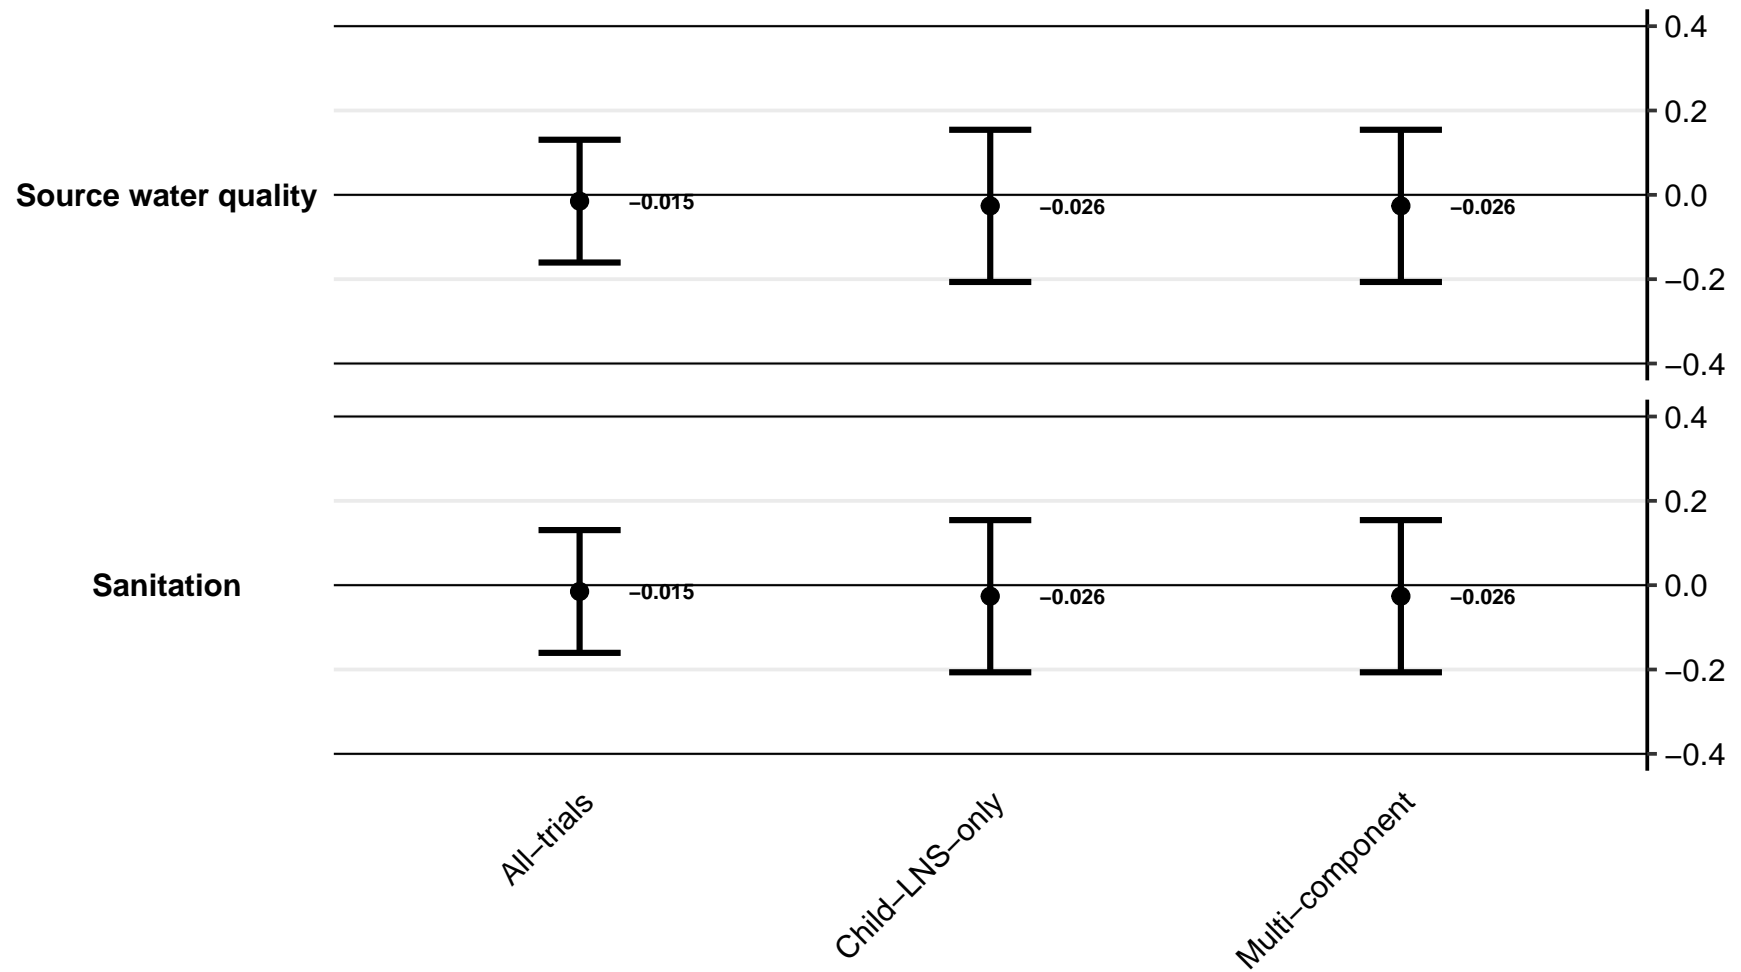

Supplemental figure 5M: Difference in elevated soluble transferrin receptor prevalence differences

5M2: By study design effect modifiers

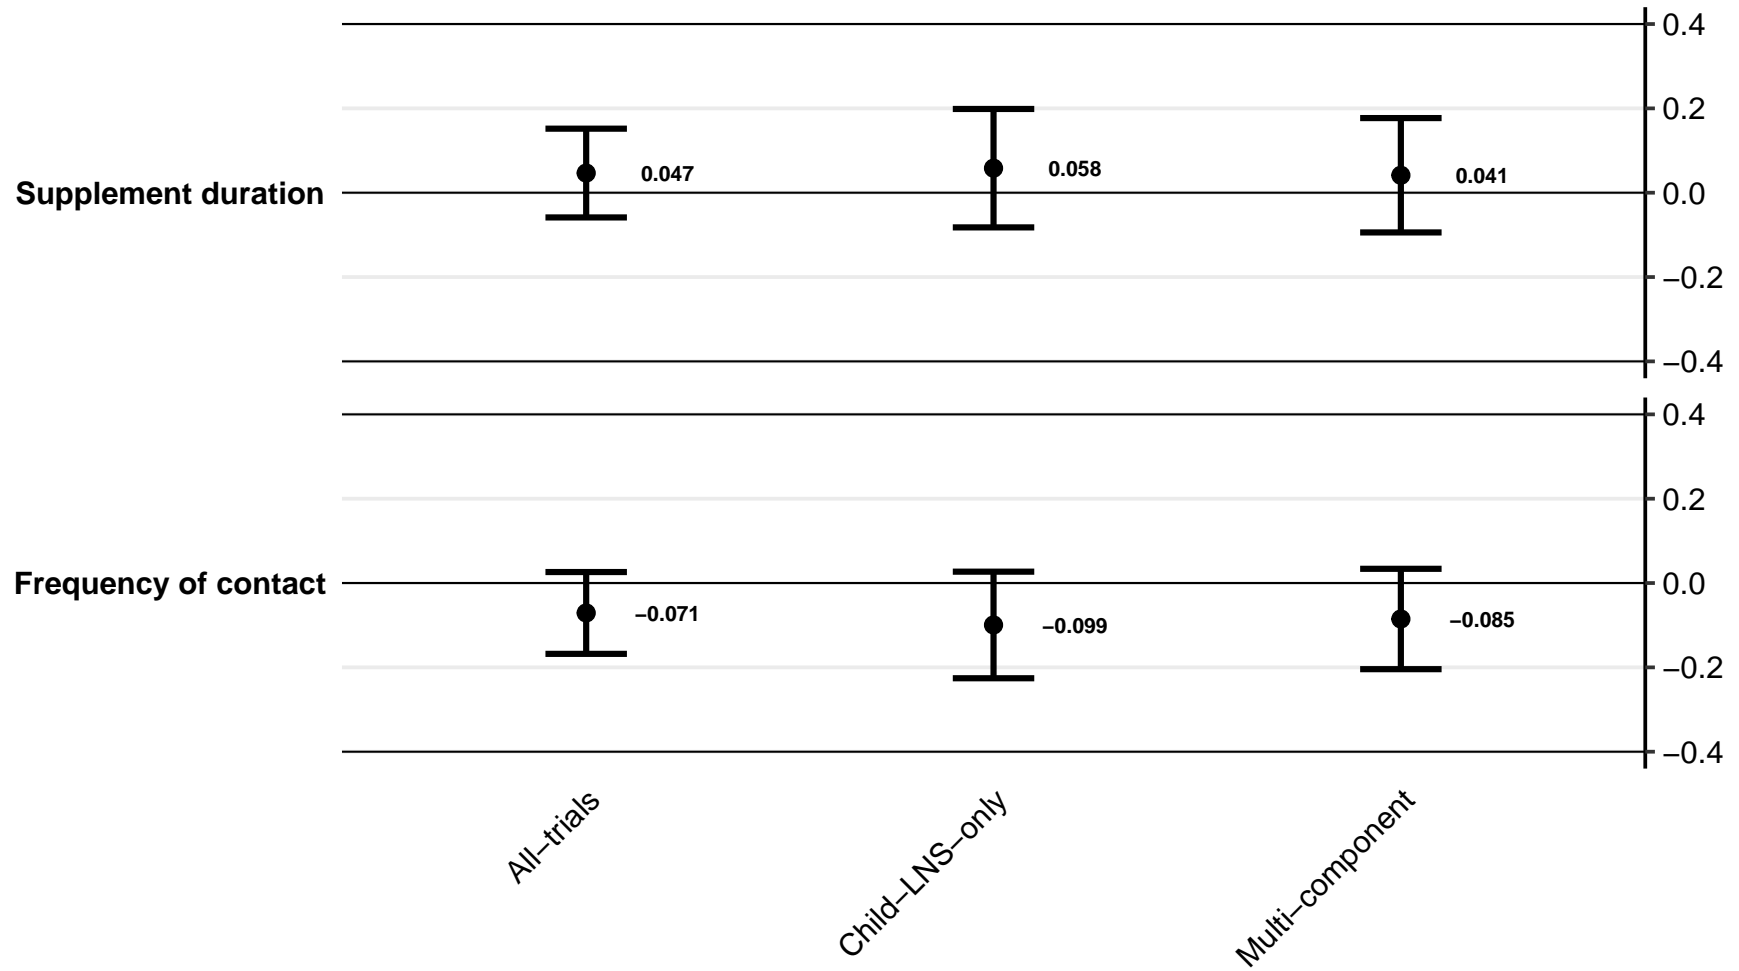

**Supplemental figure 5N: Ratio of geometric mean ratios of zinc protoporphyrin concentration**  
**5N1: By study context effect modifiers (insufficient comparisons)**

Supplemental figure 5N: Ratio of geometric mean ratios of zinc protoporphyrin concentration

5N2: By study design effect modifiers (insufficient comparisons)

**Supplemental figure 5O: Ratio of elevated zinc protoporphyrin prevalence ratios  
5O1: By study context effect modifiers (insufficient comparisons)**

Supplemental figure 5O: Ratio of elevated zinc protoporphyrin prevalence ratios

5O2: By study design effect modifiers (insufficient comparisons)

**Supplemental figure 5P: Difference in elevated zinc protoporphyrin prevalence differences**  
**5P1: By study context effect modifiers (insufficient comparisons)**

Supplemental figure 5P: Difference in elevated zinc protoporphyrin prevalence differences

5P2: By study design effect modifiers (insufficient comparisons)



Supplemental figure 5Q: Ratio of geometric mean ratios of plasma zinc concentration  
5Q1: By study context effect modifiers (insufficient comparisons)

Supplemental figure 5Q: Ratio of geometric mean ratios of plasma zinc concentration

5Q2: By study design effect modifiers (insufficient comparisons)

**Supplemental figure 5R: Ratio of geometric mean ratios of retinol concentration**  
**5R1: By study context effect modifiers (insufficient comparisons)**

Supplemental figure 5R: Ratio of geometric mean ratios of retinol concentration

5R2: By study design effect modifiers (insufficient comparisons)

**Supplemental figure 5S: Ratio of low vitamin A (retinol < 0.70 μmol/L) prevalence ratios**  
5S1: By study context effect modifiers (insufficient comparisons)

Supplemental figure 5S: Ratio of low vitamin A (retinol < 0.70  $\mu\text{mol/L}$ ) prevalence ratios

5S2: By study design effect modifiers (insufficient comparisons)

**Supplemental figure 5T: Difference in low vitamin A (retinol < 0.70 μmol/L) prevalence differences**

**5T1: By study context effect modifiers (insufficient comparisons)**

Supplemental figure 5T: Difference in low vitamin A (retinol < 0.70  $\mu\text{mol/L}$ ) prevalence differences

5T2: By study design effect modifiers (insufficient comparisons)



**Supplemental figure 5U: Ratio of marginal vitamin A (retinol < 1.05 µmol/L) prevalence ratios  
5U1: By study context effect modifiers (insufficient comparisons)**

Supplemental figure 5U: Ratio of marginal vitamin A (retinol < 1.05  $\mu\text{mol/L}$ ) prevalence ratios

5U2: By study design effect modifiers (insufficient comparisons)

**Supplemental figure 5V: Difference in marginal vitamin A (retinol < 1.05 µmol/L) prevalence differences**

5V1: By study context effect modifiers (insufficient comparisons)

Supplemental figure 5V: Difference in marginal vitamin A (retinol < 1.05  $\mu\text{mol/L}$ ) prevalence differences

5V2: By study design effect modifiers (insufficient comparisons)

**Supplemental figure 5W: Ratio of geometric mean ratio of retinol binding protein concentrations**  
**5W1: By study context effect modifiers (insufficient comparisons)**

Supplemental figure 5W: Ratio of geometric mean ratio of retinol binding protein concentrations

5W2: By study design effect modifiers (insufficient comparisons)

**Supplemental figure 5X: Ratio of Low vitamin A status (RBP < 0.70  $\mu\text{mol/L}$ ) prevalence ratios  
5X1: By study context effect modifiers (insufficient comparisons)**

Supplemental figure 5X: Ratio of Low vitamin A status (RBP < 0.70  $\mu\text{mol/L}$ ) prevalence ratios

5X2: By study design effect modifiers (insufficient comparisons)



**Supplemental figure 5Y: Difference in low vitamin A status (RBP < 0.70  $\mu$ mol/L) prevalence differences**

5Y1: By study context effect modifiers (insufficient comparisons)

Supplemental figure 5Y: Difference in low vitamin A status (RBP < 0.70  $\mu\text{mol/L}$ ) prevalence differences

5Y2: By study design effect modifiers (insufficient comparisons)

**Supplemental figure 5Z: Ratio of marginal vitamin A status (RBP < 1.05  $\mu\text{mol/L}$ ) prevalence ratios**

**5Z1: By study context effect modifiers (insufficient comparisons)**

Supplemental figure 5Z: Ratio of marginal vitamin A status (RBP < 1.05  $\mu\text{mol/L}$ ) prevalence ratios

5Z2: By study design effect modifiers (insufficient comparisons)

**Supplemental figure 5AA: Difference in marginal vitamin A status (RBP < 1.05  $\mu\text{mol/L}$ ) prevalence differences**

5AA1: By study context effect modifiers (insufficient comparisons)

Supplemental figure 5AA: Difference in marginal vitamin A status (RBP < 1.05  $\mu\text{mol/L}$ ) prevalence differences

5AA2: By study design effect modifiers (insufficient comparisons)

## Supplemental figure 6: Forest plots for effects of SQ-LNS on biochemical outcomes stratified by individual-level maternal and child effect modifiers

### Contents

|                                                                                           |           |
|-------------------------------------------------------------------------------------------|-----------|
| <b>Supplemental figure 6A: Mean difference in hemoglobin concentration</b>                | <b>7</b>  |
| 6A1: Stratified by Maternal BMI . . . . .                                                 | 7         |
| 6A2: Stratified by Maternal age . . . . .                                                 | 8         |
| 6A3: Stratified by Maternal education . . . . .                                           | 9         |
| 6A4: Stratified by Child sex . . . . .                                                    | 10        |
| 6A5: Stratified by Child birth order . . . . .                                            | 11        |
| 6A6: Stratified by Child baseline acute malnutrition . . . . .                            | 12        |
| 6A7: Stratified by Child baseline anemia . . . . .                                        | 13        |
| 6A8: Stratified by Child high-dose vitamin A supplementation . . . . .                    | 14        |
| 6A9: Stratified by Child inflammation . . . . .                                           | 15        |
| <br>                                                                                      |           |
| <b>Supplemental figure 6B: Anemia prevalence ratio</b>                                    | <b>16</b> |
| 6B1: Stratified by Maternal BMI . . . . .                                                 | 16        |
| 6B2: Stratified by Maternal age . . . . .                                                 | 17        |
| 6B3: Stratified by Maternal education . . . . .                                           | 18        |
| 6B4: Stratified by Child sex . . . . .                                                    | 19        |
| 6B5: Stratified by Child birth order . . . . .                                            | 20        |
| 6B6: Stratified by Child baseline acute malnutrition . . . . .                            | 21        |
| 6B7: Stratified by Child baseline anemia . . . . .                                        | 22        |
| 6B8: Stratified by Child high-dose vitamin A supplementation . . . . .                    | 23        |
| 6B9: Stratified by Child inflammation . . . . .                                           | 24        |
| <br>                                                                                      |           |
| <b>Supplemental figure 6C: Anemia prevalence difference</b>                               | <b>25</b> |
| 6C1: Stratified by Maternal BMI . . . . .                                                 | 25        |
| 6C2: Stratified by Maternal age . . . . .                                                 | 26        |
| 6C3: Stratified by Maternal education . . . . .                                           | 27        |
| 6C4: Stratified by Child sex . . . . .                                                    | 28        |
| 6C5: Stratified by Child birth order . . . . .                                            | 29        |
| 6C6: Stratified by Child baseline acute malnutrition . . . . .                            | 30        |
| 6C7: Stratified by Child baseline anemia . . . . .                                        | 31        |
| 6C8: Stratified by Child high-dose vitamin A supplementation . . . . .                    | 32        |
| 6C9: Stratified by Child inflammation . . . . .                                           | 33        |
| <br>                                                                                      |           |
| <b>Supplemental figure 6D: Moderate-to-severe anemia prevalence ratio</b>                 | <b>34</b> |
| 6D1: Stratified by Maternal BMI . . . . .                                                 | 34        |
| 6D2: Stratified by Maternal age . . . . .                                                 | 35        |
| 6D3: Stratified by Maternal education . . . . .                                           | 36        |
| 6D4: Stratified by Child sex . . . . .                                                    | 37        |
| 6D5: Stratified by Child birth order . . . . .                                            | 38        |
| 6D6: Stratified by Child baseline acute malnutrition (insufficient comparisons) . . . . . | 39        |
| 6b7: Stratified by Child baseline anemia . . . . .                                        | 40        |

|                                                                                              |           |
|----------------------------------------------------------------------------------------------|-----------|
| 6D8: Stratified by Child high-dose vitamin A supplementation . . . . .                       | 41        |
| 6D9: Stratified by Child inflammation . . . . .                                              | 42        |
| <b>Supplemental figure 6E: Moderate-to-severe anemia prevalence difference</b>               | <b>43</b> |
| 6E1: Stratified by Maternal BMI . . . . .                                                    | 43        |
| 6E2: Stratified by Maternal age . . . . .                                                    | 44        |
| 6E3: Stratified by Maternal education . . . . .                                              | 45        |
| 6E4: Stratified by Child sex . . . . .                                                       | 46        |
| 6E5: Stratified by Child birth order . . . . .                                               | 47        |
| 6E6: Stratified by Child baseline acute malnutrition (insufficient comparisons) . . . . .    | 48        |
| 6E7: Stratified by Child baseline anemia . . . . .                                           | 49        |
| 6E8: Stratified by Child high-dose vitamin A supplementation . . . . .                       | 50        |
| 6E9: Stratified by Child inflammation . . . . .                                              | 51        |
| <b>Supplemental figure 6F: Geometric mean ratio of ferritin concentration</b>                | <b>52</b> |
| 6F1: Stratified by Maternal BMI . . . . .                                                    | 52        |
| 6F2: Stratified by Maternal age . . . . .                                                    | 53        |
| 6F3: Stratified by Maternal education . . . . .                                              | 54        |
| 6F4: Stratified by Child sex . . . . .                                                       | 55        |
| 6F5: Stratified by Child birth order . . . . .                                               | 56        |
| 6F6: Stratified by Child baseline acute malnutrition . . . . .                               | 57        |
| 6F7: Stratified by Child baseline anemia (insufficient comparisons) . . . . .                | 58        |
| 6F8: Stratified by Child high-dose vitamin A supplementation . . . . .                       | 59        |
| 6F9: Stratified by Child inflammation . . . . .                                              | 60        |
| <b>Supplemental figure 6G: Iron deficiency (ferritin &lt; 12 µg/L) prevalence ratio</b>      | <b>61</b> |
| 6G1: Stratified by Maternal BMI . . . . .                                                    | 61        |
| 6G2: Stratified by Maternal age . . . . .                                                    | 62        |
| 6G3: Stratified by Maternal education . . . . .                                              | 63        |
| 6G4: Stratified by Child sex . . . . .                                                       | 64        |
| 6G5: Stratified by Child birth order . . . . .                                               | 65        |
| 6G6: Stratified by Child baseline acute malnutrition (insufficient comparisons) . . . . .    | 66        |
| 6G7: Stratified by Child baseline anemia (insufficient comparisons) . . . . .                | 67        |
| 6G8: Stratified by Child high-dose vitamin A supplementation . . . . .                       | 68        |
| 6G9: Stratified by Child inflammation . . . . .                                              | 69        |
| <b>Supplemental figure 6H: Iron deficiency (ferritin &lt; 12 µg/L) prevalence difference</b> | <b>70</b> |
| 6H1: Stratified by Maternal BMI . . . . .                                                    | 70        |
| 6H2: Stratified by Maternal age . . . . .                                                    | 71        |
| 6H3: Stratified by Maternal education . . . . .                                              | 72        |
| 6H4: Stratified by Child sex . . . . .                                                       | 73        |
| 6H5: Stratified by Child birth order . . . . .                                               | 74        |
| 6H6: Stratified by Child baseline acute malnutrition (insufficient comparisons) . . . . .    | 75        |
| 6H7: Stratified by Child baseline anemia (insufficient comparisons) . . . . .                | 76        |
| 6H8: Stratified by Child high-dose vitamin A supplementation . . . . .                       | 77        |
| 6H9: Stratified by Child inflammation . . . . .                                              | 78        |
| <b>Supplemental figure 6I: Iron deficiency anemia prevalence ratio</b>                       | <b>79</b> |
| 6I1: Stratified by Maternal BMI . . . . .                                                    | 79        |
| 6I2: Stratified by Maternal age (insufficient comparisons) . . . . .                         | 80        |
| 6I3: Stratified by Maternal education (insufficient comparisons) . . . . .                   | 81        |



|                                                                                                   |            |
|---------------------------------------------------------------------------------------------------|------------|
| 6I4: Stratified by Child sex . . . . .                                                            | 82         |
| 6I5: Stratified by Child birth order . . . . .                                                    | 83         |
| 6I6: Stratified by Child baseline acute malnutrition (insufficient comparisons) . . . . .         | 84         |
| 6I7: Stratified by Child baseline anemia (insufficient comparisons) . . . . .                     | 85         |
| 6I8: Stratified by Child high-dose vitamin A supplementation (insufficient comparisons) . . . . . | 86         |
| 6I9: Stratified by Child inflammation . . . . .                                                   | 87         |
| <b>Supplemental figure 6J: Iron deficiency anemia prevalence difference</b>                       | <b>88</b>  |
| 6J1: Stratified by Maternal BMI . . . . .                                                         | 88         |
| 6J2: Stratified by Maternal age (insufficient comparisons) . . . . .                              | 89         |
| 6J3: Stratified by Maternal education (insufficient comparisons) . . . . .                        | 90         |
| 6J4: Stratified by Child sex . . . . .                                                            | 91         |
| 6J5: Stratified by Child birth order . . . . .                                                    | 92         |
| 6J6: Stratified by Child baseline acute malnutrition (insufficient comparisons) . . . . .         | 93         |
| 6J7: Stratified by Child baseline anemia (insufficient comparisons) . . . . .                     | 94         |
| 6J8: Stratified by Child high-dose vitamin A supplementation (insufficient comparisons) . . . . . | 95         |
| 6J9: Stratified by Child inflammation . . . . .                                                   | 96         |
| <b>Supplemental figure 6K: Geometric mean ratio of soluble transferrin receptor concentration</b> | <b>97</b>  |
| 6K1: Stratified by Maternal BMI . . . . .                                                         | 97         |
| 6K2: Stratified by Maternal age . . . . .                                                         | 98         |
| 6K3: Stratified by Maternal education . . . . .                                                   | 99         |
| 6K4: Stratified by Child sex . . . . .                                                            | 100        |
| 6K5: Stratified by Child birth order . . . . .                                                    | 101        |
| 6K6: Stratified by Child baseline acute malnutrition (insufficient comparisons) . . . . .         | 102        |
| 6K7: Stratified by Child baseline anemia (insufficient comparisons) . . . . .                     | 103        |
| 6K8: Stratified by Child high-dose vitamin A supplementation . . . . .                            | 104        |
| 6K9: Stratified by Child inflammation . . . . .                                                   | 105        |
| <b>Supplemental figure 6L: Elevated soluble transferrin receptor prevalence ratio</b>             | <b>106</b> |
| 6L1: Stratified by Maternal BMI . . . . .                                                         | 106        |
| 6L2: Stratified by Maternal age . . . . .                                                         | 107        |
| 6L3: Stratified by Maternal education . . . . .                                                   | 108        |
| 6L4: Stratified by Child sex . . . . .                                                            | 109        |
| 6L5: Stratified by Child birth order . . . . .                                                    | 110        |
| 6L6: Stratified by Child baseline acute malnutrition (insufficient comparisons) . . . . .         | 111        |
| 6L7: Stratified by Child baseline anemia (insufficient comparisons) . . . . .                     | 112        |
| 6L8: Stratified by Child high-dose vitamin A supplementation . . . . .                            | 113        |
| 6L9: Stratified by Child inflammation . . . . .                                                   | 114        |
| <b>Supplemental figure 6M: Elevated soluble transferrin receptor prevalence difference</b>        | <b>115</b> |
| 6M1: Stratified by Maternal BMI . . . . .                                                         | 115        |
| 6M2: Stratified by Maternal age . . . . .                                                         | 116        |
| 6M3: Stratified by Maternal education . . . . .                                                   | 117        |
| 6M4: Stratified by Child sex . . . . .                                                            | 118        |
| 6M5: Stratified by Child birth order . . . . .                                                    | 119        |
| 6M6: Stratified by Child baseline acute malnutrition (insufficient comparisons) . . . . .         | 120        |
| 6M7: Stratified by Child baseline anemia (insufficient comparisons) . . . . .                     | 121        |
| 6M8: Stratified by Child high-dose vitamin A supplementation . . . . .                            | 122        |
| 6M9: Stratified by Child inflammation . . . . .                                                   | 123        |

|                                                                                                   |            |
|---------------------------------------------------------------------------------------------------|------------|
| <b>Supplemental figure 6N: Geometric mean ratio of zinc protoporphyrin concentration</b>          | <b>124</b> |
| 6N1: Stratified by Maternal BMI . . . . .                                                         | 124        |
| 6N2: Stratified by Maternal age . . . . .                                                         | 125        |
| 6N3: Stratified by Maternal education . . . . .                                                   | 126        |
| 6N4: Stratified by Child sex . . . . .                                                            | 127        |
| 6N5: Stratified by Child birth order . . . . .                                                    | 128        |
| 6N6: Stratified by Child baseline acute malnutrition . . . . .                                    | 129        |
| 6N7: Stratified by Child baseline anemia . . . . .                                                | 130        |
| 6N8: Stratified by Child high-dose vitamin A supplementation (insufficient comparisons) . . . . . | 131        |
| 6N9: Stratified by Child inflammation . . . . .                                                   | 132        |
| <b>Supplemental figure 6O: Elevated zinc protoporphyrin prevalence ratio</b>                      | <b>133</b> |
| 6O1: Stratified by Maternal BMI . . . . .                                                         | 133        |
| 6O2: Stratified by Maternal age . . . . .                                                         | 134        |
| 6O3: Stratified by Maternal education . . . . .                                                   | 135        |
| 6O4: Stratified by Child sex . . . . .                                                            | 136        |
| 6O5: Stratified by Child birth order . . . . .                                                    | 137        |
| 6O6: Stratified by Child baseline acute malnutrition (insufficient comparisons) . . . . .         | 138        |
| 6O7: Stratified by Child baseline anemia . . . . .                                                | 139        |
| 6O8: Stratified by Child high-dose vitamin A supplementation (insufficient comparisons) . . . . . | 140        |
| 6O9: Stratified by Child inflammation . . . . .                                                   | 141        |
| <b>Supplemental figure 6P: Elevated zinc protoporphyrin prevalence difference</b>                 | <b>142</b> |
| 6P1: Stratified by Maternal BMI . . . . .                                                         | 142        |
| 6P2: Stratified by Maternal age . . . . .                                                         | 143        |
| 6P3: Stratified by Maternal education . . . . .                                                   | 144        |
| 6P4: Stratified by Child sex . . . . .                                                            | 145        |
| 6P5: Stratified by Child birth order . . . . .                                                    | 146        |
| 6P6: Stratified by Child baseline acute malnutrition (insufficient comparisons) . . . . .         | 147        |
| 6P7: Stratified by Child baseline anemia . . . . .                                                | 148        |
| 6P8: Stratified by Child high-dose vitamin A supplementation (insufficient comparisons) . . . . . | 149        |
| 6P9: Stratified by Child inflammation . . . . .                                                   | 150        |
| <b>Supplemental figure 6Q: Geometric mean ratio of plasma zinc concentration</b>                  | <b>151</b> |
| 6Q1: Stratified by Maternal BMI (insufficient comparisons) . . . . .                              | 151        |
| 6Q2: Stratified by Maternal age . . . . .                                                         | 152        |
| 6Q3: Stratified by Maternal education (insufficient comparisons) . . . . .                        | 153        |
| 6Q4: Stratified by Child sex . . . . .                                                            | 154        |
| 6Q5: Stratified by Child birth order . . . . .                                                    | 155        |
| 6Q6: Stratified by Child baseline acute malnutrition (insufficient comparisons) . . . . .         | 156        |
| 6Q7: Stratified by Child baseline anemia (insufficient comparisons) . . . . .                     | 157        |
| 6Q8: Stratified by Child high-dose vitamin A supplementation (insufficient comparisons) . . . . . | 158        |
| 6Q9: Stratified by Child inflammation . . . . .                                                   | 159        |
| <b>Supplemental figure 6R: Geometric mean ratio of retinol concentration</b>                      | <b>160</b> |
| 6R1: Stratified by Maternal BMI (insufficient comparisons) . . . . .                              | 160        |
| 6R2: Stratified by Maternal age . . . . .                                                         | 161        |
| 6R3: Stratified by Maternal education . . . . .                                                   | 162        |
| 6R4: Stratified by Child sex . . . . .                                                            | 163        |
| 6R5: Stratified by Child birth order . . . . .                                                    | 164        |
| 6R6: Stratified by Child baseline acute malnutrition . . . . .                                    | 165        |

|                                                                                                    |            |
|----------------------------------------------------------------------------------------------------|------------|
| 6R7: Stratified by Child baseline anemia (insufficient comparisons) . . . . .                      | 166        |
| 6R8: Stratified by Child high-dose vitamin A supplementation . . . . .                             | 167        |
| 6R9: Stratified by Child inflammation . . . . .                                                    | 168        |
| <b>Supplemental figure 6S: Low vitamin A (retinol &lt; 0.70 µmol/L) prevalence ratio</b>           | <b>169</b> |
| 6S1: Stratified by Maternal BMI (insufficient comparisons) . . . . .                               | 169        |
| 6S2: Stratified by Maternal age (insufficient comparisons) . . . . .                               | 170        |
| 6S3: Stratified by Maternal education (insufficient comparisons) . . . . .                         | 171        |
| 6S4: Stratified by Child sex (insufficient comparisons) . . . . .                                  | 172        |
| 6S5: Stratified by Child birth order (insufficient comparisons) . . . . .                          | 173        |
| 6S6: Stratified by Child baseline acute malnutrition (insufficient comparisons) . . . . .          | 174        |
| 6S7: Stratified by Child baseline anemia (insufficient comparisons) . . . . .                      | 175        |
| 6S8: Stratified by Child high-dose vitamin A supplementation (insufficient comparisons) . . . . .  | 176        |
| 6S9: Stratified by Child inflammation (insufficient comparisons) . . . . .                         | 177        |
| <b>Supplemental figure 6T: Low vitamin A (retinol &lt; 0.70 µmol/L) prevalence difference</b>      | <b>178</b> |
| 6T1: Stratified by Maternal BMI (insufficient comparisons) . . . . .                               | 178        |
| 6T2: Stratified by Maternal age (insufficient comparisons) . . . . .                               | 179        |
| 6T3: Stratified by Maternal education (insufficient comparisons) . . . . .                         | 180        |
| 6T4: Stratified by Child sex (insufficient comparisons) . . . . .                                  | 181        |
| 6T5: Stratified by Child birth order (insufficient comparisons) . . . . .                          | 182        |
| 6T6: Stratified by Child baseline acute malnutrition (insufficient comparisons) . . . . .          | 183        |
| 6T7: Stratified by Child baseline anemia (insufficient comparisons) . . . . .                      | 184        |
| 6T8: Stratified by Child high-dose vitamin A supplementation (insufficient comparisons) . . . . .  | 185        |
| 6T9: Stratified by Child inflammation (insufficient comparisons) . . . . .                         | 186        |
| <b>Supplemental figure 6U: Marginal vitamin A (retinol &lt; 1.05 µmol/L) prevalence ratio</b>      | <b>187</b> |
| 6U1: Stratified by Maternal BMI (insufficient comparisons) . . . . .                               | 187        |
| 6U2: Stratified by Maternal age . . . . .                                                          | 188        |
| 6U3: Stratified by Maternal education (insufficient comparisons) . . . . .                         | 189        |
| 6U4: Stratified by Child sex . . . . .                                                             | 190        |
| 6U5: Stratified by Child birth order . . . . .                                                     | 191        |
| 6U6: Stratified by Child baseline acute malnutrition (insufficient comparisons) . . . . .          | 192        |
| 6U7: Stratified by Child baseline anemia (insufficient comparisons) . . . . .                      | 193        |
| 6U8: Stratified by Child high-dose vitamin A supplementation . . . . .                             | 194        |
| 6U9: Stratified by Child inflammation . . . . .                                                    | 195        |
| <b>Supplemental figure 6V: Marginal vitamin A (retinol &lt; 1.05 µmol/L) prevalence difference</b> | <b>196</b> |
| 6V1: Stratified by Maternal BMI (insufficient comparisons) . . . . .                               | 196        |
| 6V2: Stratified by Maternal age . . . . .                                                          | 197        |
| 6V3: Stratified by Maternal education (insufficient comparisons) . . . . .                         | 198        |
| 6V4: Stratified by Child sex . . . . .                                                             | 199        |
| 6V5: Stratified by Child birth order . . . . .                                                     | 200        |
| 6V6: Stratified by Child baseline acute malnutrition (insufficient comparisons) . . . . .          | 201        |
| 6V7: Stratified by Child baseline anemia (insufficient comparisons) . . . . .                      | 202        |
| 6V8: Stratified by Child high-dose vitamin A supplementation . . . . .                             | 203        |
| 6V9: Stratified by Child inflammation . . . . .                                                    | 204        |
| <b>Supplemental figure 6W: Geometric mean ratio of retinol binding protein concentration</b>       | <b>205</b> |
| 6W1: Stratified by Maternal BMI . . . . .                                                          | 205        |
| 6W2: Stratified by Maternal age . . . . .                                                          | 206        |

|                                                                                                        |            |
|--------------------------------------------------------------------------------------------------------|------------|
| 6W3: Stratified by Maternal education . . . . .                                                        | 207        |
| 6W4: Stratified by Child sex . . . . .                                                                 | 208        |
| 6W5: Stratified by Child birth order . . . . .                                                         | 209        |
| 6W6: Stratified by Child baseline acute malnutrition (insufficient comparisons) . . . . .              | 210        |
| 6W7: Stratified by Child baseline anemia (insufficient comparisons) . . . . .                          | 211        |
| 6W8: Stratified by Child high-dose vitamin A supplementation . . . . .                                 | 212        |
| 6W9: Stratified by Child inflammation . . . . .                                                        | 213        |
| <b>Supplemental figure 6X: Low vitamin A status (RBP &lt; 0.70 µmol/L) prevalence ratio</b>            | <b>214</b> |
| 6X1: Stratified by Maternal BMI (insufficient comparisons) . . . . .                                   | 214        |
| 6X2: Stratified by Maternal age (insufficient comparisons) . . . . .                                   | 215        |
| 6X3: Stratified by Maternal education (insufficient comparisons) . . . . .                             | 216        |
| 6X4: Stratified by Child sex (insufficient comparisons) . . . . .                                      | 217        |
| 6X5: Stratified by Child birth order (insufficient comparisons) . . . . .                              | 218        |
| 6X6: Stratified by Child baseline acute malnutrition (insufficient comparisons) . . . . .              | 219        |
| 6X7: Stratified by Child baseline anemia (insufficient comparisons) . . . . .                          | 220        |
| 6X8: Stratified by Child high-dose vitamin A supplementation (insufficient comparisons) . . . . .      | 221        |
| 6X9: Stratified by Child inflammation (insufficient comparisons) . . . . .                             | 222        |
| <b>Supplemental figure 6Y: Low vitamin A status (RBP &lt; 0.70 µmol/L) prevalence difference</b>       | <b>223</b> |
| 6Y1: Stratified by Maternal BMI (insufficient comparisons) . . . . .                                   | 223        |
| 6Y2: Stratified by Maternal age (insufficient comparisons) . . . . .                                   | 224        |
| 6Y3: Stratified by Maternal education (insufficient comparisons) . . . . .                             | 225        |
| 6Y4: Stratified by Child sex (insufficient comparisons) . . . . .                                      | 226        |
| 6Y5: Stratified by Child birth order (insufficient comparisons) . . . . .                              | 227        |
| 6Y6: Stratified by Child baseline acute malnutrition (insufficient comparisons) . . . . .              | 228        |
| 6Y7: Stratified by Child baseline anemia (insufficient comparisons) . . . . .                          | 229        |
| 6Y8: Stratified by Child high-dose vitamin A supplementation (insufficient comparisons) . . . . .      | 230        |
| 6Y9: Stratified by Child inflammation (insufficient comparisons) . . . . .                             | 231        |
| <b>Supplemental figure 6Z: Marginal vitamin A status (RBP &lt; 1.05 µmol/L) prevalence ratio</b>       | <b>232</b> |
| 6Z1: Stratified by Maternal BMI . . . . .                                                              | 232        |
| 6Z2: Stratified by Maternal age . . . . .                                                              | 233        |
| 6Z3: Stratified by Maternal education . . . . .                                                        | 234        |
| 6Z4: Stratified by Child sex . . . . .                                                                 | 235        |
| 6Z5: Stratified by Child birth order . . . . .                                                         | 236        |
| 6Z6: Stratified by Child baseline acute malnutrition (insufficient comparisons) . . . . .              | 237        |
| 6Z7: Stratified by Child baseline anemia (insufficient comparisons) . . . . .                          | 238        |
| 6Z8: Stratified by Child high-dose vitamin A supplementation (insufficient comparisons) . . . . .      | 239        |
| 6Z9: Stratified by Child inflammation . . . . .                                                        | 240        |
| <b>Supplemental figure 6AA: Marginal vitamin A status (RBP &lt; 1.05 µmol/L) prevalence difference</b> | <b>241</b> |
| 6AA1: Stratified by Maternal BMI . . . . .                                                             | 241        |
| 6AA2: Stratified by Maternal age . . . . .                                                             | 242        |
| 6AA3: Stratified by Maternal education . . . . .                                                       | 243        |
| 6AA4: Stratified by Child sex . . . . .                                                                | 244        |
| 6AA5: Stratified by Child birth order . . . . .                                                        | 245        |
| 6AA6: Stratified by Child baseline acute malnutrition (insufficient comparisons) . . . . .             | 246        |
| 6AA7: Stratified by Child baseline anemia (insufficient comparisons) . . . . .                         | 247        |
| 6AA8: Stratified by Child high-dose vitamin A supplementation (insufficient comparisons) . . . . .     | 248        |
| 6AA9: Stratified by Child inflammation . . . . .                                                       | 249        |

These figures are forest plots showing the individual-level effect modification of intervention effects. Each figure has the estimates of intervention effect stratified within study by individual-level effect modifier category. For continuous outcomes the intervention effect is measured by the difference in mean of the LNS group minus control. For log transformed continuous outcomes, the intervention effect is measured by the ratio of geometric means, the effect estimate is the geometric mean in the LNS group divided by the geometric mean in the control group. For dichotomous outcomes analyzed via prevalence ratios, the effect estimate is the prevalence in the LNS group divided by the prevalence in the control group. For dichotomous outcomes analyzed via prevalence differences, the effect estimate is the prevalence in the LNS group minus the prevalence in the control group. The labels on the far left correspond to trial level information. In the middle left and on the right the values indicate the study level effect estimate, confidence interval, and weighting for deriving the pooled estimates is shown by subgroup.

Not all trials were included in all individual-level effect modification analyses, either because they did not measure the biomarker outcome or the effect modifier of interest (e.g., baseline anemia or acute malnutrition, receipt of high-dose vitamin A supplement), or because the prevalence of the binary outcome or proportion of children within one of the effect modifier subgroups was too low to allow us to generate effect estimates.

RBP, retinol binding protein.

### Supplemental figure 6A: Mean difference in hemoglobin concentration

#### 6A1: Stratified by Maternal BMI

**P-for-interaction = 0.320**  
**Difference in MDs = -0.49 (-1.46, 0.48)**

|               |                   | <b>At least 20 kg/m<sup>2</sup></b> |              |                 |                                                     |            |             | <b>Less than 20 kg/m<sup>2</sup></b> |              |                 |                                                     |            |             |
|---------------|-------------------|-------------------------------------|--------------|-----------------|-----------------------------------------------------|------------|-------------|--------------------------------------|--------------|-----------------|-----------------------------------------------------|------------|-------------|
| Country       | Trial             | LNS<br>N                            | Control<br>N | Control<br>Mean | MD<br>(95% CI)                                      | Fixed<br>W | Random<br>W | LNS<br>N                             | Control<br>N | Control<br>Mean | MD<br>(95% CI)                                      | Fixed<br>W | Random<br>W |
| Bangladesh    | JiVitA-4 (35)     |                                     |              |                 |                                                     |            |             |                                      |              |                 |                                                     |            |             |
| Bangladesh    | RDNS (36)         | 227                                 | 102          | 111.1           | 5.00 (1.85, 8.15)                                   | 0.03       | 0.08        | 300                                  | 160          | 113.1           | 3.69 (0.90, 6.49)                                   | 0.11       | 0.11        |
| Bangladesh    | WASH-B (37)       | 102                                 | 102          | 118.0           | 4.54 (2.27, 6.81)                                   | 0.07       | 0.10        | 132                                  | 84           | 118.3           | 1.91 (-0.70, 4.51)                                  | 0.13       | 0.11        |
| Burkina Faso  | iLiNS-Zinc (38)   | 1217                                | 390          | 88.5            | 8.29 (5.51, 11.07)                                  | 0.04       | 0.09        | 738                                  | 274          | 88.7            | 8.73 (5.13, 12.33)                                  | 0.07       | 0.09        |
| Burkina Faso  | PROMIS CS (39)    | 335                                 | 349          | 102.4           | 1.13 (-0.92, 3.19)                                  | 0.08       | 0.10        | 239                                  | 227          | 102.7           | 2.79 (-0.12, 5.69)                                  | 0.11       | 0.10        |
| Ghana         | GHANA (40)        |                                     |              |                 |                                                     |            |             |                                      |              |                 |                                                     |            |             |
| Ghana         | iLiNS-DYADG (41)  | 288                                 | 536          | 112.4           | 0.99 (-0.49, 2.48)                                  | 0.15       | 0.11        | 35                                   | 114          | 110.2           | 2.33 (-1.69, 6.35)                                  | 0.05       | 0.08        |
| Kenya         | WASH-B (42)       | 266                                 | 227          | 109.3           | 4.70 (2.53, 6.88)                                   | 0.07       | 0.10        | 72                                   | 60           | 113.0           | 0.17 (-3.87, 4.21)                                  | 0.05       | 0.08        |
| Madagascar    | MAHAY (43)        |                                     |              |                 |                                                     |            |             |                                      |              |                 |                                                     |            |             |
| Malawi        | iLiNS-DYADM (44)  | 124                                 | 258          | 107.8           | 1.99 (-1.35, 5.33)                                  | 0.03       | 0.07        | 85                                   | 171          | 108.0           | 0.42 (-3.59, 4.42)                                  | 0.06       | 0.08        |
| Malawi        | iLiNS-DOSE (45)   | 179                                 | 52           | 100.3           | 6.04 (1.31, 10.78)                                  | 0.02       | 0.05        | 61                                   | 29           | 100.6           | -0.01 (-6.19, 6.16)                                 | 0.02       | 0.05        |
| Mali          | PROMIS CS (46)    | 702                                 | 685          | 95.9            | 6.19 (3.84, 8.54)                                   | 0.06       | 0.09        | 246                                  | 279          | 95.4            | 6.43 (4.14, 8.73)                                   | 0.17       | 0.12        |
| Zimbabwe      | SHINE (HIV-) (47) | 1222                                | 1161         | 114.3           | 2.26 (1.34, 3.18)                                   | 0.40       | 0.12        | 213                                  | 220          | 114.8           | 1.10 (-1.04, 3.23)                                  | 0.20       | 0.12        |
| Zimbabwe      | SHINE (HIV+) (48) | 221                                 | 222          | 114.7           | 2.78 (-0.19, 5.76)                                  | 0.04       | 0.08        | 58                                   | 40           | 114.4           | 3.48 (-1.98, 8.94)                                  | 0.03       | 0.06        |
|               |                   | <b>4883</b>                         | <b>4084</b>  |                 |                                                     |            |             | <b>2179</b>                          | <b>1658</b>  |                 |                                                     |            |             |
|               |                   |                                     |              |                 | <b>I<sup>2</sup> = 0.76, Tau<sup>2</sup> = 3.84</b> |            |             |                                      |              |                 | <b>I<sup>2</sup> = 0.63, Tau<sup>2</sup> = 4.11</b> |            |             |
| <b>Fixed</b>  |                   |                                     |              |                 | <b>2.97 (2.39, 3.55)</b>                            |            |             |                                      |              |                 | <b>3.13 (2.18, 4.07)</b>                            |            |             |
| <b>Random</b> |                   |                                     |              |                 | <b>3.79 (2.40, 5.17)</b>                            |            |             |                                      |              |                 | <b>3.01 (1.42, 4.61)</b>                            |            |             |

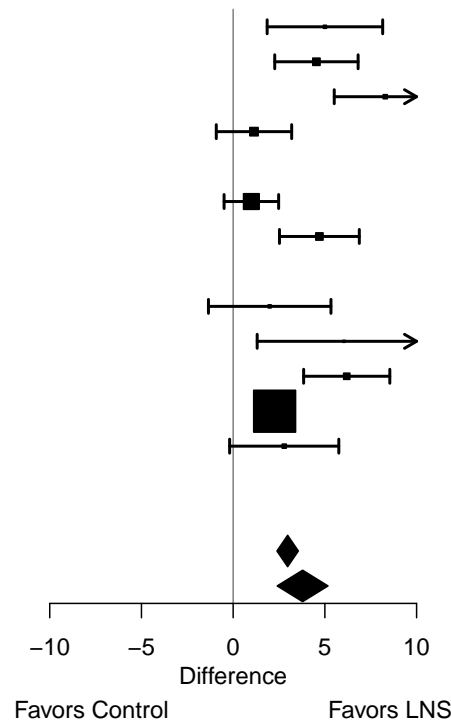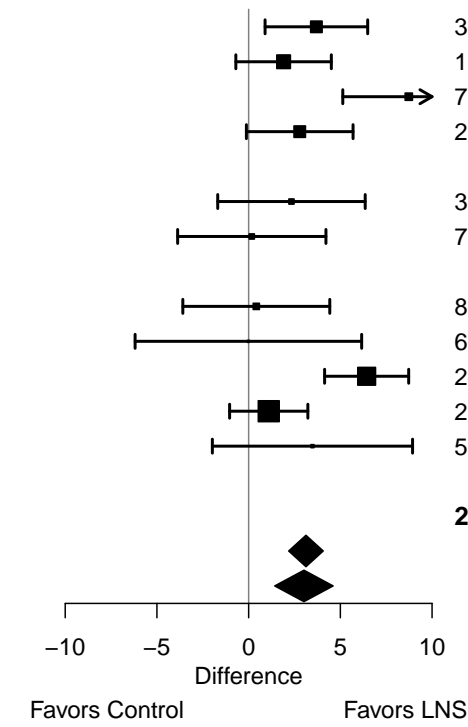

Supplemental figure 6A: Mean difference in hemoglobin concentration

6A2: Stratified by Maternal age

P-for-interaction = 0.015

Difference in MDs = -1.03 (-1.86, -0.20)

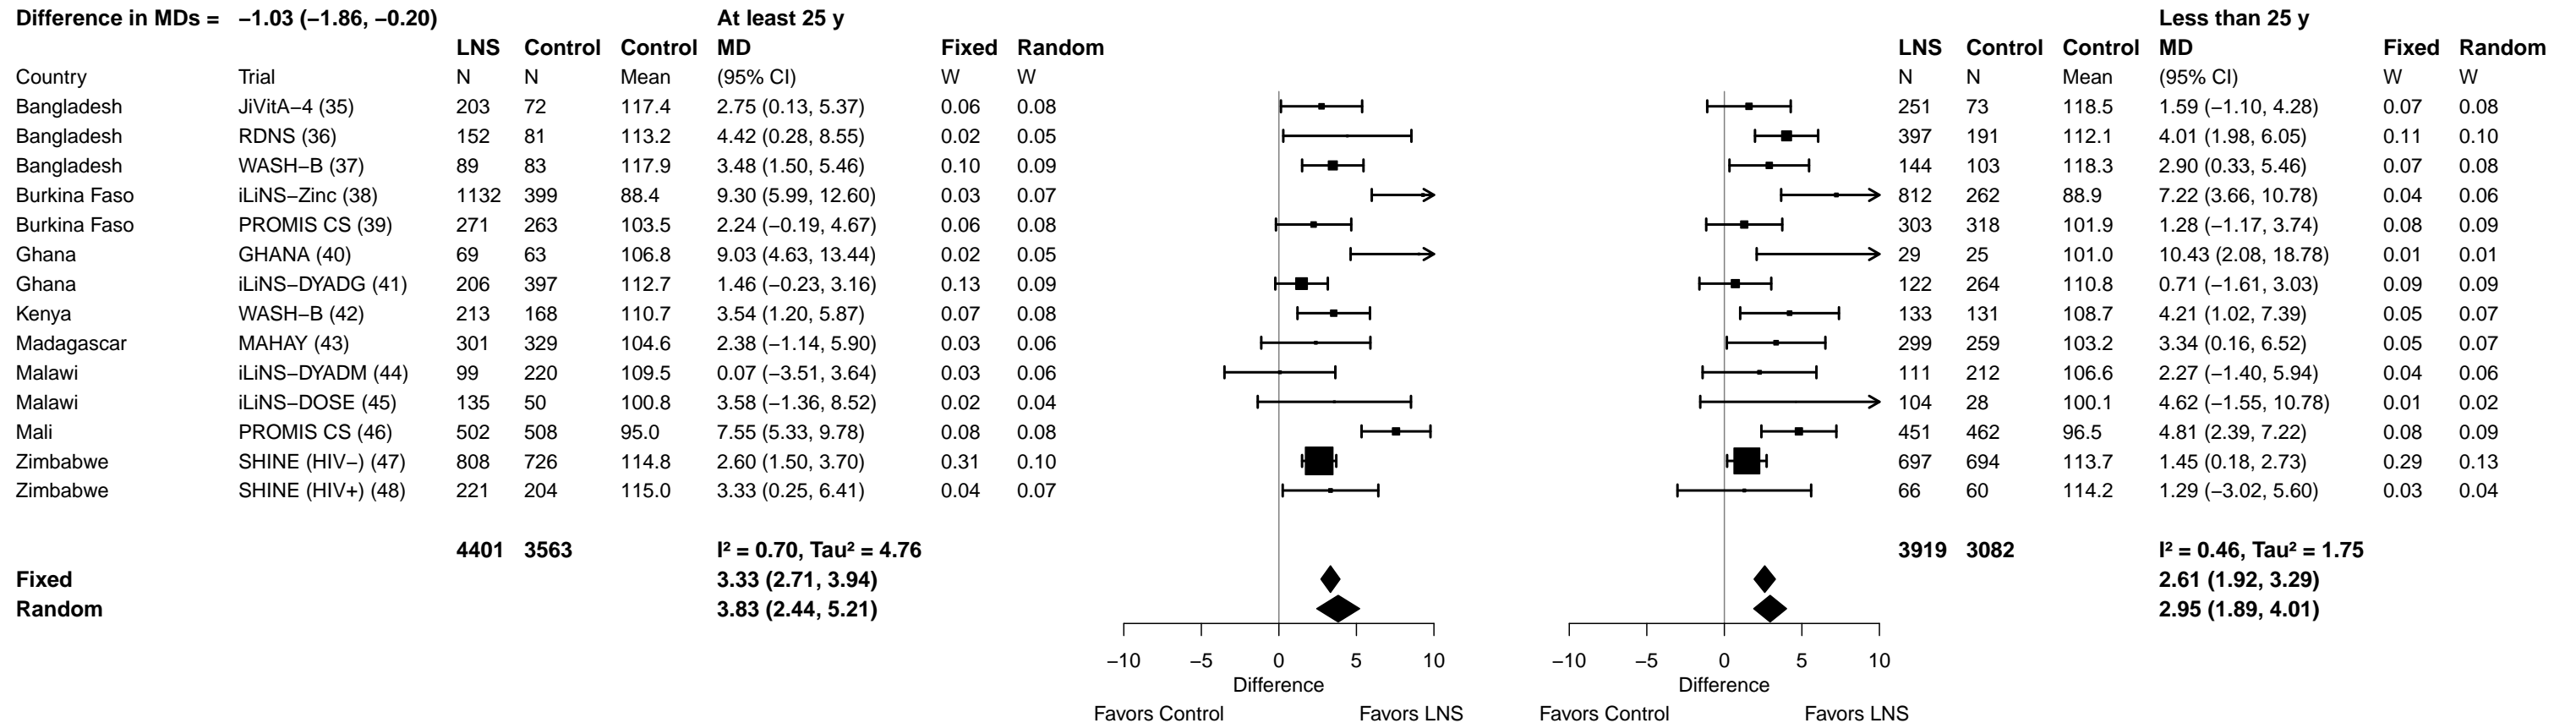

Supplemental figure 6A: Mean difference in hemoglobin concentration

6A3: Stratified by Maternal education

P-for-interaction = 0.212

Difference in MDs = -0.80 (-2.05, 0.45)

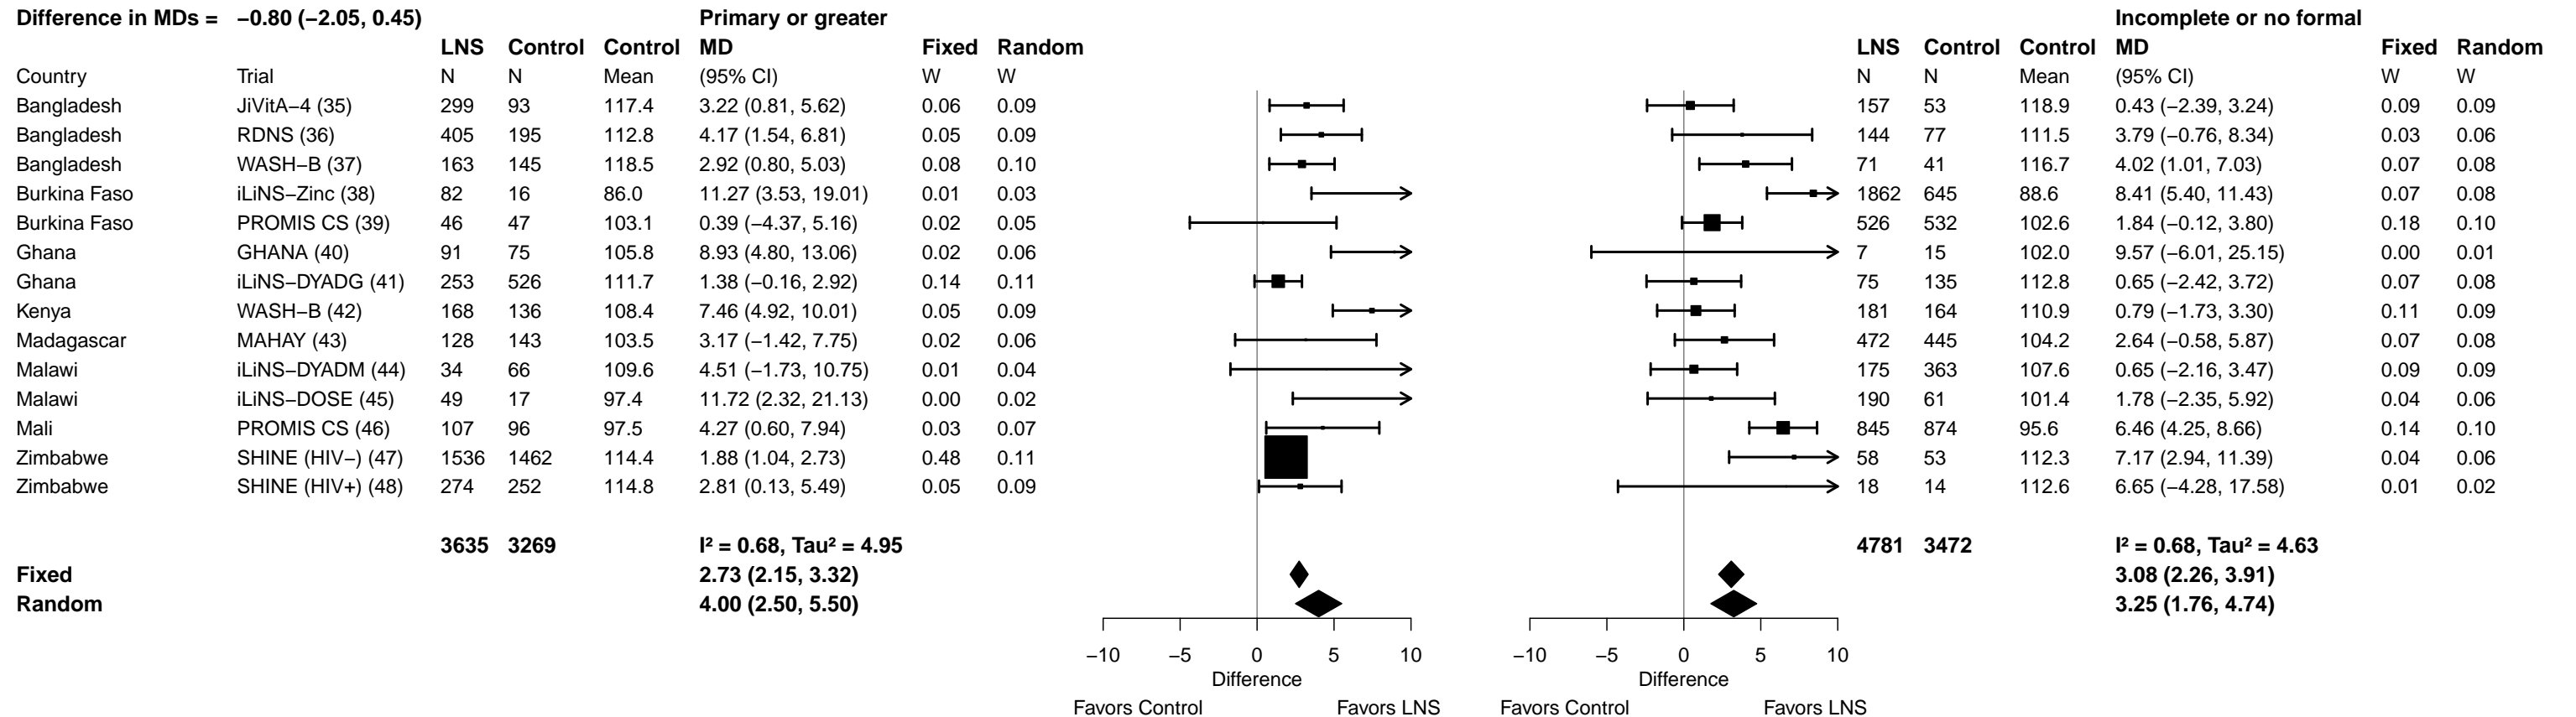



Supplemental figure 6A: Mean difference in hemoglobin concentration

6A4: Stratified by Child sex

P-for-interaction = 0.449

Difference in MDs = -0.30 (-1.08, 0.48)

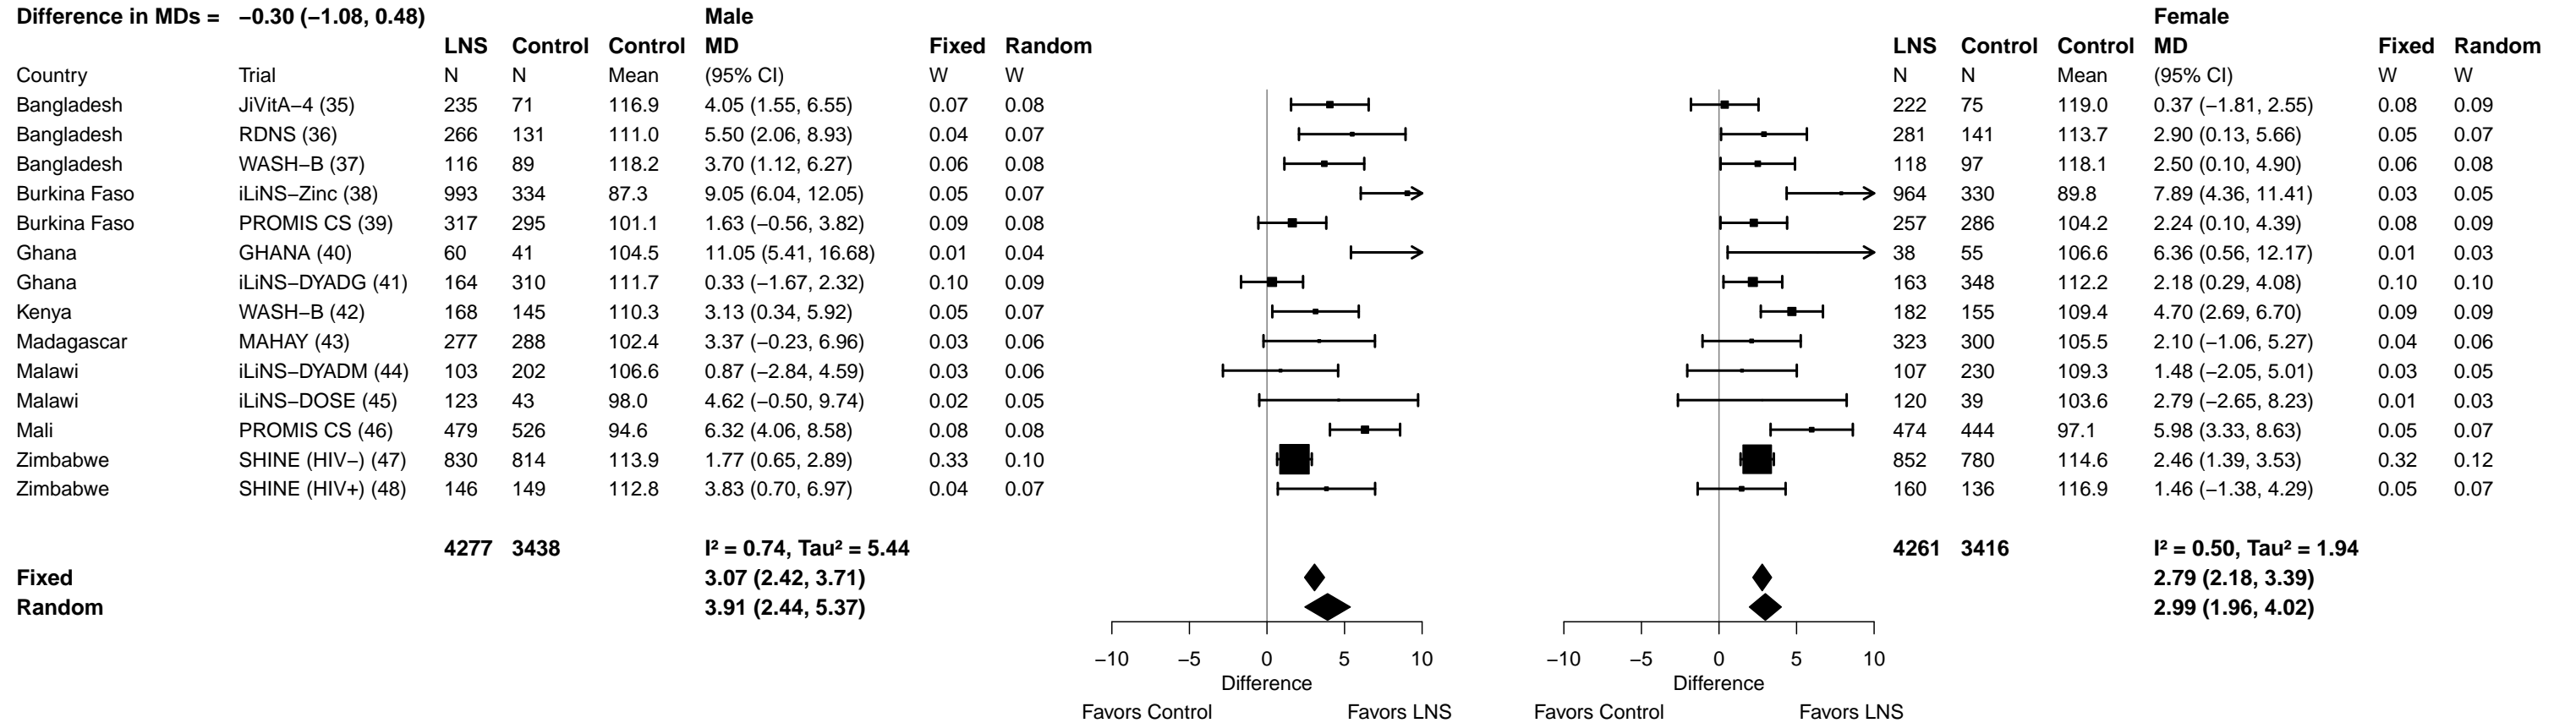

Supplemental figure 6A: Mean difference in hemoglobin concentration

6A5: Stratified by Child birth order

P-for-interaction = 0.003

Difference in MDs = -1.46 (-2.42, -0.50)

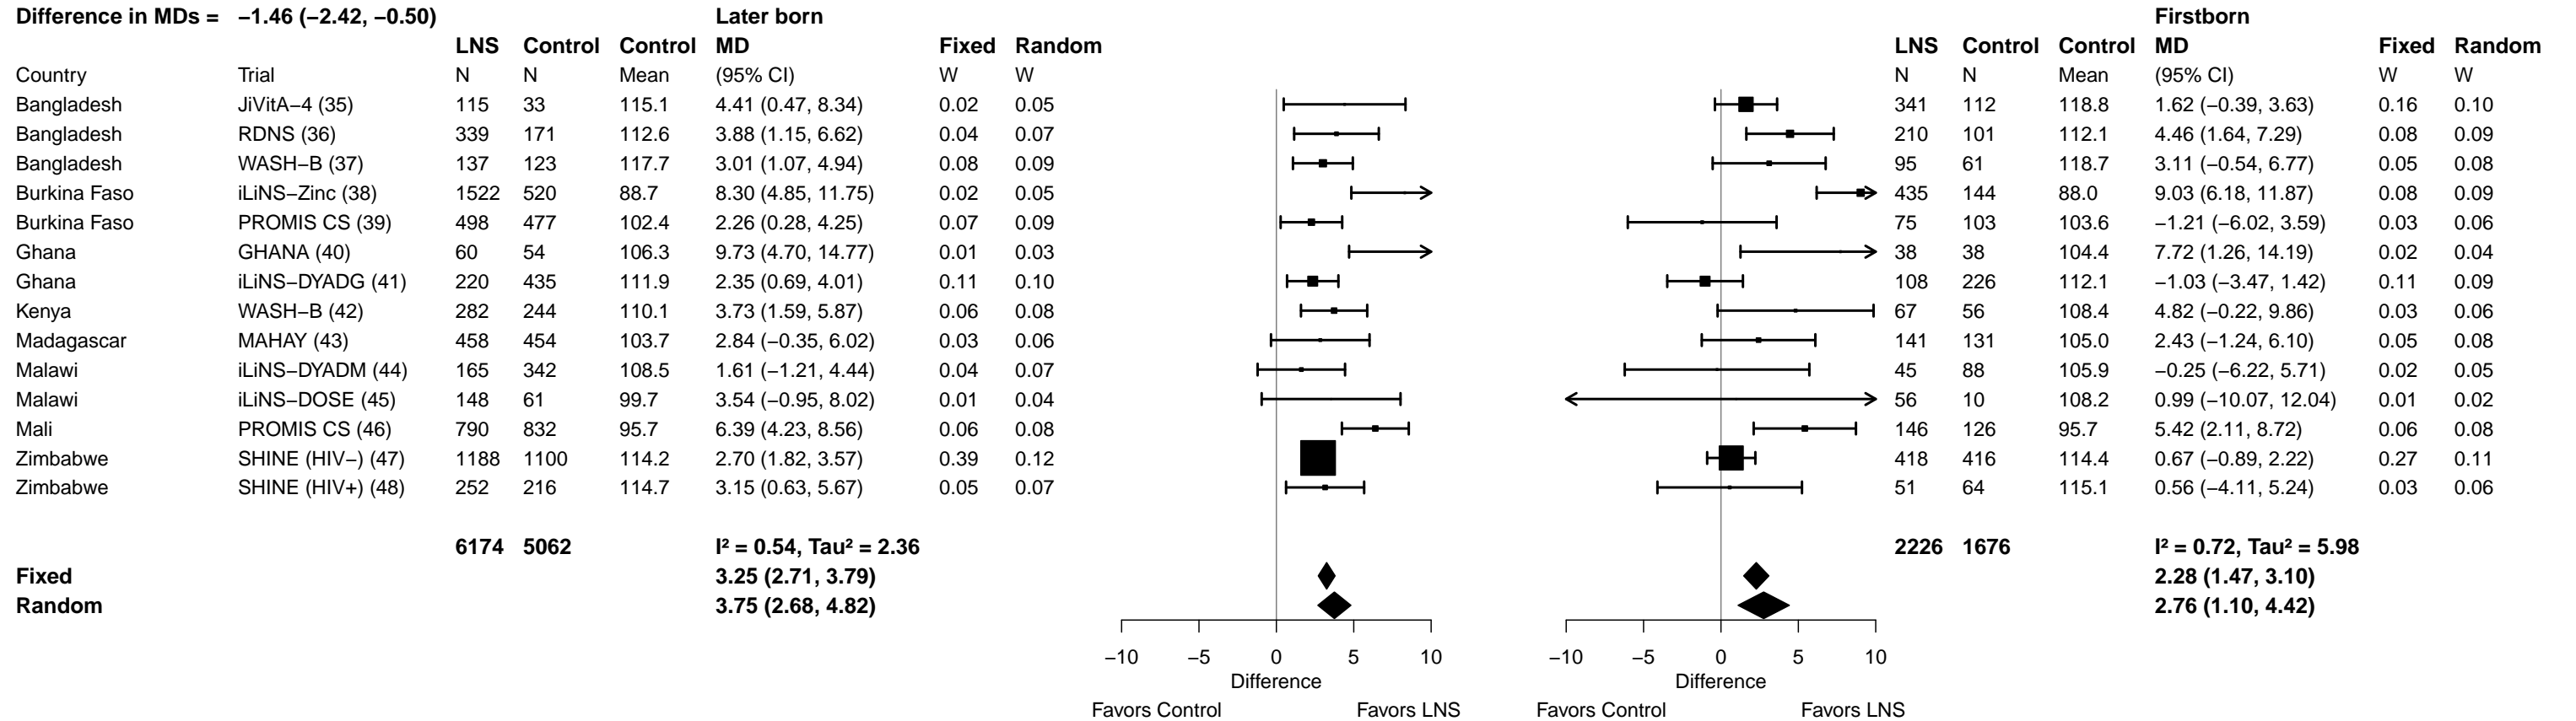

Supplemental figure 6A: Mean difference in hemoglobin concentration

6A6: Stratified by Child baseline acute malnutrition

P-for-interaction = 0.859

Difference in MDs = 0.15 (-1.54, 1.84)

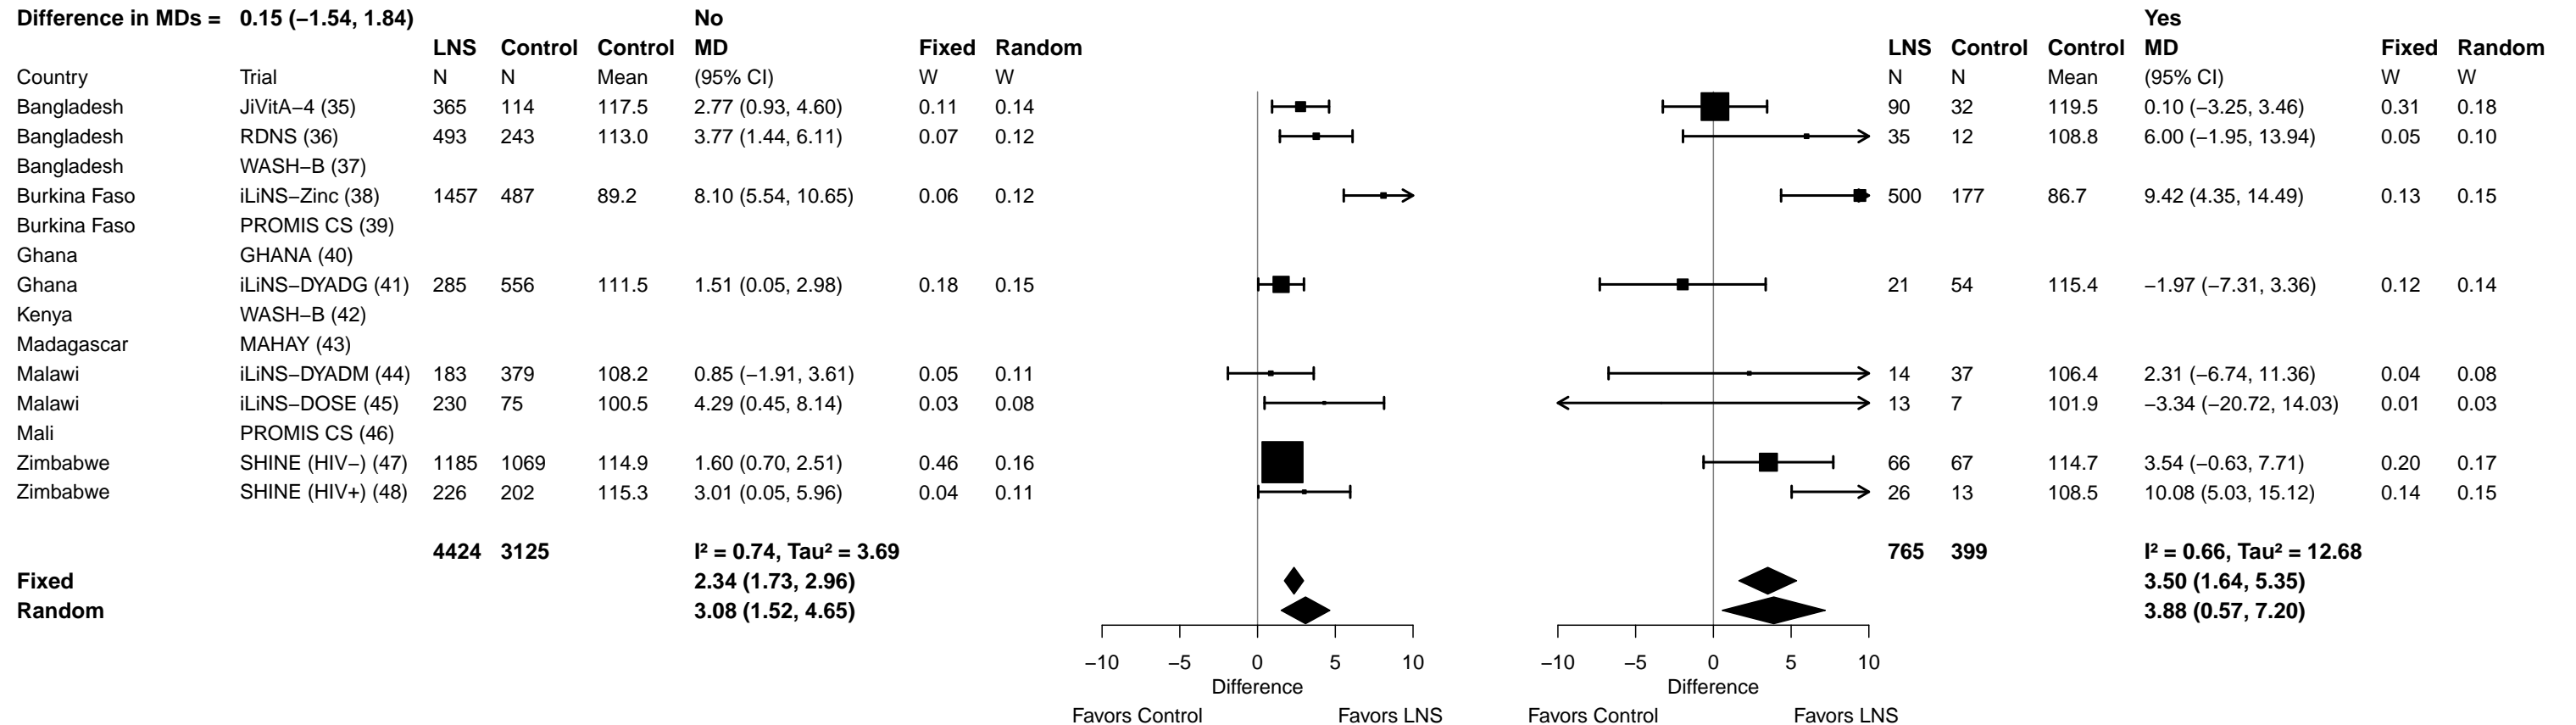

Supplemental figure 6A: Mean difference in hemoglobin concentration

6A7: Stratified by Child baseline anemia

P-for-interaction = 0.063

Difference in MDs = 1.84 (-0.10, 3.79)

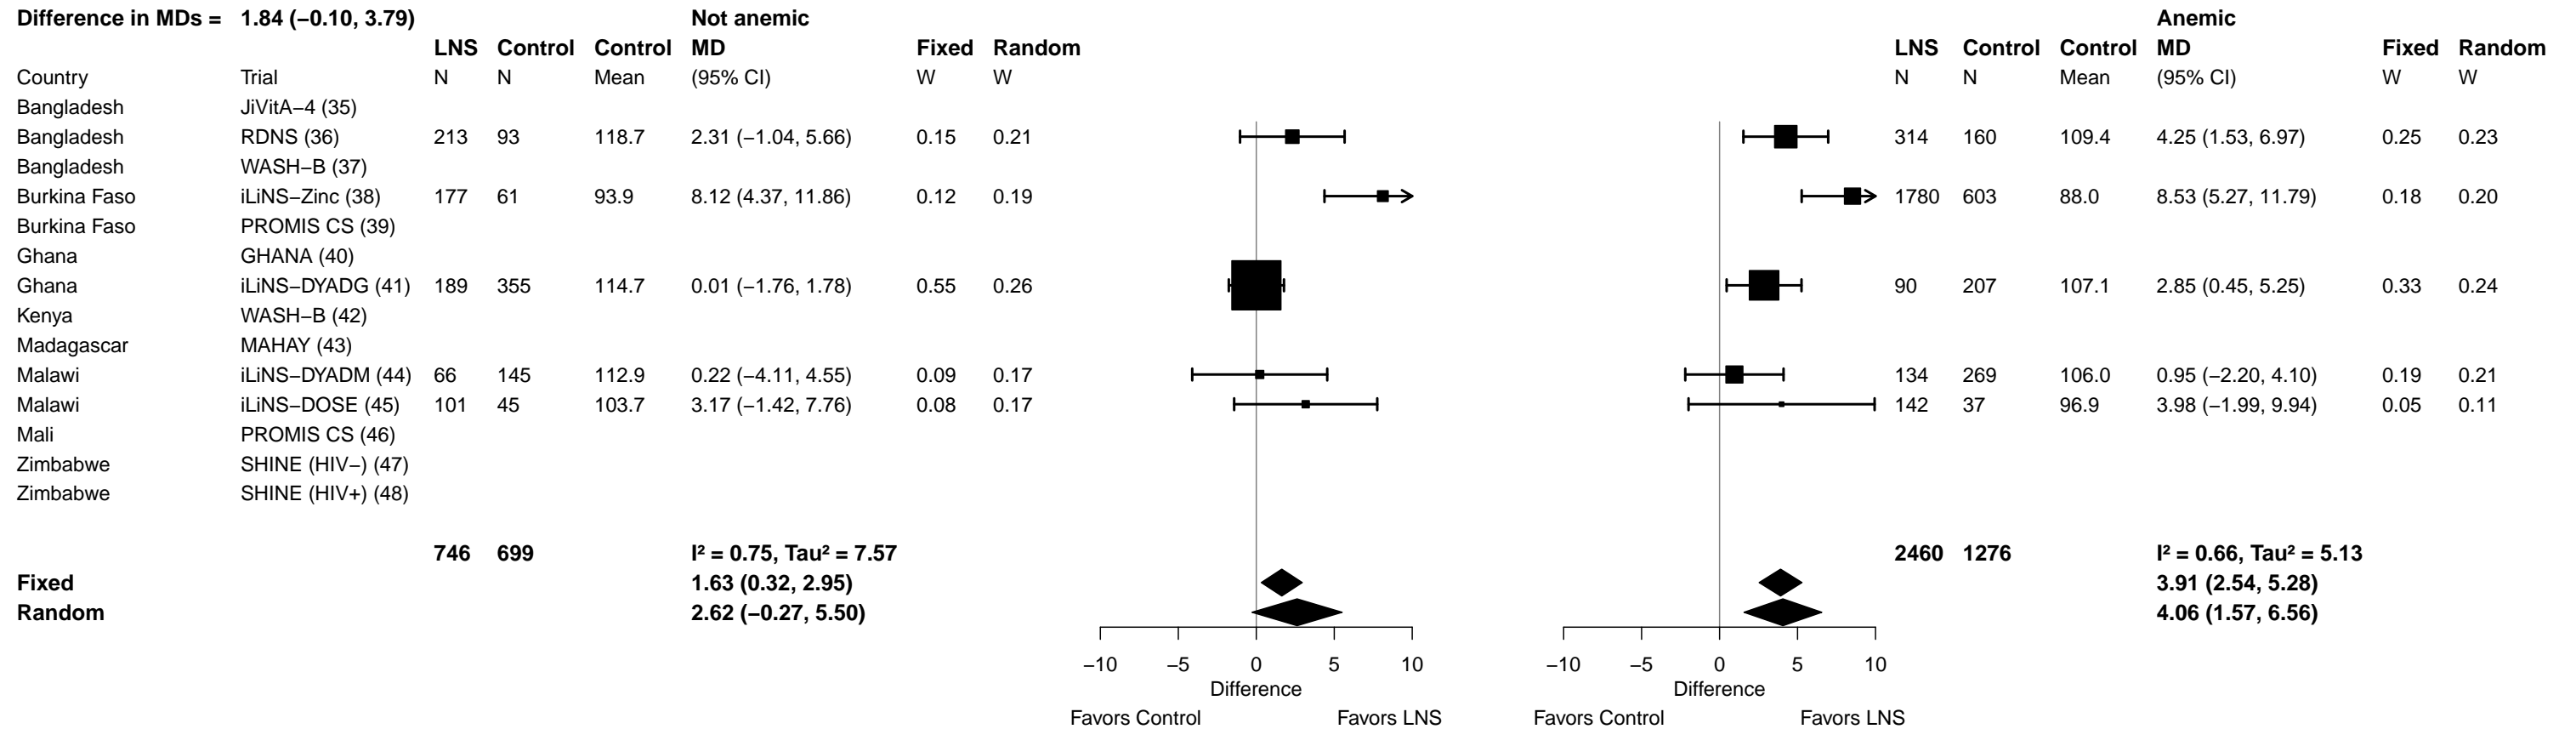

Supplemental figure 6A: Mean difference in hemoglobin concentration

6A8: Stratified by Child high-dose vitamin A supplementation

P-for-interaction = 0.808

Difference in MDs = 0.15 (-1.03, 1.33)

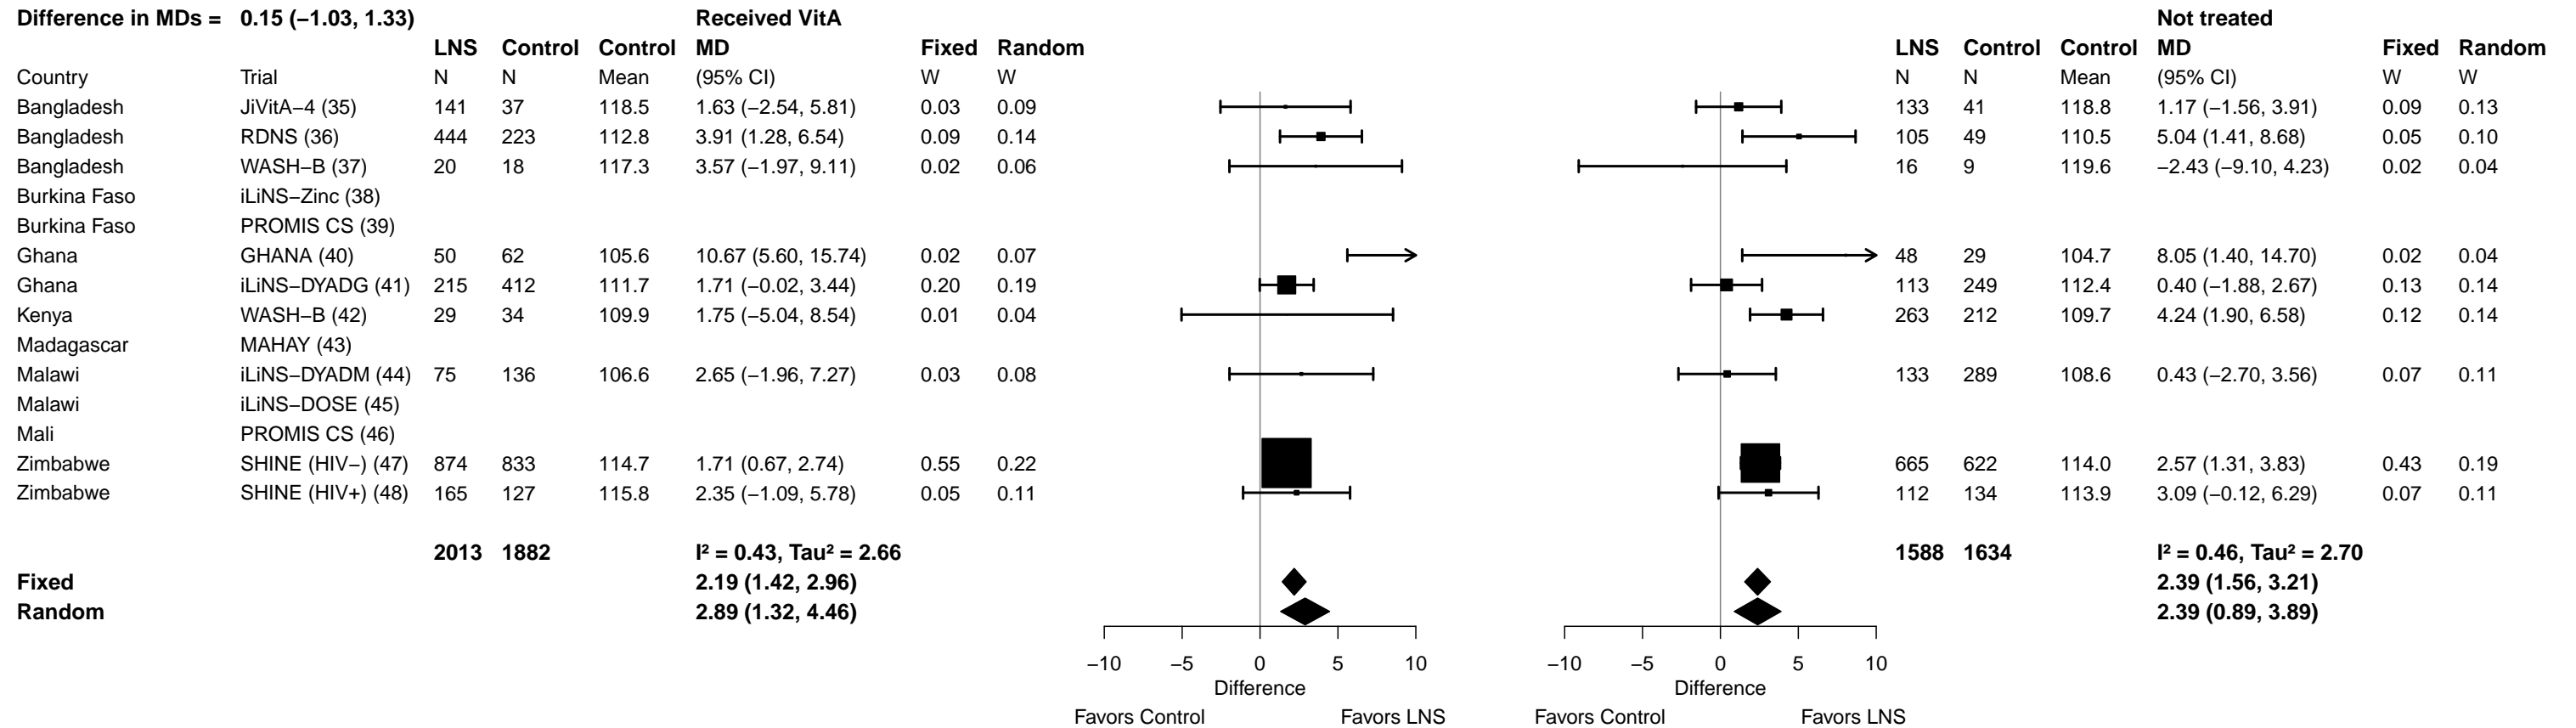

Supplemental figure 6A: Mean difference in hemoglobin concentration

6A9: Stratified by Child inflammation

P-for-interaction = 0.712  
 Difference in MDs = -0.25 (-1.59, 1.09)

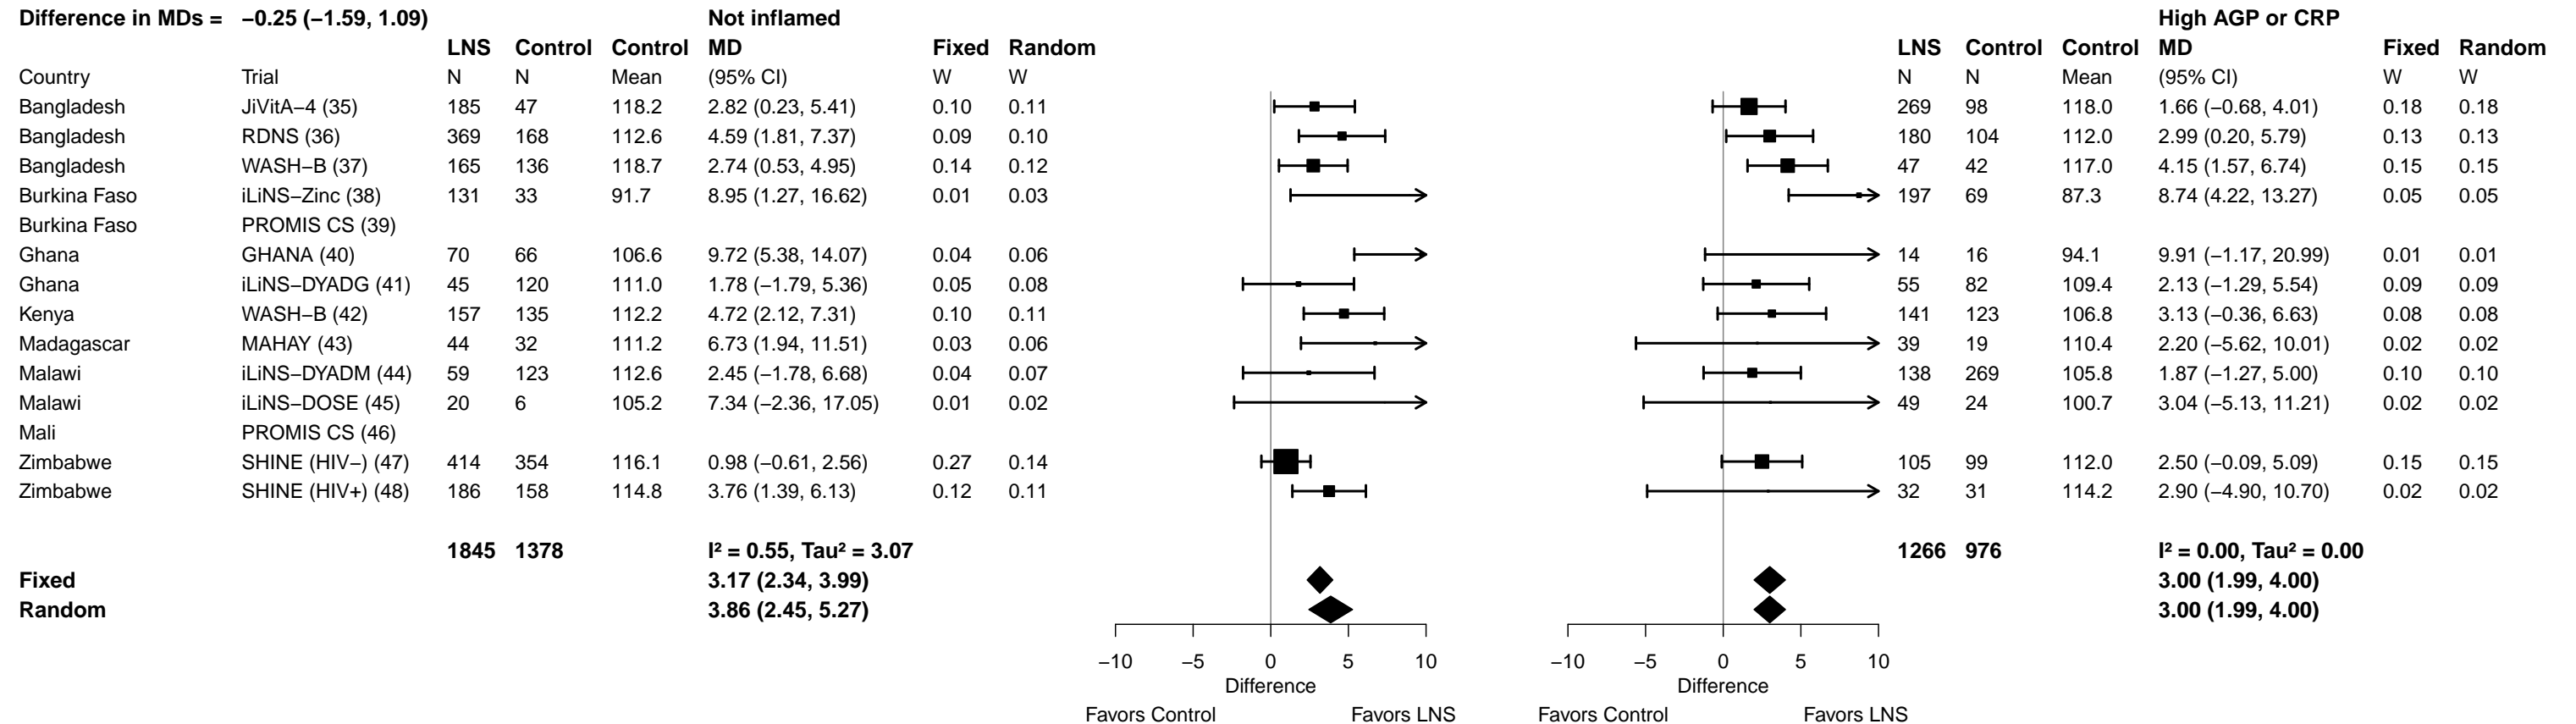

### Supplemental figure 6B: Anemia prevalence ratio

#### 6B1: Stratified by Maternal BMI

**P-for-interaction = 0.637**

**Ratio of PRs = 1.01 (0.97, 1.06)**

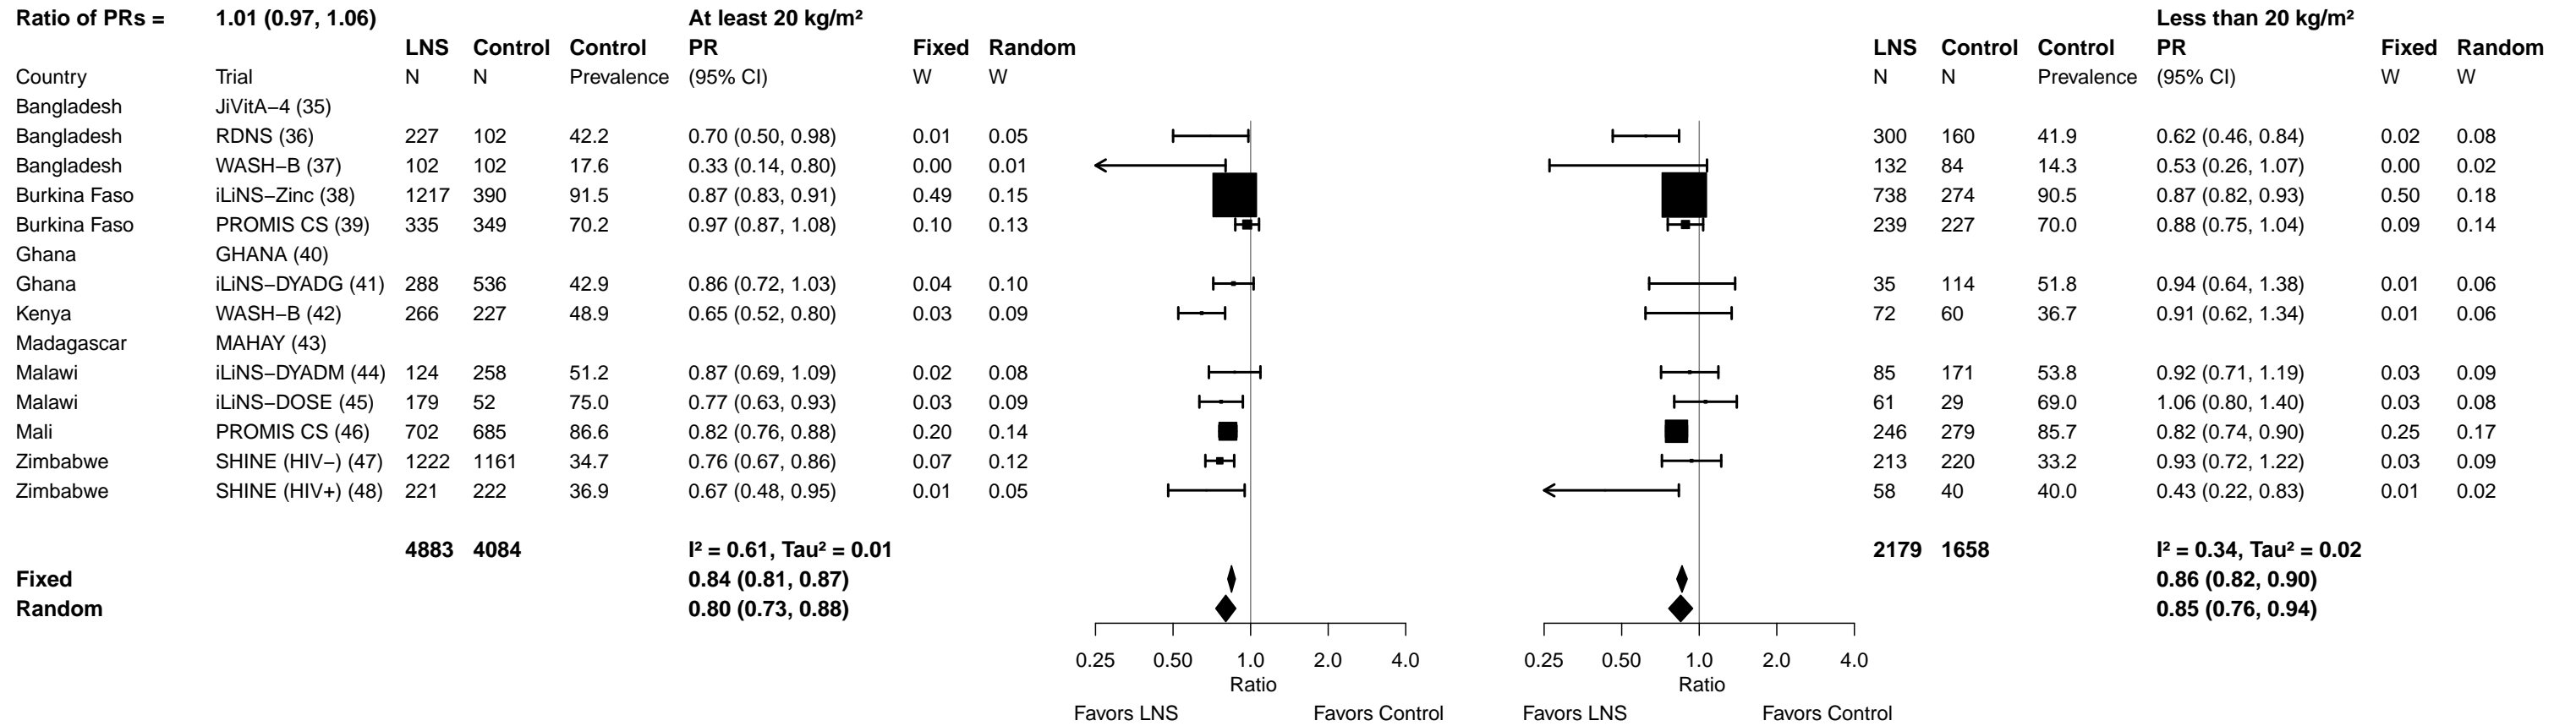

Supplemental figure 6B: Anemia prevalence ratio

6B2: Stratified by Maternal age

P-for-interaction = 0.041

Ratio of PRs = 1.05 (1.00, 1.10)

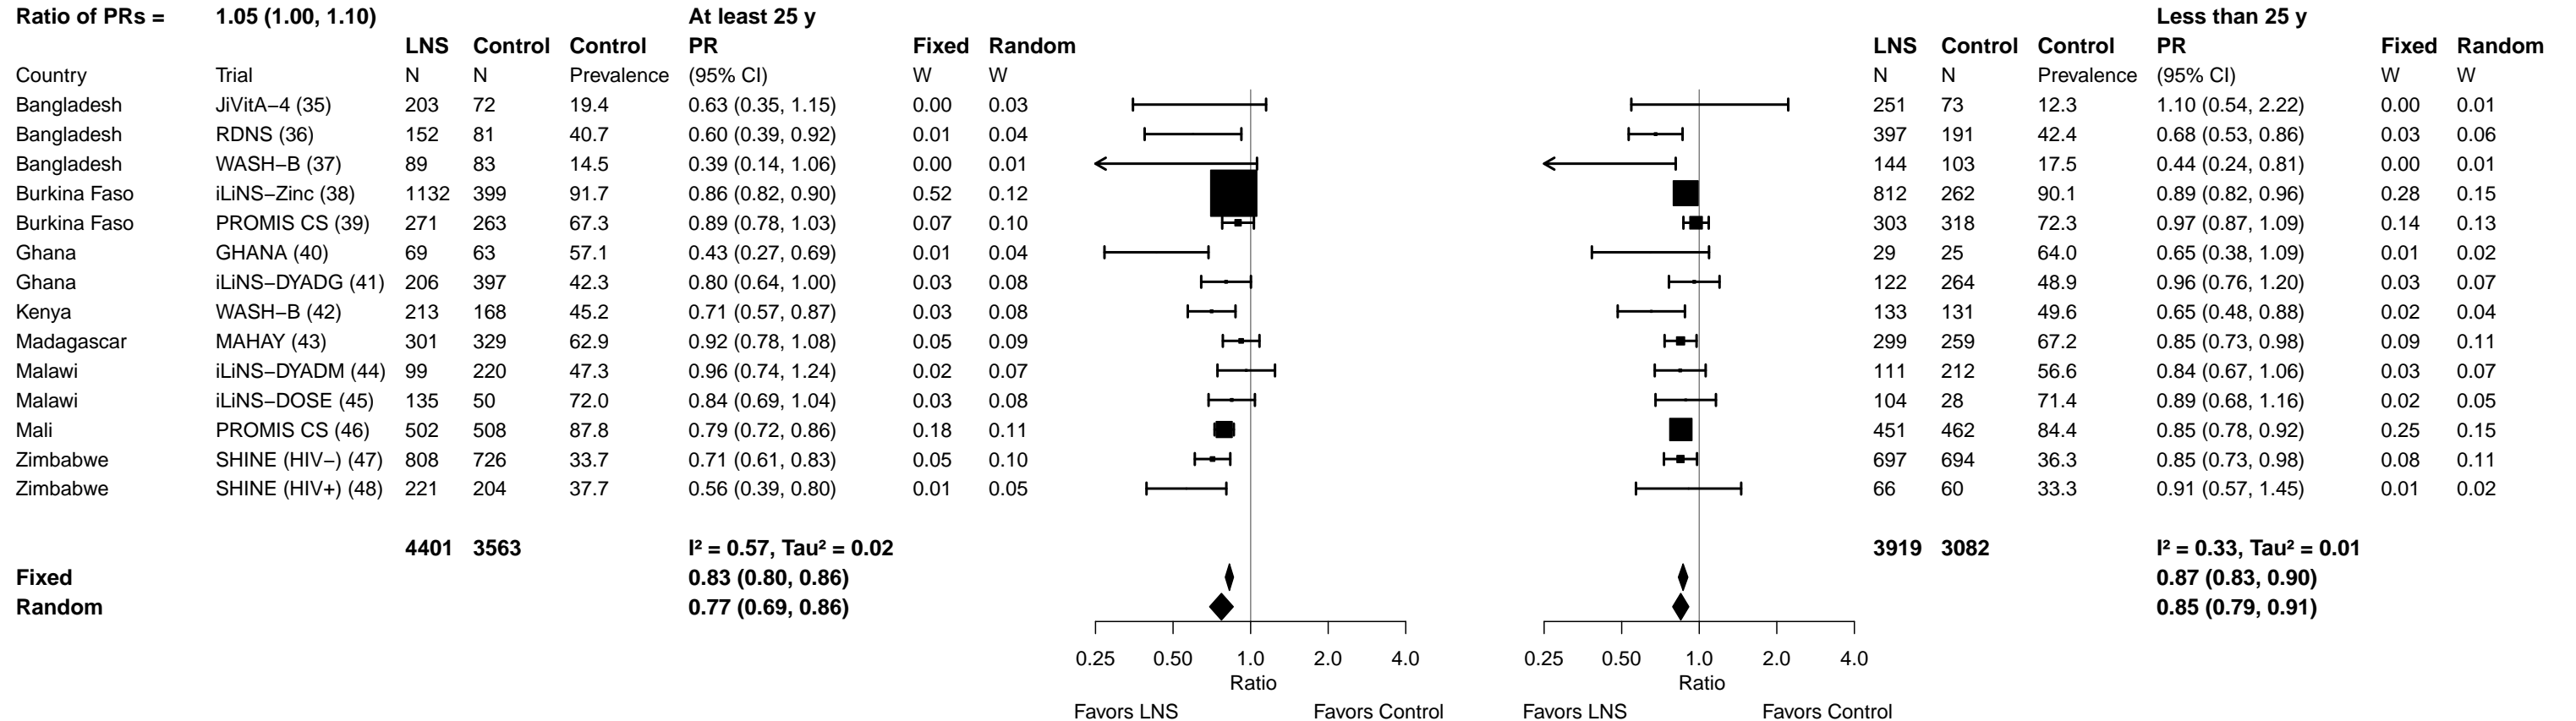



Supplemental figure 6B: Anemia prevalence ratio

6B3: Stratified by Maternal education

P-for-interaction = 0.621

Ratio of PRs = 1.03 (0.93, 1.14)

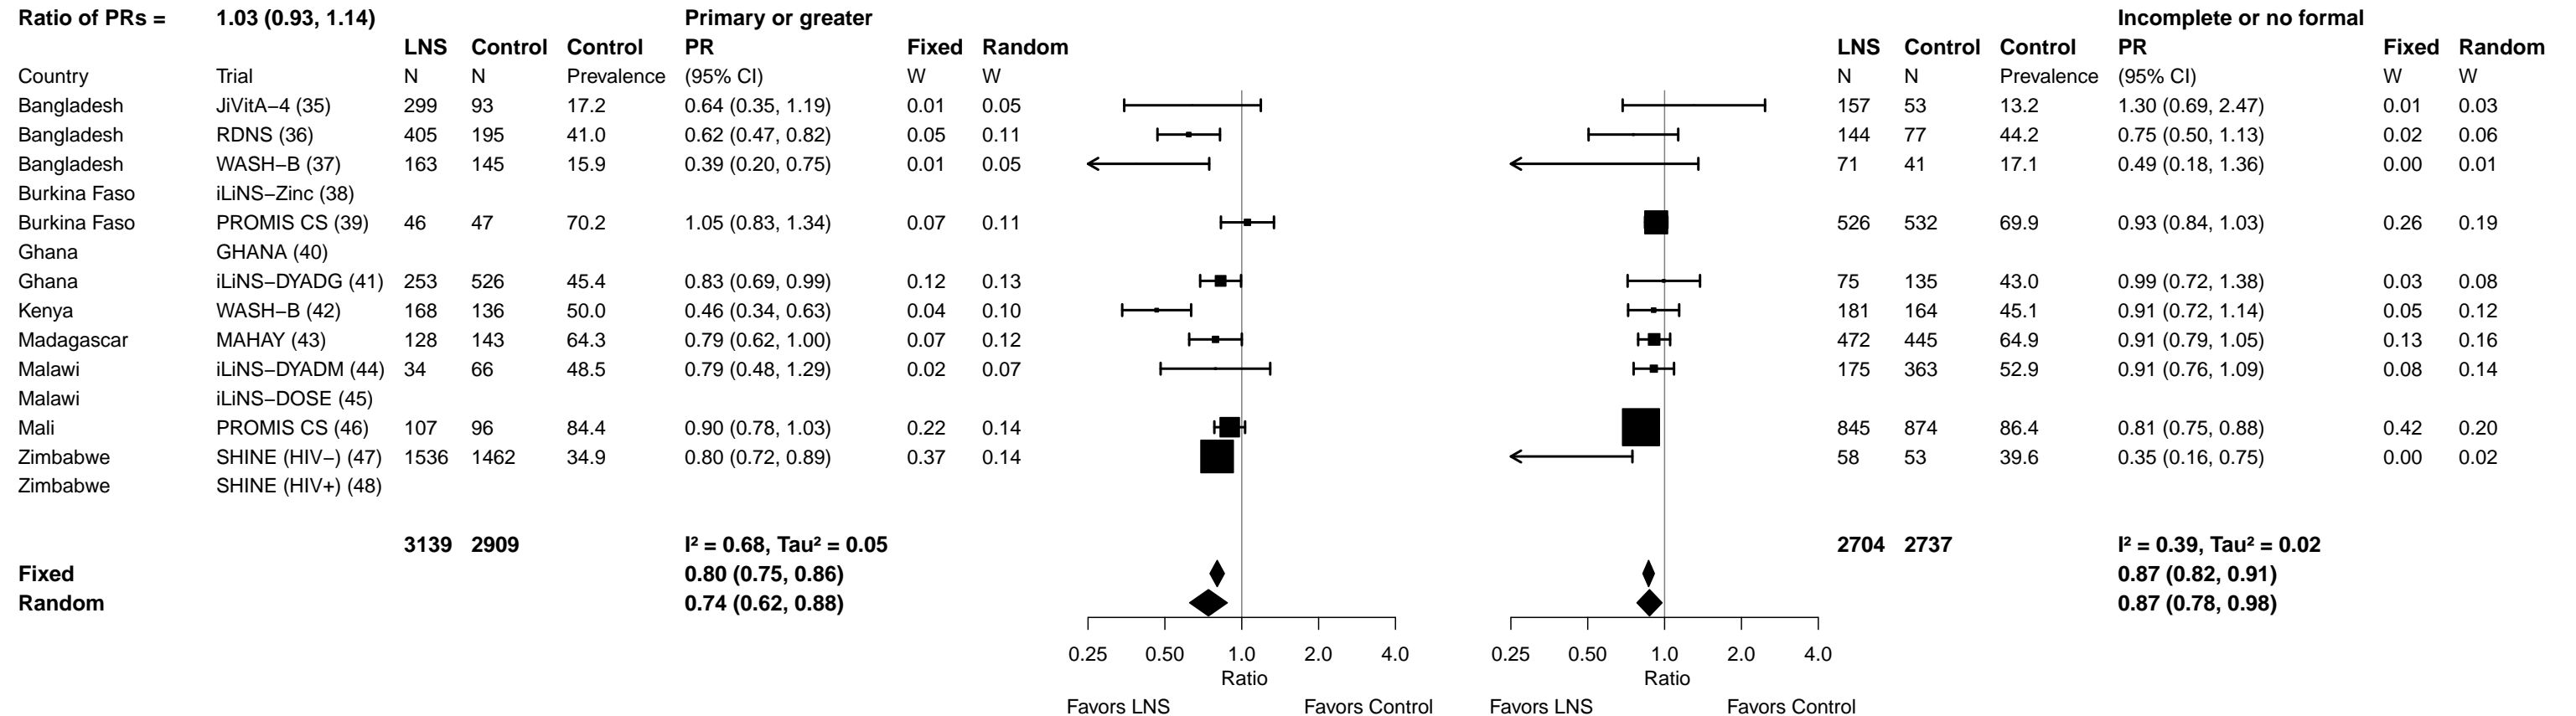

Supplemental figure 6B: Anemia prevalence ratio

6B4: Stratified by Child sex

P-for-interaction = 0.039

Ratio of PRs = 0.96 (0.92, 1.00)

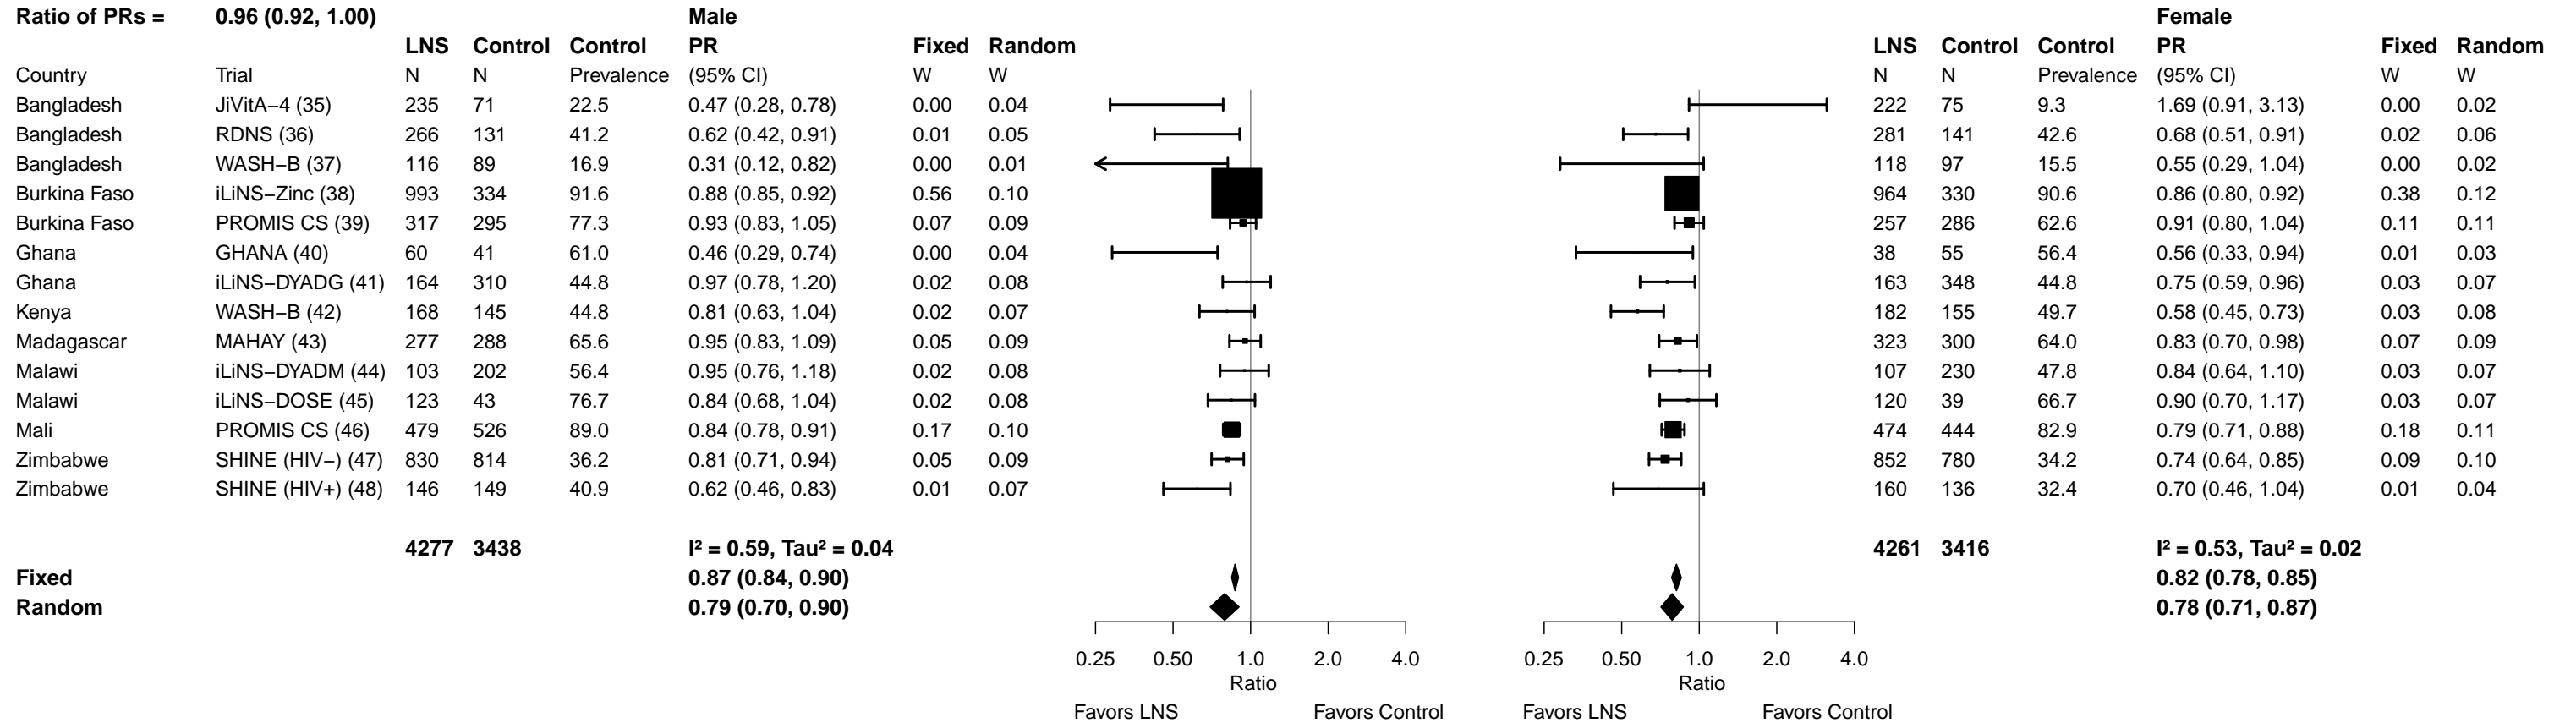

Supplemental figure 6B: Anemia prevalence ratio

6B5: Stratified by Child birth order

P-for-interaction = 0.156

Ratio of PRs = 1.04 (0.99, 1.09)

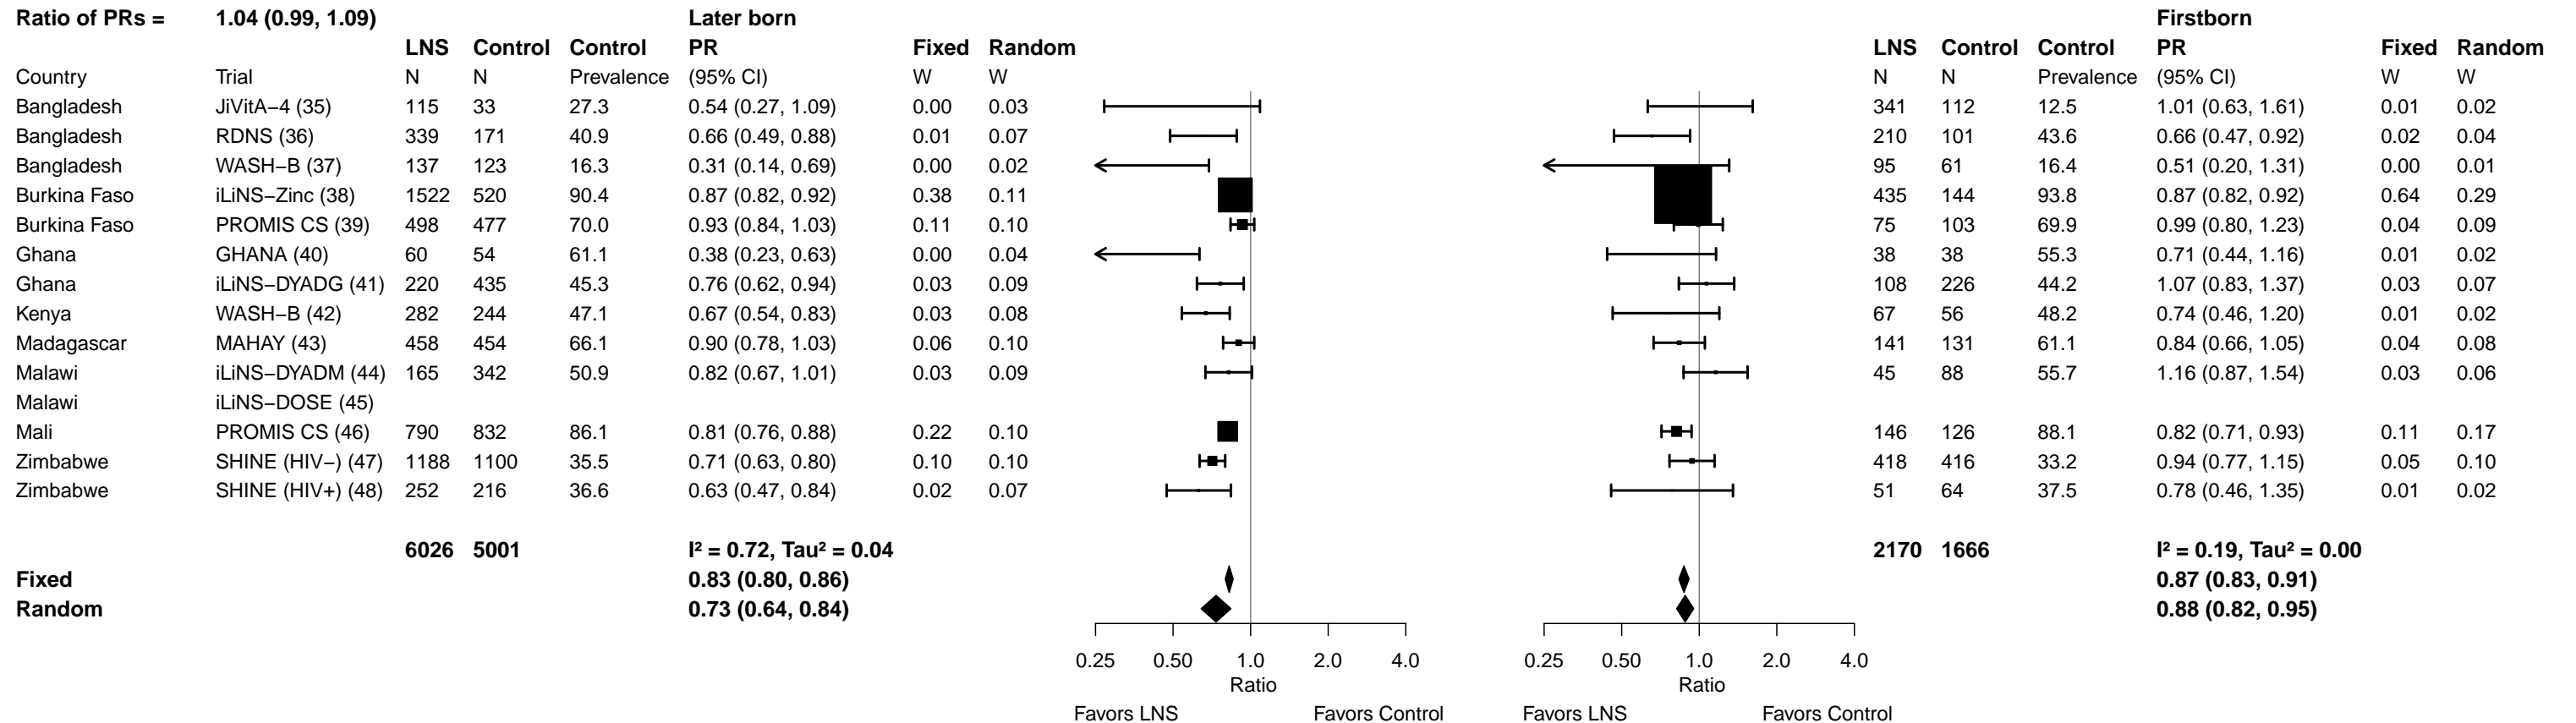

Supplemental figure 6B: Anemia prevalence ratio

6B6: Stratified by Child baseline acute malnutrition

P-for-interaction = 0.393

Ratio of PRs = 0.98 (0.93, 1.03)

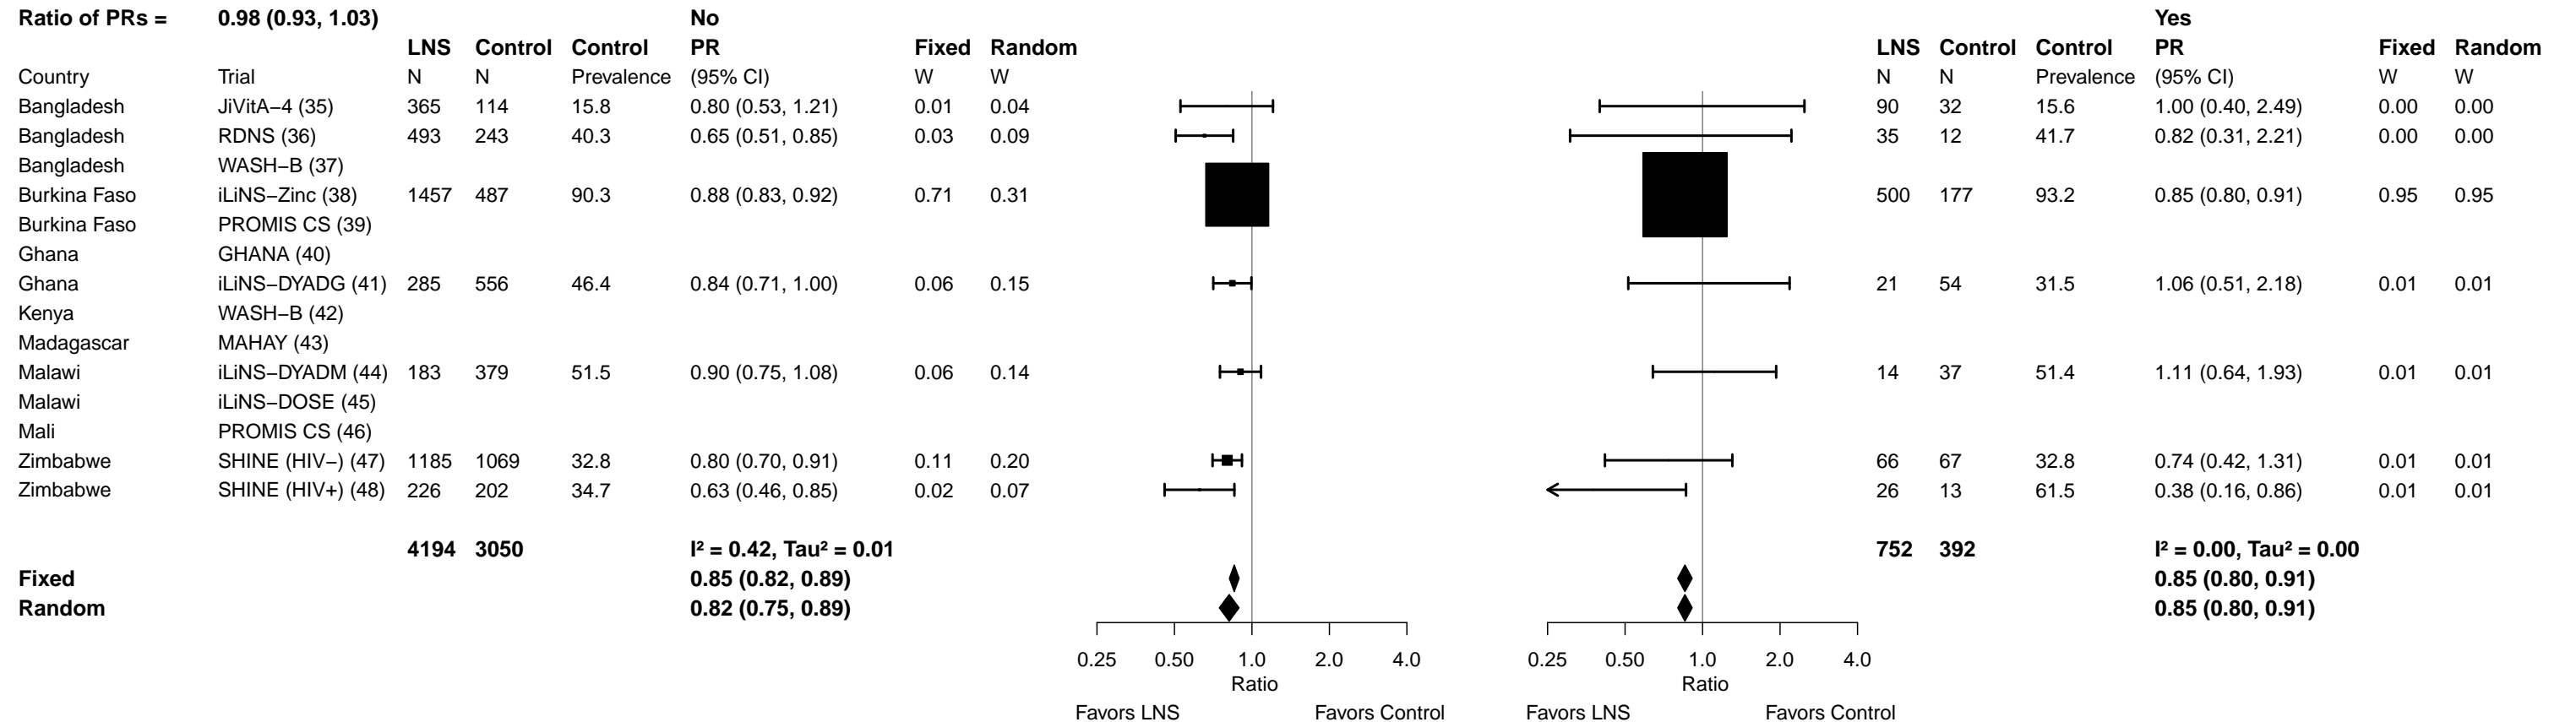

Supplemental figure 6B: Anemia prevalence ratio

6B7: Stratified by Child baseline anemia

P-for-interaction = 0.683

Ratio of PRs = 1.03 (0.91, 1.16)

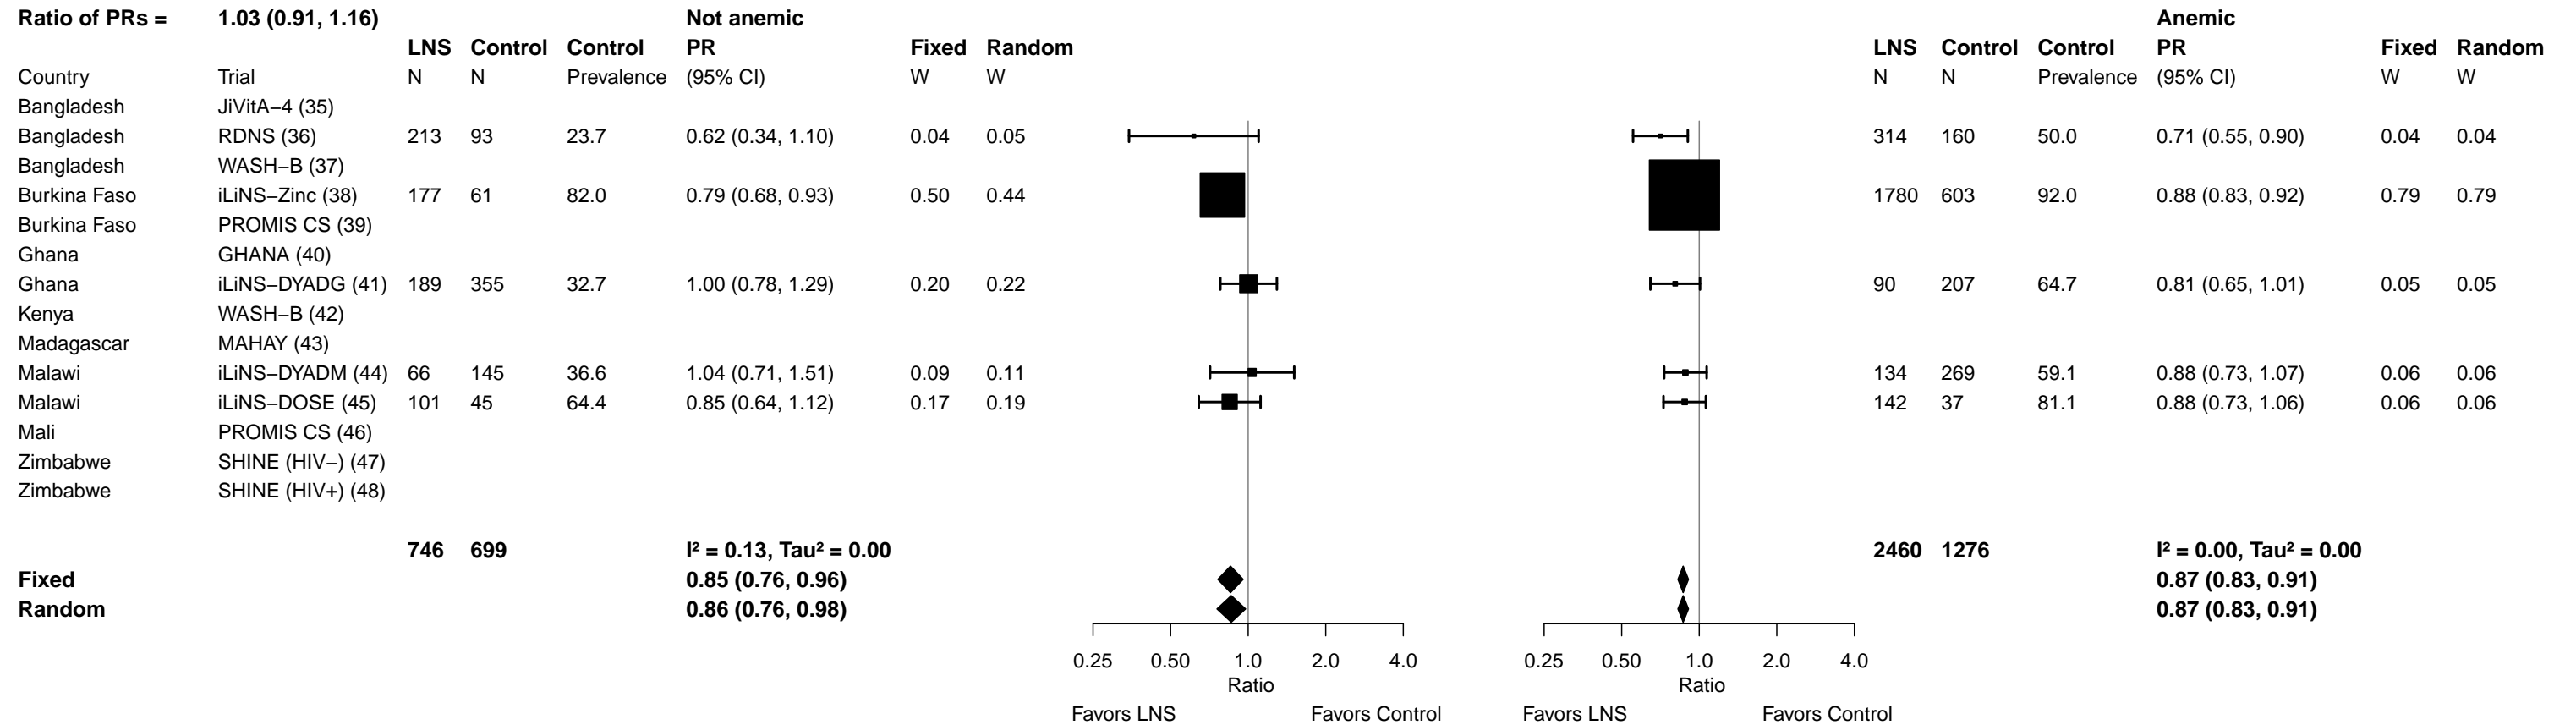

Supplemental figure 6B: Anemia prevalence ratio

6B8: Stratified by Child high-dose vitamin A supplementation

P-for-interaction = 0.760

Ratio of PRs = 0.98 (0.85, 1.12)

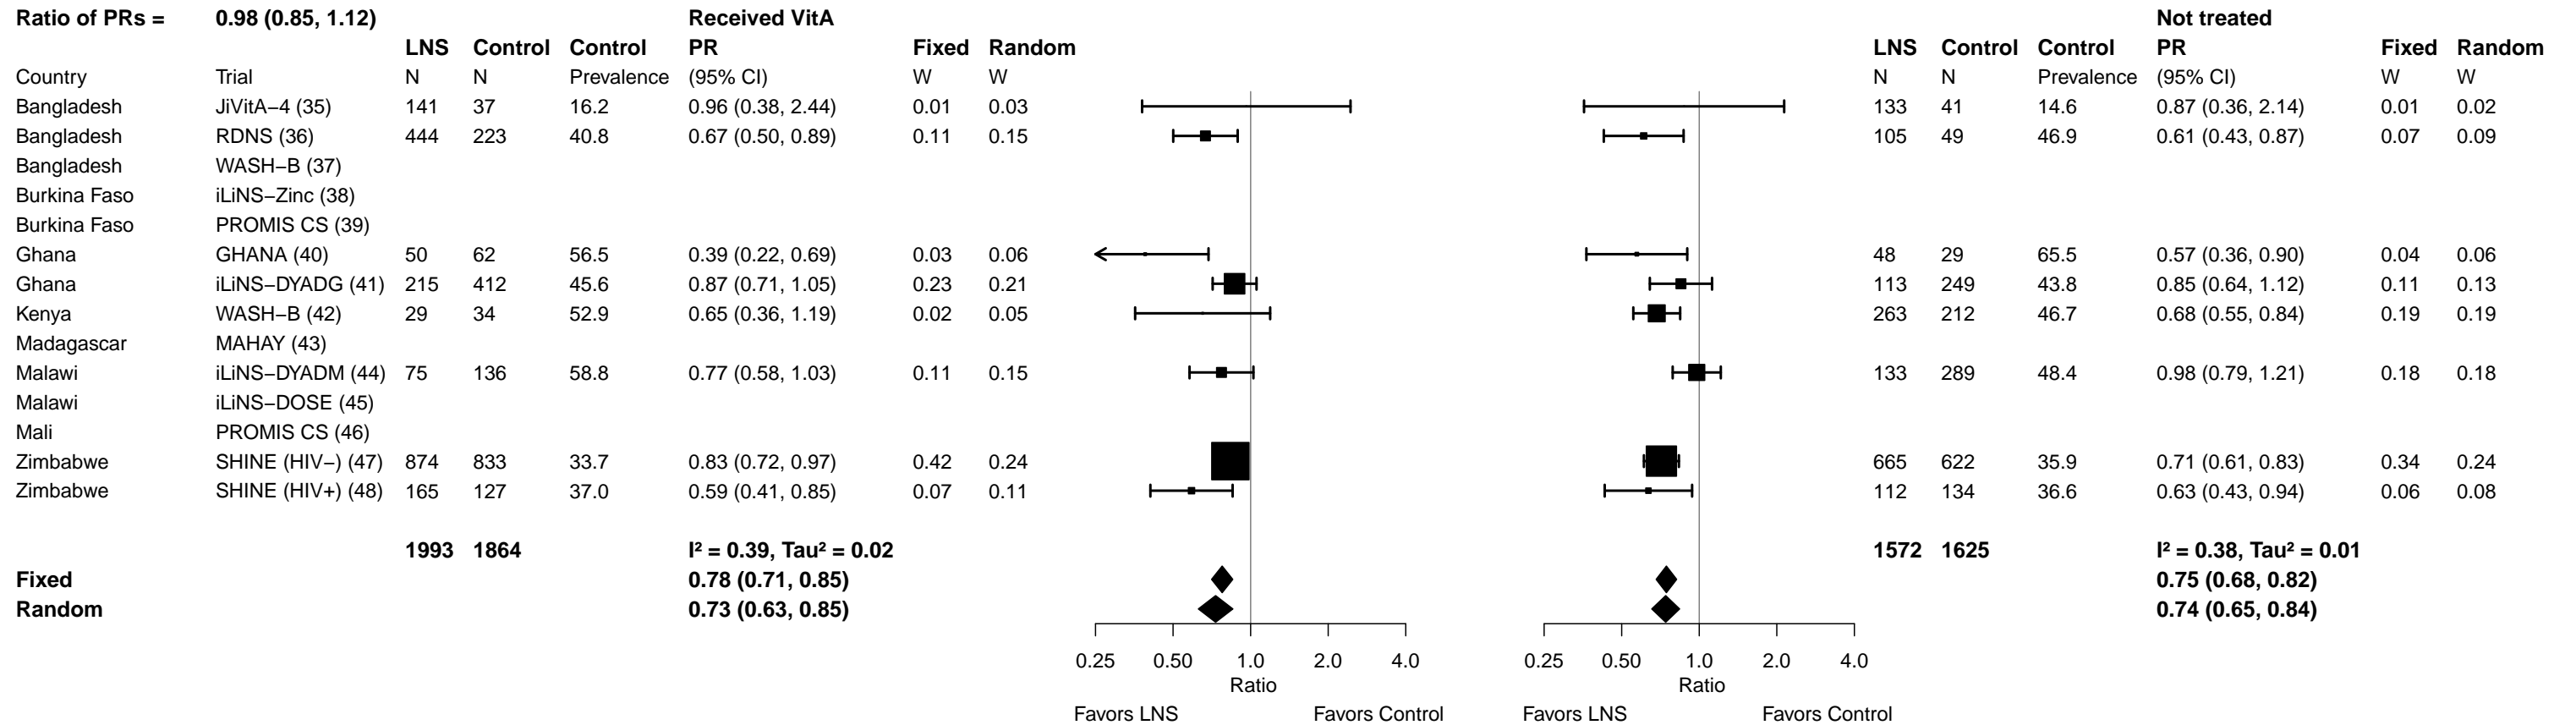

Supplemental figure 6B: Anemia prevalence ratio

6B9: Stratified by Child inflammation

P-for-interaction = 0.006

Ratio of PRs = 1.30 (1.08, 1.57)

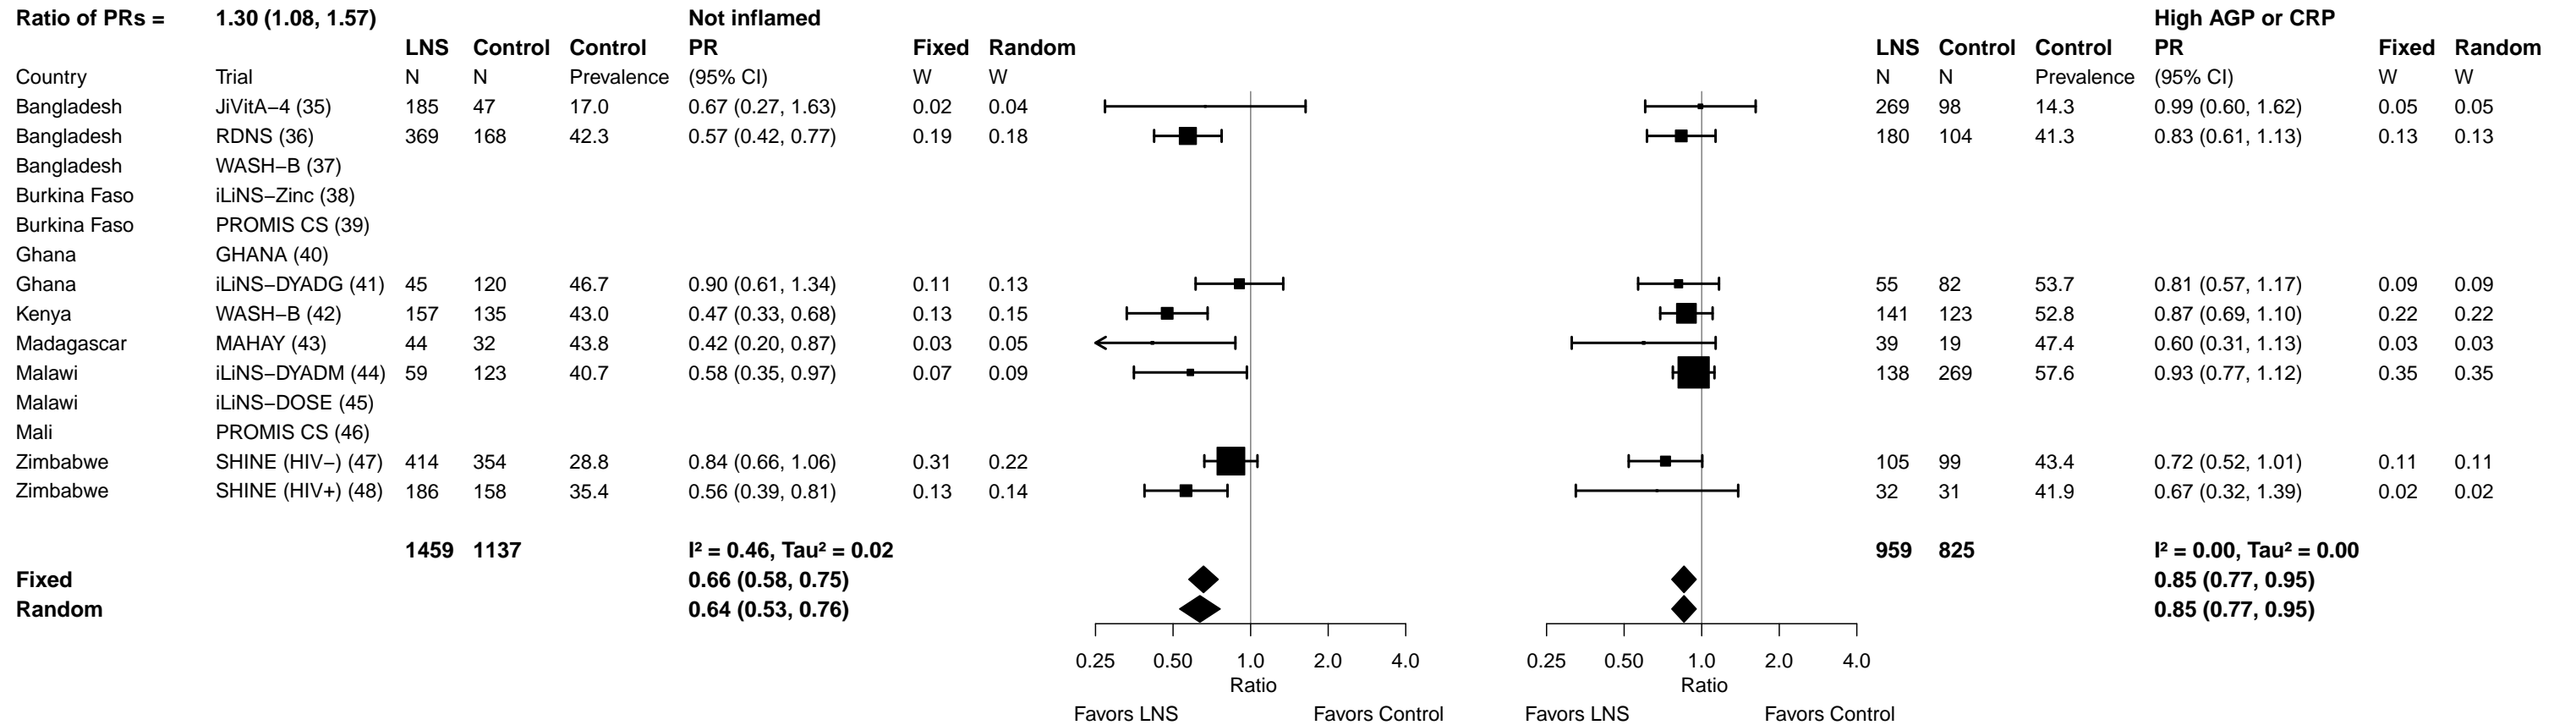

### Supplemental figure 6C: Anemia prevalence difference

#### 6C1: Stratified by Maternal BMI

P-for-interaction = 0.397

Difference in PDs = 0.01 (-0.02, 0.05)

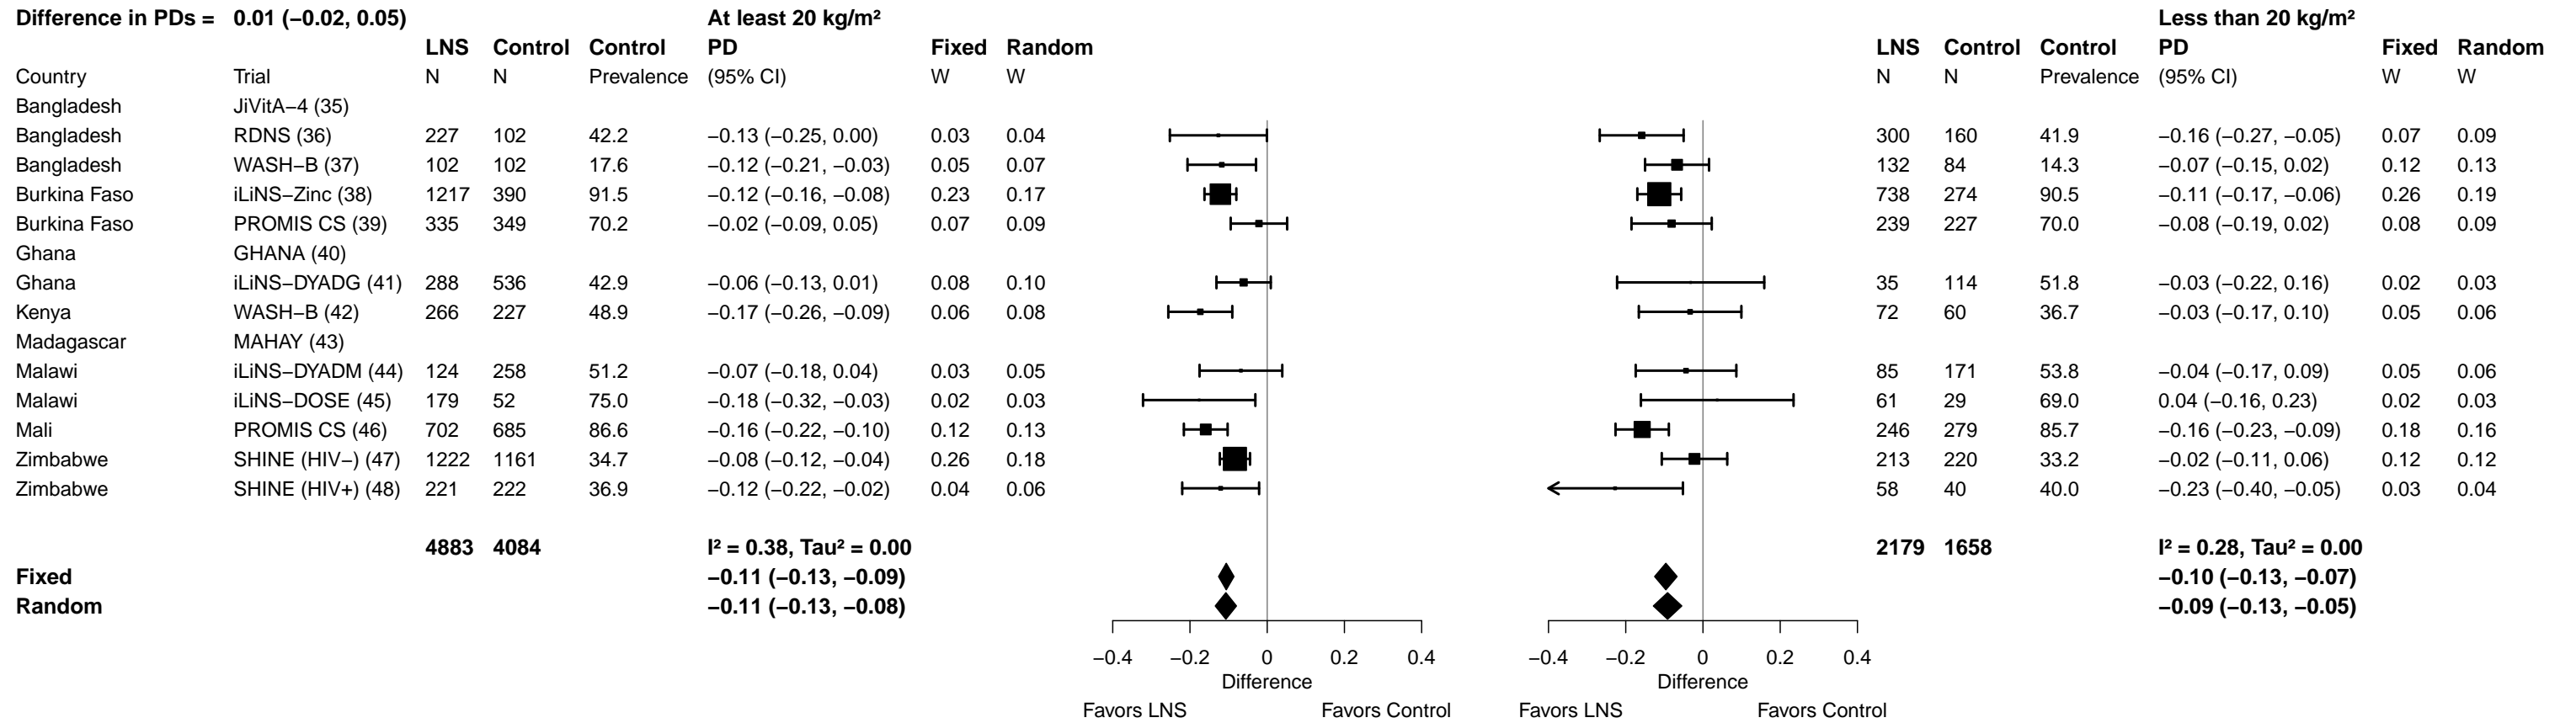



Supplemental figure 6C: Anemia prevalence difference

6C2: Stratified by Maternal age

**P-for-interaction = 0.035**  
**Difference in PDs = 0.03 (0.00, 0.06)**

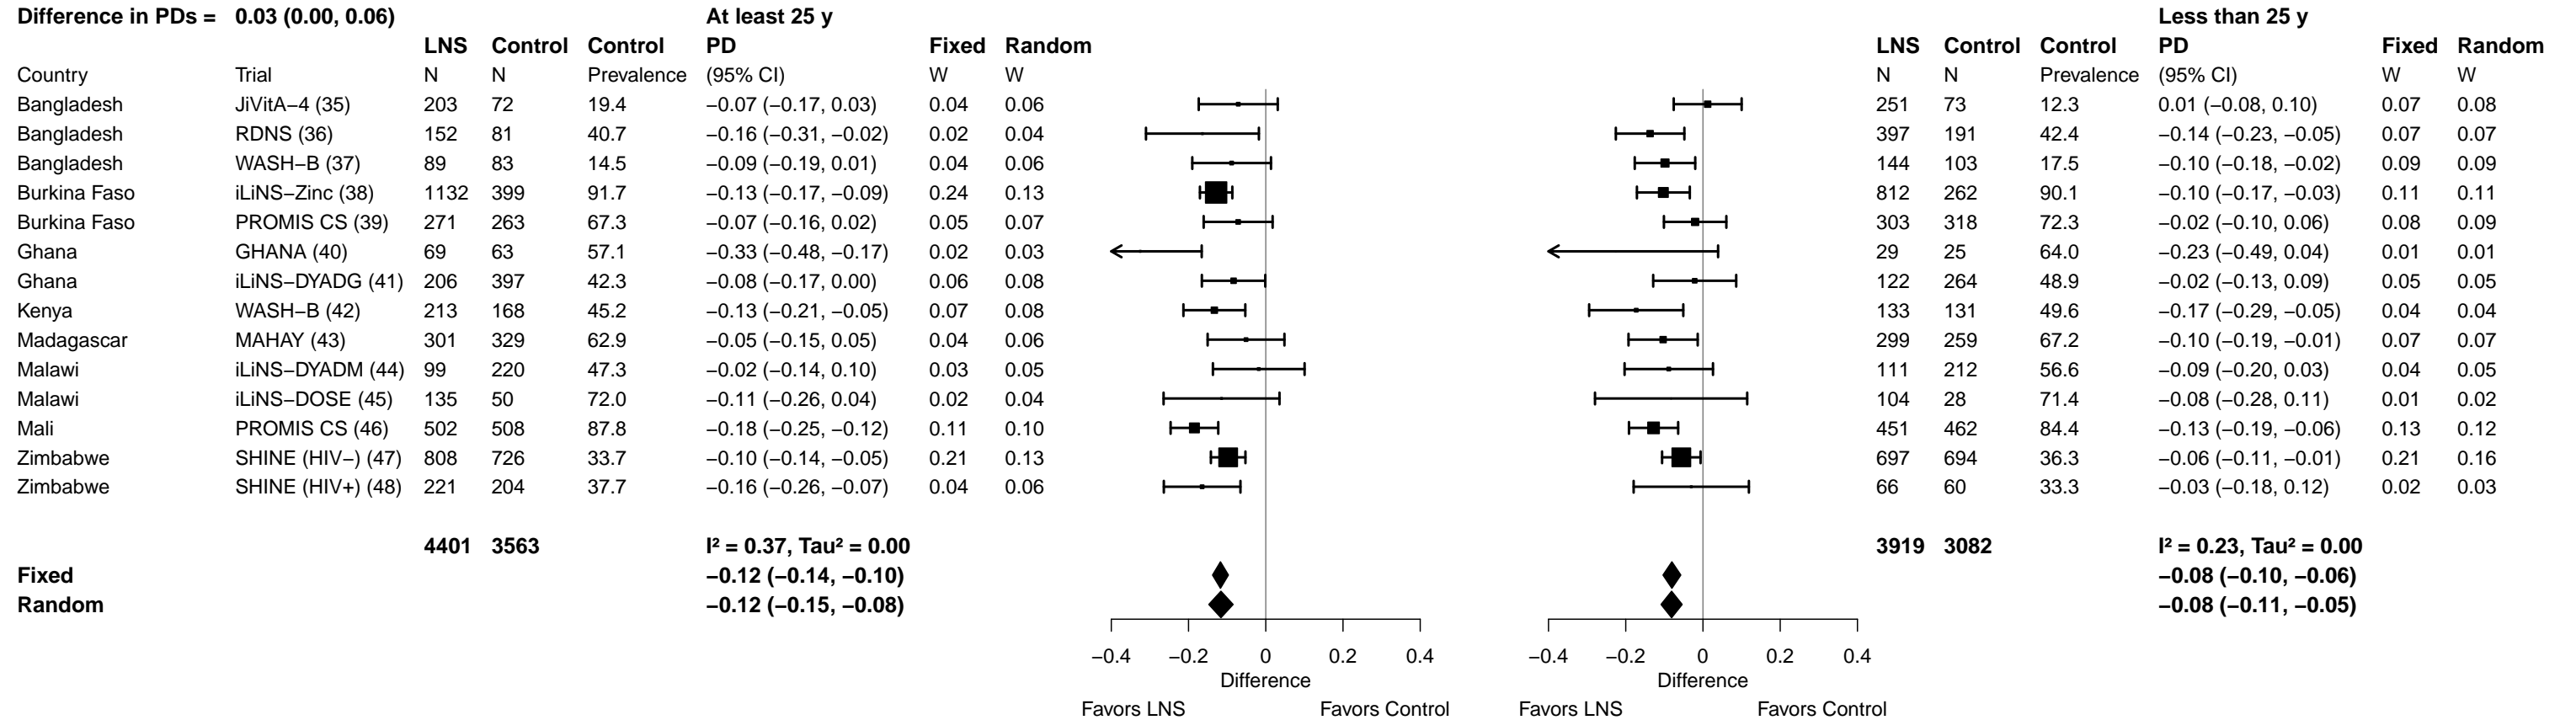

Supplemental figure 6C: Anemia prevalence difference

6C3: Stratified by Maternal education

P-for-interaction = 0.307

Difference in PDs = 0.02 (-0.02, 0.07)

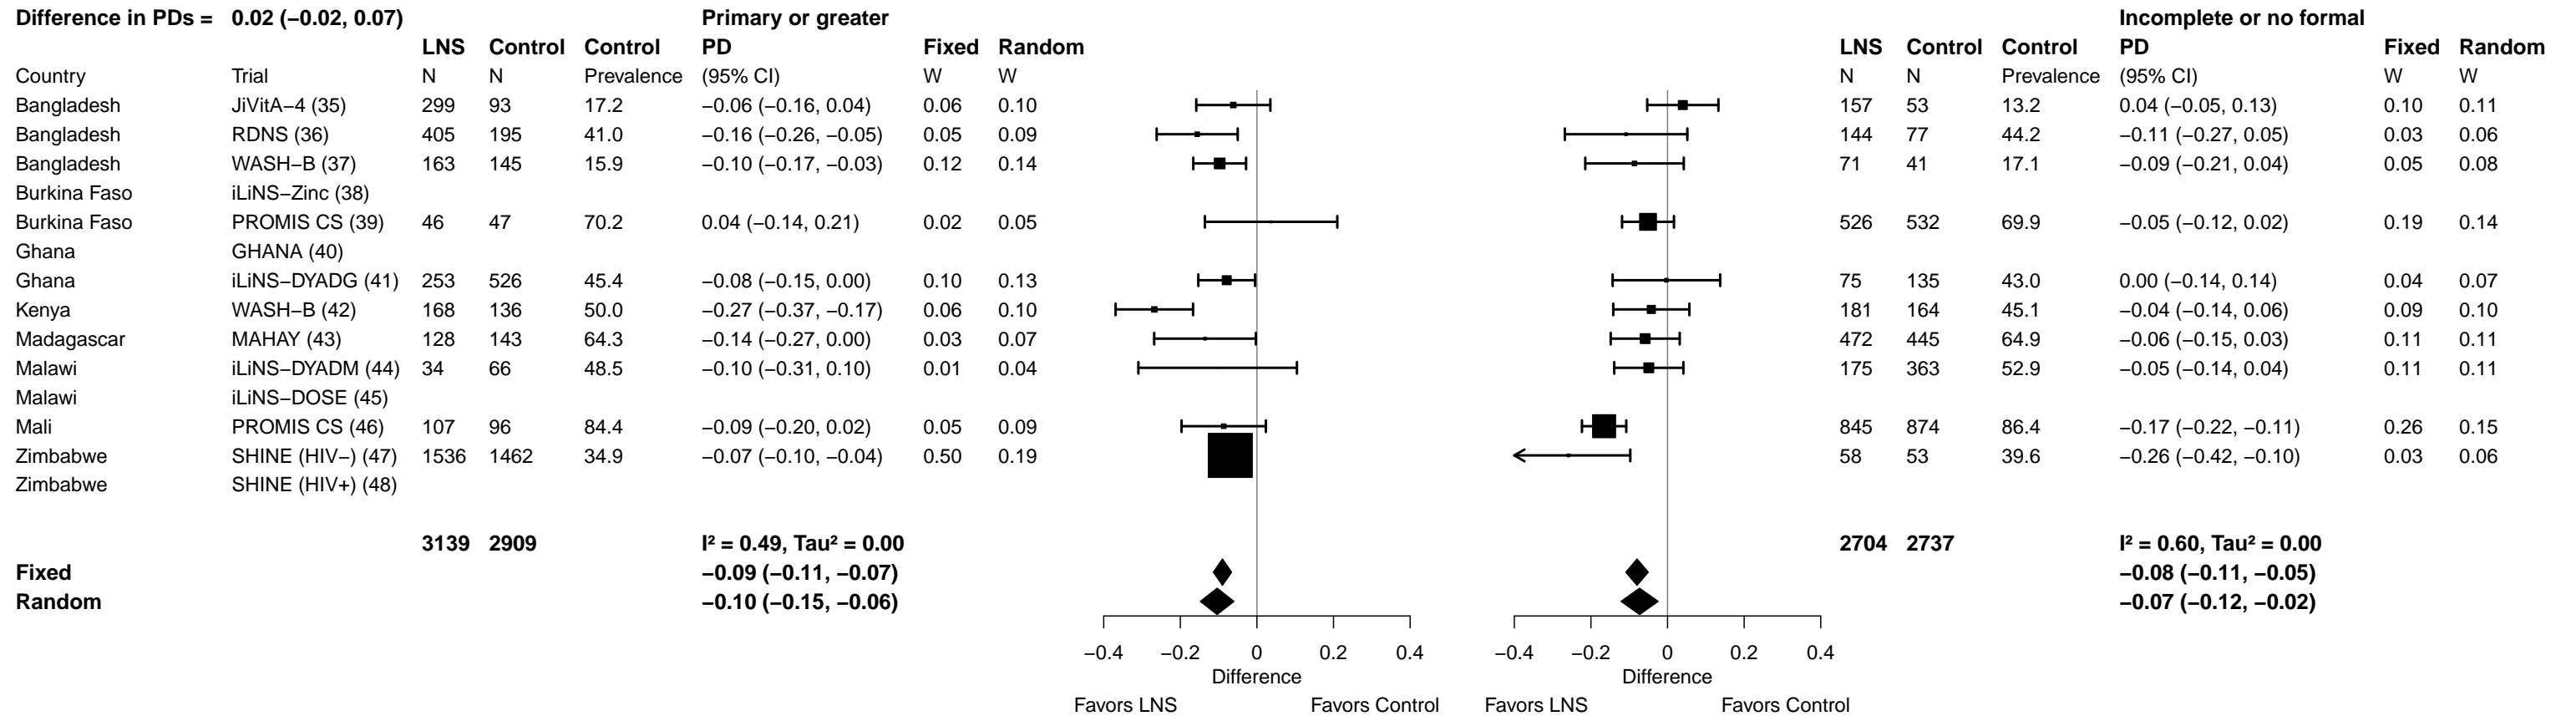

Supplemental figure 6C: Anemia prevalence difference

6C4: Stratified by Child sex

P-for-interaction = 0.283

Difference in PDs = -0.02 (-0.04, 0.01)

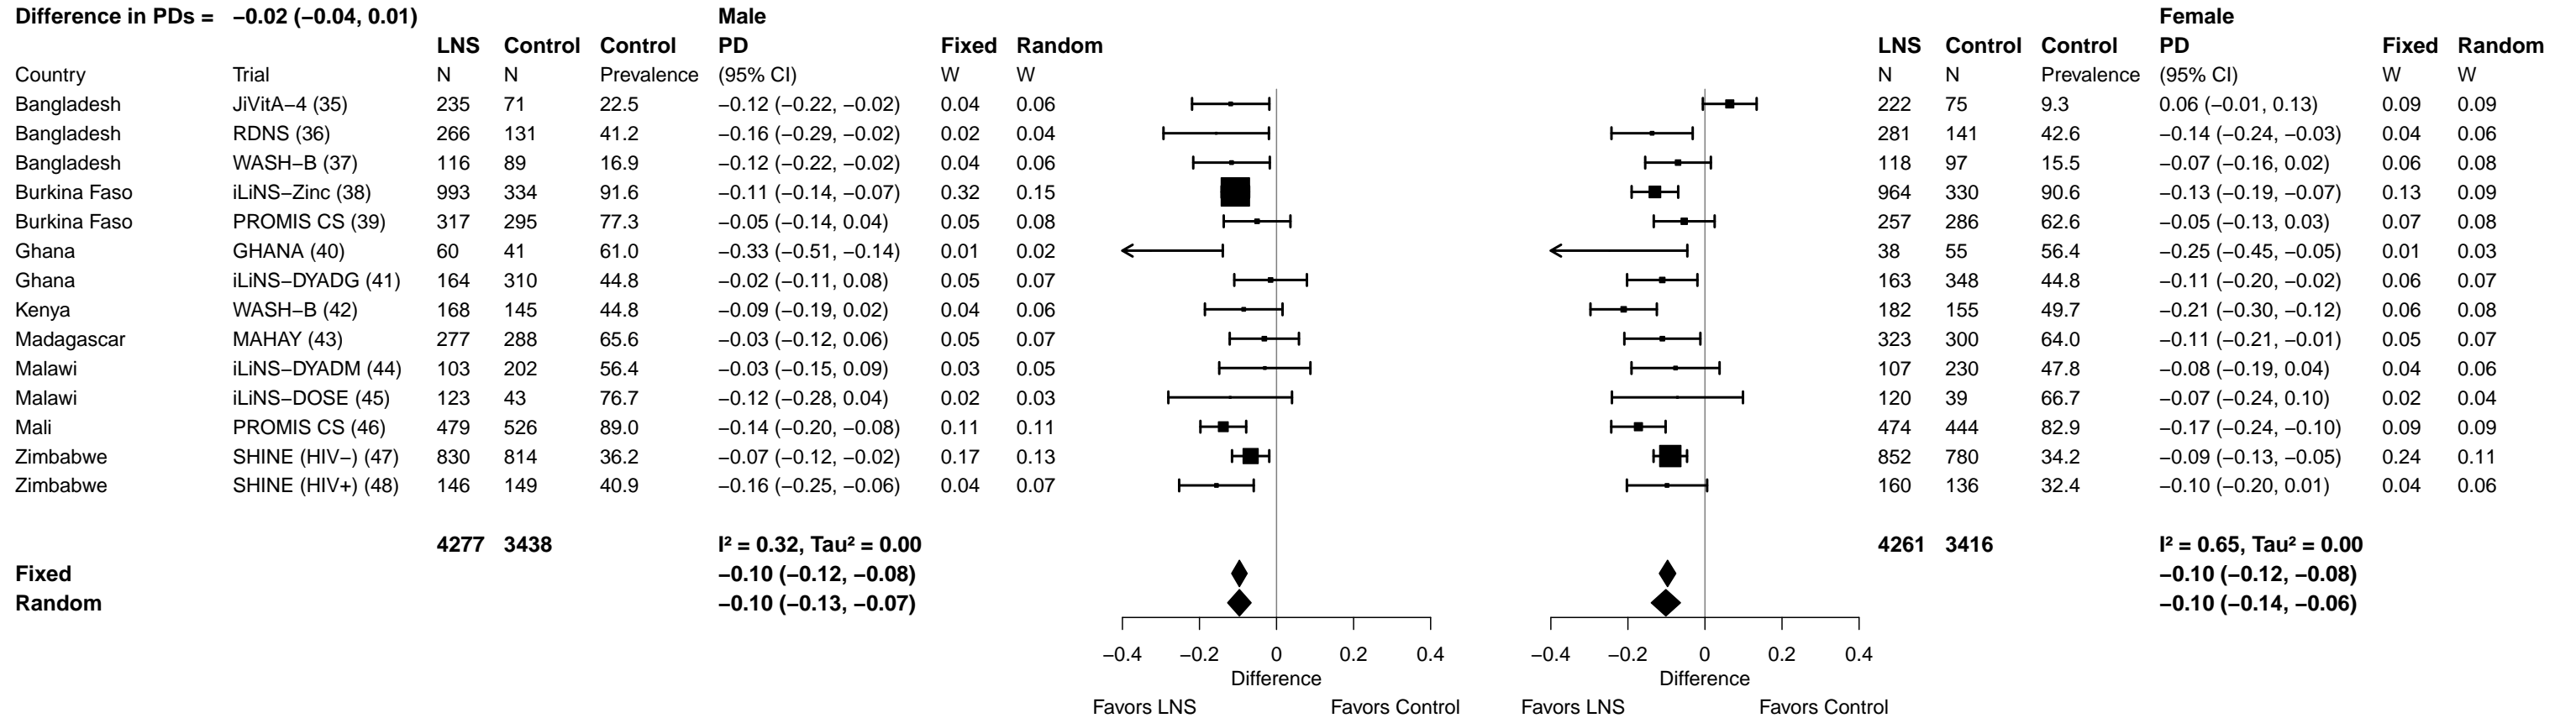

Supplemental figure 6C: Anemia prevalence difference

6C5: Stratified by Child birth order

**P-for-interaction = 0.024**  
**Difference in PDs = 0.04 (0.01, 0.07)**

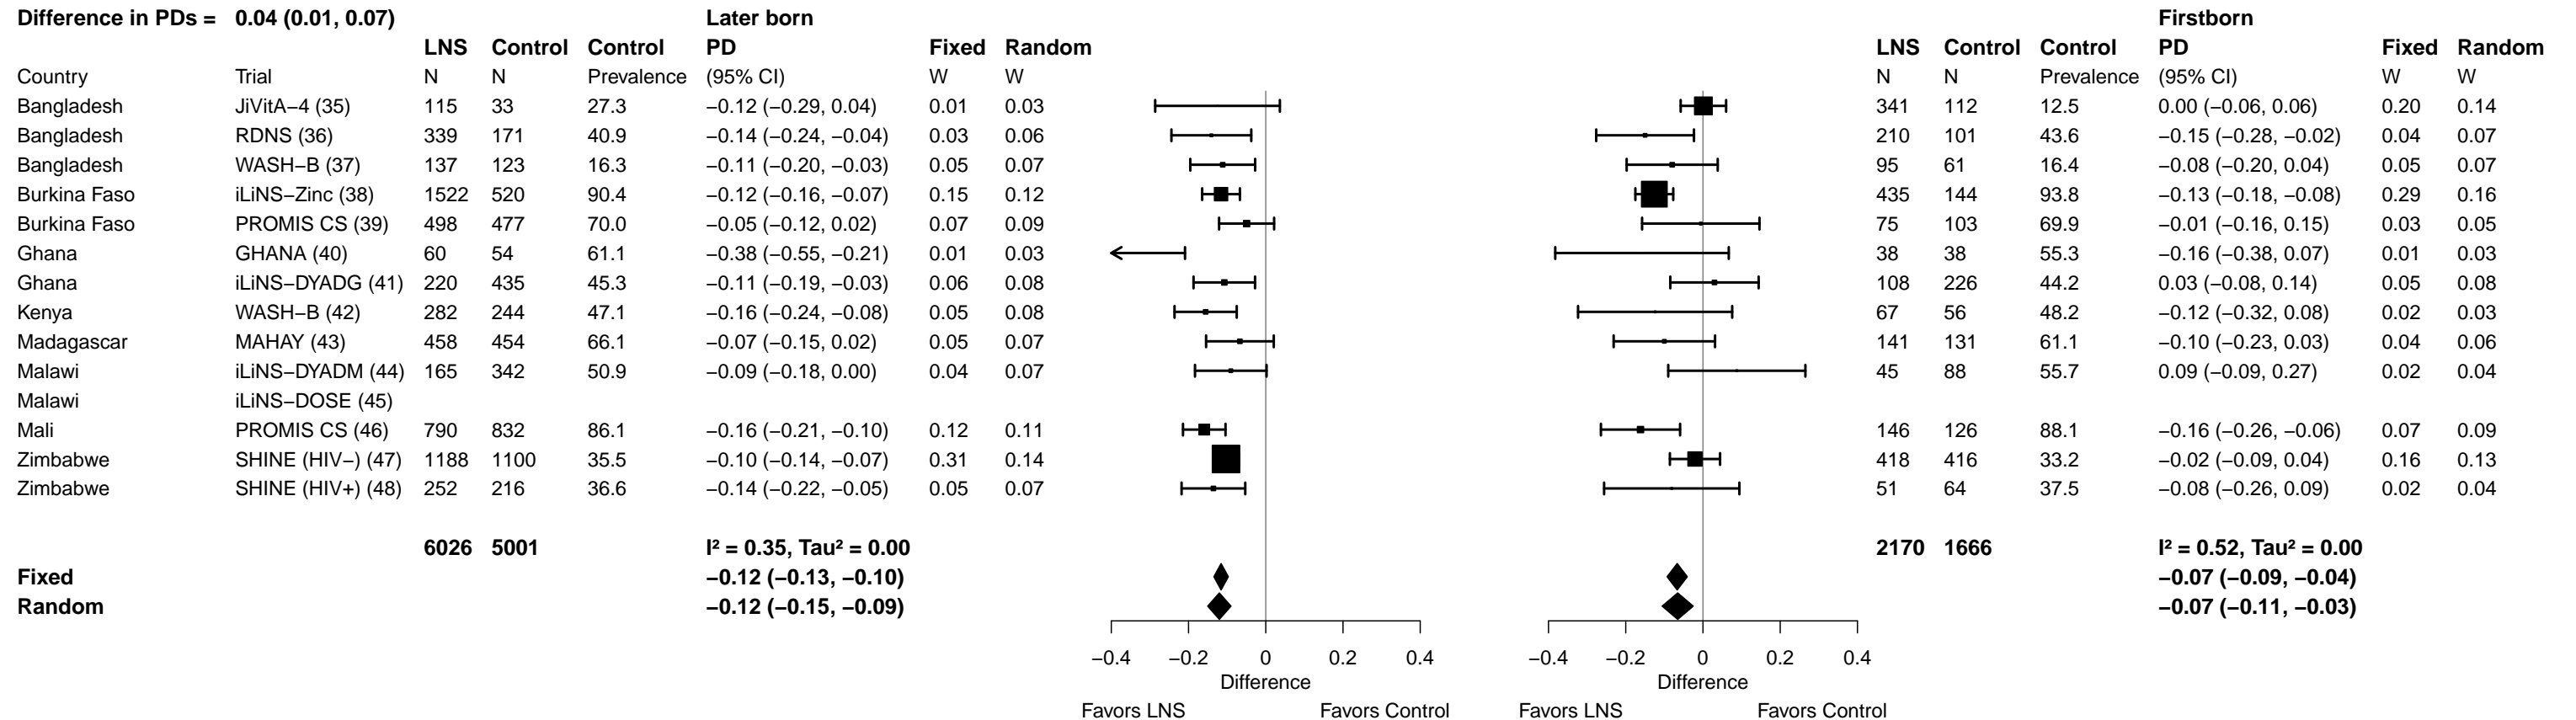

Supplemental figure 6C: Anemia prevalence difference

6C6: Stratified by Child baseline acute malnutrition

P-for-interaction = 0.595

Difference in PDs = -0.01 (-0.06, 0.04)

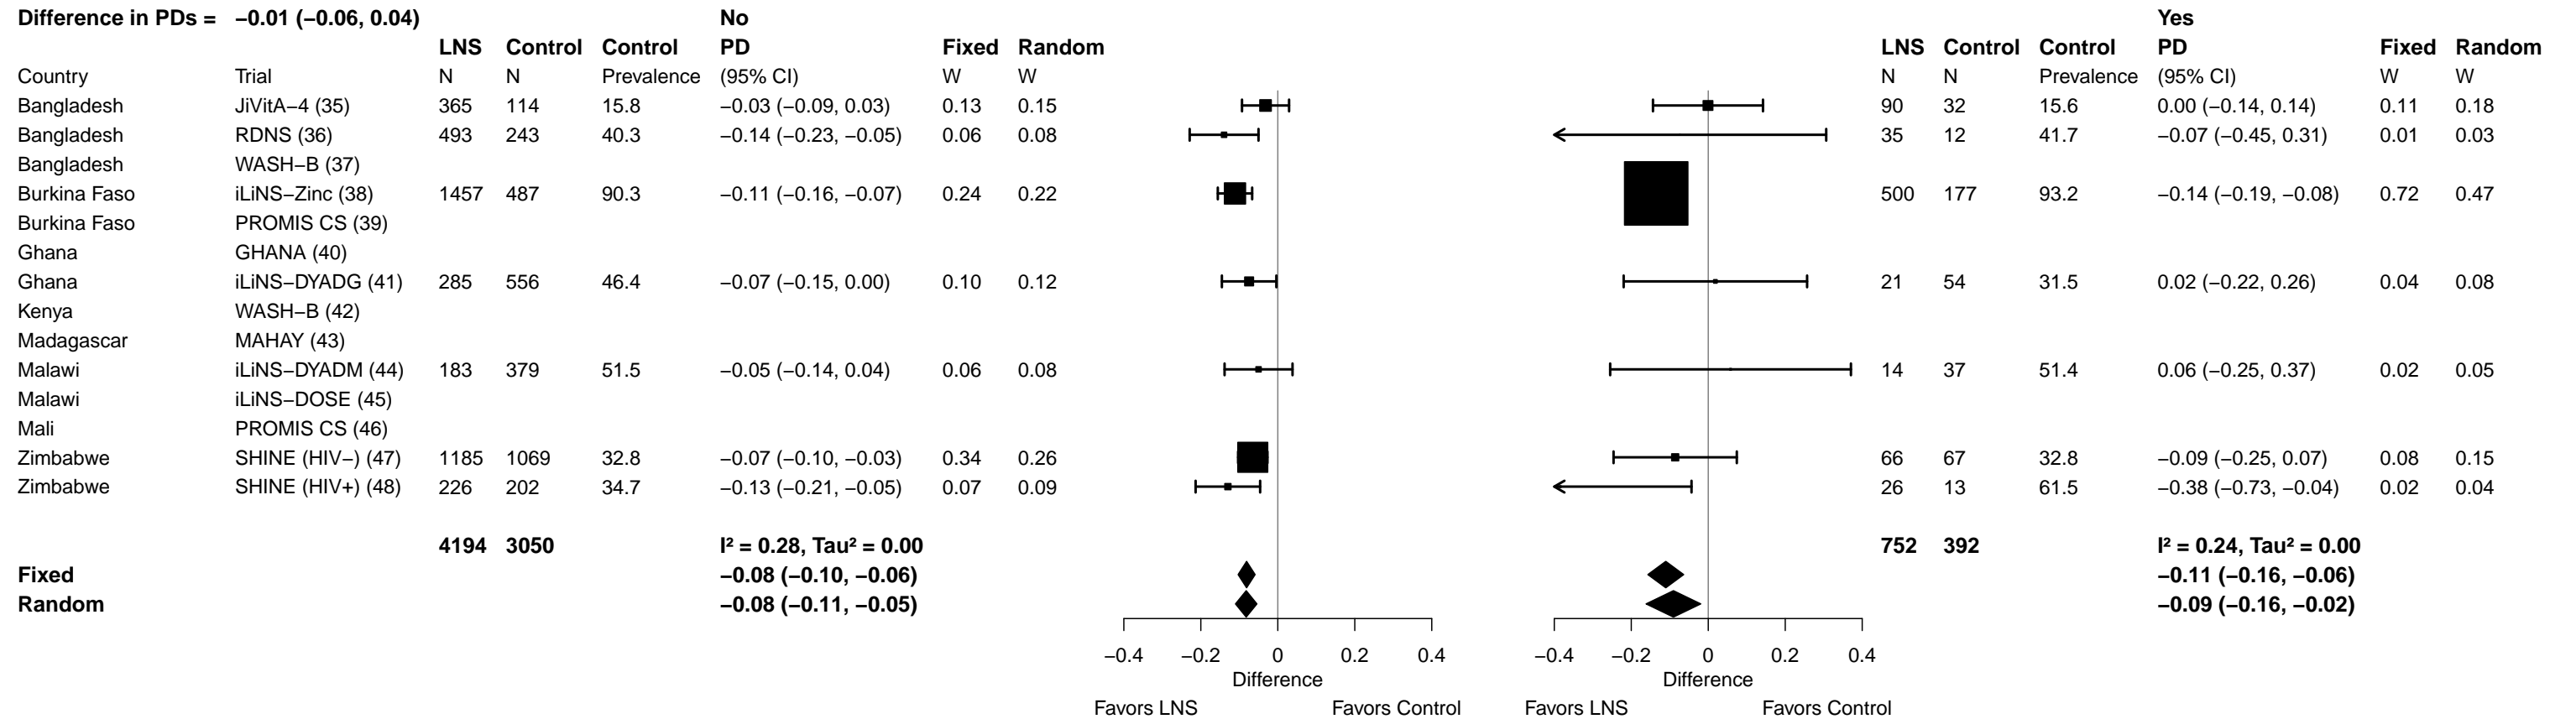

Supplemental figure 6C: Anemia prevalence difference

6C7: Stratified by Child baseline anemia

**P-for-interaction = 0.308**

**Difference in PDs = -0.04 (-0.10, 0.03)**

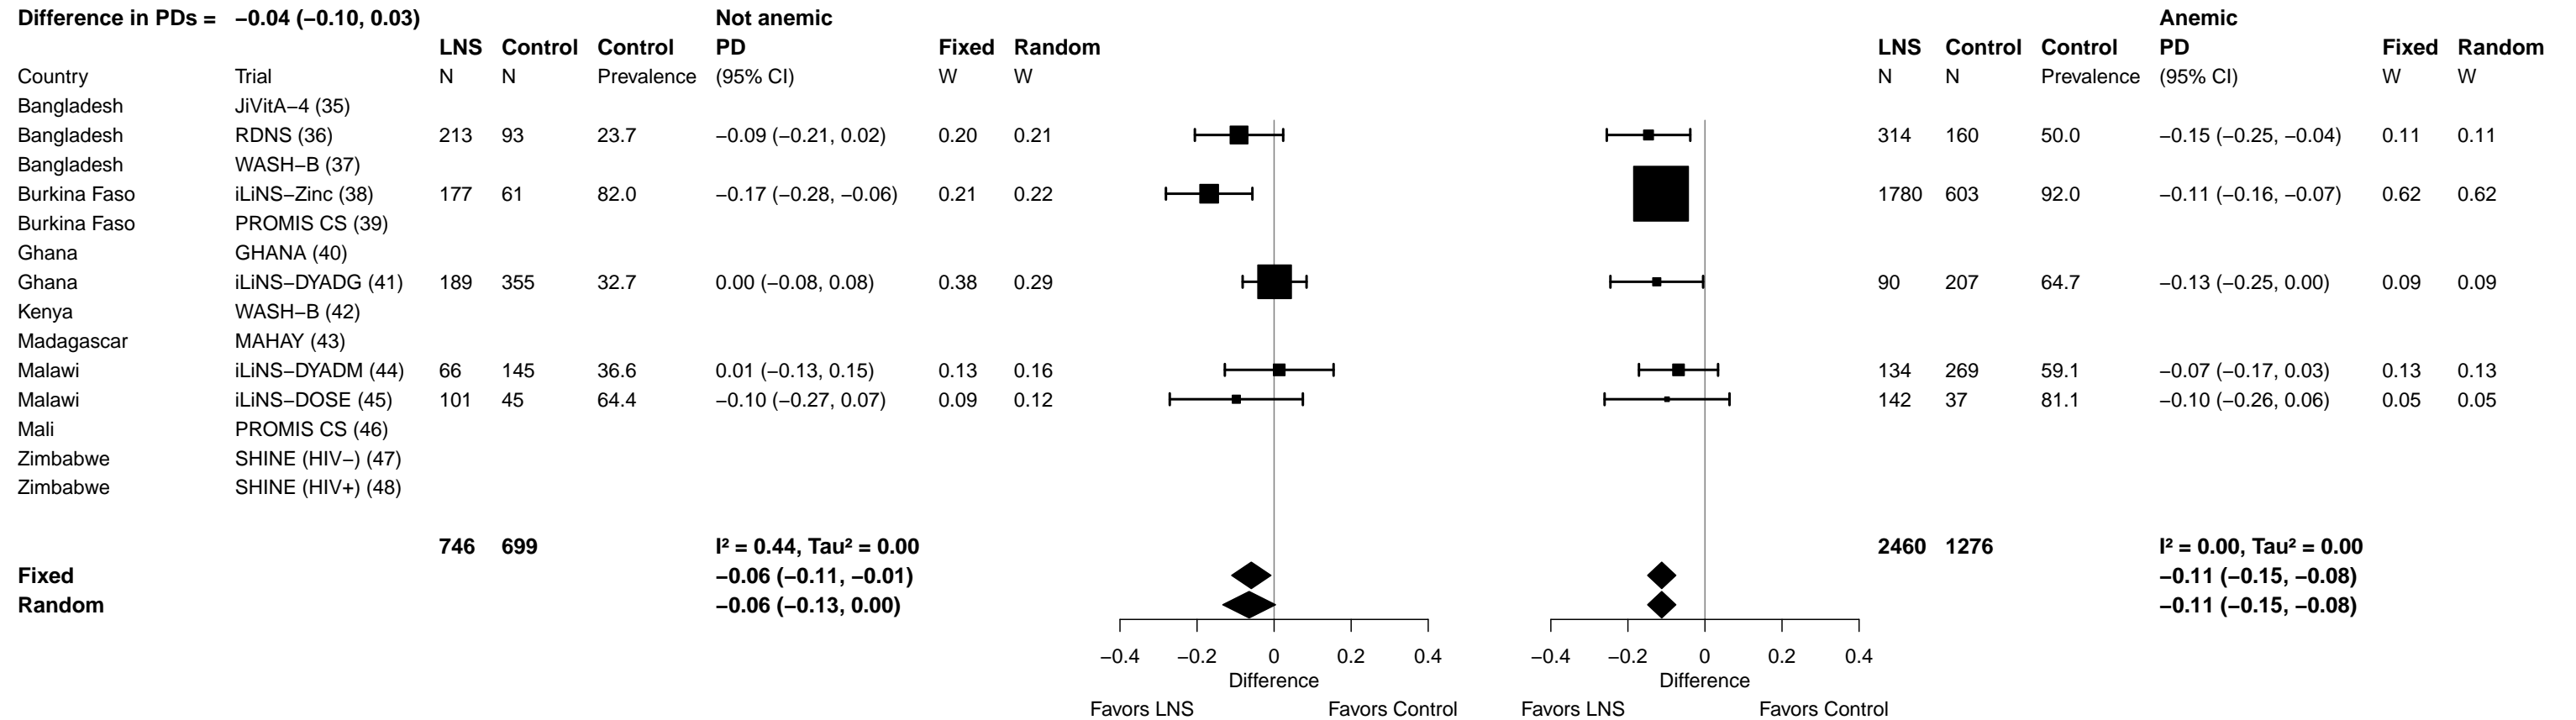

Supplemental figure 6C: Anemia prevalence difference

6C8: Stratified by Child high-dose vitamin A supplementation

**P-for-interaction = 0.549**

**Difference in PDs = -0.01 (-0.06, 0.03)**

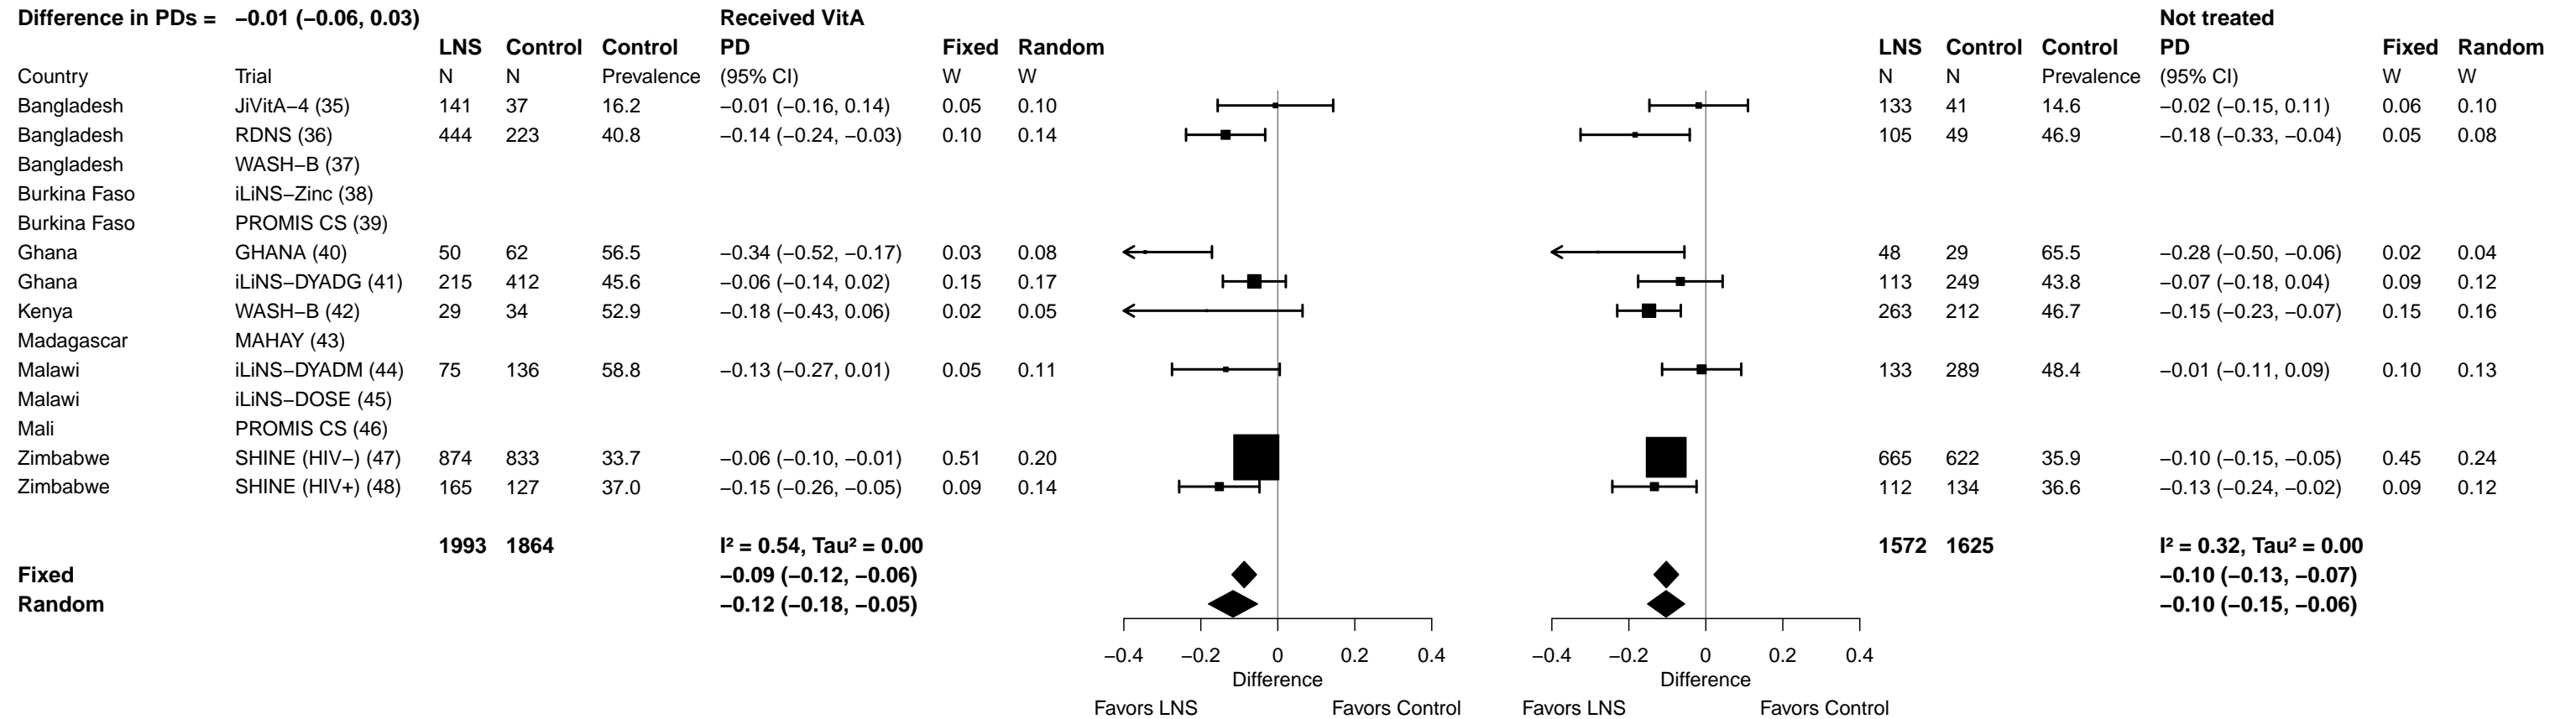

Supplemental figure 6C: Anemia prevalence difference

6C9: Stratified by Child inflammation

**P-for-interaction = 0.068**  
**Difference in PDs = 0.06 (0.00, 0.12)**

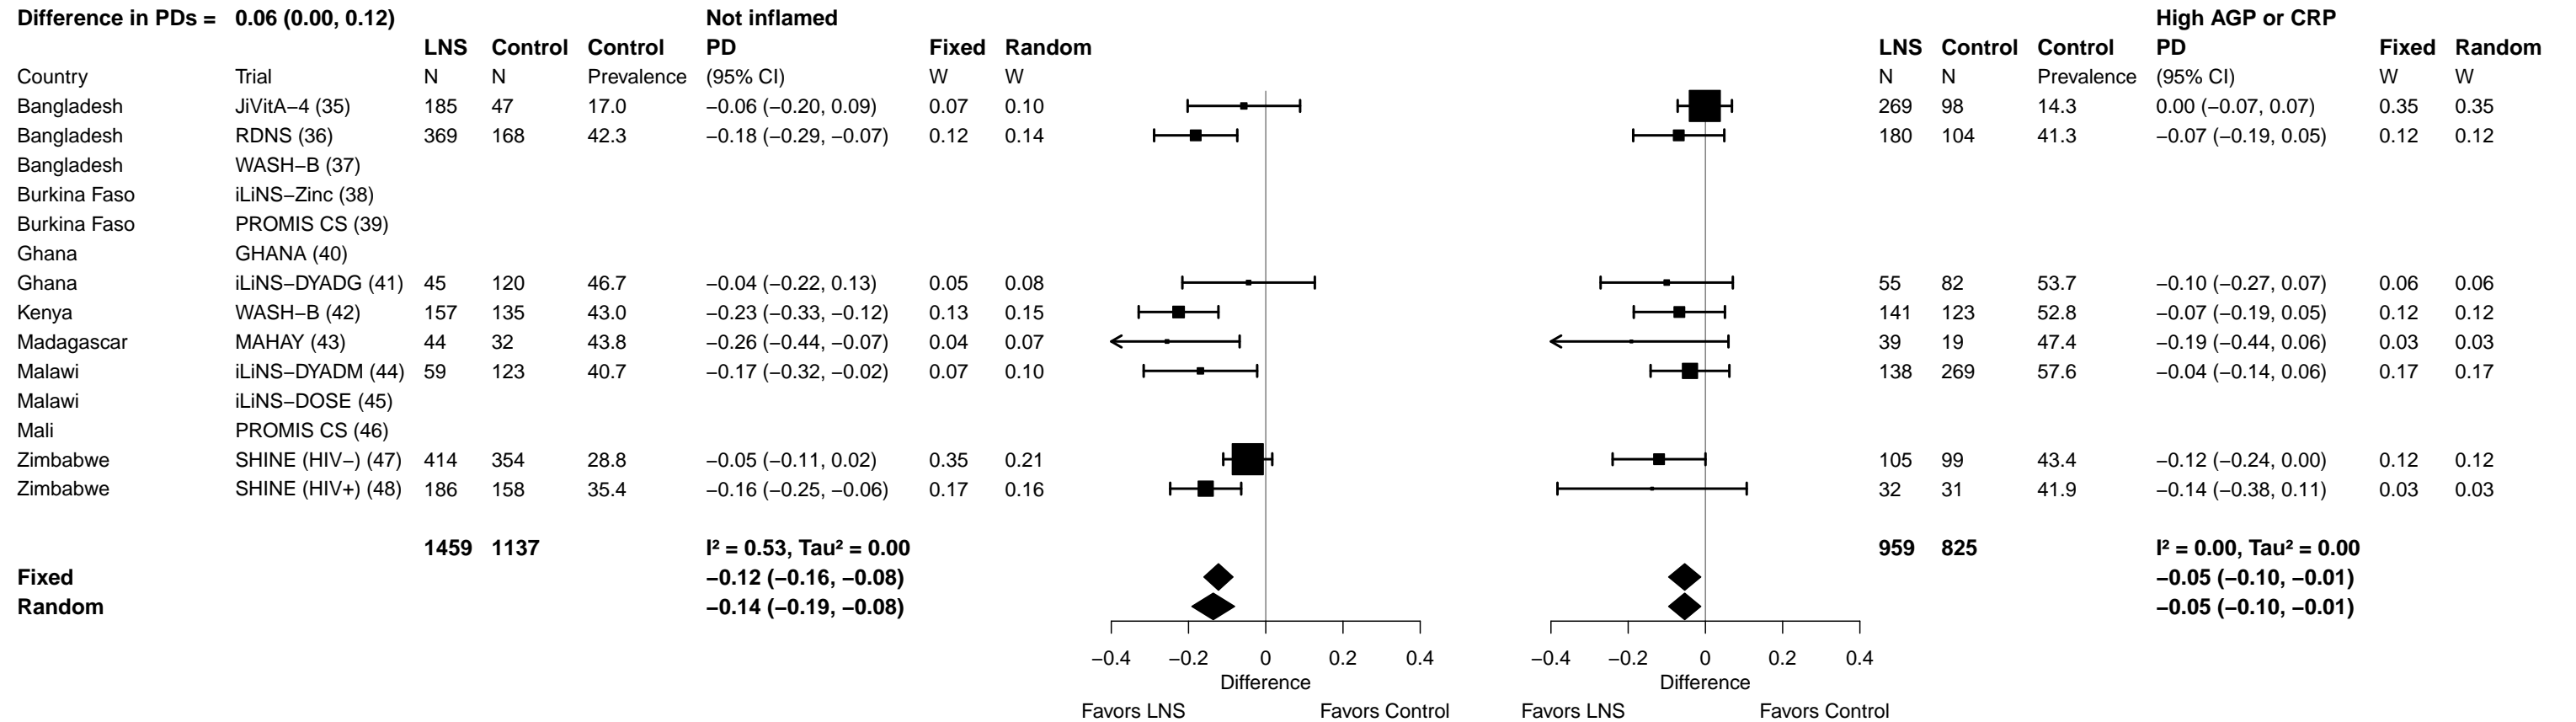



### Supplemental figure 6D: Moderate-to-severe anemia prevalence ratio

#### 6D1: Stratified by Maternal BMI

**P-for-interaction = 0.459**

**Ratio of PRs = 1.03 (0.96, 1.10)**

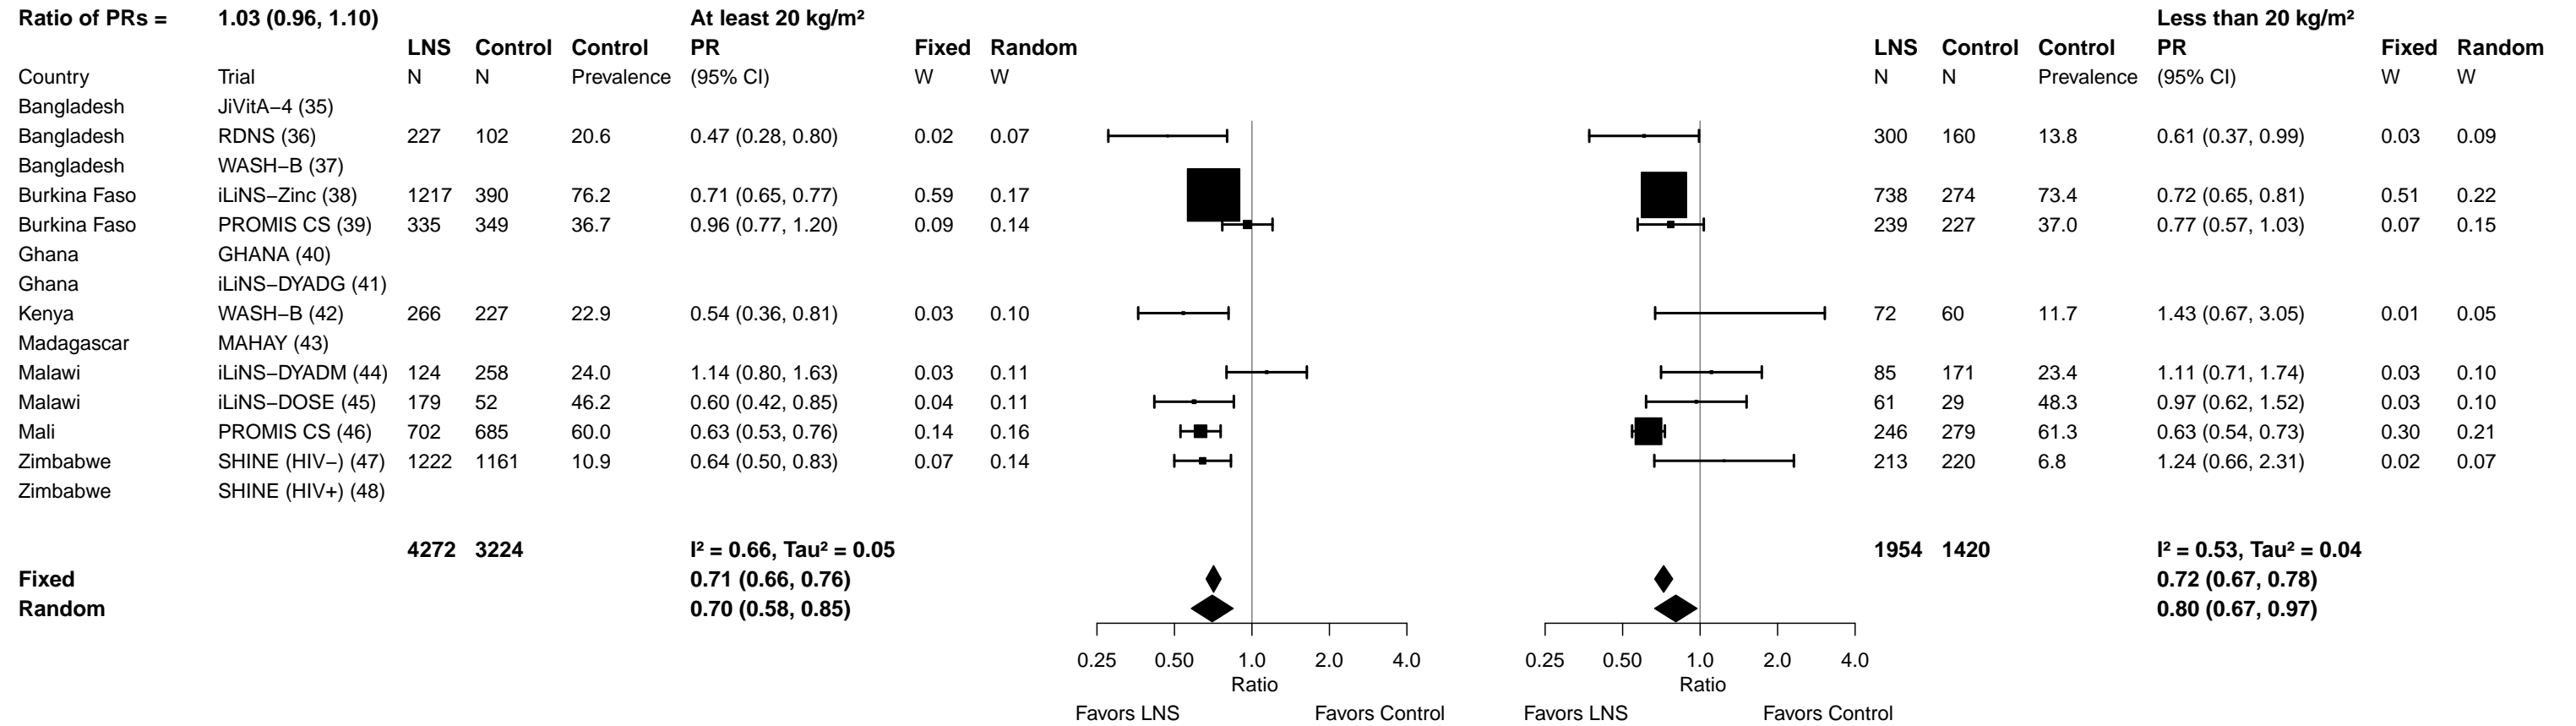

Supplemental figure 6D: Moderate-to-severe anemia prevalence ratio

6D2: Stratified by Maternal age

P-for-interaction = 0.260

Ratio of PRs = 1.06 (0.96, 1.18)

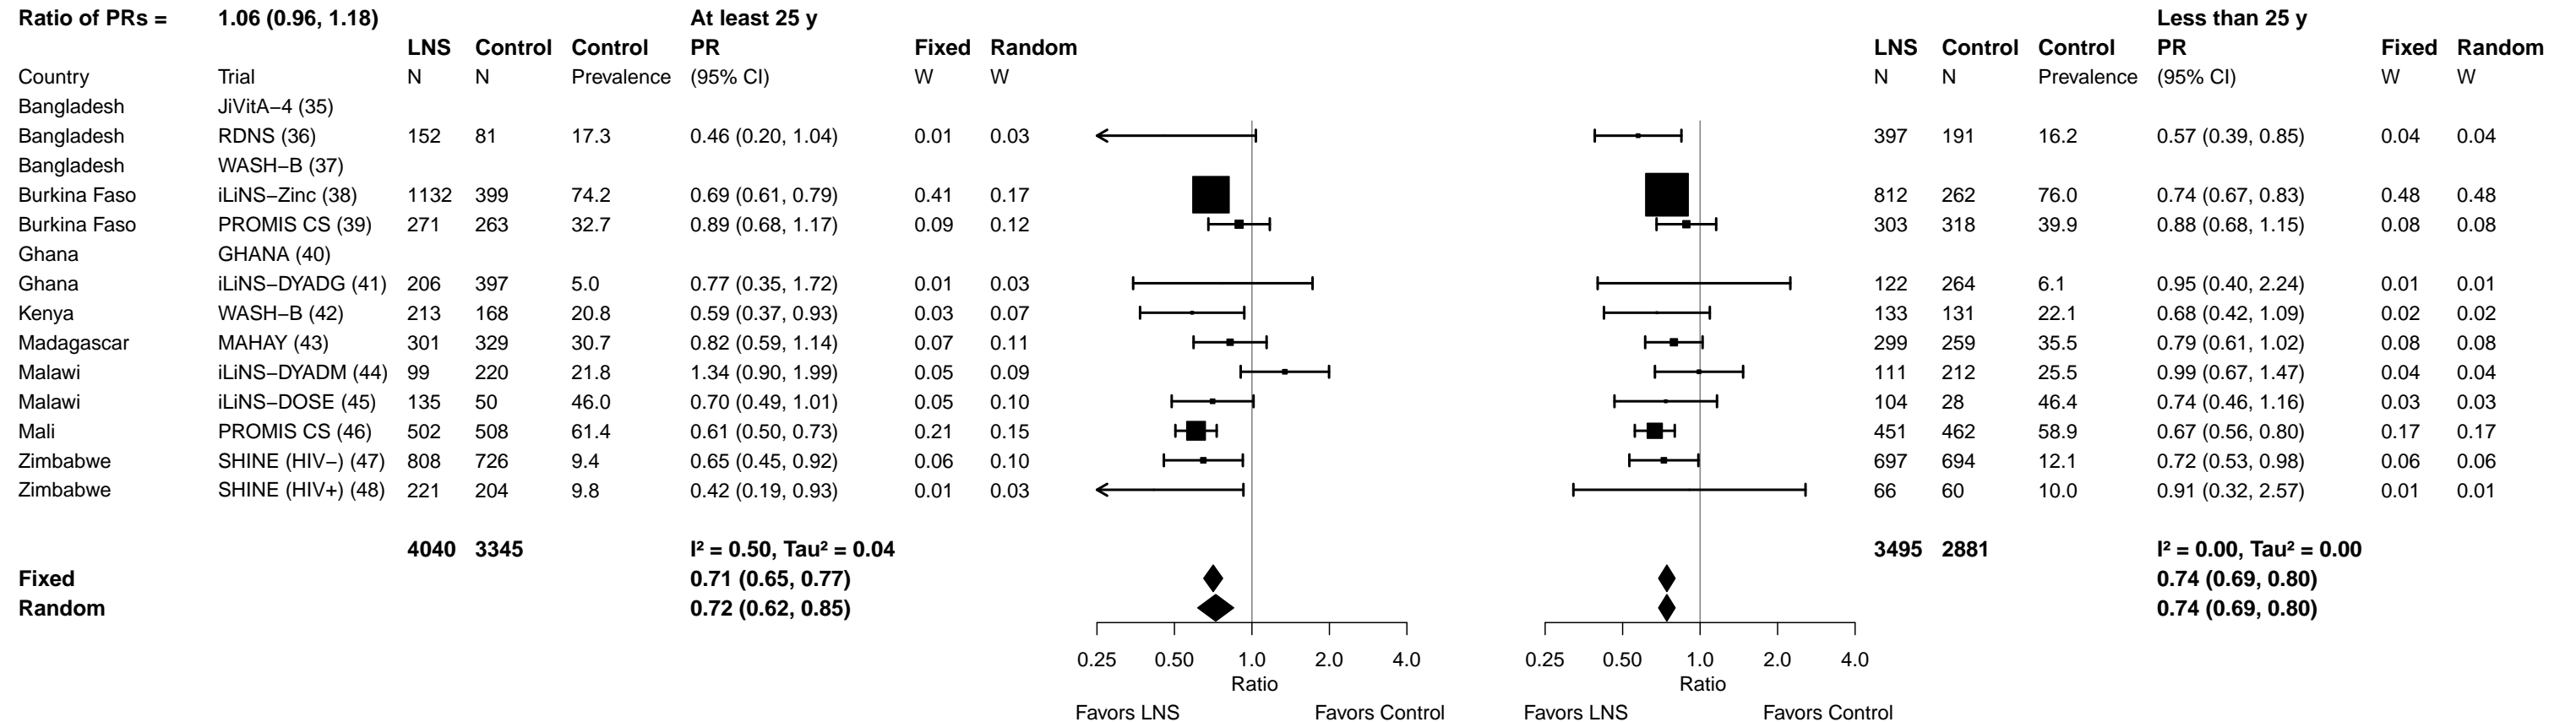

Supplemental figure 6D: Moderate-to-severe anemia prevalence ratio

6D3: Stratified by Maternal education

P-for-interaction = 0.437

Ratio of PRs = 1.07 (0.90, 1.28)

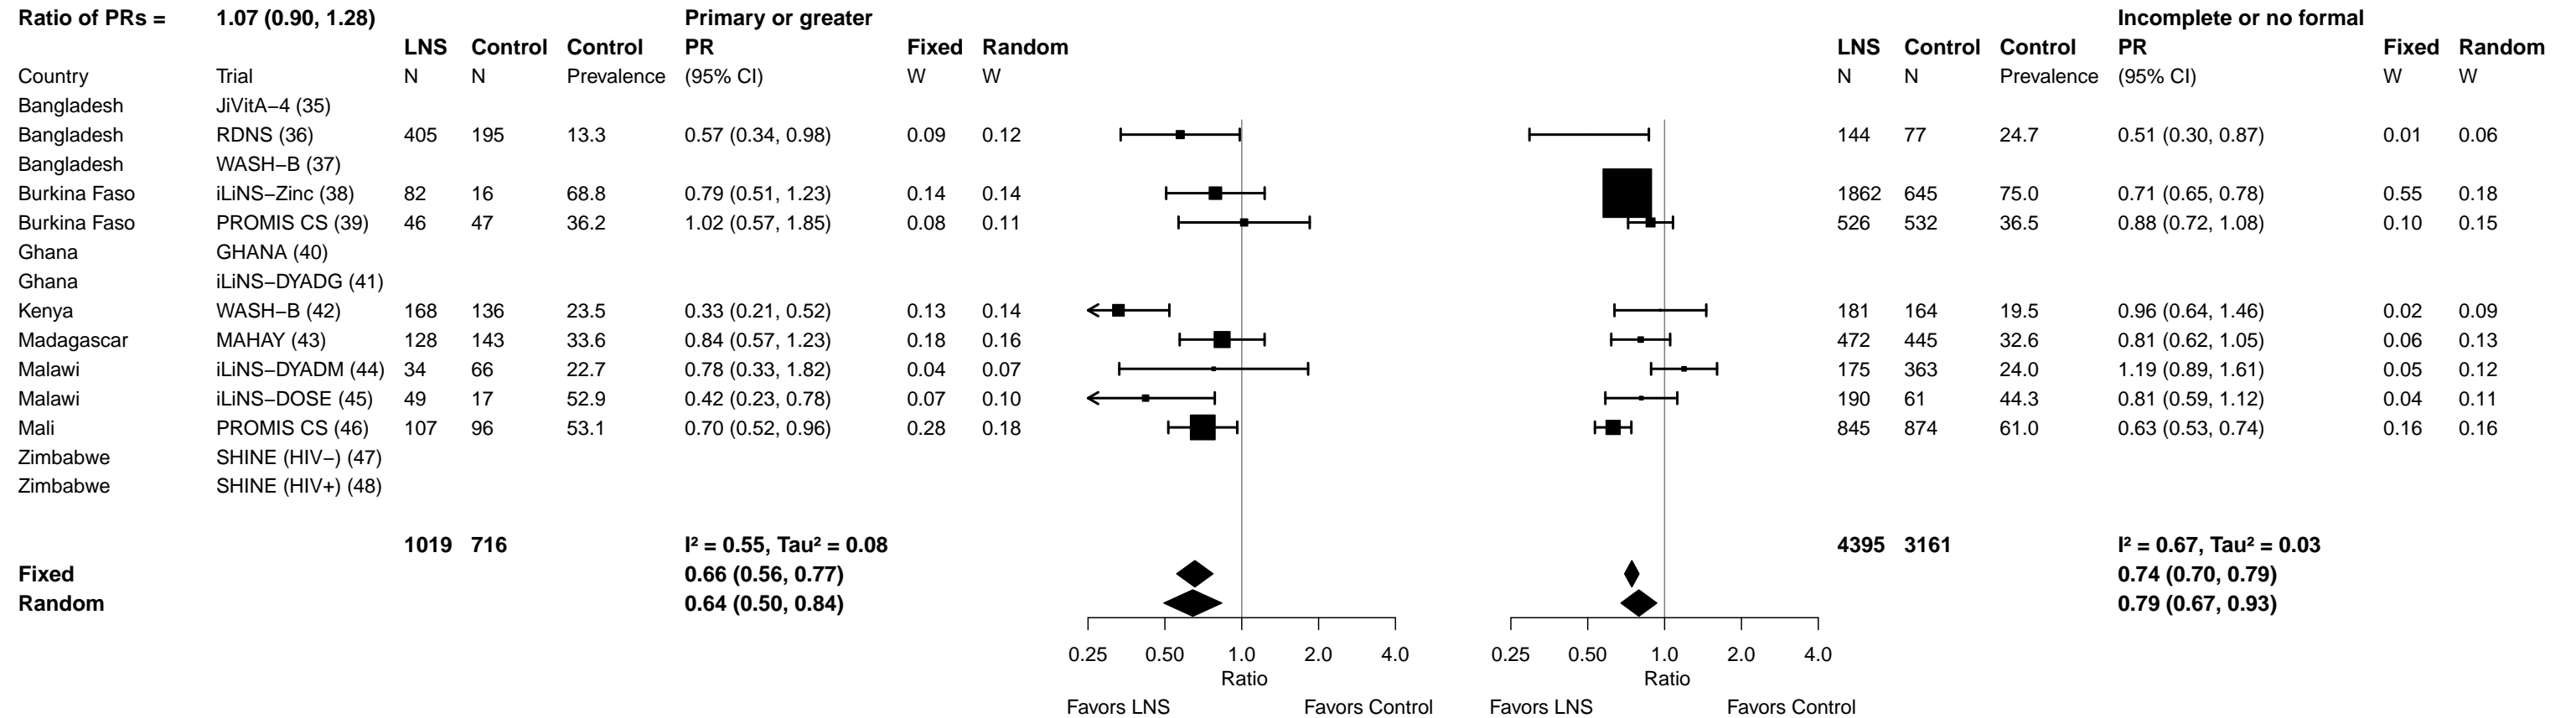

Supplemental figure 6D: Moderate-to-severe anemia prevalence ratio

6D4: Stratified by Child sex

**P-for-interaction = 0.692**  
**Ratio of PRs = 1.02 (0.93, 1.12)**

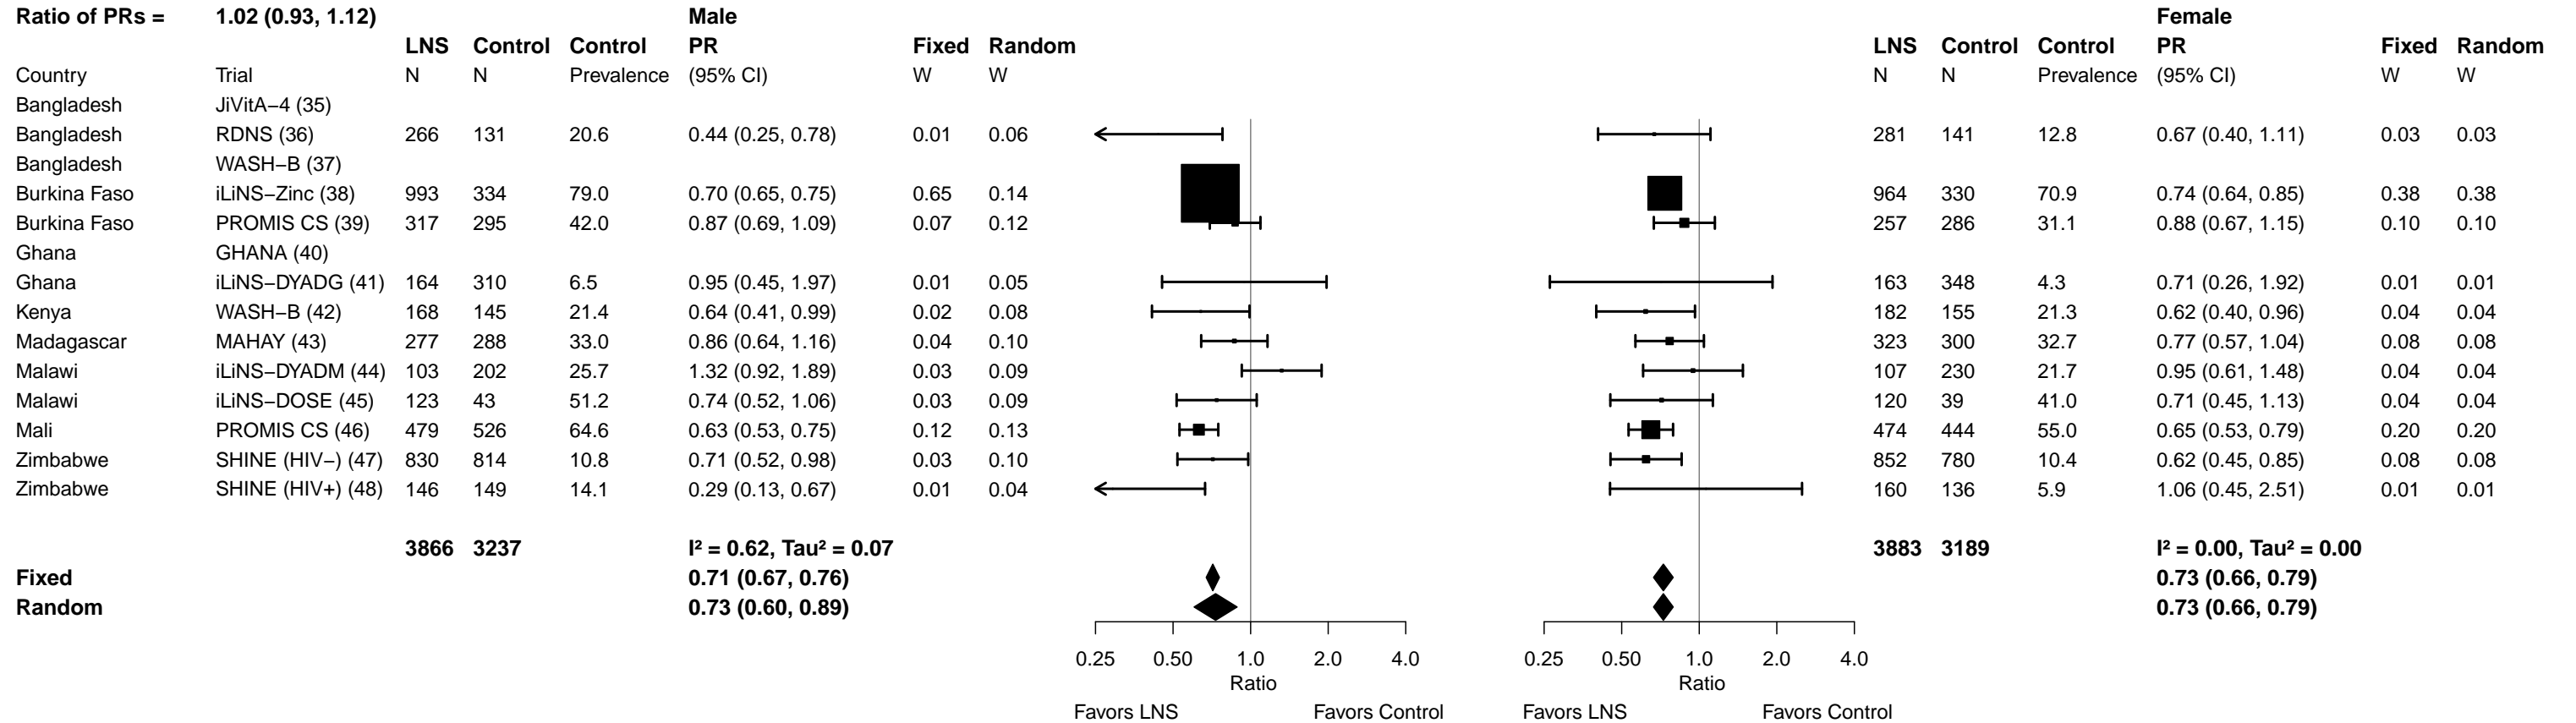

Supplemental figure 6D: Moderate-to-severe anemia prevalence ratio

6D5: Stratified by Child birth order

P-for-interaction = 0.416

Ratio of PRs = 1.05 (0.94, 1.17)

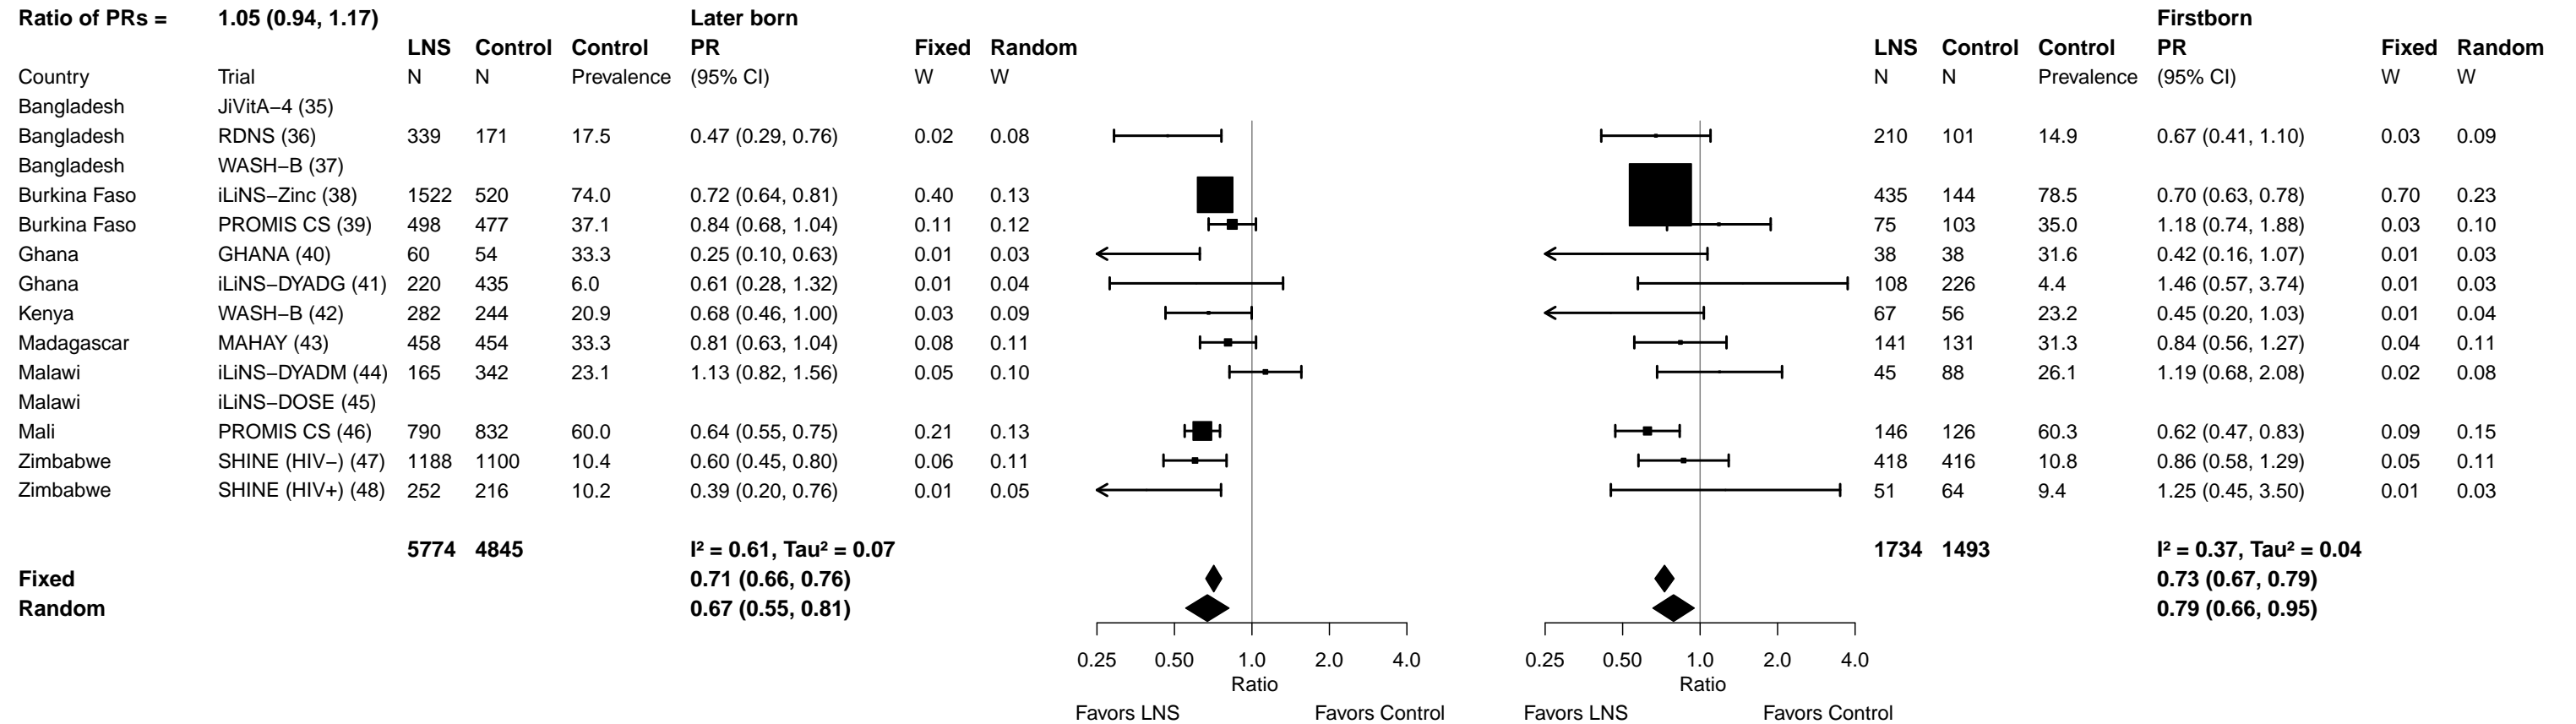

**Supplemental figure 6D: Moderate-to-severe anemia prevalence ratio**

**6D6: Stratified by Child baseline acute malnutrition (insufficient comparisons)**

Supplemental figure 6D: Moderate-to-severe anemia prevalence ratio

6b7: Stratified by Child baseline anemia

**P-for-interaction = 0.686**  
**Ratio of PRs = 1.05 (0.82, 1.35)**

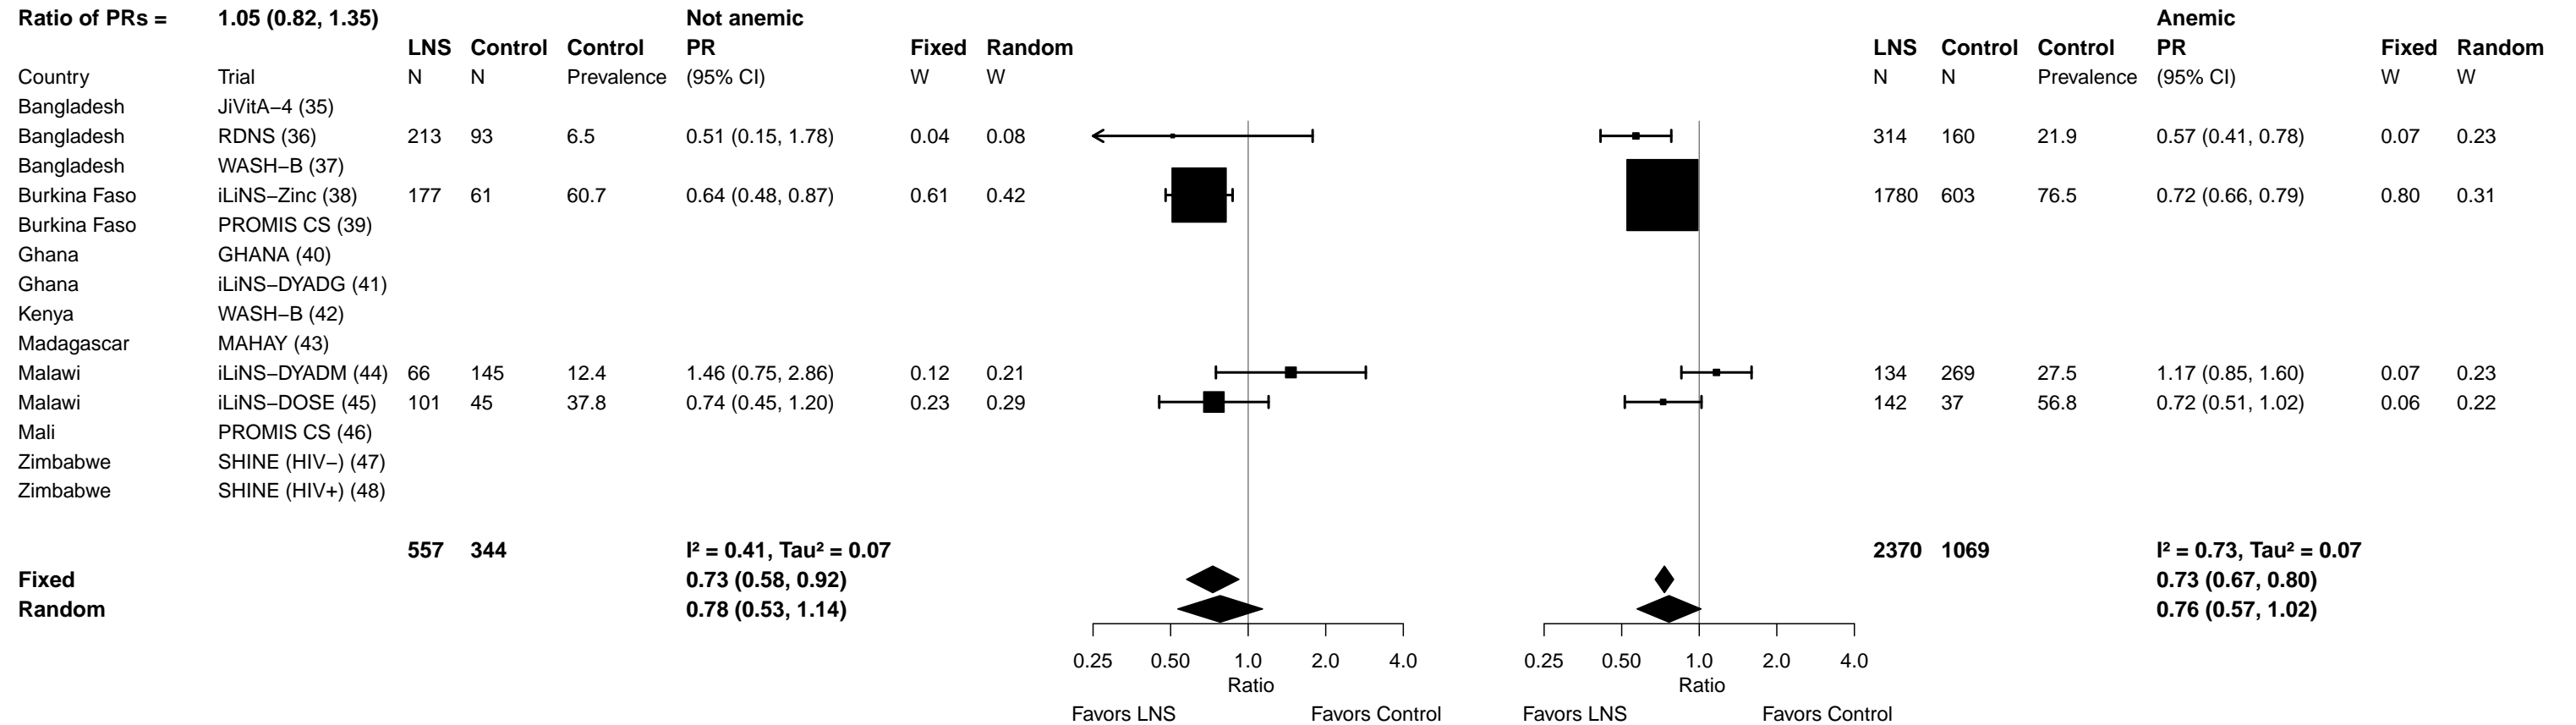

Supplemental figure 6D: Moderate-to-severe anemia prevalence ratio

6D8: Stratified by Child high-dose vitamin A supplementation

P-for-interaction = 0.874

Ratio of PRs = 1.03 (0.75, 1.40)

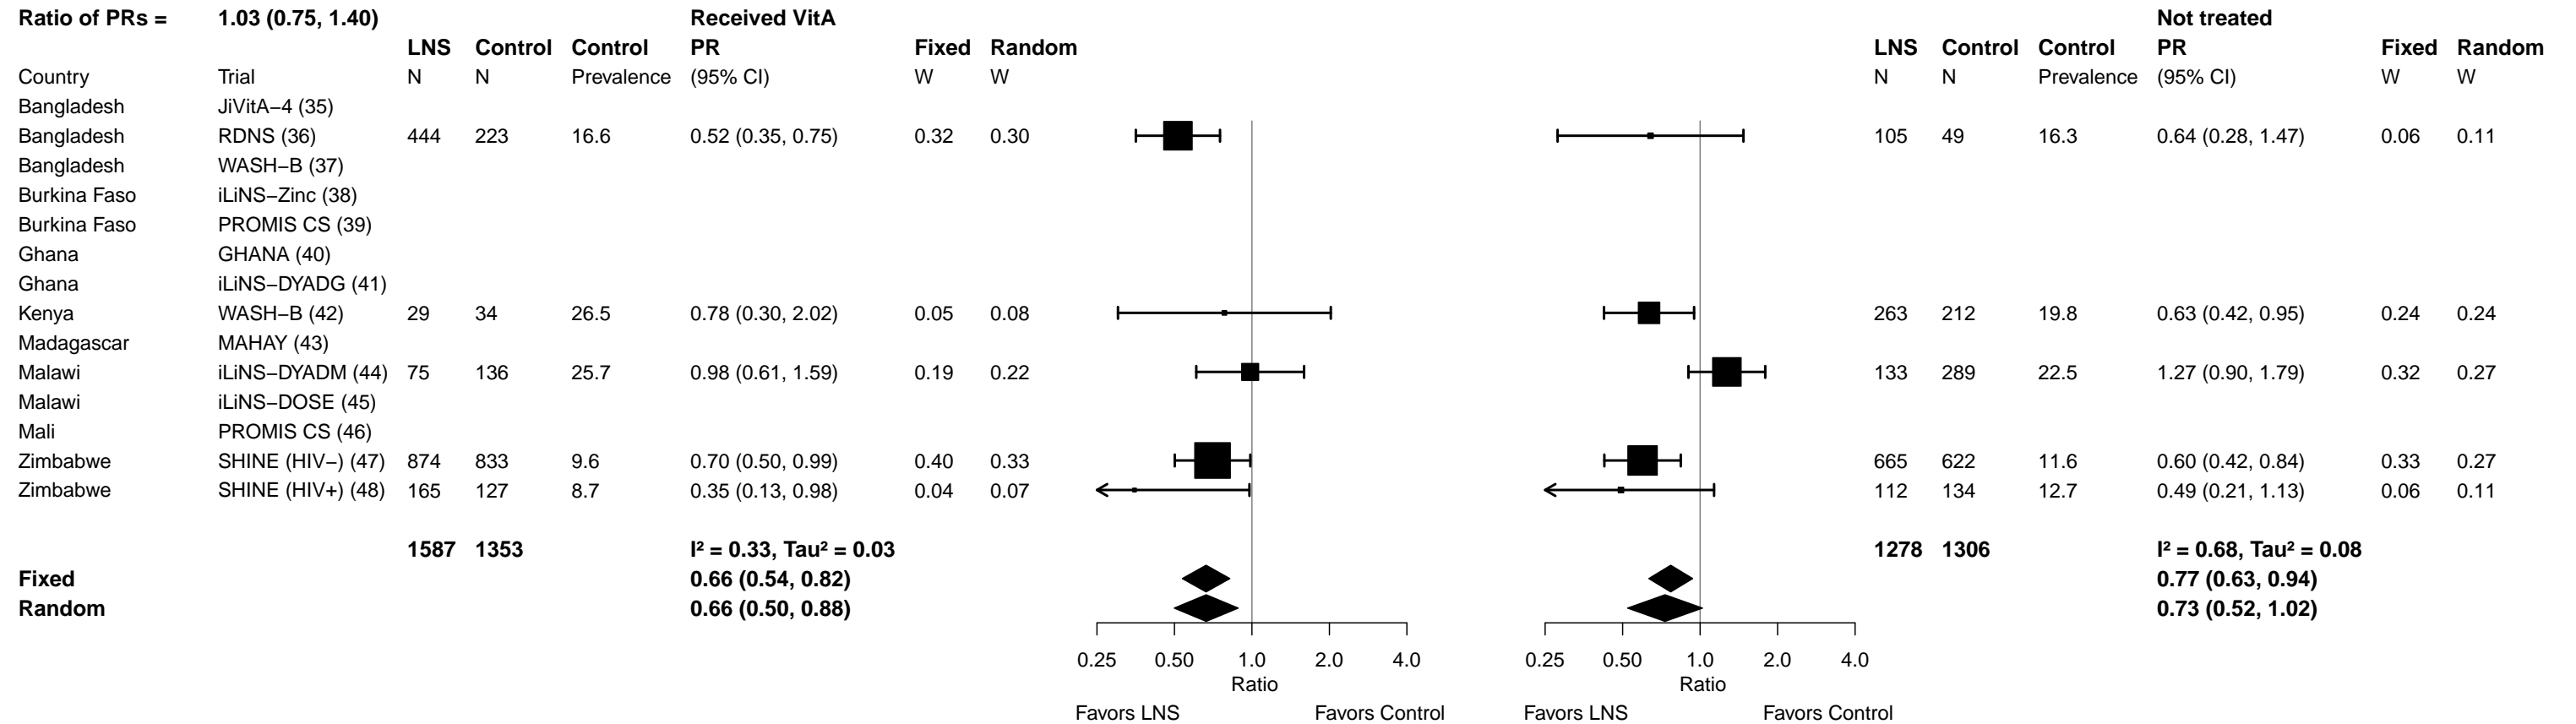





### Supplemental figure 6E: Moderate-to-severe anemia prevalence difference

#### 6E1: Stratified by Maternal BMI

**P-for-interaction = 0.047**  
**Difference in PDs = 0.03 (0.00, 0.07)**

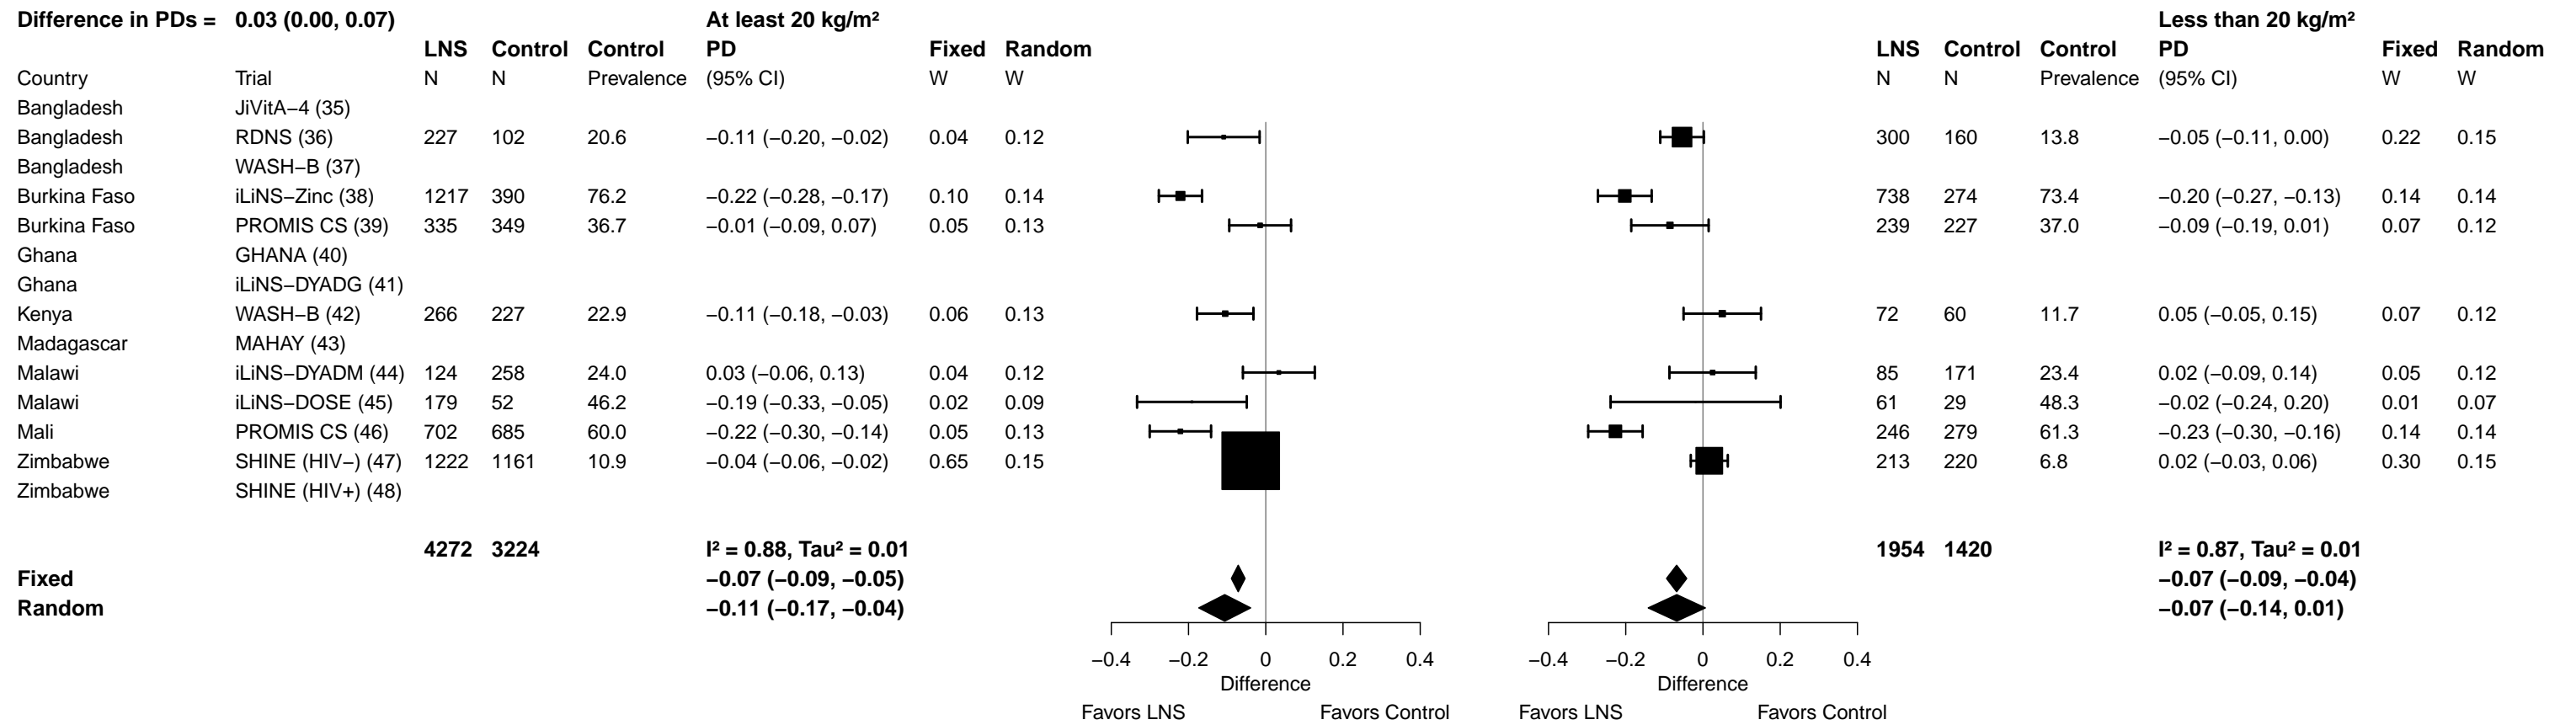

Supplemental figure 6E: Moderate-to-severe anemia prevalence difference

6E2: Stratified by Maternal age

**P-for-interaction = 0.502**  
**Difference in PDs = 0.01 (-0.02, 0.03)**

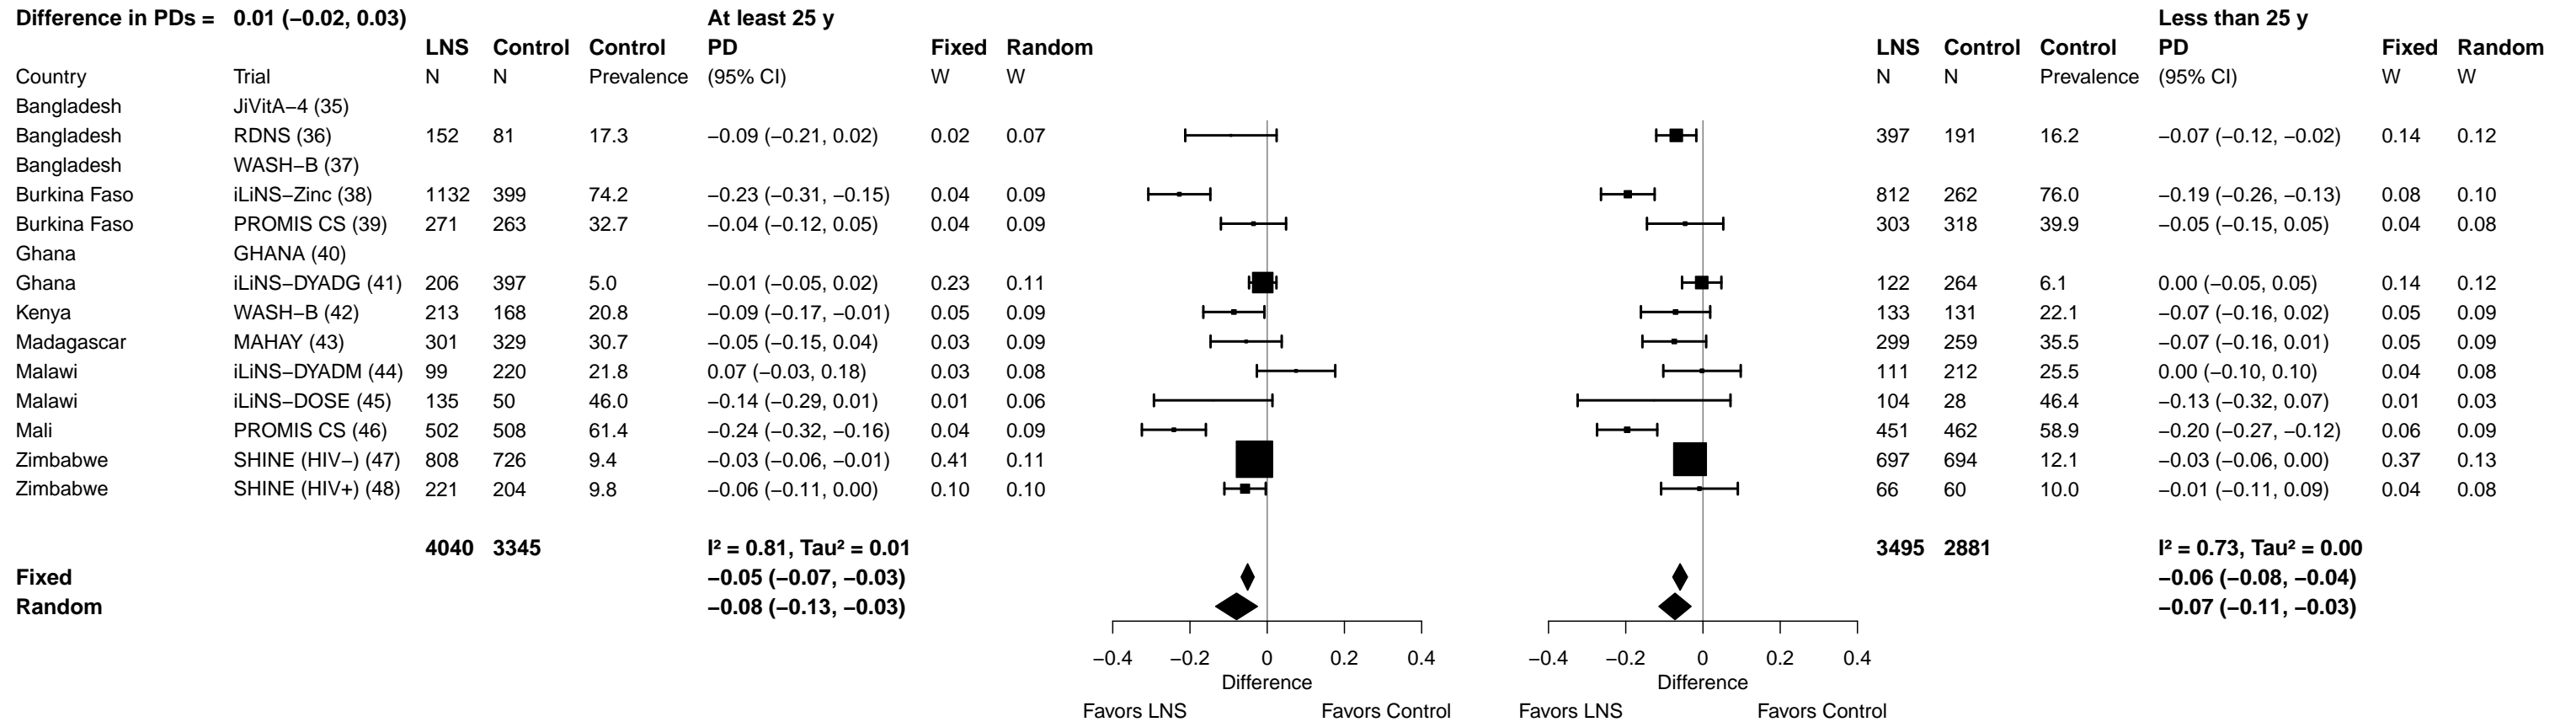

Supplemental figure 6E: Moderate-to-severe anemia prevalence difference

6E3: Stratified by Maternal education

P-for-interaction = 0.526

Difference in PDs = 0.02 (-0.04, 0.07)

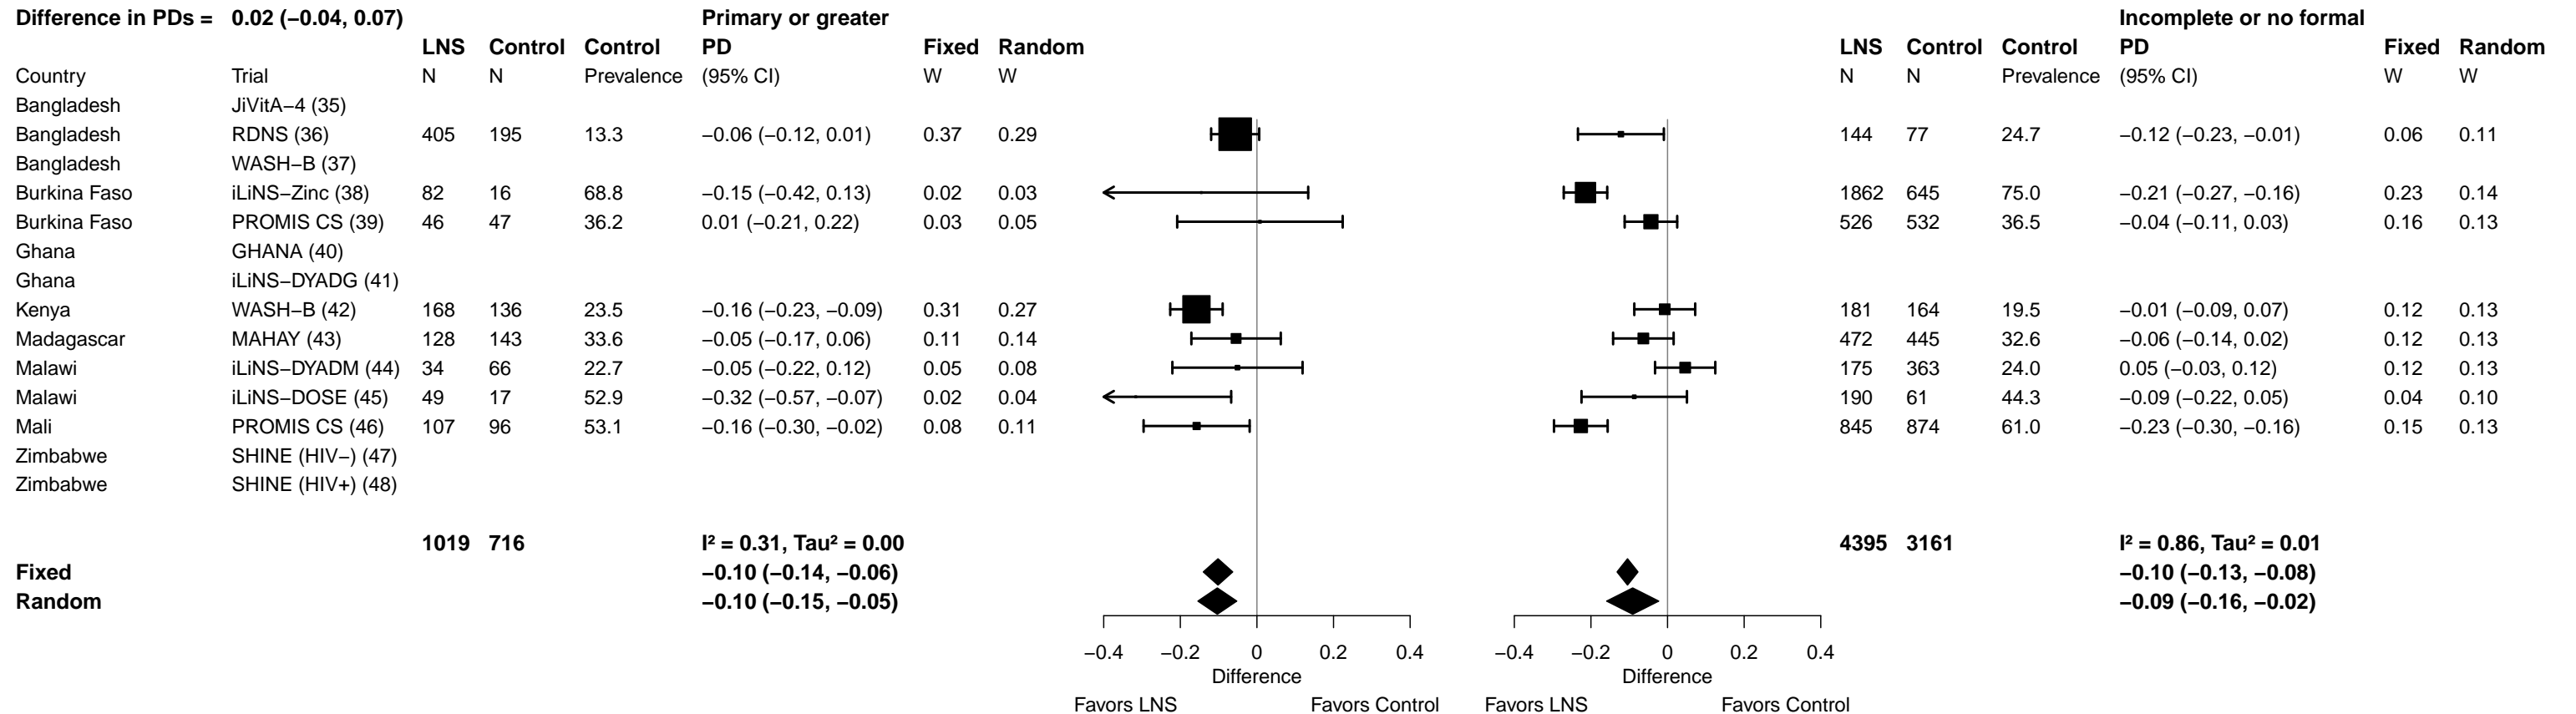

Supplemental figure 6E: Moderate-to-severe anemia prevalence difference

6E4: Stratified by Child sex

**P-for-interaction = 0.323**  
**Difference in PDs = 0.01 (-0.01, 0.04)**

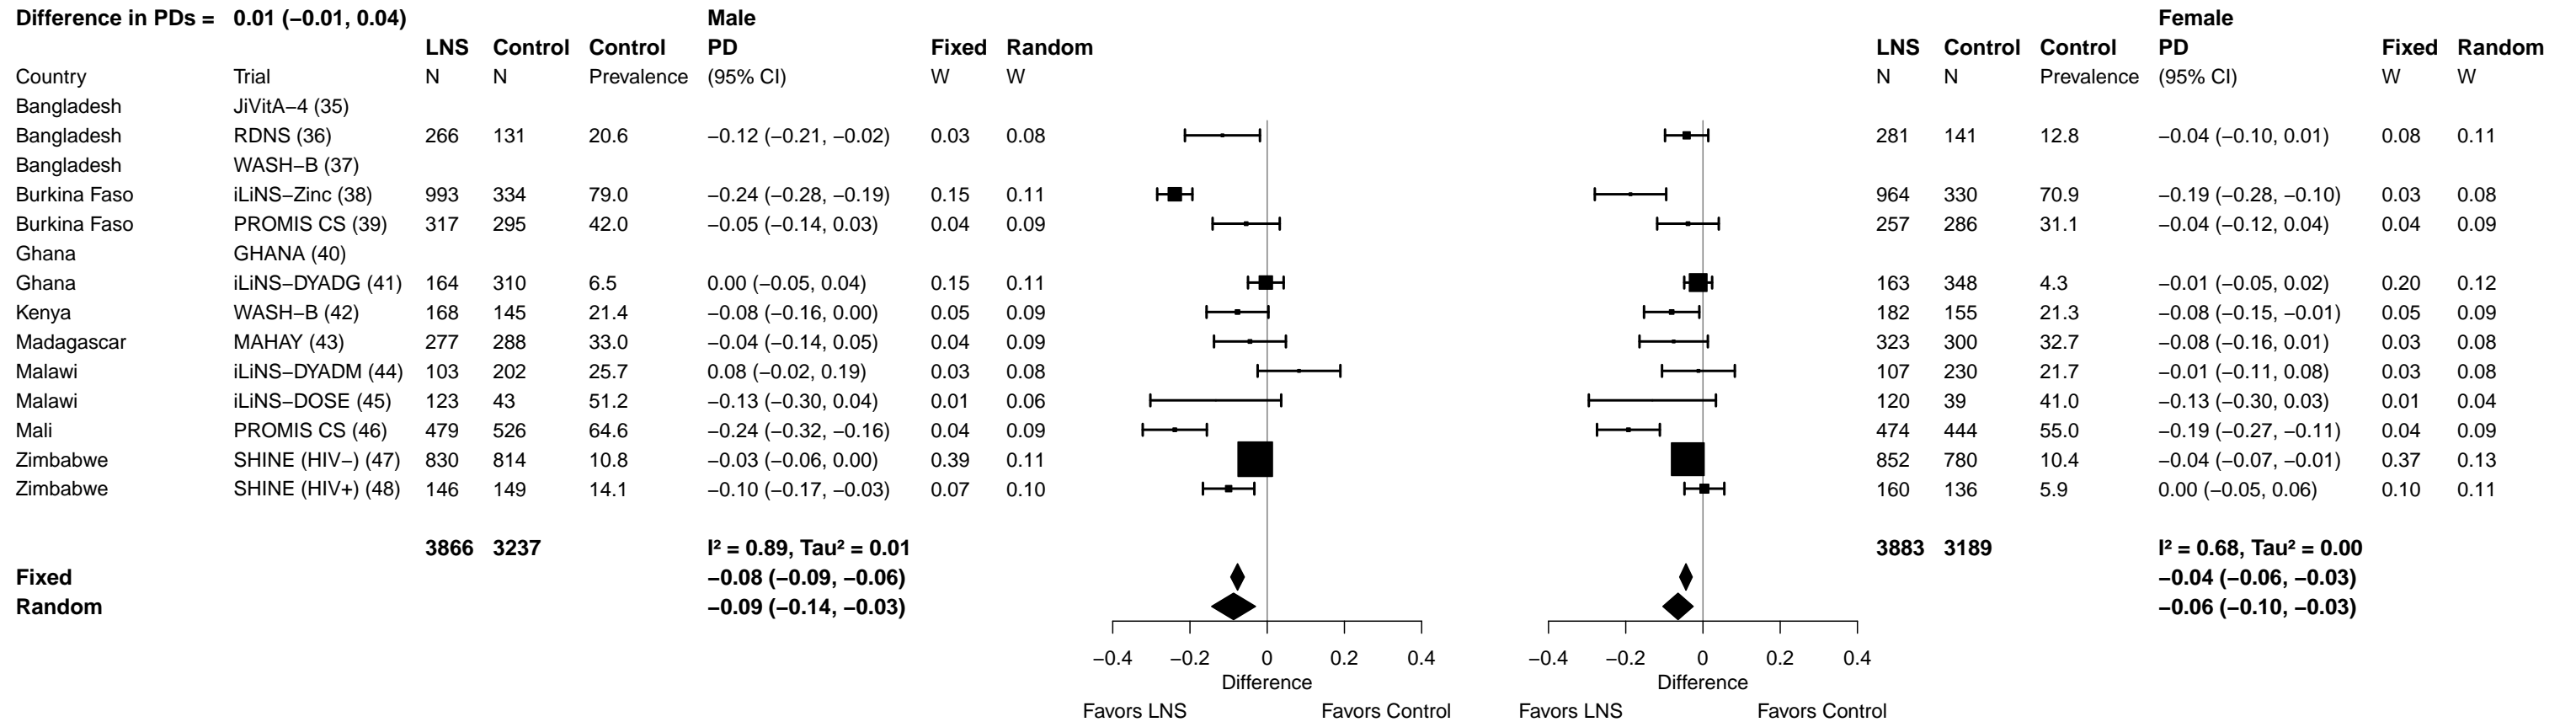

Supplemental figure 6E: Moderate-to-severe anemia prevalence difference

6E5: Stratified by Child birth order

**P-for-interaction = 0.058**  
**Difference in PDs = 0.03 (0.00, 0.06)**

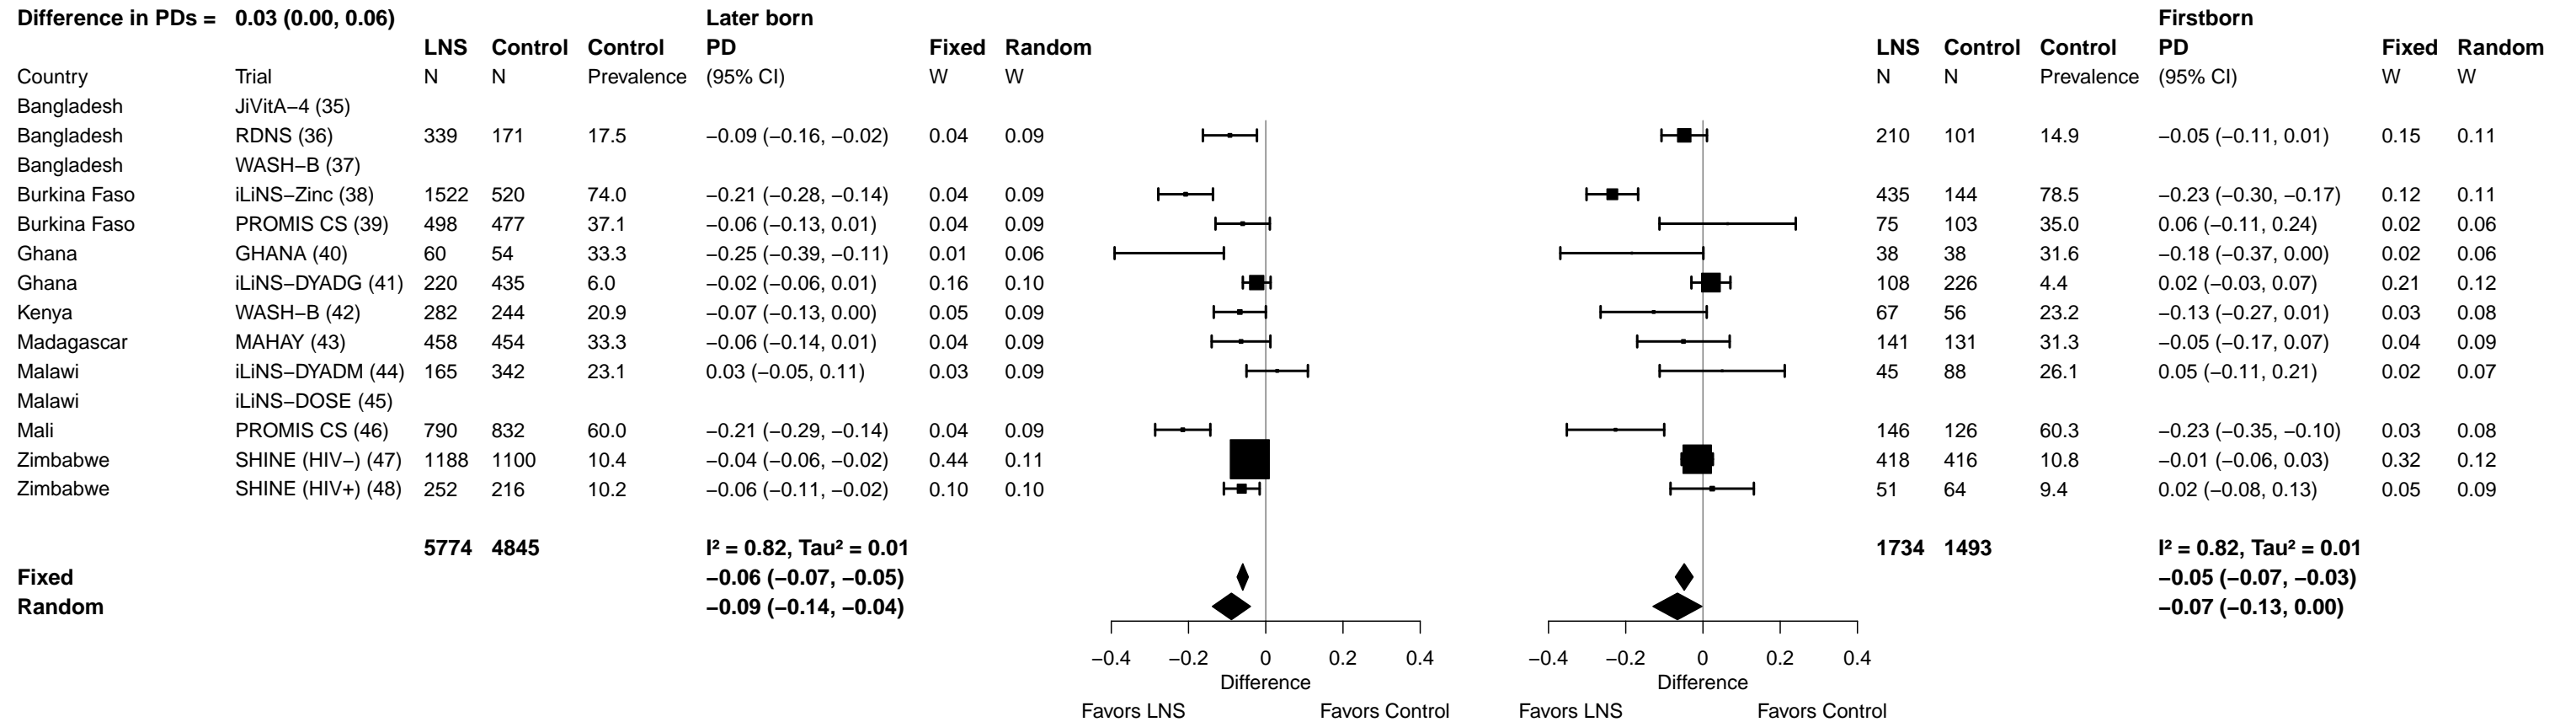

**Supplemental figure 6E: Moderate-to-severe anemia prevalence difference**

**6E6: Stratified by Child baseline acute malnutrition (insufficient comparisons)**

Supplemental figure 6E: Moderate-to-severe anemia prevalence difference

6E7: Stratified by Child baseline anemia

P-for-interaction = 0.251

Difference in PDs = -0.04 (-0.10, 0.03)

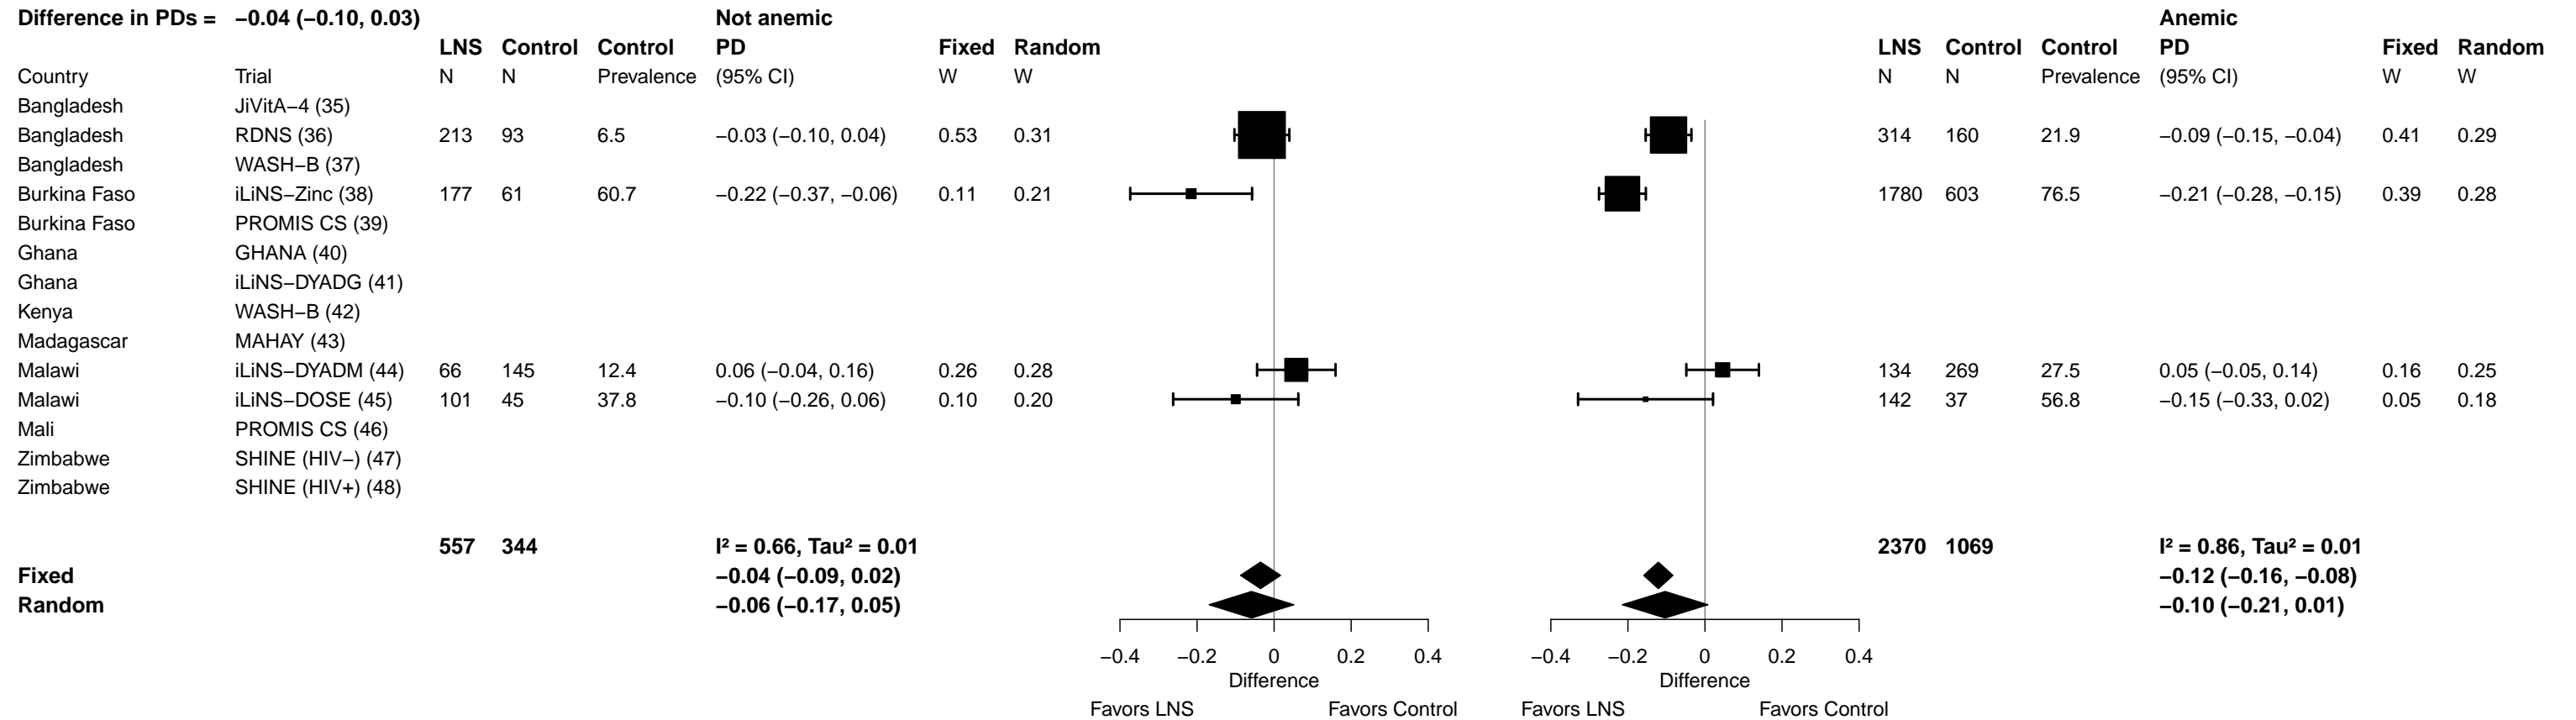



Supplemental figure 6E: Moderate-to-severe anemia prevalence difference

6E8: Stratified by Child high-dose vitamin A supplementation

P-for-interaction = 0.589

Difference in PDs = -0.01 (-0.04, 0.03)

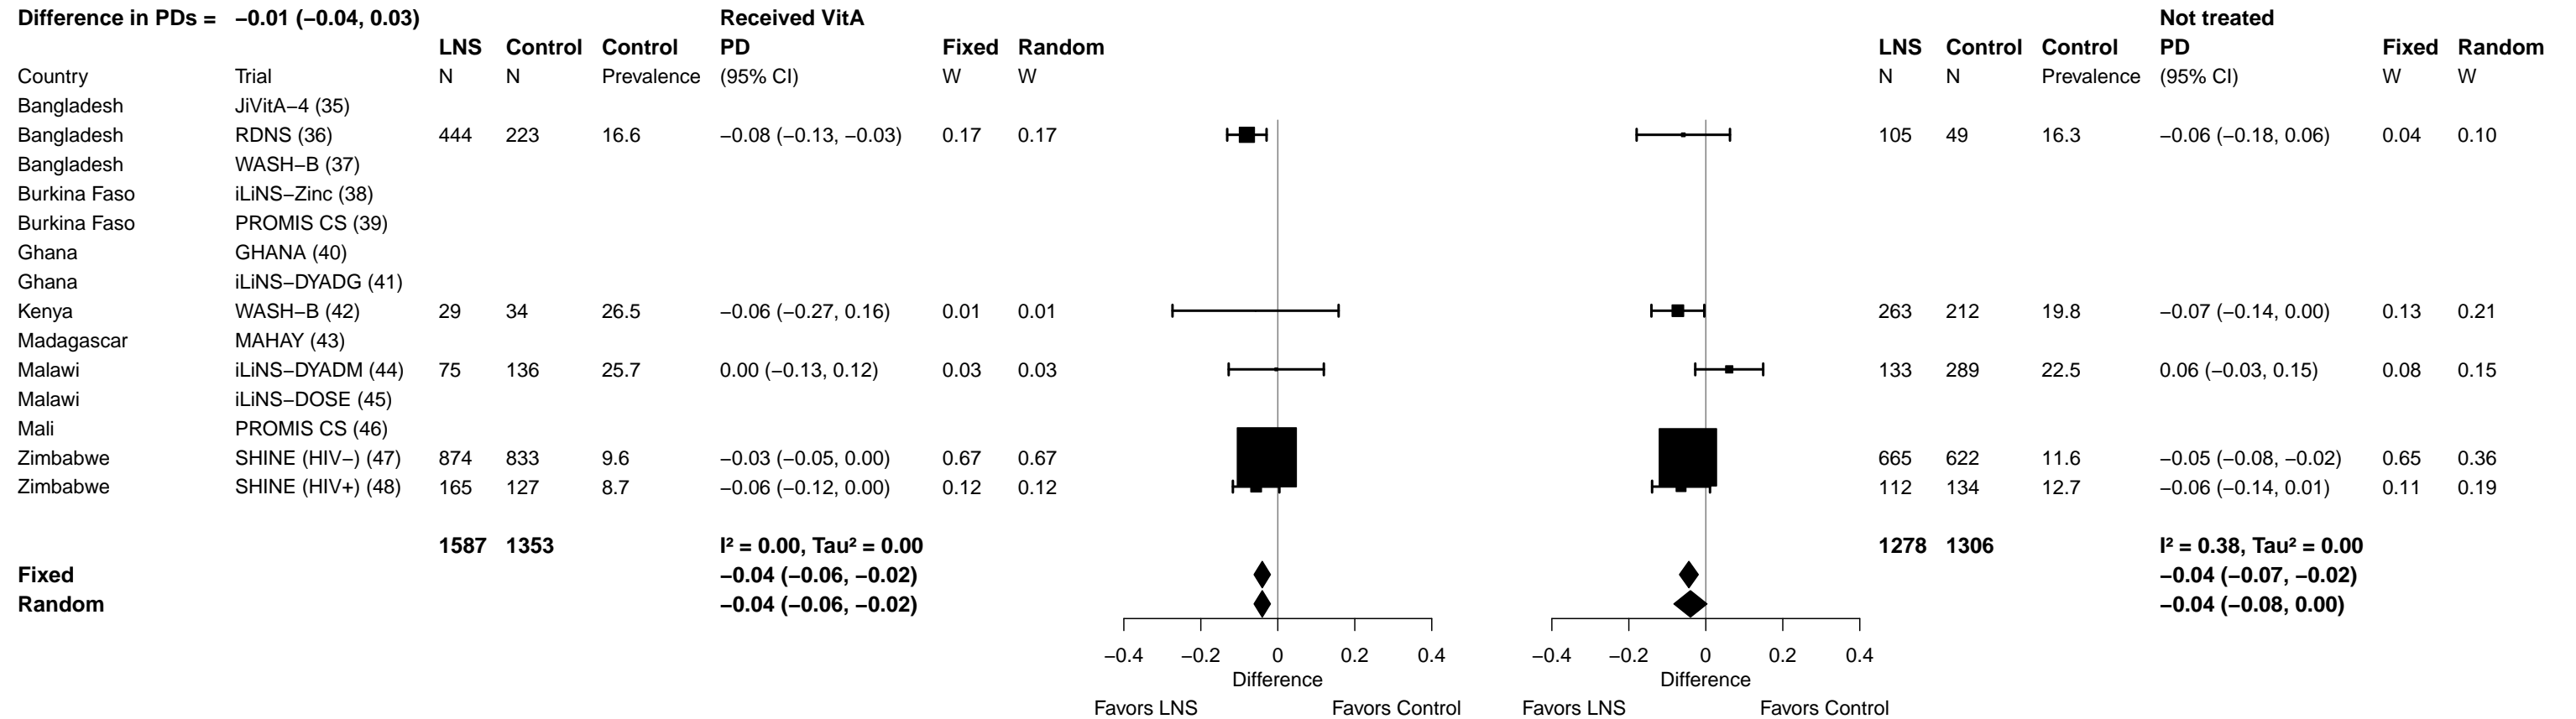



### Supplemental figure 6F: Geometric mean ratio of ferritin concentration

#### 6F1: Stratified by Maternal BMI

**P-for-interaction = 0.221**  
**Ratio of GMRs = 0.91 (0.79, 1.06)**

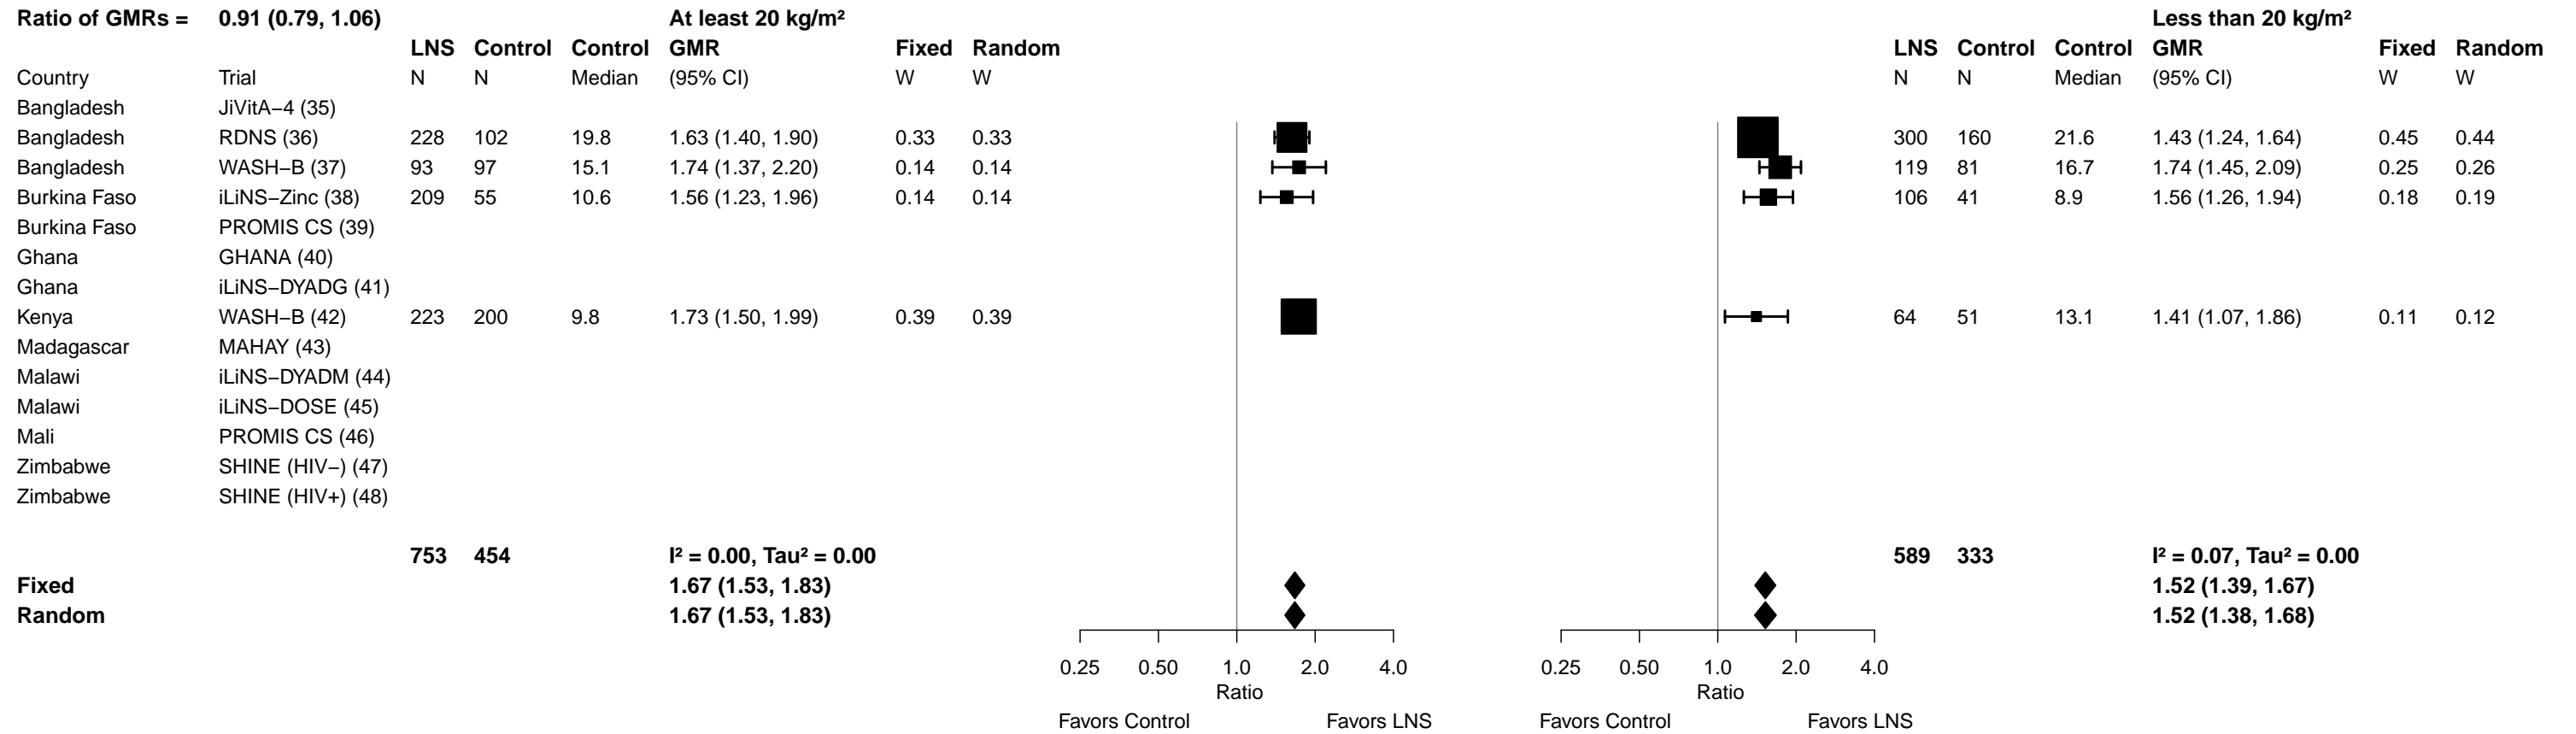

Supplemental figure 6F: Geometric mean ratio of ferritin concentration

6F2: Stratified by Maternal age

**P-for-interaction = 0.112**  
**Ratio of GMRs = 0.92 (0.83, 1.02)**

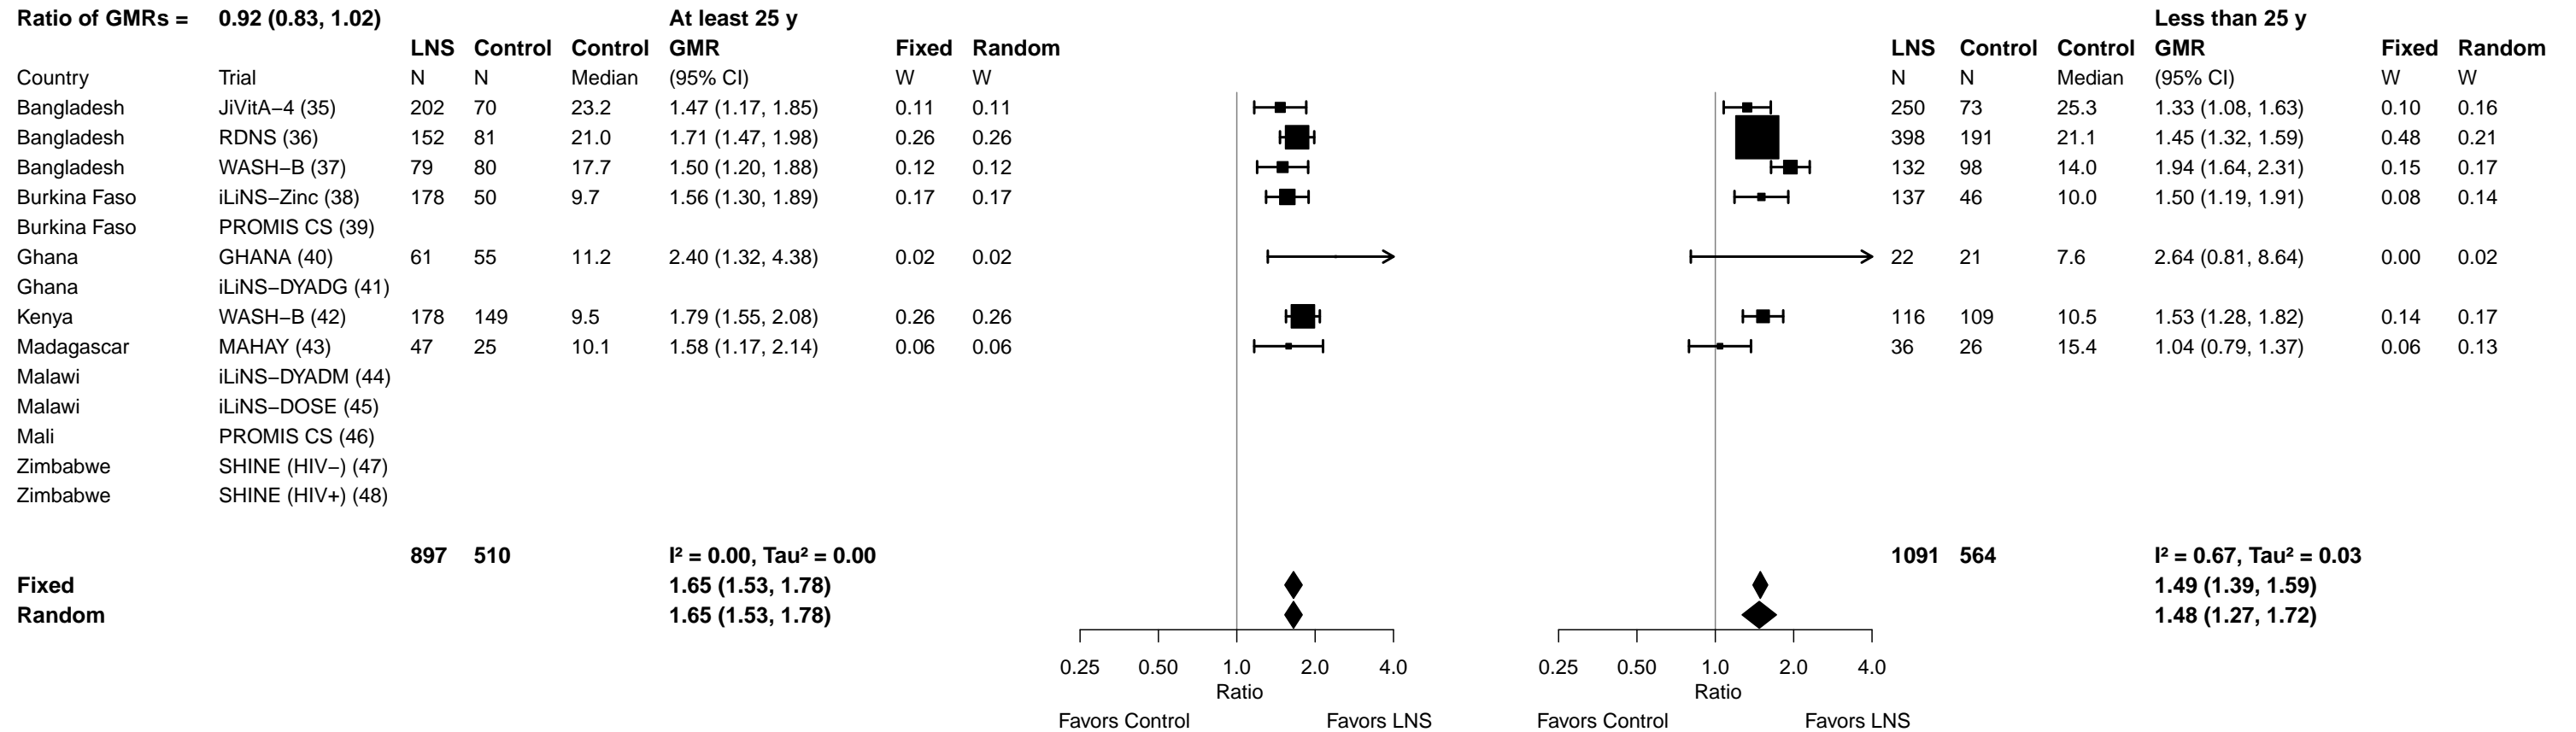

Supplemental figure 6F: Geometric mean ratio of ferritin concentration

6F3: Stratified by Maternal education

**P-for-interaction = 0.928**  
**Ratio of GMRs = 0.99 (0.89, 1.12)**

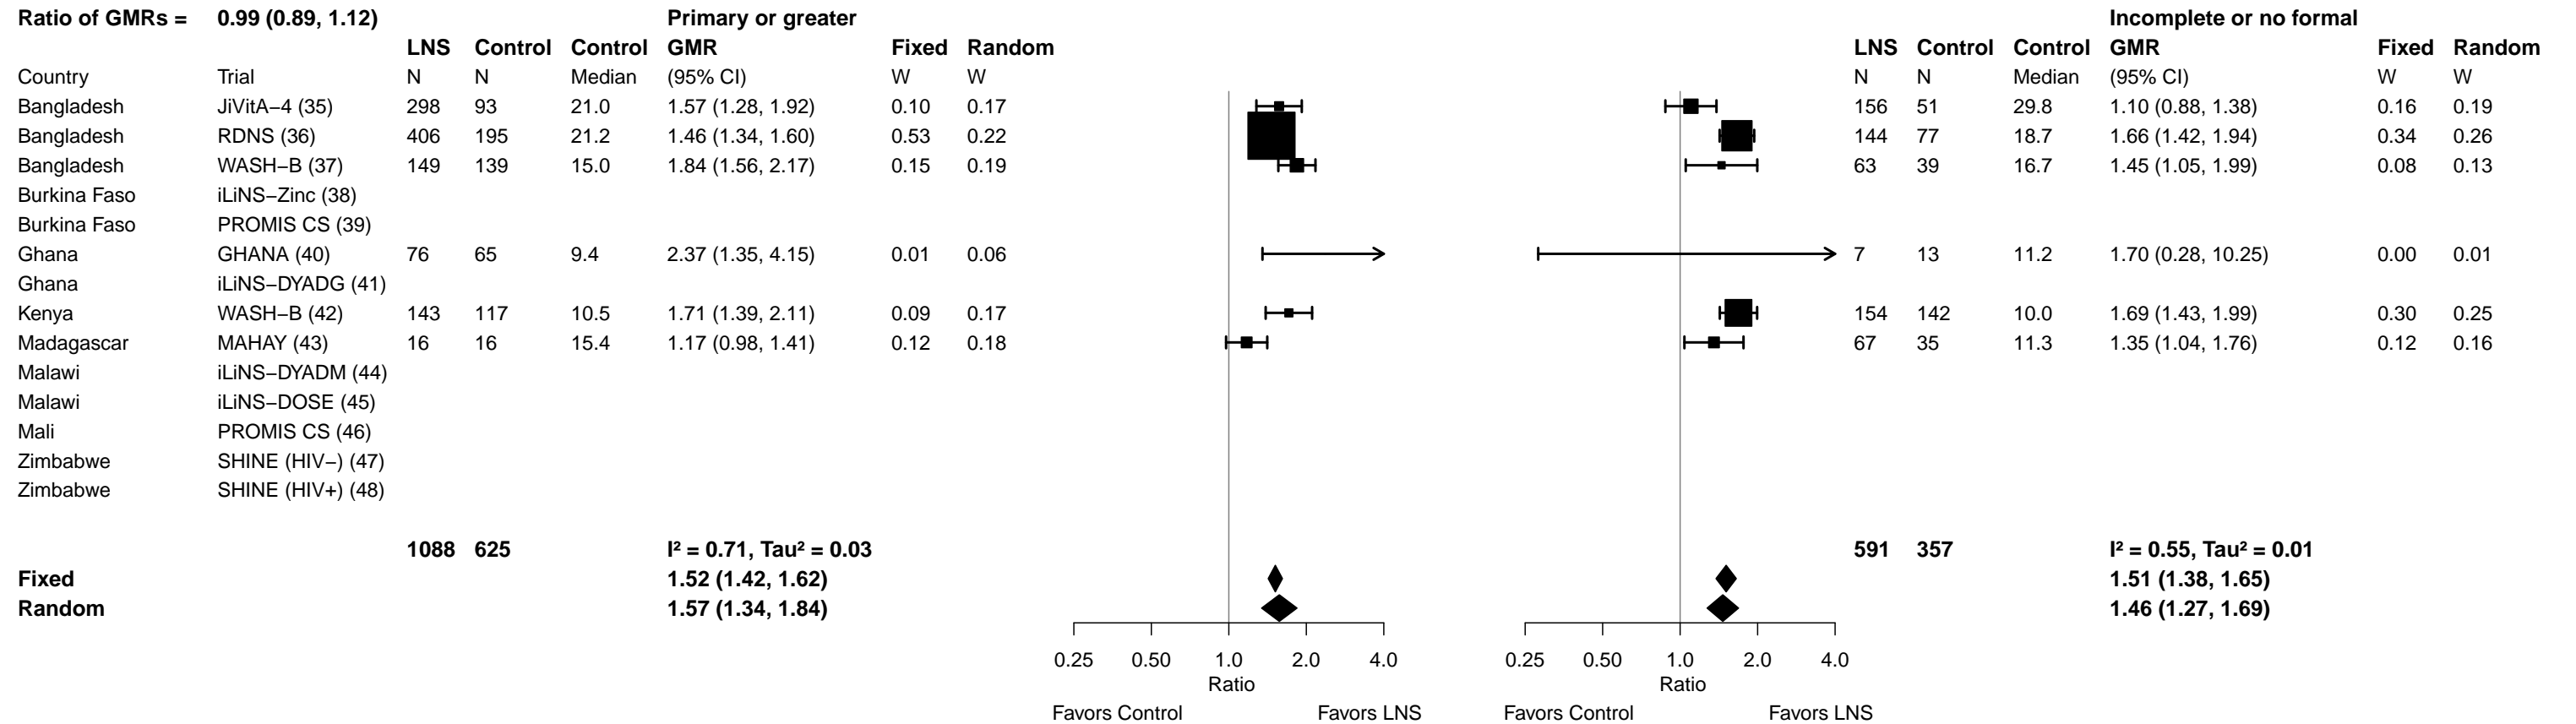

Supplemental figure 6F: Geometric mean ratio of ferritin concentration

6F4: Stratified by Child sex

**P-for-interaction = 0.649**  
**Ratio of GMRs = 0.98 (0.88, 1.08)**

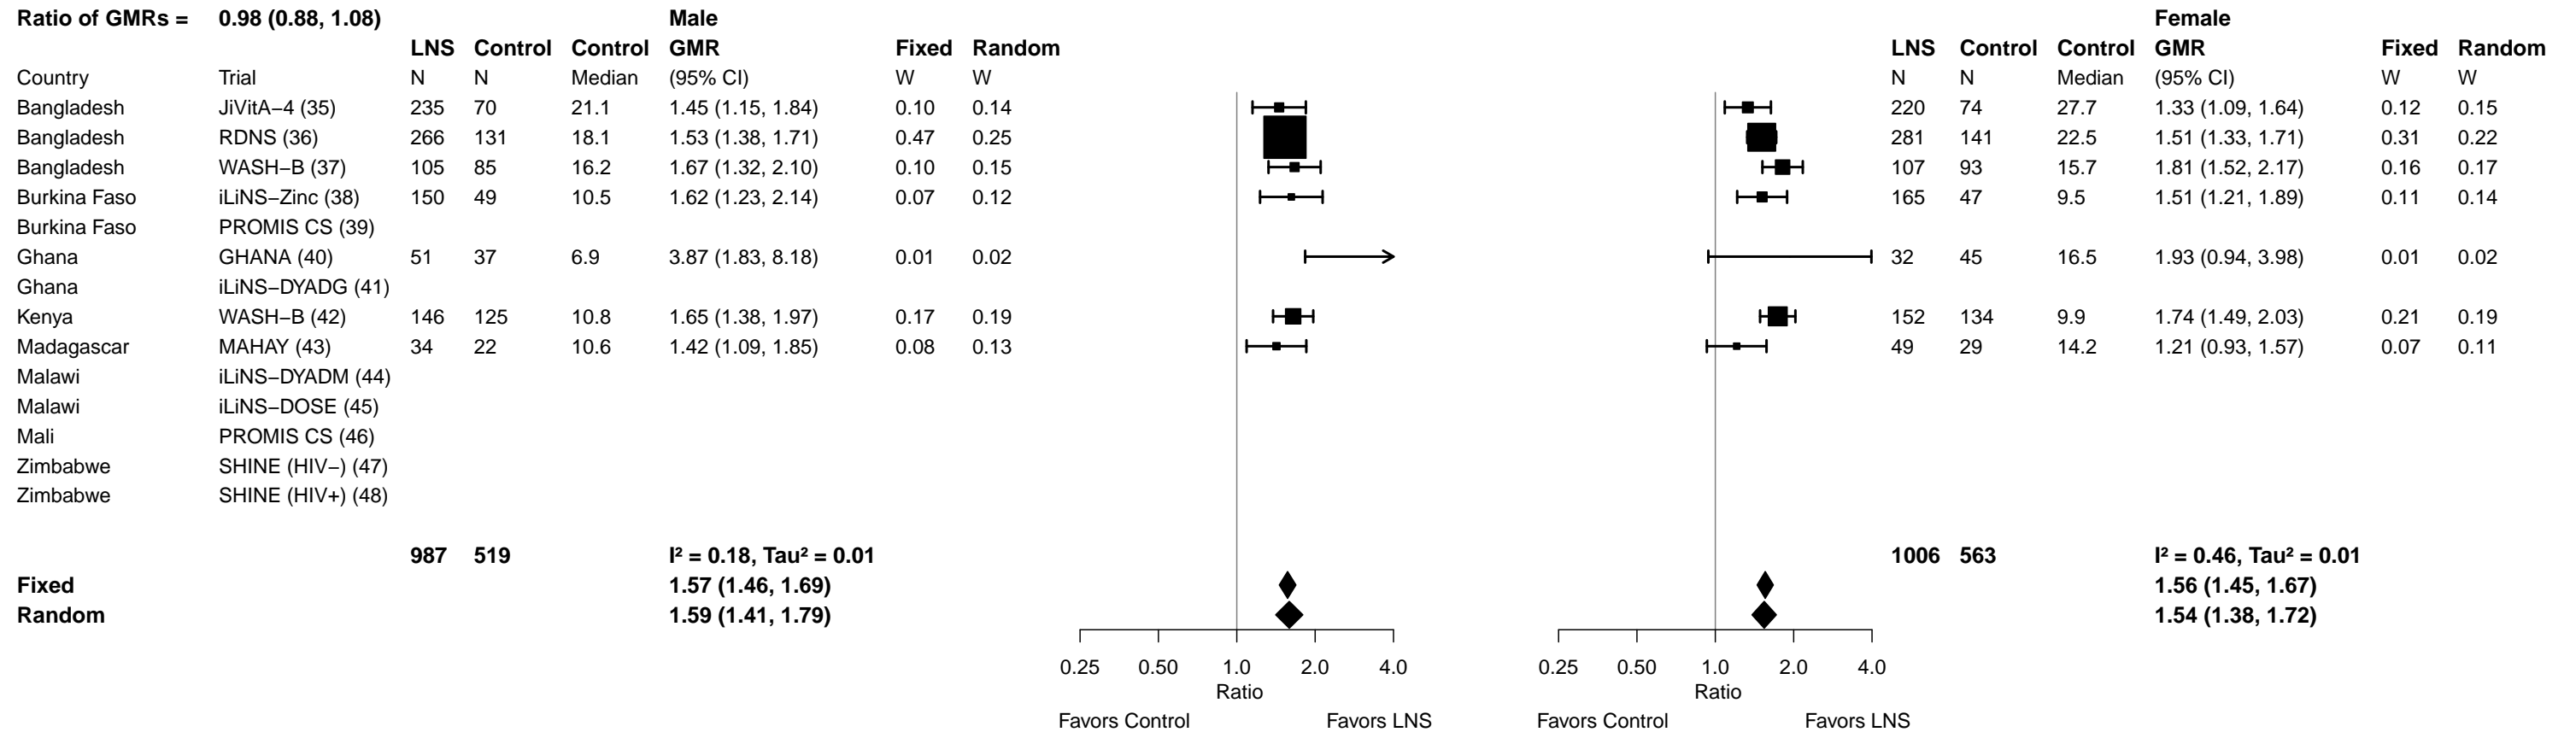

Supplemental figure 6F: Geometric mean ratio of ferritin concentration

6F5: Stratified by Child birth order

**P-for-interaction = 0.040**  
**Ratio of GMRs = 0.88 (0.78, 0.99)**

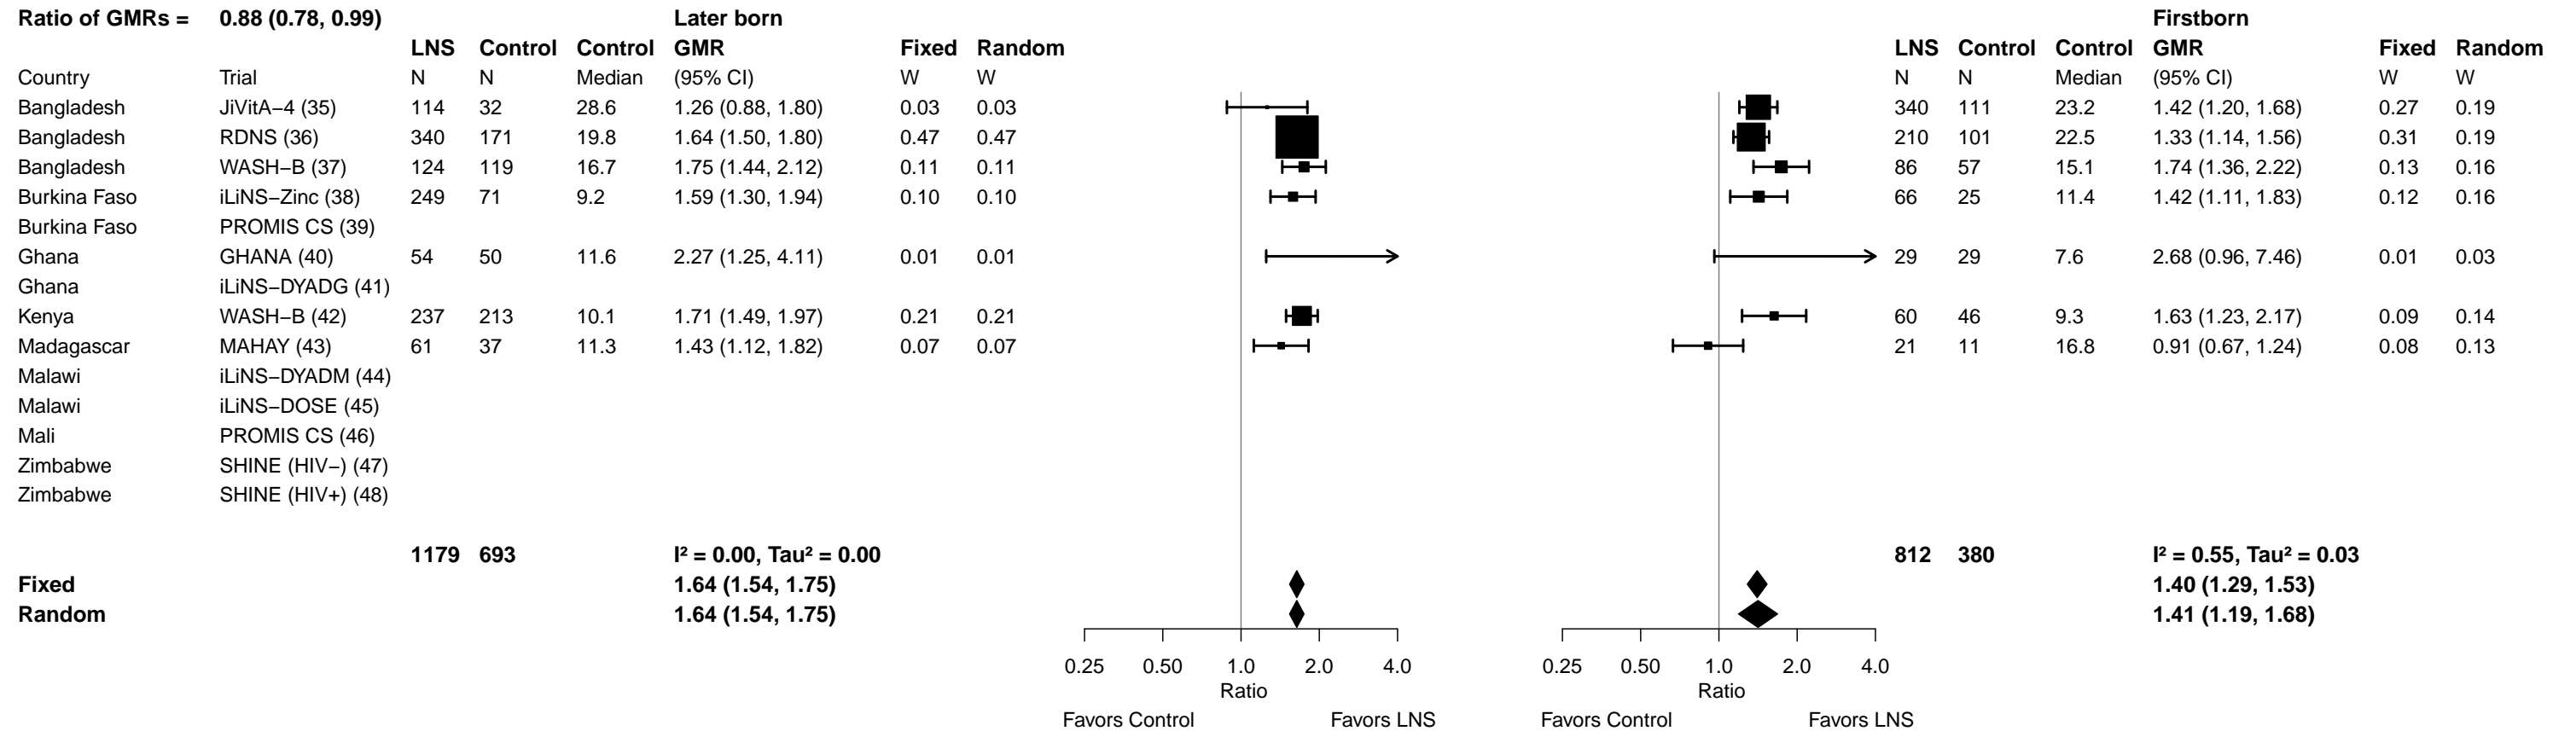

Supplemental figure 6F: Geometric mean ratio of ferritin concentration

6F6: Stratified by Child baseline acute malnutrition

**P-for-interaction = 0.023**  
**Ratio of GMRs = 1.27 (1.03, 1.56)**

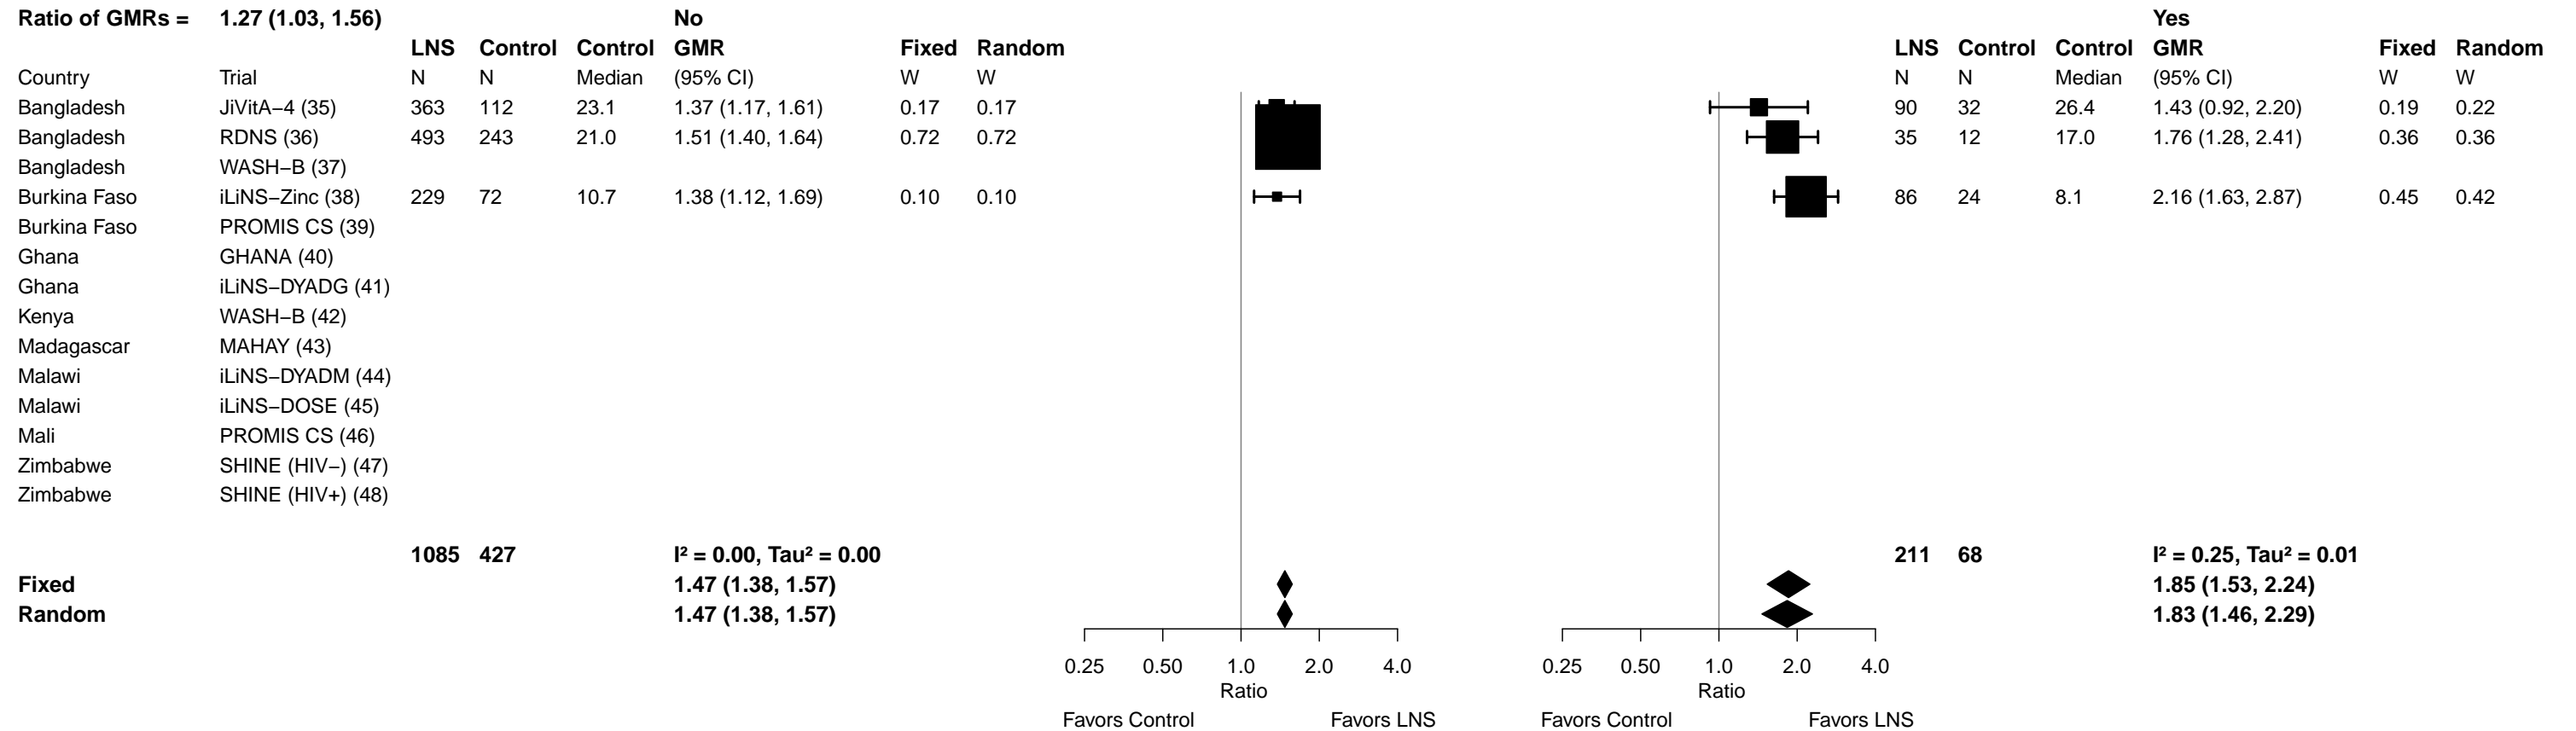



**Supplemental figure 6F: Geometric mean ratio of ferritin concentration**

**6F7: Stratified by Child baseline anemia (insufficient comparisons)**

Supplemental figure 6F: Geometric mean ratio of ferritin concentration

6F8: Stratified by Child high-dose vitamin A supplementation

**P-for-interaction = 0.348**  
**Ratio of GMRs = 1.08 (0.92, 1.27)**

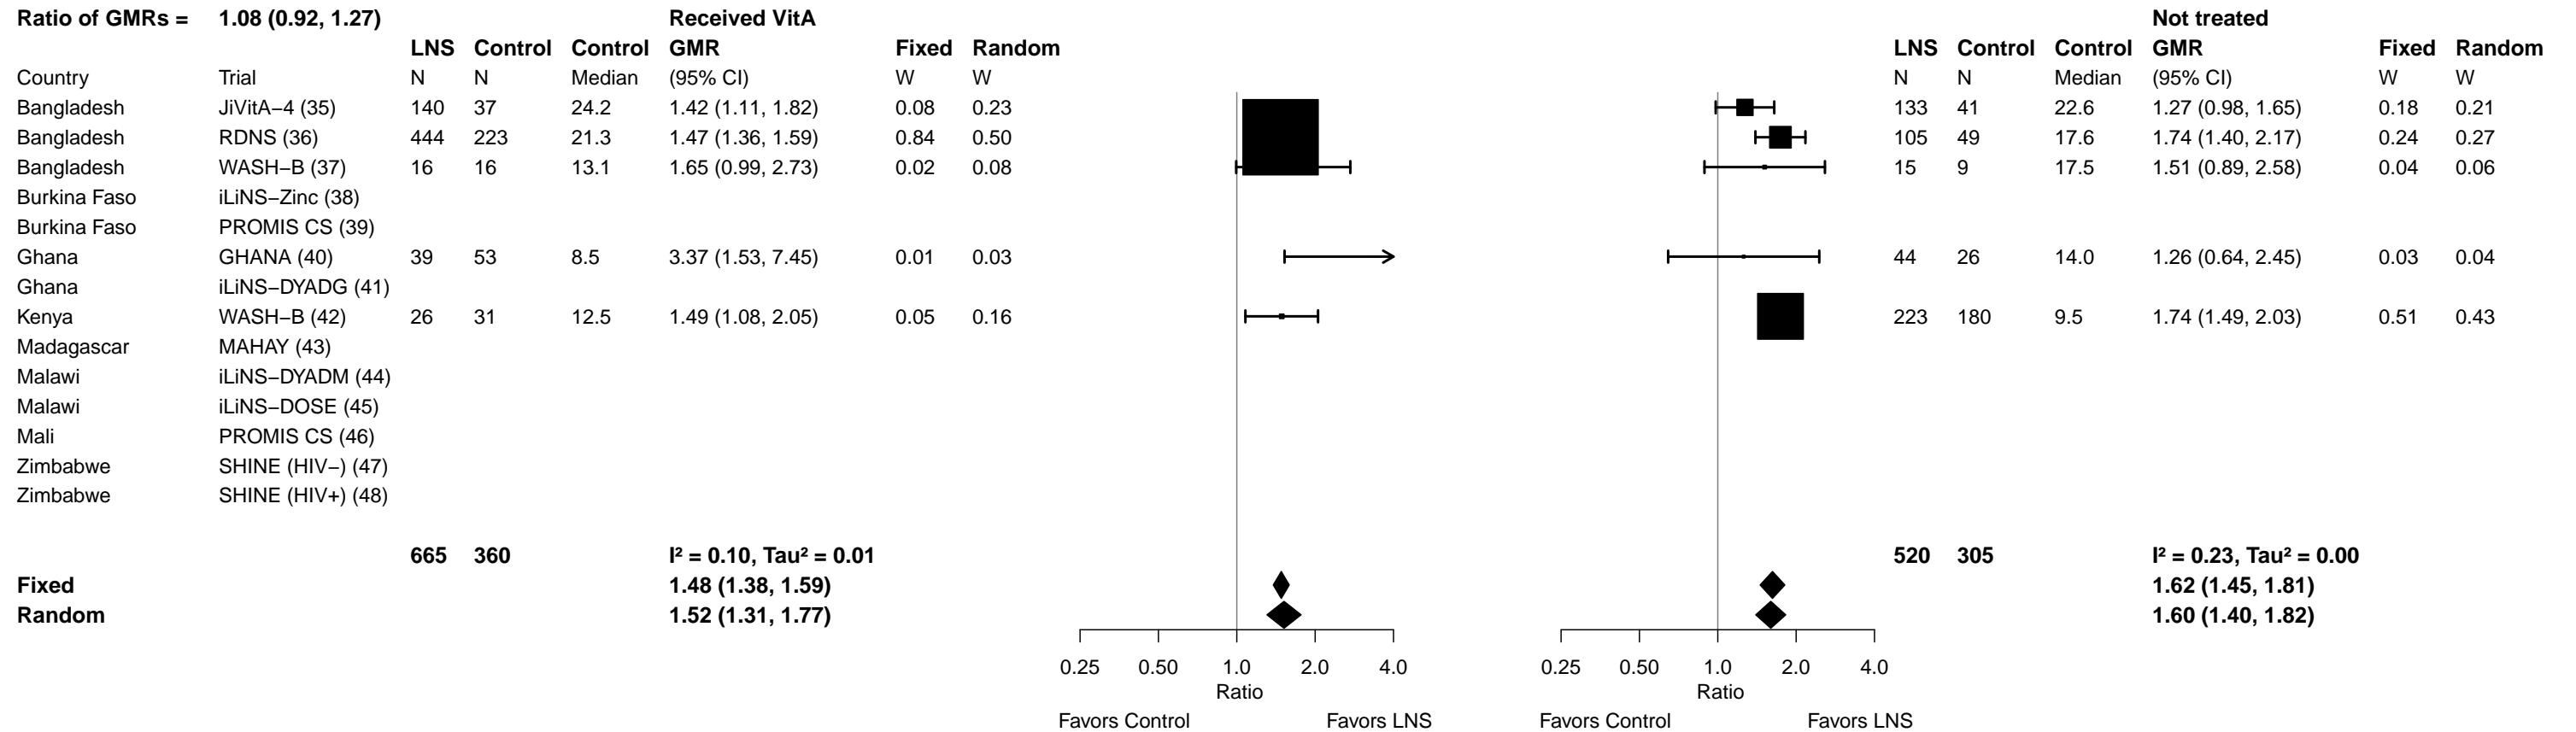

Supplemental figure 6F: Geometric mean ratio of ferritin concentration

6F9: Stratified by Child inflammation

**P-for-interaction = 0.089**  
**Ratio of GMRs = 0.90 (0.81, 1.02)**

|              |                   | Not inflamed |           |                |                   |         |          |
|--------------|-------------------|--------------|-----------|----------------|-------------------|---------|----------|
| Country      | Trial             | LNS N        | Control N | Control Median | GMR (95% CI)      | Fixed W | Random W |
| Bangladesh   | JiVitA-4 (35)     | 185          | 46        | 23.4           | 1.53 (1.09, 2.14) | 0.04    | 0.12     |
| Bangladesh   | RDNS (36)         | 370          | 168       | 19.3           | 1.58 (1.42, 1.77) | 0.39    | 0.18     |
| Bangladesh   | WASH-B (37)       | 165          | 136       | 13.3           | 1.85 (1.61, 2.14) | 0.25    | 0.18     |
| Burkina Faso | iLiNS-Zinc (38)   | 124          | 31        | 9.4            | 1.86 (1.47, 2.35) | 0.09    | 0.15     |
| Burkina Faso | PROMIS CS (39)    |              |           |                |                   |         |          |
| Ghana        | GHANA (40)        | 69           | 66        | 7.6            | 3.35 (1.87, 5.97) | 0.01    | 0.07     |
| Ghana        | iLiNS-DYADG (41)  |              |           |                |                   |         |          |
| Kenya        | WASH-B (42)       | 157          | 135       | 10.1           | 1.56 (1.28, 1.89) | 0.13    | 0.16     |
| Madagascar   | MAHAY (43)        | 44           | 32        | 11.4           | 1.23 (0.97, 1.57) | 0.08    | 0.15     |
| Malawi       | iLiNS-DYADM (44)  |              |           |                |                   |         |          |
| Malawi       | iLiNS-DOSE (45)   |              |           |                |                   |         |          |
| Mali         | PROMIS CS (46)    |              |           |                |                   |         |          |
| Zimbabwe     | SHINE (HIV-) (47) |              |           |                |                   |         |          |
| Zimbabwe     | SHINE (HIV+) (48) |              |           |                |                   |         |          |

**Fixed**  
**Random**

**1114 614**

**I<sup>2</sup> = 0.63, Tau<sup>2</sup> = 0.04**  
**1.65 (1.53, 1.76)**  
**1.68 (1.40, 2.01)**

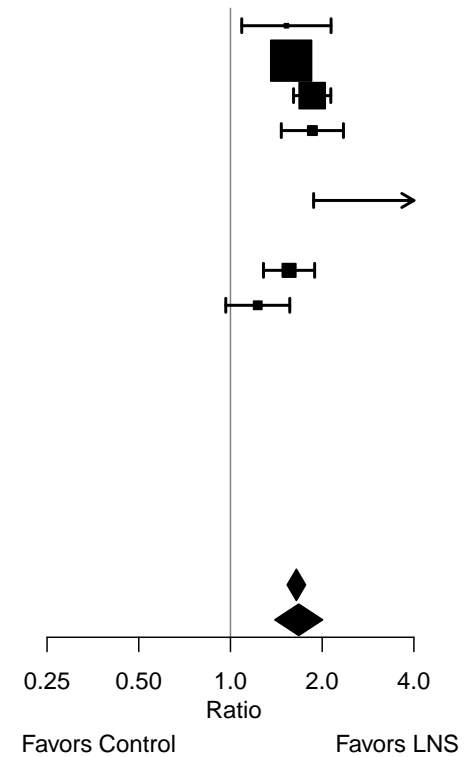

|              |                   | High AGP or CRP |           |                |                   |         |          |
|--------------|-------------------|-----------------|-----------|----------------|-------------------|---------|----------|
| Country      | Trial             | LNS N           | Control N | Control Median | GMR (95% CI)      | Fixed W | Random W |
| Bangladesh   | JiVitA-4 (35)     | 270             | 98        | 24.4           | 1.31 (1.08, 1.60) | 0.16    | 0.18     |
| Bangladesh   | RDNS (36)         | 180             | 104       | 21.9           | 1.41 (1.23, 1.61) | 0.34    | 0.25     |
| Bangladesh   | WASH-B (37)       | 47              | 42        | 20.0           | 1.42 (1.04, 1.93) | 0.07    | 0.10     |
| Burkina Faso | iLiNS-Zinc (38)   | 191             | 65        | 9.7            | 1.40 (1.12, 1.76) | 0.12    | 0.15     |
| Burkina Faso | PROMIS CS (39)    |                 |           |                |                   |         |          |
| Ghana        | GHANA (40)        | 14              | 16        | 33.0           | 0.79 (0.28, 2.22) | 0.01    | 0.01     |
| Ghana        | iLiNS-DYADG (41)  |                 |           |                |                   |         |          |
| Kenya        | WASH-B (42)       | 141             | 124       | 10.0           | 1.86 (1.58, 2.18) | 0.24    | 0.22     |
| Madagascar   | MAHAY (43)        | 39              | 19        | 16.1           | 1.36 (0.98, 1.89) | 0.06    | 0.09     |
| Malawi       | iLiNS-DYADM (44)  |                 |           |                |                   |         |          |
| Malawi       | iLiNS-DOSE (45)   |                 |           |                |                   |         |          |
| Mali         | PROMIS CS (46)    |                 |           |                |                   |         |          |
| Zimbabwe     | SHINE (HIV-) (47) |                 |           |                |                   |         |          |
| Zimbabwe     | SHINE (HIV+) (48) |                 |           |                |                   |         |          |

**Fixed**  
**Random**

**882 468**

**I<sup>2</sup> = 0.48, Tau<sup>2</sup> = 0.01**  
**1.48 (1.37, 1.60)**  
**1.46 (1.31, 1.64)**

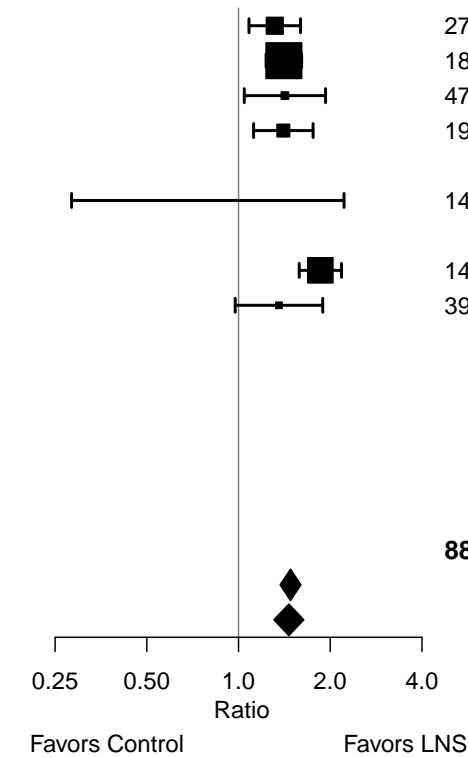

### Supplemental figure 6G: Iron deficiency (ferritin < 12 µg/L) prevalence ratio

#### 6G1: Stratified by Maternal BMI

P-for-interaction = 0.786

Ratio of PRs = 0.96 (0.71, 1.30)

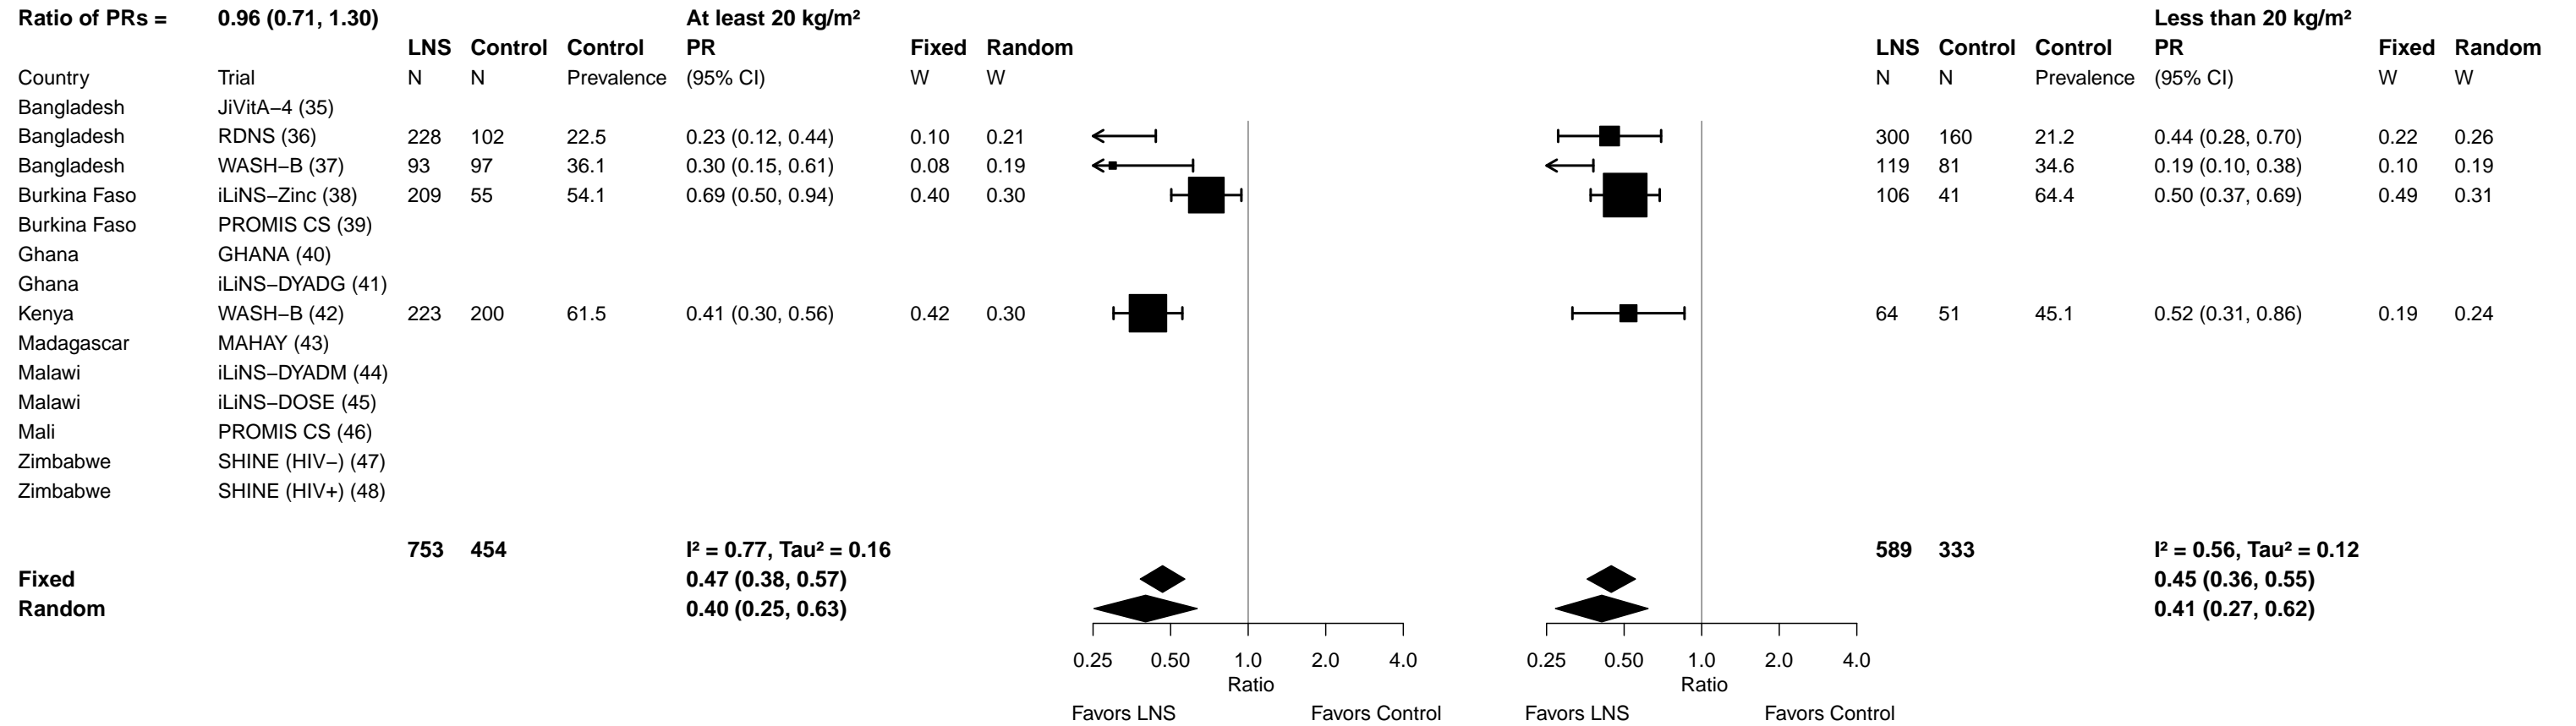

Supplemental figure 6G: Iron deficiency (ferritin < 12 µg/L) prevalence ratio

6G2: Stratified by Maternal age

P-for-interaction = 0.131

Ratio of PRs = 1.19 (0.95, 1.48)

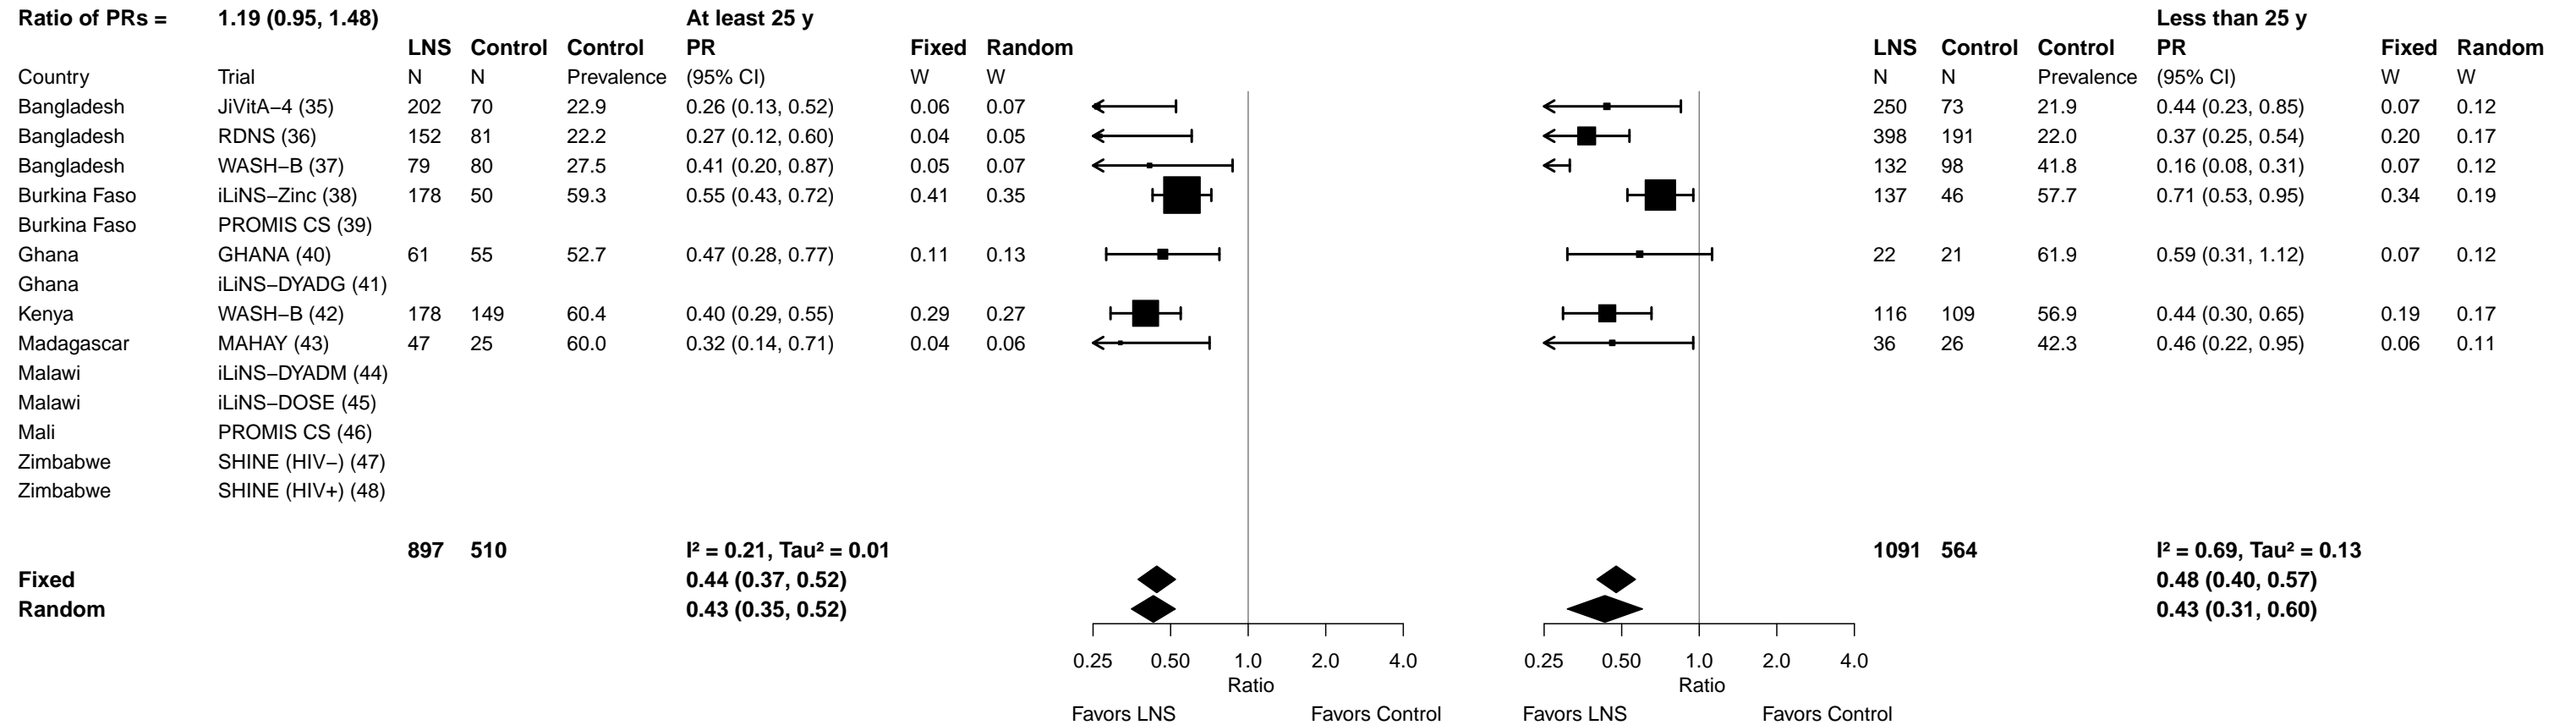

Supplemental figure 6G: Iron deficiency (ferritin < 12 µg/L) prevalence ratio

6G3: Stratified by Maternal education

P-for-interaction = 0.783

Ratio of PRs = 0.95 (0.66, 1.37)

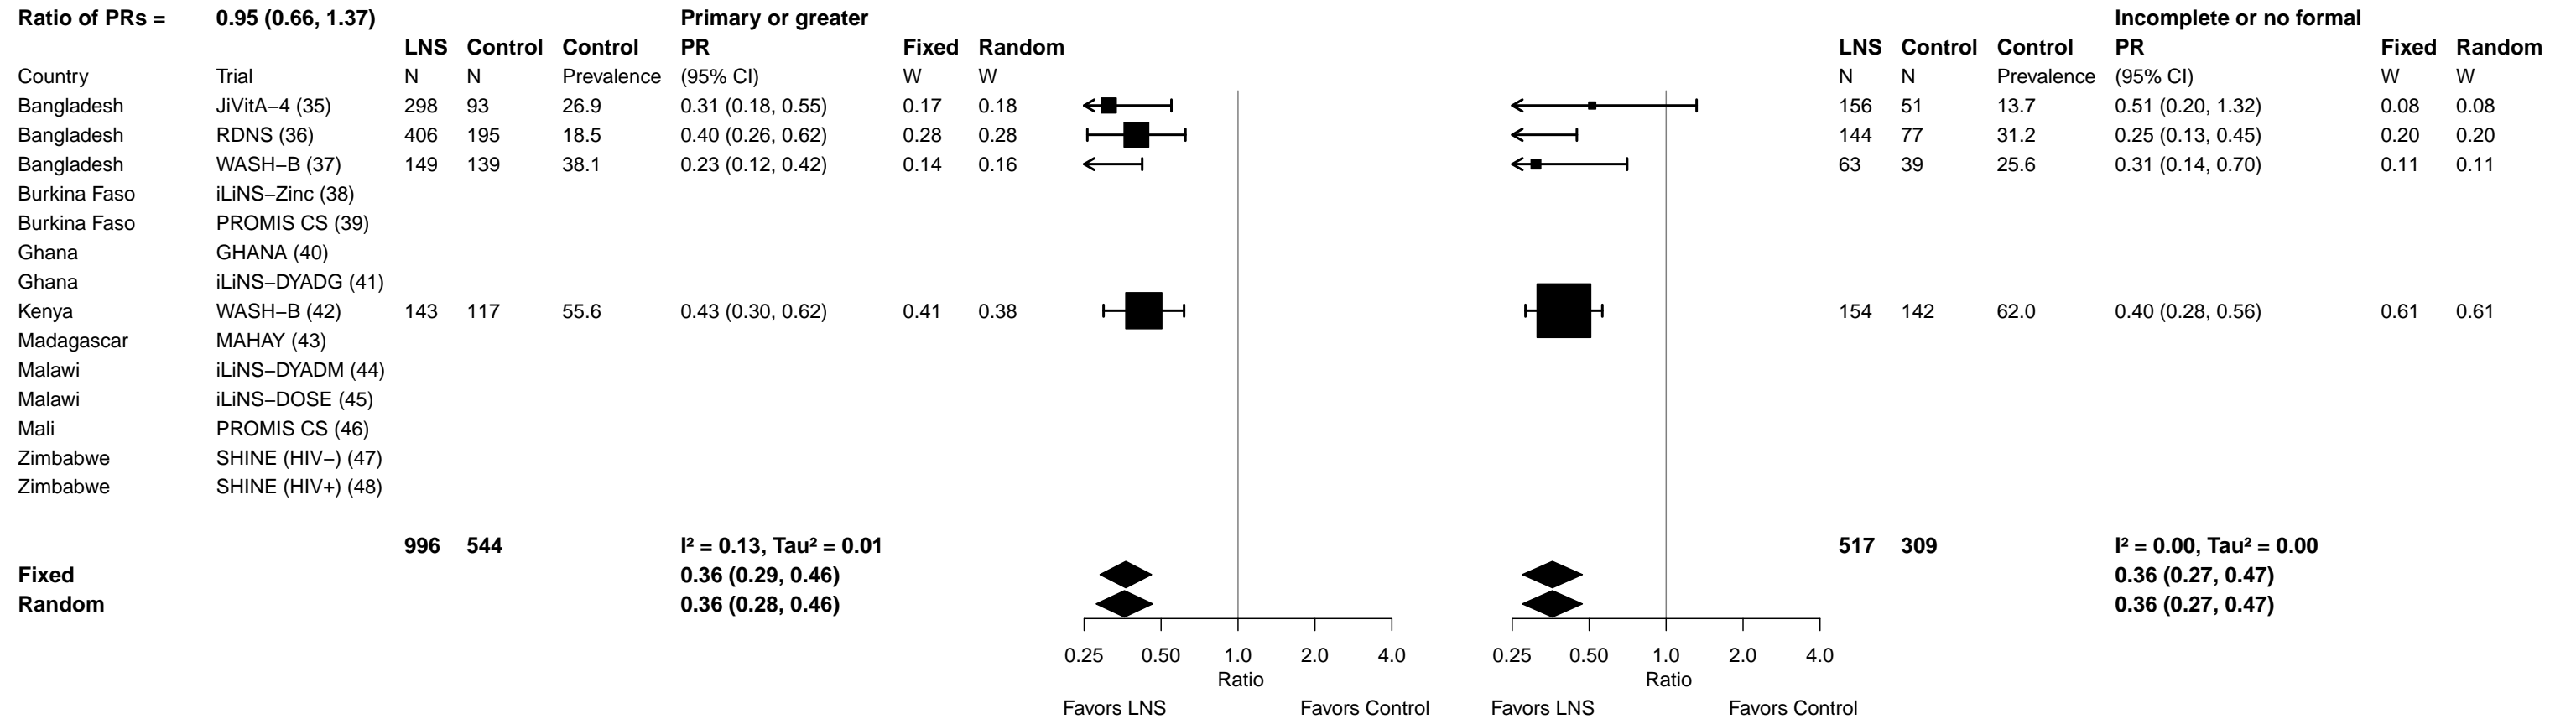

Supplemental figure 6G: Iron deficiency (ferritin < 12 µg/L) prevalence ratio

6G4: Stratified by Child sex

P-for-interaction = 0.771

Ratio of PRs = 1.04 (0.80, 1.36)

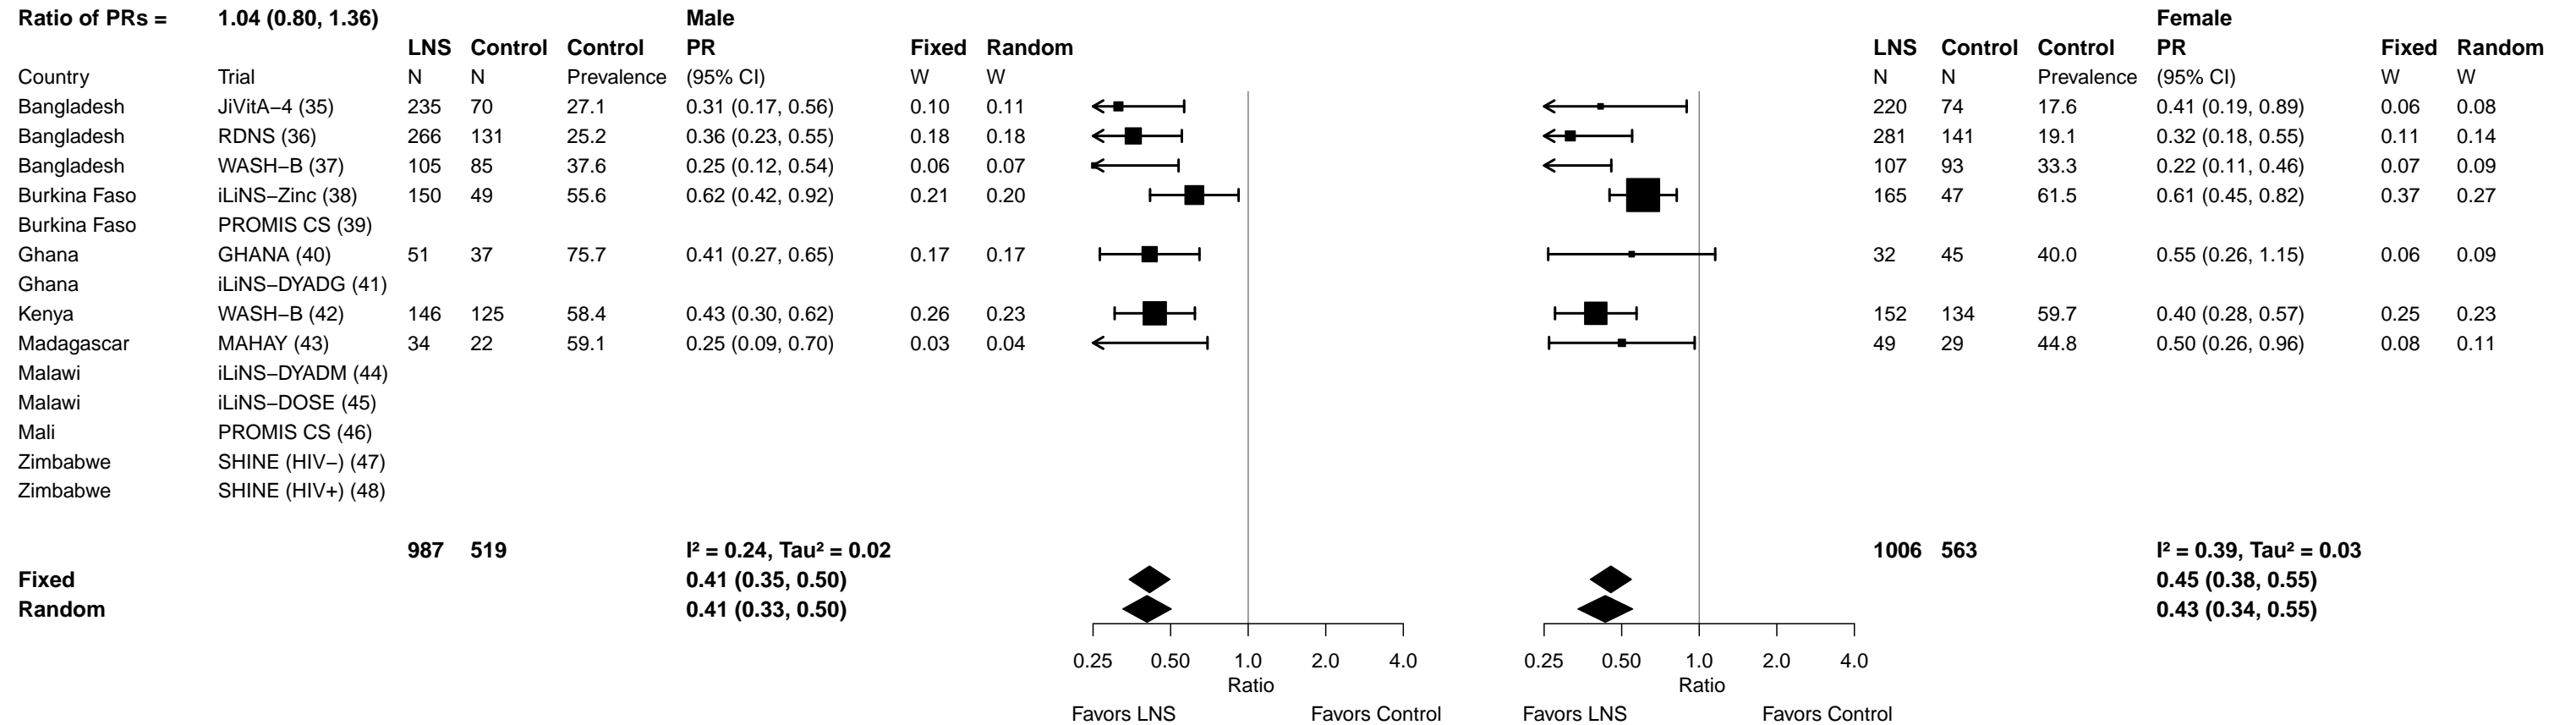

Supplemental figure 6G: Iron deficiency (ferritin < 12 µg/L) prevalence ratio

6G5: Stratified by Child birth order

P-for-interaction = 0.101

Ratio of PRs = 1.22 (0.96, 1.56)

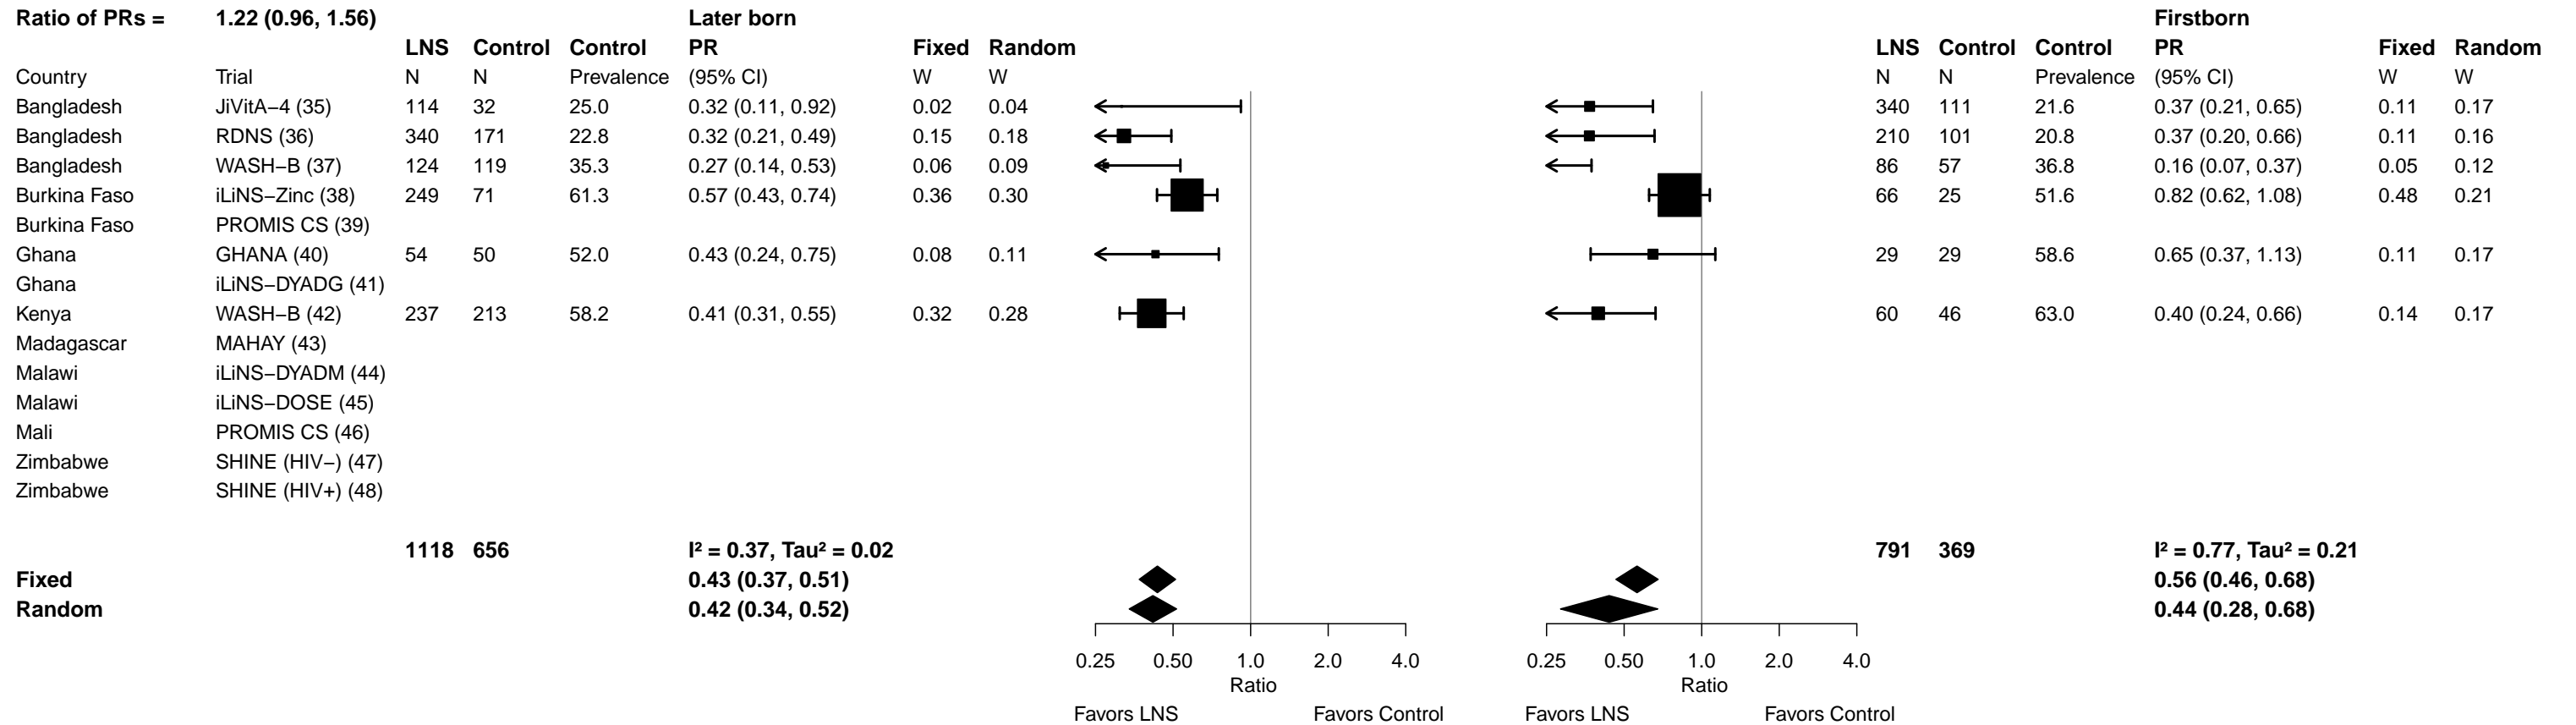



**Supplemental figure 6G: Iron deficiency (ferritin < 12 µg/L) prevalence ratio**

**6G6: Stratified by Child baseline acute malnutrition (insufficient comparisons)**

**Supplemental figure 6G: Iron deficiency (ferritin < 12 µg/L) prevalence ratio**

**6G7: Stratified by Child baseline anemia (insufficient comparisons)**



Supplemental figure 6G: Iron deficiency (ferritin < 12 µg/L) prevalence ratio

6G9: Stratified by Child inflammation

P-for-interaction = 0.951

Ratio of PRs = 0.99 (0.74, 1.33)

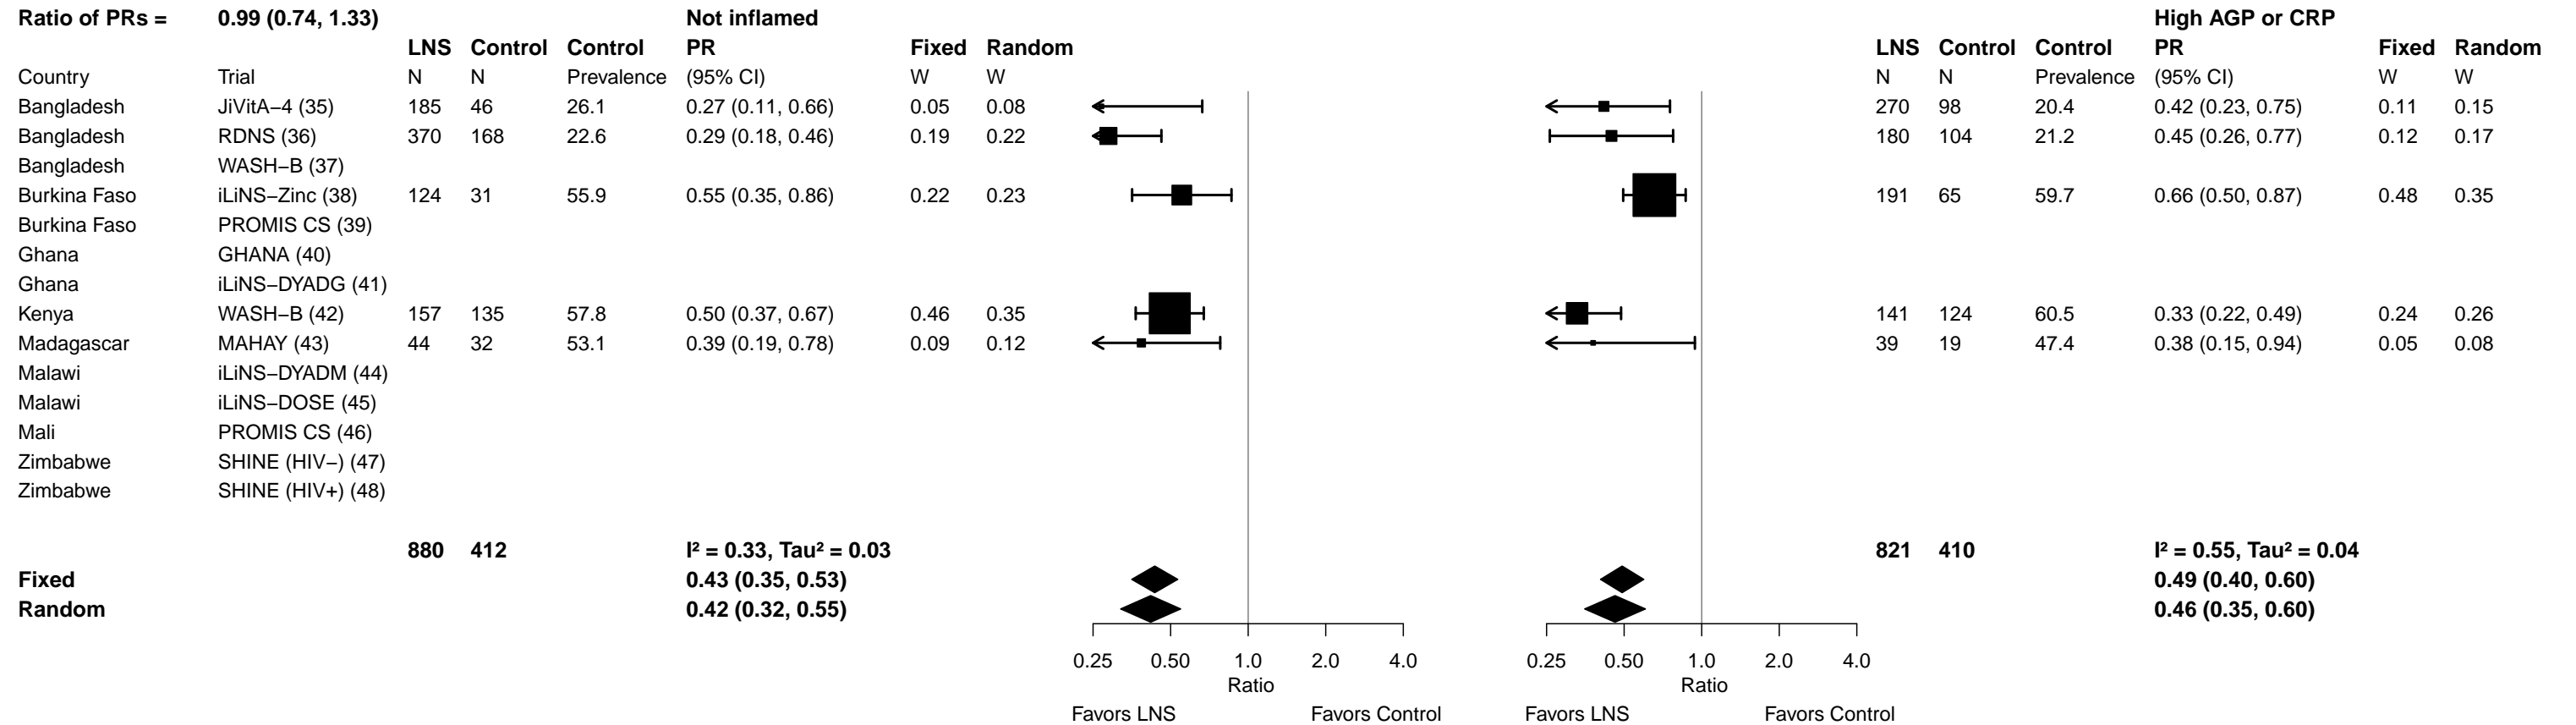



Supplemental figure 6H: Iron deficiency (ferritin < 12 µg/L) prevalence difference

6H2: Stratified by Maternal age

P-for-interaction = 0.779

Difference in PDs = 0.01 (-0.06, 0.07)

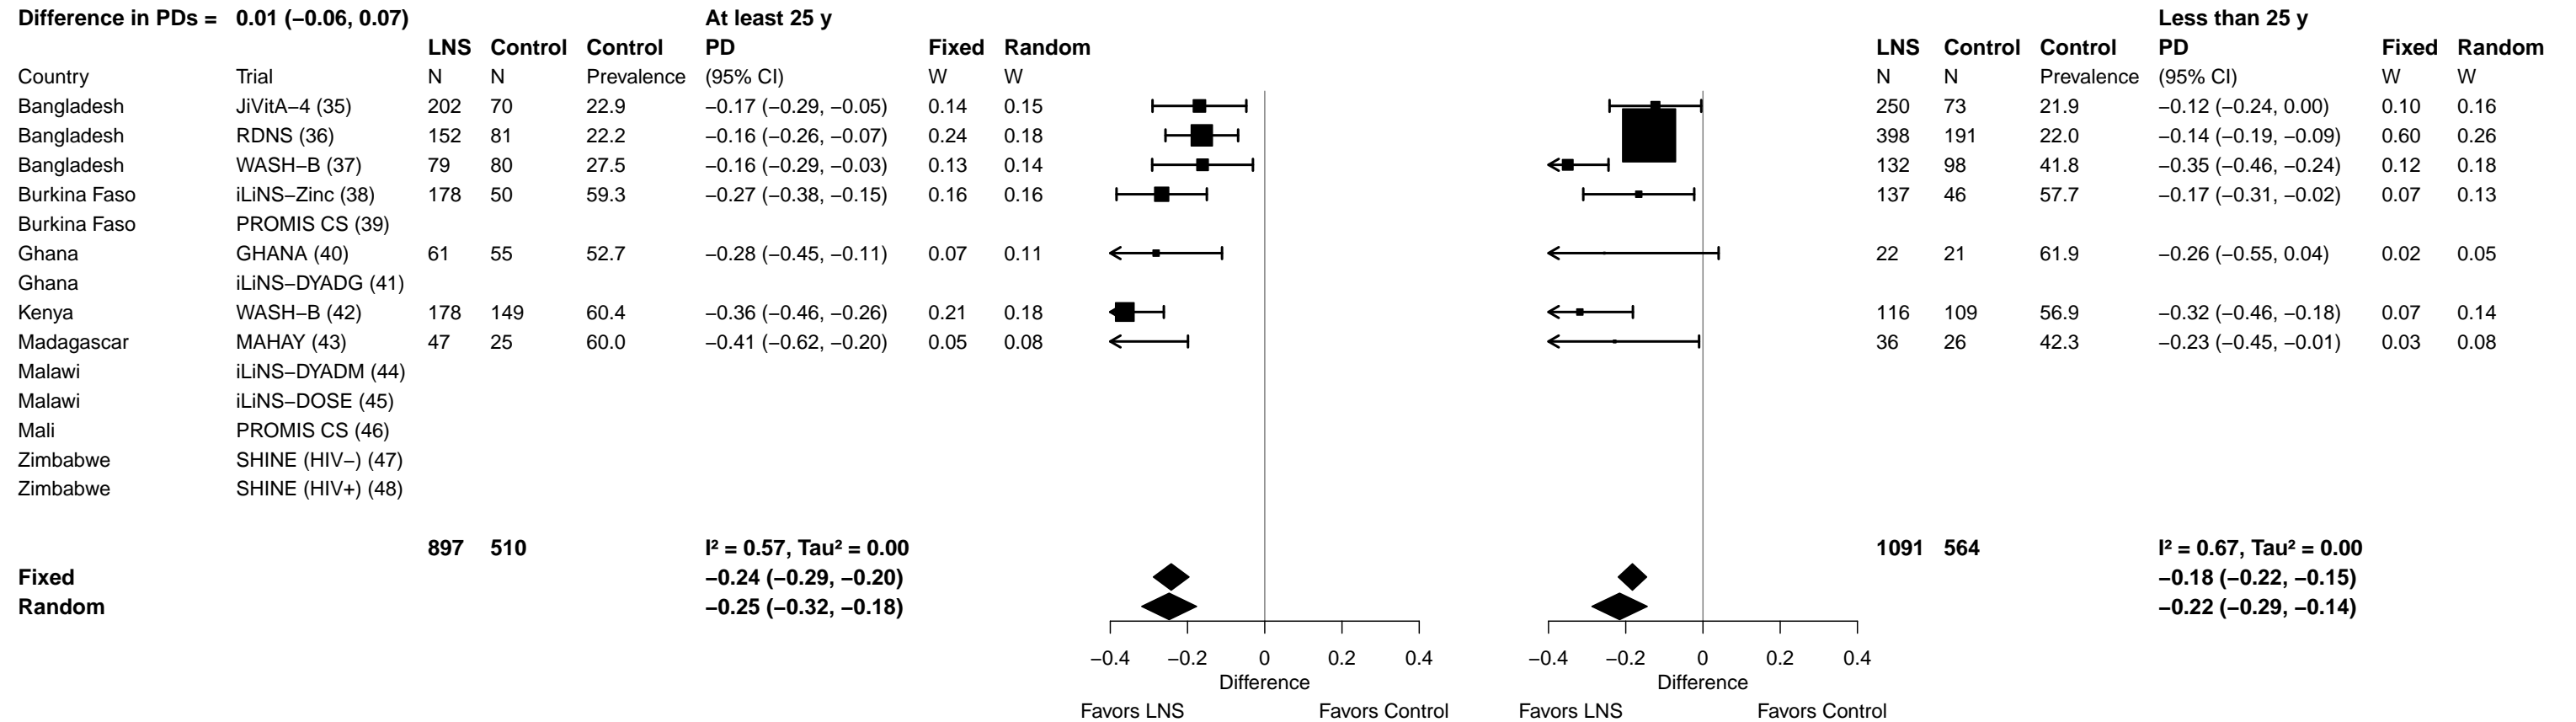

Supplemental figure 6H: Iron deficiency (ferritin < 12 µg/L) prevalence difference

6H3: Stratified by Maternal education

P-for-interaction = 0.963

Difference in PDs = 0.00 (-0.08, 0.07)

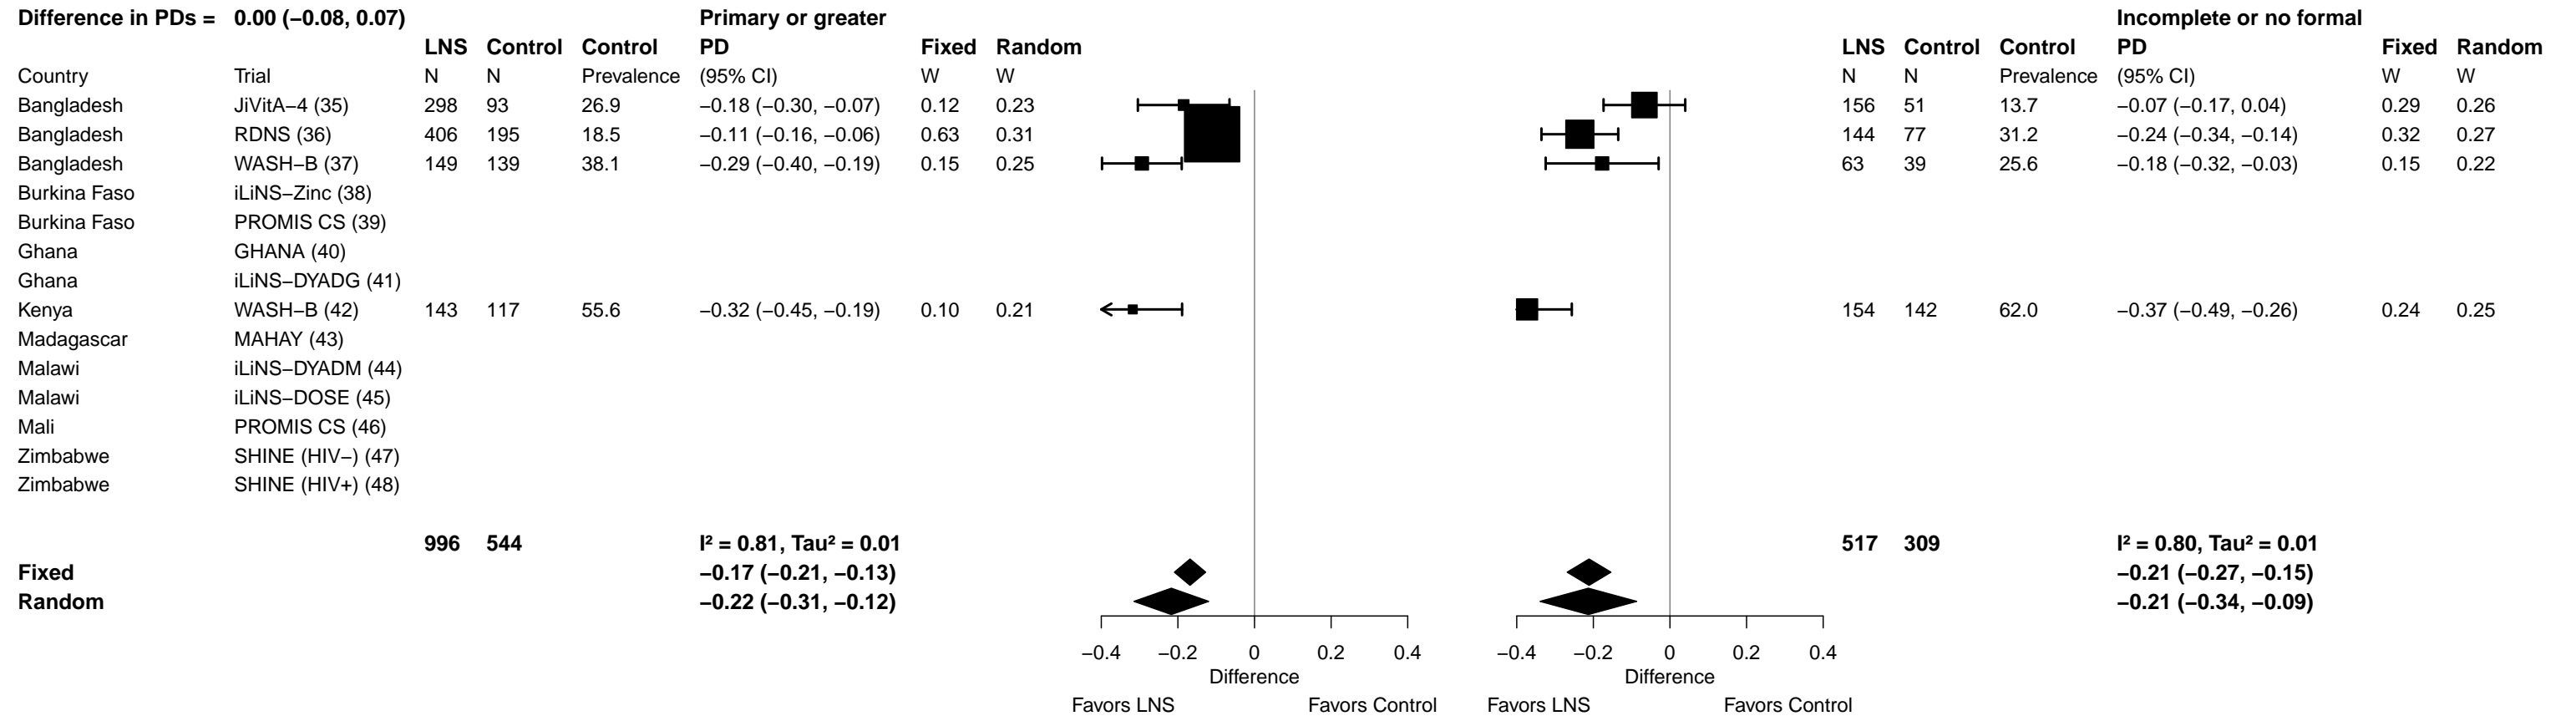

Supplemental figure 6H: Iron deficiency (ferritin < 12 µg/L) prevalence difference

6H4: Stratified by Child sex

P-for-interaction = 0.179

Difference in PDs = 0.04 (-0.02, 0.11)

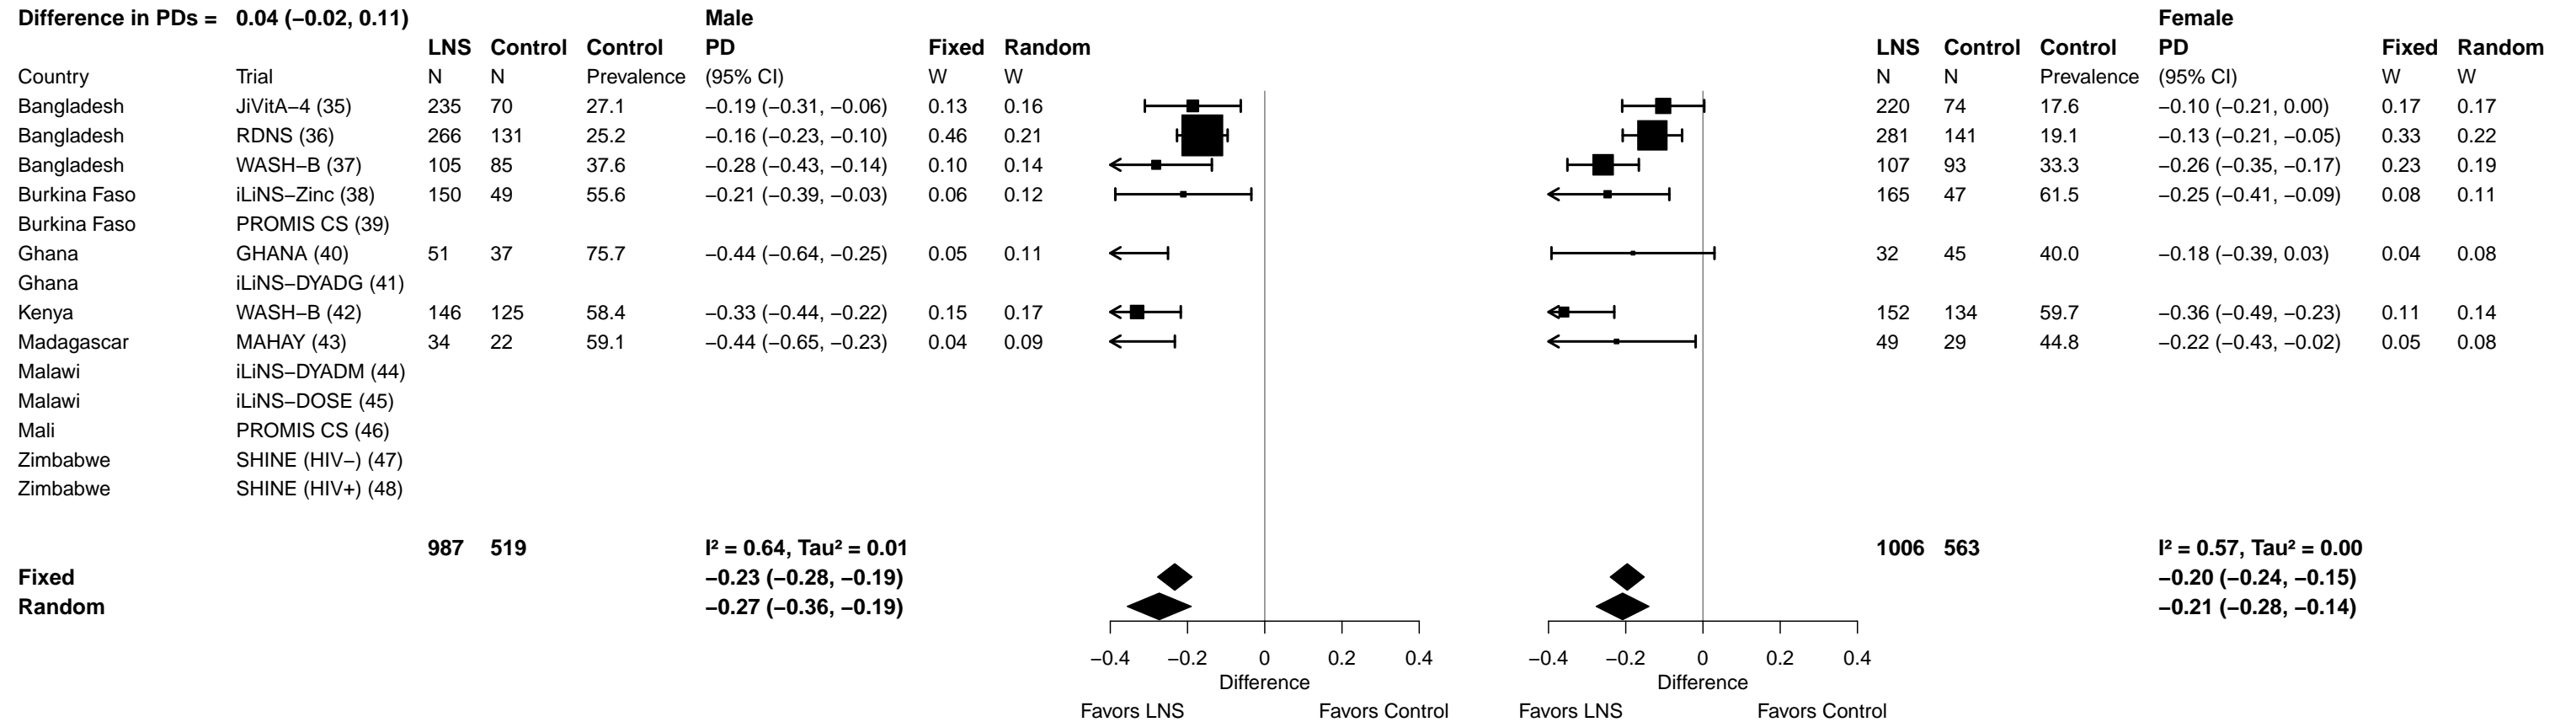



Supplemental figure 6H: Iron deficiency (ferritin < 12 µg/L) prevalence difference

6H5: Stratified by Child birth order

P-for-interaction = 0.638

Difference in PDs = 0.02 (-0.05, 0.09)

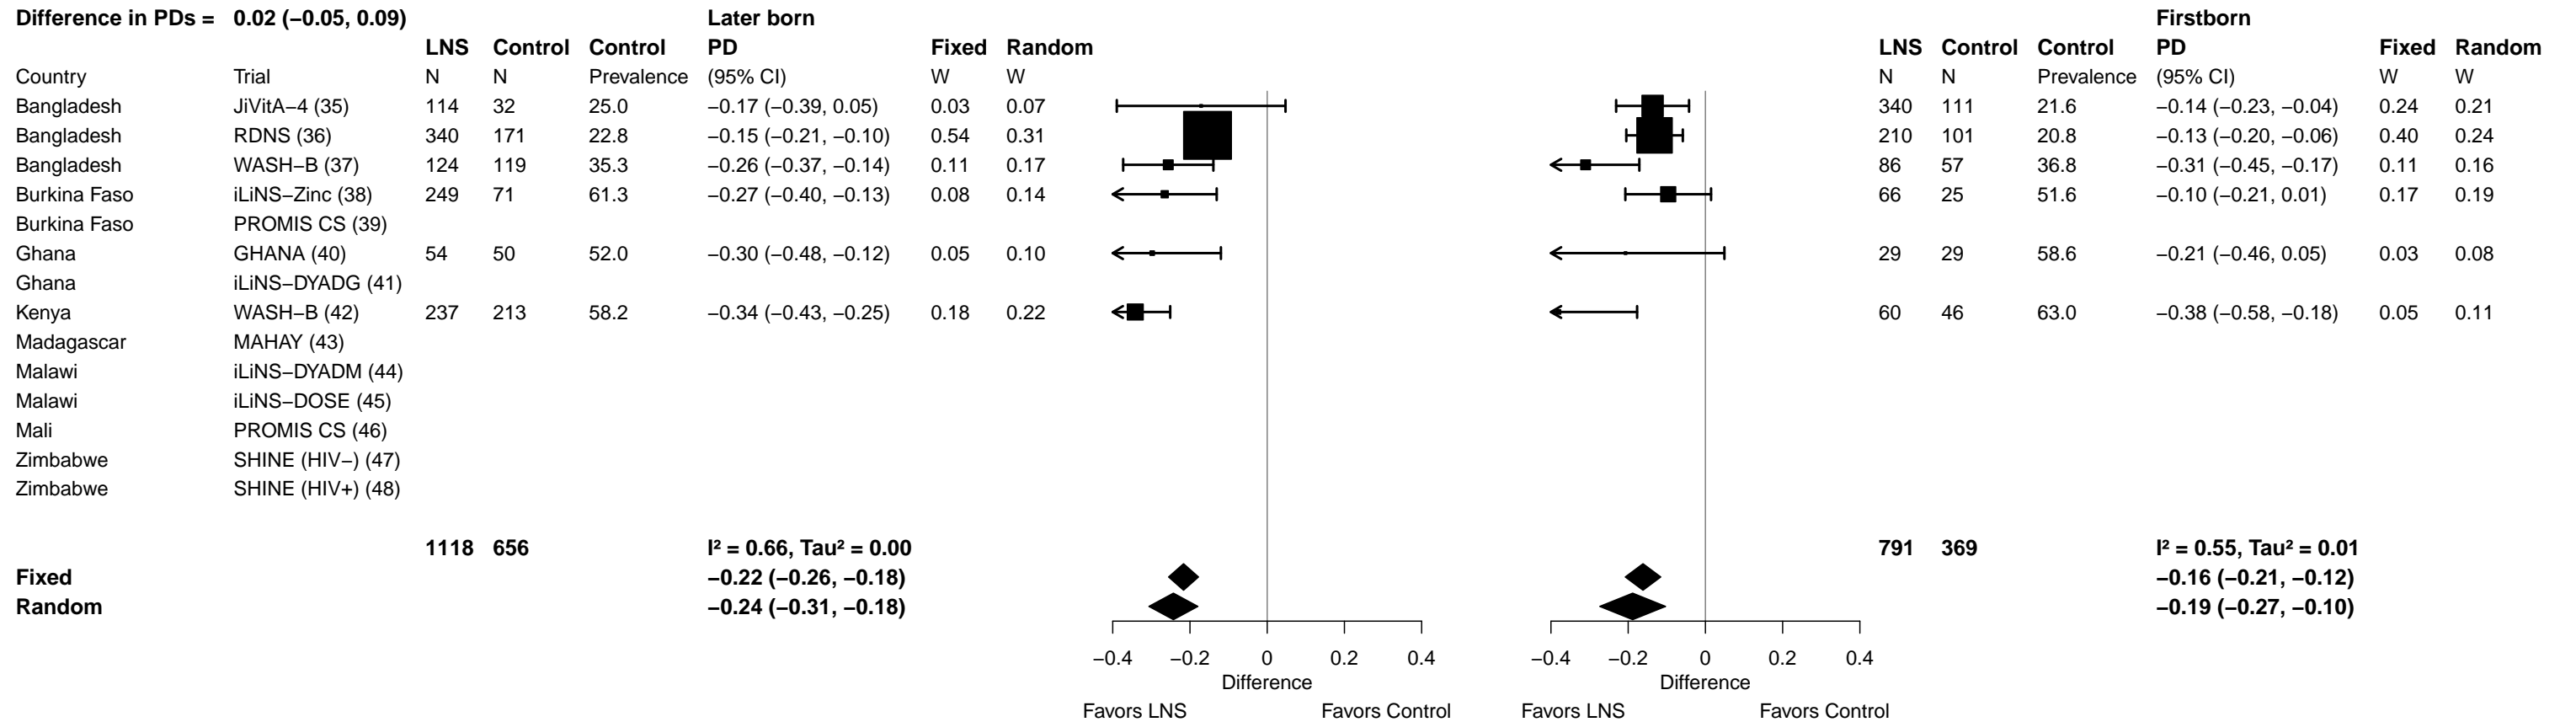

**Supplemental figure 6H: Iron deficiency (ferritin < 12 µg/L) prevalence difference**

**6H6: Stratified by Child baseline acute malnutrition (insufficient comparisons)**

**Supplemental figure 6H: Iron deficiency (ferritin < 12 µg/L) prevalence difference**

**6H7: Stratified by Child baseline anemia (insufficient comparisons)**

Supplemental figure 6H: Iron deficiency (ferritin < 12 µg/L) prevalence difference

6H8: Stratified by Child high-dose vitamin A supplementation

P-for-interaction = 0.999

Difference in PDs = 0.00 (-0.10, 0.10)

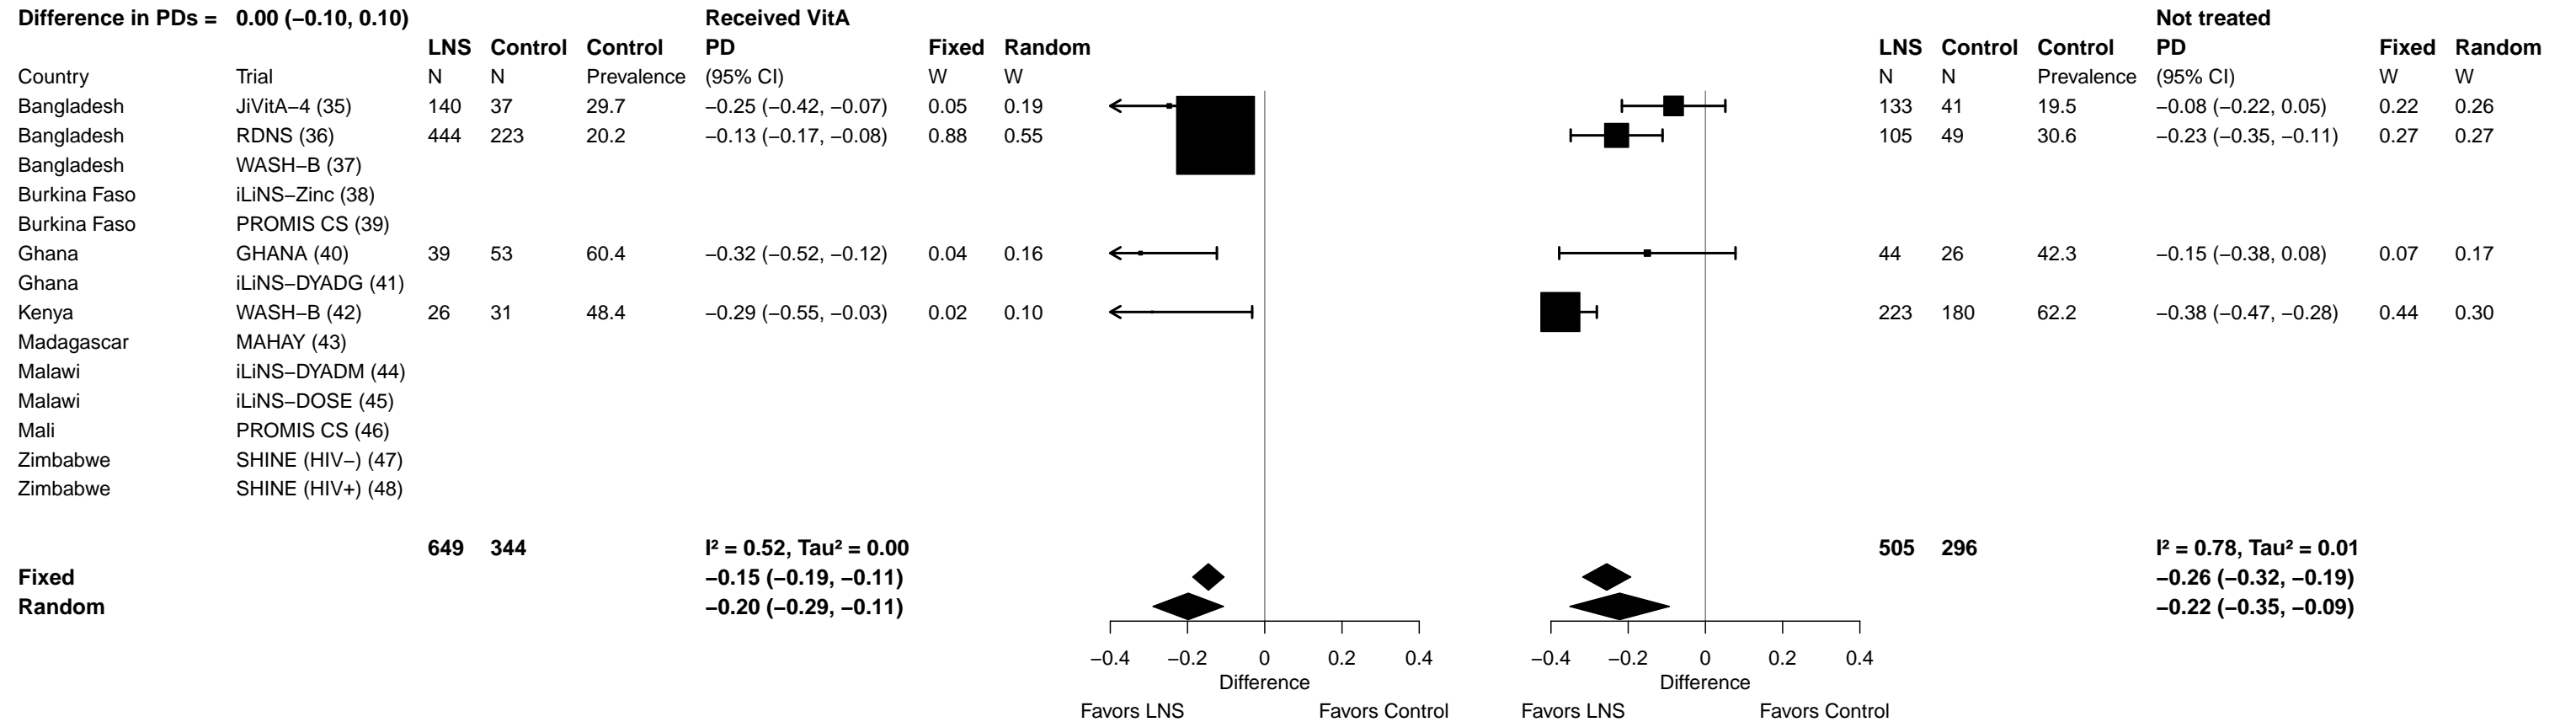

Supplemental figure 6H: Iron deficiency (ferritin < 12 µg/L) prevalence difference

6H9: Stratified by Child inflammation

P-for-interaction = 0.698

Difference in PDs = 0.01 (-0.06, 0.09)

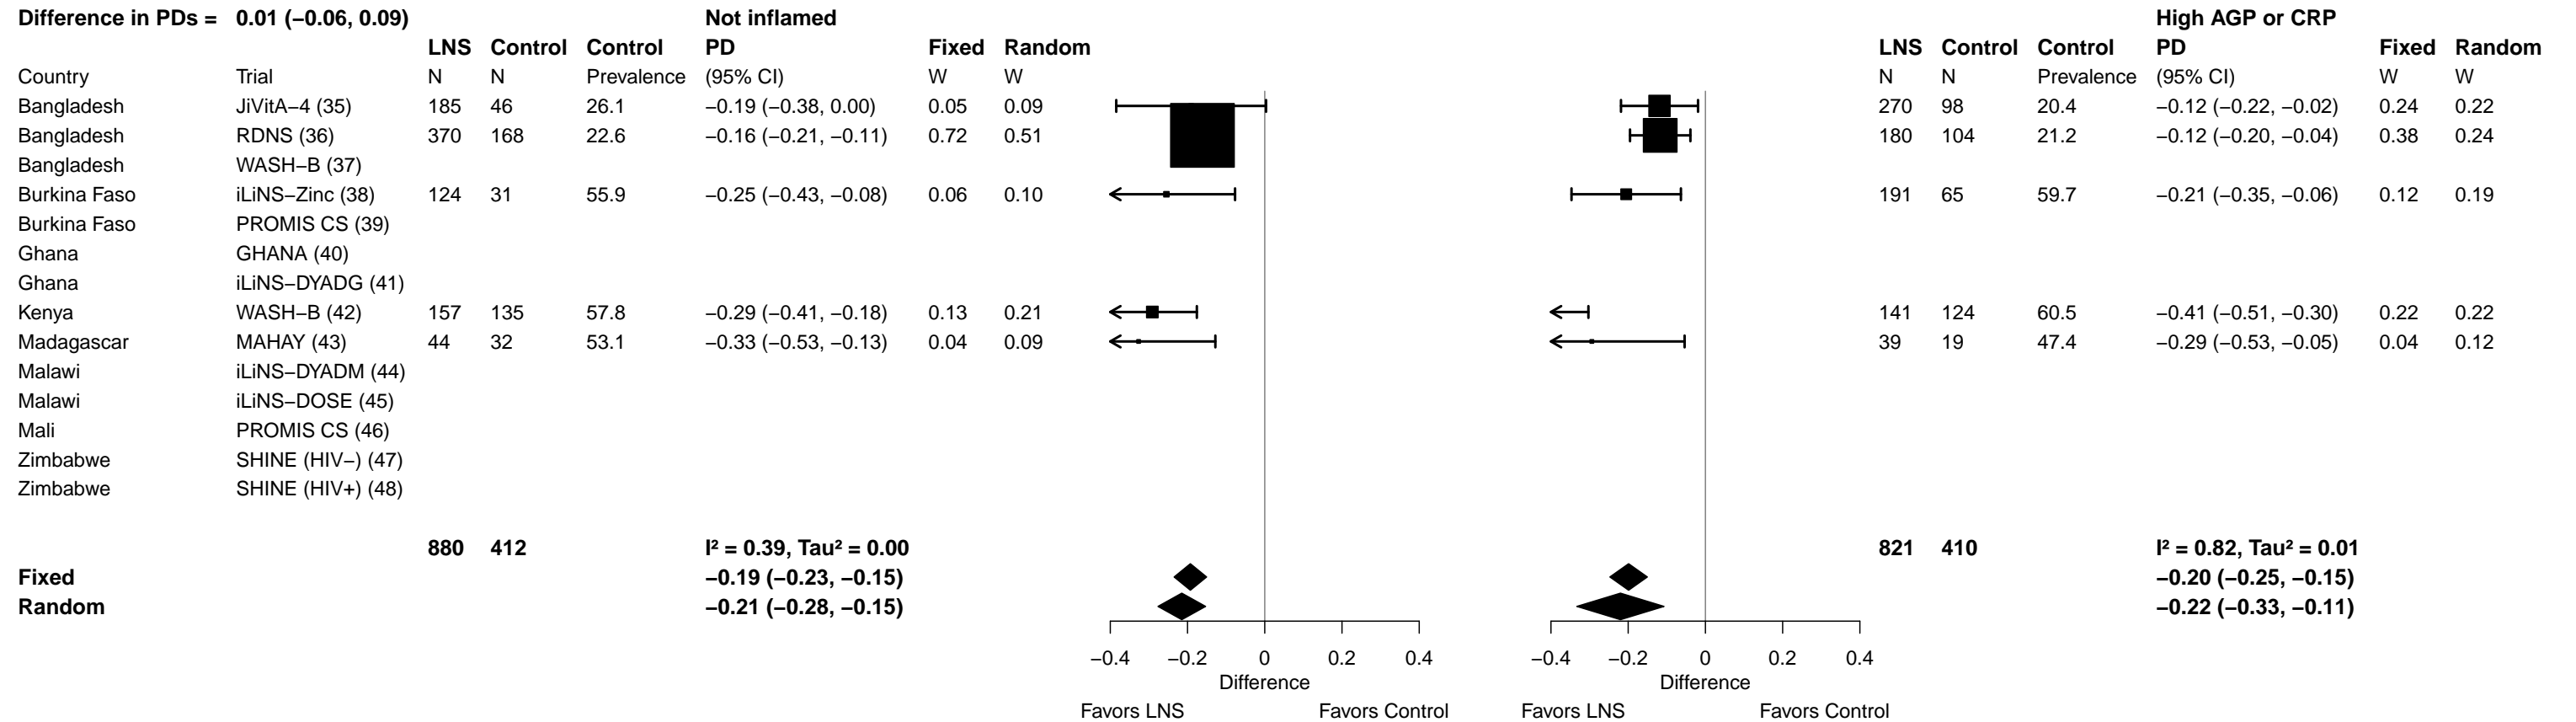

### Supplemental figure 6I: Iron deficiency anemia prevalence ratio

#### 6I1: Stratified by Maternal BMI

**P-for-interaction = 0.521**

**Ratio of PRs = 1.16 (0.74, 1.81)**

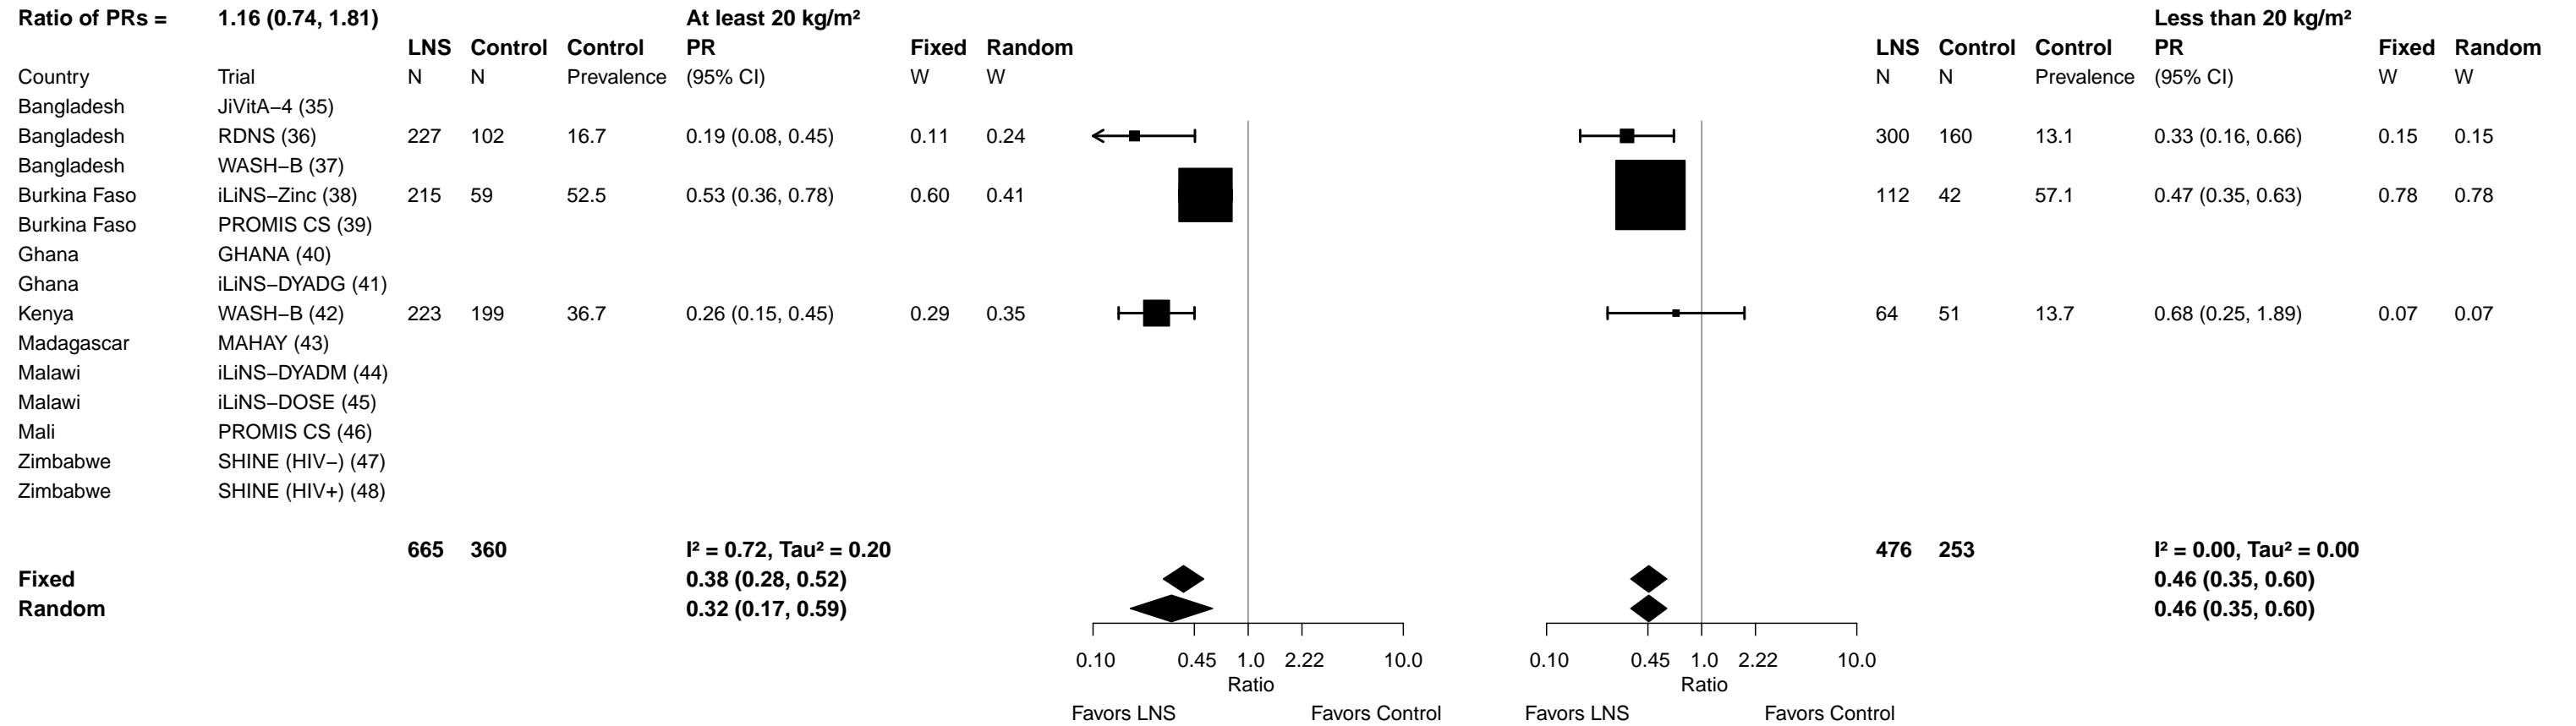

**Supplemental figure 6I: Iron deficiency anemia prevalence ratio**

**6I2: Stratified by Maternal age (insufficient comparisons)**

**Supplemental figure 6I: Iron deficiency anemia prevalence ratio**

**6I3: Stratified by Maternal education (insufficient comparisons)**



Supplemental figure 6I: Iron deficiency anemia prevalence ratio

6I4: Stratified by Child sex

**P-for-interaction = 0.208**  
**Ratio of PRs = 0.78 (0.53, 1.15)**

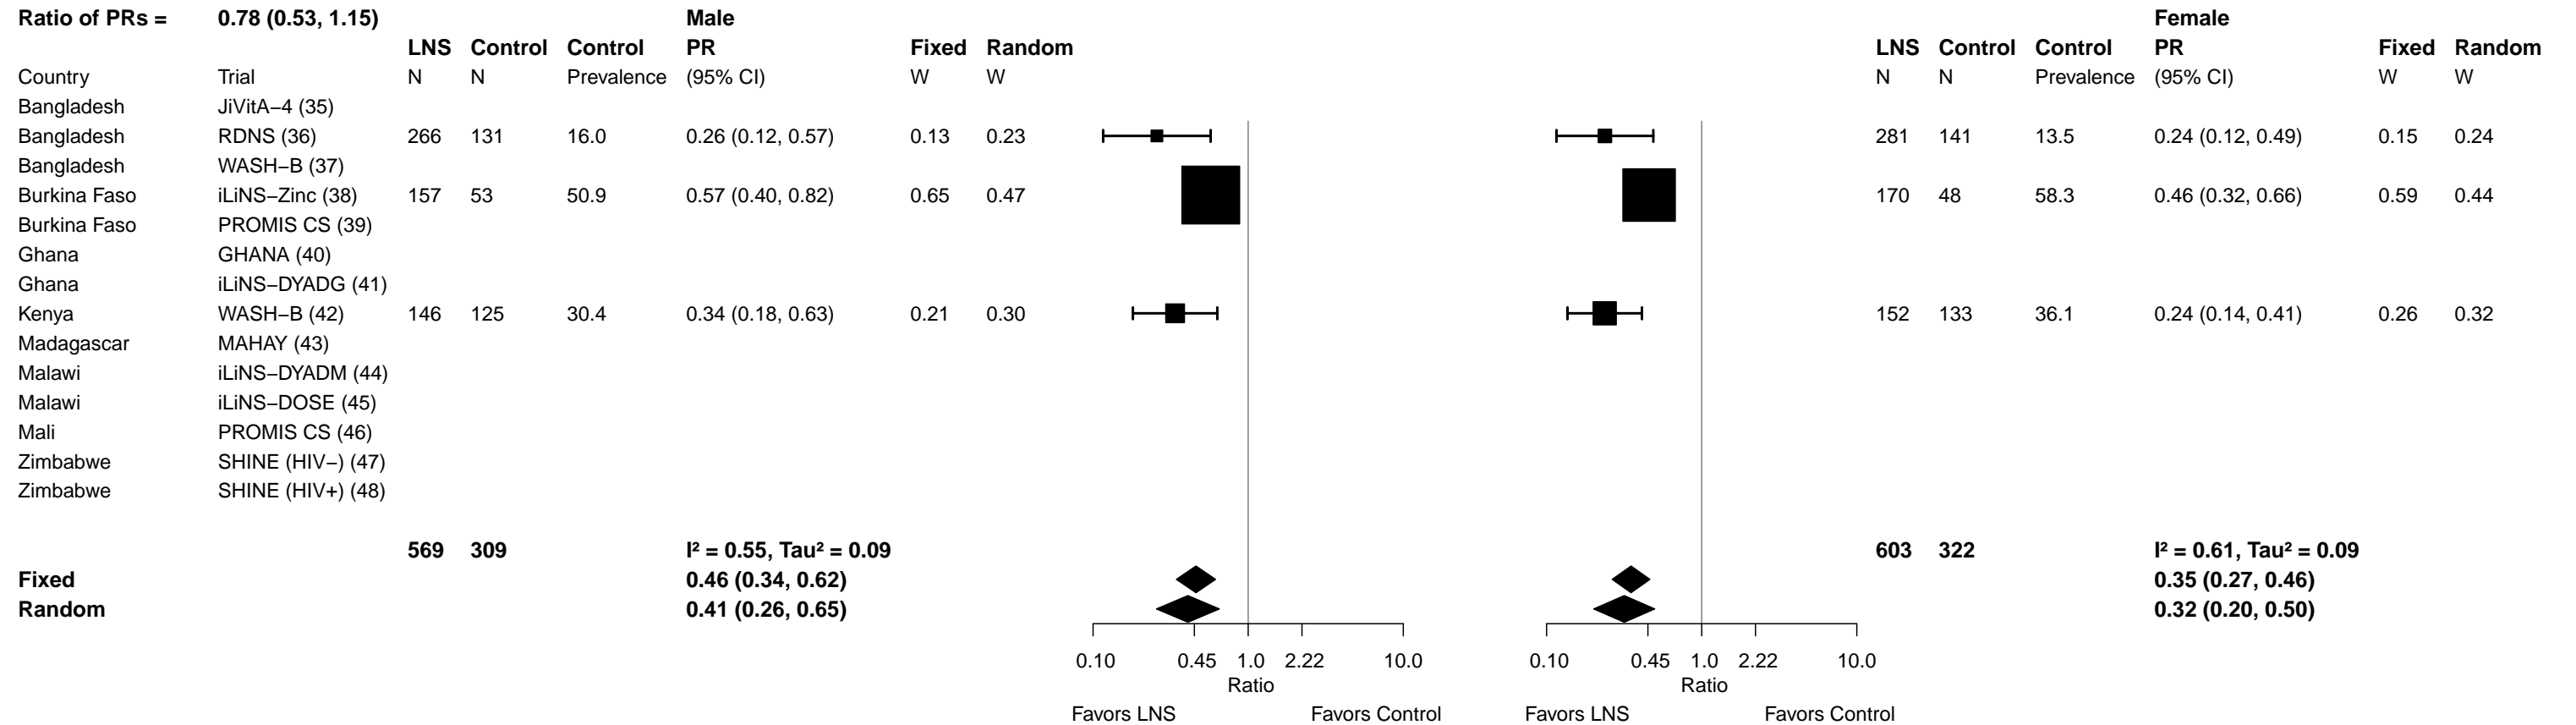

Supplemental figure 6I: Iron deficiency anemia prevalence ratio

6I5: Stratified by Child birth order

**P-for-interaction = 0.904**  
**Ratio of PRs = 0.97 (0.62, 1.53)**

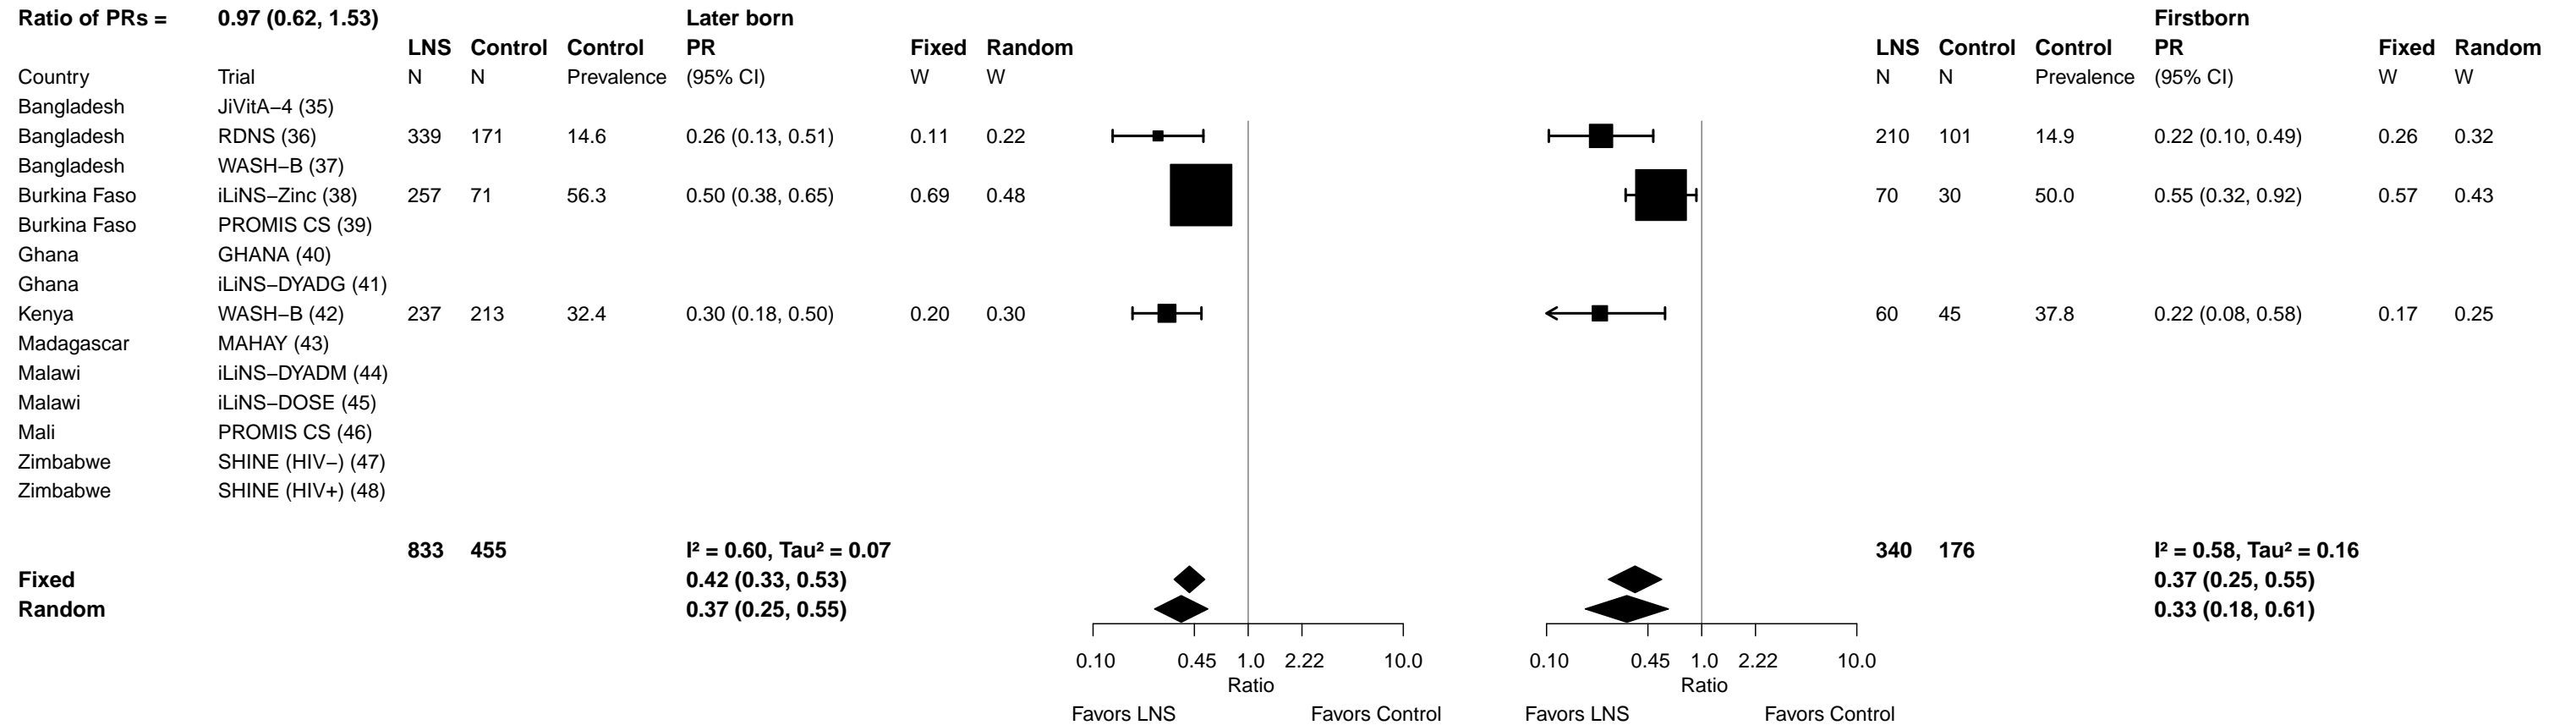

**Supplemental figure 6I: Iron deficiency anemia prevalence ratio**

**6I6: Stratified by Child baseline acute malnutrition (insufficient comparisons)**

**Supplemental figure 6I: Iron deficiency anemia prevalence ratio**

**6I7: Stratified by Child baseline anemia (insufficient comparisons)**

**Supplemental figure 6I: Iron deficiency anemia prevalence ratio**

**6I8: Stratified by Child high-dose vitamin A supplementation (insufficient comparisons)**

Supplemental figure 6I: Iron deficiency anemia prevalence ratio

6I9: Stratified by Child inflammation

**P-for-interaction = 0.388**  
**Ratio of PRs = 1.21 (0.79, 1.86)**

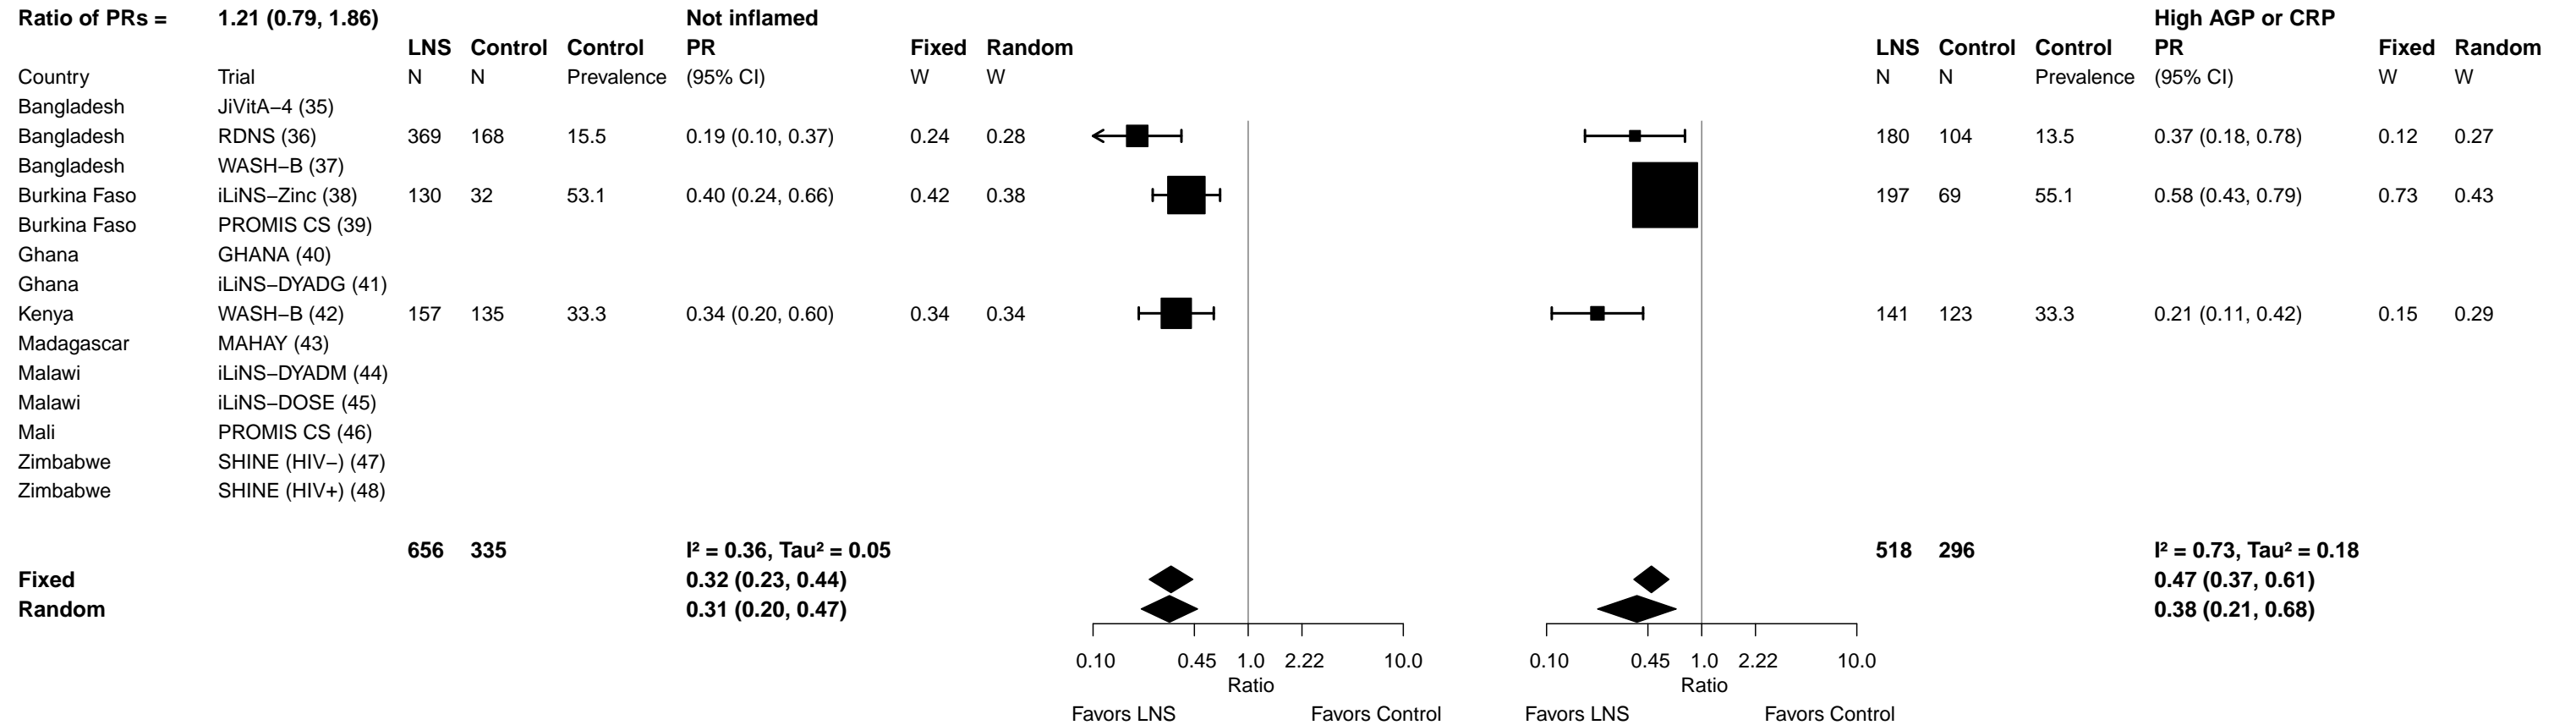

### Supplemental figure 6J: Iron deficiency anemia prevalence difference

#### 6J1: Stratified by Maternal BMI

**P-for-interaction = 0.023**  
**Difference in PDs = 0.09 (0.01, 0.16)**

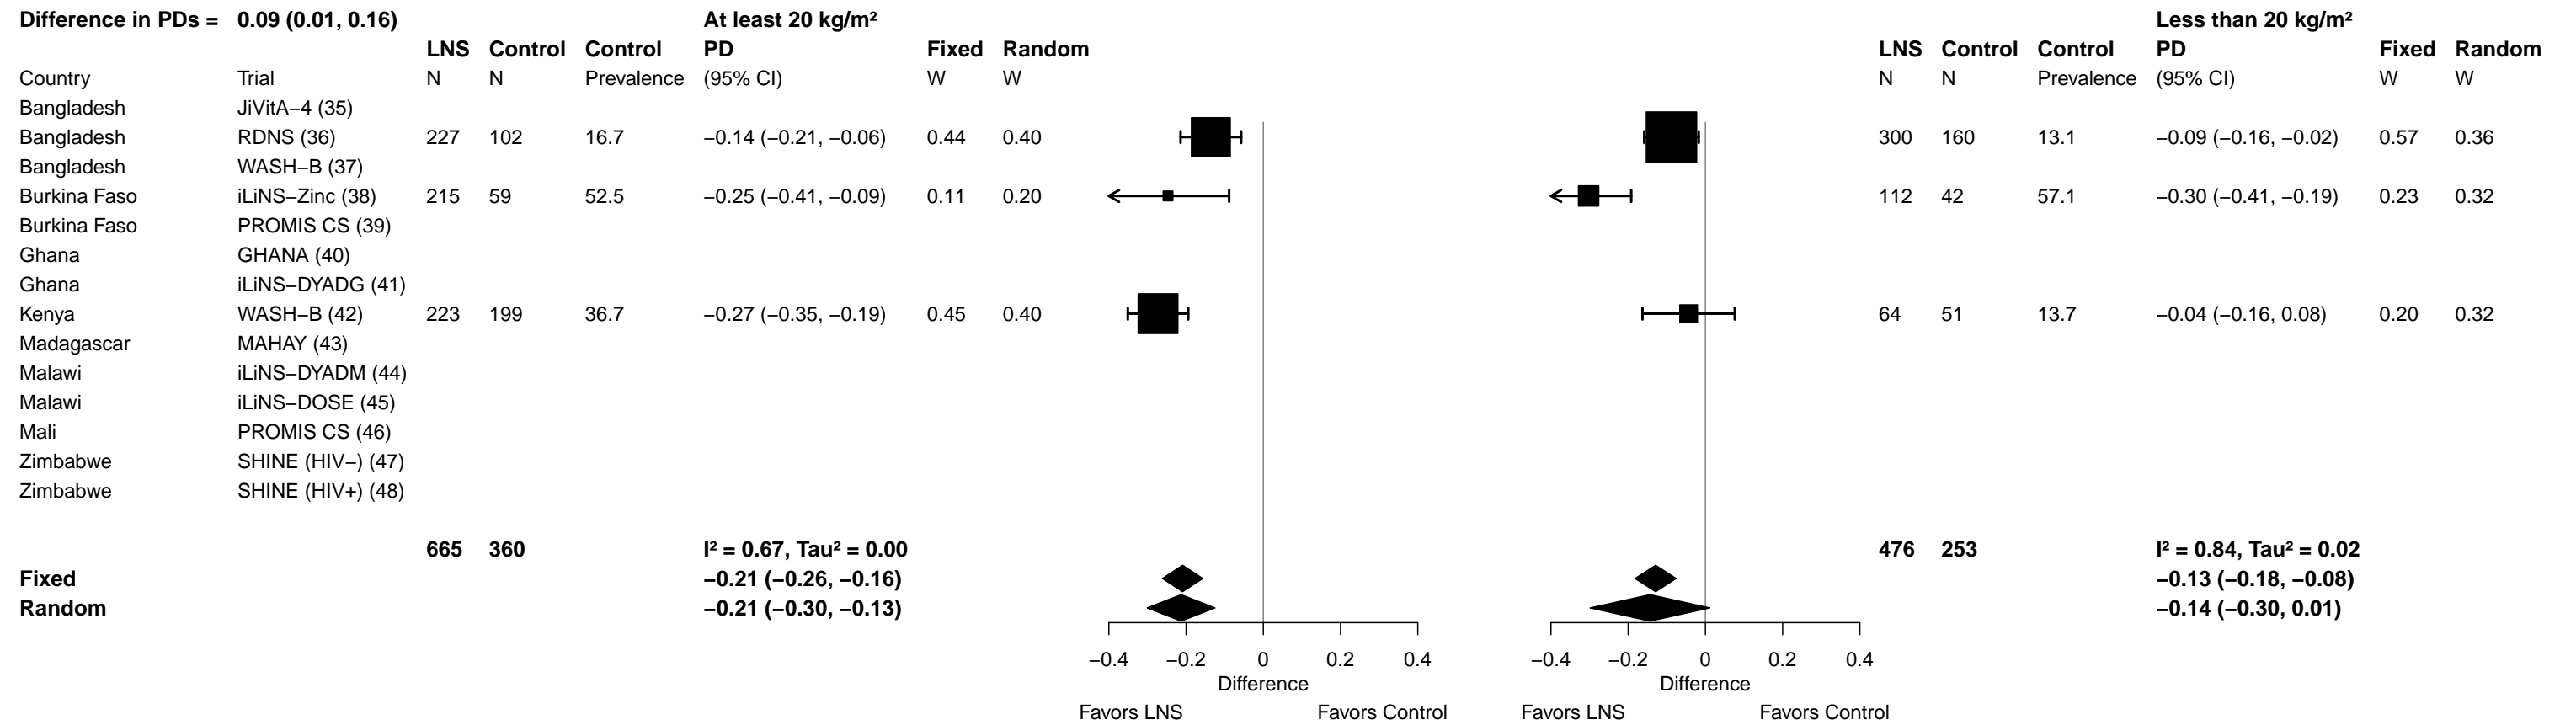

**Supplemental figure 6J: Iron deficiency anemia prevalence difference**

**6J2: Stratified by Maternal age (insufficient comparisons)**



**Supplemental figure 6J: Iron deficiency anemia prevalence difference**

**6J3: Stratified by Maternal education (insufficient comparisons)**

Supplemental figure 6J: Iron deficiency anemia prevalence difference

6J4: Stratified by Child sex

P-for-interaction = 0.555

Difference in PDs = -0.02 (-0.09, 0.05)

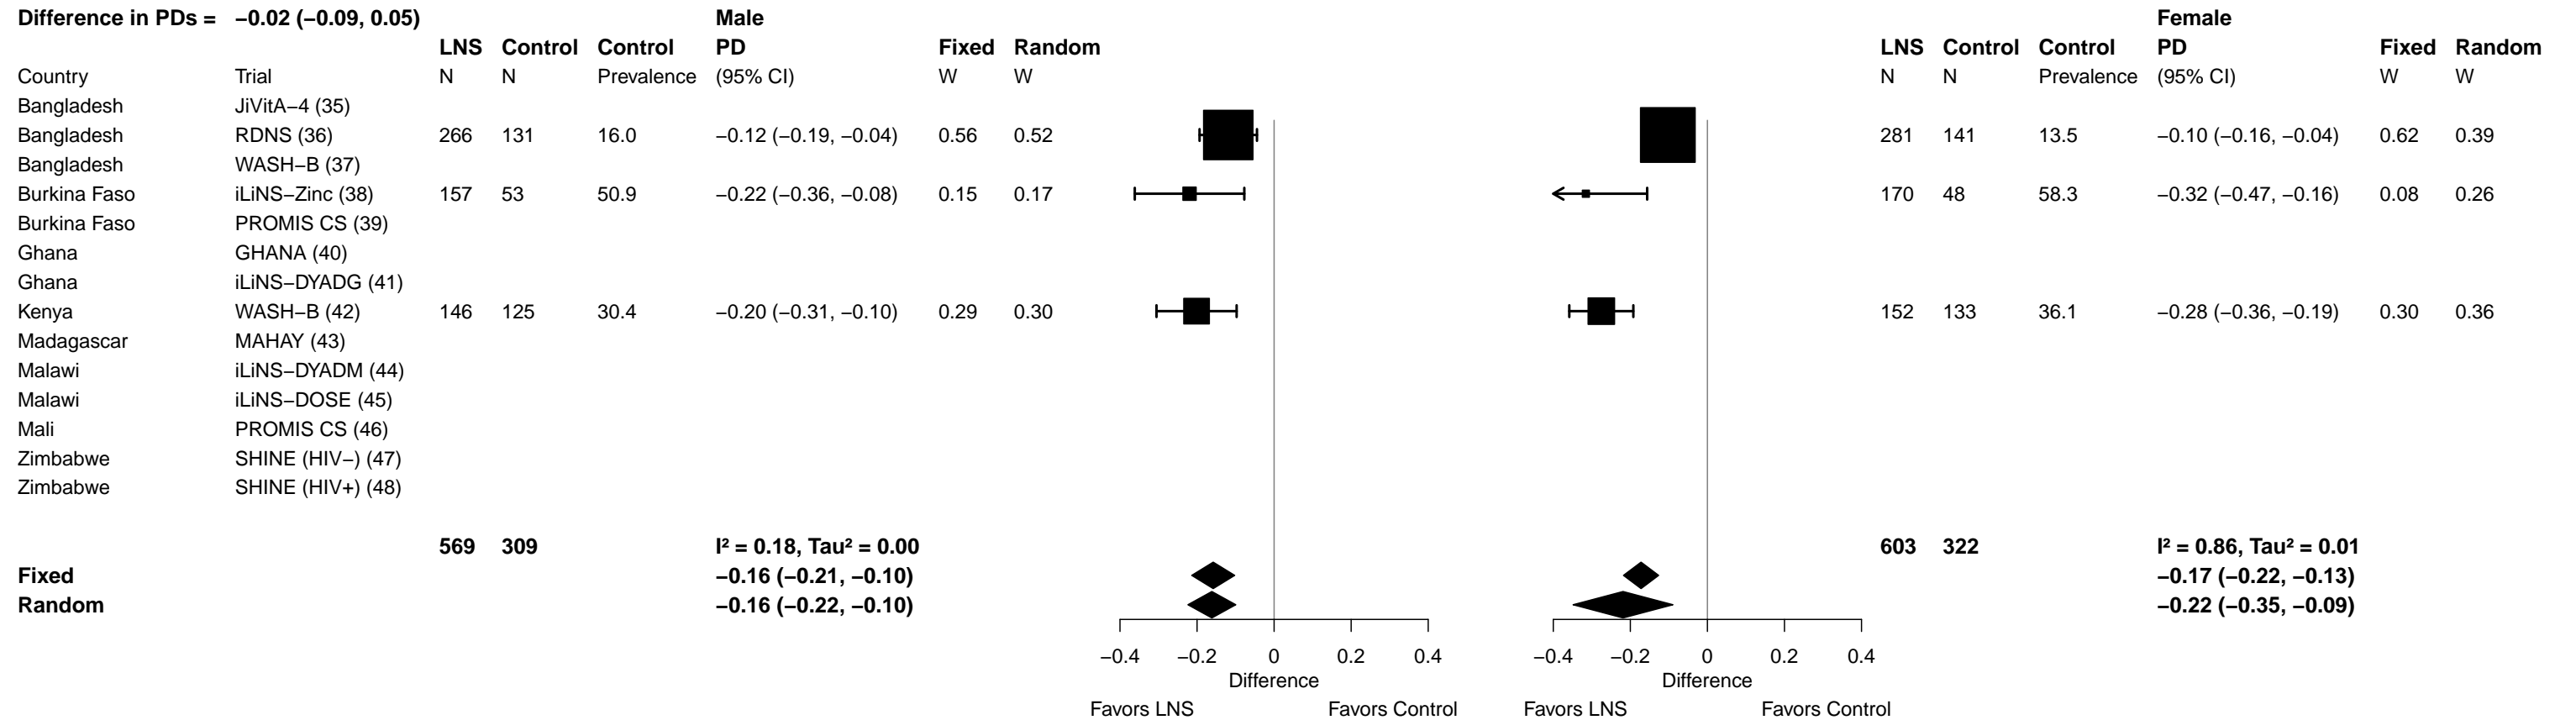

Supplemental figure 6J: Iron deficiency anemia prevalence difference

6J5: Stratified by Child birth order

P-for-interaction = 0.745

Difference in PDs = -0.01 (-0.09, 0.06)

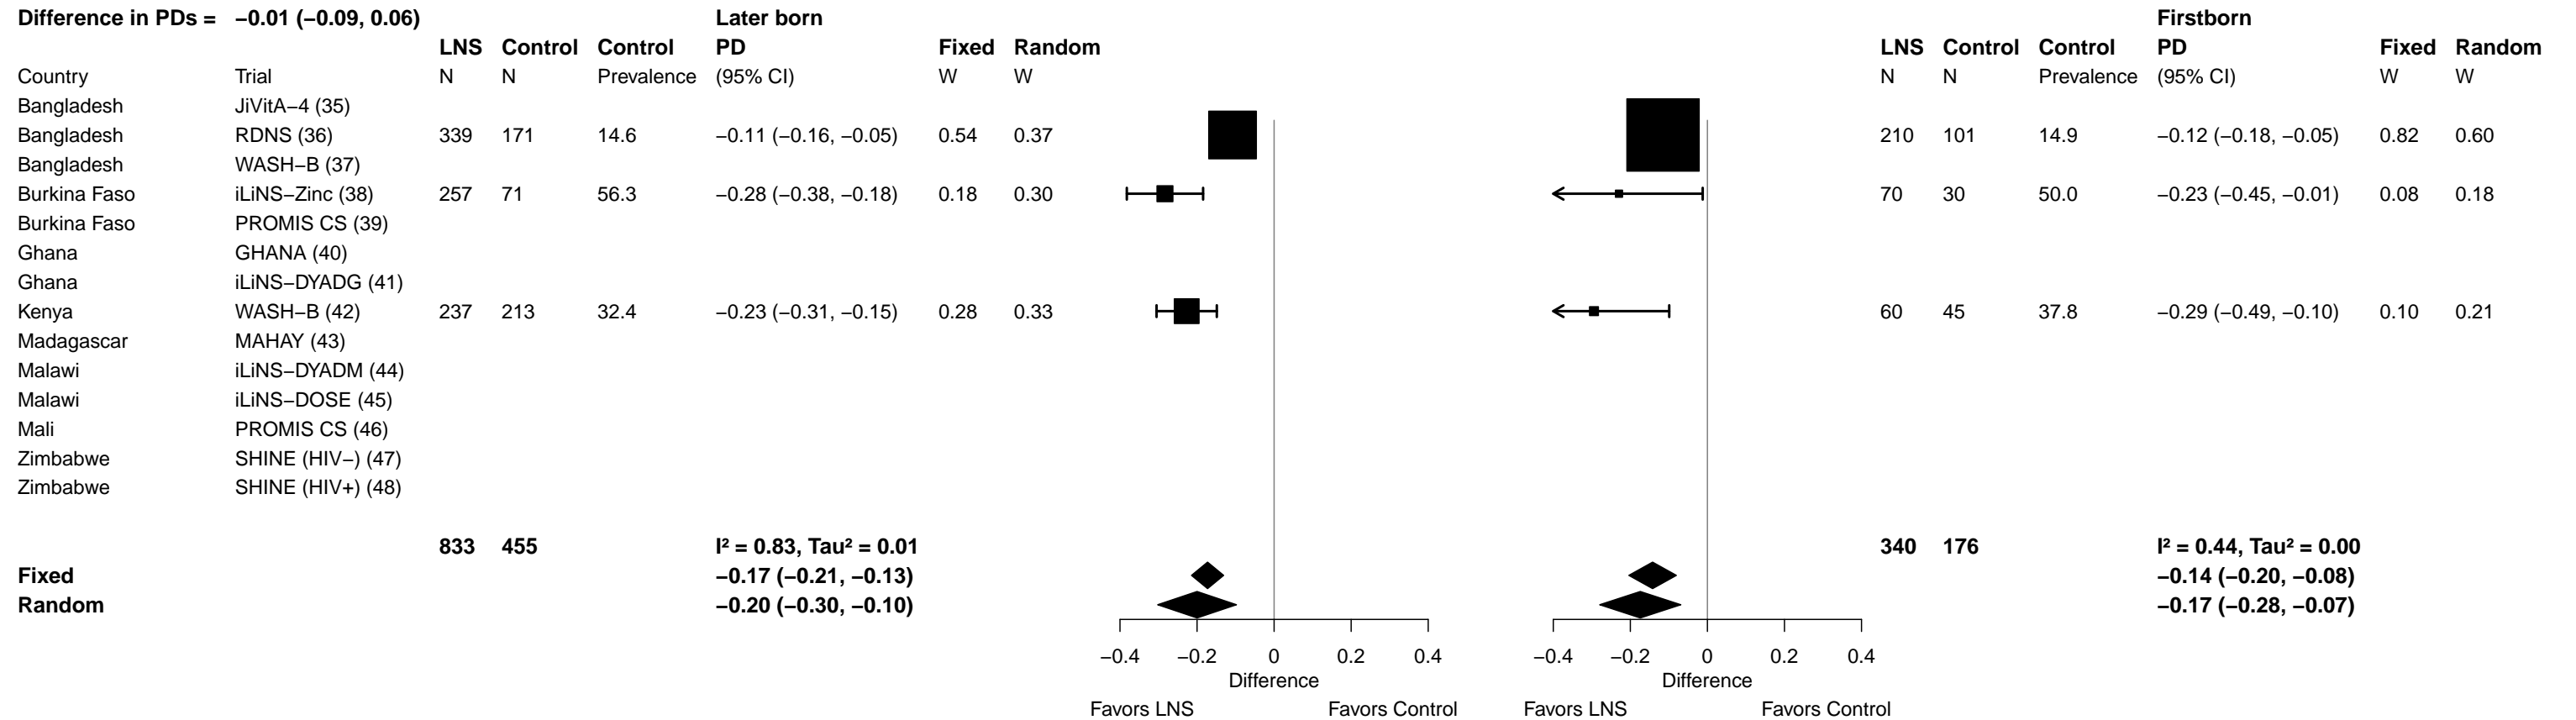

**Supplemental figure 6J: Iron deficiency anemia prevalence difference**

**6J6: Stratified by Child baseline acute malnutrition (insufficient comparisons)**

**Supplemental figure 6J: Iron deficiency anemia prevalence difference**

**6J7: Stratified by Child baseline anemia (insufficient comparisons)**

**Supplemental figure 6J: Iron deficiency anemia prevalence difference**

**6J8: Stratified by Child high-dose vitamin A supplementation (insufficient comparisons)**

Supplemental figure 6J: Iron deficiency anemia prevalence difference

6J9: Stratified by Child inflammation

P-for-interaction = 0.590

Difference in PDs = 0.02 (-0.05, 0.09)

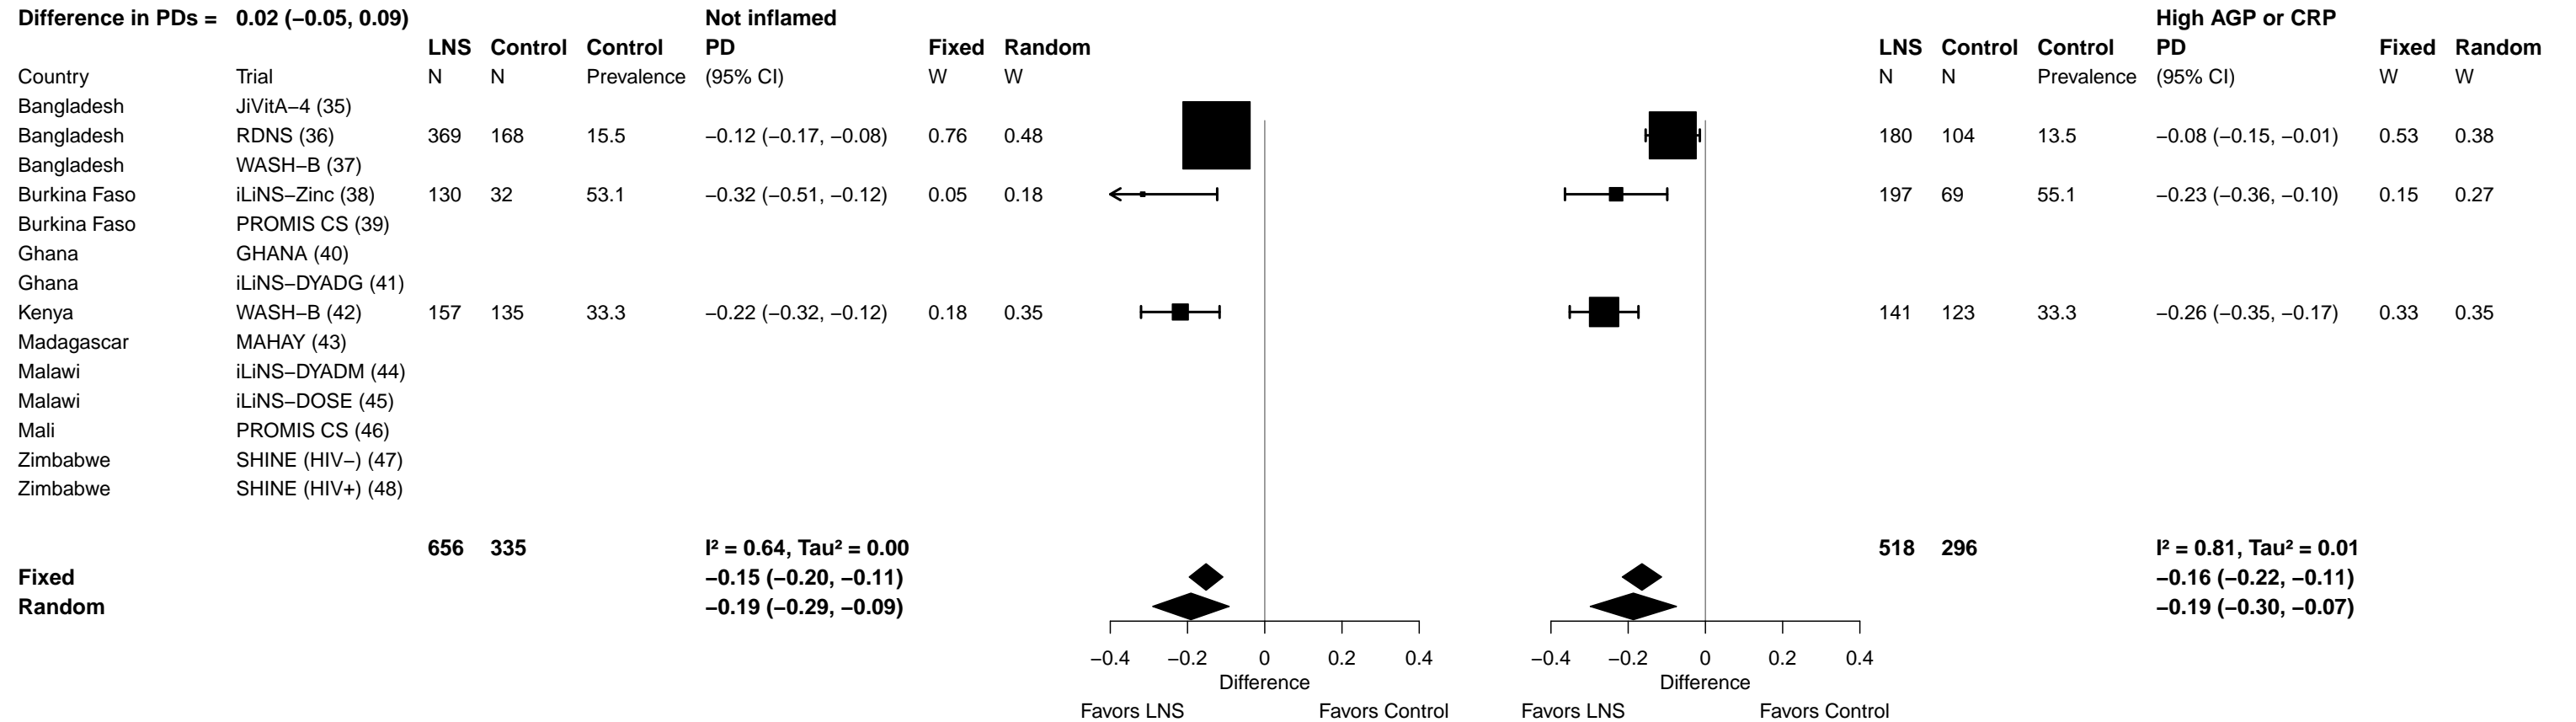

### Supplemental figure 6K: Geometric mean ratio of soluble transferrin receptor concentration

#### 6K1: Stratified by Maternal BMI

**P-for-interaction = 0.955**  
**Ratio of GMRs = 1.00 (0.94, 1.06)**

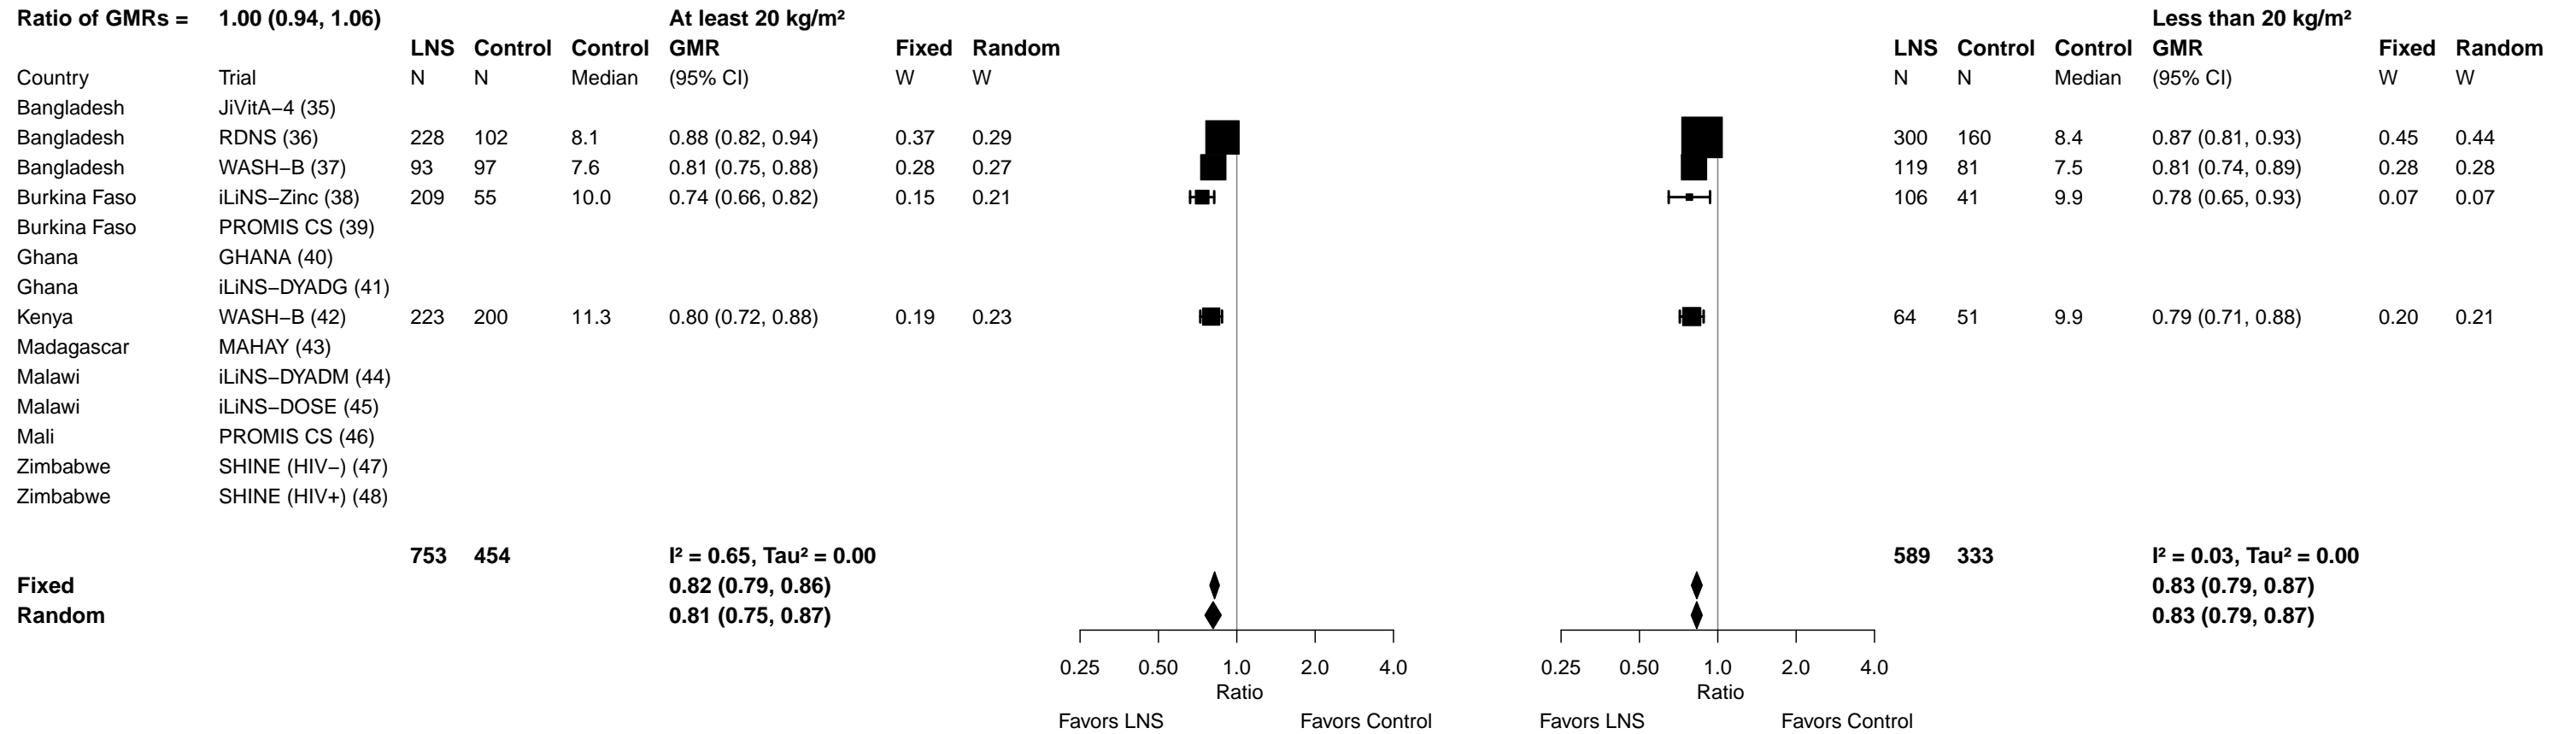



Supplemental figure 6K: Geometric mean ratio of soluble transferrin receptor concentration

6K2: Stratified by Maternal age

**P-for-interaction = 0.213**  
**Ratio of GMRs = 0.96 (0.91, 1.02)**

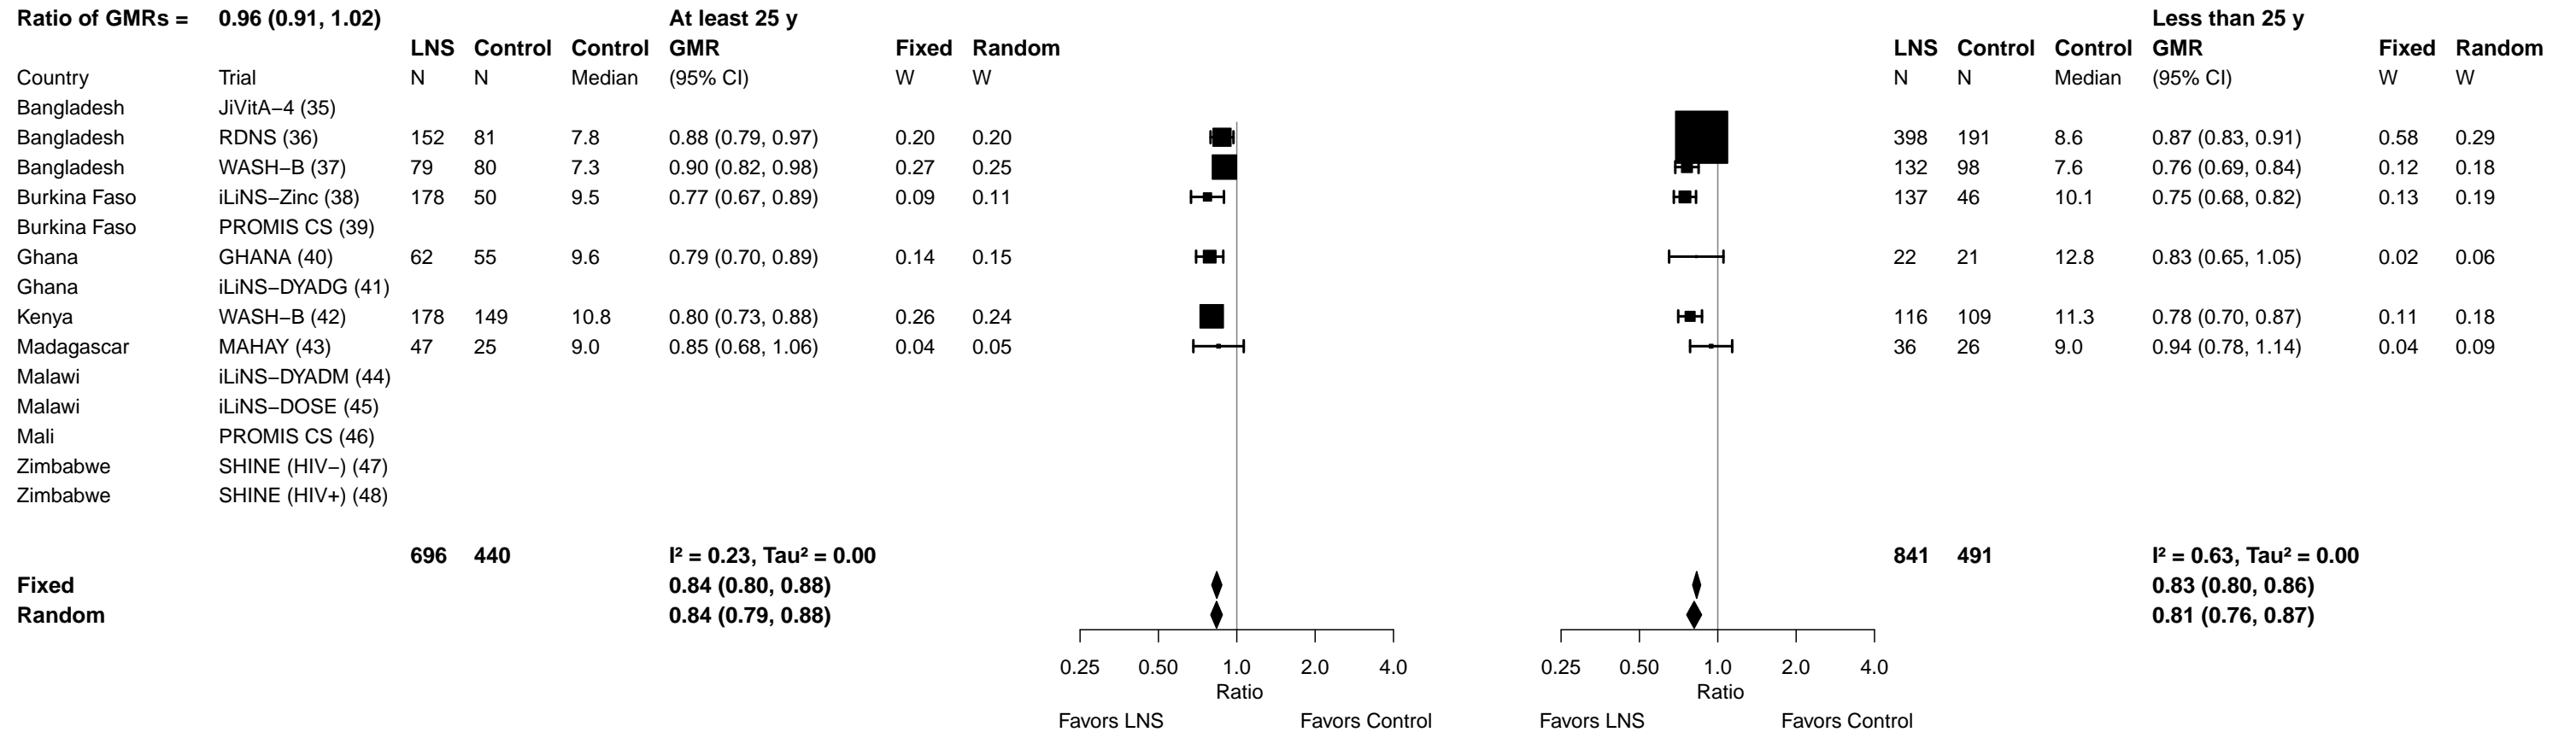

Supplemental figure 6K: Geometric mean ratio of soluble transferrin receptor concentration

6K3: Stratified by Maternal education

**P-for-interaction = 0.576**  
**Ratio of GMRs = 0.98 (0.92, 1.05)**

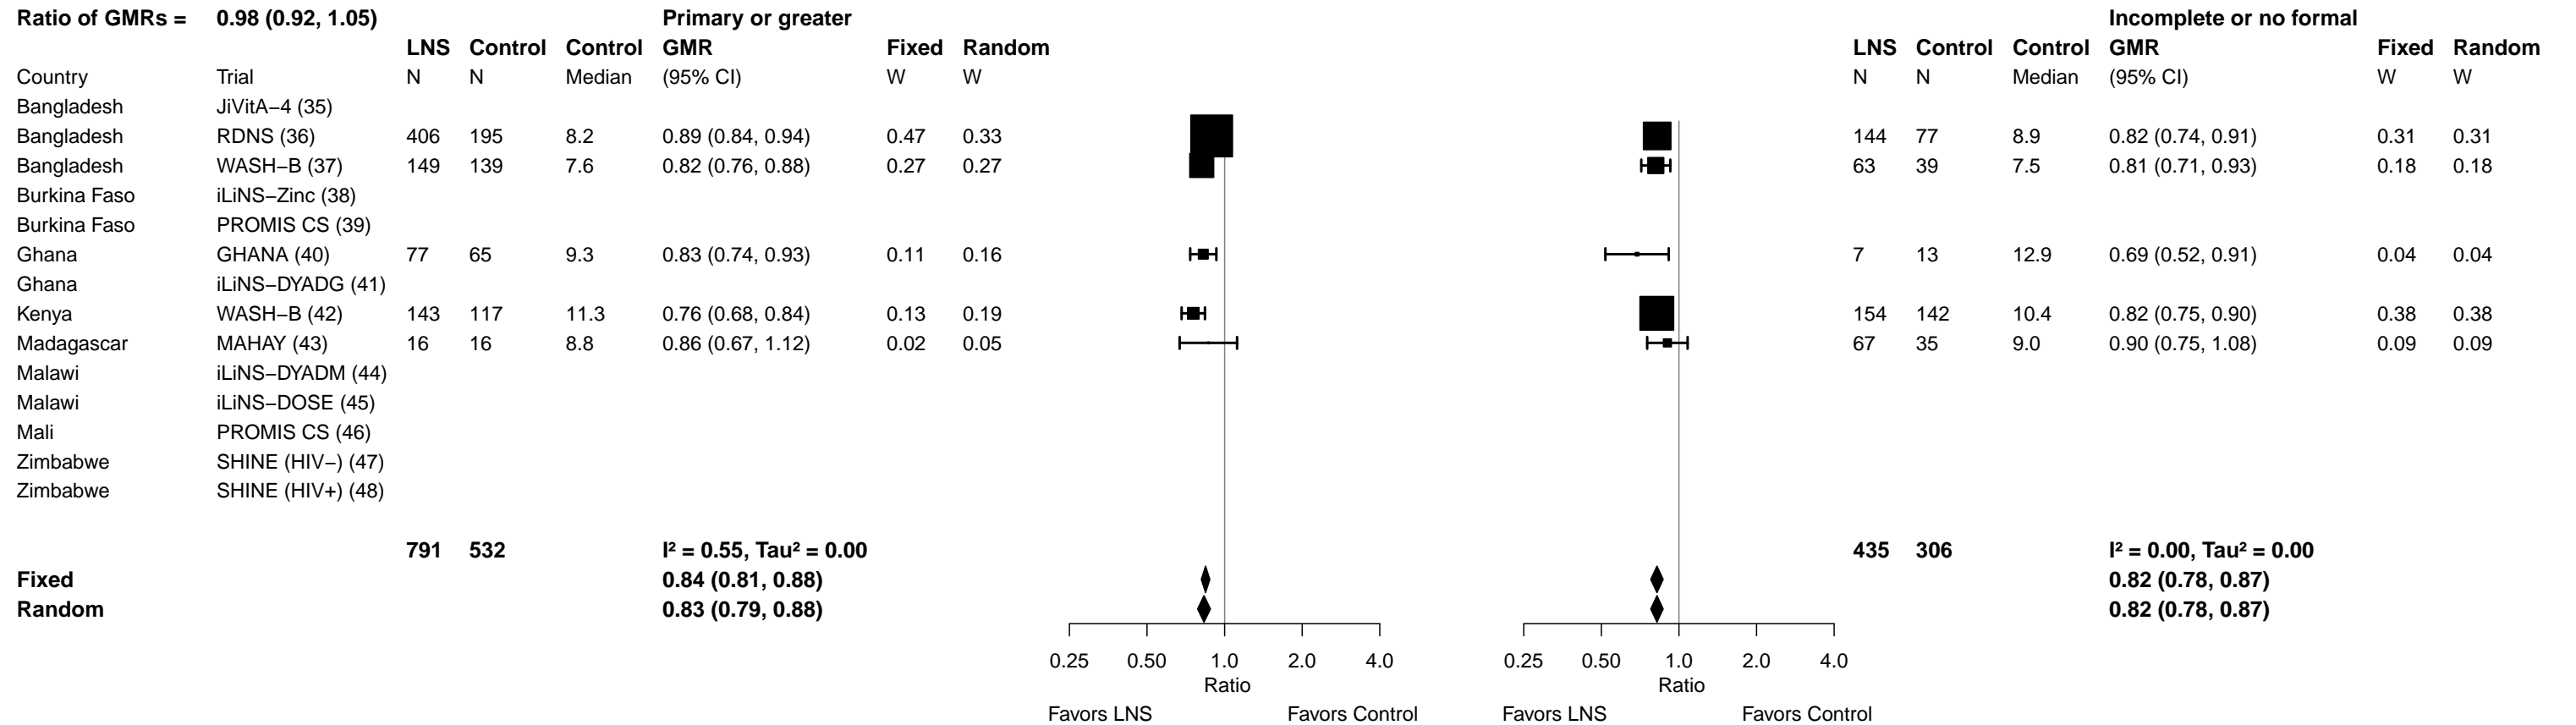

Supplemental figure 6K: Geometric mean ratio of soluble transferrin receptor concentration

6K4: Stratified by Child sex

**P-for-interaction = 0.268**  
**Ratio of GMRs = 1.03 (0.98, 1.09)**

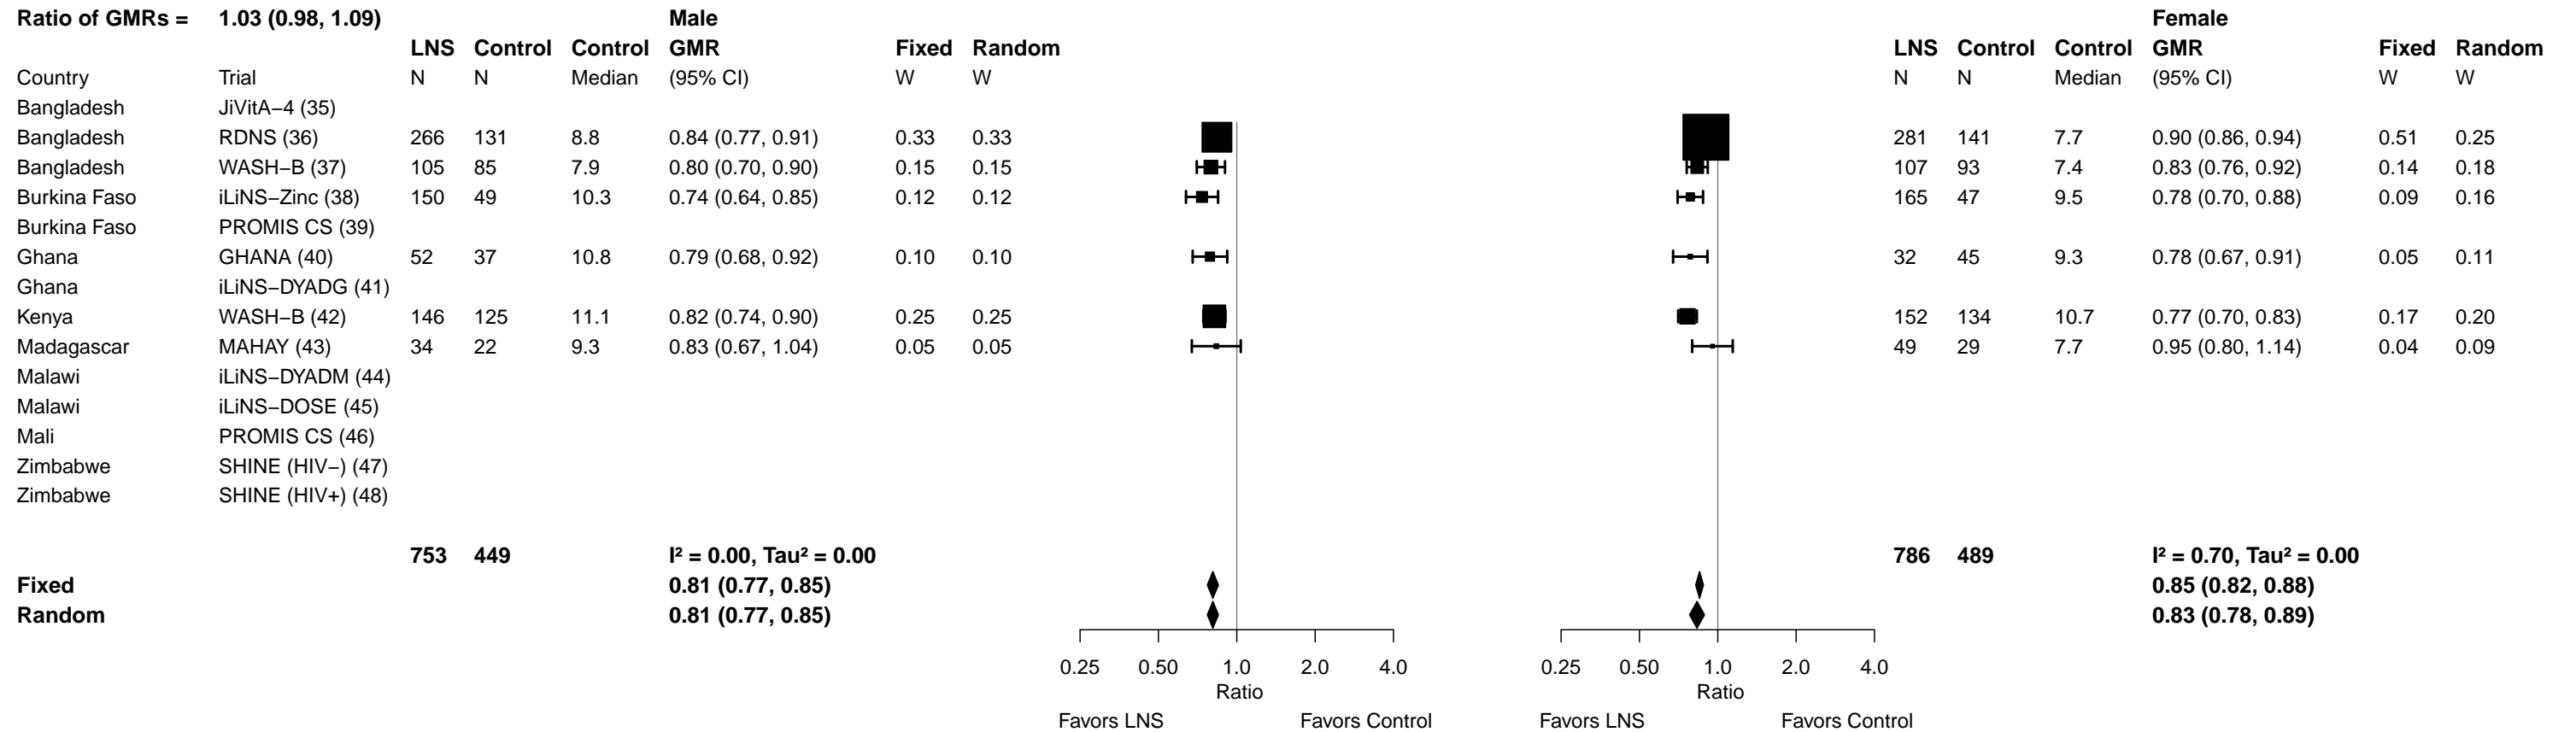

Supplemental figure 6K: Geometric mean ratio of soluble transferrin receptor concentration

6K5: Stratified by Child birth order

**P-for-interaction = 0.731**  
**Ratio of GMRs = 0.99 (0.93, 1.05)**

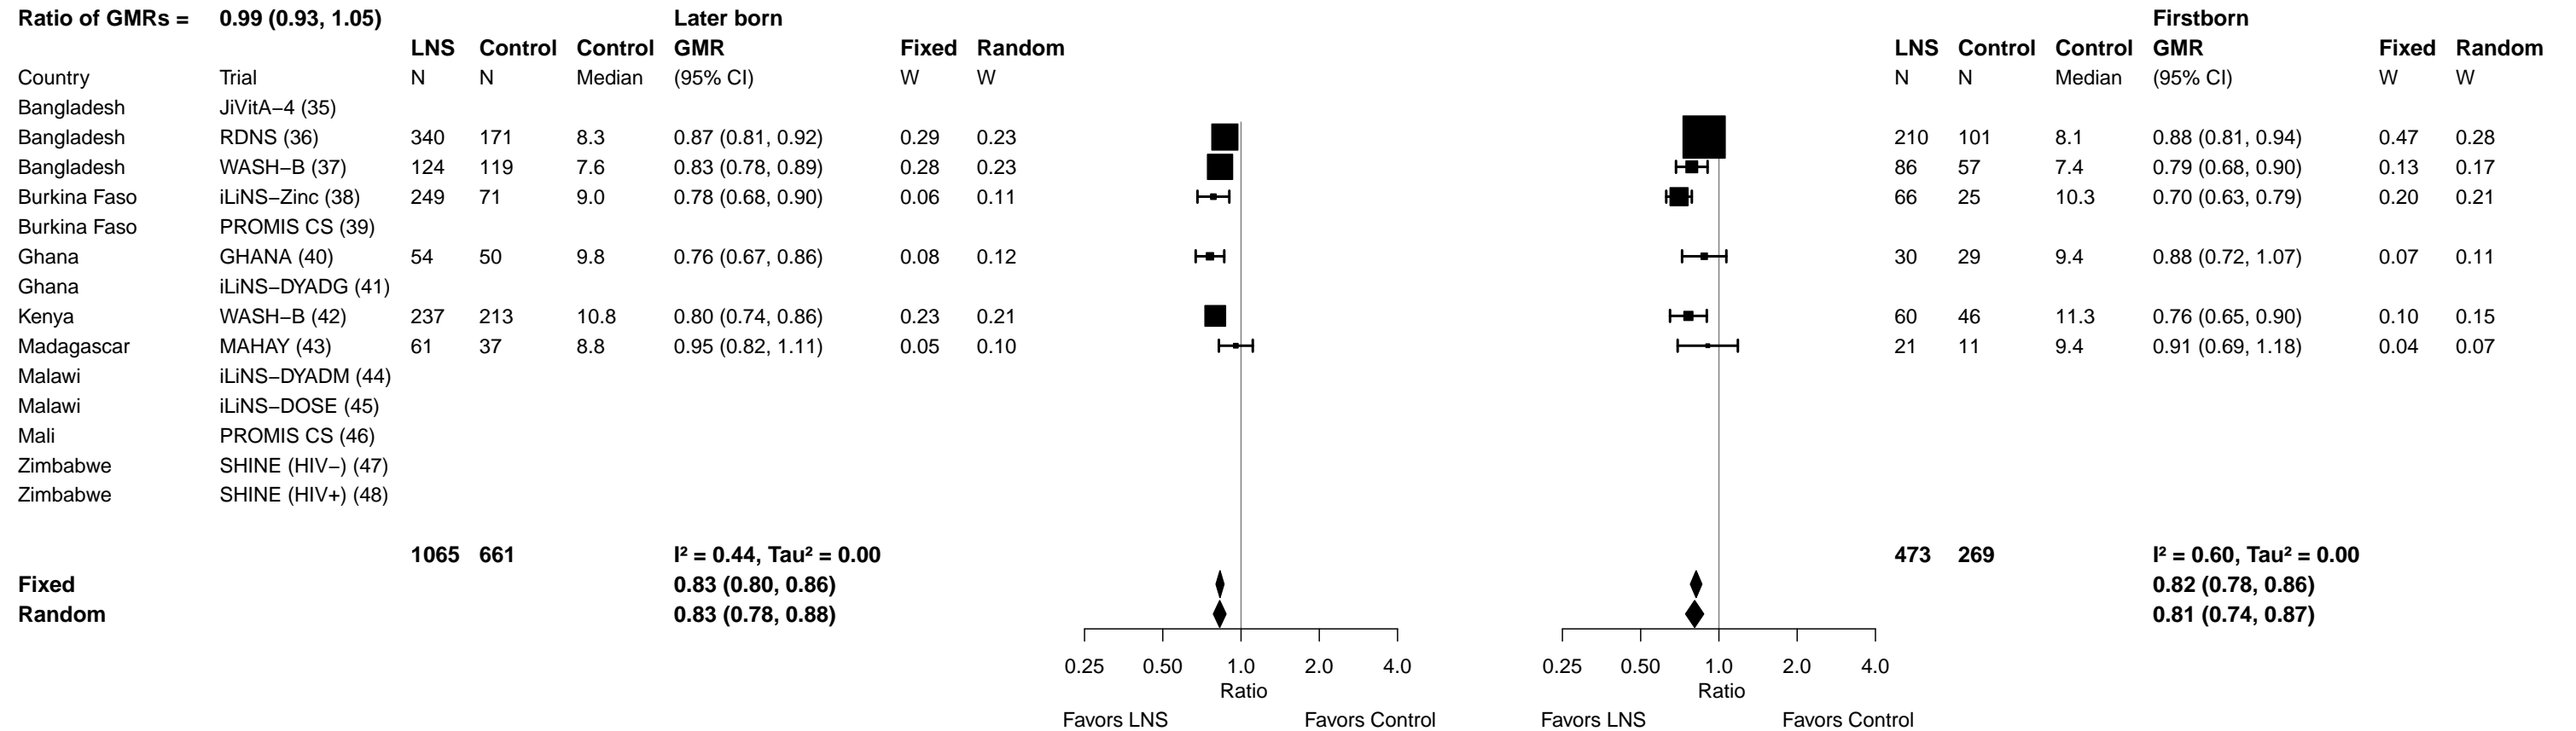

**Supplemental figure 6K: Geometric mean ratio of soluble transferrin receptor concentration**

**6K6: Stratified by Child baseline acute malnutrition (insufficient comparisons)**

**Supplemental figure 6K: Geometric mean ratio of soluble transferrin receptor concentration**

**6K7: Stratified by Child baseline anemia (insufficient comparisons)**

Supplemental figure 6K: Geometric mean ratio of soluble transferrin receptor concentration

6K8: Stratified by Child high-dose vitamin A supplementation

**P-for-interaction = 0.373**  
**Ratio of GMRs = 1.04 (0.96, 1.12)**

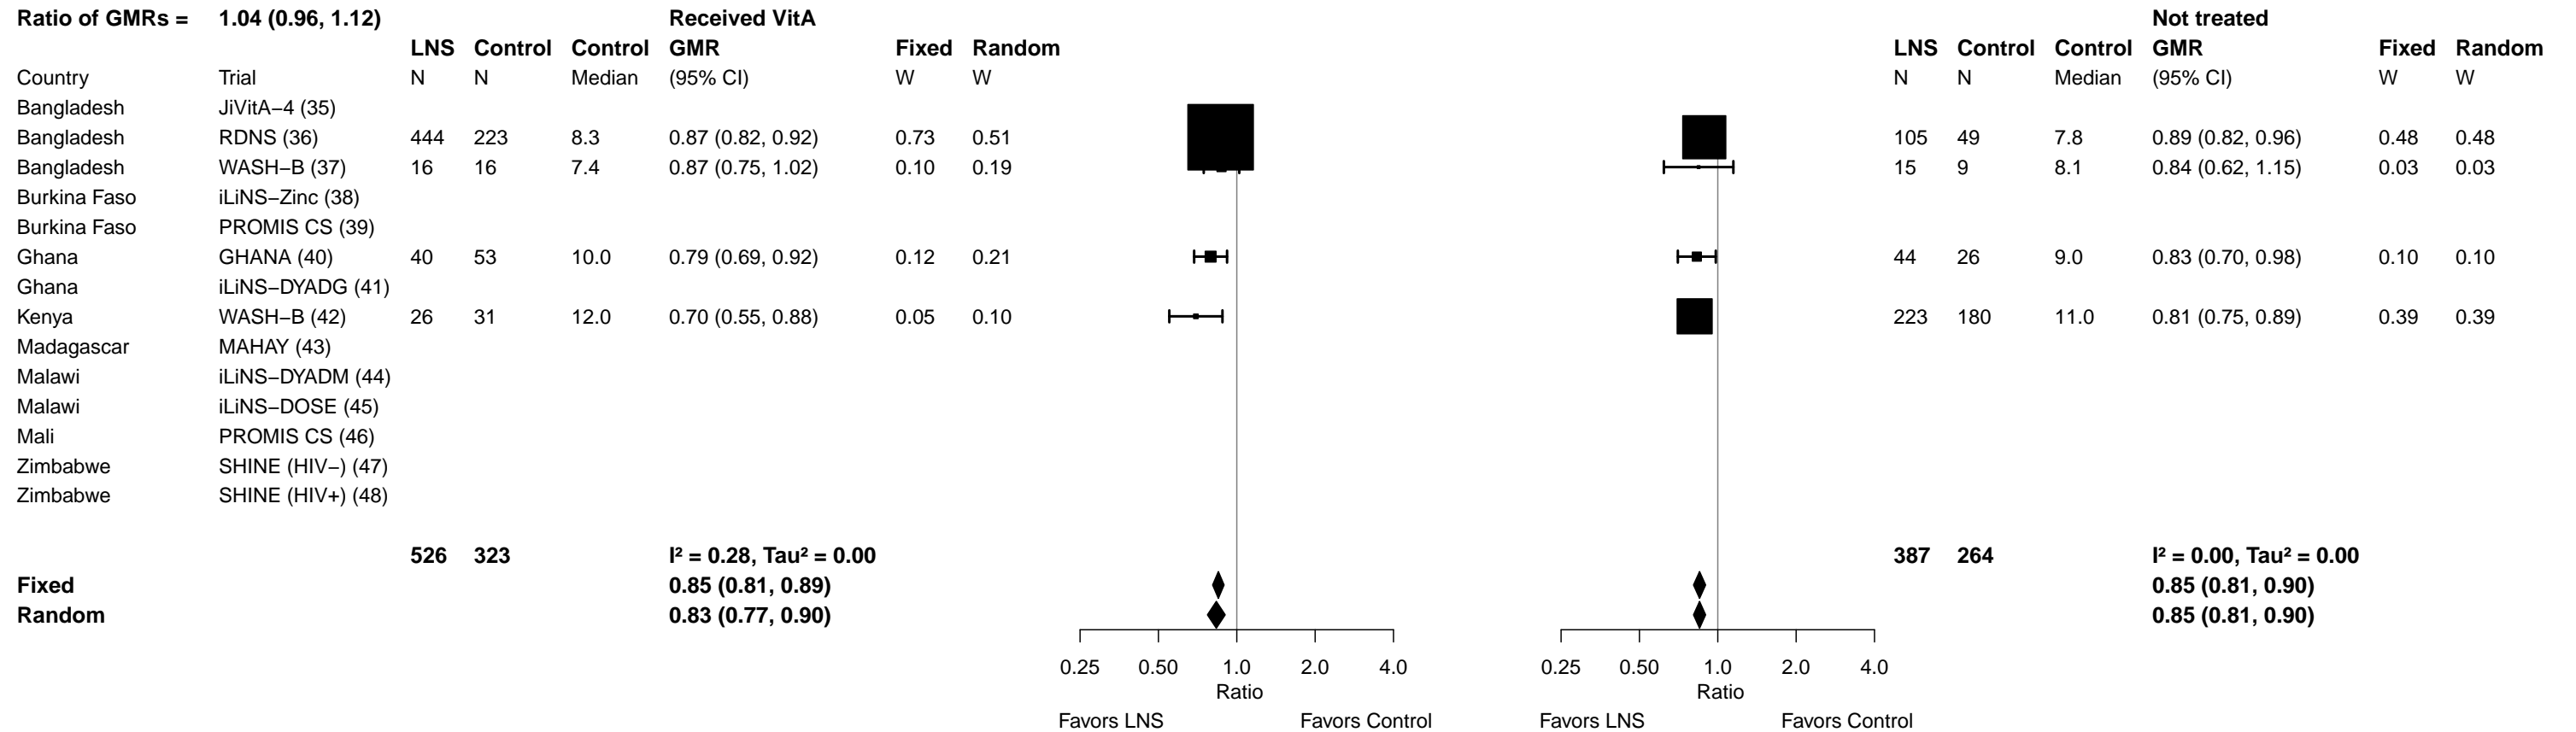

Supplemental figure 6K: Geometric mean ratio of soluble transferrin receptor concentration

6K9: Stratified by Child inflammation

**P-for-interaction = 0.478**  
**Ratio of GMRs = 0.98 (0.93, 1.03)**

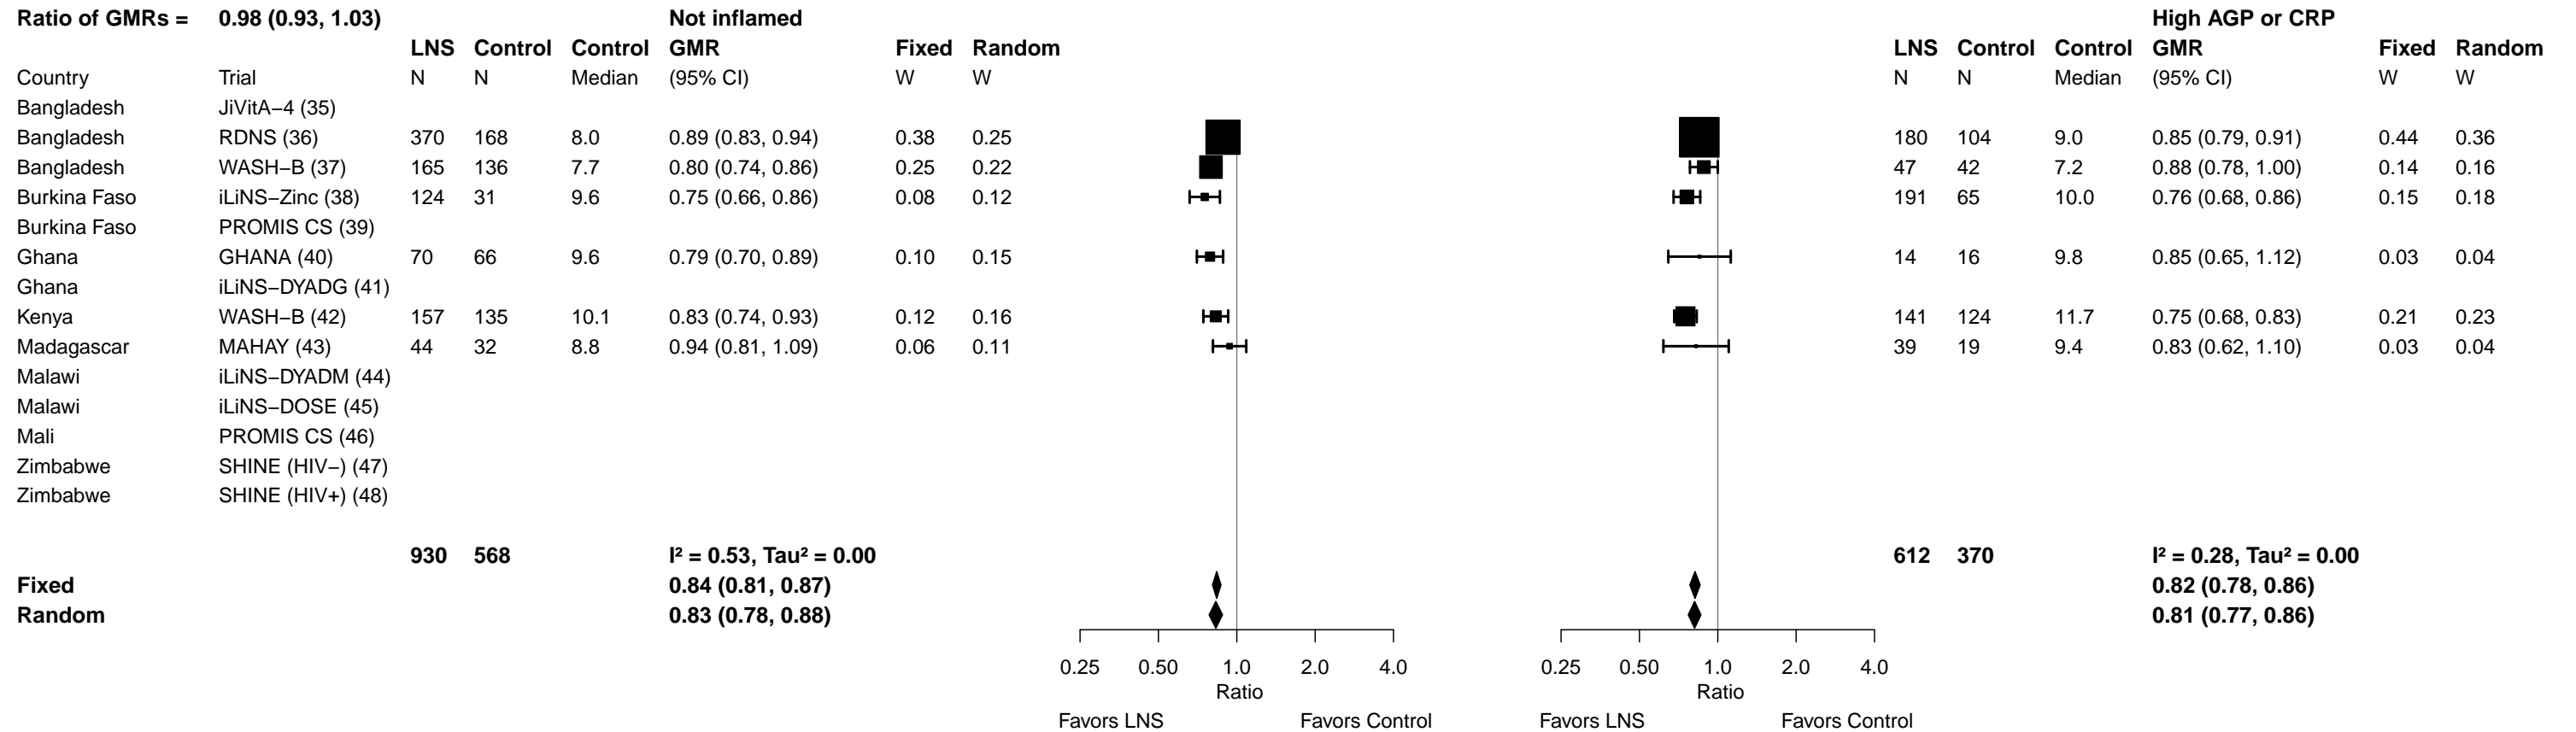



### Supplemental figure 6L: Elevated soluble transferrin receptor prevalence ratio

#### 6L1: Stratified by Maternal BMI

**P-for-interaction = 0.126**

**Ratio of PRs = 0.85 (0.69, 1.05)**

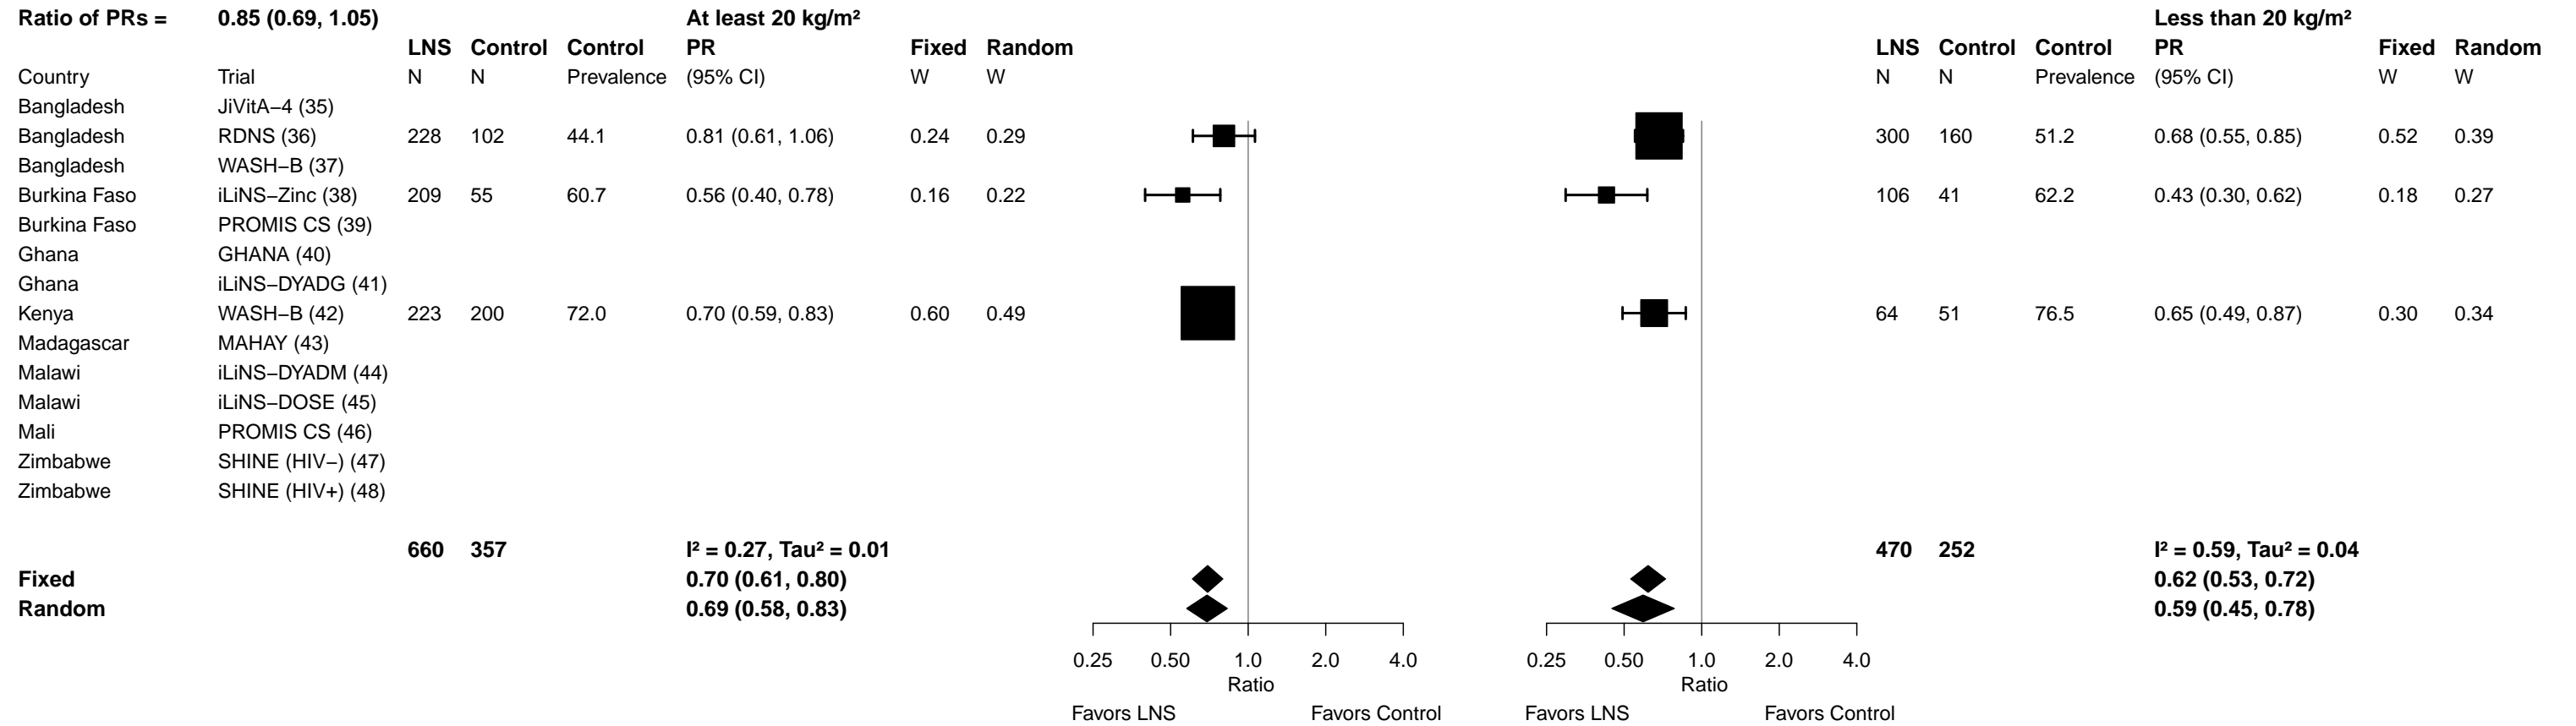

Supplemental figure 6L: Elevated soluble transferrin receptor prevalence ratio

6L2: Stratified by Maternal age

P-for-interaction = 0.585

Ratio of PRs = 0.96 (0.81, 1.13)

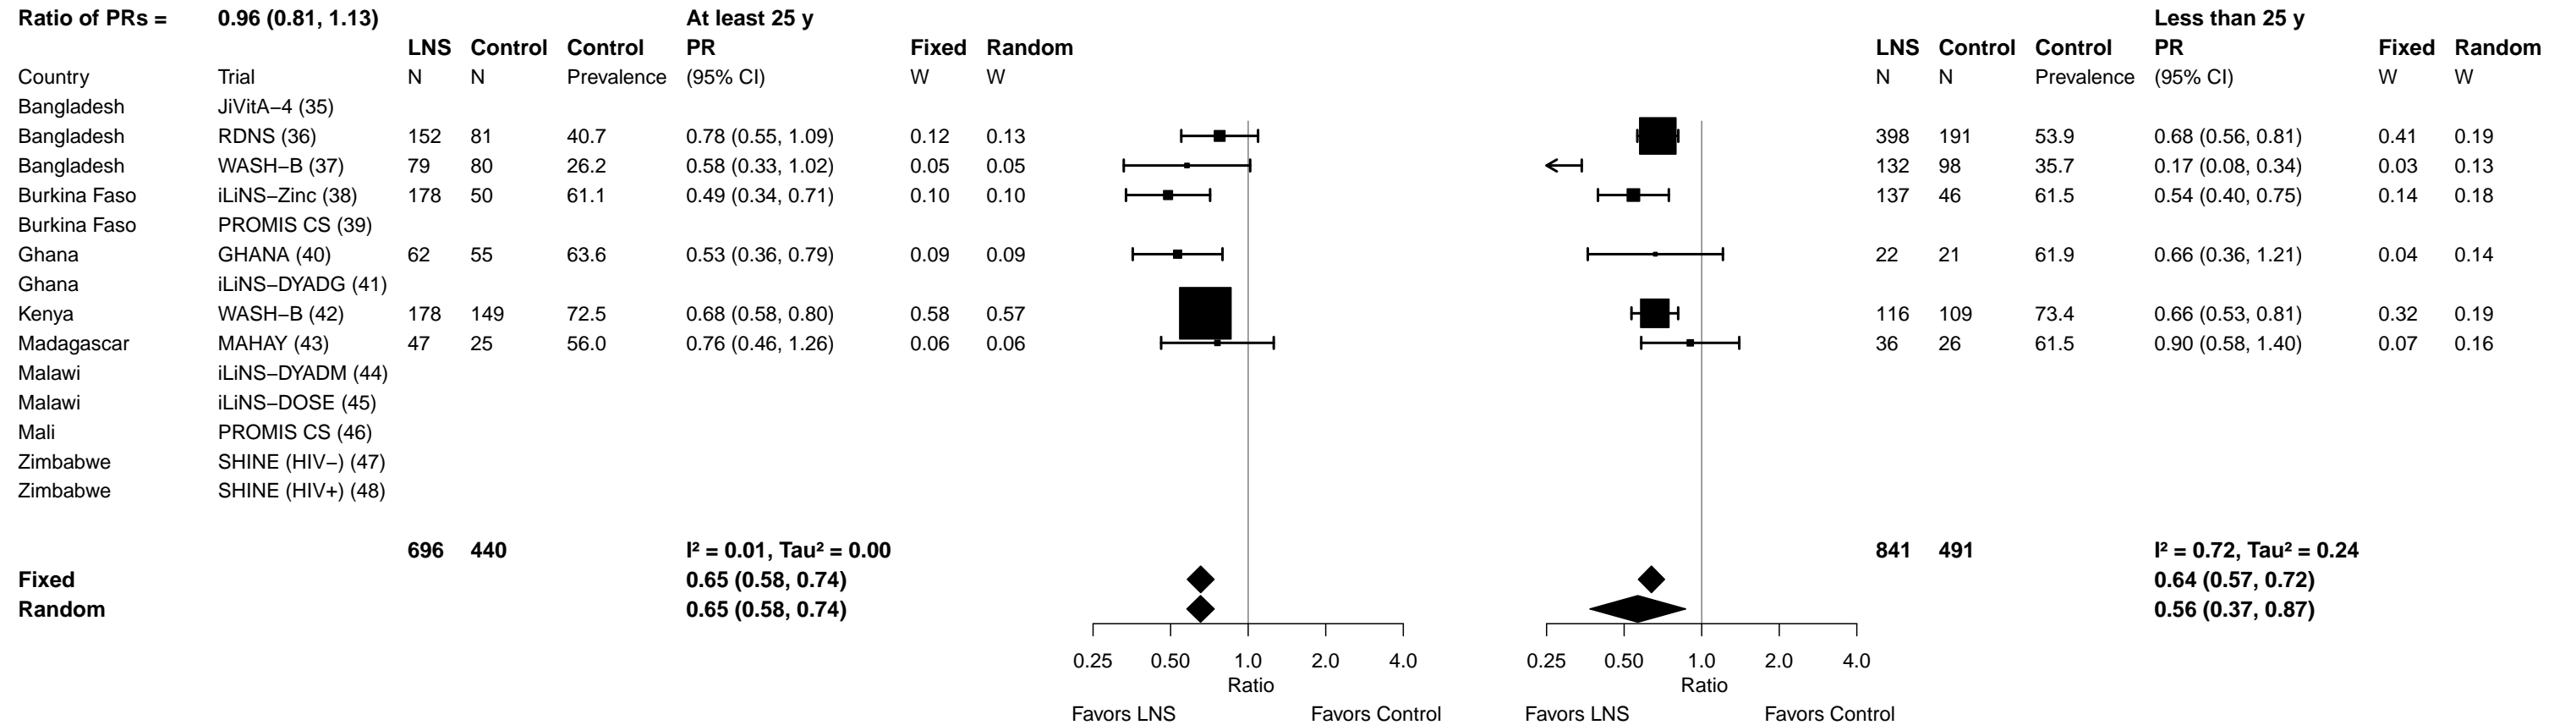

Supplemental figure 6L: Elevated soluble transferrin receptor prevalence ratio

6L3: Stratified by Maternal education

P-for-interaction = 0.227

Ratio of PRs = 1.12 (0.93, 1.35)

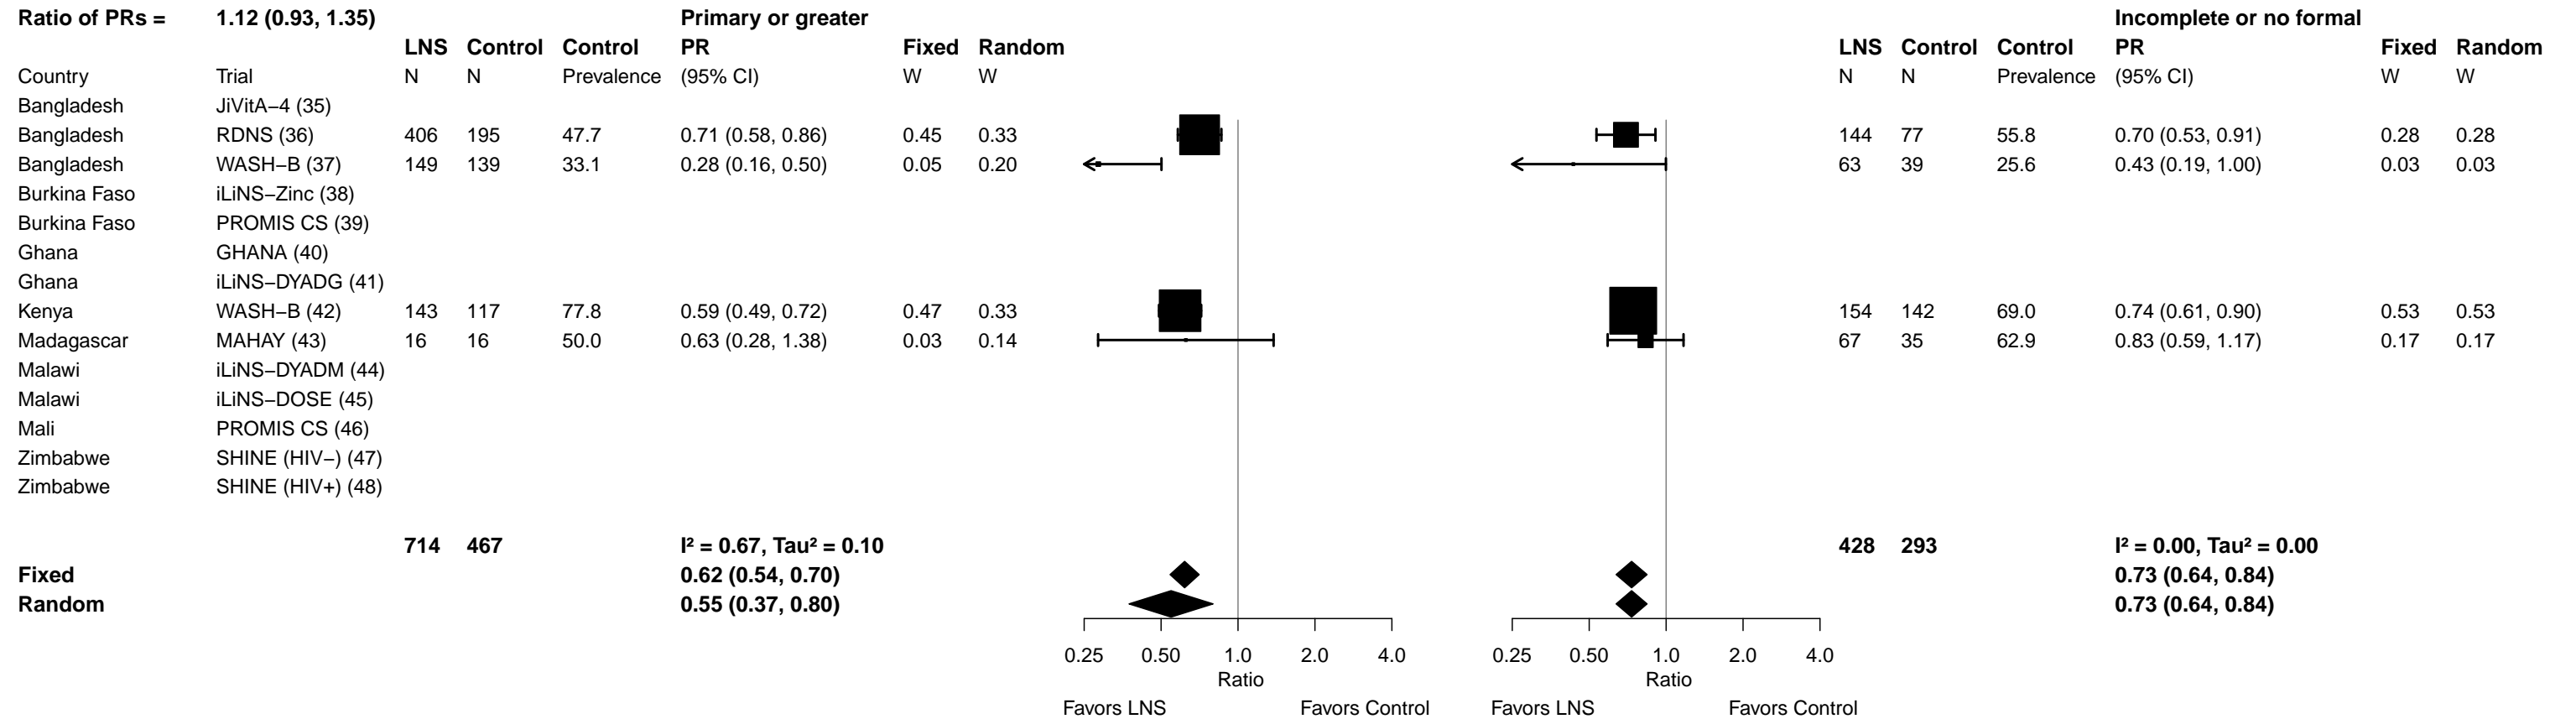

Supplemental figure 6L: Elevated soluble transferrin receptor prevalence ratio

6L4: Stratified by Child sex

P-for-interaction = 0.787

Ratio of PRs = 0.98 (0.83, 1.16)

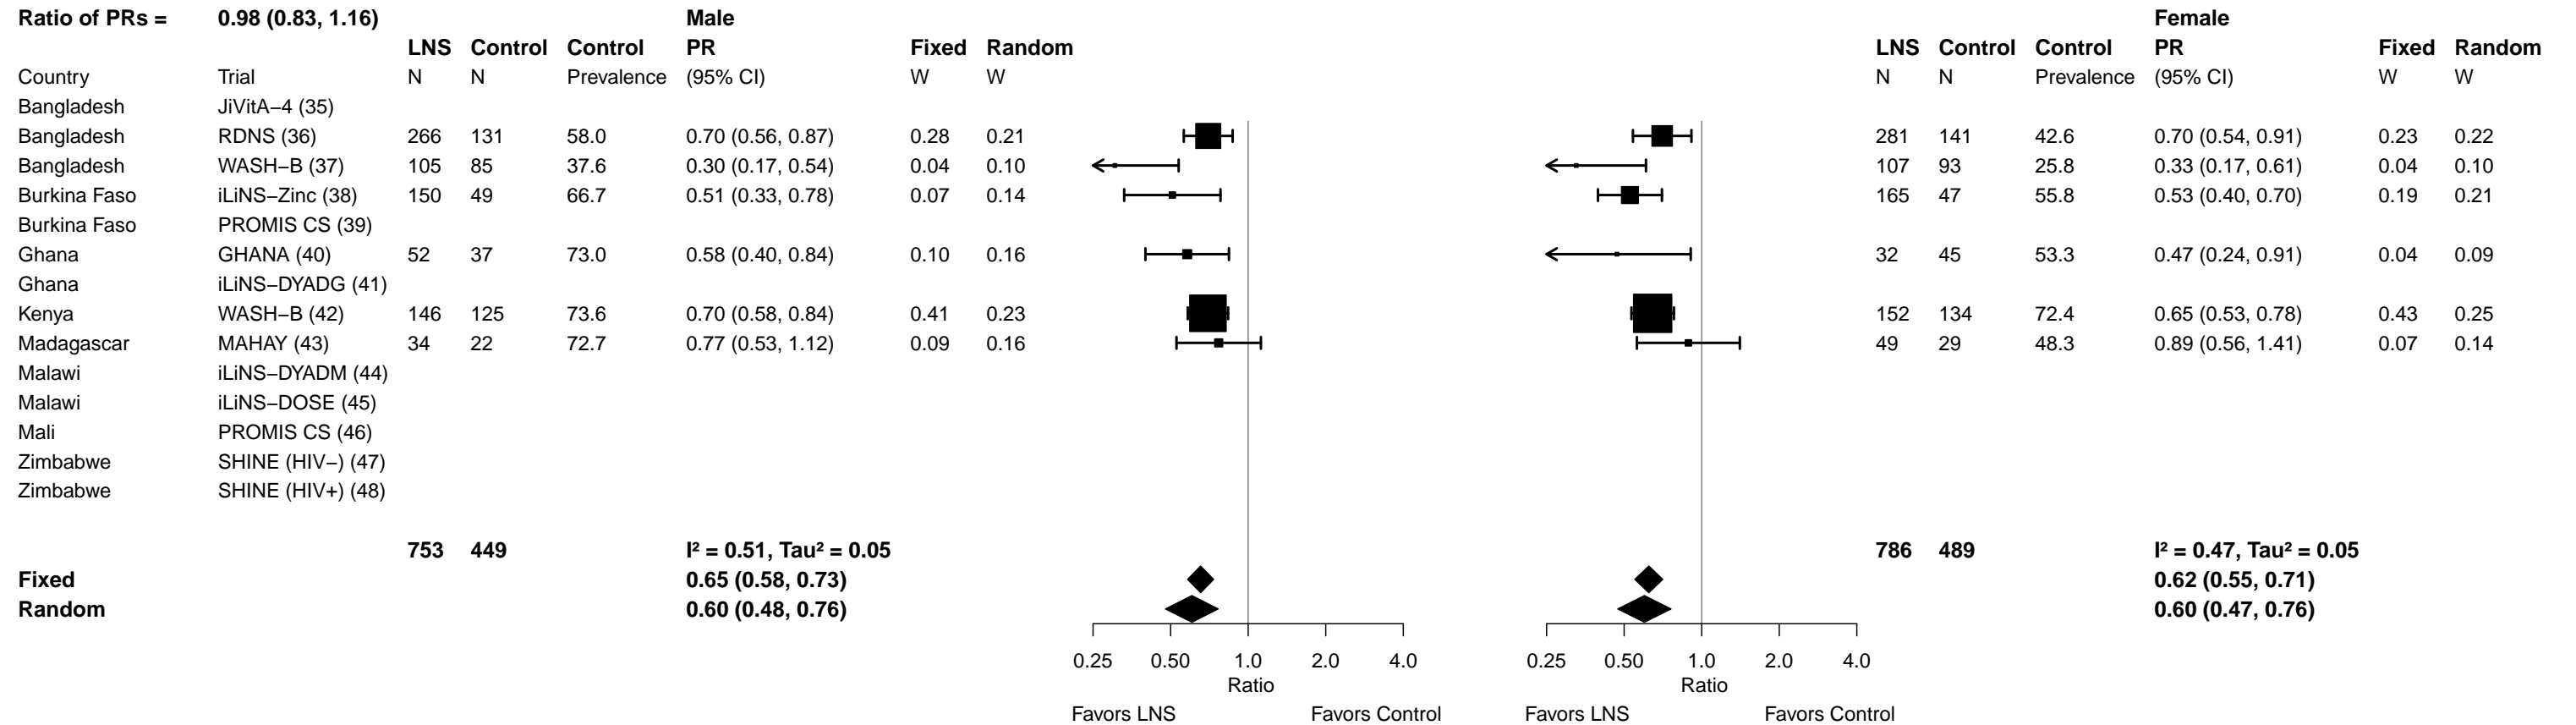

Supplemental figure 6L: Elevated soluble transferrin receptor prevalence ratio

6L5: Stratified by Child birth order

P-for-interaction = 0.638

Ratio of PRs = 0.96 (0.80, 1.15)

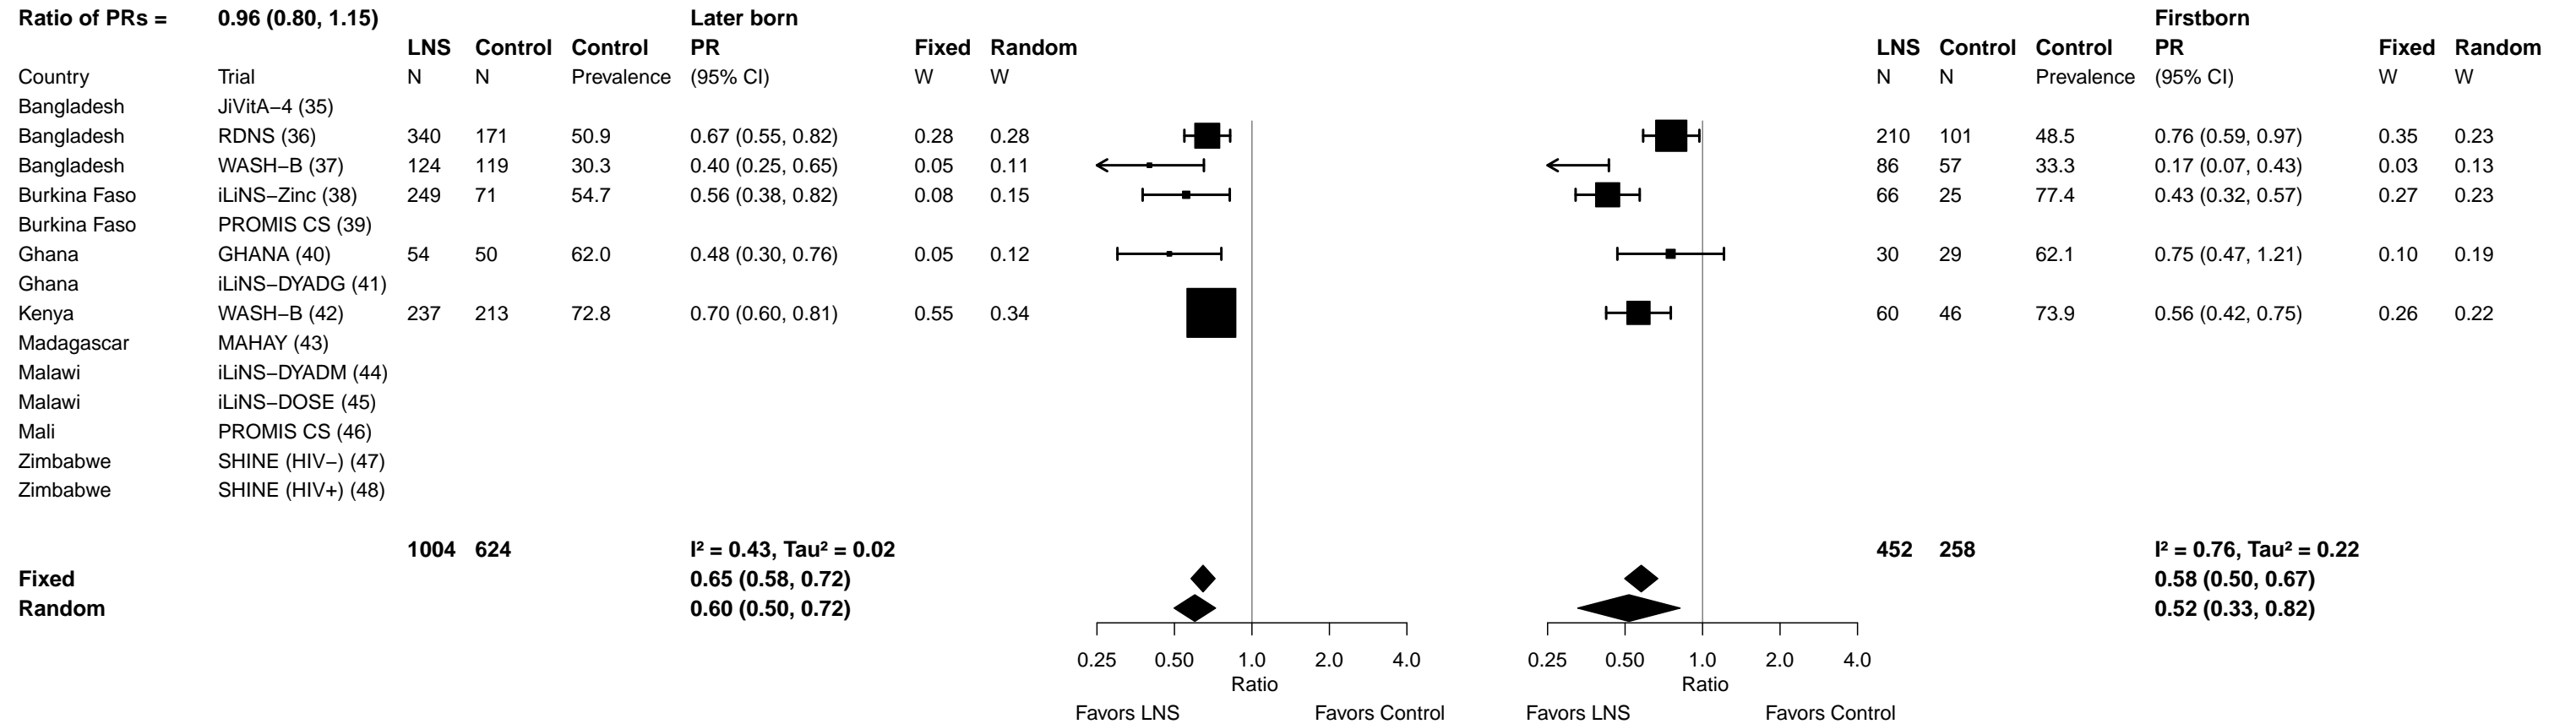

**Supplemental figure 6L: Elevated soluble transferrin receptor prevalence ratio**

**6L6: Stratified by Child baseline acute malnutrition (insufficient comparisons)**

**Supplemental figure 6L: Elevated soluble transferrin receptor prevalence ratio**

**6L7: Stratified by Child baseline anemia (insufficient comparisons)**

Supplemental figure 6L: Elevated soluble transferrin receptor prevalence ratio

6L8: Stratified by Child high-dose vitamin A supplementation

**P-for-interaction = 0.344**  
**Ratio of PRs = 1.14 (0.87, 1.51)**

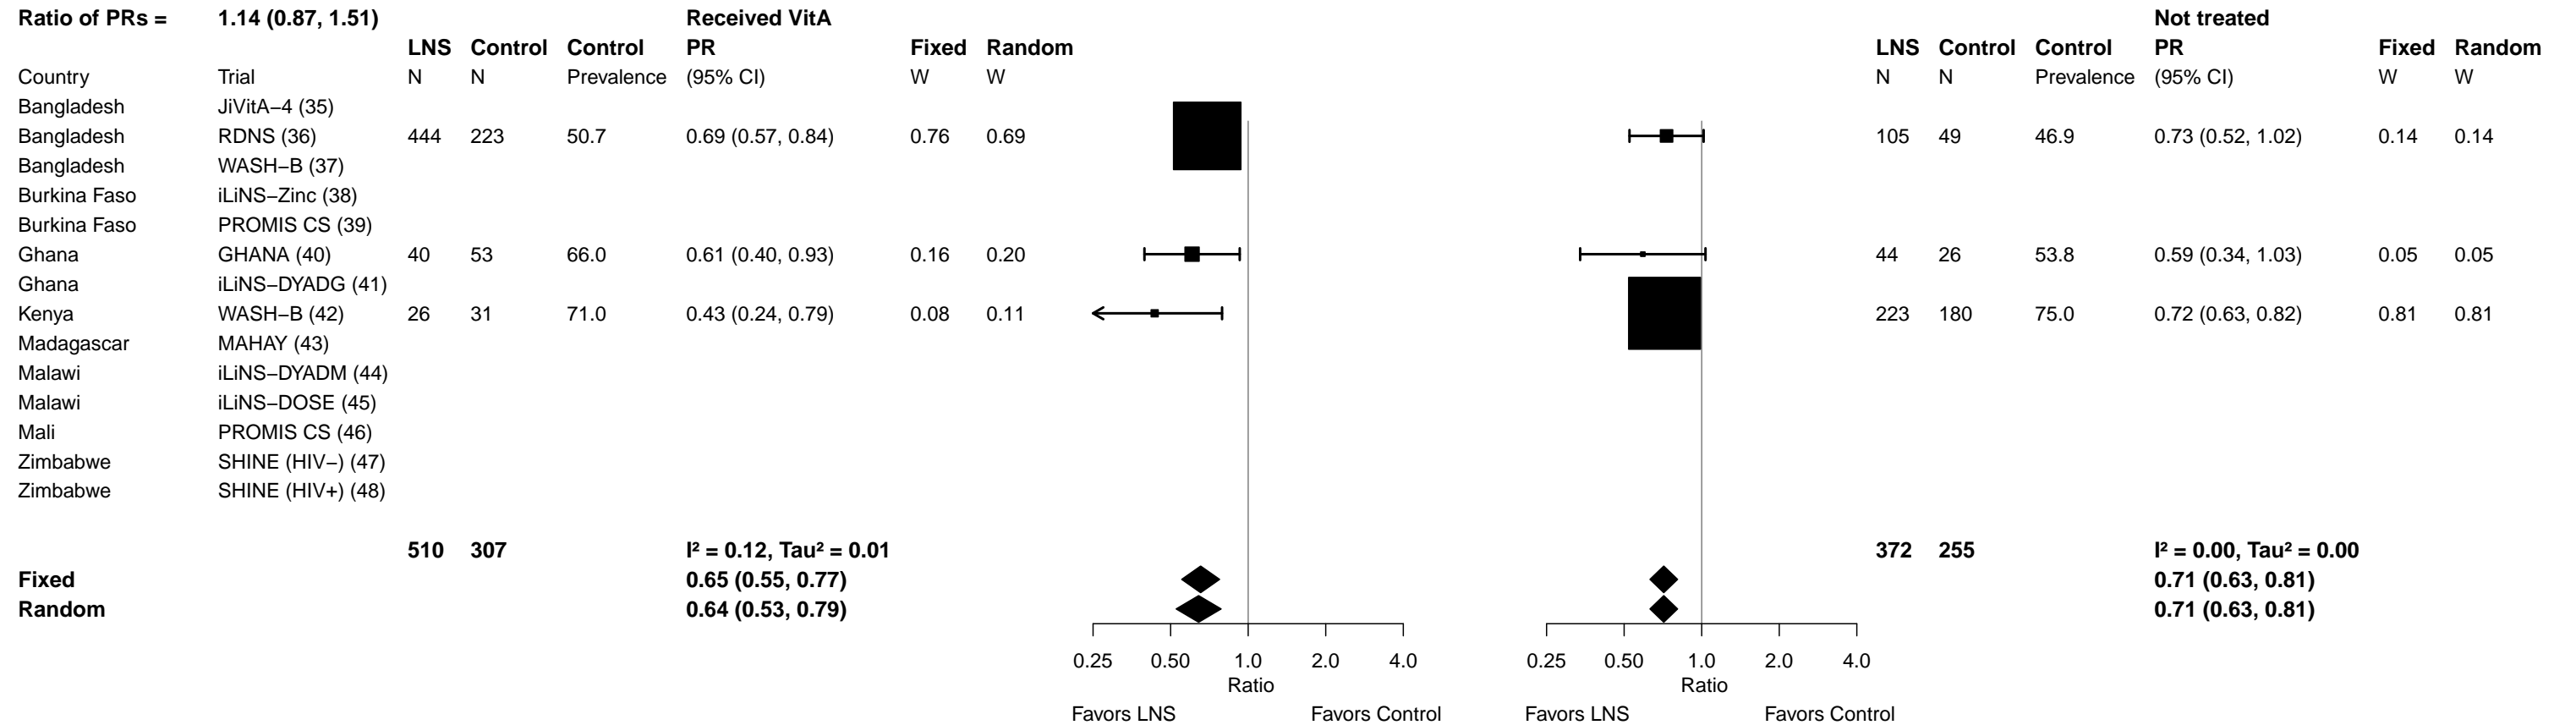



Supplemental figure 6L: Elevated soluble transferrin receptor prevalence ratio

6L9: Stratified by Child inflammation

P-for-interaction = 0.761

Ratio of PRs = 0.97 (0.82, 1.16)

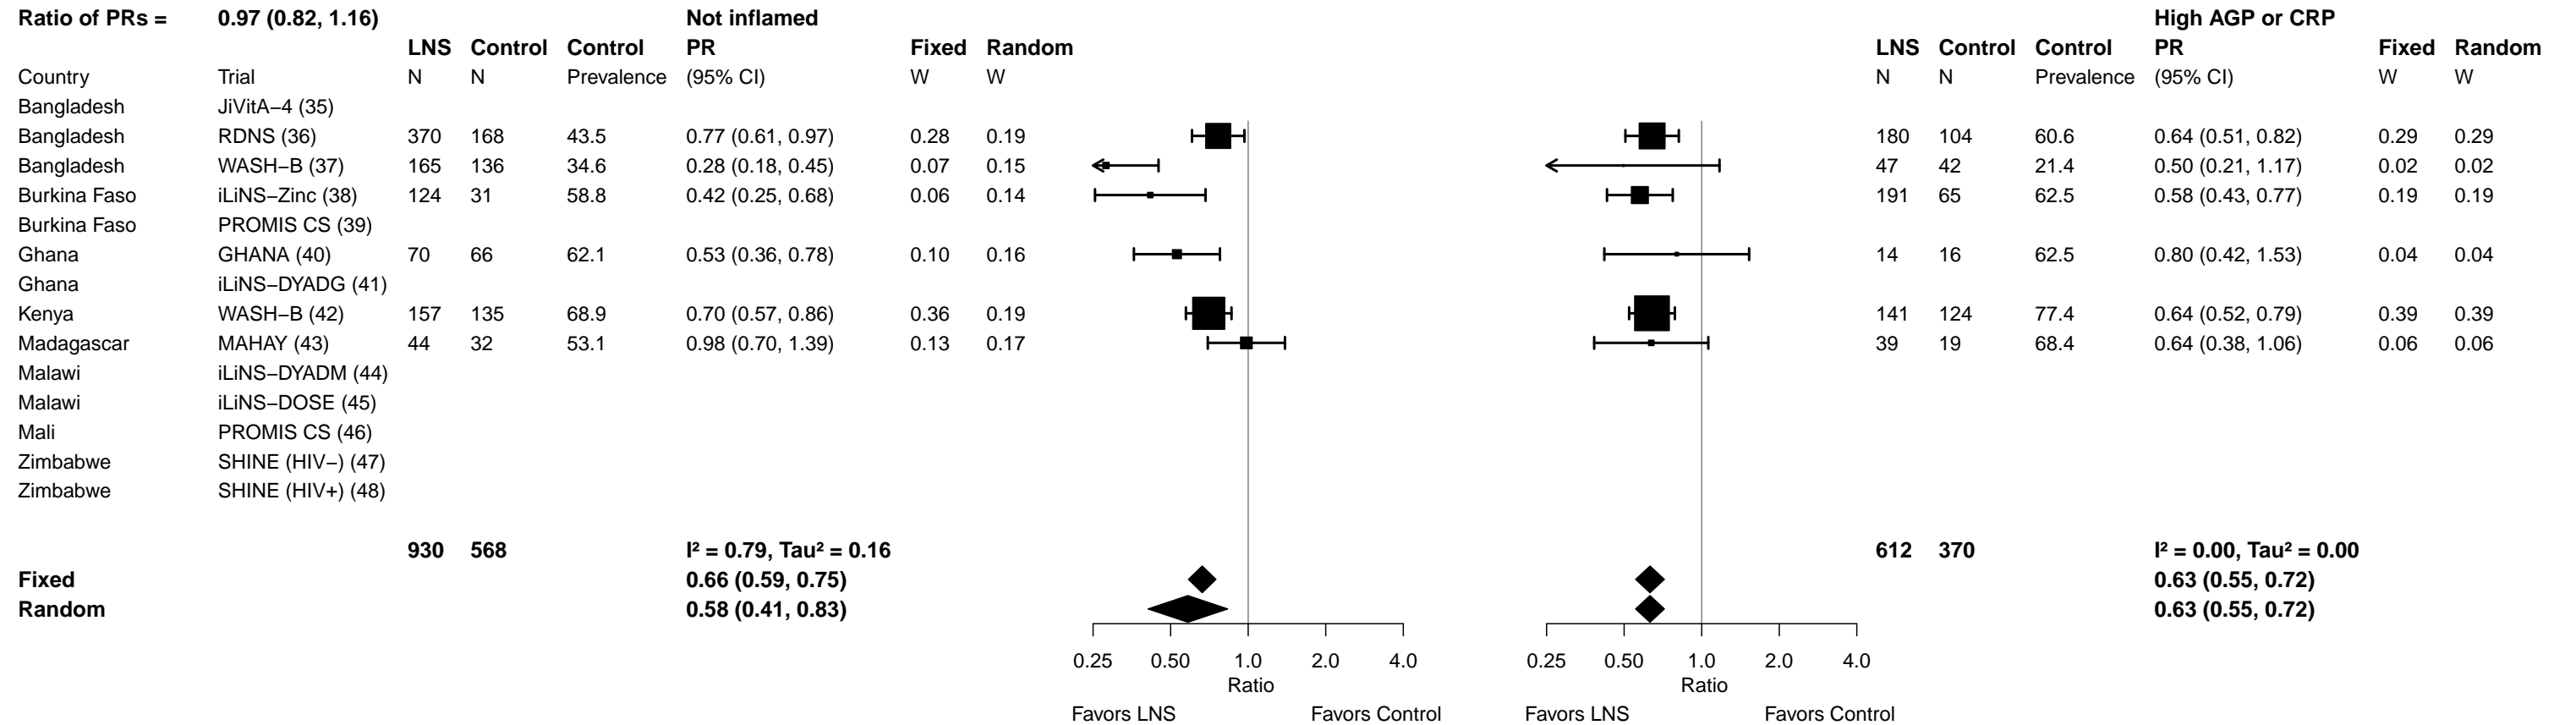

### Supplemental figure 6M: Elevated soluble transferrin receptor prevalence difference

#### 6M1: Stratified by Maternal BMI

**P-for-interaction = 0.187**

**Difference in PDs = -0.07 (-0.17, 0.03)**

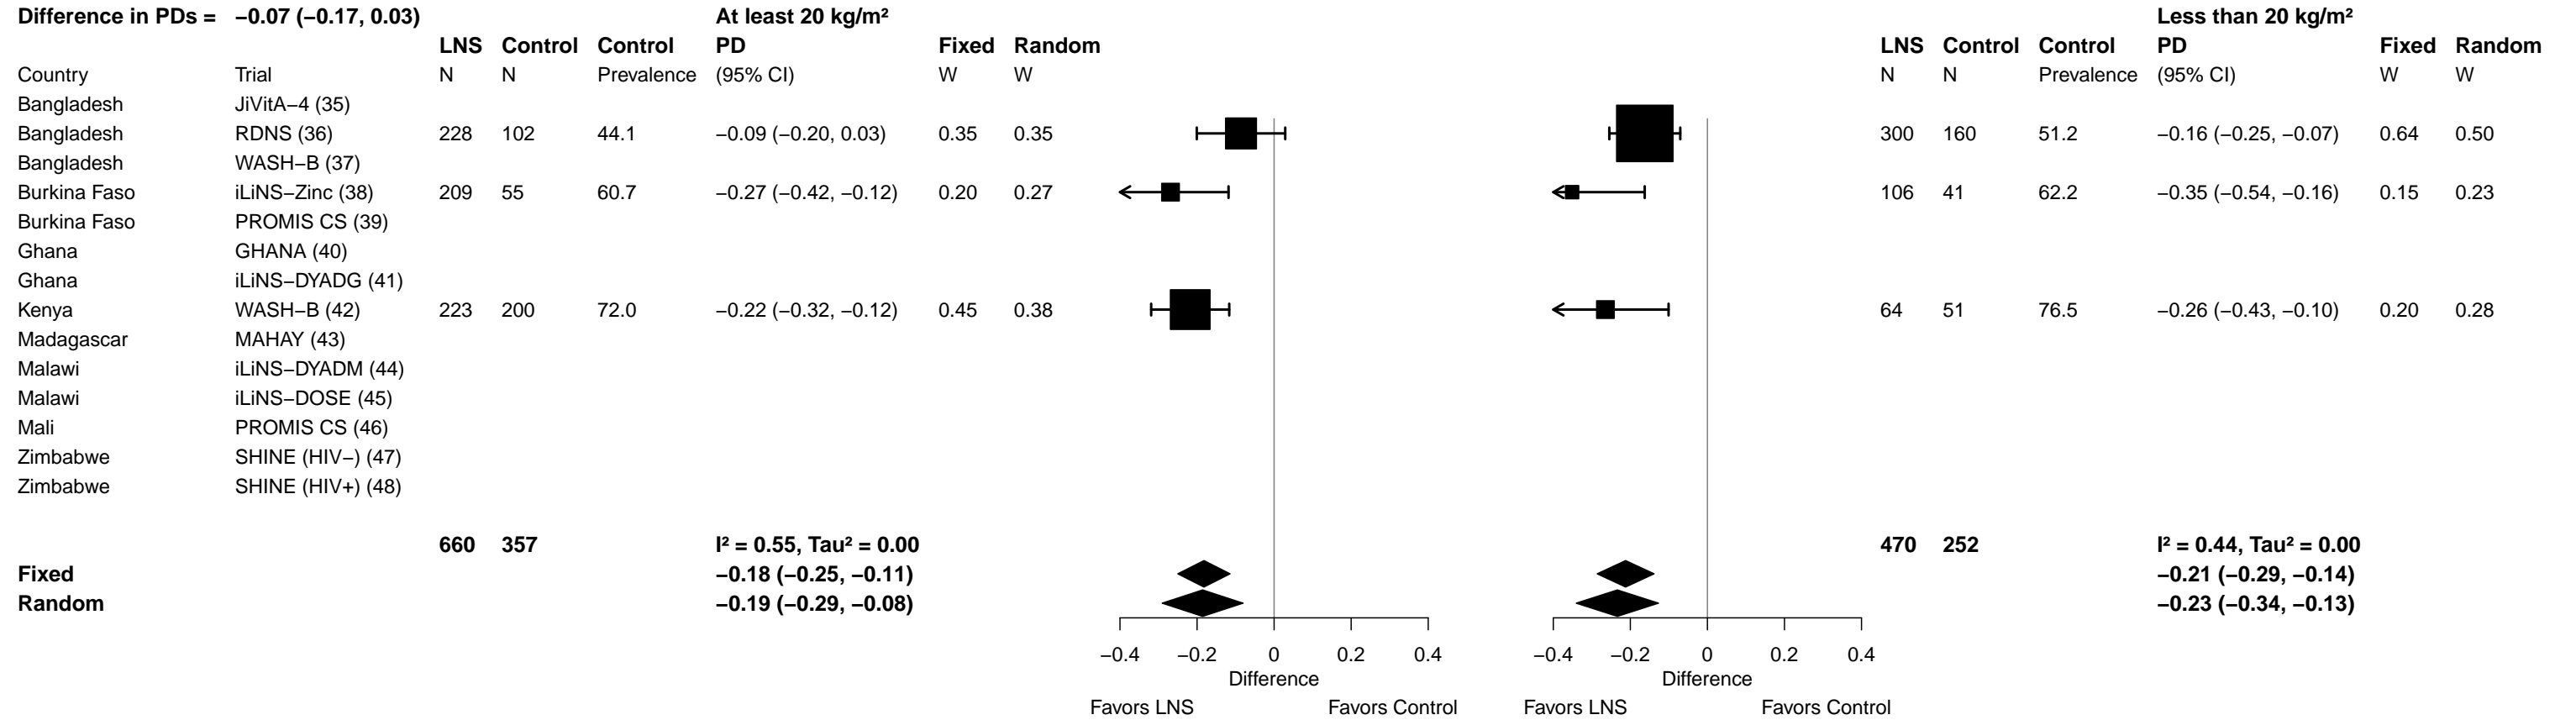

Supplemental figure 6M: Elevated soluble transferrin receptor prevalence difference

6M2: Stratified by Maternal age

**P-for-interaction = 0.142**

**Difference in PDs = -0.06 (-0.14, 0.02)**

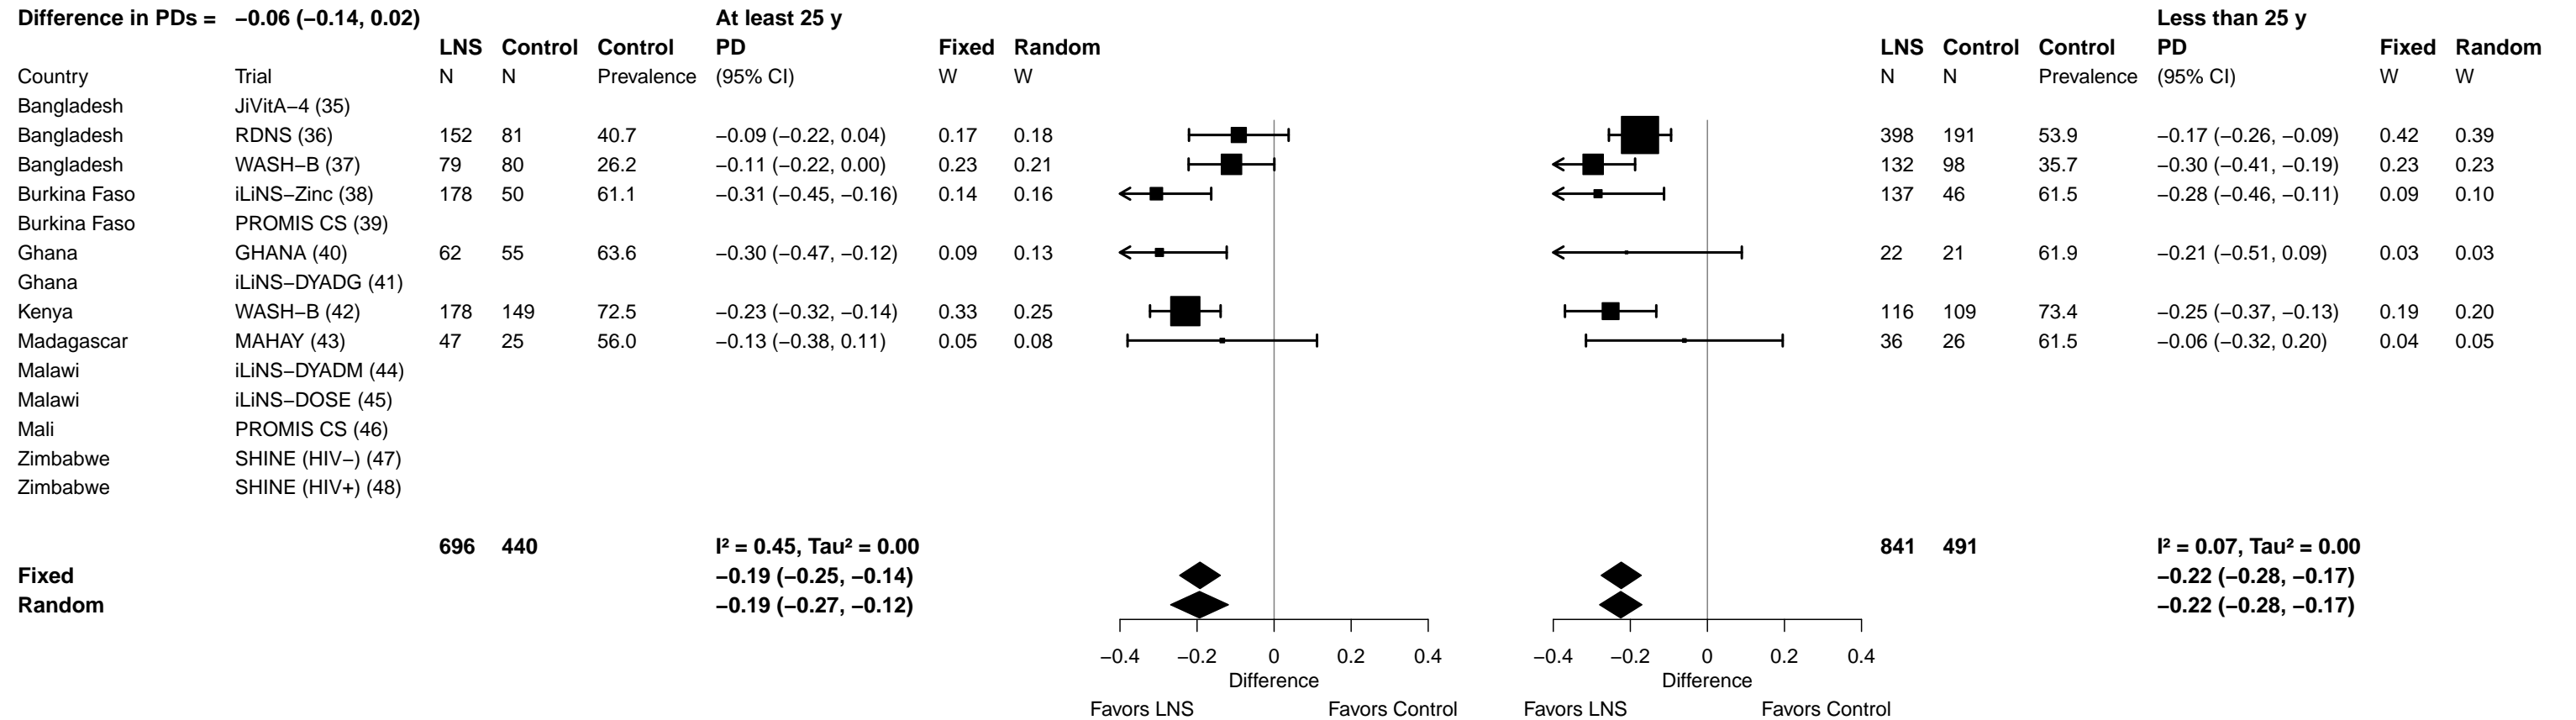

Supplemental figure 6M: Elevated soluble transferrin receptor prevalence difference

6M3: Stratified by Maternal education

P-for-interaction = 0.157

Difference in PDs = 0.07 (-0.03, 0.16)

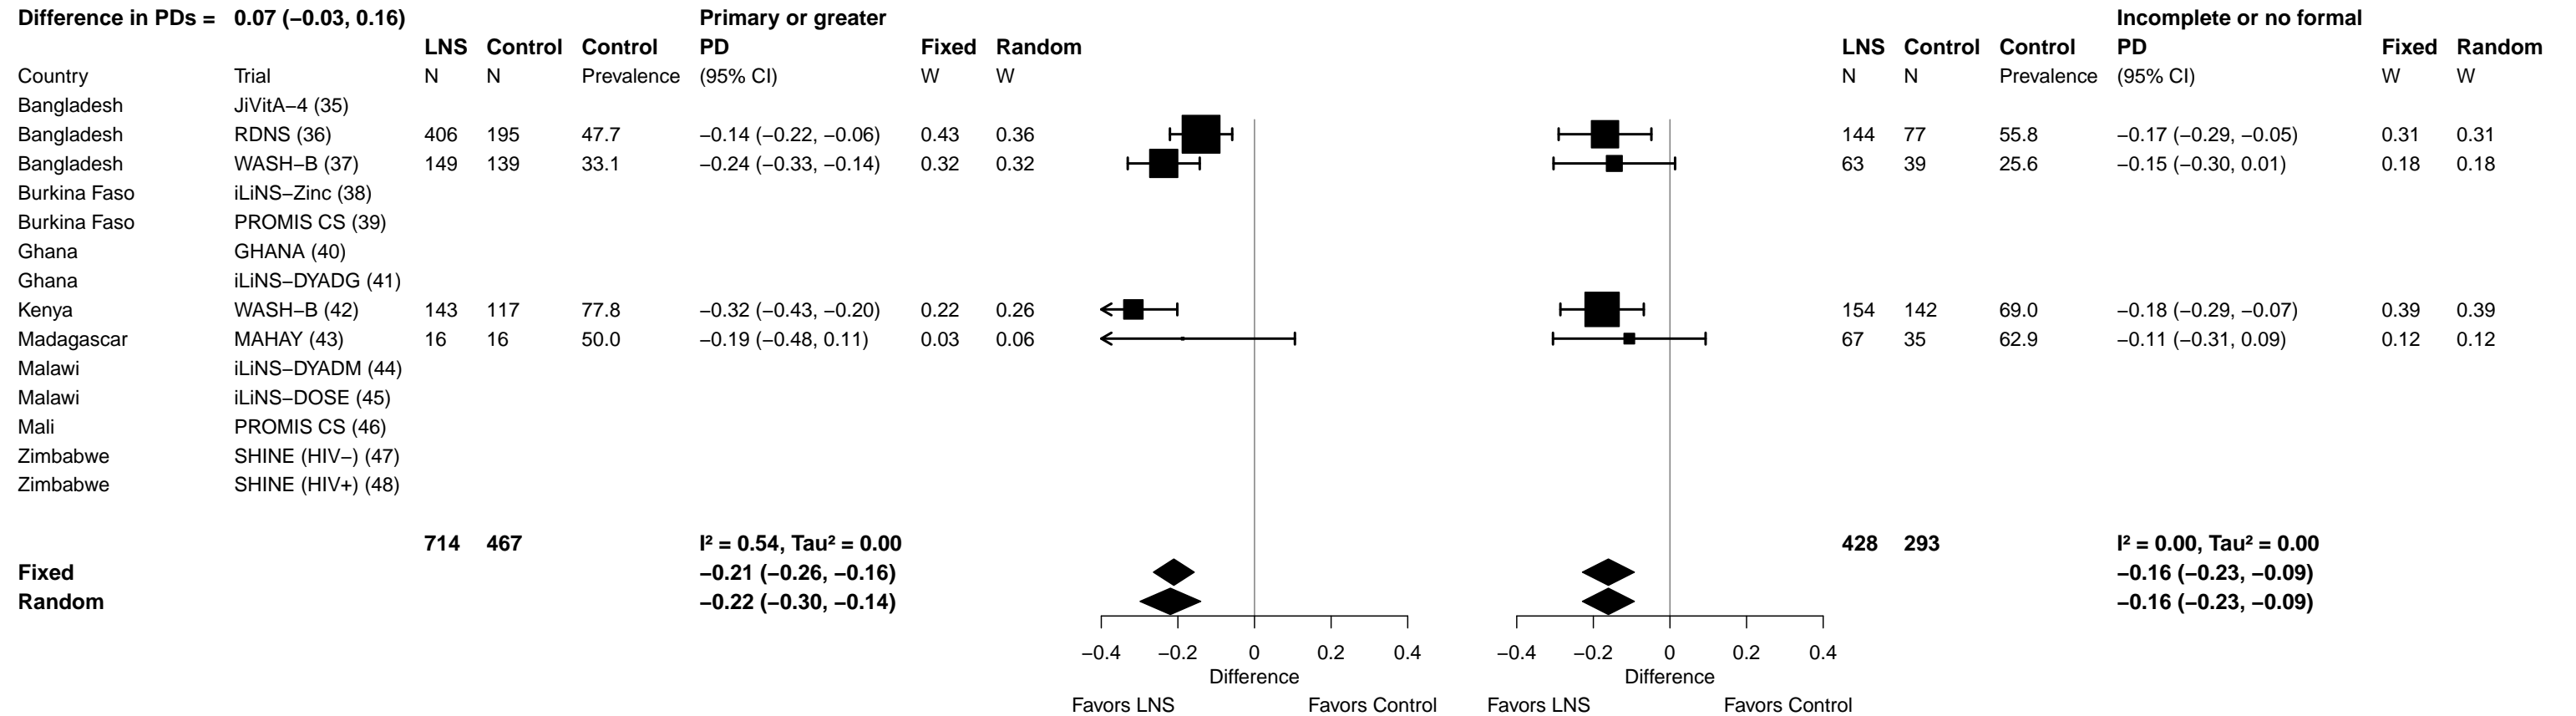

Supplemental figure 6M: Elevated soluble transferrin receptor prevalence difference

6M4: Stratified by Child sex

P-for-interaction = 0.322

Difference in PDs = 0.04 (-0.04, 0.11)

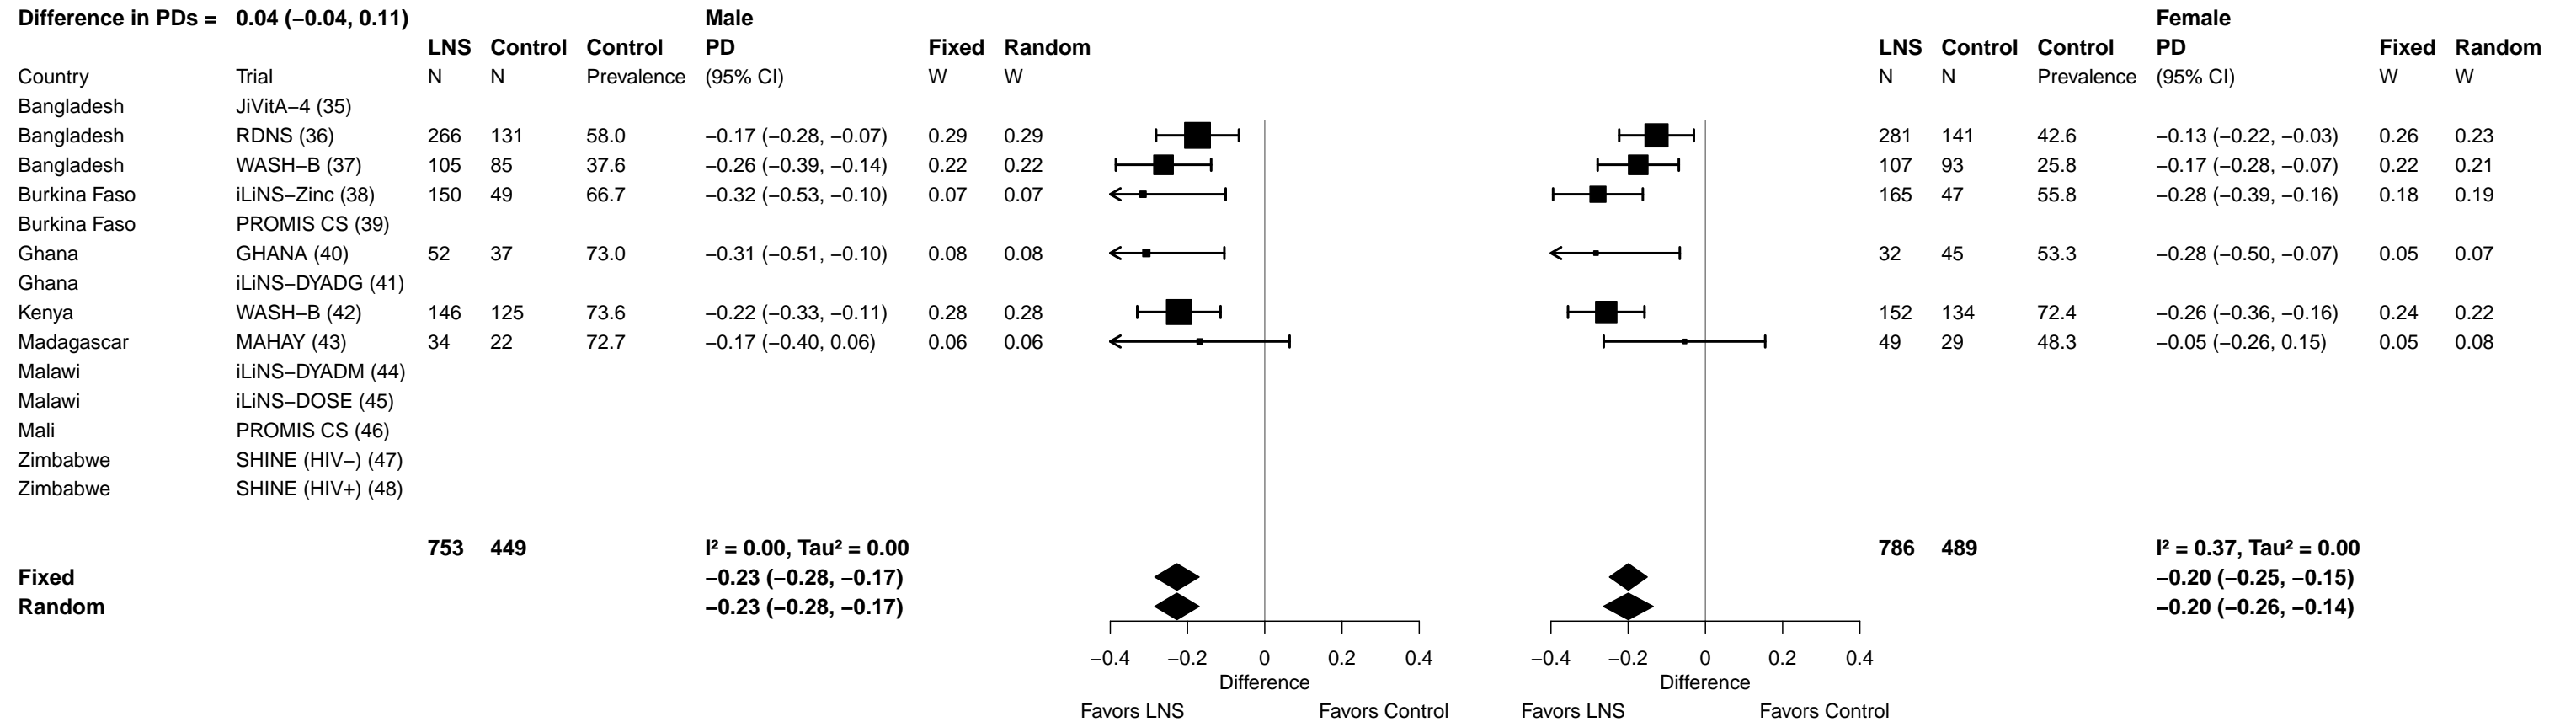

Supplemental figure 6M: Elevated soluble transferrin receptor prevalence difference

6M5: Stratified by Child birth order

P-for-interaction = 0.285

Difference in PDs = -0.05 (-0.13, 0.04)

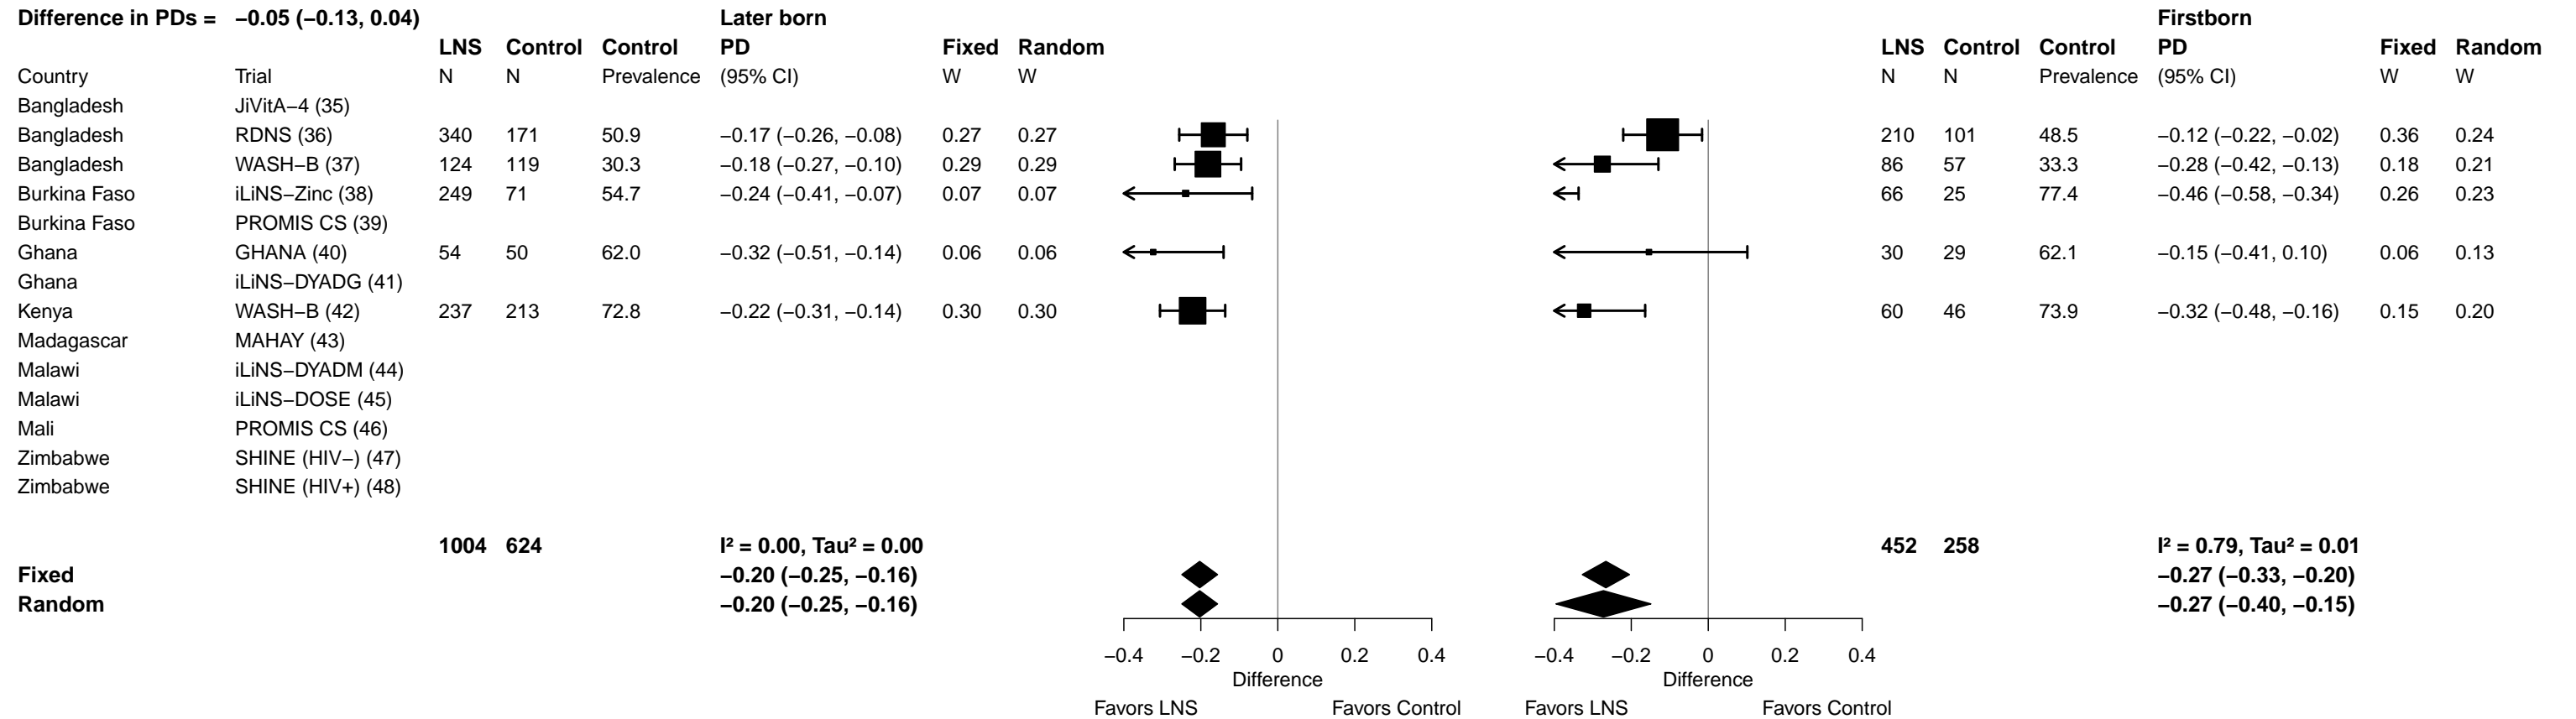

**Supplemental figure 6M: Elevated soluble transferrin receptor prevalence difference**

**6M6: Stratified by Child baseline acute malnutrition (insufficient comparisons)**

**Supplemental figure 6M: Elevated soluble transferrin receptor prevalence difference**

**6M7: Stratified by Child baseline anemia (insufficient comparisons)**



Supplemental figure 6M: Elevated soluble transferrin receptor prevalence difference

6M8: Stratified by Child high-dose vitamin A supplementation

P-for-interaction = 0.272

Difference in PDs = 0.08 (-0.06, 0.21)

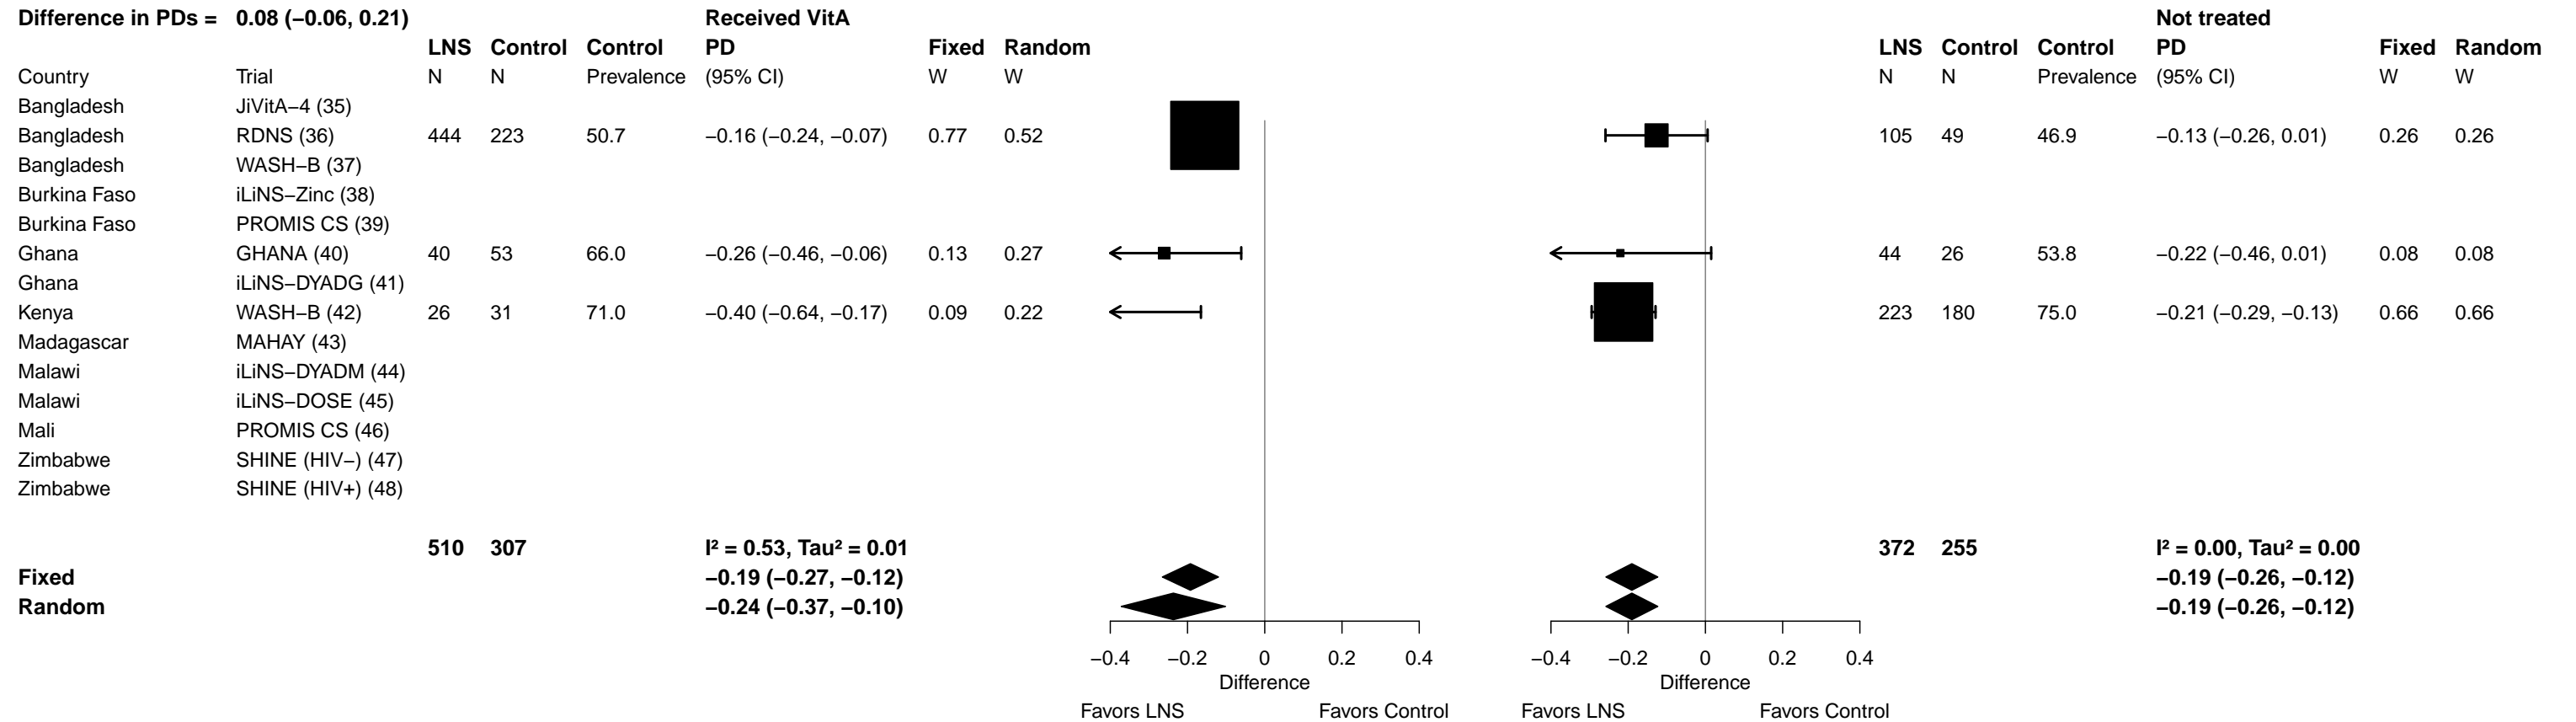

Supplemental figure 6M: Elevated soluble transferrin receptor prevalence difference

6M9: Stratified by Child inflammation

**P-for-interaction = 0.599**

**Difference in PDs = -0.02 (-0.10, 0.06)**

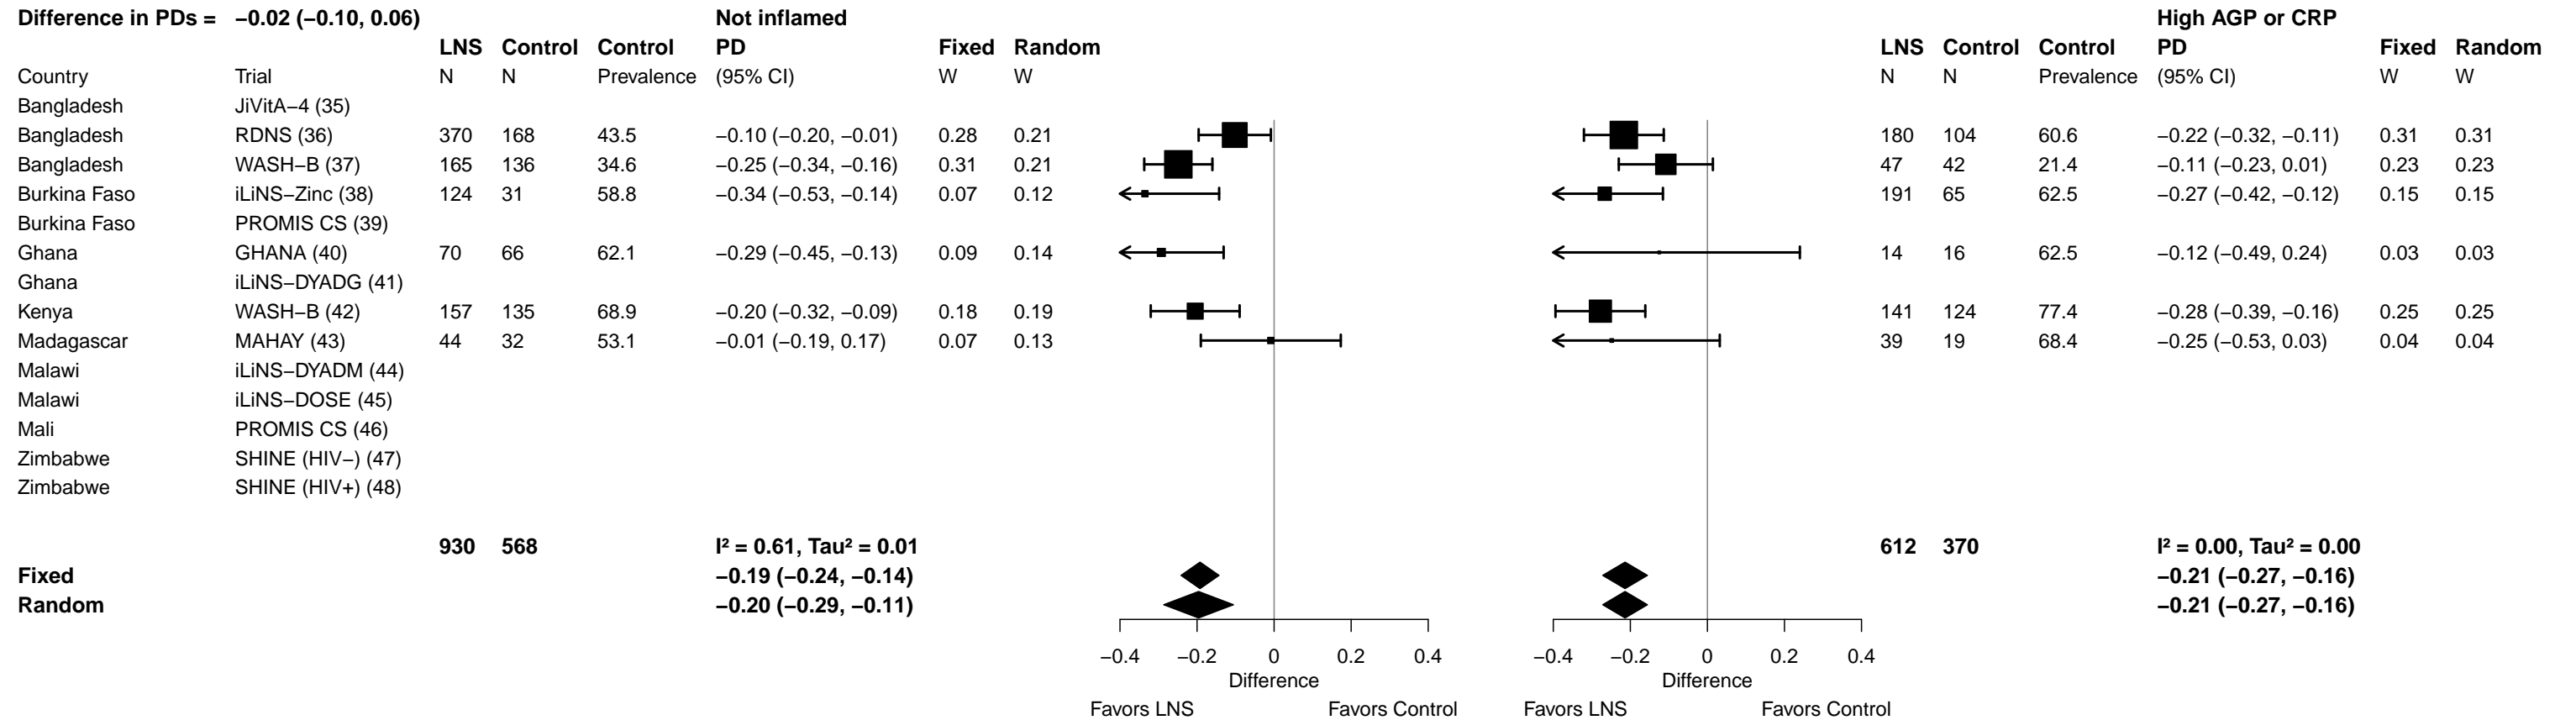

### Supplemental figure 6N: Geometric mean ratio of zinc protoporphyrin concentration

#### 6N1: Stratified by Maternal BMI

**P-for-interaction = 0.792**  
**Ratio of GMRs = 0.98 (0.85, 1.13)**

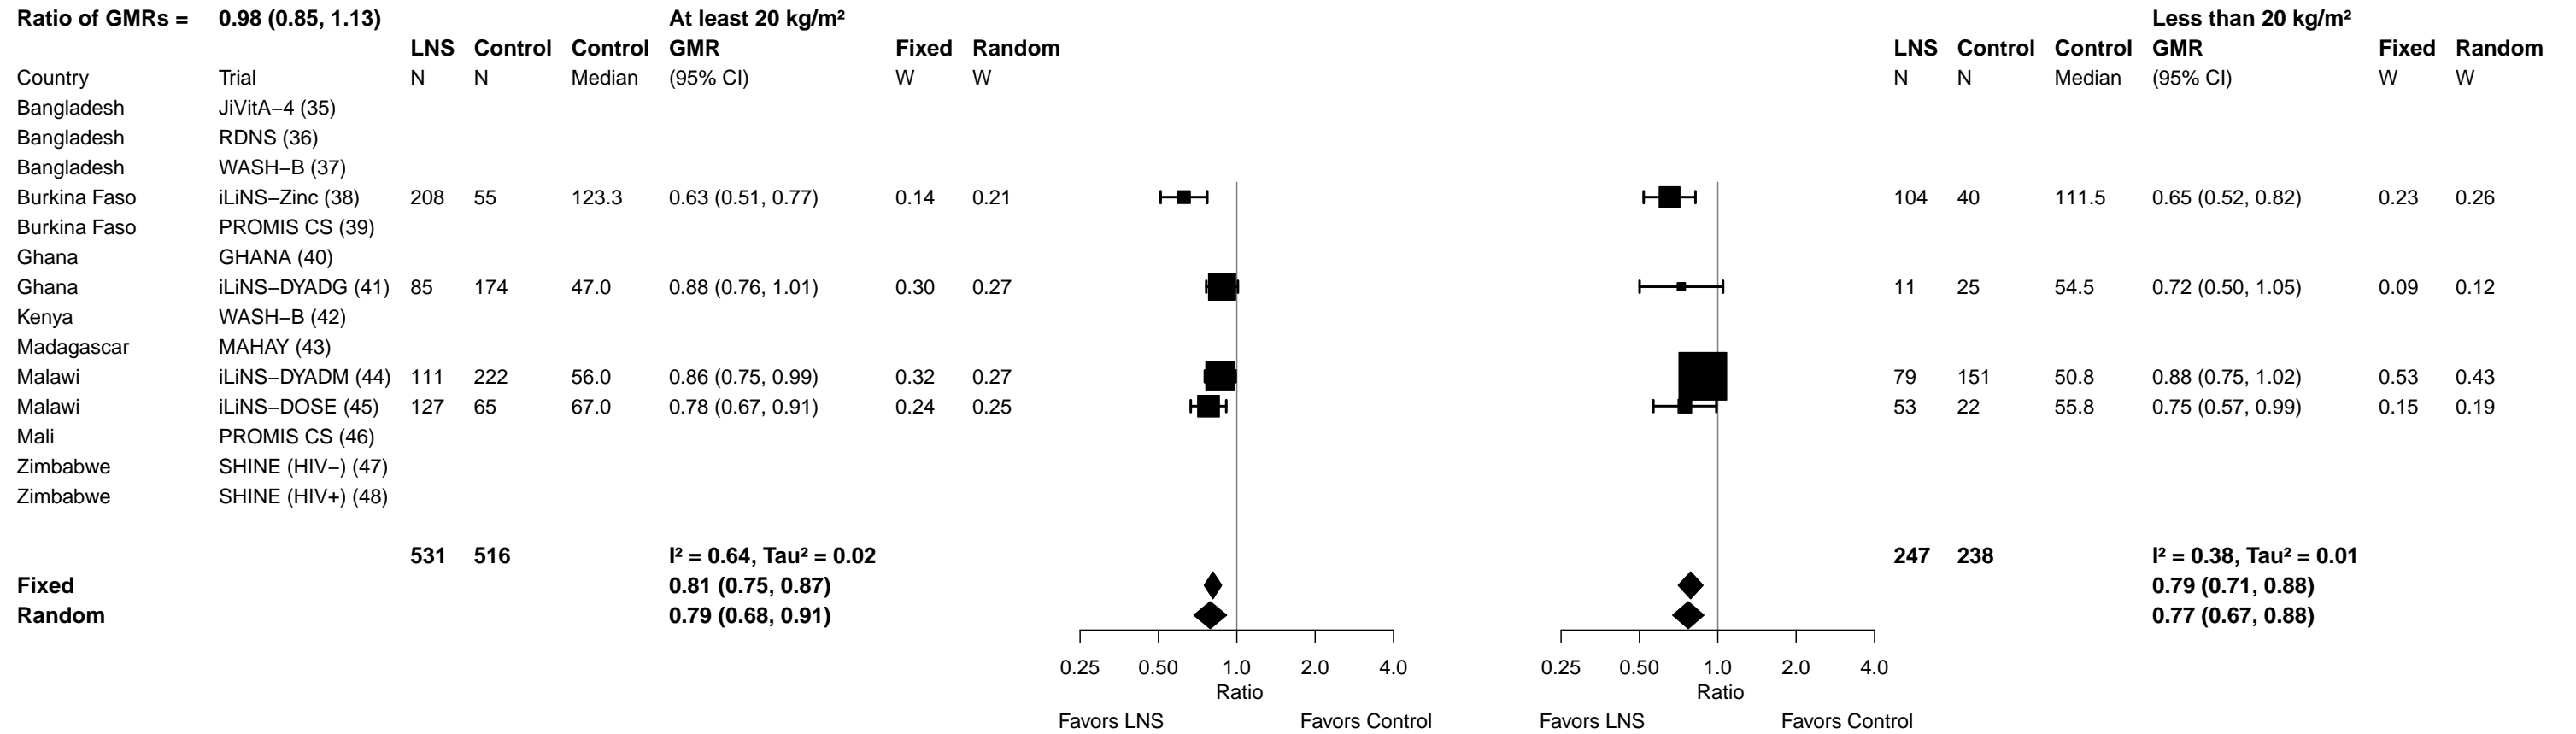

Supplemental figure 6N: Geometric mean ratio of zinc protoporphyrin concentration

6N2: Stratified by Maternal age

**P-for-interaction = 0.998**  
**Ratio of GMRs = 1.00 (0.88, 1.14)**

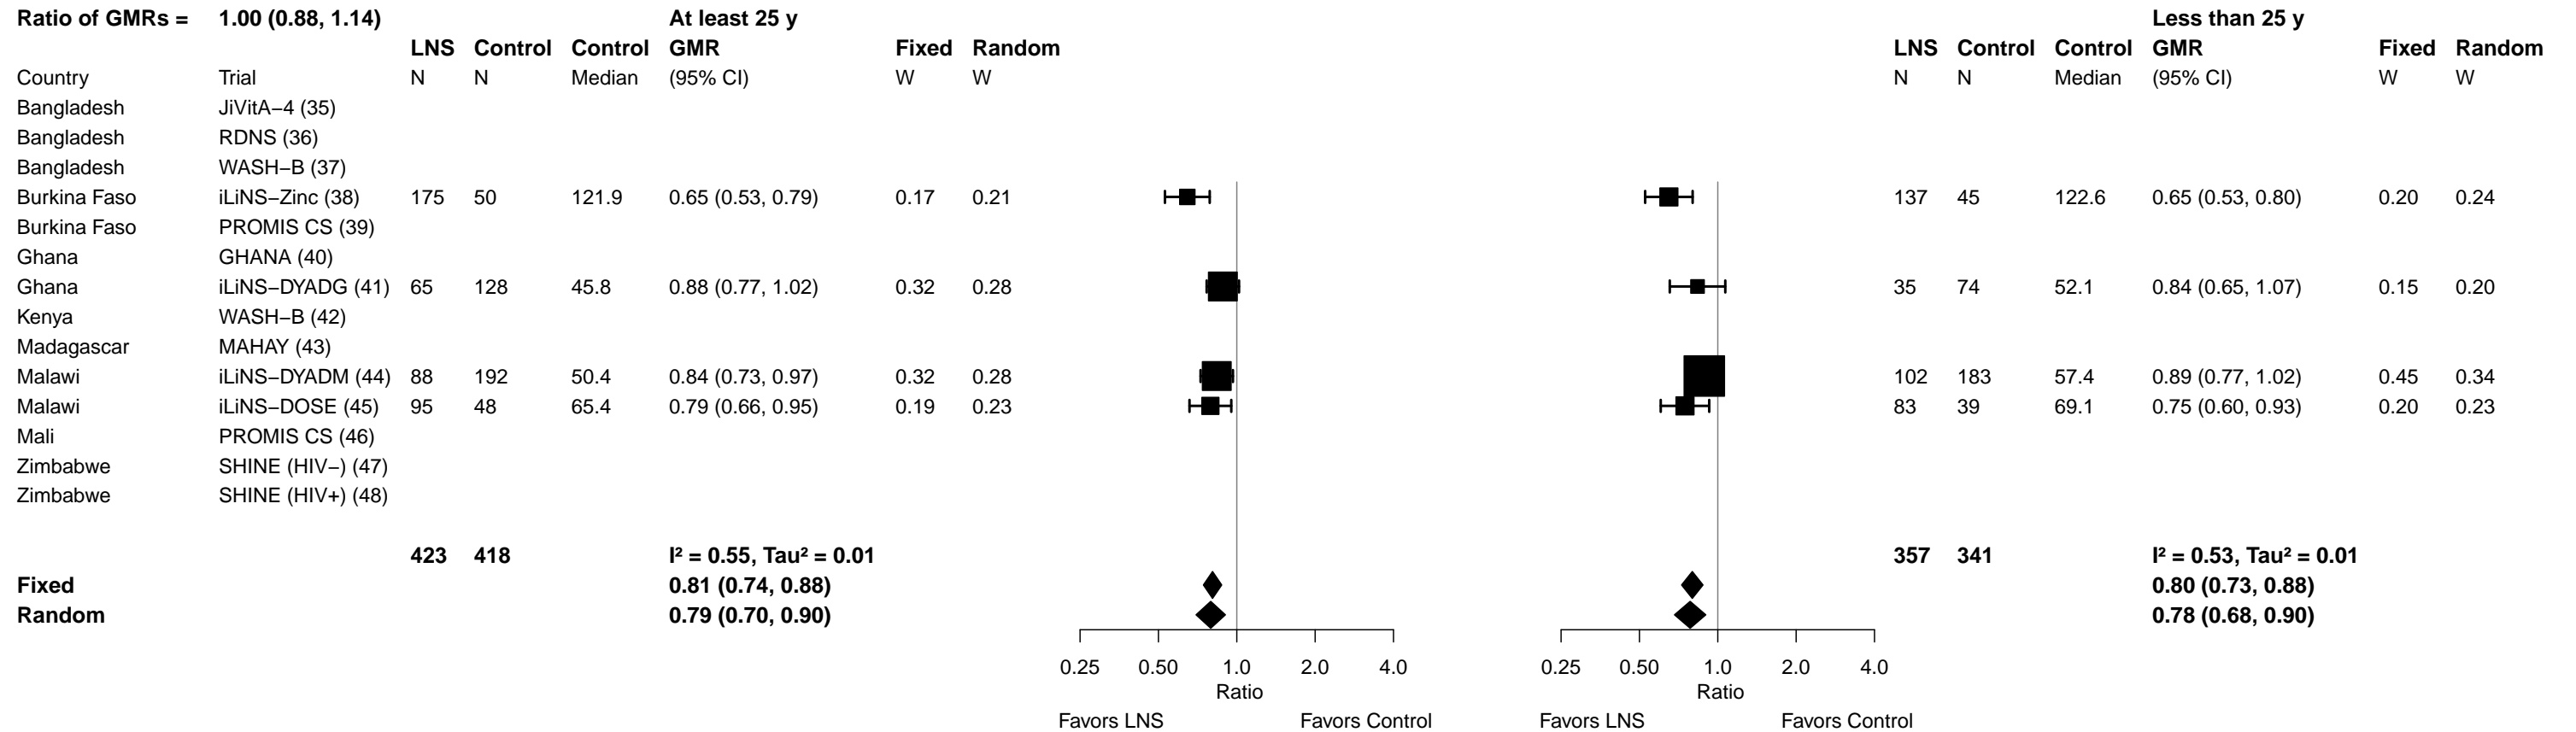

Supplemental figure 6N: Geometric mean ratio of zinc protoporphyrin concentration

6N3: Stratified by Maternal education

**P-for-interaction = 0.117**  
**Ratio of GMRs = 1.15 (0.97, 1.37)**

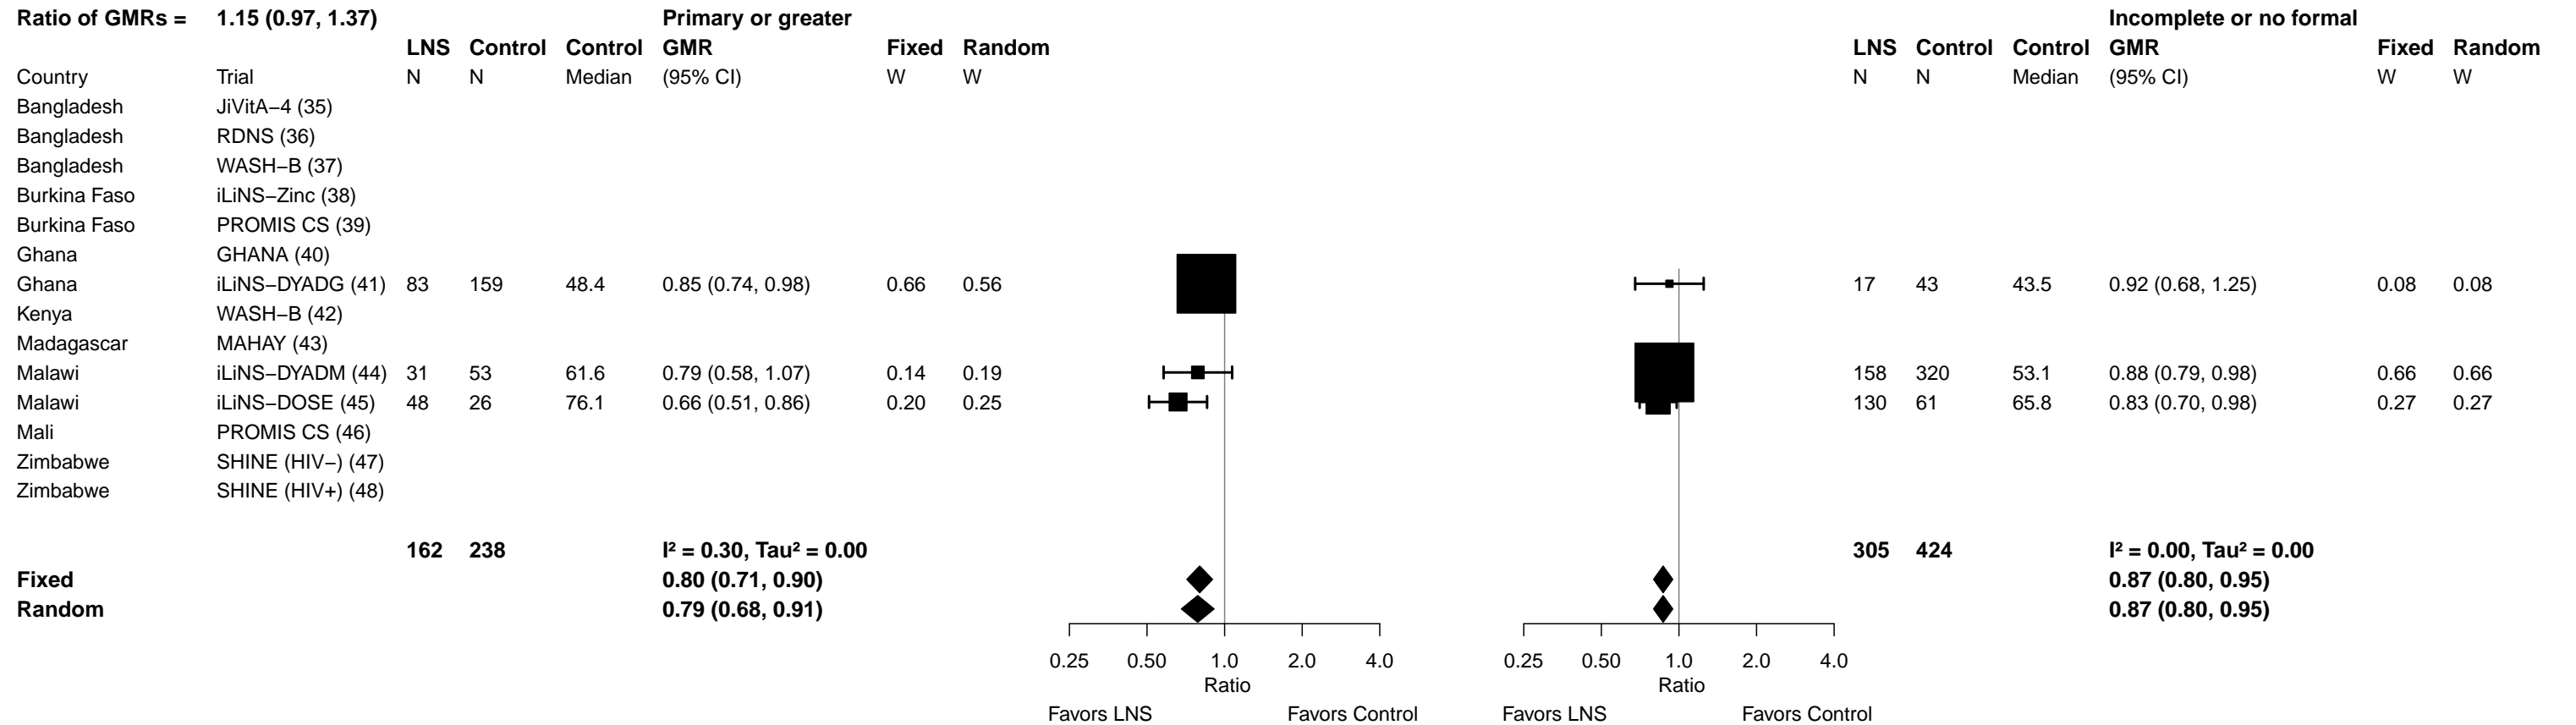

Supplemental figure 6N: Geometric mean ratio of zinc protoporphyrin concentration

6N4: Stratified by Child sex

**P-for-interaction = 0.040**  
**Ratio of GMRs = 1.13 (1.01, 1.27)**

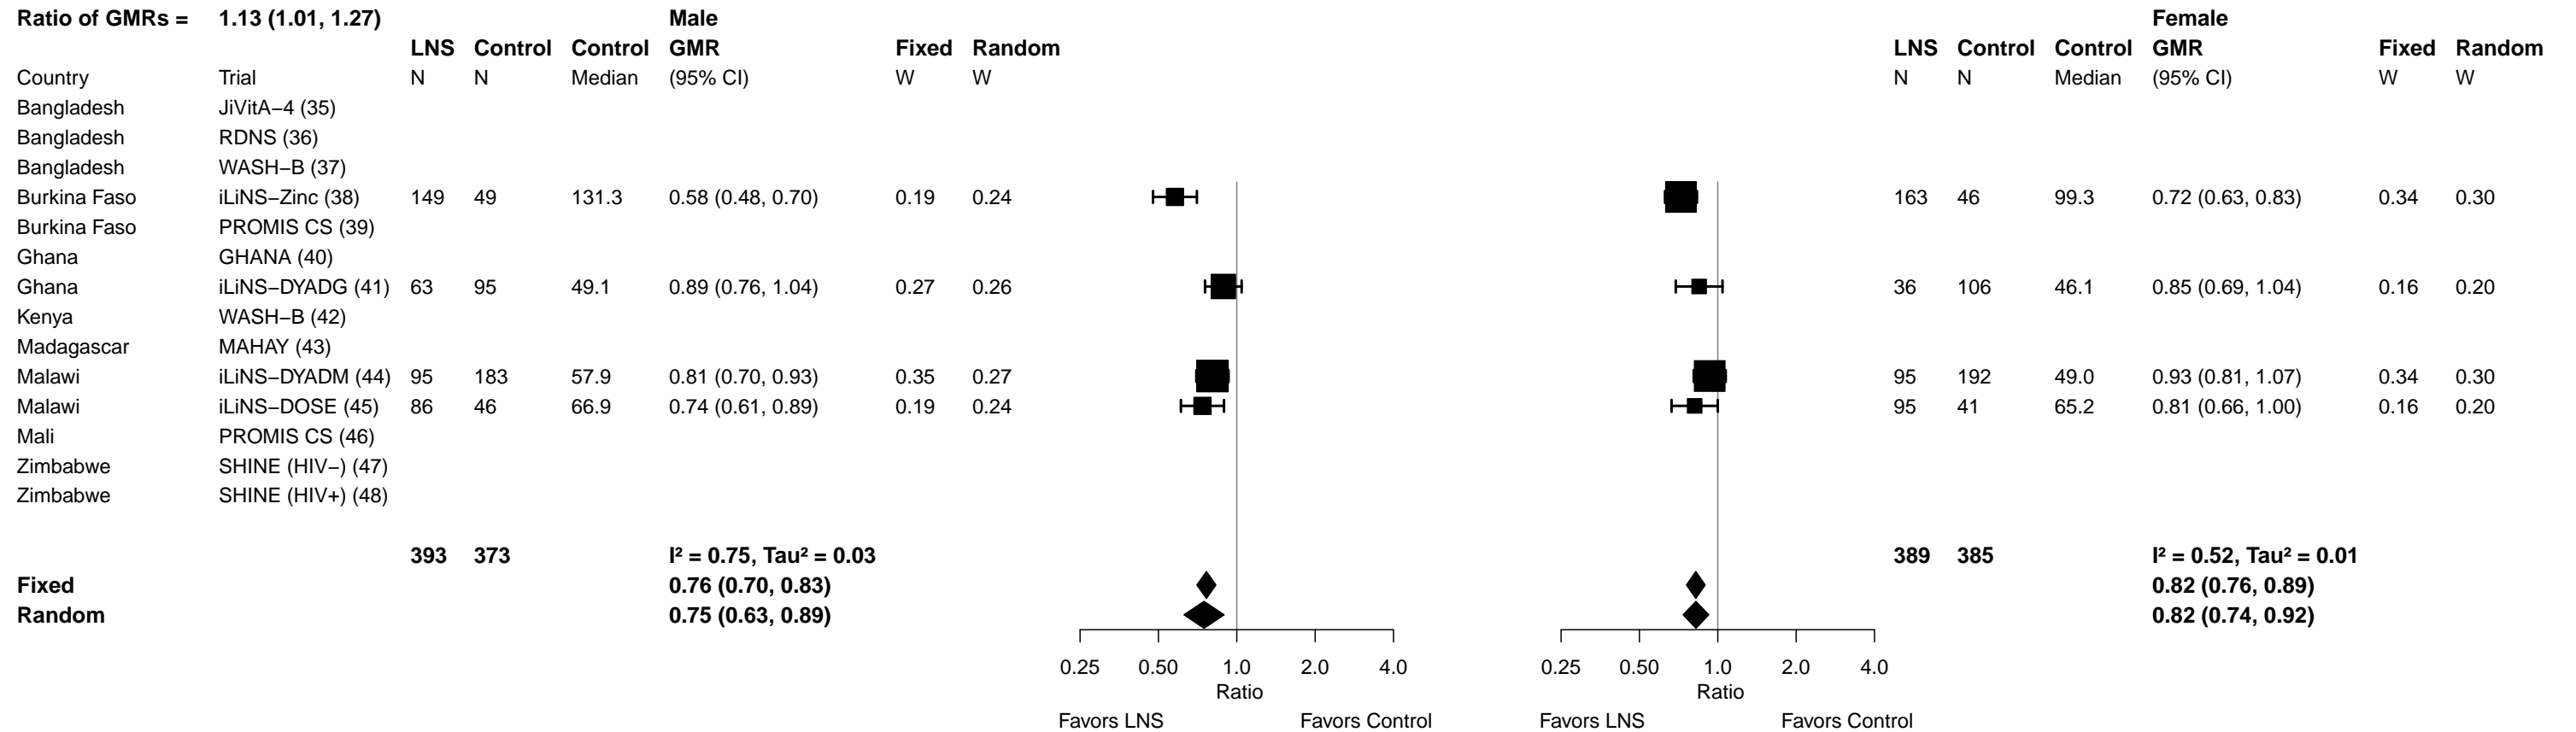

Supplemental figure 6N: Geometric mean ratio of zinc protoporphyrin concentration

6N5: Stratified by Child birth order

**P-for-interaction = 0.311**  
**Ratio of GMRs = 0.93 (0.80, 1.07)**

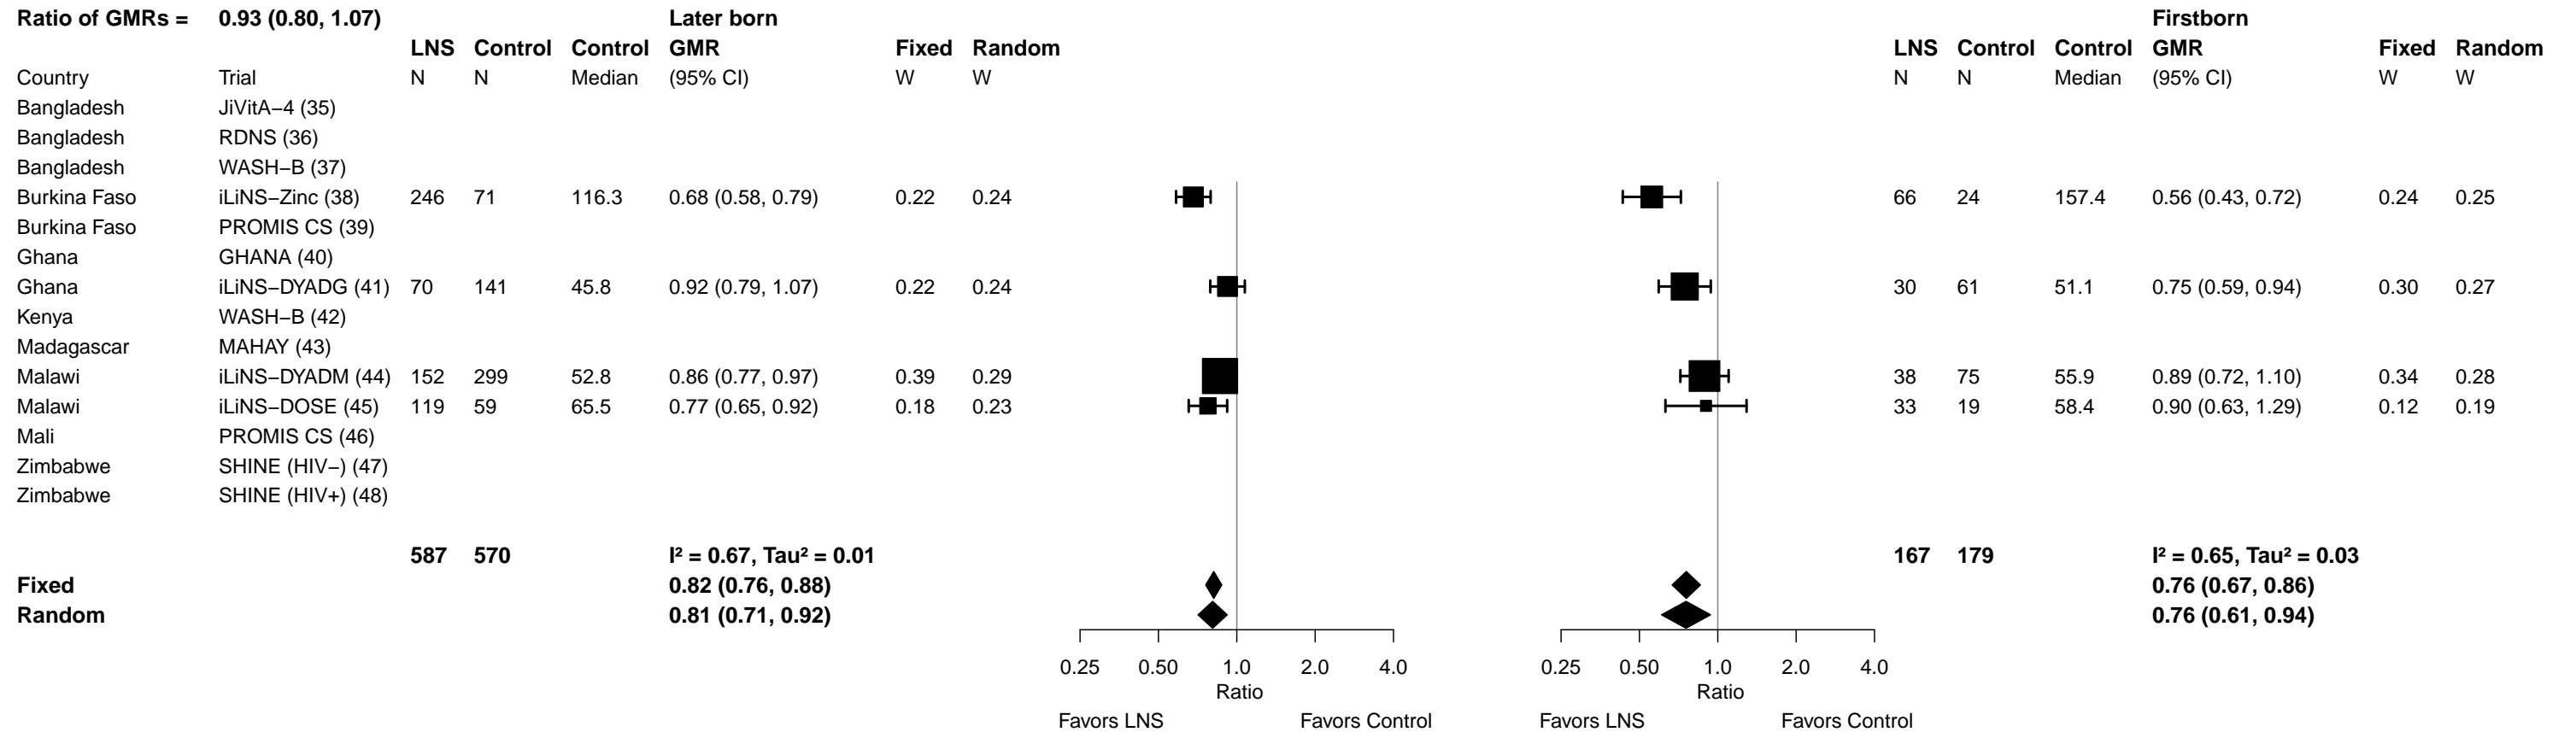

Supplemental figure 6N: Geometric mean ratio of zinc protoporphyrin concentration

6N6: Stratified by Child baseline acute malnutrition

**P-for-interaction = 0.817**  
**Ratio of GMRs = 0.98 (0.82, 1.16)**

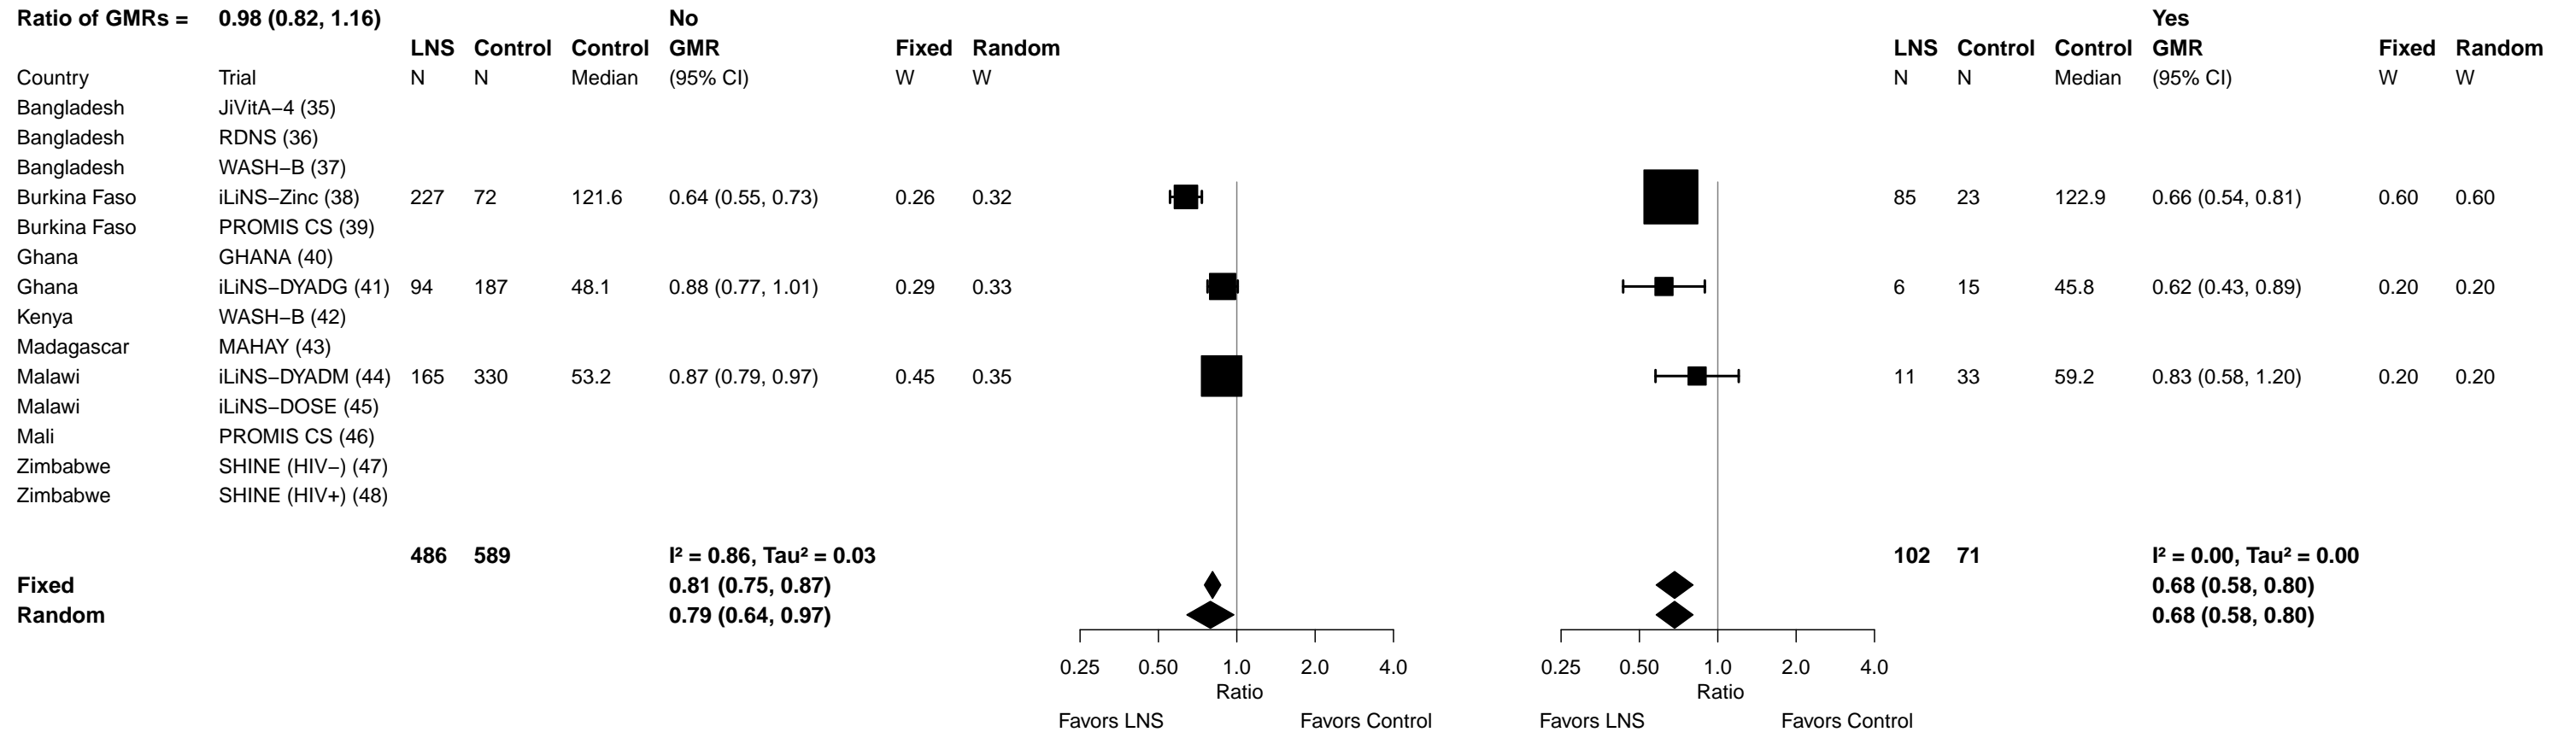



Supplemental figure 6N: Geometric mean ratio of zinc protoporphyrin concentration

6N7: Stratified by Child baseline anemia

**P-for-interaction = 0.243**  
**Ratio of GMRs = 1.09 (0.95, 1.25)**

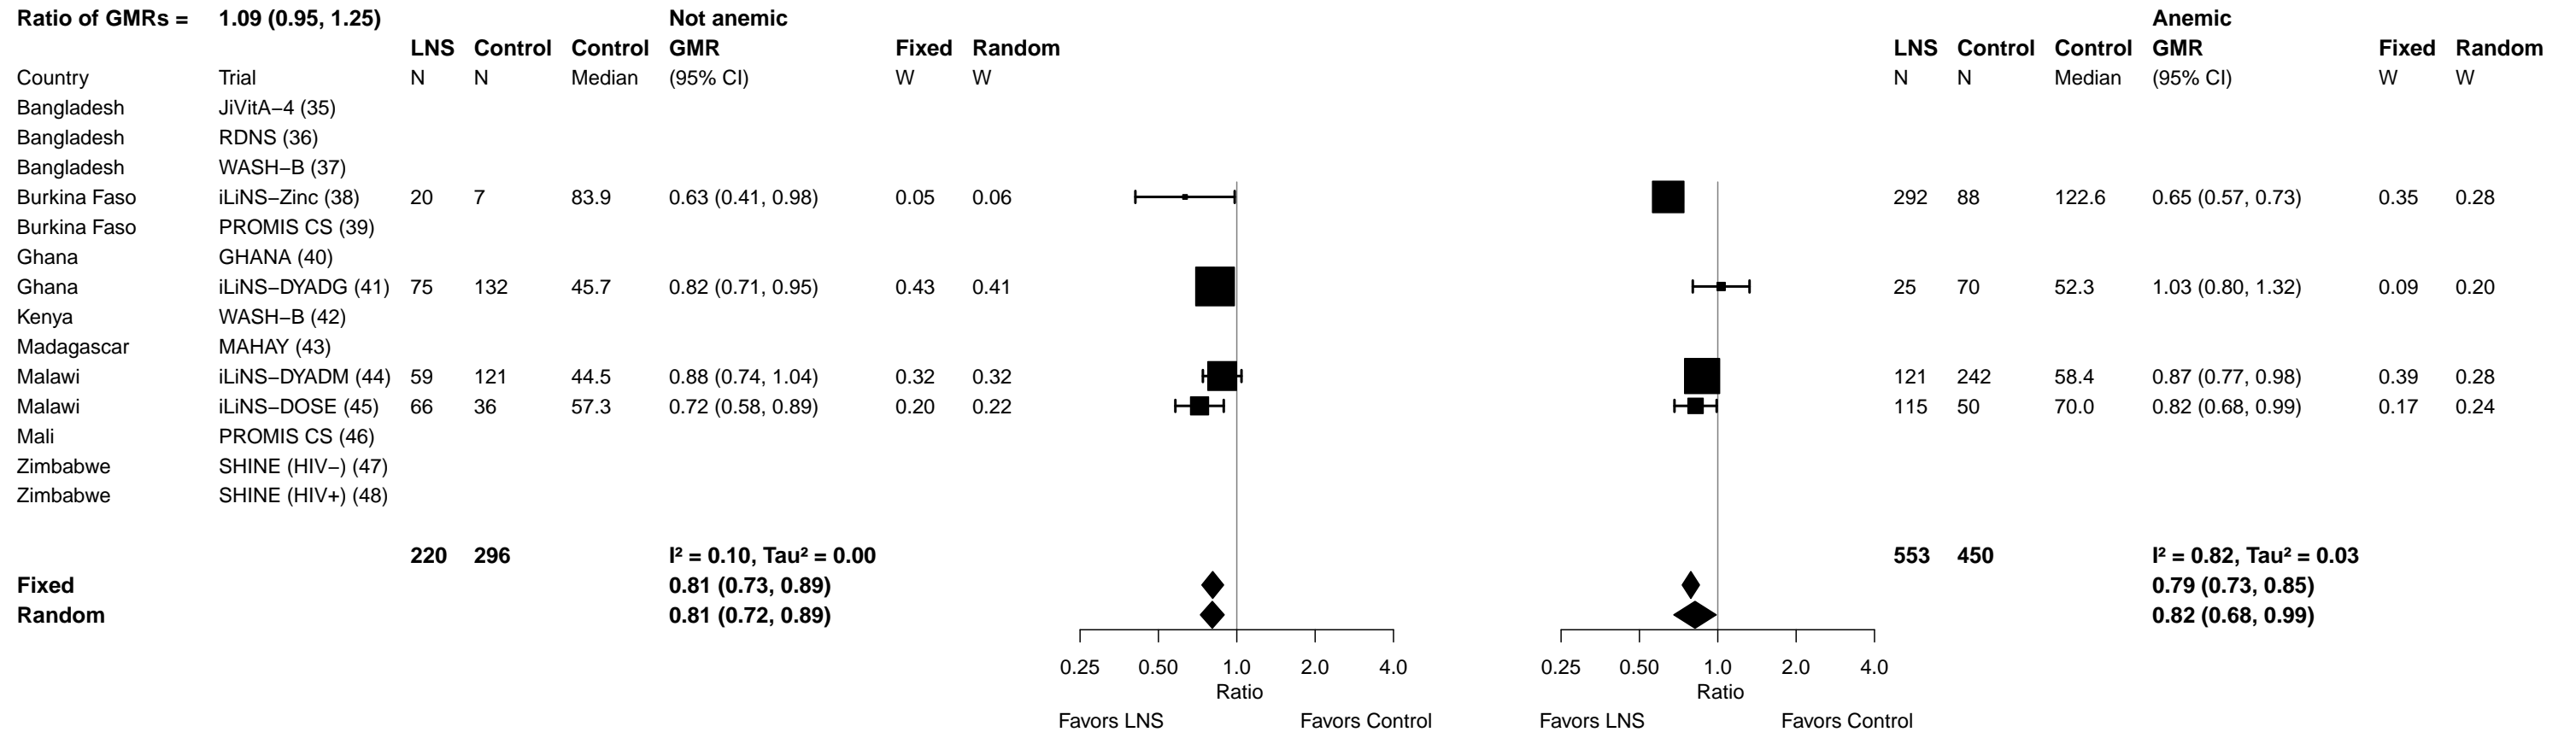

**Supplemental figure 6N: Geometric mean ratio of zinc protoporphyrin concentration**

**6N8: Stratified by Child high-dose vitamin A supplementation (insufficient comparisons)**

Supplemental figure 6N: Geometric mean ratio of zinc protoporphyrin concentration

6N9: Stratified by Child inflammation

**P-for-interaction = 0.777**  
**Ratio of GMRs = 0.98 (0.86, 1.11)**

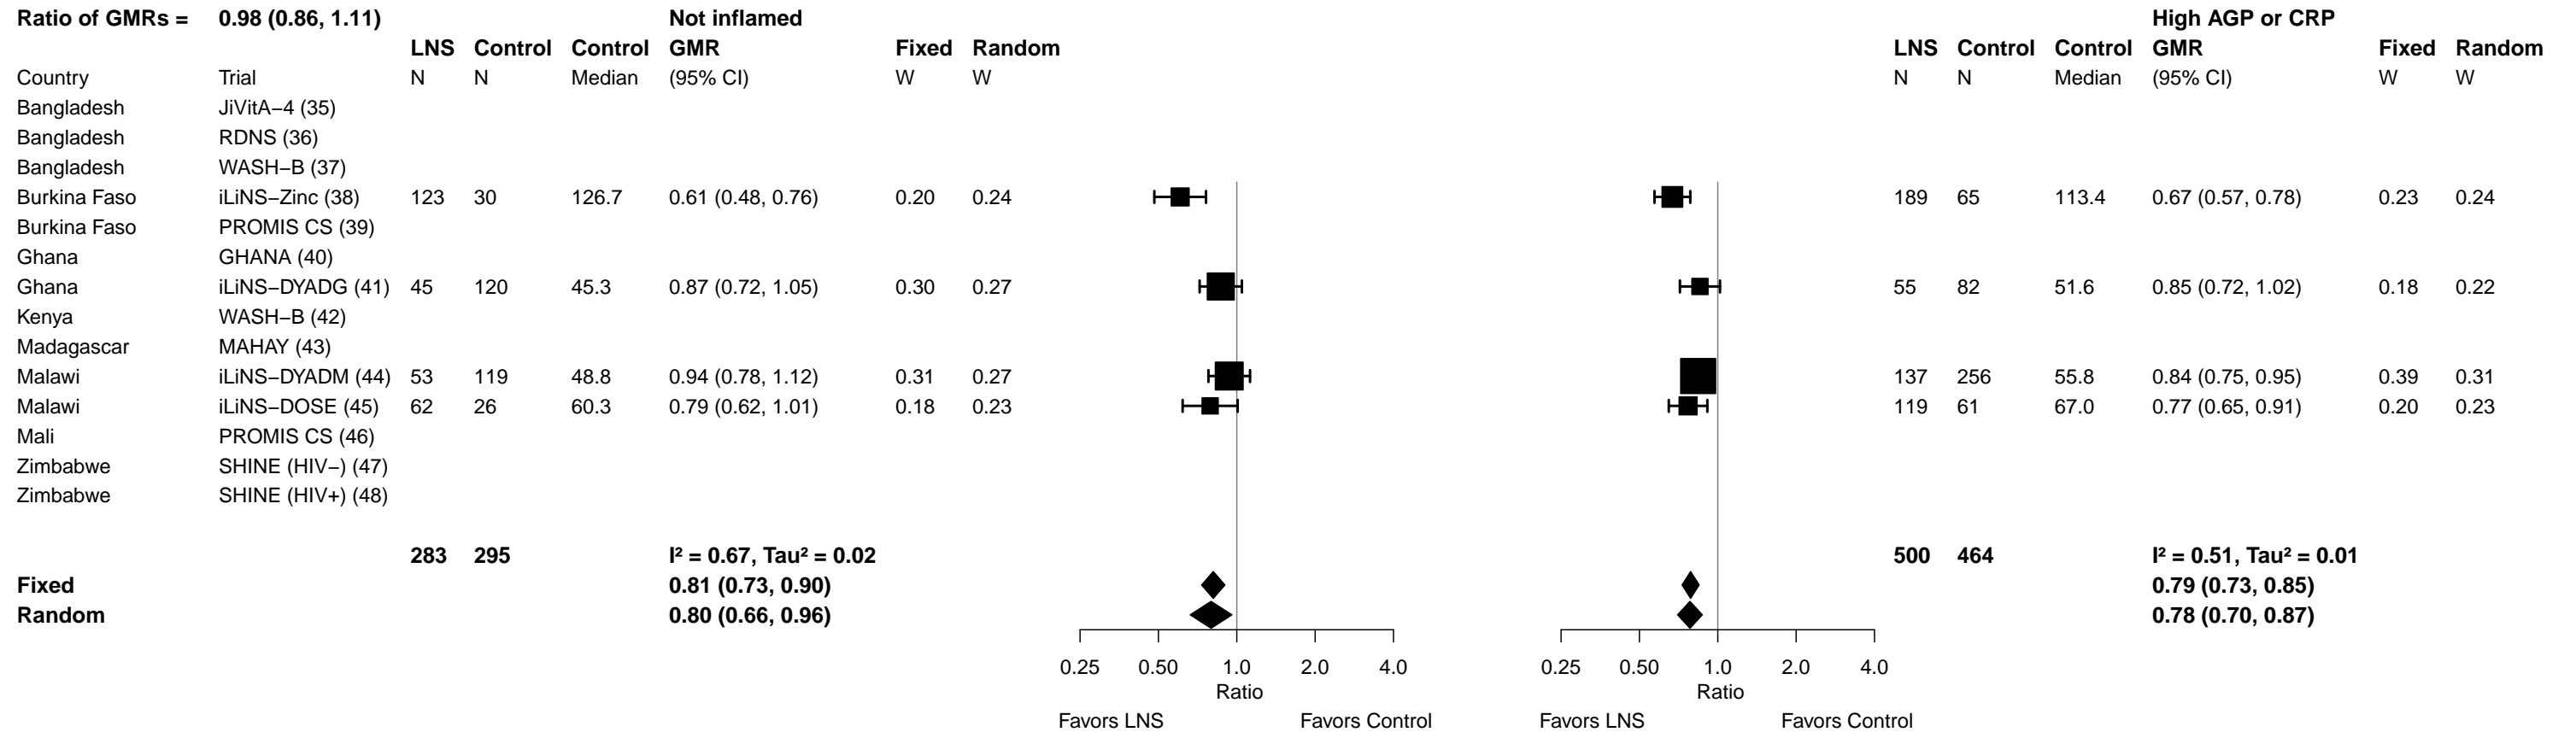

### Supplemental figure 6O: Elevated zinc protoporphyrin prevalence ratio

#### 6O1: Stratified by Maternal BMI

**P-for-interaction = 0.942**

**Ratio of PRs = 1.01 (0.78, 1.30)**

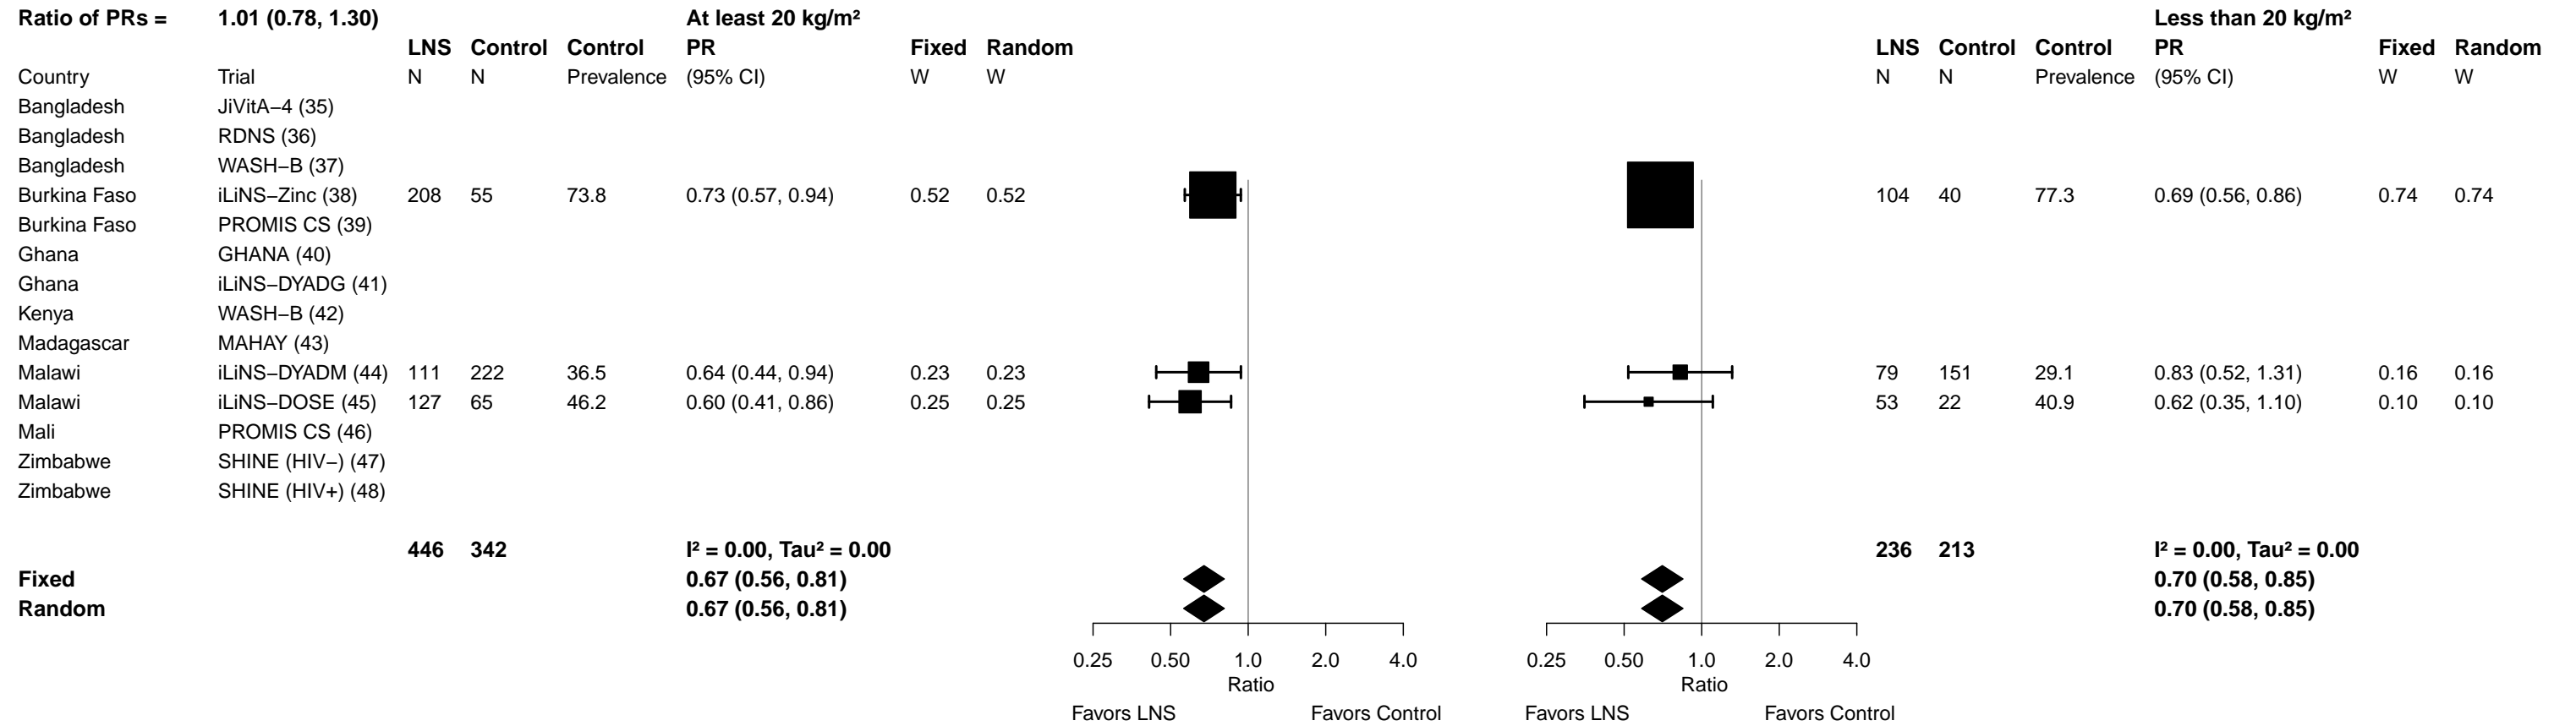

Supplemental figure 6O: Elevated zinc protoporphyrin prevalence ratio

6O2: Stratified by Maternal age

P-for-interaction = 0.660

Ratio of PRs = 1.07 (0.80, 1.43)

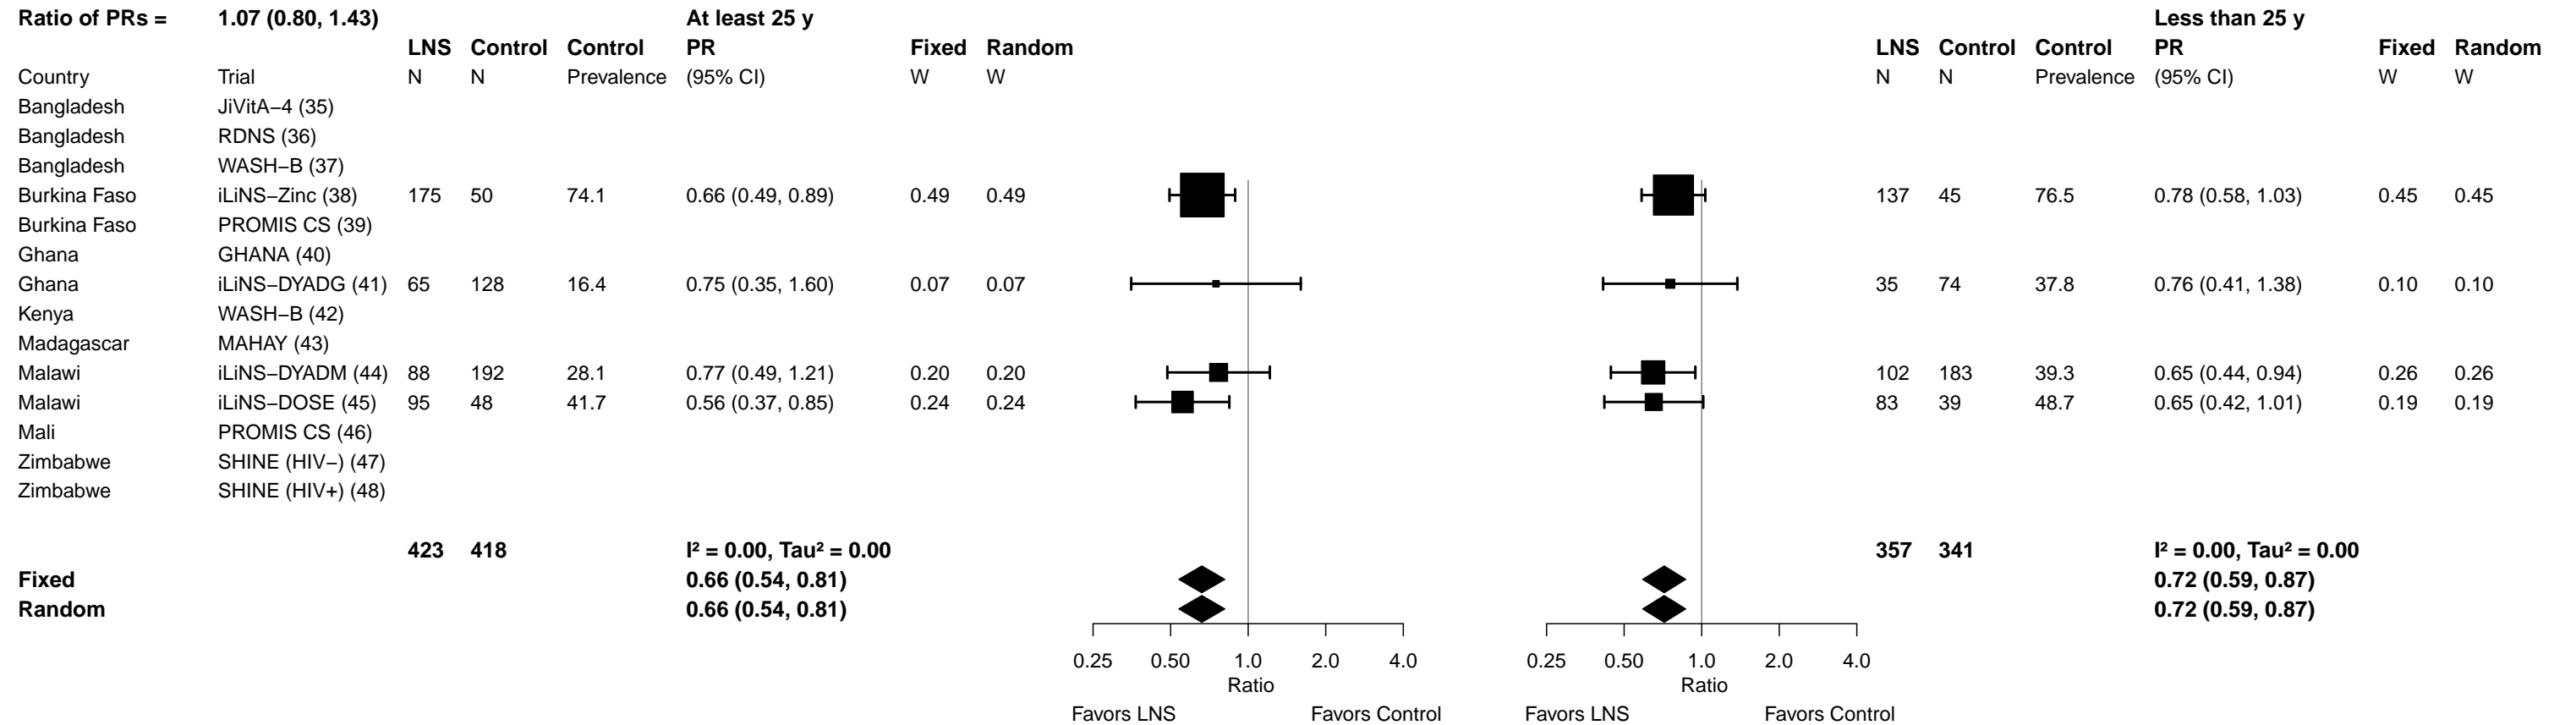

Supplemental figure 6O: Elevated zinc protoporphyrin prevalence ratio

6O3: Stratified by Maternal education

P-for-interaction = 0.114

Ratio of PRs = 1.42 (0.92, 2.20)

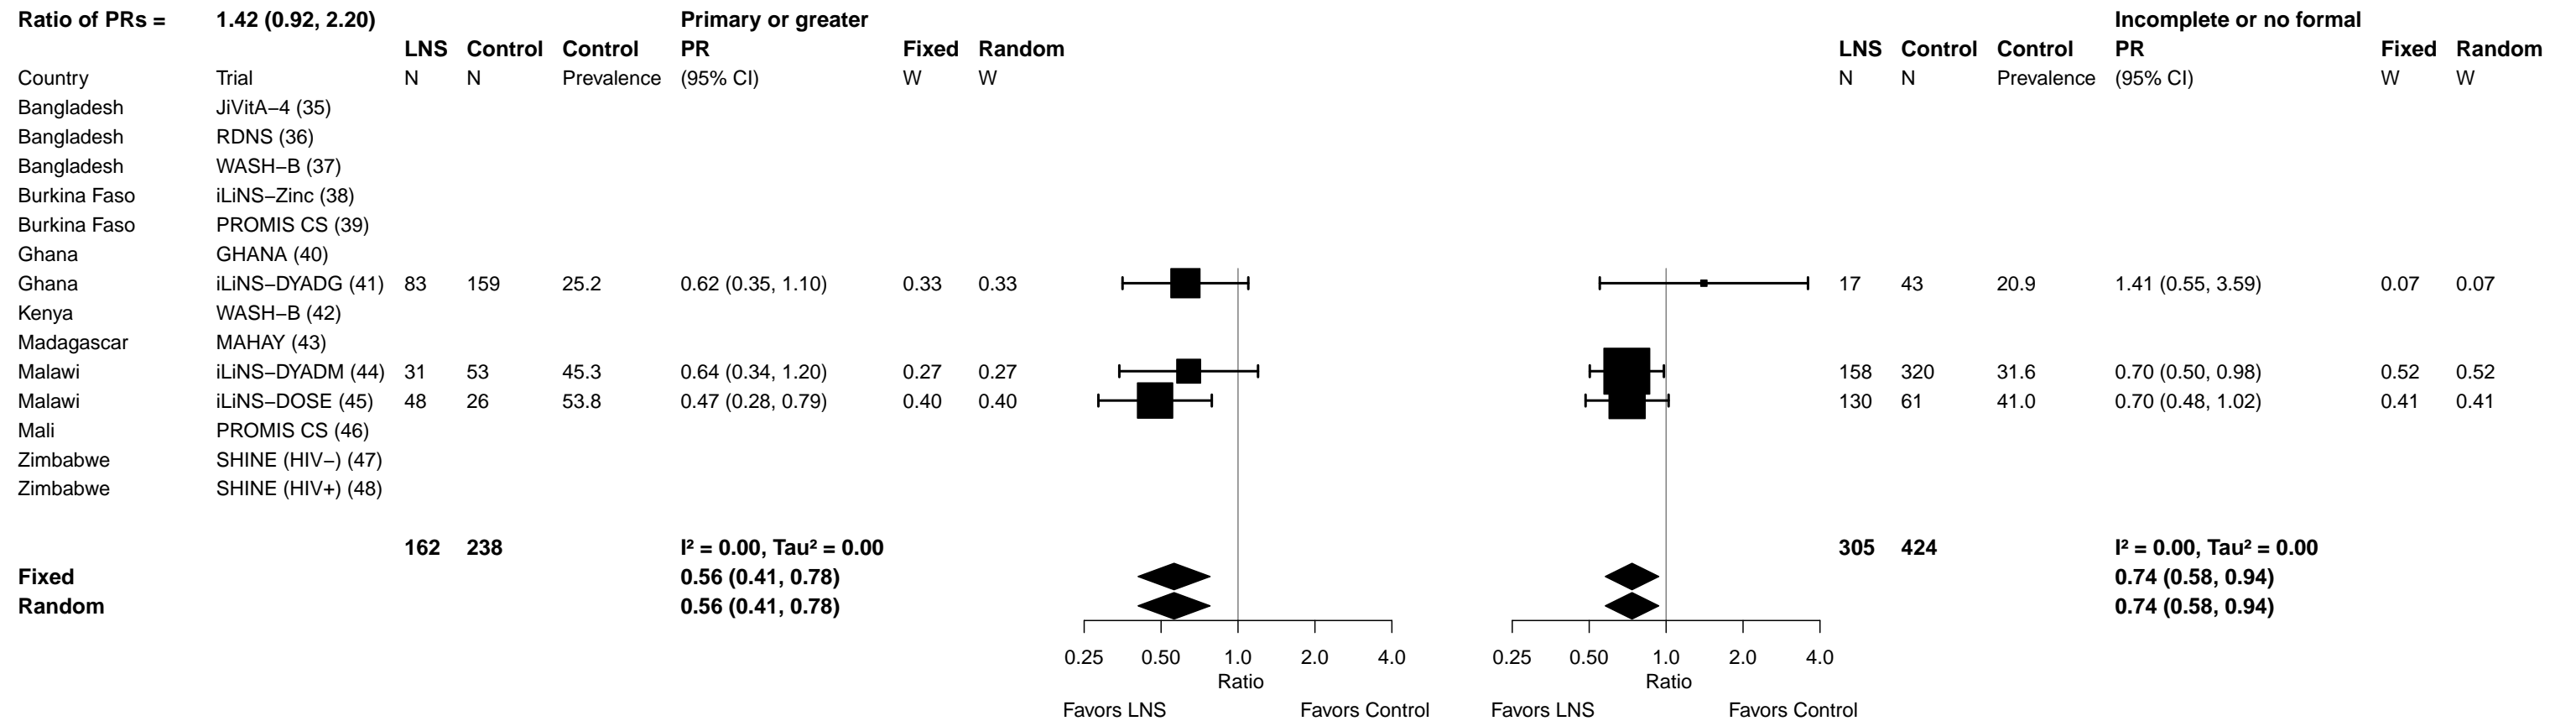



Supplemental figure 6O: Elevated zinc protoporphyrin prevalence ratio

6O5: Stratified by Child birth order

**P-for-interaction = 0.123**  
**Ratio of PRs = 1.21 (0.95, 1.53)**

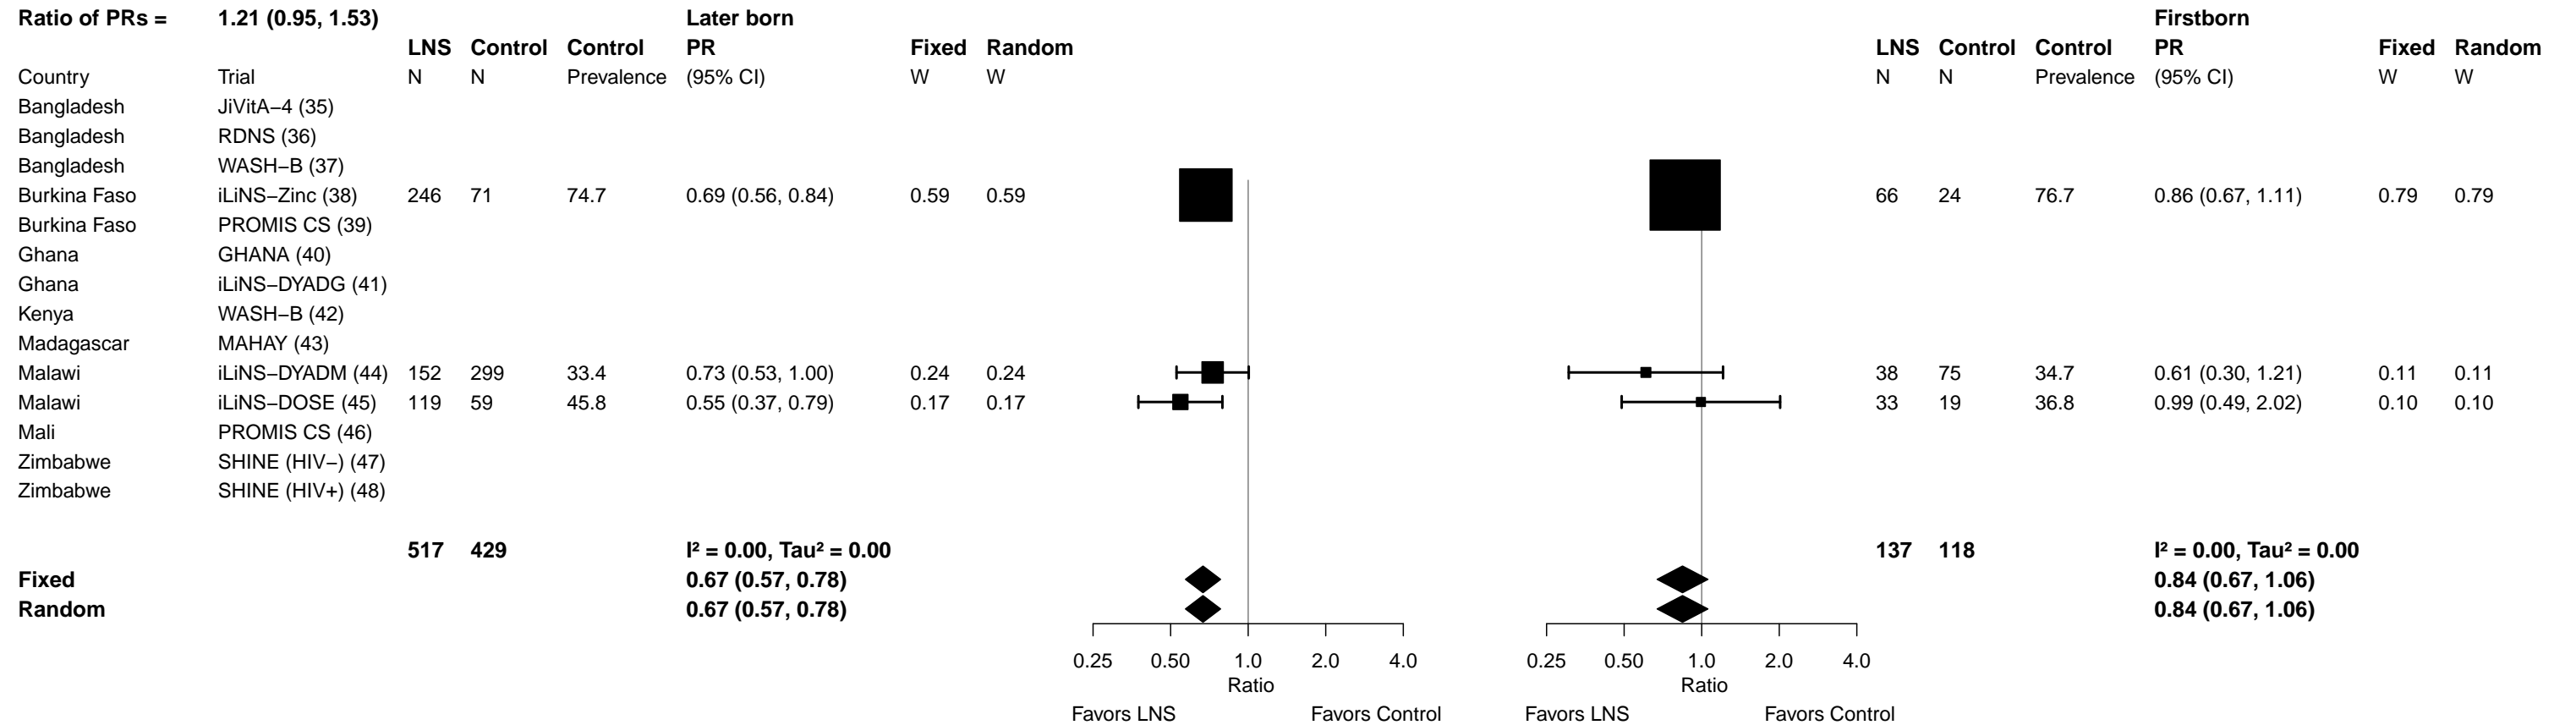



**Supplemental figure 6O: Elevated zinc protoporphyrin prevalence ratio**

**6O6: Stratified by Child baseline acute malnutrition (insufficient comparisons)**

Supplemental figure 6O: Elevated zinc protoporphyrin prevalence ratio

6O7: Stratified by Child baseline anemia

P-for-interaction = 0.305

Ratio of PRs = 1.26 (0.81, 1.94)

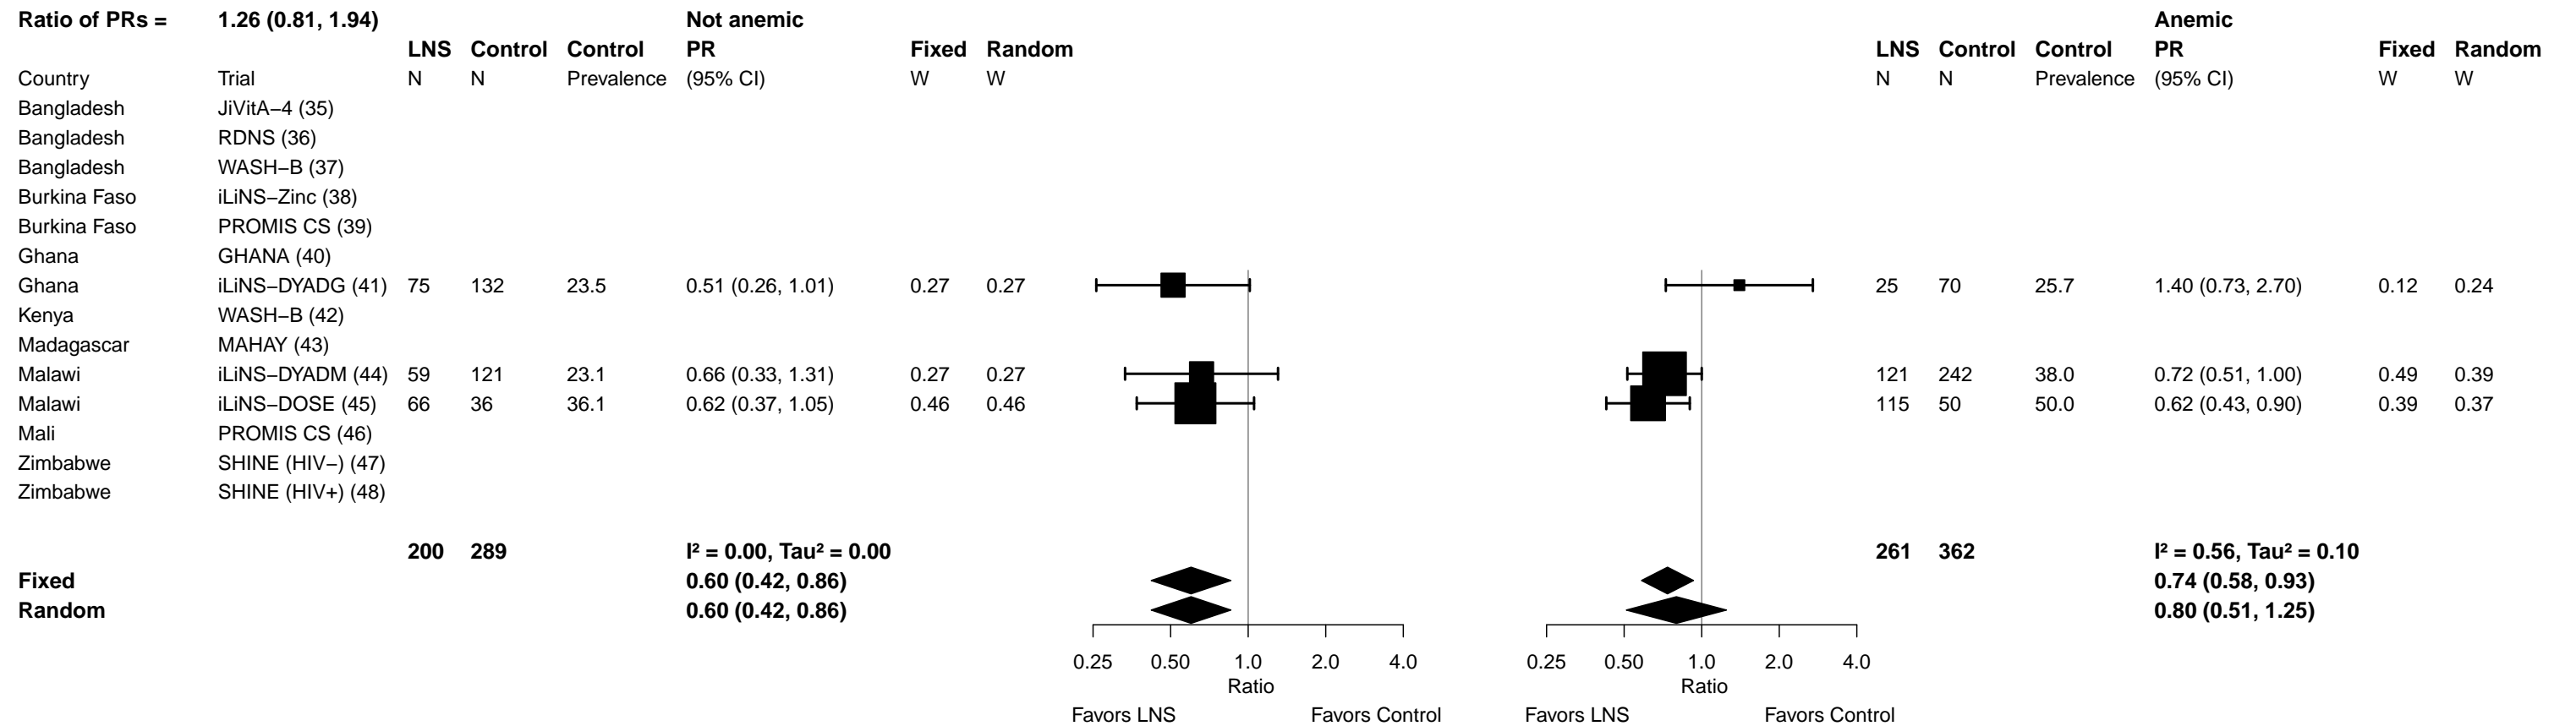

**Supplemental figure 6O: Elevated zinc protoporphyrin prevalence ratio**

**6O8: Stratified by Child high-dose vitamin A supplementation (insufficient comparisons)**

Supplemental figure 6O: Elevated zinc protoporphyrin prevalence ratio

6O9: Stratified by Child inflammation

P-for-interaction = 0.980

Ratio of PRs = 1.00 (0.76, 1.30)

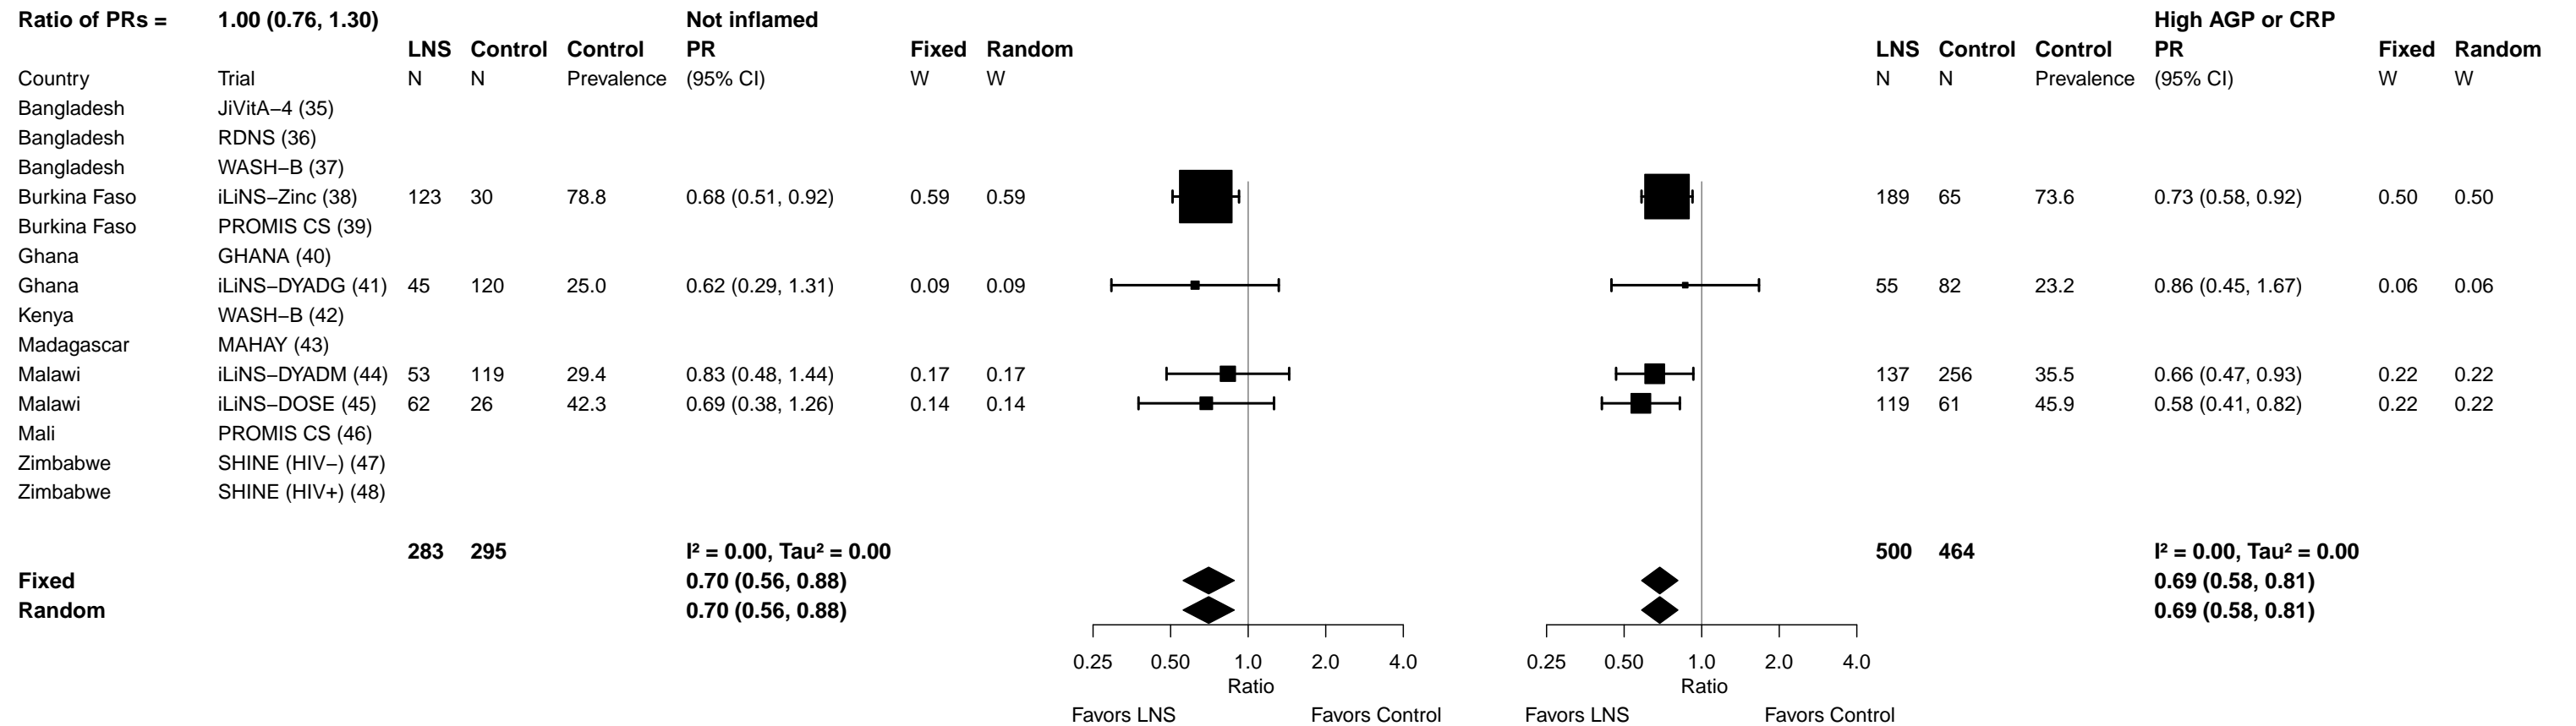

### Supplemental figure 6P: Elevated zinc protoporphyrin prevalence difference

#### 6P1: Stratified by Maternal BMI

P-for-interaction = 0.612

Difference in PDs = 0.03 (-0.08, 0.14)

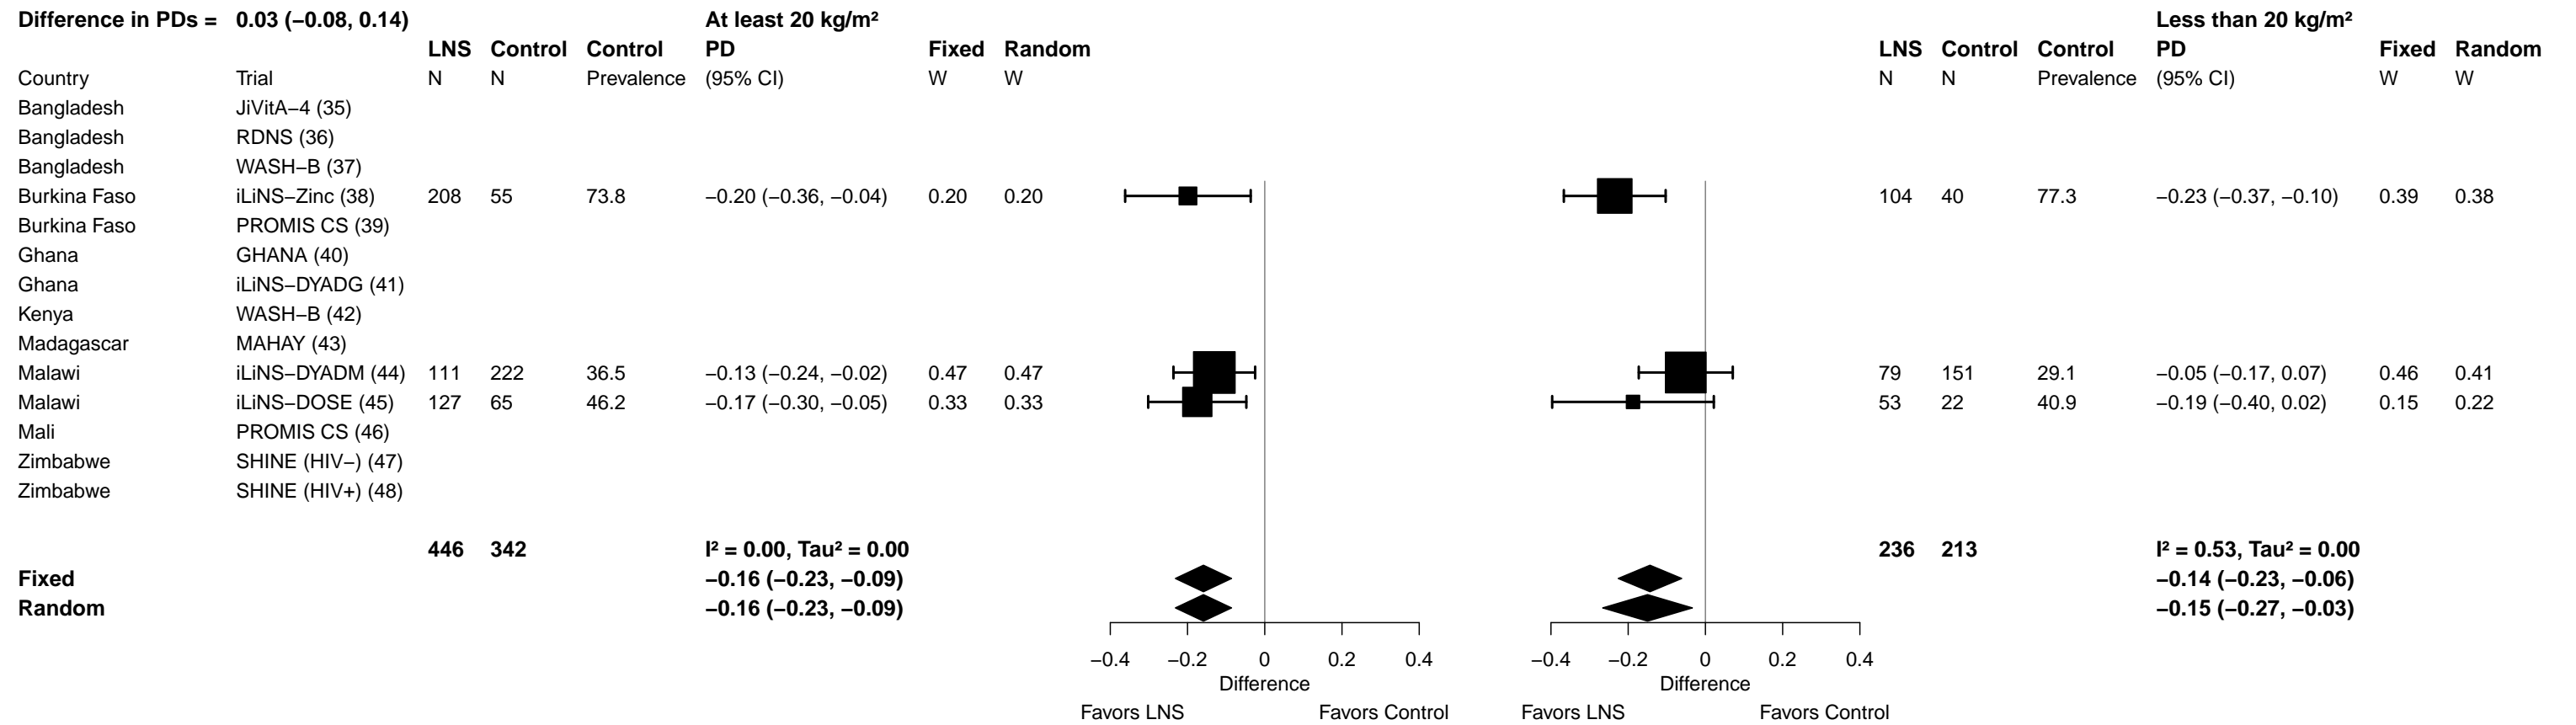



Supplemental figure 6P: Elevated zinc protoporphyrin prevalence difference

6P3: Stratified by Maternal education

P-for-interaction = 0.080

Difference in PDs = 0.13 (-0.02, 0.27)

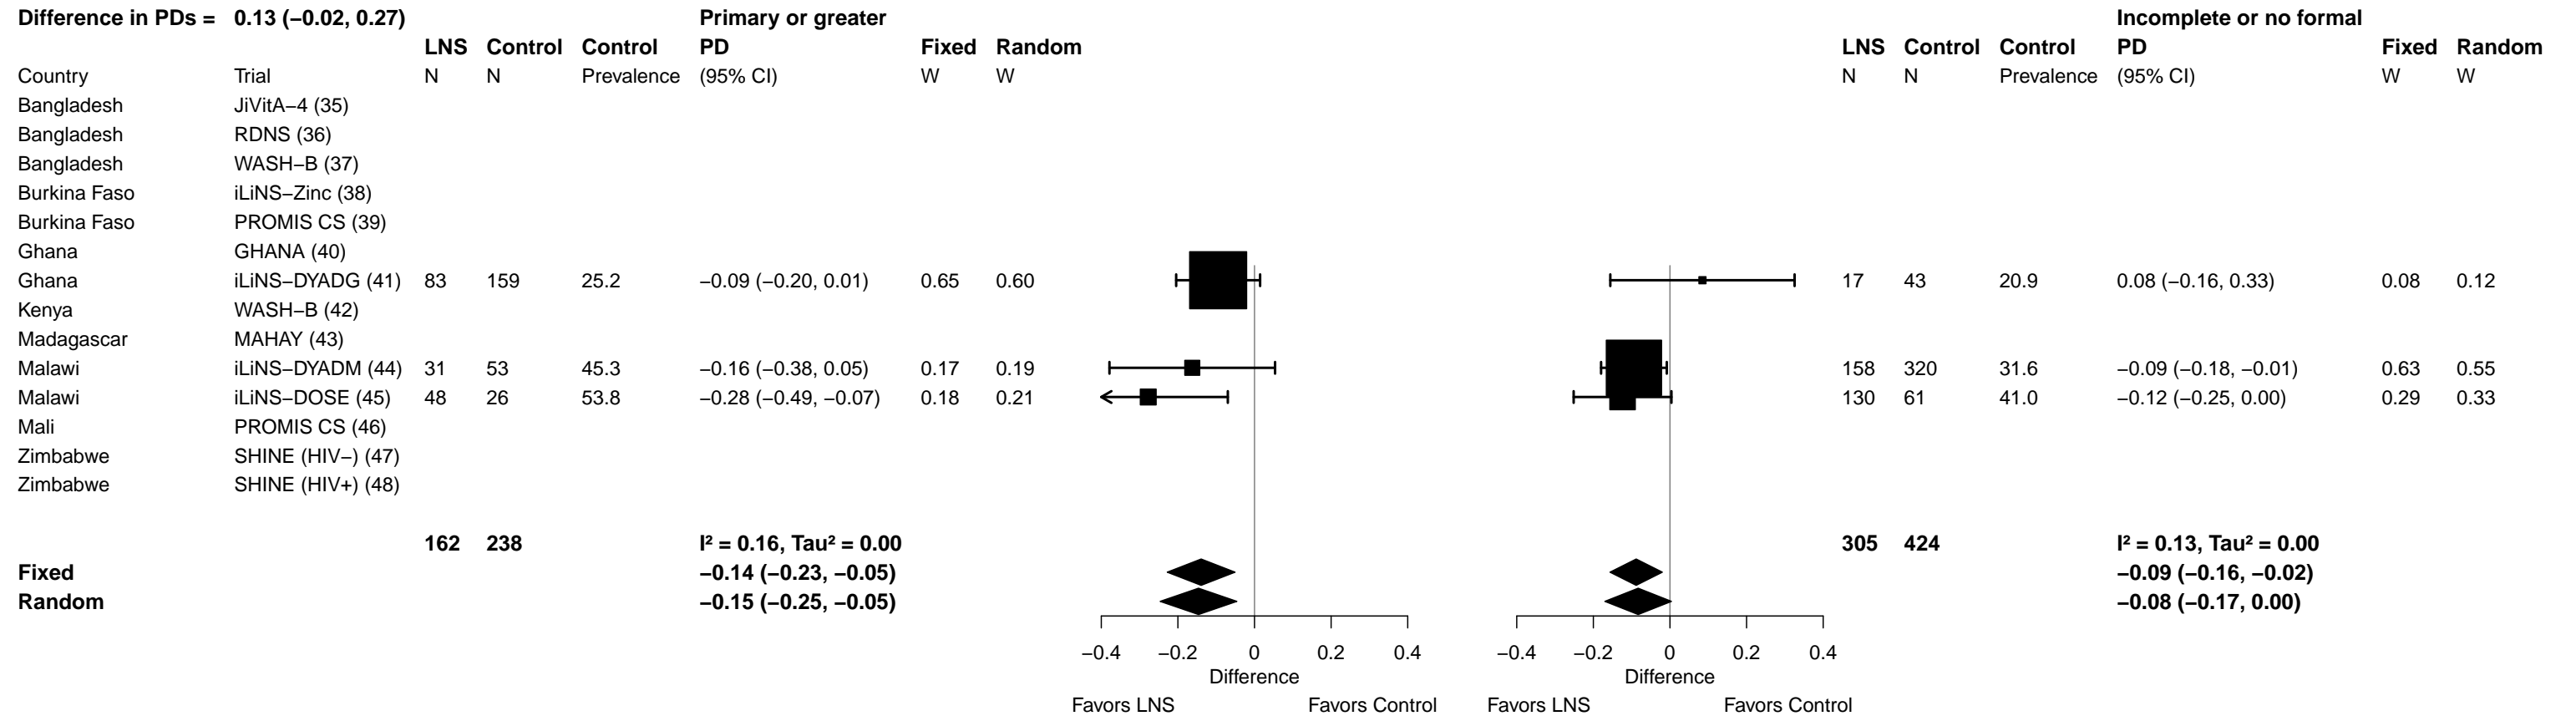

Supplemental figure 6P: Elevated zinc protoporphyrin prevalence difference

6P4: Stratified by Child sex

**P-for-interaction = 0.276**  
**Difference in PDs = 0.05 (-0.04, 0.15)**

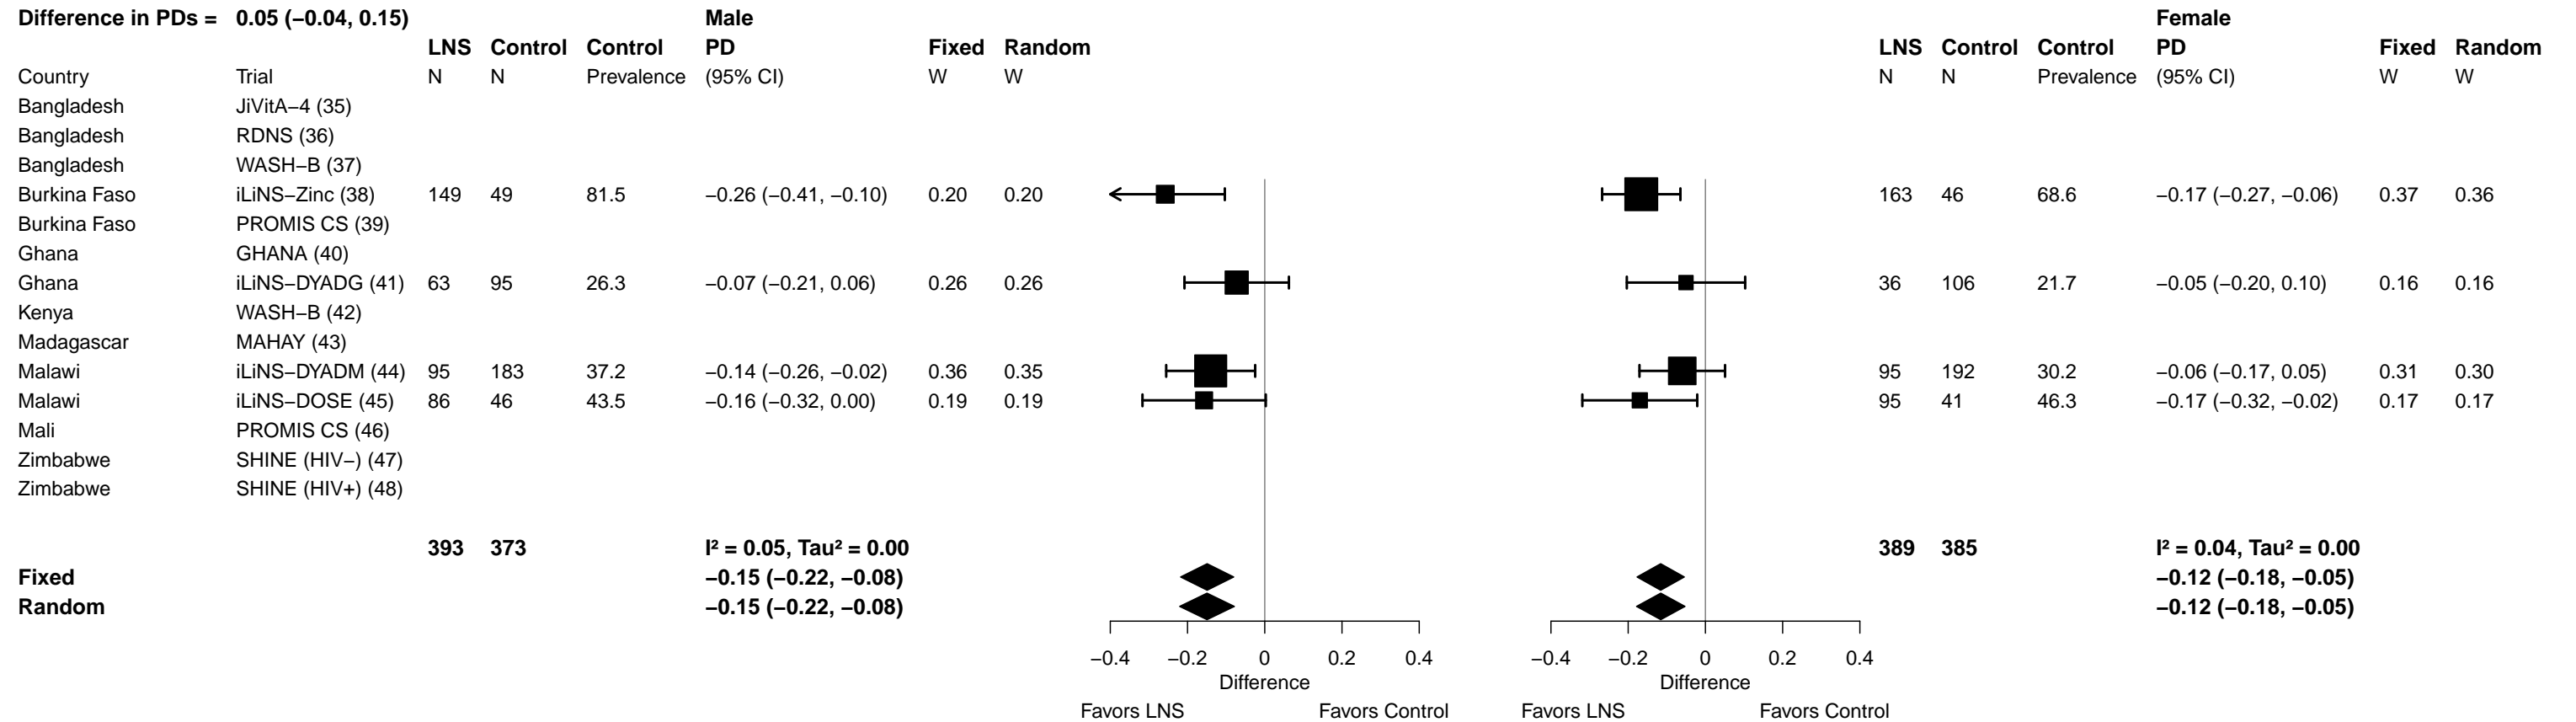



Supplemental figure 6P: Elevated zinc protoporphyrin prevalence difference

6P5: Stratified by Child birth order

P-for-interaction = 0.462

Difference in PDs = 0.05 (-0.08, 0.18)

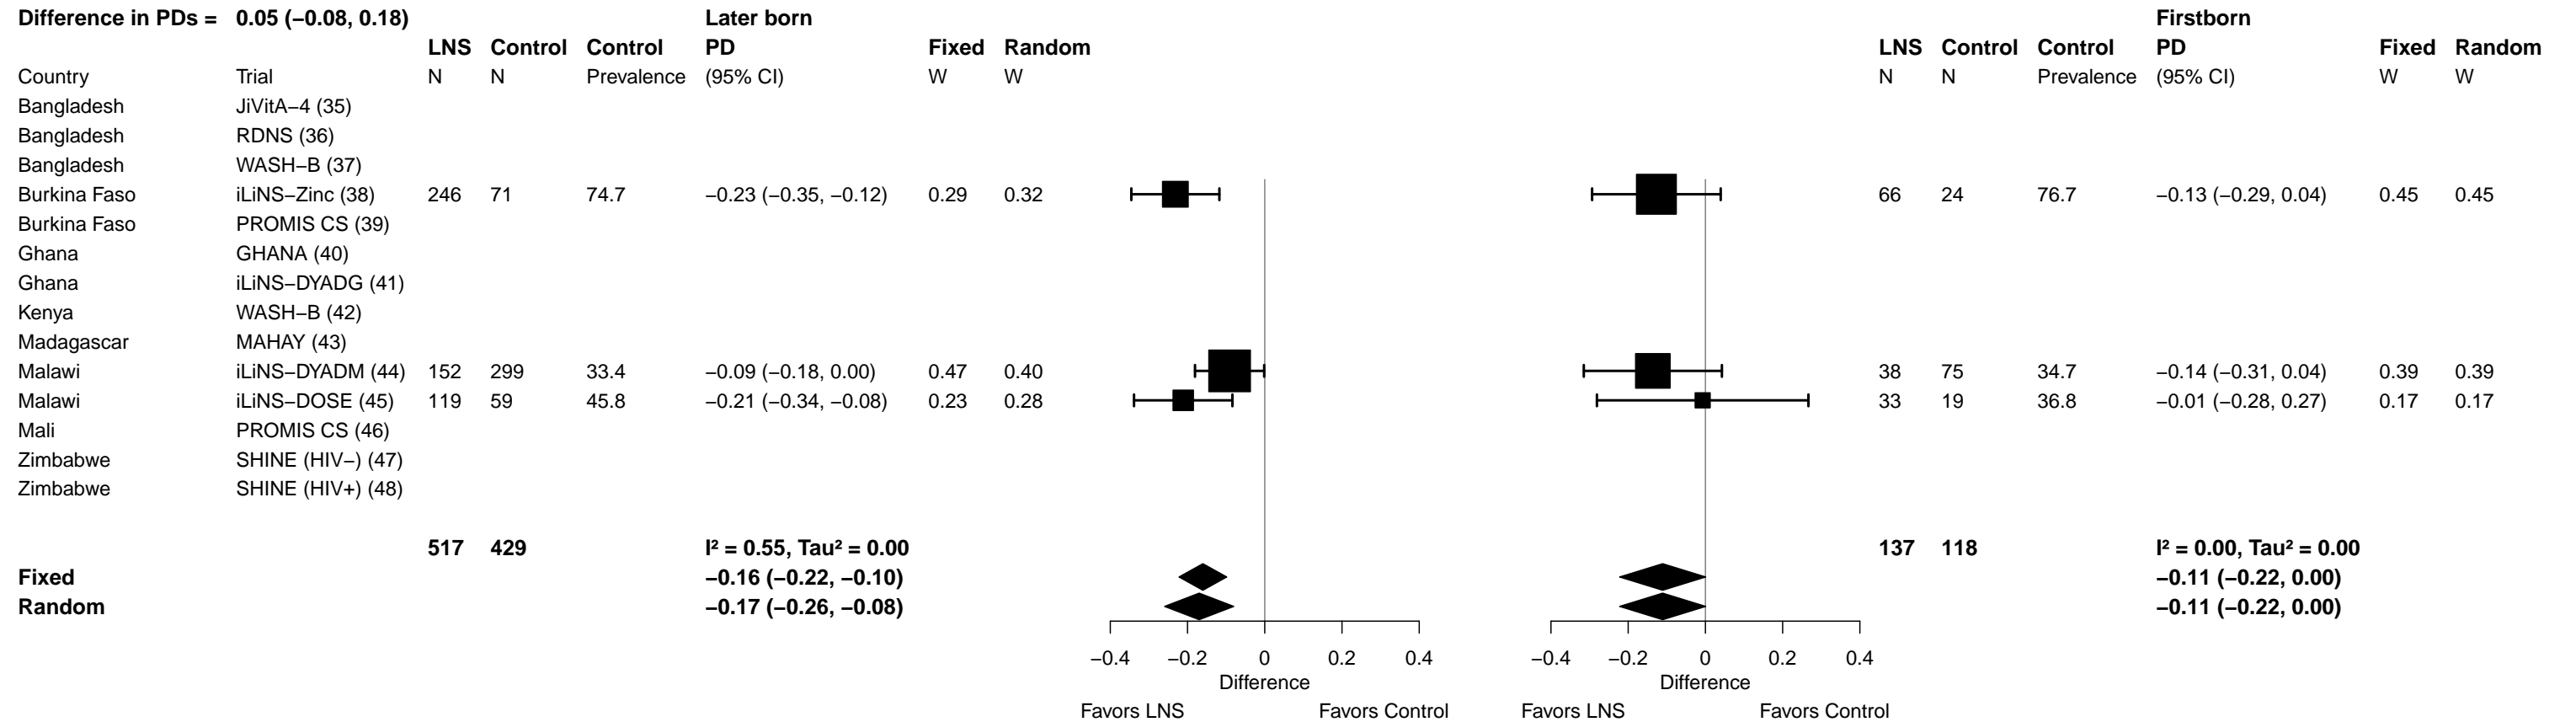

**Supplemental figure 6P: Elevated zinc protoporphyrin prevalence difference**

**6P6: Stratified by Child baseline acute malnutrition (insufficient comparisons)**

Supplemental figure 6P: Elevated zinc protoporphyrin prevalence difference

6P7: Stratified by Child baseline anemia

P-for-interaction = 0.663

Difference in PDs = 0.03 (-0.09, 0.14)

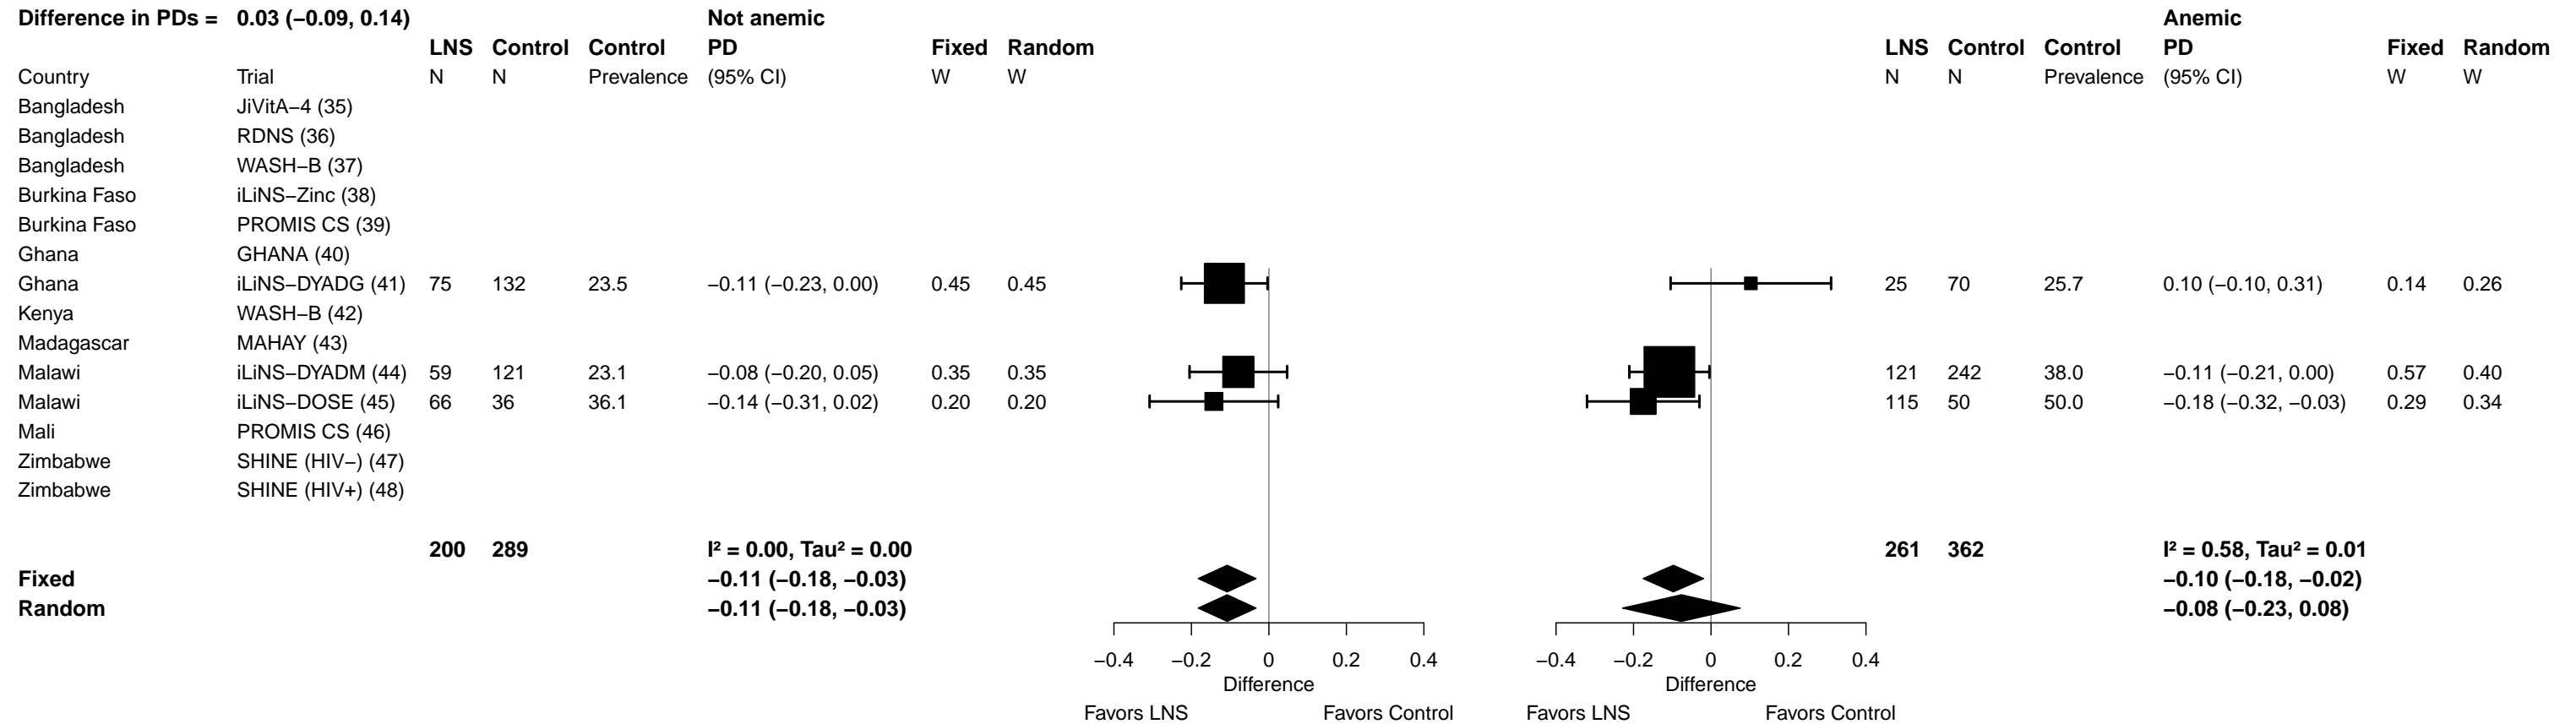

**Supplemental figure 6P: Elevated zinc protoporphyrin prevalence difference**

**6P8: Stratified by Child high-dose vitamin A supplementation (insufficient comparisons)**



**Supplemental figure 6Q: Geometric mean ratio of plasma zinc concentration**

6Q1: Stratified by Maternal BMI (insufficient comparisons)

Supplemental figure 6Q: Geometric mean ratio of plasma zinc concentration

6Q2: Stratified by Maternal age

**P-for-interaction = 0.003**  
**Ratio of GMRs = 0.94 (0.90, 0.98)**

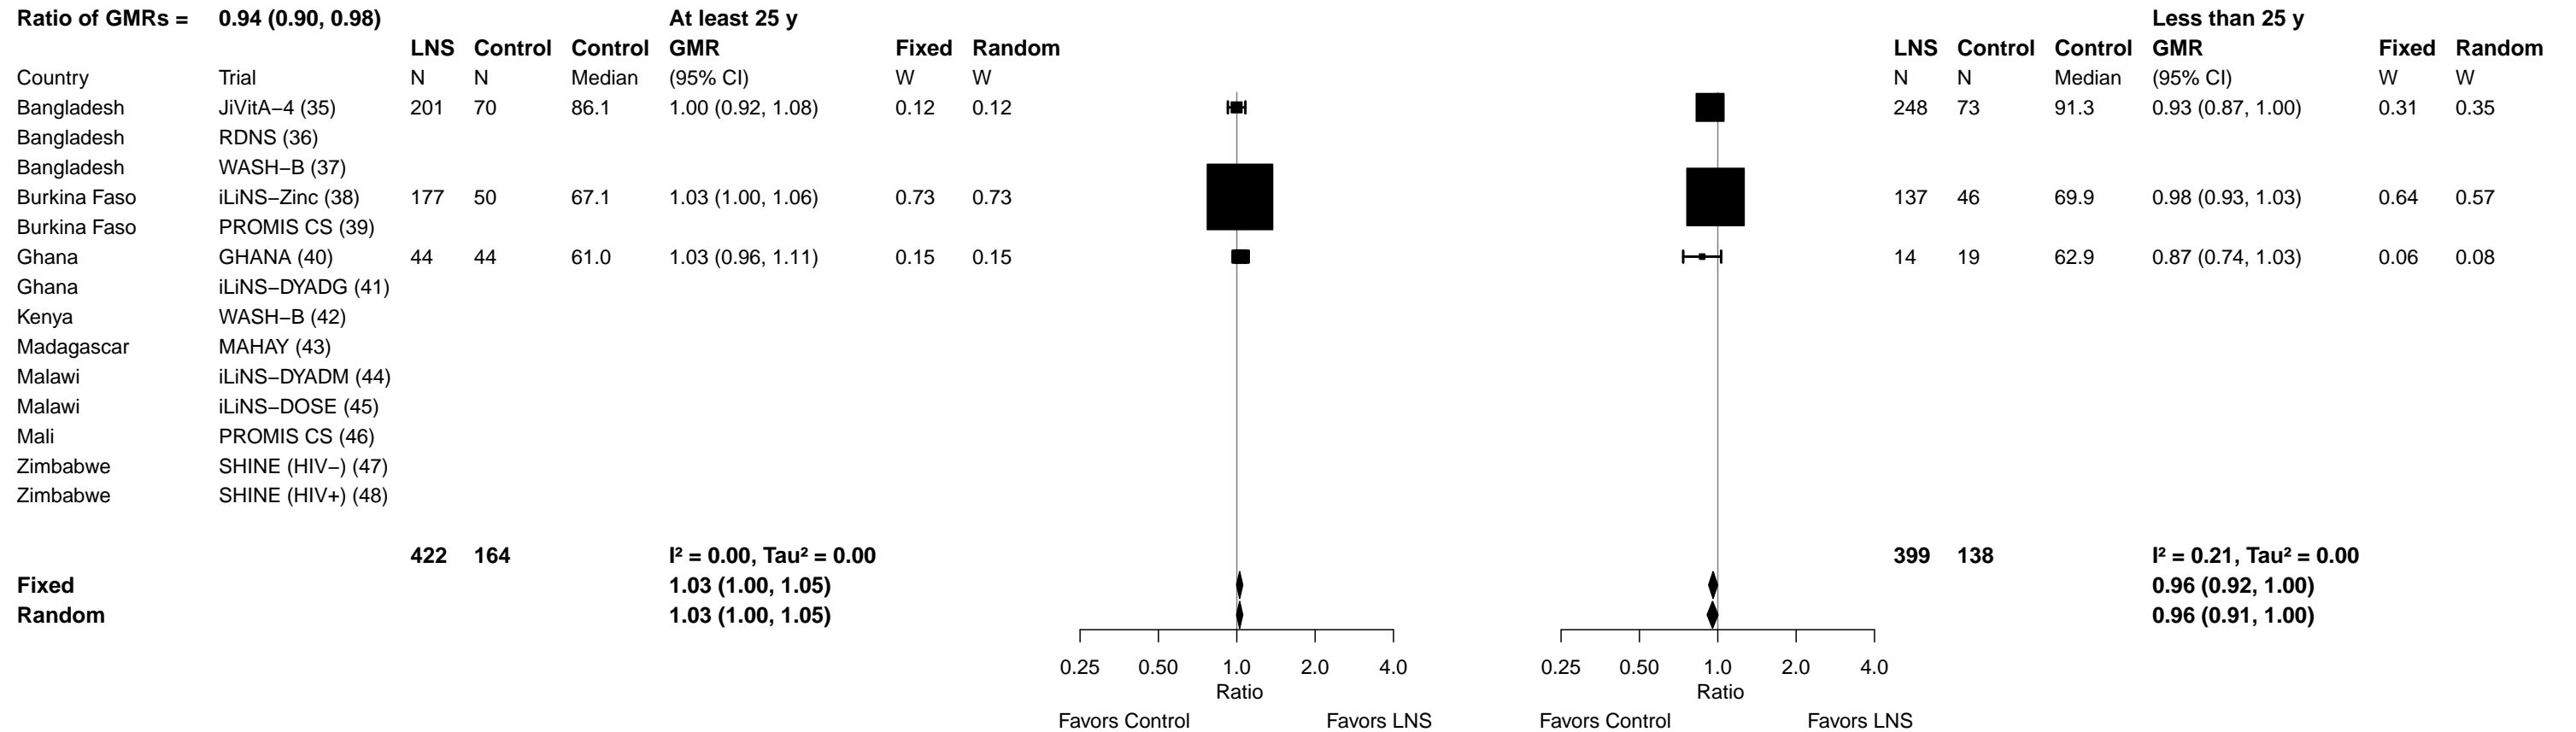

**Supplemental figure 6Q: Geometric mean ratio of plasma zinc concentration**

**6Q3: Stratified by Maternal education (insufficient comparisons)**



Supplemental figure 6Q: Geometric mean ratio of plasma zinc concentration

6Q4: Stratified by Child sex

**P-for-interaction = 0.728**  
**Ratio of GMRs = 1.01 (0.96, 1.06)**

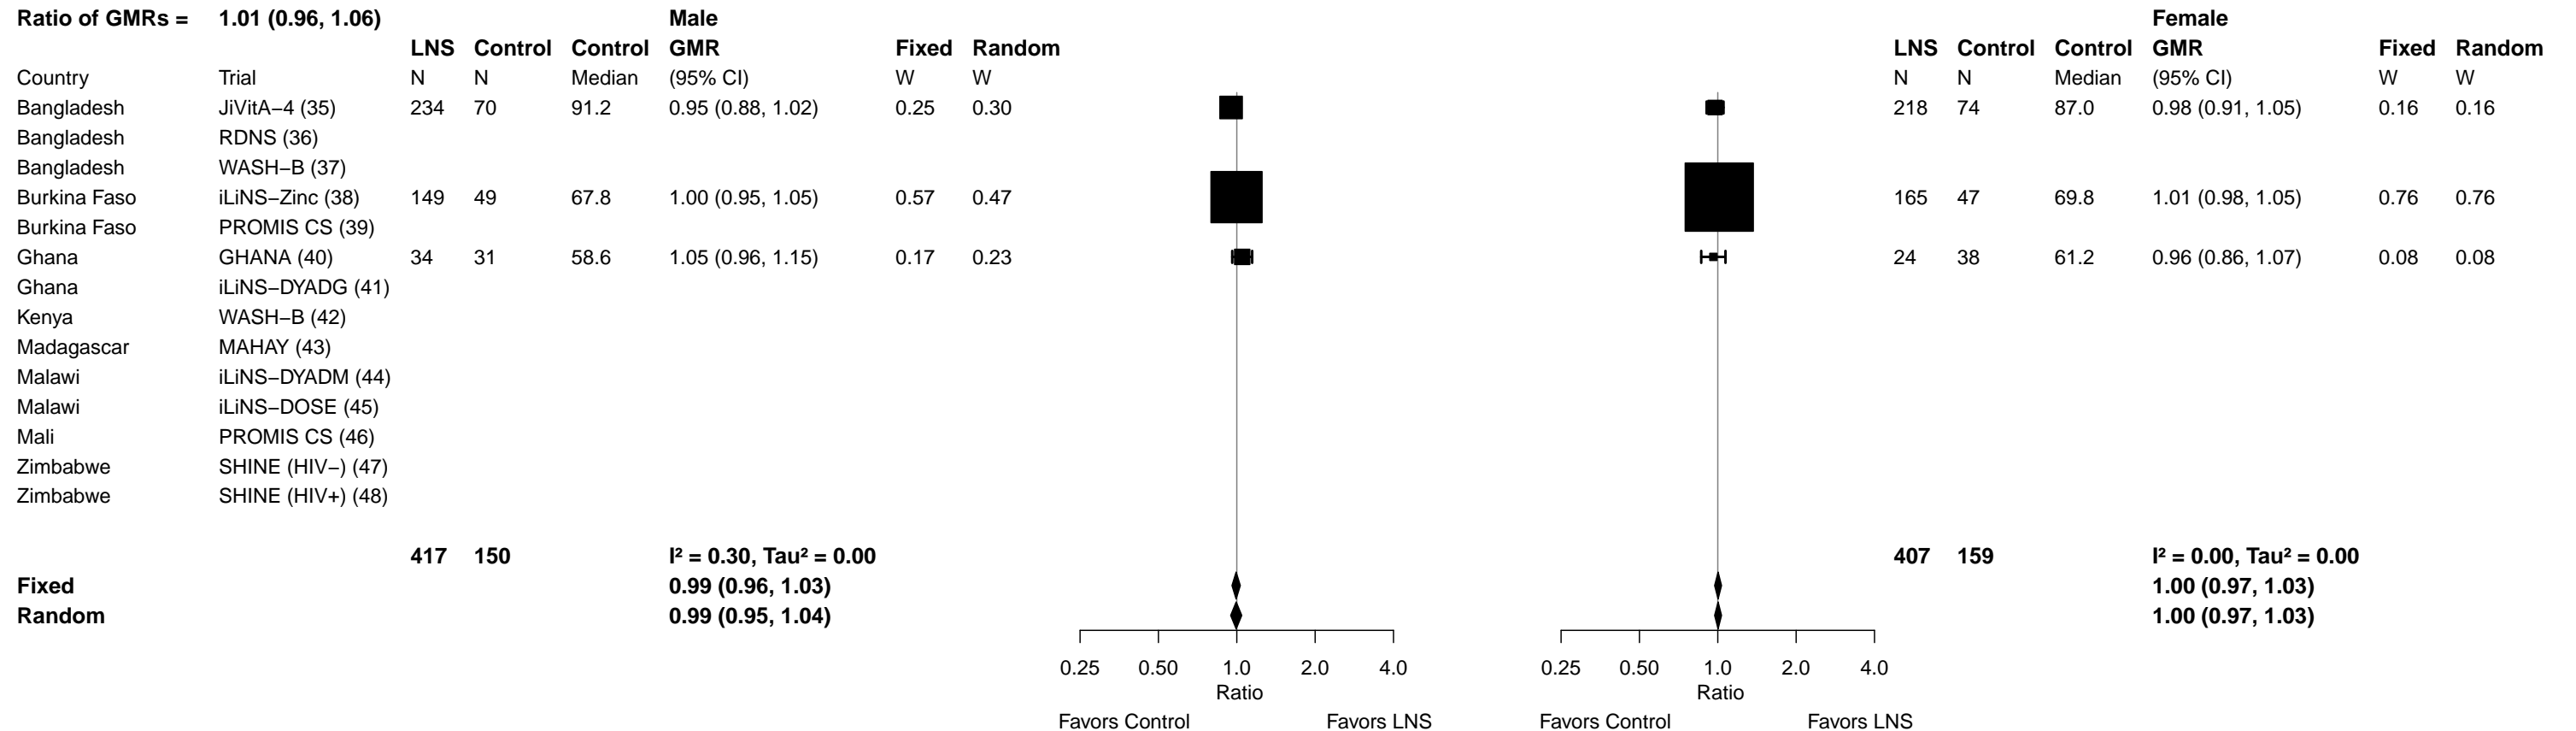

Supplemental figure 6Q: Geometric mean ratio of plasma zinc concentration

6Q5: Stratified by Child birth order

**P-for-interaction = 0.131**  
**Ratio of GMRs = 0.96 (0.91, 1.01)**

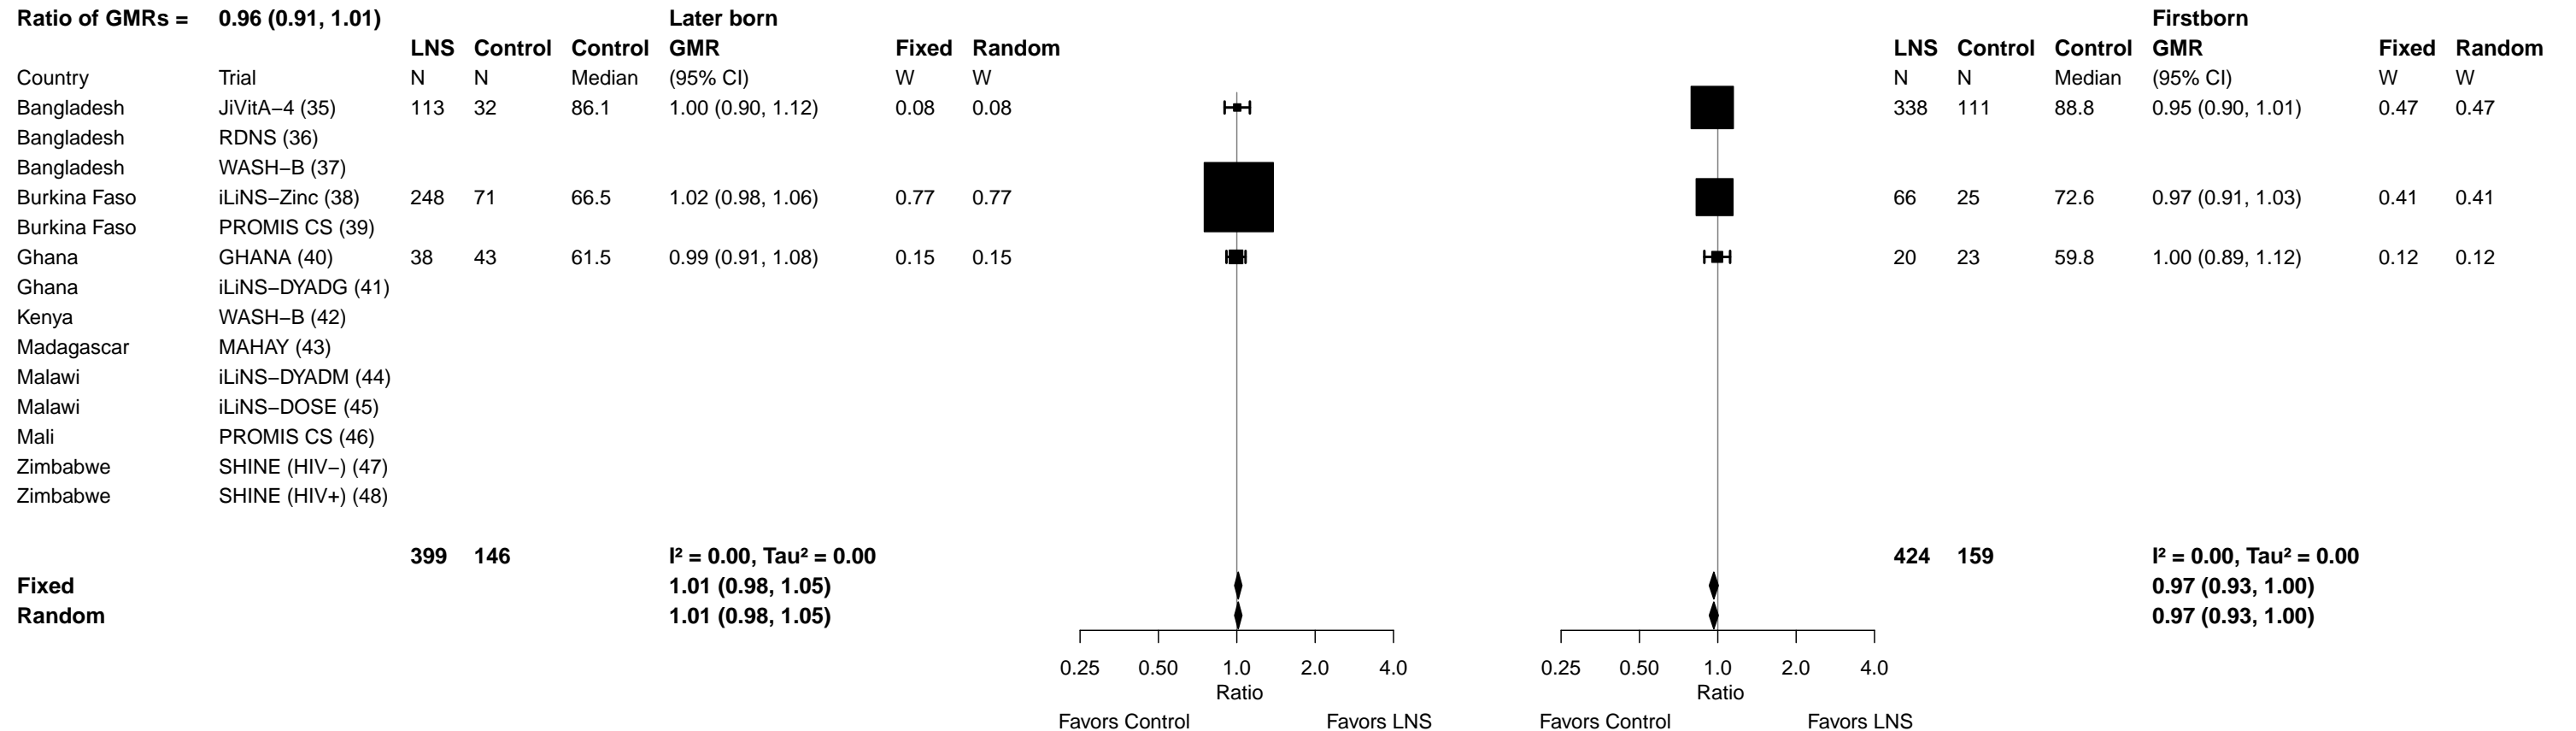

**Supplemental figure 6Q: Geometric mean ratio of plasma zinc concentration**

**6Q6: Stratified by Child baseline acute malnutrition (insufficient comparisons)**

**Supplemental figure 6Q: Geometric mean ratio of plasma zinc concentration**

**6Q7: Stratified by Child baseline anemia (insufficient comparisons)**

**Supplemental figure 6Q: Geometric mean ratio of plasma zinc concentration**

**6Q8: Stratified by Child high-dose vitamin A supplementation (insufficient comparisons)**

Supplemental figure 6Q: Geometric mean ratio of plasma zinc concentration

6Q9: Stratified by Child inflammation

**P-for-interaction = 0.425**  
**Ratio of GMRs = 1.02 (0.97, 1.06)**

|              |                   |       |           | Not inflamed   |                   |         |          |
|--------------|-------------------|-------|-----------|----------------|-------------------|---------|----------|
| Country      | Trial             | LNS N | Control N | Control Median | GMR (95% CI)      | Fixed W | Random W |
| Bangladesh   | JiVitA-4 (35)     | 184   | 46        | 88.8           | 0.95 (0.89, 1.01) | 0.24    | 0.26     |
| Bangladesh   | RDNS (36)         |       |           |                |                   |         |          |
| Bangladesh   | WASH-B (37)       |       |           |                |                   |         |          |
| Burkina Faso | iLiNS-Zinc (38)   | 124   | 31        | 68.5           | 0.99 (0.94, 1.03) | 0.58    | 0.54     |
| Burkina Faso | PROMIS CS (39)    |       |           |                |                   |         |          |
| Ghana        | GHANA (40)        | 48    | 54        | 59.5           | 1.03 (0.95, 1.11) | 0.18    | 0.20     |
| Ghana        | iLiNS-DYADG (41)  |       |           |                |                   |         |          |
| Kenya        | WASH-B (42)       |       |           |                |                   |         |          |
| Madagascar   | MAHAY (43)        |       |           |                |                   |         |          |
| Malawi       | iLiNS-DYADM (44)  |       |           |                |                   |         |          |
| Malawi       | iLiNS-DOSE (45)   |       |           |                |                   |         |          |
| Mali         | PROMIS CS (46)    |       |           |                |                   |         |          |
| Zimbabwe     | SHINE (HIV-) (47) |       |           |                |                   |         |          |
| Zimbabwe     | SHINE (HIV+) (48) |       |           |                |                   |         |          |

**Fixed**  
**Random**

**356 131**

**I<sup>2</sup> = 0.12, Tau<sup>2</sup> = 0.00**  
**0.98 (0.95, 1.02)**  
**0.98 (0.95, 1.02)**

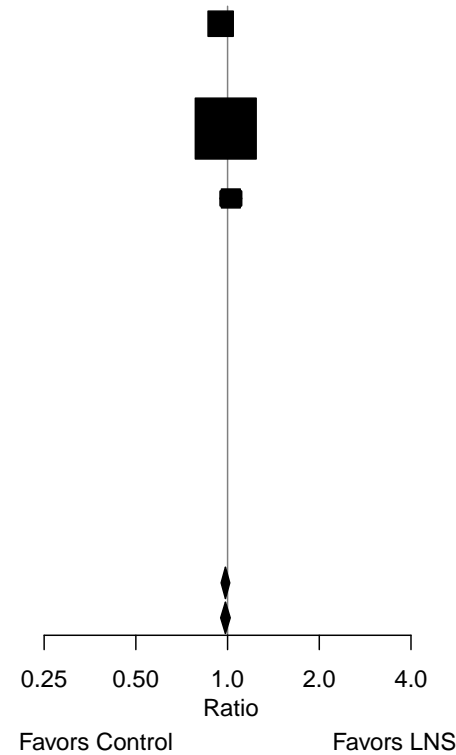

|              |                 |       |           | High AGP or CRP |                   |         |          |
|--------------|-----------------|-------|-----------|-----------------|-------------------|---------|----------|
| Country      | Trial           | LNS N | Control N | Control Median  | GMR (95% CI)      | Fixed W | Random W |
| Bangladesh   | JiVitA-4 (35)   | 268   | 98        | 88.1            | 0.97 (0.91, 1.03) | 0.29    | 0.35     |
| Burkina Faso | iLiNS-Zinc (38) | 190   | 65        | 69.0            | 1.02 (0.97, 1.06) | 0.66    | 0.56     |
| Ghana        | GHANA (40)      | 10    | 15        | 61.5            | 0.91 (0.78, 1.06) | 0.05    | 0.09     |

**468 178**

**I<sup>2</sup> = 0.30, Tau<sup>2</sup> = 0.00**  
**1.00 (0.96, 1.03)**  
**0.99 (0.94, 1.04)**

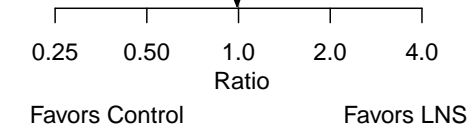

**Supplemental figure 6R: Geometric mean ratio of retinol concentration**

**6R1: Stratified by Maternal BMI (insufficient comparisons)**

Supplemental figure 6R: Geometric mean ratio of retinol concentration

6R2: Stratified by Maternal age

**P-for-interaction = 0.473**  
**Ratio of GMRs = 0.97 (0.90, 1.05)**

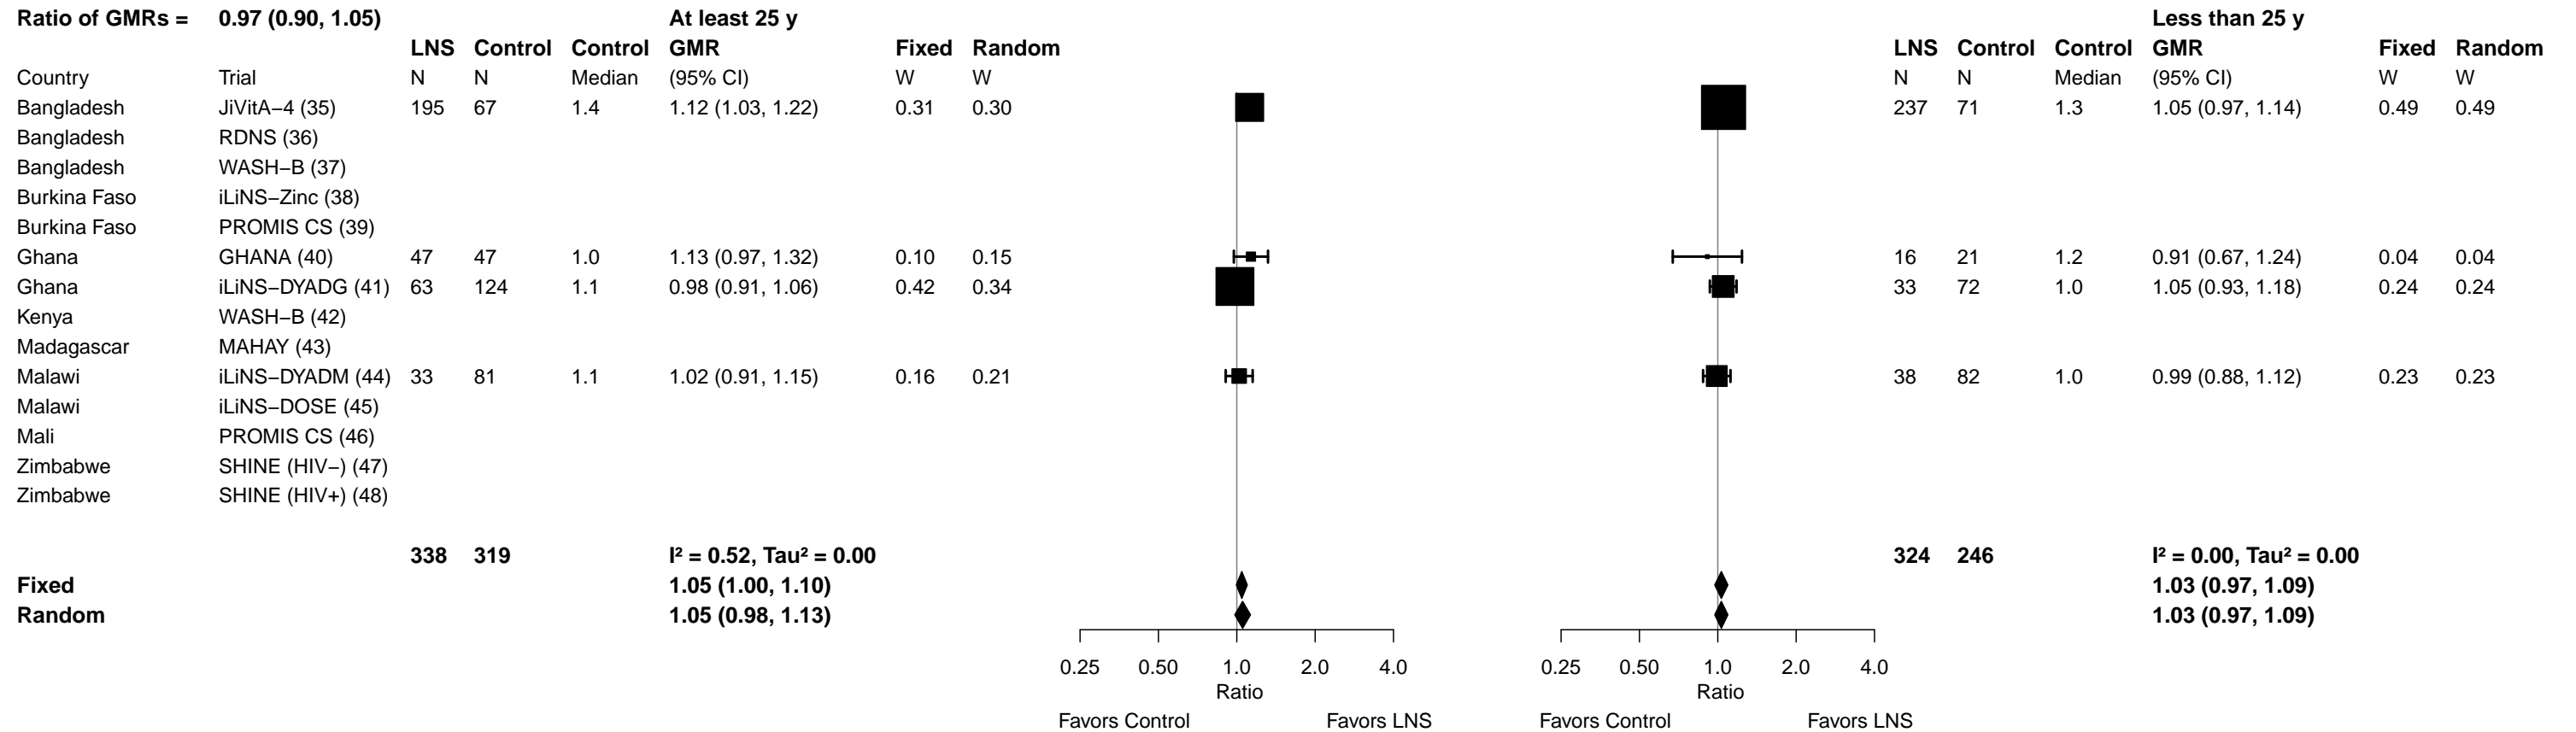



Supplemental figure 6R: Geometric mean ratio of retinol concentration

6R3: Stratified by Maternal education

**P-for-interaction = 0.607**  
**Ratio of GMRs = 0.97 (0.88, 1.08)**

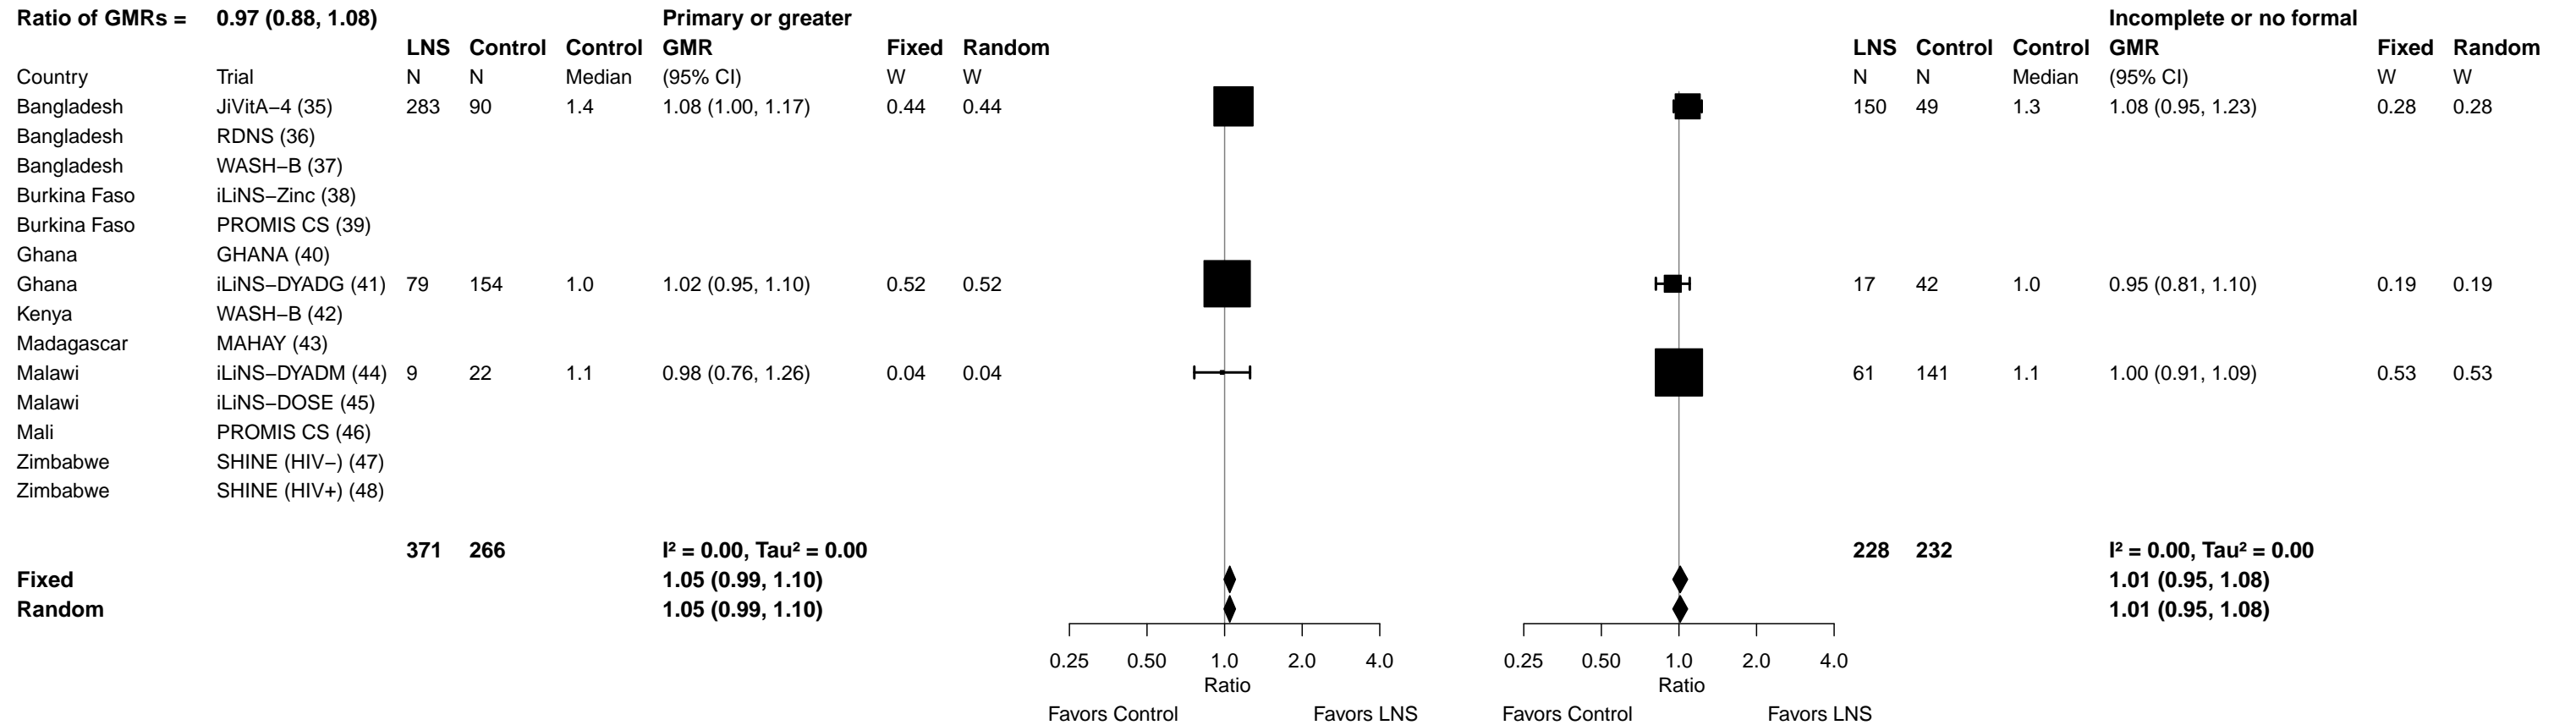

Supplemental figure 6R: Geometric mean ratio of retinol concentration

6R4: Stratified by Child sex

**P-for-interaction = 0.315**  
**Ratio of GMRs = 1.04 (0.96, 1.12)**

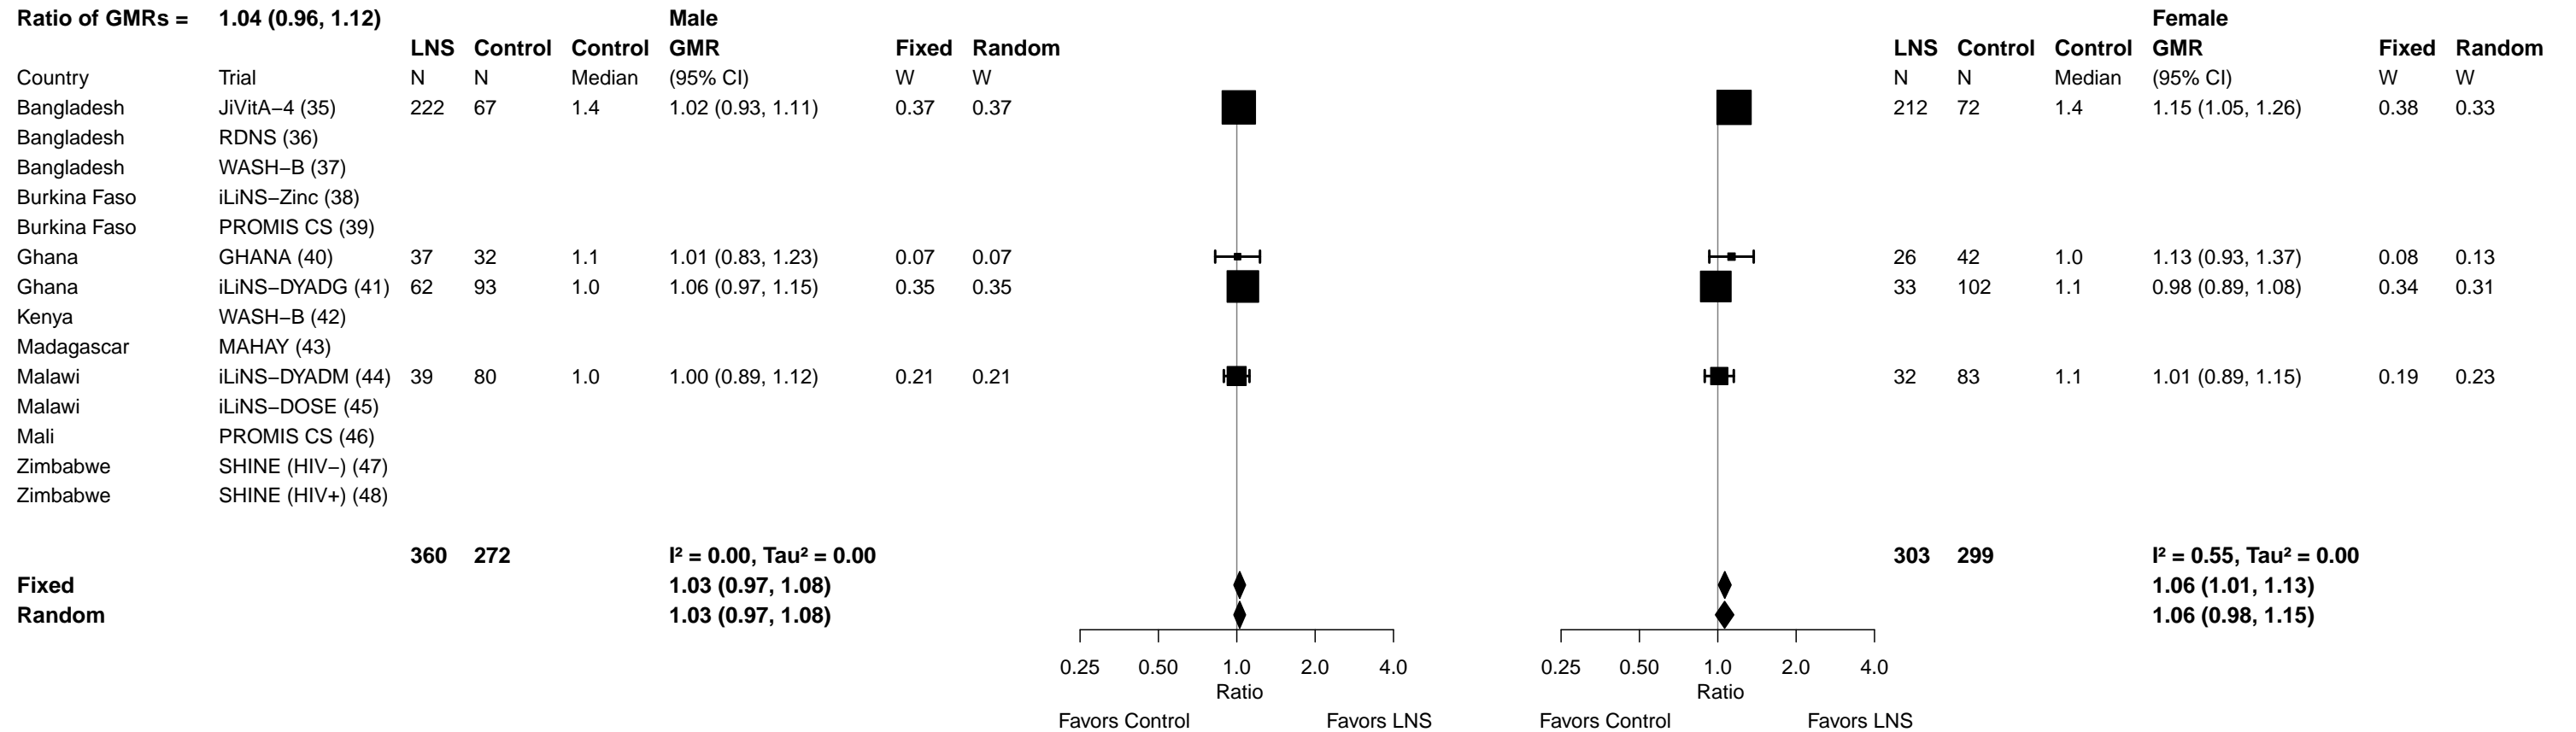

Supplemental figure 6R: Geometric mean ratio of retinol concentration

6R5: Stratified by Child birth order

**P-for-interaction = 0.862**  
**Ratio of GMRs = 0.99 (0.91, 1.09)**

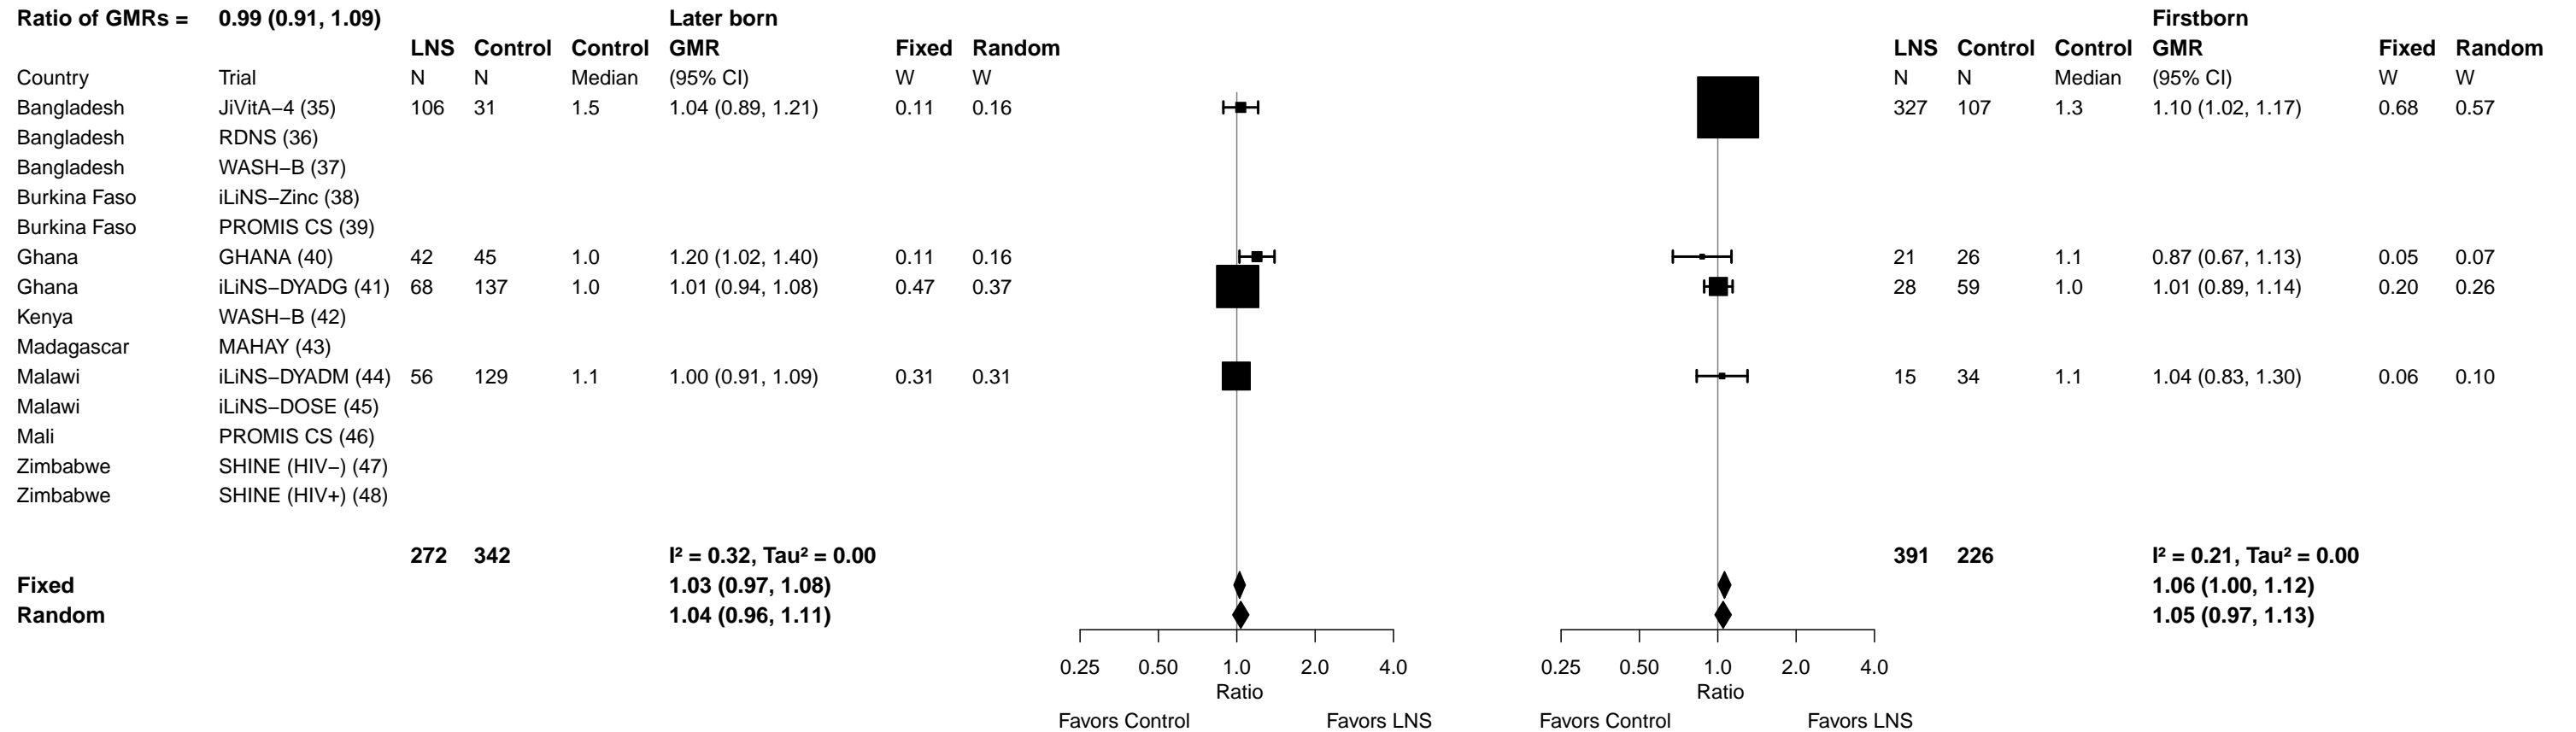

Supplemental figure 6R: Geometric mean ratio of retinol concentration

6R6: Stratified by Child baseline acute malnutrition

**P-for-interaction = 0.075**  
**Ratio of GMRs = 1.11 (0.99, 1.24)**

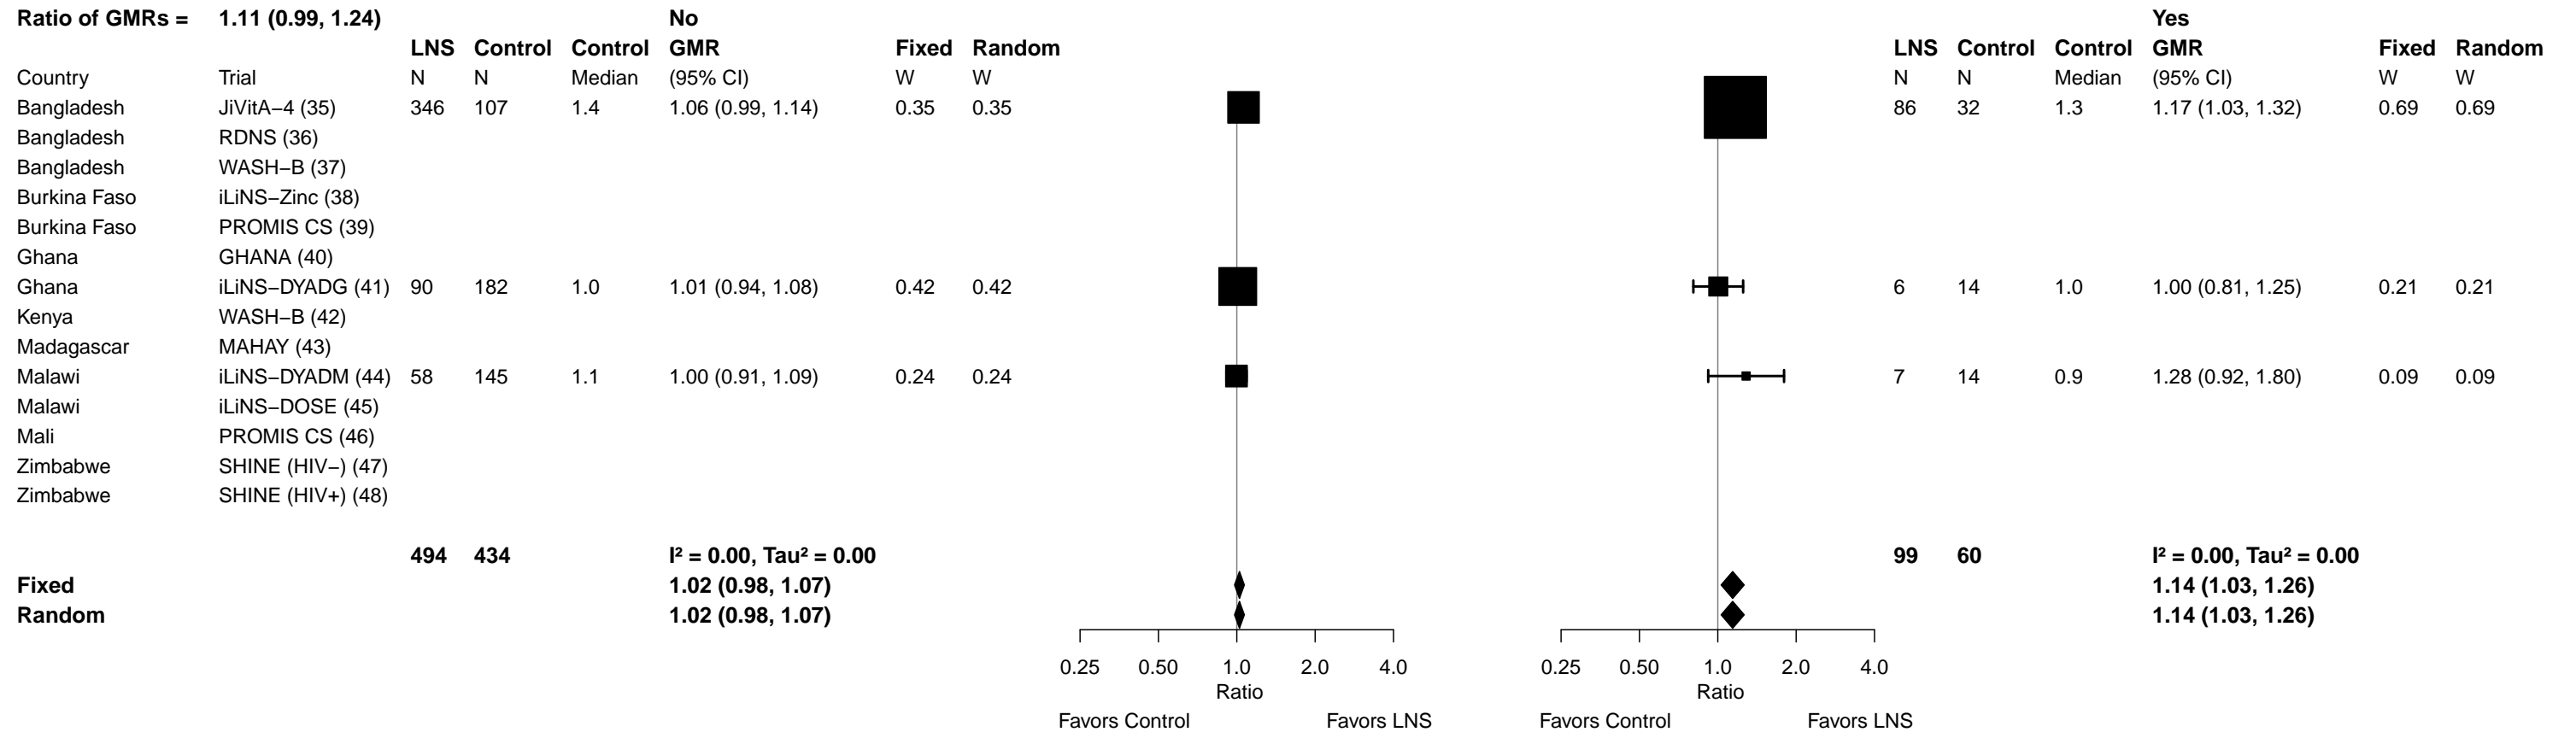

**Supplemental figure 6R: Geometric mean ratio of retinol concentration**

**6R7: Stratified by Child baseline anemia (insufficient comparisons)**

Supplemental figure 6R: Geometric mean ratio of retinol concentration

6R8: Stratified by Child high-dose vitamin A supplementation

**P-for-interaction = 0.577**  
**Ratio of GMRs = 0.98 (0.90, 1.06)**

| Country       | Trial             | LNS<br>N   | Control<br>N | Control<br>Median | Received Vita<br>GMR<br>(95% CI)                    | Fixed<br>W | Random<br>W | Not treated |              |                   |                                                     |            |             |
|---------------|-------------------|------------|--------------|-------------------|-----------------------------------------------------|------------|-------------|-------------|--------------|-------------------|-----------------------------------------------------|------------|-------------|
|               |                   |            |              |                   |                                                     |            |             | LNS<br>N    | Control<br>N | Control<br>Median | GMR<br>(95% CI)                                     | Fixed<br>W | Random<br>W |
| Bangladesh    | JiVitA-4 (35)     | 136        | 36           | 1.4               | 1.10 (1.02, 1.19)                                   | 0.41       | 0.41        | 129         | 38           | 1.4               | 1.04 (0.93, 1.17)                                   | 0.28       | 0.28        |
| Bangladesh    | RDNS (36)         |            |              |                   |                                                     |            |             |             |              |                   |                                                     |            |             |
| Bangladesh    | WASH-B (37)       |            |              |                   |                                                     |            |             |             |              |                   |                                                     |            |             |
| Burkina Faso  | iLiNS-Zinc (38)   |            |              |                   |                                                     |            |             |             |              |                   |                                                     |            |             |
| Burkina Faso  | PROMIS CS (39)    |            |              |                   |                                                     |            |             |             |              |                   |                                                     |            |             |
| Ghana         | GHANA (40)        | 27         | 47           | 1.0               | 1.07 (0.90, 1.27)                                   | 0.08       | 0.08        | 36          | 24           | 1.2               | 1.00 (0.80, 1.25)                                   | 0.07       | 0.07        |
| Ghana         | iLiNS-DYADG (41)  | 71         | 143          | 1.0               | 1.00 (0.93, 1.08)                                   | 0.43       | 0.43        | 25          | 53           | 1.1               | 1.02 (0.91, 1.15)                                   | 0.26       | 0.26        |
| Kenya         | WASH-B (42)       |            |              |                   |                                                     |            |             |             |              |                   |                                                     |            |             |
| Madagascar    | MAHAY (43)        |            |              |                   |                                                     |            |             |             |              |                   |                                                     |            |             |
| Malawi        | iLiNS-DYADM (44)  | 16         | 42           | 1.0               | 1.01 (0.84, 1.20)                                   | 0.08       | 0.08        | 54          | 119          | 1.1               | 1.00 (0.91, 1.10)                                   | 0.39       | 0.39        |
| Malawi        | iLiNS-DOSE (45)   |            |              |                   |                                                     |            |             |             |              |                   |                                                     |            |             |
| Mali          | PROMIS CS (46)    |            |              |                   |                                                     |            |             |             |              |                   |                                                     |            |             |
| Zimbabwe      | SHINE (HIV-) (47) |            |              |                   |                                                     |            |             |             |              |                   |                                                     |            |             |
| Zimbabwe      | SHINE (HIV+) (48) |            |              |                   |                                                     |            |             |             |              |                   |                                                     |            |             |
|               |                   | <b>250</b> | <b>268</b>   |                   | <b>I<sup>2</sup> = 0.00, Tau<sup>2</sup> = 0.00</b> |            |             | <b>244</b>  | <b>234</b>   |                   | <b>I<sup>2</sup> = 0.00, Tau<sup>2</sup> = 0.00</b> |            |             |
| <b>Fixed</b>  |                   |            |              |                   | <b>1.05 (1.00, 1.10)</b>                            |            |             |             |              |                   | <b>1.02 (0.96, 1.08)</b>                            |            |             |
| <b>Random</b> |                   |            |              |                   | <b>1.05 (1.00, 1.10)</b>                            |            |             |             |              |                   | <b>1.02 (0.96, 1.08)</b>                            |            |             |

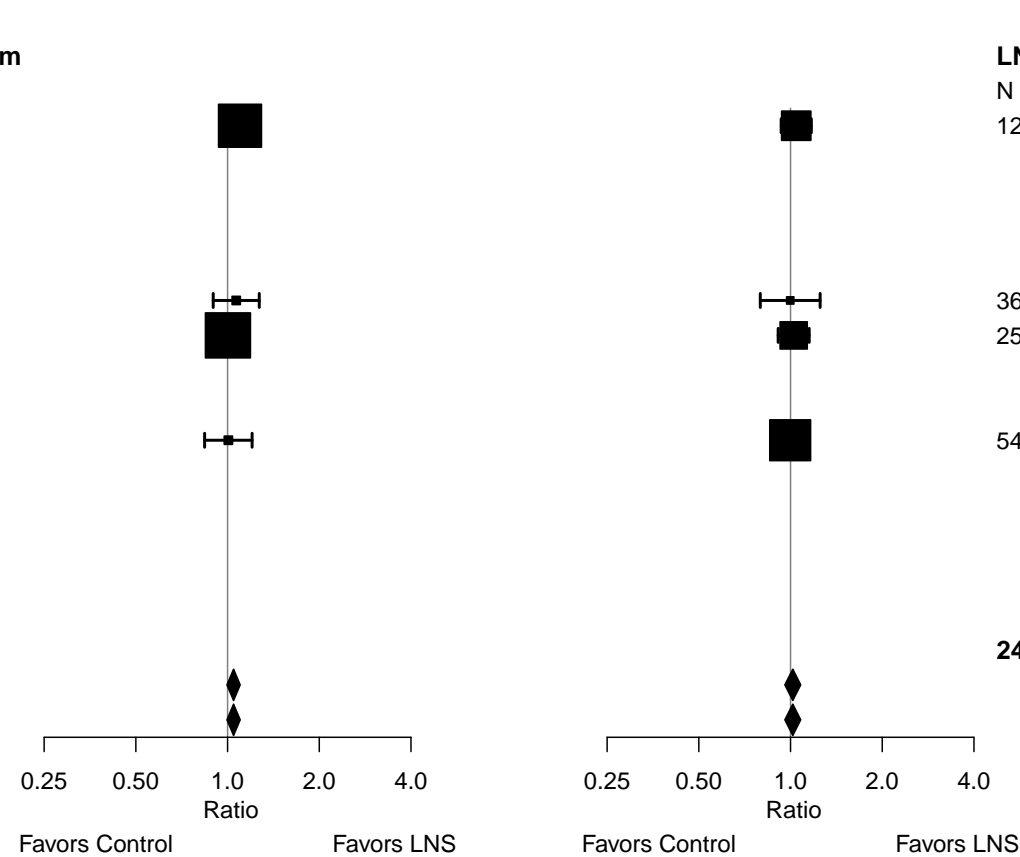

Supplemental figure 6R: Geometric mean ratio of retinol concentration

6R9: Stratified by Child inflammation

**P-for-interaction = 0.481**  
**Ratio of GMRs = 1.03 (0.95, 1.11)**

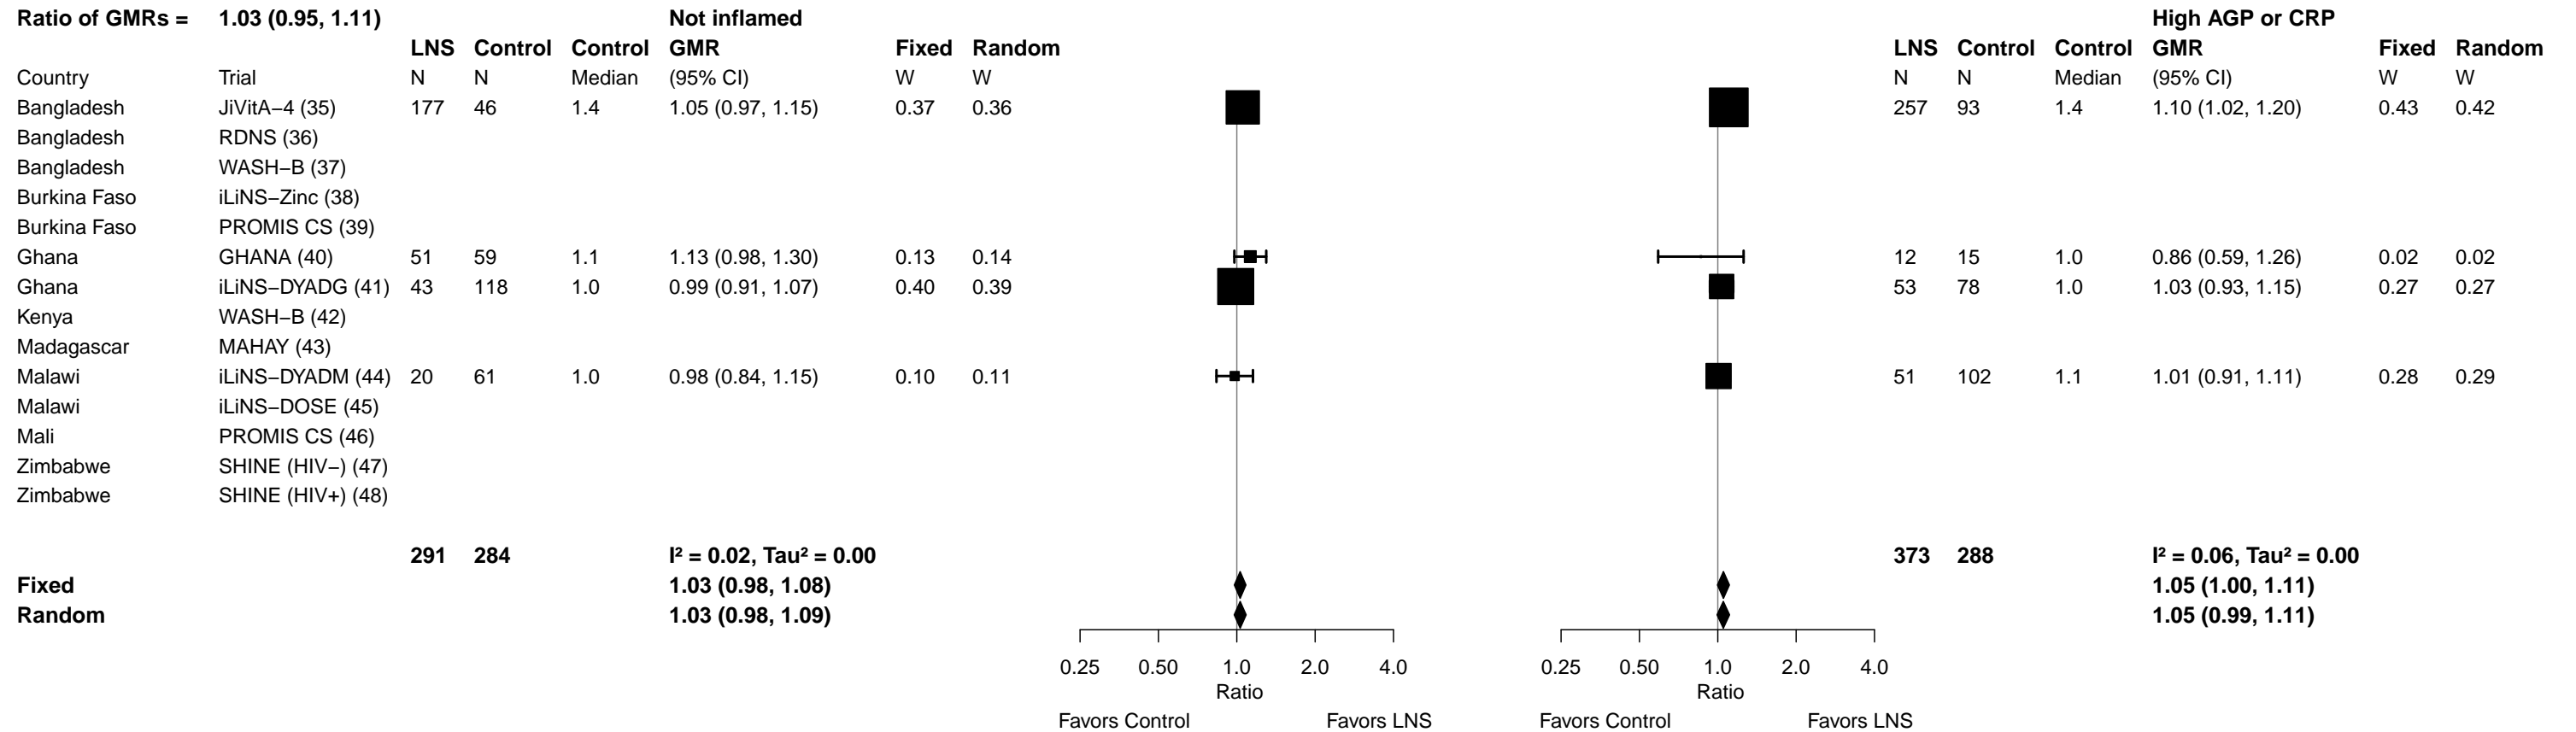

**Supplemental figure 6S: Low vitamin A (retinol < 0.70 µmol/L) prevalence ratio**

**6S1: Stratified by Maternal BMI (insufficient comparisons)**



**Supplemental figure 6S: Low vitamin A (retinol < 0.70 µmol/L) prevalence ratio**

**6S2: Stratified by Maternal age (insufficient comparisons)**

**Supplemental figure 6S: Low vitamin A (retinol < 0.70 µmol/L) prevalence ratio**

**6S3: Stratified by Maternal education (insufficient comparisons)**

**Supplemental figure 6S: Low vitamin A (retinol < 0.70 µmol/L) prevalence ratio**

**6S4: Stratified by Child sex (insufficient comparisons)**

Supplemental figure 6S: Low vitamin A (retinol < 0.70 µmol/L) prevalence ratio

6S5: Stratified by Child birth order (insufficient comparisons)

Supplemental figure 6S: Low vitamin A (retinol < 0.70 µmol/L) prevalence ratio

6S6: Stratified by Child baseline acute malnutrition (insufficient comparisons)

Supplemental figure 6S: Low vitamin A (retinol < 0.70 µmol/L) prevalence ratio

6S7: Stratified by Child baseline anemia (insufficient comparisons)

**Supplemental figure 6S: Low vitamin A (retinol < 0.70 µmol/L) prevalence ratio**

**6S8: Stratified by Child high-dose vitamin A supplementation (insufficient comparisons)**

**Supplemental figure 6S: Low vitamin A (retinol < 0.70 µmol/L) prevalence ratio**

**6S9: Stratified by Child inflammation (insufficient comparisons)**



**Supplemental figure 6T: Low vitamin A (retinol < 0.70 µmol/L) prevalence difference**

6T1: Stratified by Maternal BMI (insufficient comparisons)

**Supplemental figure 6T: Low vitamin A (retinol < 0.70 µmol/L) prevalence difference**

**6T2: Stratified by Maternal age (insufficient comparisons)**

**Supplemental figure 6T: Low vitamin A (retinol < 0.70  $\mu\text{mol/L}$ ) prevalence difference**

**6T3: Stratified by Maternal education (insufficient comparisons)**

Supplemental figure 6T: Low vitamin A (retinol < 0.70  $\mu\text{mol/L}$ ) prevalence difference

6T4: Stratified by Child sex (insufficient comparisons)

**Supplemental figure 6T: Low vitamin A (retinol < 0.70 µmol/L) prevalence difference**

**6T5: Stratified by Child birth order (insufficient comparisons)**

**Supplemental figure 6T: Low vitamin A (retinol < 0.70 µmol/L) prevalence difference**

**6T6: Stratified by Child baseline acute malnutrition (insufficient comparisons)**

Supplemental figure 6T: Low vitamin A (retinol < 0.70  $\mu\text{mol/L}$ ) prevalence difference

6T7: Stratified by Child baseline anemia (insufficient comparisons)

**Supplemental figure 6T: Low vitamin A (retinol < 0.70  $\mu\text{mol/L}$ ) prevalence difference**

**6T8: Stratified by Child high-dose vitamin A supplementation (insufficient comparisons)**



**Supplemental figure 6T: Low vitamin A (retinol < 0.70 µmol/L) prevalence difference**

**6T9: Stratified by Child inflammation (insufficient comparisons)**

**Supplemental figure 6U: Marginal vitamin A (retinol < 1.05 µmol/L) prevalence ratio**

**6U1: Stratified by Maternal BMI (insufficient comparisons)**

Supplemental figure 6U: Marginal vitamin A (retinol < 1.05 µmol/L) prevalence ratio

6U2: Stratified by Maternal age

P-for-interaction = 0.912

Ratio of PRs = 0.98 (0.73, 1.32)

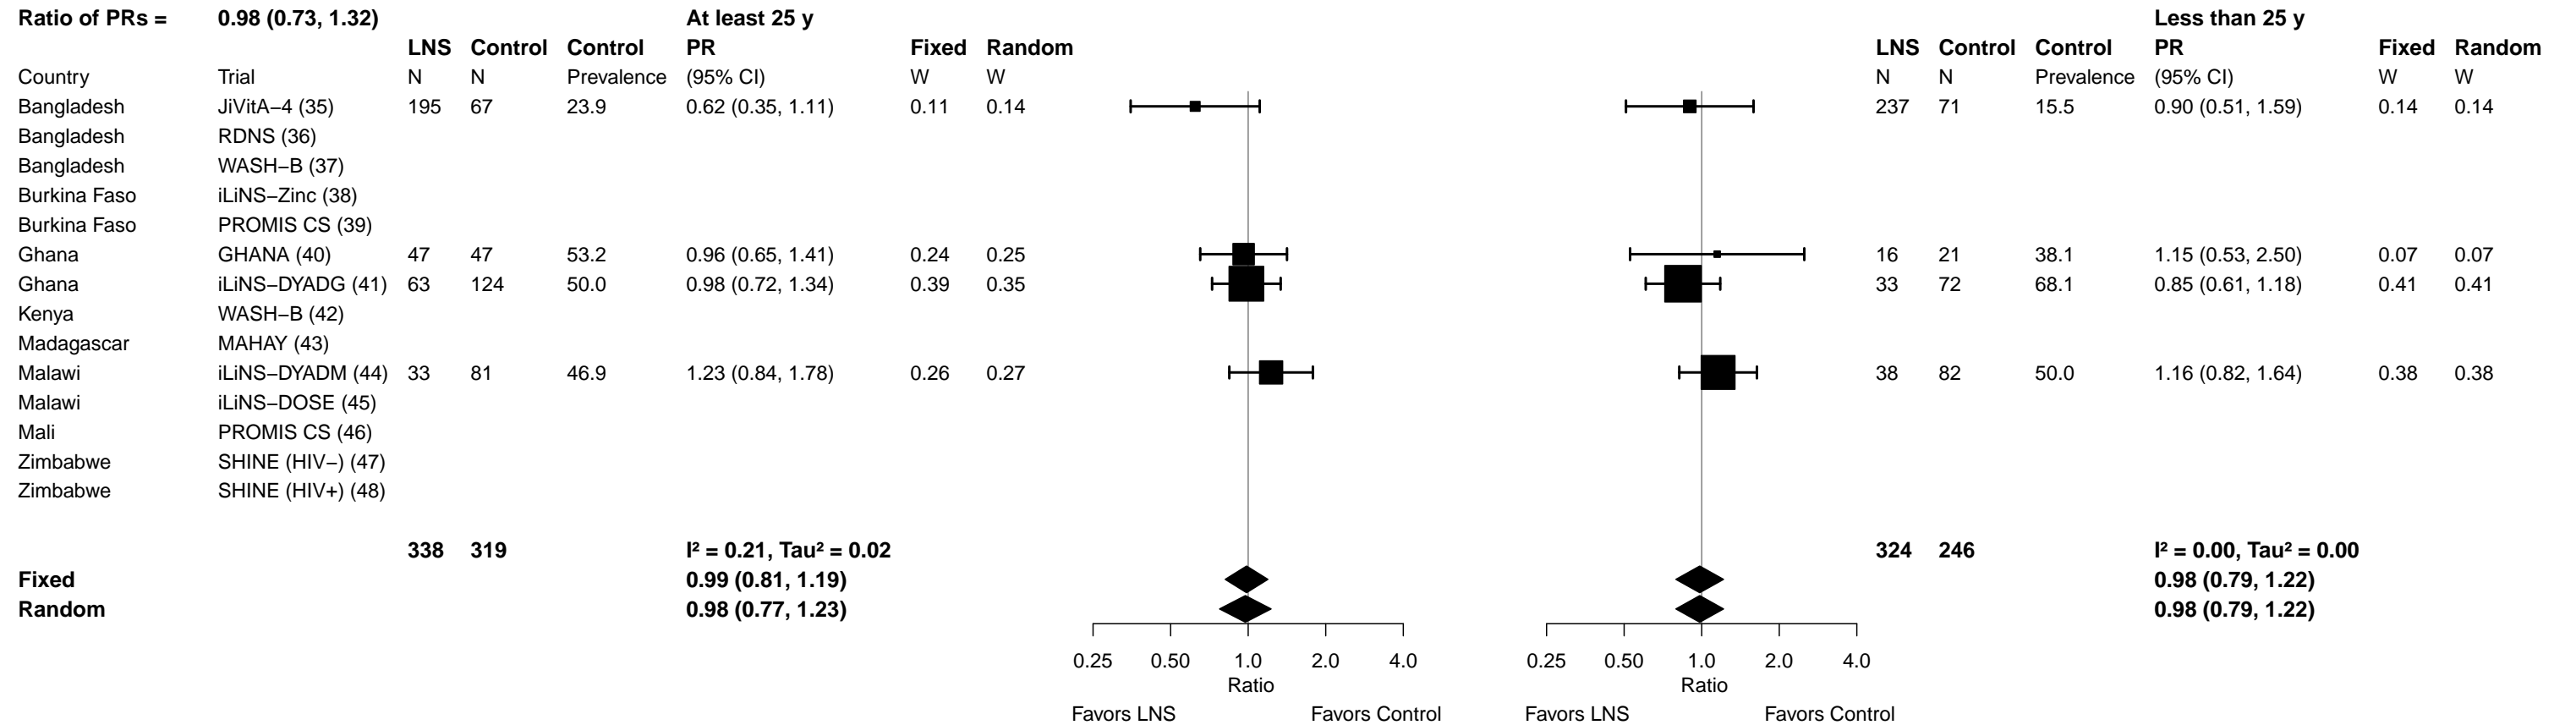

**Supplemental figure 6U: Marginal vitamin A (retinol < 1.05 µmol/L) prevalence ratio**

**6U3: Stratified by Maternal education (insufficient comparisons)**

Supplemental figure 6U: Marginal vitamin A (retinol < 1.05 µmol/L) prevalence ratio

6U4: Stratified by Child sex

P-for-interaction = 0.838

Ratio of PRs = 1.03 (0.77, 1.38)

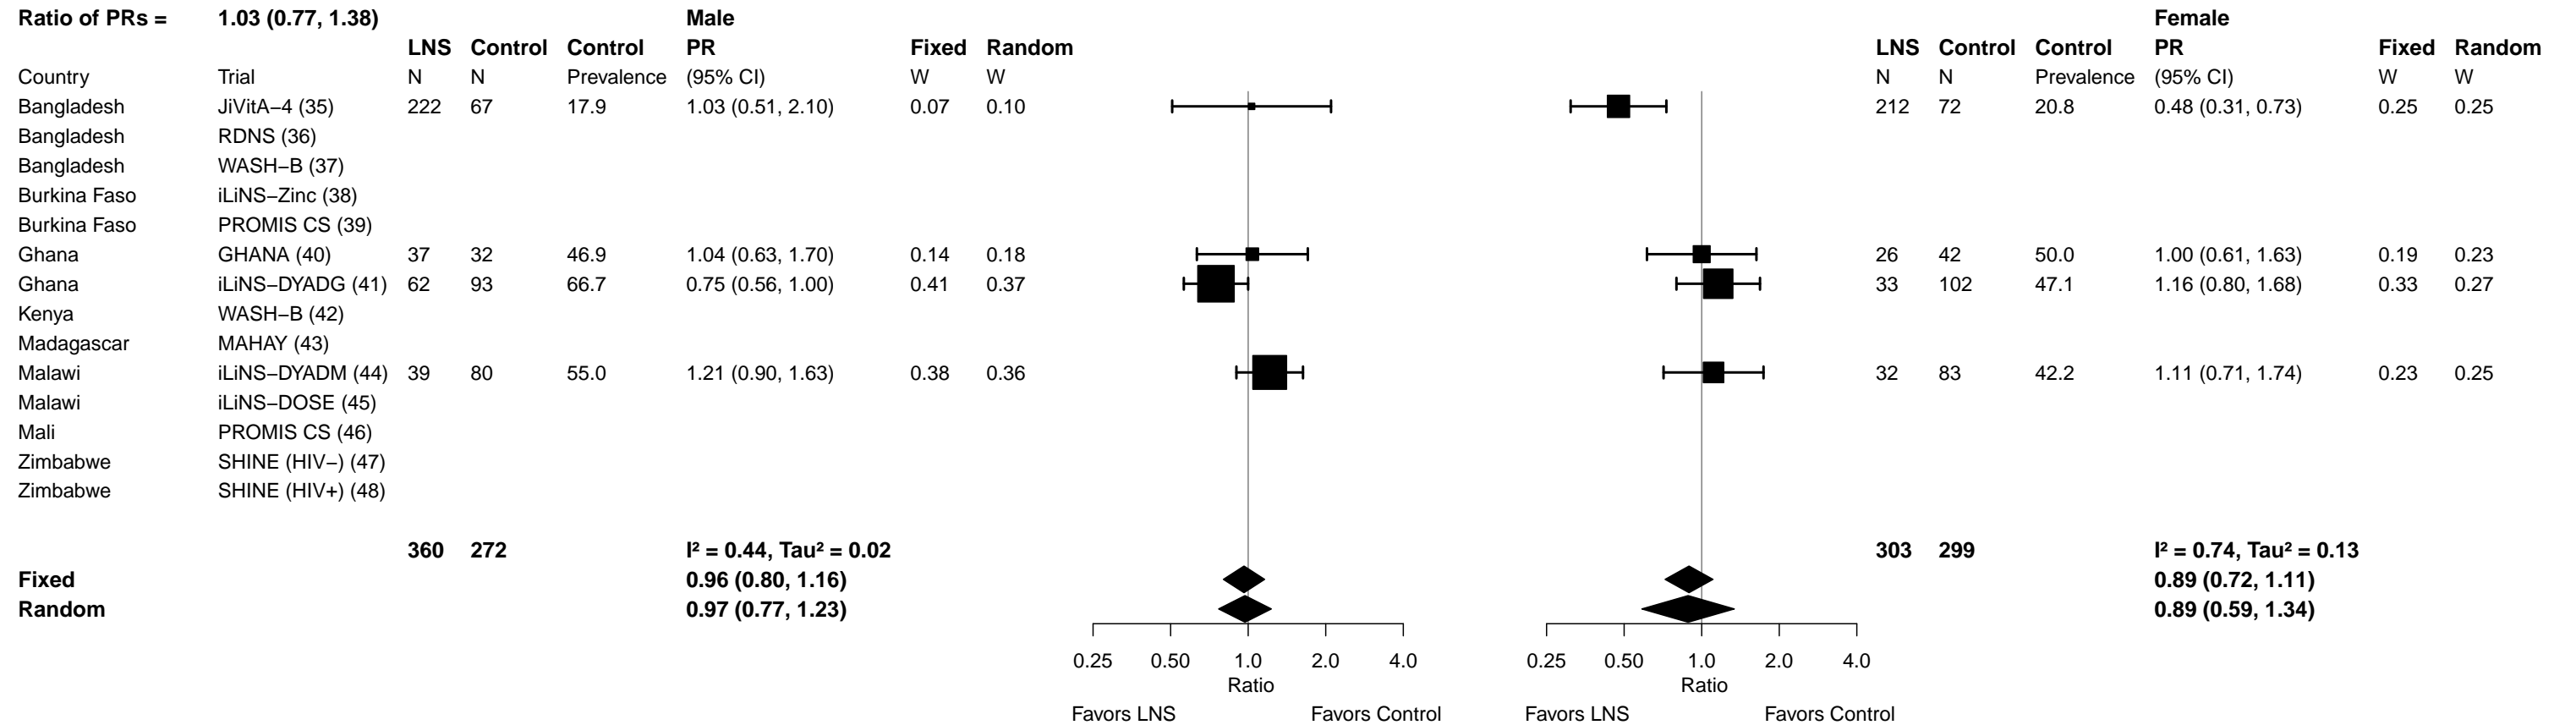

Supplemental figure 6U: Marginal vitamin A (retinol < 1.05 μmol/L) prevalence ratio

6U5: Stratified by Child birth order

P-for-interaction = 0.132

Ratio of PRs = 1.27 (0.93, 1.74)

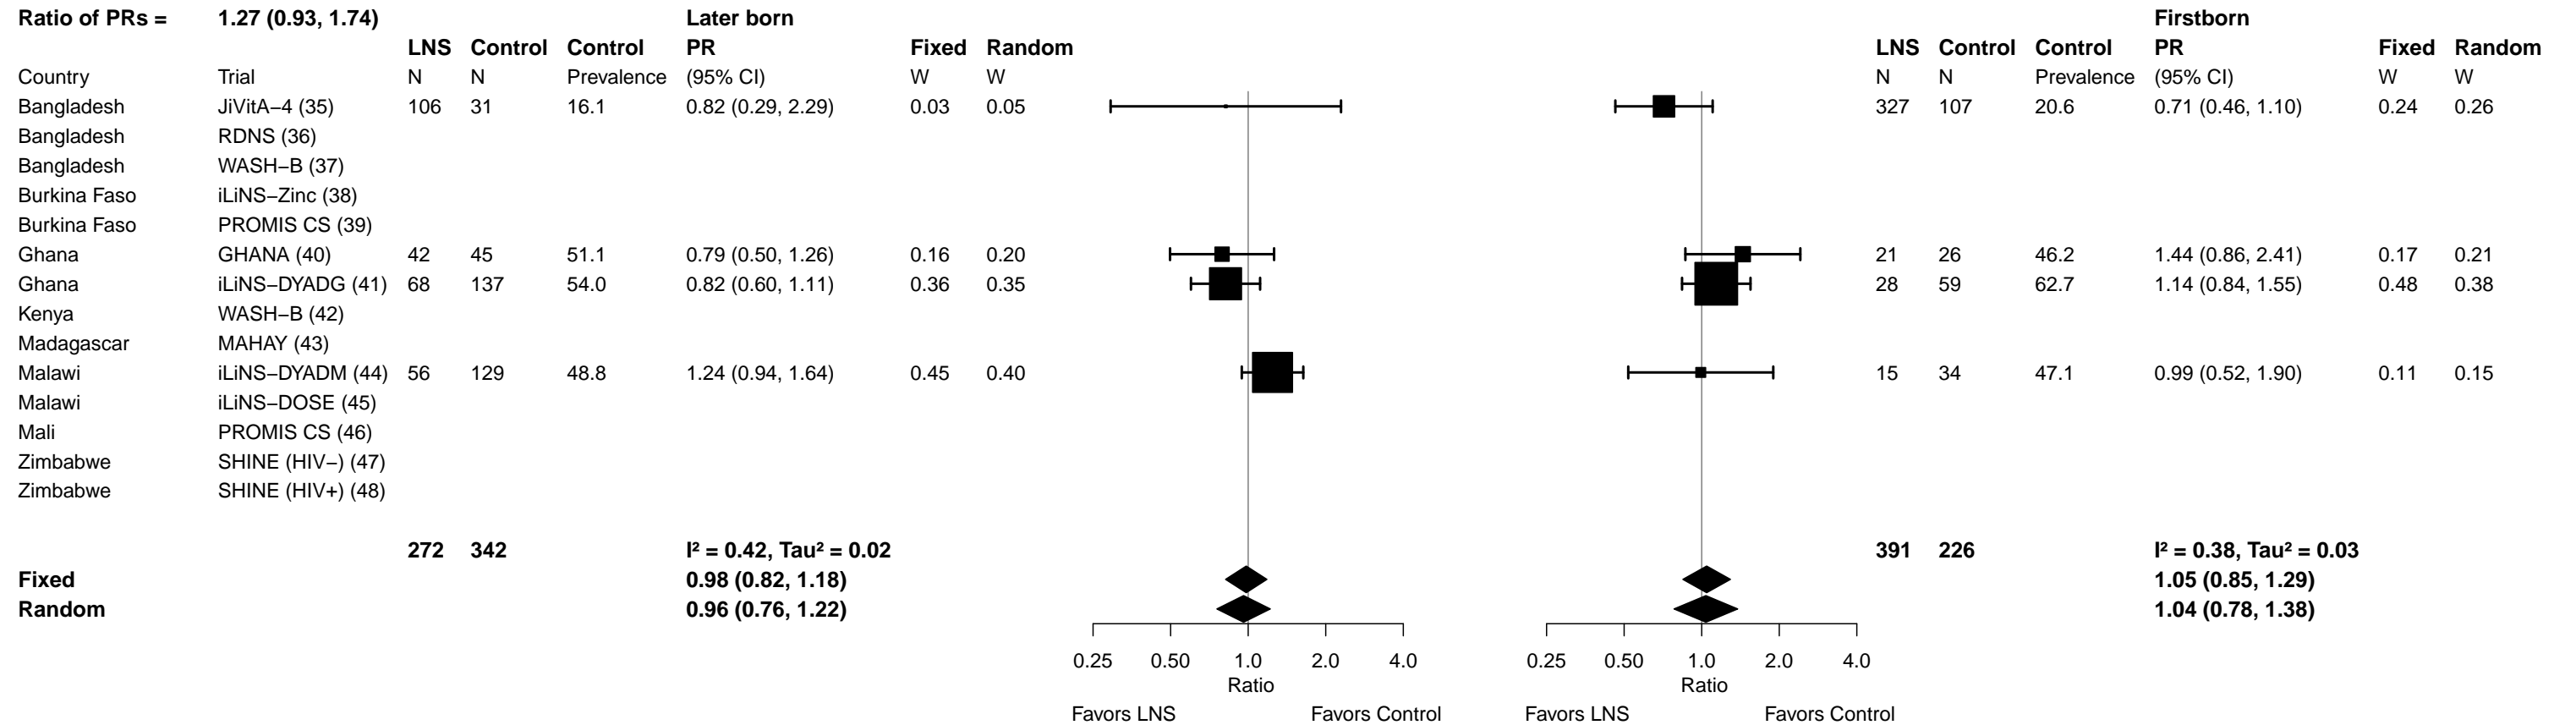

**Supplemental figure 6U: Marginal vitamin A (retinol < 1.05 µmol/L) prevalence ratio**

**6U6: Stratified by Child baseline acute malnutrition (insufficient comparisons)**

**Supplemental figure 6U: Marginal vitamin A (retinol < 1.05  $\mu\text{mol/L}$ ) prevalence ratio**

**6U7: Stratified by Child baseline anemia (insufficient comparisons)**



Supplemental figure 6U: Marginal vitamin A (retinol < 1.05 µmol/L) prevalence ratio

6U8: Stratified by Child high-dose vitamin A supplementation

P-for-interaction = 0.520

Ratio of PRs = 0.90 (0.64, 1.25)

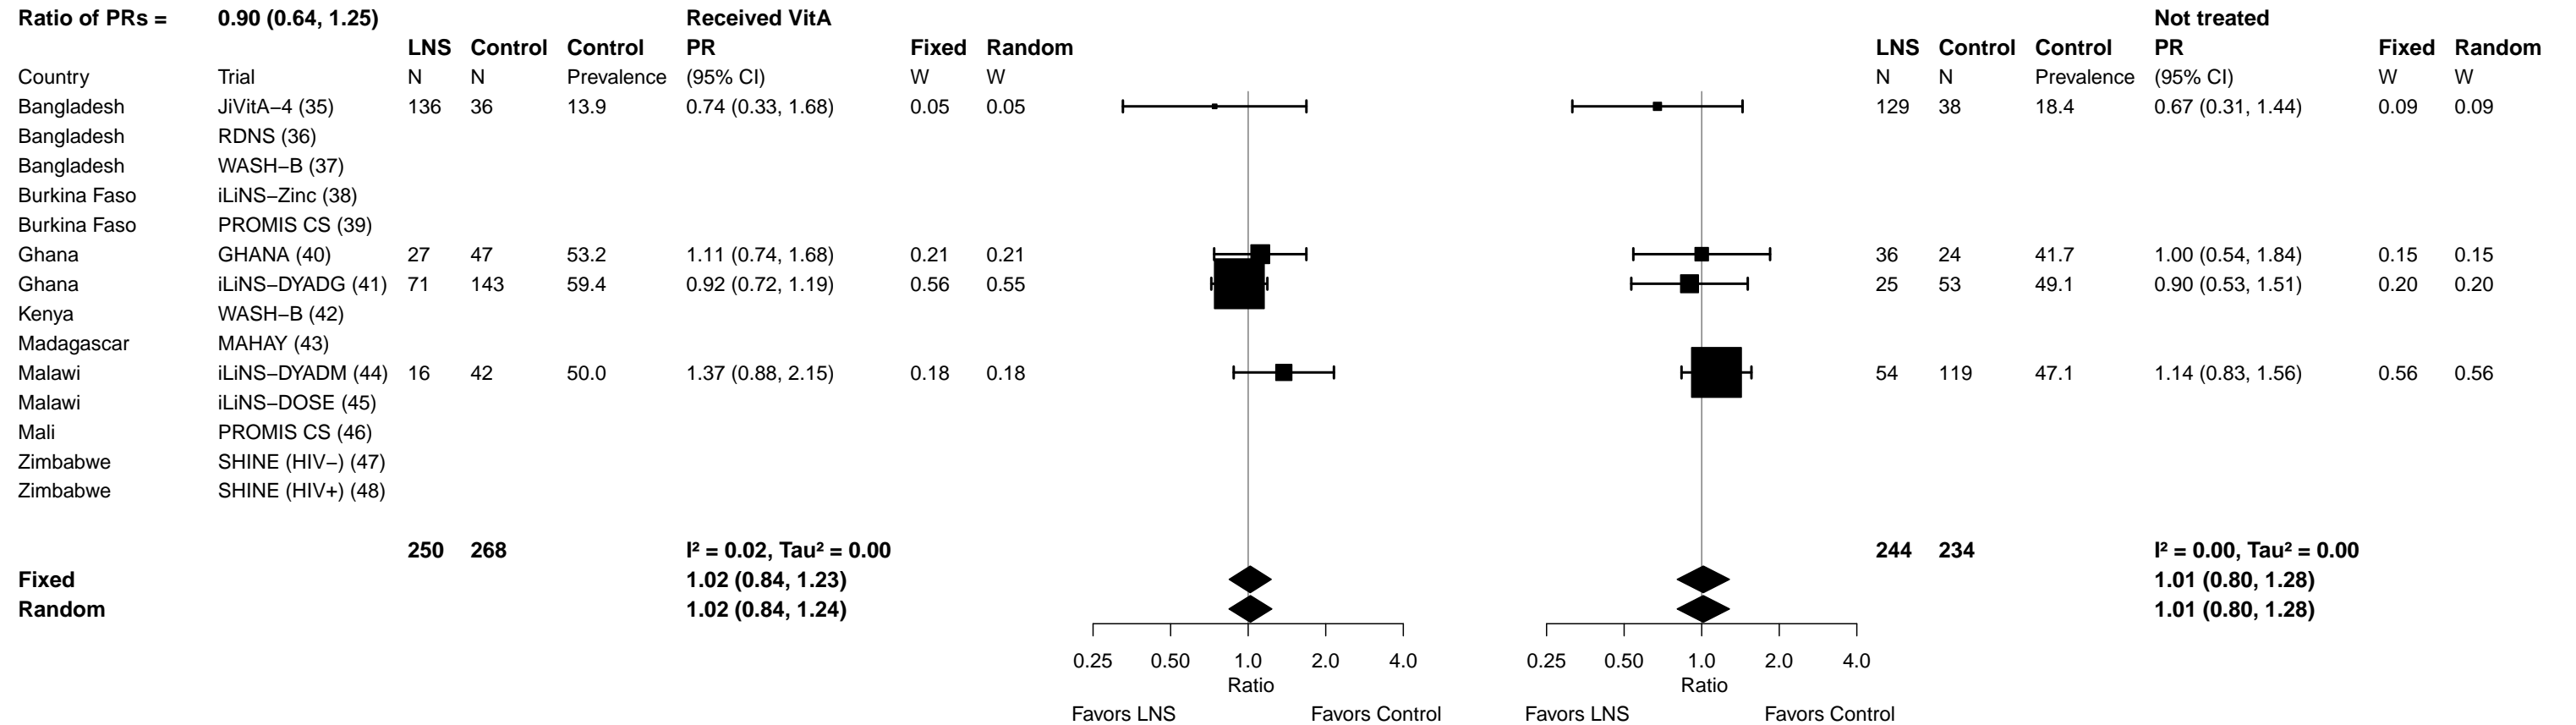

Supplemental figure 6U: Marginal vitamin A (retinol < 1.05 µmol/L) prevalence ratio

6U9: Stratified by Child inflammation

P-for-interaction = 0.775

Ratio of PRs = 0.96 (0.70, 1.30)

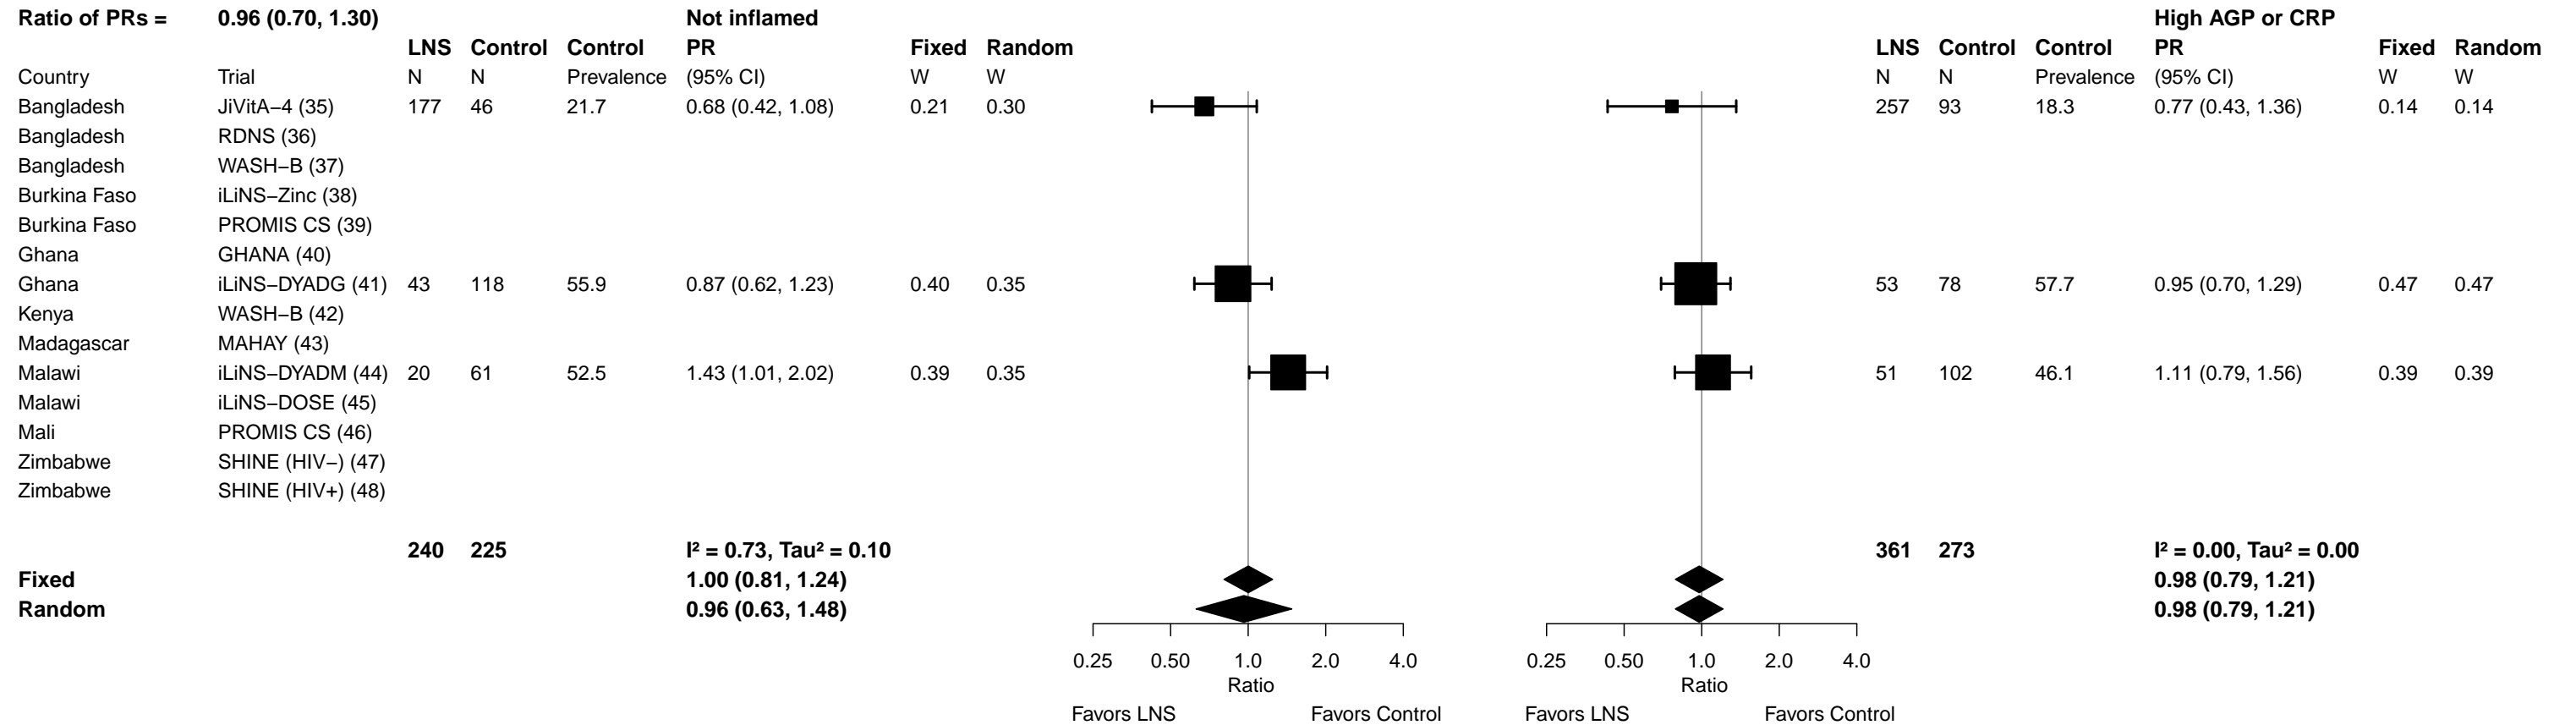

**Supplemental figure 6V: Marginal vitamin A (retinol < 1.05 µmol/L) prevalence difference**

**6V1: Stratified by Maternal BMI (insufficient comparisons)**

Supplemental figure 6V: Marginal vitamin A (retinol < 1.05 µmol/L) prevalence difference

6V2: Stratified by Maternal age

P-for-interaction = 0.659

Difference in PDs = 0.03 (-0.09, 0.14)

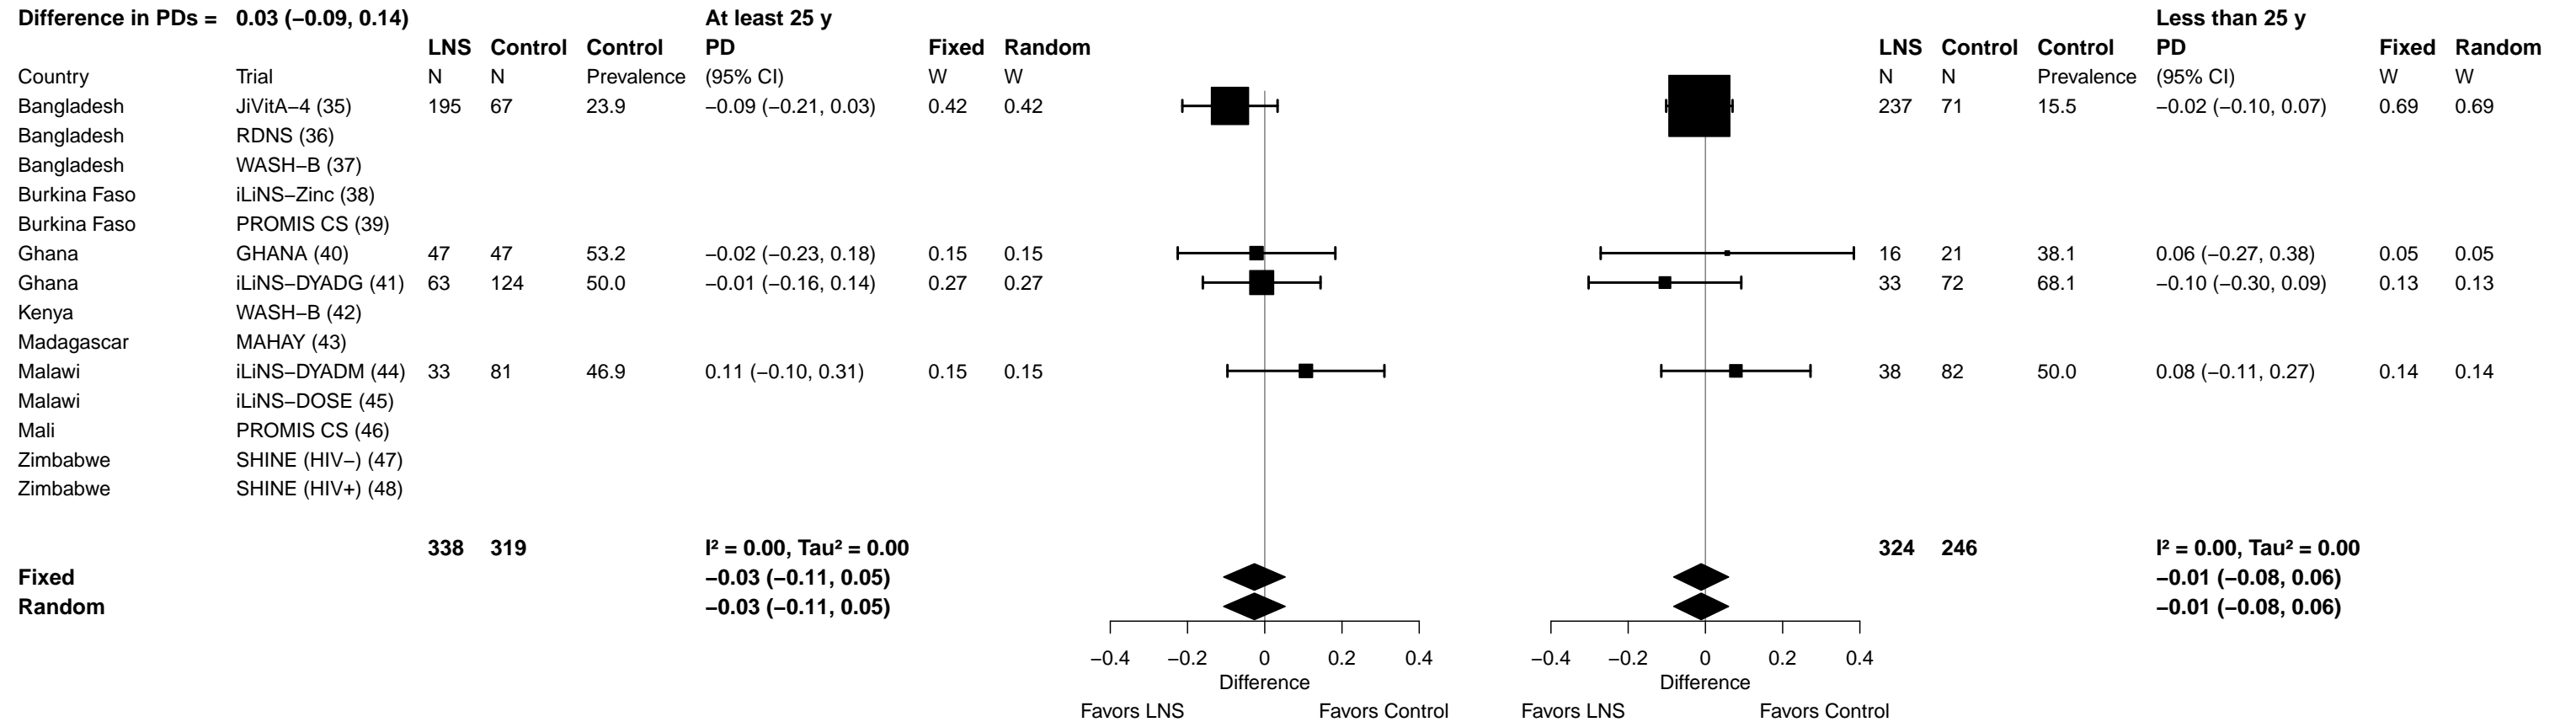

**Supplemental figure 6V: Marginal vitamin A (retinol < 1.05 µmol/L) prevalence difference**

**6V3: Stratified by Maternal education (insufficient comparisons)**

Supplemental figure 6V: Marginal vitamin A (retinol < 1.05 μmol/L) prevalence difference

6V4: Stratified by Child sex

**P-for-interaction = 0.578**

**Difference in PDs = -0.03 (-0.14, 0.08)**

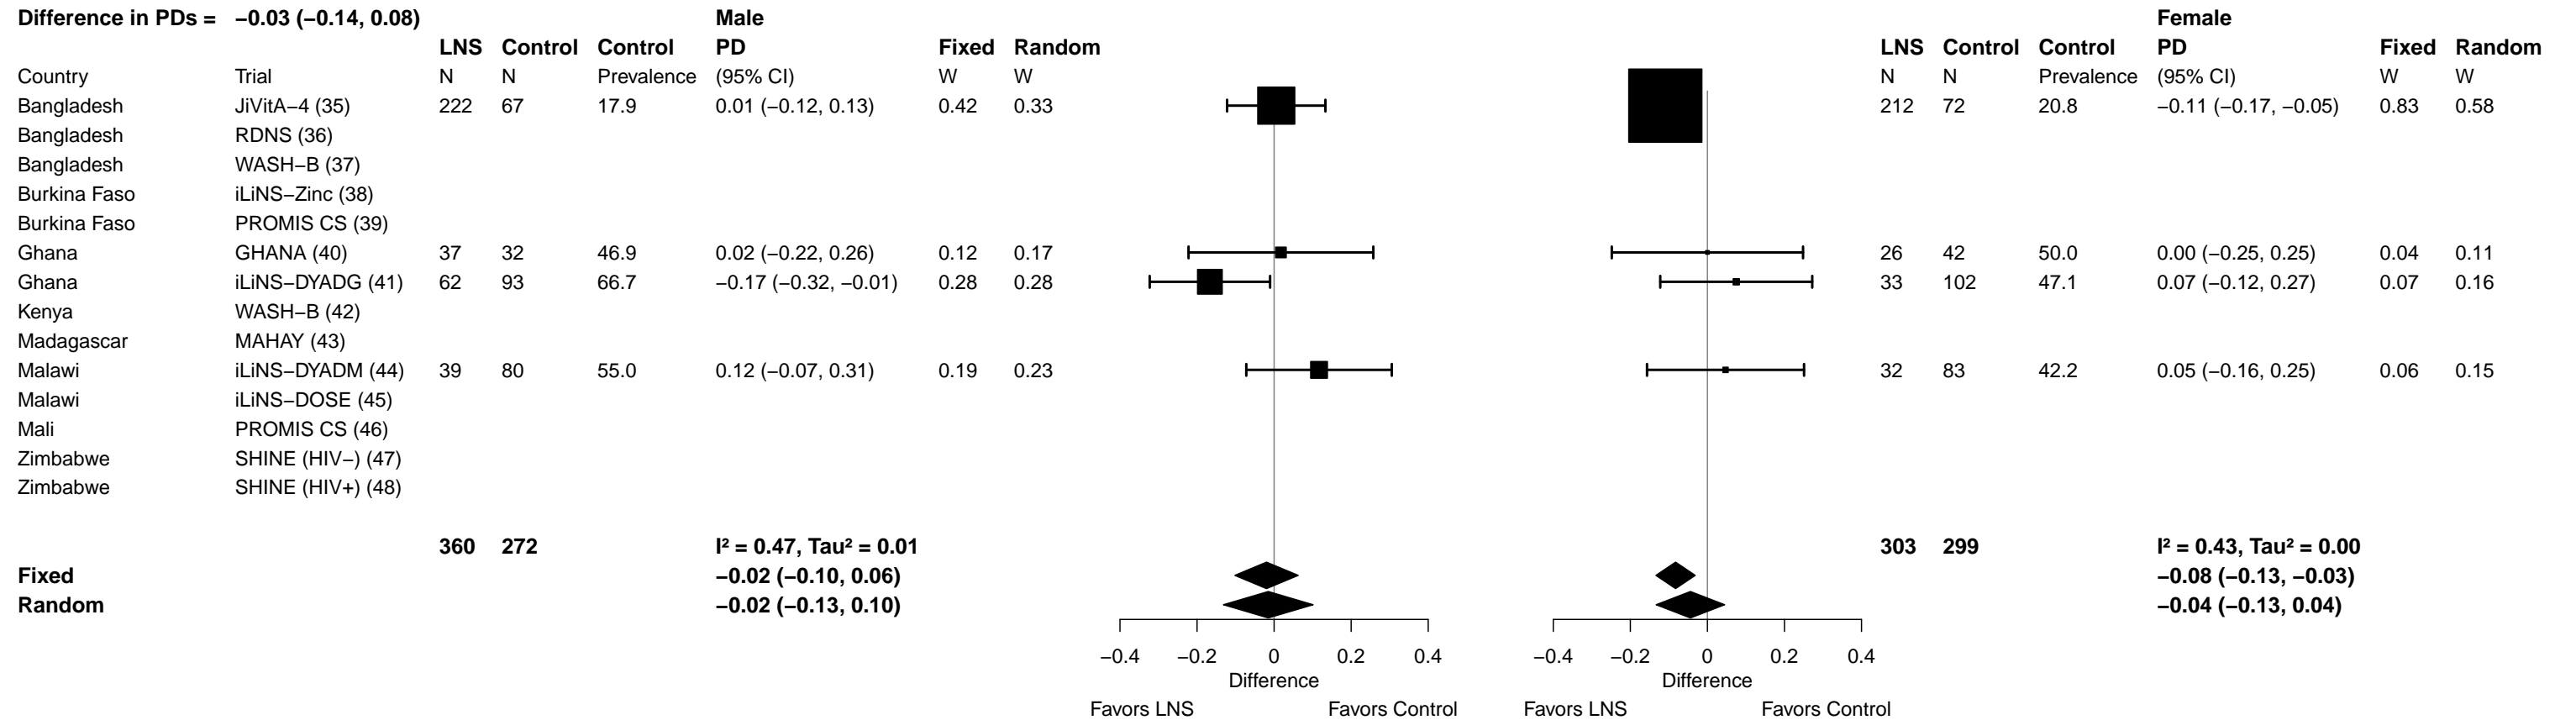

Supplemental figure 6V: Marginal vitamin A (retinol < 1.05 µmol/L) prevalence difference

6V5: Stratified by Child birth order

P-for-interaction = 0.432

Difference in PDs = 0.05 (-0.07, 0.17)

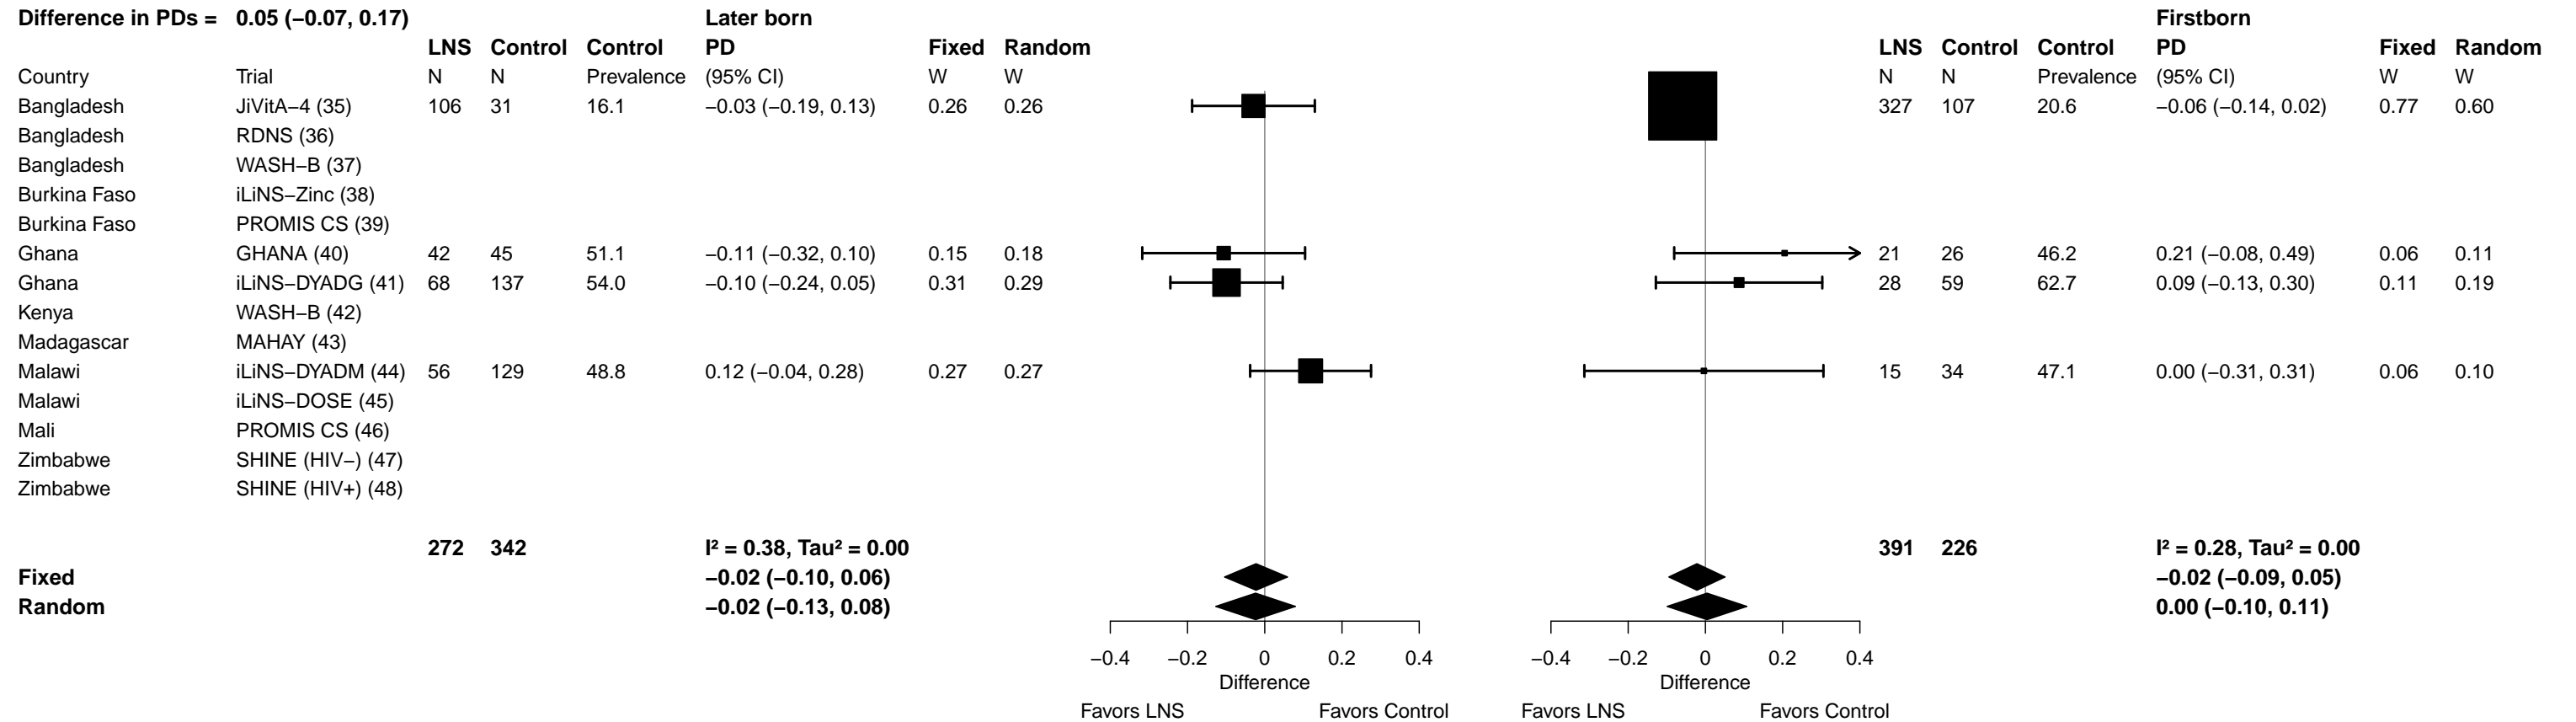

**Supplemental figure 6V: Marginal vitamin A (retinol < 1.05 µmol/L) prevalence difference**

**6V6: Stratified by Child baseline acute malnutrition (insufficient comparisons)**



**Supplemental figure 6V: Marginal vitamin A (retinol < 1.05  $\mu\text{mol/L}$ ) prevalence difference**

**6V7: Stratified by Child baseline anemia (insufficient comparisons)**

Supplemental figure 6V: Marginal vitamin A (retinol < 1.05 μmol/L) prevalence difference

6V8: Stratified by Child high-dose vitamin A supplementation

**P-for-interaction = 0.534**

**Difference in PDs = -0.04 (-0.17, 0.09)**

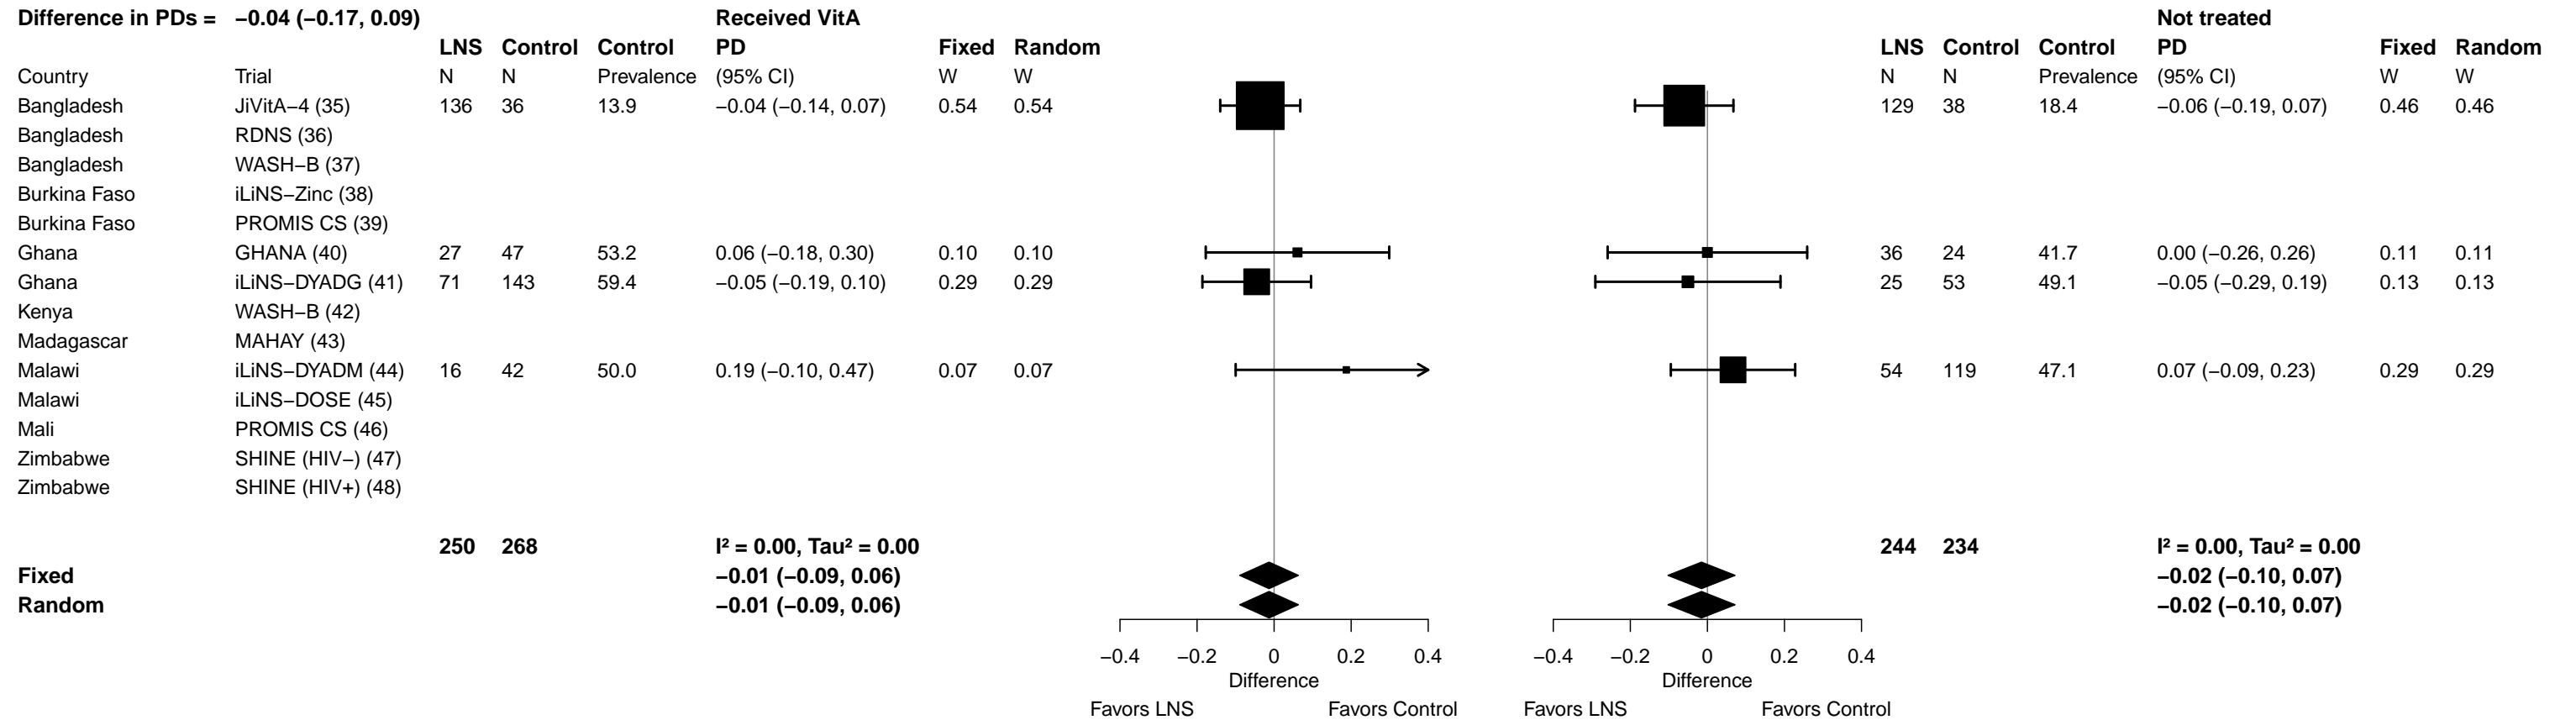

Supplemental figure 6V: Marginal vitamin A (retinol < 1.05 μmol/L) prevalence difference

6V9: Stratified by Child inflammation

P-for-interaction = 0.927

Difference in PDs = -0.01 (-0.13, 0.12)

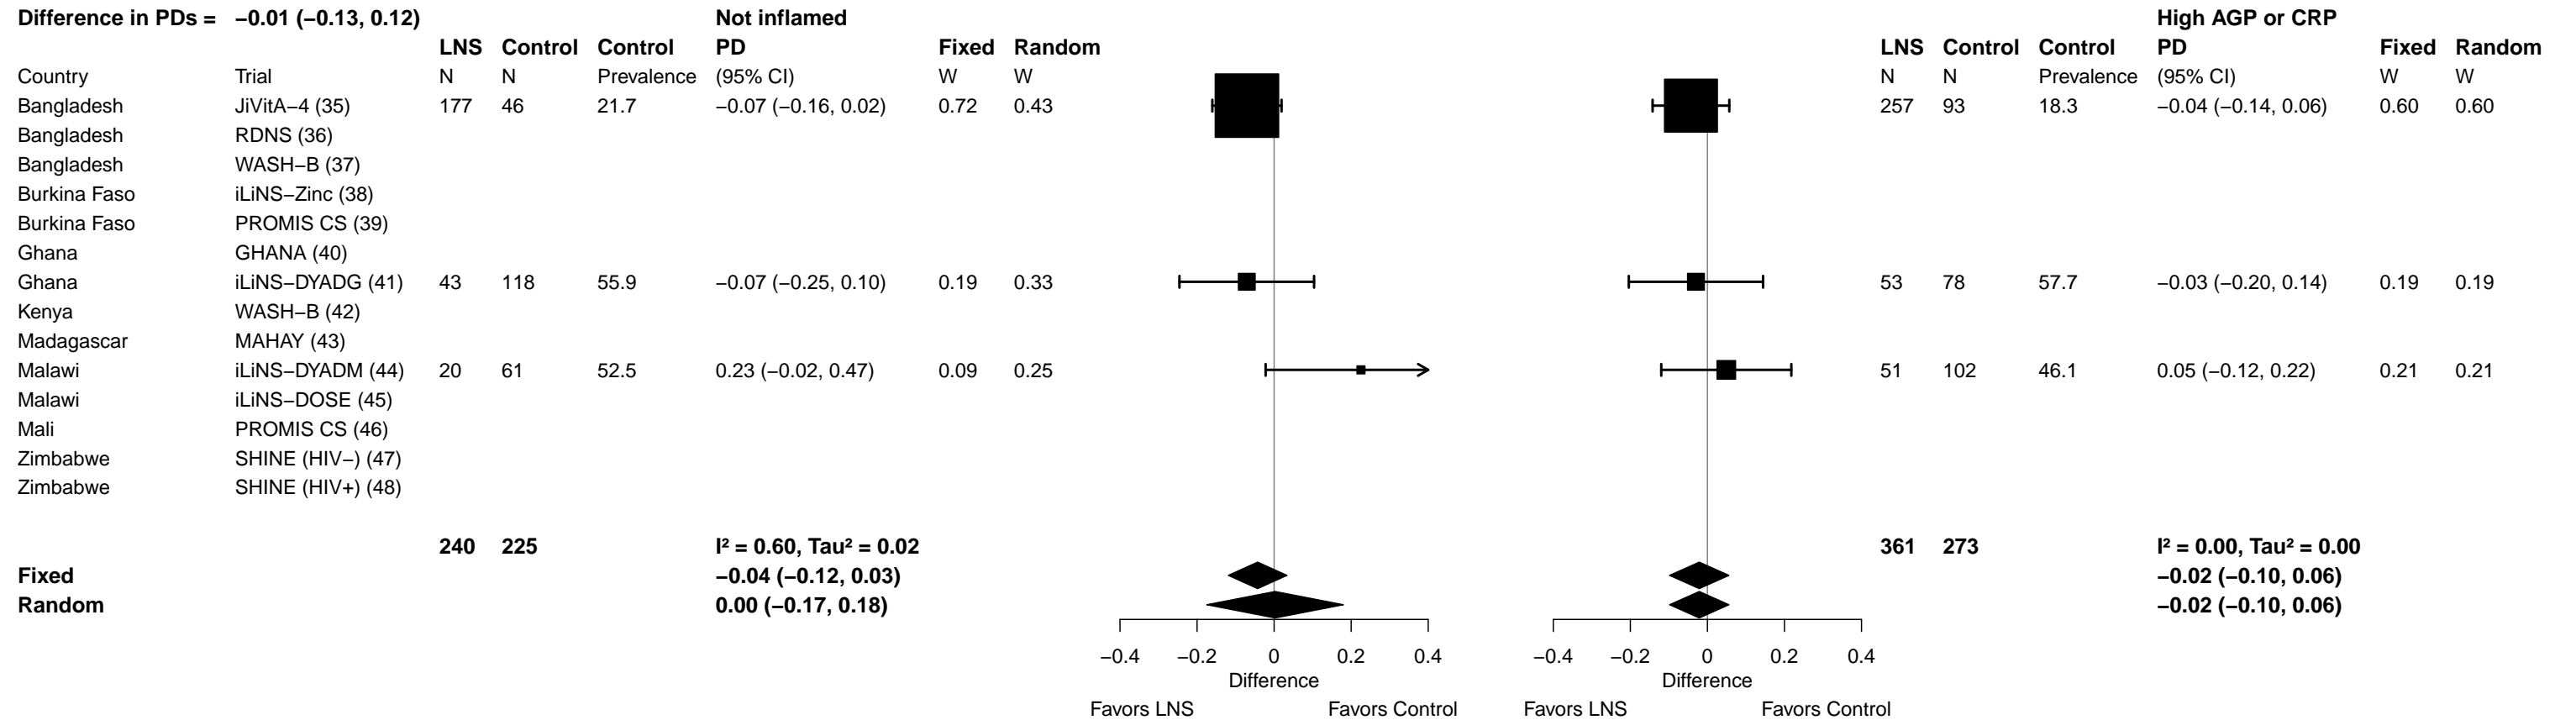

### Supplemental figure 6W: Geometric mean ratio of retinol binding protein concentration

#### 6W1: Stratified by Maternal BMI

**P-for-interaction = 0.572**  
**Ratio of GMRs = 0.99 (0.95, 1.03)**

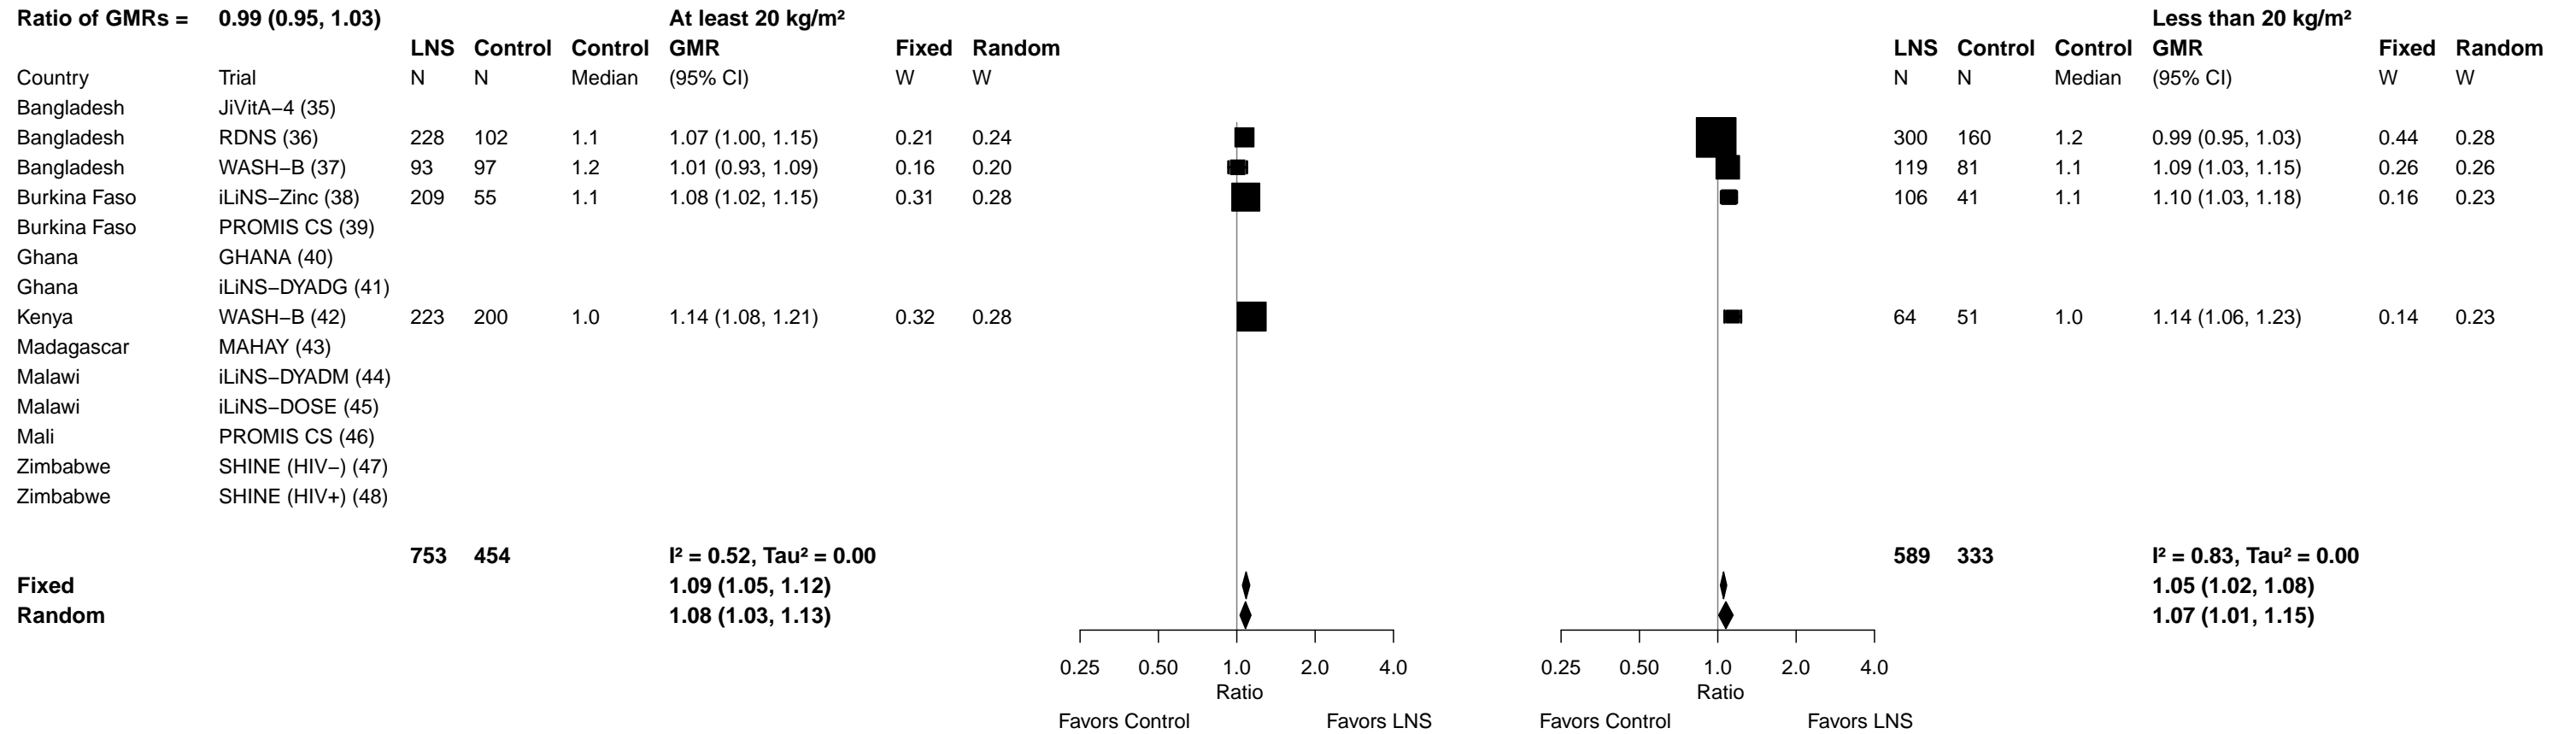

Supplemental figure 6W: Geometric mean ratio of retinol binding protein concentration

6W2: Stratified by Maternal age

**P-for-interaction = 0.657**  
**Ratio of GMRs = 0.99 (0.95, 1.03)**

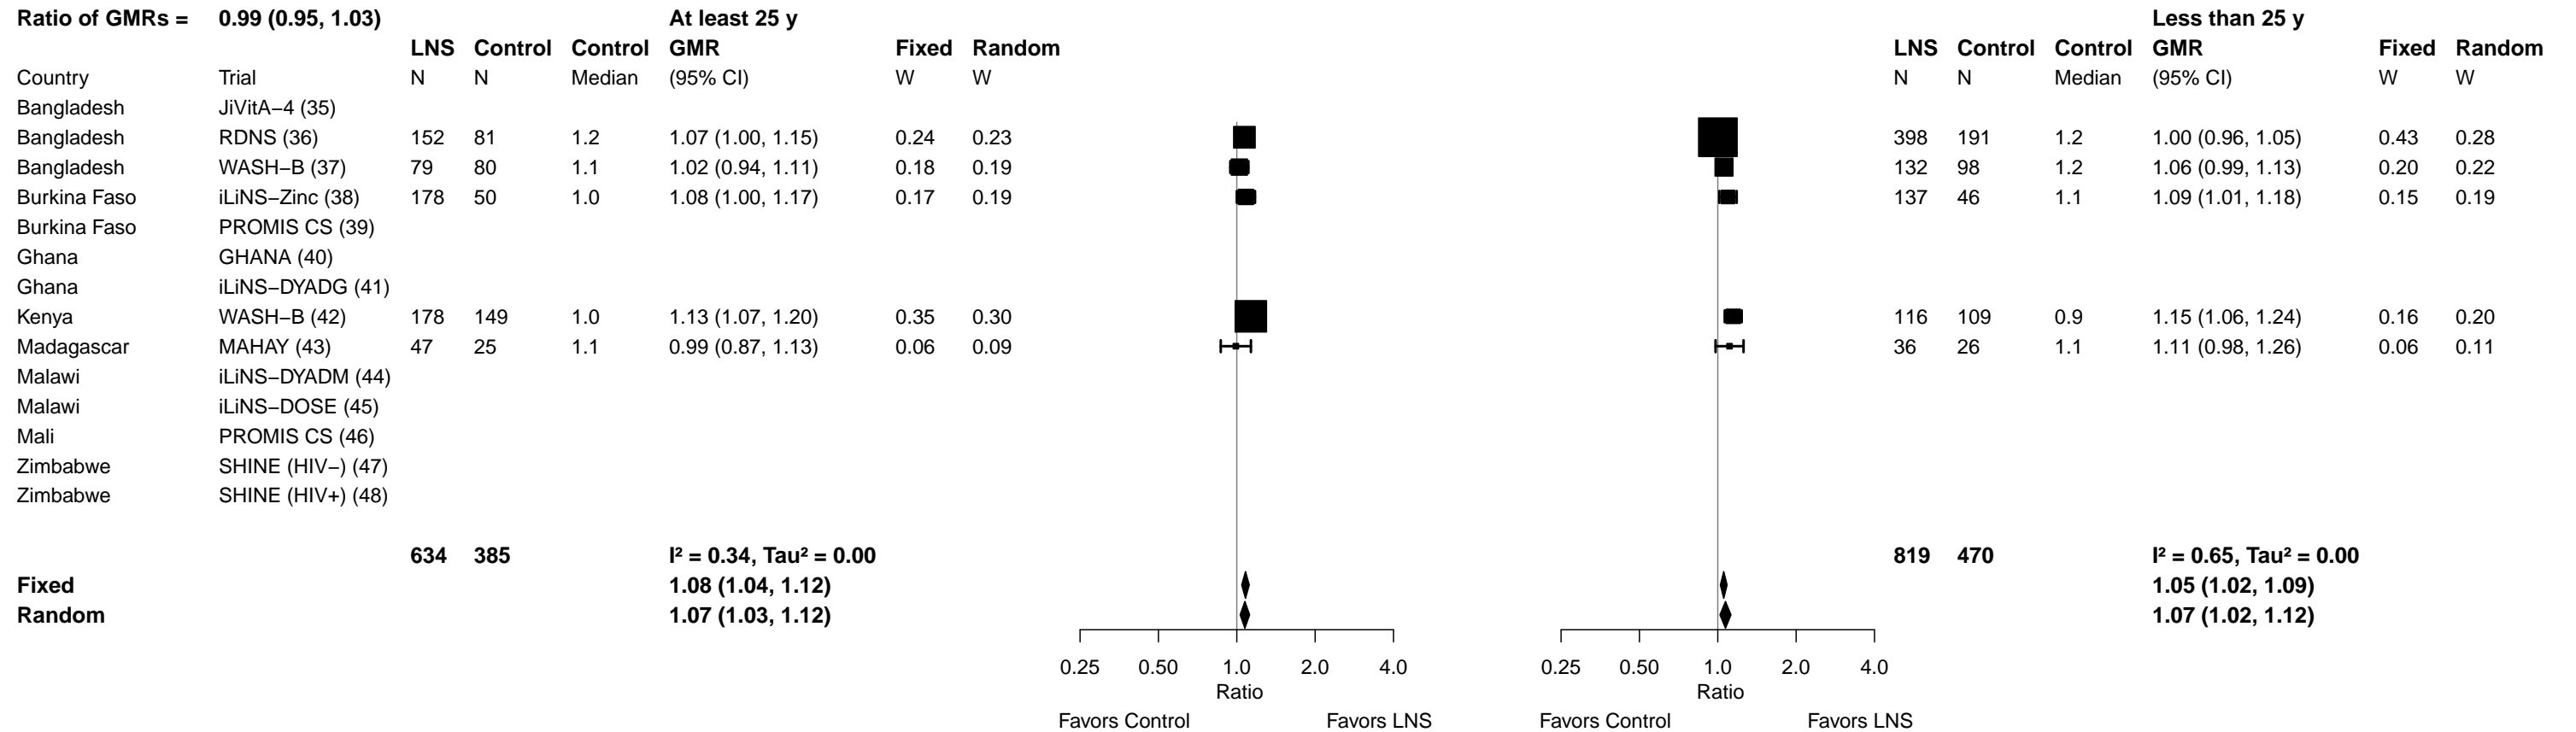

Supplemental figure 6W: Geometric mean ratio of retinol binding protein concentration

6W3: Stratified by Maternal education

**P-for-interaction = 0.793**  
**Ratio of GMRs = 1.01 (0.95, 1.07)**

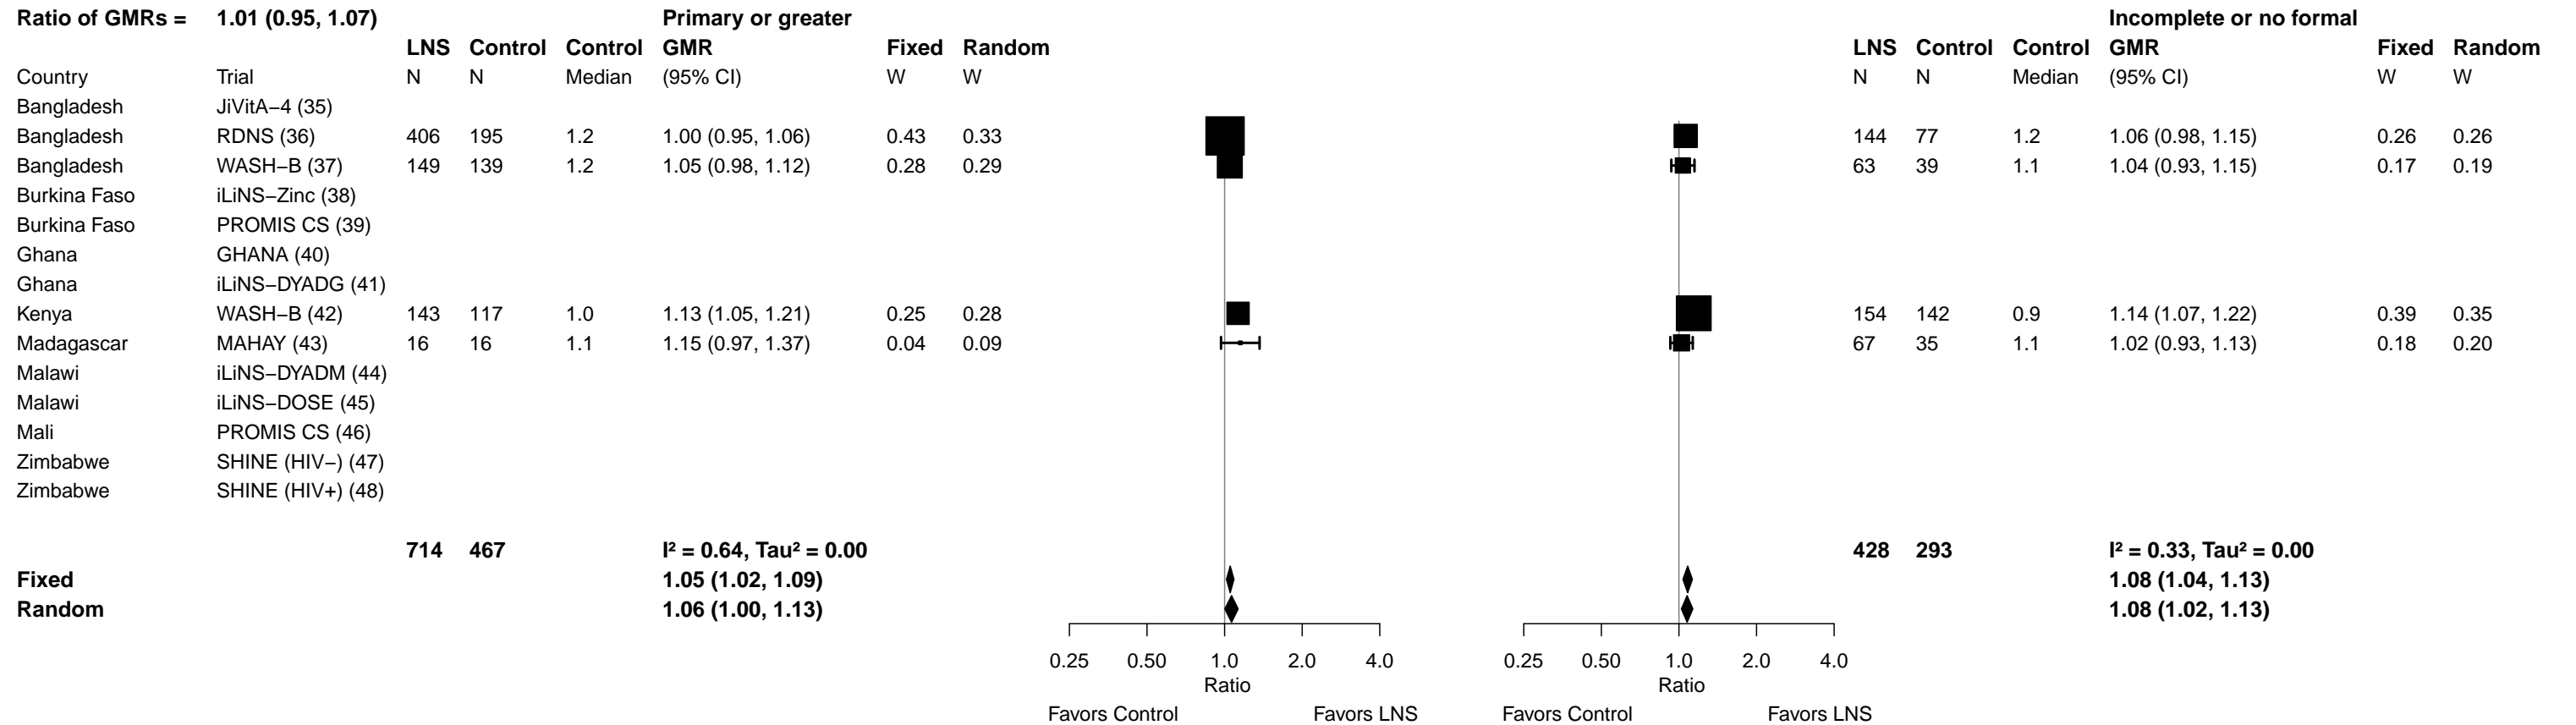

Supplemental figure 6W: Geometric mean ratio of retinol binding protein concentration

6W4: Stratified by Child sex

**P-for-interaction = 0.100**  
**Ratio of GMRs = 1.03 (0.99, 1.07)**

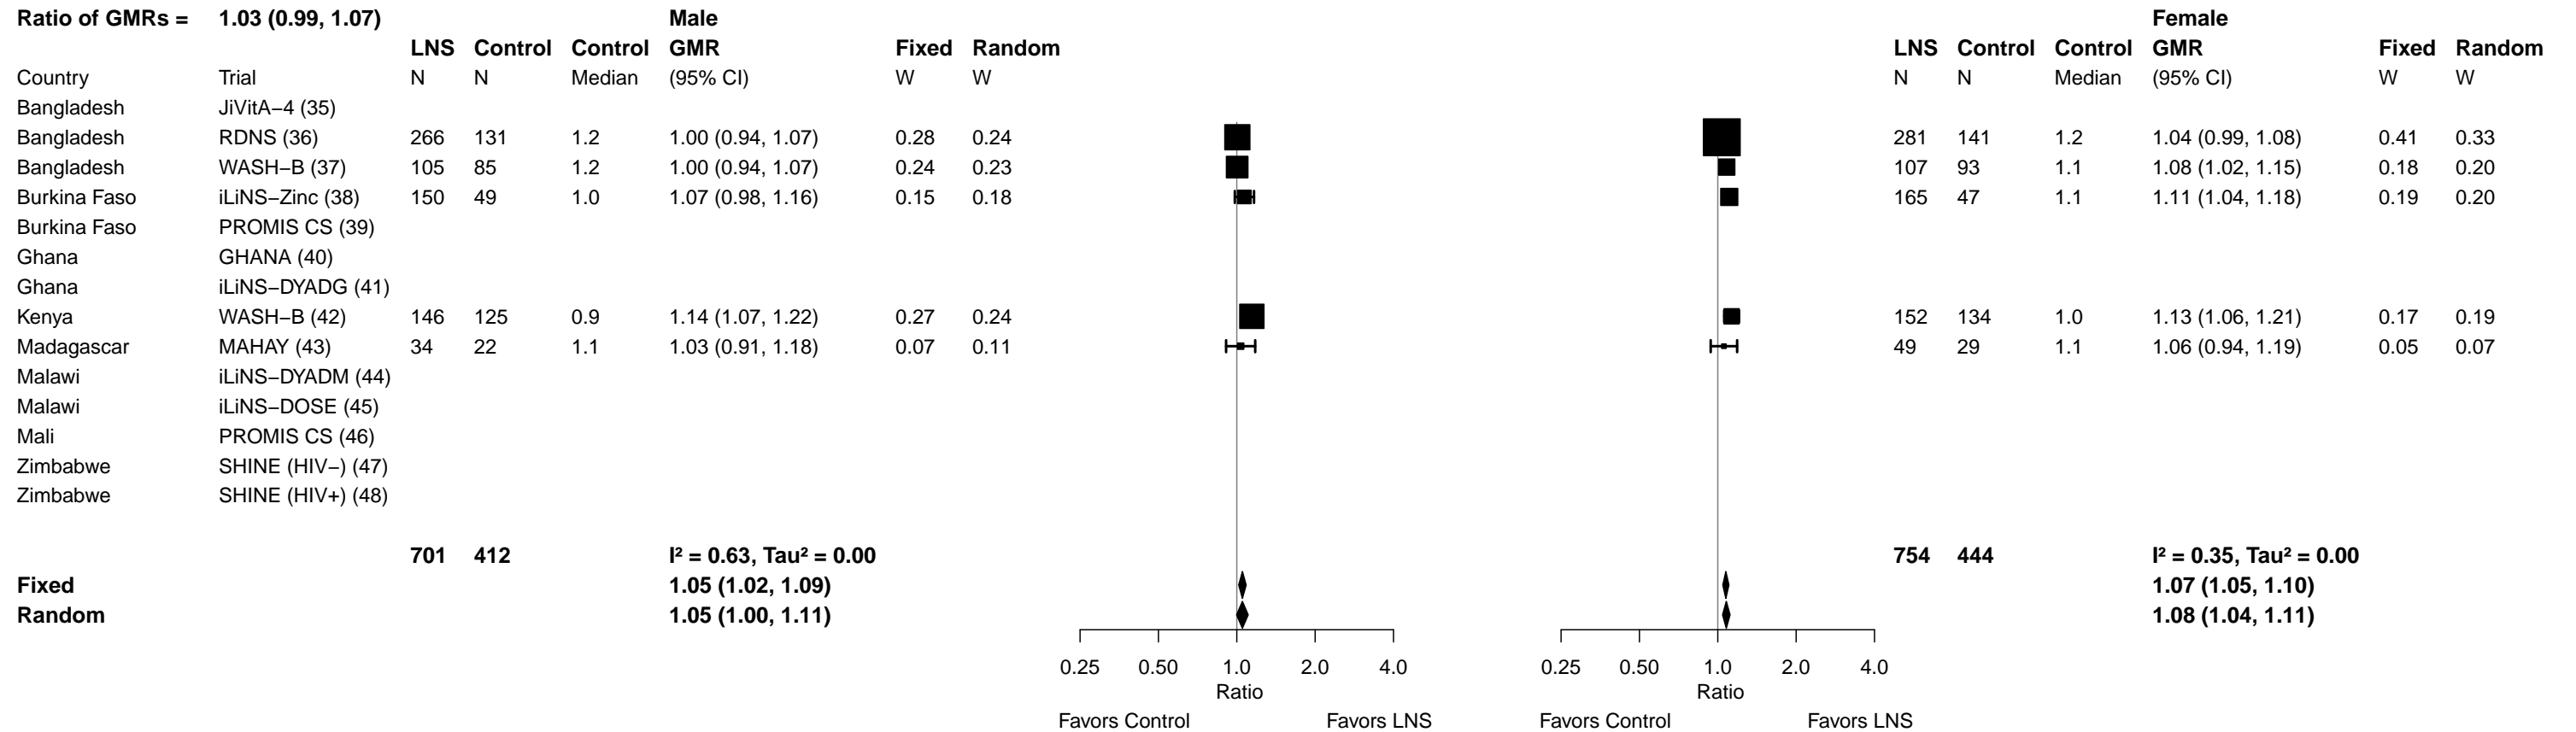

Supplemental figure 6W: Geometric mean ratio of retinol binding protein concentration

6W5: Stratified by Child birth order

**P-for-interaction = 0.353**  
**Ratio of GMRs = 0.98 (0.93, 1.03)**

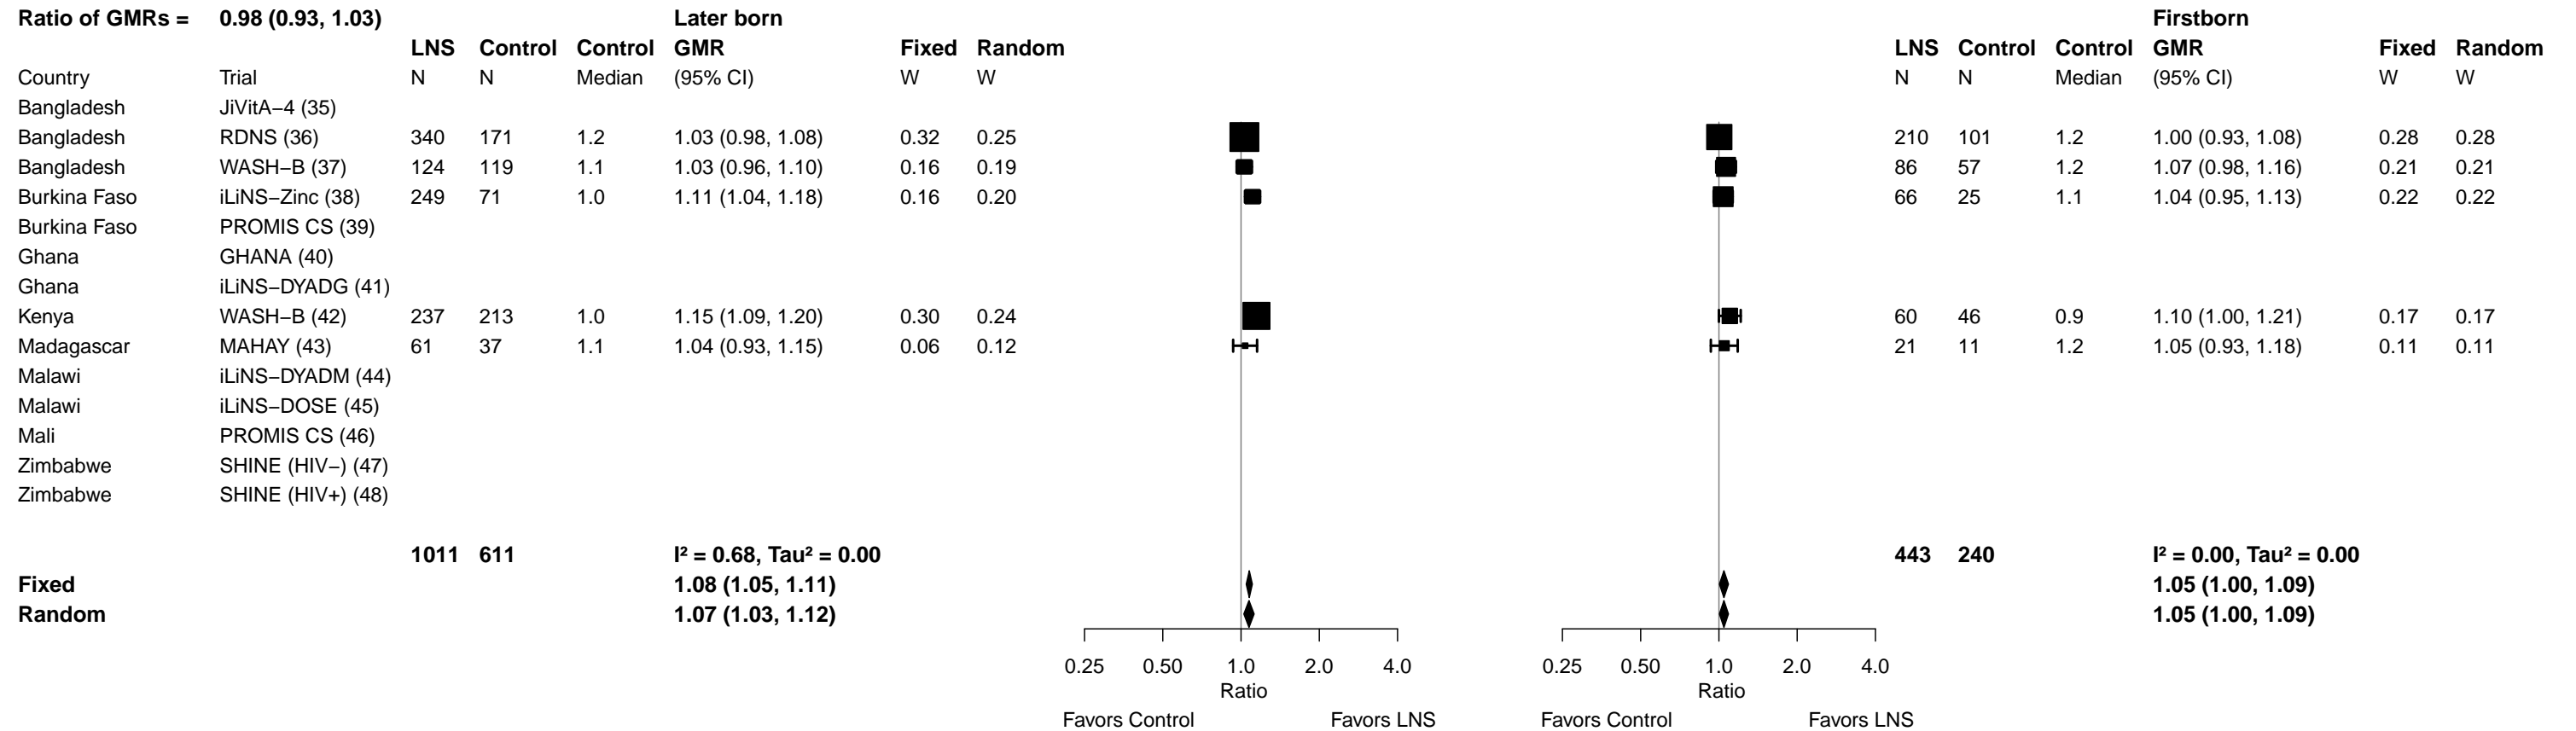



**Supplemental figure 6W: Geometric mean ratio of retinol binding protein concentration**

**6W6: Stratified by Child baseline acute malnutrition (insufficient comparisons)**

**Supplemental figure 6W: Geometric mean ratio of retinol binding protein concentration**

**6W7: Stratified by Child baseline anemia (insufficient comparisons)**

Supplemental figure 6W: Geometric mean ratio of retinol binding protein concentration

6W8: Stratified by Child high-dose vitamin A supplementation

**P-for-interaction = 0.107**  
**Ratio of GMRs = 0.94 (0.88, 1.01)**

| Country       | Trial             | LNS<br>N   | Control<br>N | Control<br>Median                                   | Received VitA<br>GMR<br>(95% CI) | Fixed Random |      |
|---------------|-------------------|------------|--------------|-----------------------------------------------------|----------------------------------|--------------|------|
|               |                   |            |              |                                                     |                                  | W            | W    |
| Bangladesh    | JiVitA-4 (35)     |            |              |                                                     |                                  |              |      |
| Bangladesh    | RDNS (36)         | 444        | 223          | 1.2                                                 | 1.02 (0.97, 1.06)                | 0.80         | 0.40 |
| Bangladesh    | WASH-B (37)       | 16         | 16           | 1.0                                                 | 1.21 (1.07, 1.37)                | 0.11         | 0.31 |
| Burkina Faso  | iLiNS-Zinc (38)   |            |              |                                                     |                                  |              |      |
| Burkina Faso  | PROMIS CS (39)    |            |              |                                                     |                                  |              |      |
| Ghana         | GHANA (40)        |            |              |                                                     |                                  |              |      |
| Ghana         | iLiNS-DYADG (41)  |            |              |                                                     |                                  |              |      |
| Kenya         | WASH-B (42)       | 26         | 31           | 0.9                                                 | 1.24 (1.08, 1.42)                | 0.09         | 0.29 |
| Madagascar    | MAHAY (43)        |            |              |                                                     |                                  |              |      |
| Malawi        | iLiNS-DYADM (44)  |            |              |                                                     |                                  |              |      |
| Malawi        | iLiNS-DOSE (45)   |            |              |                                                     |                                  |              |      |
| Mali          | PROMIS CS (46)    |            |              |                                                     |                                  |              |      |
| Zimbabwe      | SHINE (HIV-) (47) |            |              |                                                     |                                  |              |      |
| Zimbabwe      | SHINE (HIV+) (48) |            |              |                                                     |                                  |              |      |
|               |                   | <b>486</b> | <b>270</b>   |                                                     |                                  |              |      |
|               |                   |            |              | <b>I<sup>2</sup> = 0.85, Tau<sup>2</sup> = 0.01</b> |                                  |              |      |
| <b>Fixed</b>  |                   |            |              | <b>1.05 (1.01, 1.10)</b>                            |                                  |              |      |
| <b>Random</b> |                   |            |              | <b>1.14 (1.00, 1.29)</b>                            |                                  |              |      |

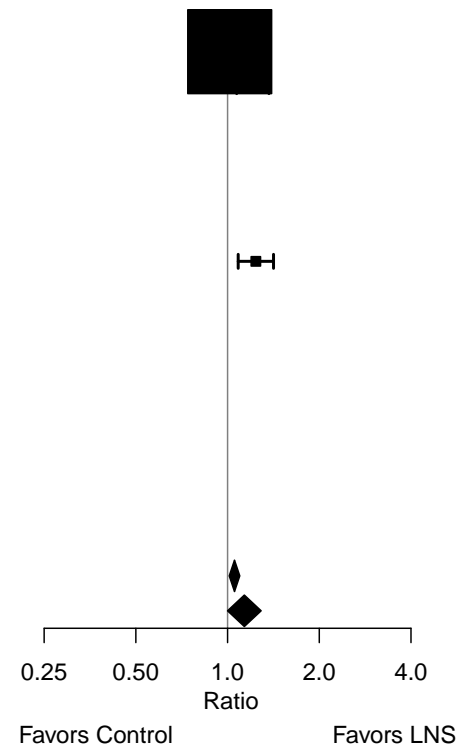

| Country       | Trial             | LNS<br>N   | Control<br>N | Control<br>Median                                   | Not treated<br>GMR<br>(95% CI) | Fixed Random |      |
|---------------|-------------------|------------|--------------|-----------------------------------------------------|--------------------------------|--------------|------|
|               |                   |            |              |                                                     |                                | W            | W    |
| Bangladesh    | RDNS (36)         | 105        | 49           | 1.2                                                 | 1.04 (0.94, 1.14)              | 0.22         | 0.34 |
| Bangladesh    | WASH-B (37)       | 15         | 9            | 1.2                                                 | 0.91 (0.79, 1.06)              | 0.09         | 0.24 |
| Burkina Faso  | iLiNS-Zinc (38)   |            |              |                                                     |                                |              |      |
| Burkina Faso  | PROMIS CS (39)    |            |              |                                                     |                                |              |      |
| Ghana         | GHANA (40)        |            |              |                                                     |                                |              |      |
| Ghana         | iLiNS-DYADG (41)  |            |              |                                                     |                                |              |      |
| Kenya         | WASH-B (42)       | 223        | 180          | 1.0                                                 | 1.11 (1.05, 1.17)              | 0.69         | 0.42 |
| Madagascar    | MAHAY (43)        |            |              |                                                     |                                |              |      |
| Malawi        | iLiNS-DYADM (44)  |            |              |                                                     |                                |              |      |
| Malawi        | iLiNS-DOSE (45)   |            |              |                                                     |                                |              |      |
| Mali          | PROMIS CS (46)    |            |              |                                                     |                                |              |      |
| Zimbabwe      | SHINE (HIV-) (47) |            |              |                                                     |                                |              |      |
| Zimbabwe      | SHINE (HIV+) (48) |            |              |                                                     |                                |              |      |
|               |                   | <b>343</b> | <b>238</b>   |                                                     |                                |              |      |
|               |                   |            |              | <b>I<sup>2</sup> = 0.69, Tau<sup>2</sup> = 0.01</b> |                                |              |      |
| <b>Fixed</b>  |                   |            |              | <b>1.07 (1.03, 1.12)</b>                            |                                |              |      |
| <b>Random</b> |                   |            |              | <b>1.03 (0.93, 1.15)</b>                            |                                |              |      |

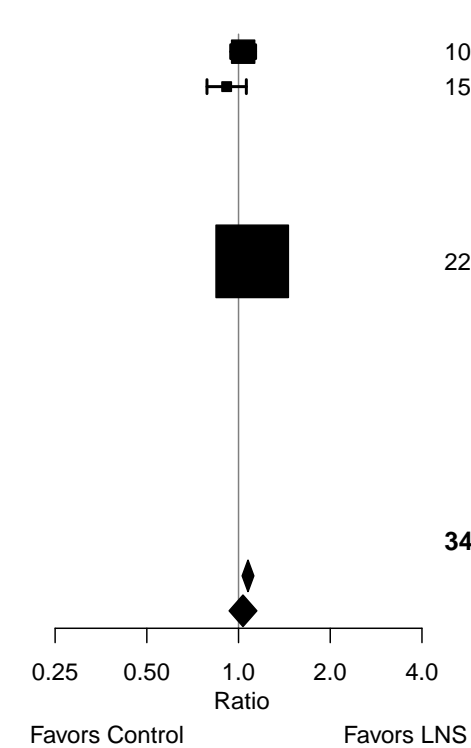

Supplemental figure 6W: Geometric mean ratio of retinol binding protein concentration

6W9: Stratified by Child inflammation

**P-for-interaction = 0.088**  
**Ratio of GMRs = 1.04 (0.99, 1.08)**

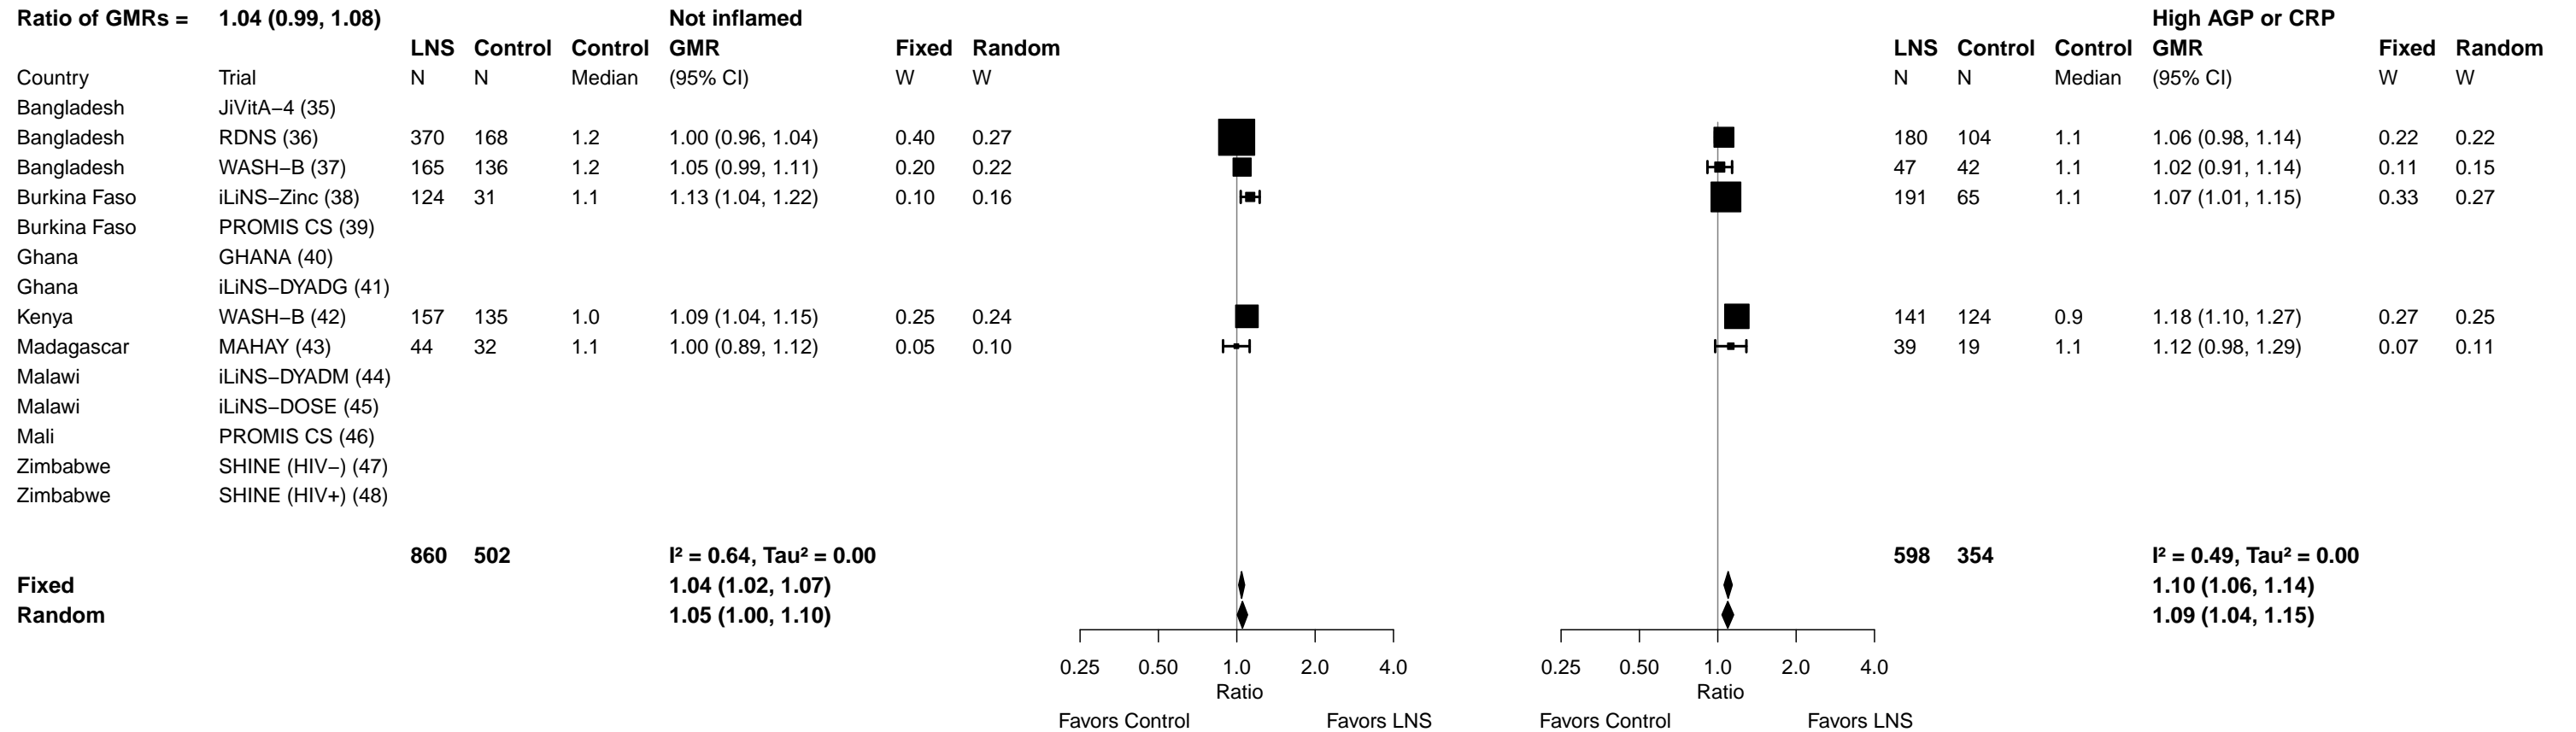

**Supplemental figure 6X: Low vitamin A status (RBP < 0.70 µmol/L) prevalence ratio**

**6X1: Stratified by Maternal BMI (insufficient comparisons)**

**Supplemental figure 6X: Low vitamin A status (RBP < 0.70  $\mu\text{mol/L}$ ) prevalence ratio**

**6X2: Stratified by Maternal age (insufficient comparisons)**

**Supplemental figure 6X: Low vitamin A status (RBP < 0.70  $\mu\text{mol/L}$ ) prevalence ratio**

**6X3: Stratified by Maternal education (insufficient comparisons)**

**Supplemental figure 6X: Low vitamin A status (RBP < 0.70  $\mu\text{mol/L}$ ) prevalence ratio**

**6X4: Stratified by Child sex (insufficient comparisons)**



**Supplemental figure 6X: Low vitamin A status (RBP < 0.70  $\mu\text{mol/L}$ ) prevalence ratio**

**6X5: Stratified by Child birth order (insufficient comparisons)**

**Supplemental figure 6X: Low vitamin A status (RBP < 0.70  $\mu\text{mol/L}$ ) prevalence ratio**

**6X6: Stratified by Child baseline acute malnutrition (insufficient comparisons)**

**Supplemental figure 6X: Low vitamin A status (RBP < 0.70  $\mu\text{mol/L}$ ) prevalence ratio**

**6X7: Stratified by Child baseline anemia (insufficient comparisons)**

**Supplemental figure 6X: Low vitamin A status (RBP < 0.70  $\mu\text{mol/L}$ ) prevalence ratio**

**6X8: Stratified by Child high-dose vitamin A supplementation (insufficient comparisons)**

**Supplemental figure 6X: Low vitamin A status (RBP < 0.70  $\mu\text{mol/L}$ ) prevalence ratio**

**6X9: Stratified by Child inflammation (insufficient comparisons)**

**Supplemental figure 6Y: Low vitamin A status (RBP < 0.70 µmol/L) prevalence difference**

**6Y1: Stratified by Maternal BMI (insufficient comparisons)**

**Supplemental figure 6Y: Low vitamin A status (RBP < 0.70  $\mu\text{mol/L}$ ) prevalence difference**

**6Y2: Stratified by Maternal age (insufficient comparisons)**

**Supplemental figure 6Y: Low vitamin A status (RBP < 0.70  $\mu\text{mol/L}$ ) prevalence difference**

**6Y3: Stratified by Maternal education (insufficient comparisons)**



**Supplemental figure 6Y: Low vitamin A status (RBP < 0.70  $\mu\text{mol/L}$ ) prevalence difference**

**6Y4: Stratified by Child sex (insufficient comparisons)**

**Supplemental figure 6Y: Low vitamin A status (RBP < 0.70  $\mu\text{mol/L}$ ) prevalence difference**

**6Y5: Stratified by Child birth order (insufficient comparisons)**

**Supplemental figure 6Y: Low vitamin A status (RBP < 0.70  $\mu\text{mol/L}$ ) prevalence difference**

**6Y6: Stratified by Child baseline acute malnutrition (insufficient comparisons)**

**Supplemental figure 6Y: Low vitamin A status (RBP < 0.70  $\mu\text{mol/L}$ ) prevalence difference**

**6Y7: Stratified by Child baseline anemia (insufficient comparisons)**

**Supplemental figure 6Y: Low vitamin A status (RBP < 0.70  $\mu\text{mol/L}$ ) prevalence difference**

**6Y8: Stratified by Child high-dose vitamin A supplementation (insufficient comparisons)**

**Supplemental figure 6Y: Low vitamin A status (RBP < 0.70  $\mu\text{mol/L}$ ) prevalence difference**

**6Y9: Stratified by Child inflammation (insufficient comparisons)**

### Supplemental figure 6Z: Marginal vitamin A status (RBP < 1.05 μmol/L) prevalence ratio

#### 6Z1: Stratified by Maternal BMI

P-for-interaction = 0.327

Ratio of PRs = 1.13 (0.89, 1.43)

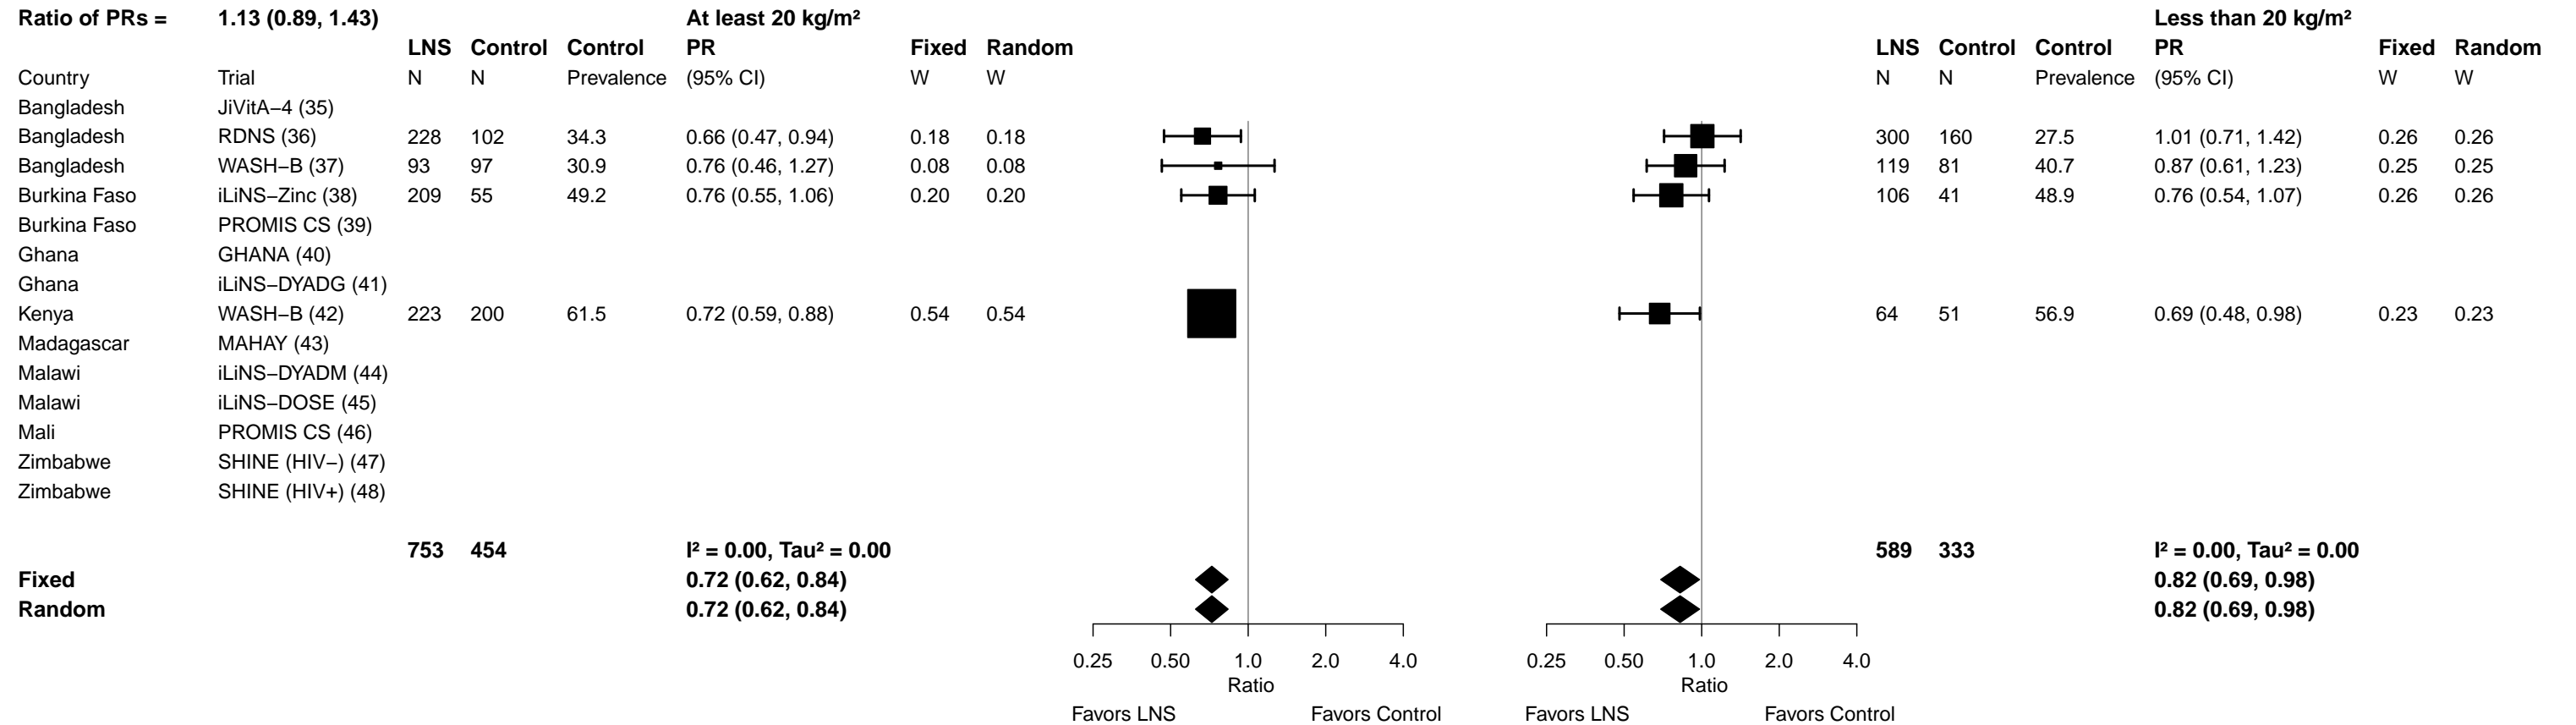

Supplemental figure 6Z: Marginal vitamin A status (RBP < 1.05 µmol/L) prevalence ratio

6Z2: Stratified by Maternal age

P-for-interaction = 0.255

Ratio of PRs = 0.89 (0.72, 1.09)

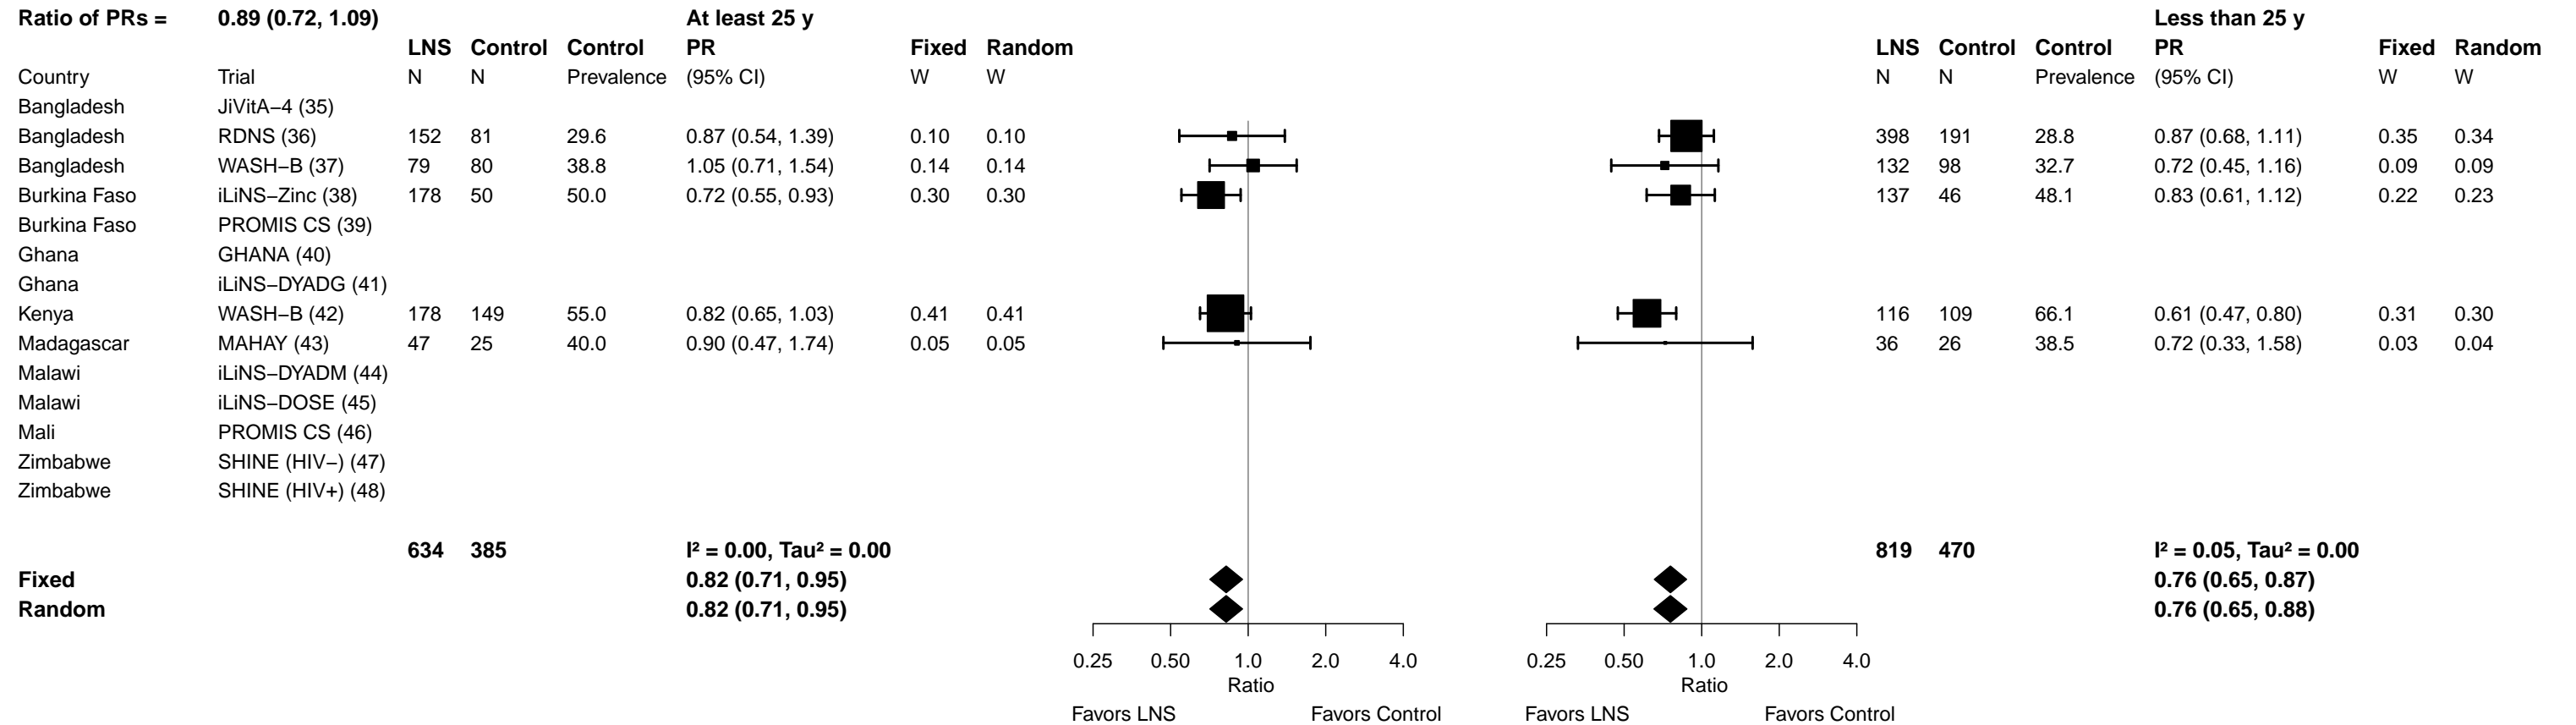





Supplemental figure 6Z: Marginal vitamin A status (RBP < 1.05 µmol/L) prevalence ratio

6Z4: Stratified by Child sex

**P-for-interaction = 0.345**  
**Ratio of PRs = 0.91 (0.74, 1.11)**

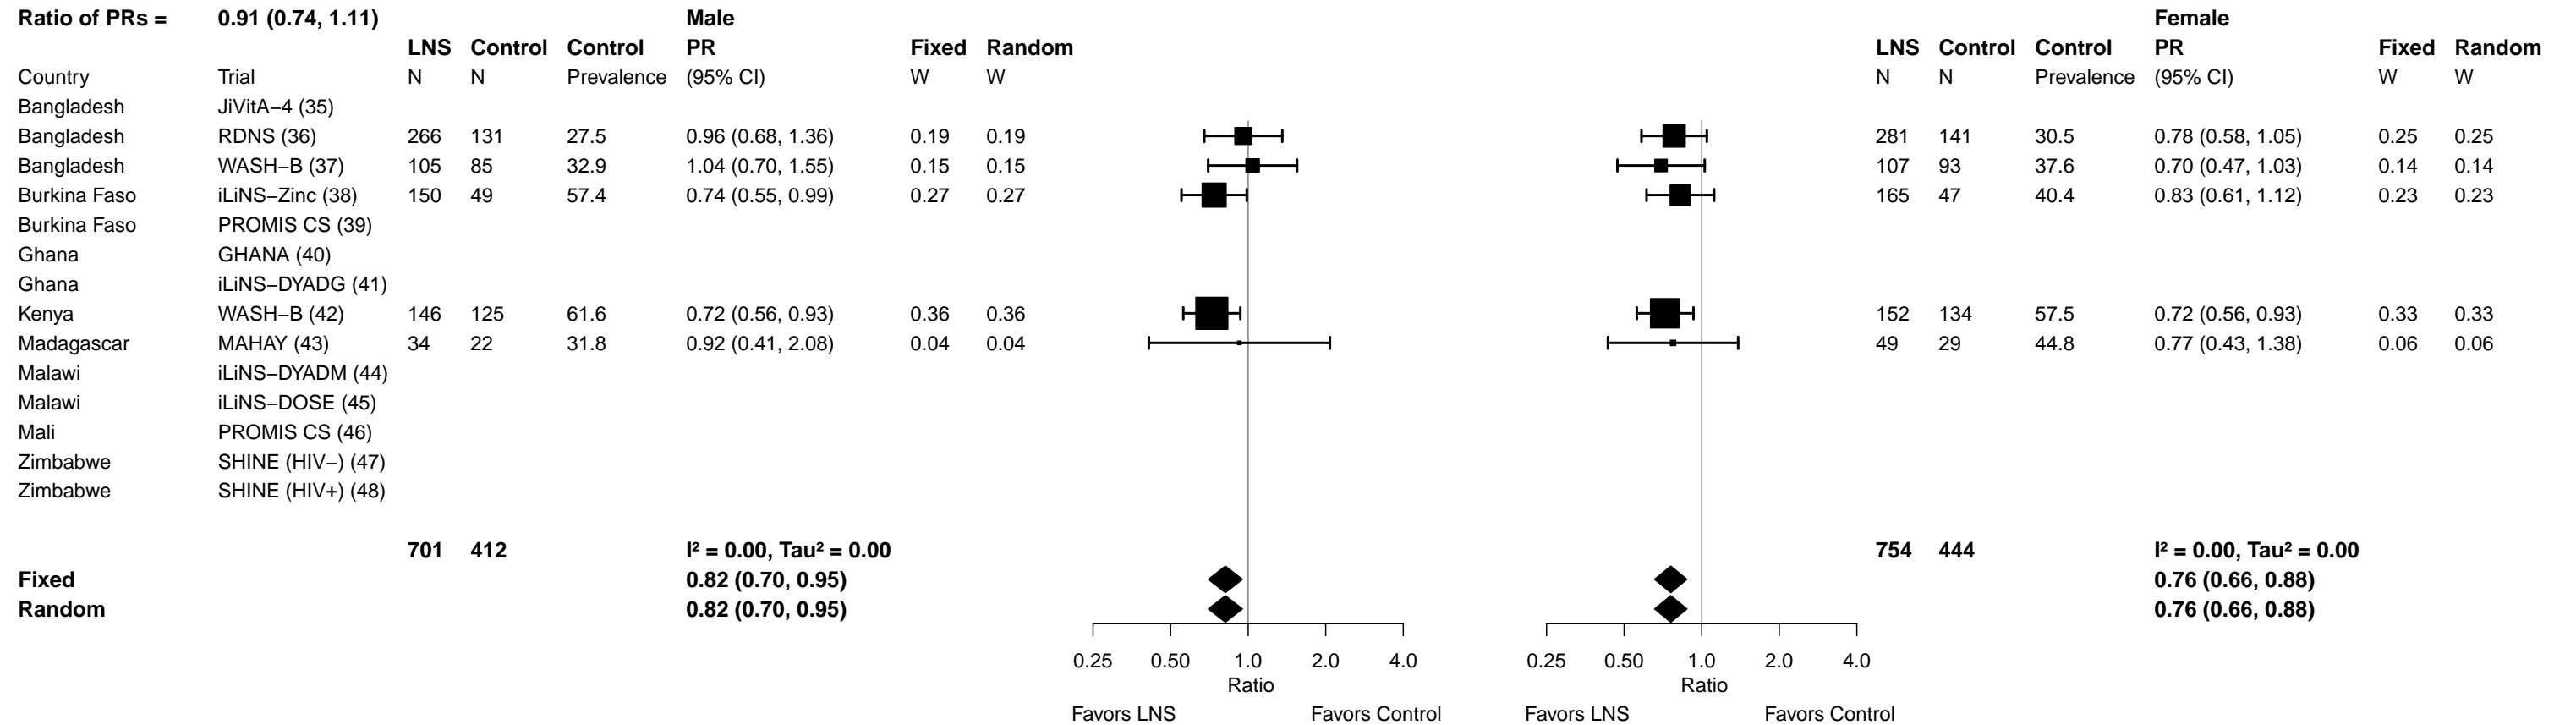

Supplemental figure 6Z: Marginal vitamin A status (RBP < 1.05 µmol/L) prevalence ratio

6Z5: Stratified by Child birth order

P-for-interaction = 0.310

Ratio of PRs = 1.13 (0.89, 1.44)

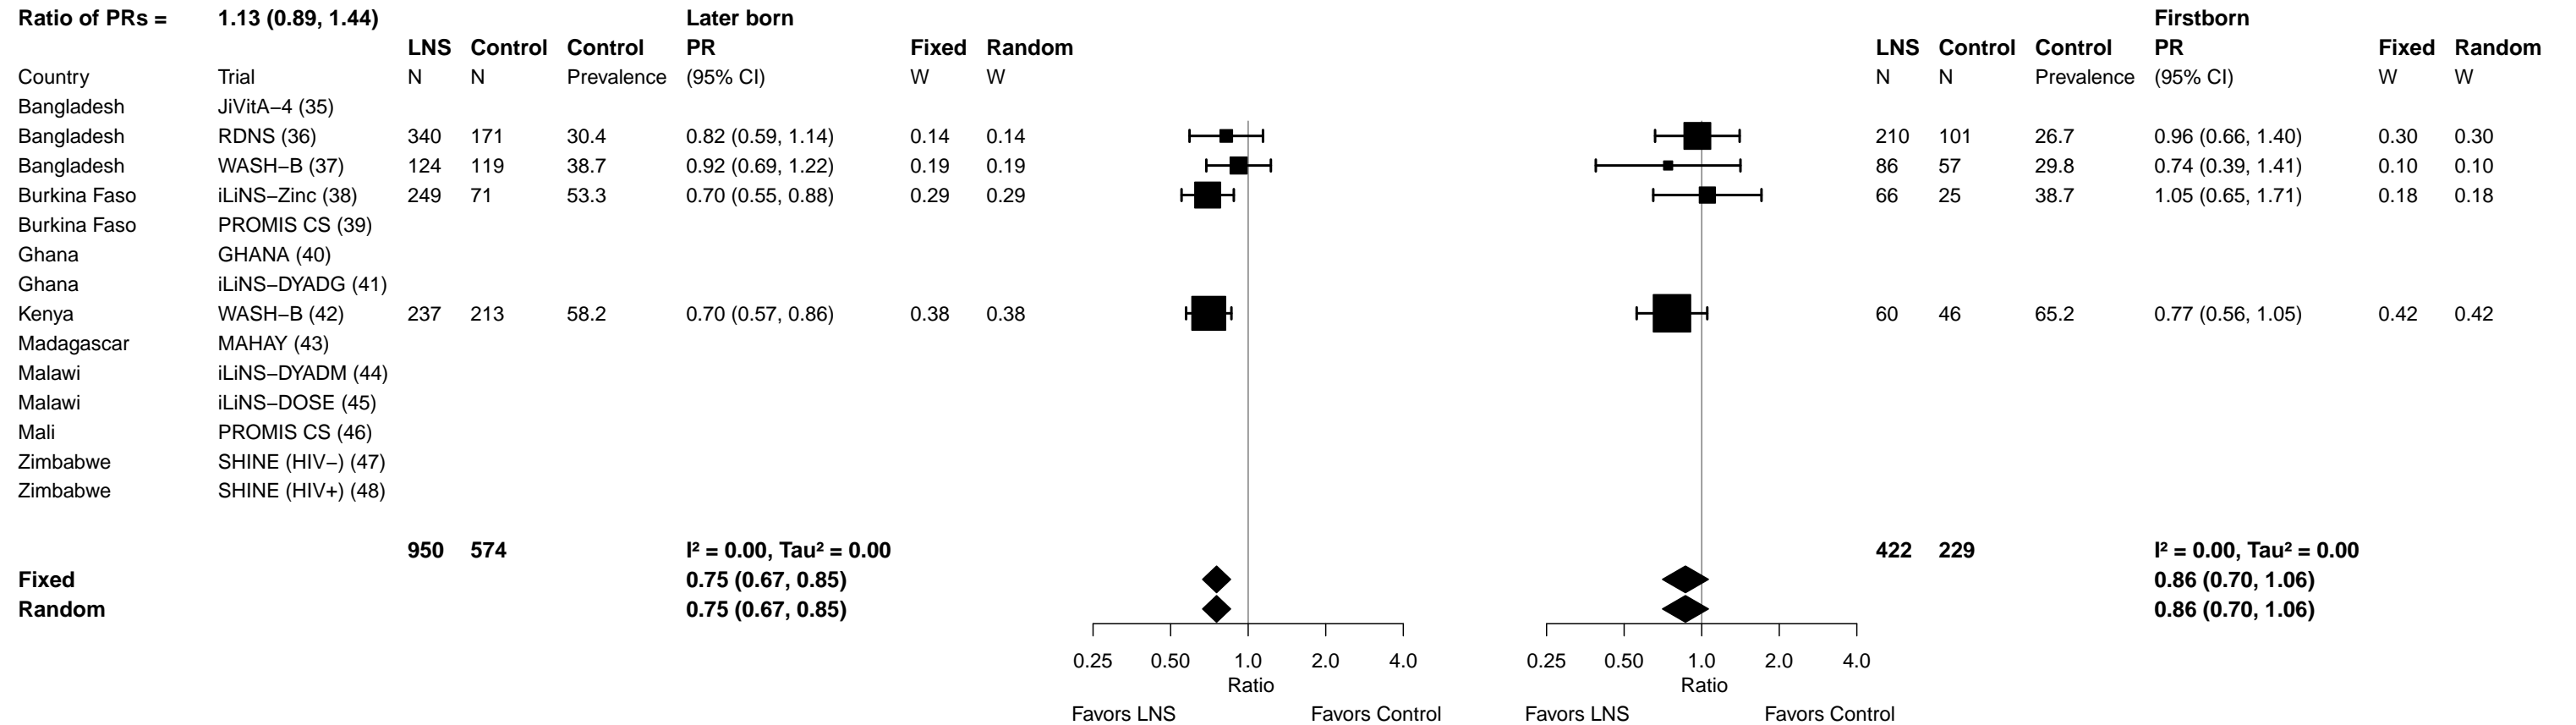

Supplemental figure 6Z: Marginal vitamin A status (RBP < 1.05  $\mu\text{mol/L}$ ) prevalence ratio

6Z6: Stratified by Child baseline acute malnutrition (insufficient comparisons)

Supplemental figure 6Z: Marginal vitamin A status (RBP < 1.05  $\mu\text{mol/L}$ ) prevalence ratio

6Z7: Stratified by Child baseline anemia (insufficient comparisons)

Supplemental figure 6Z: Marginal vitamin A status (RBP < 1.05  $\mu\text{mol/L}$ ) prevalence ratio

6Z8: Stratified by Child high-dose vitamin A supplementation (insufficient comparisons)

Supplemental figure 6Z: Marginal vitamin A status (RBP < 1.05 μmol/L) prevalence ratio

6Z9: Stratified by Child inflammation

P-for-interaction = 0.223

Ratio of PRs = 0.87 (0.69, 1.09)

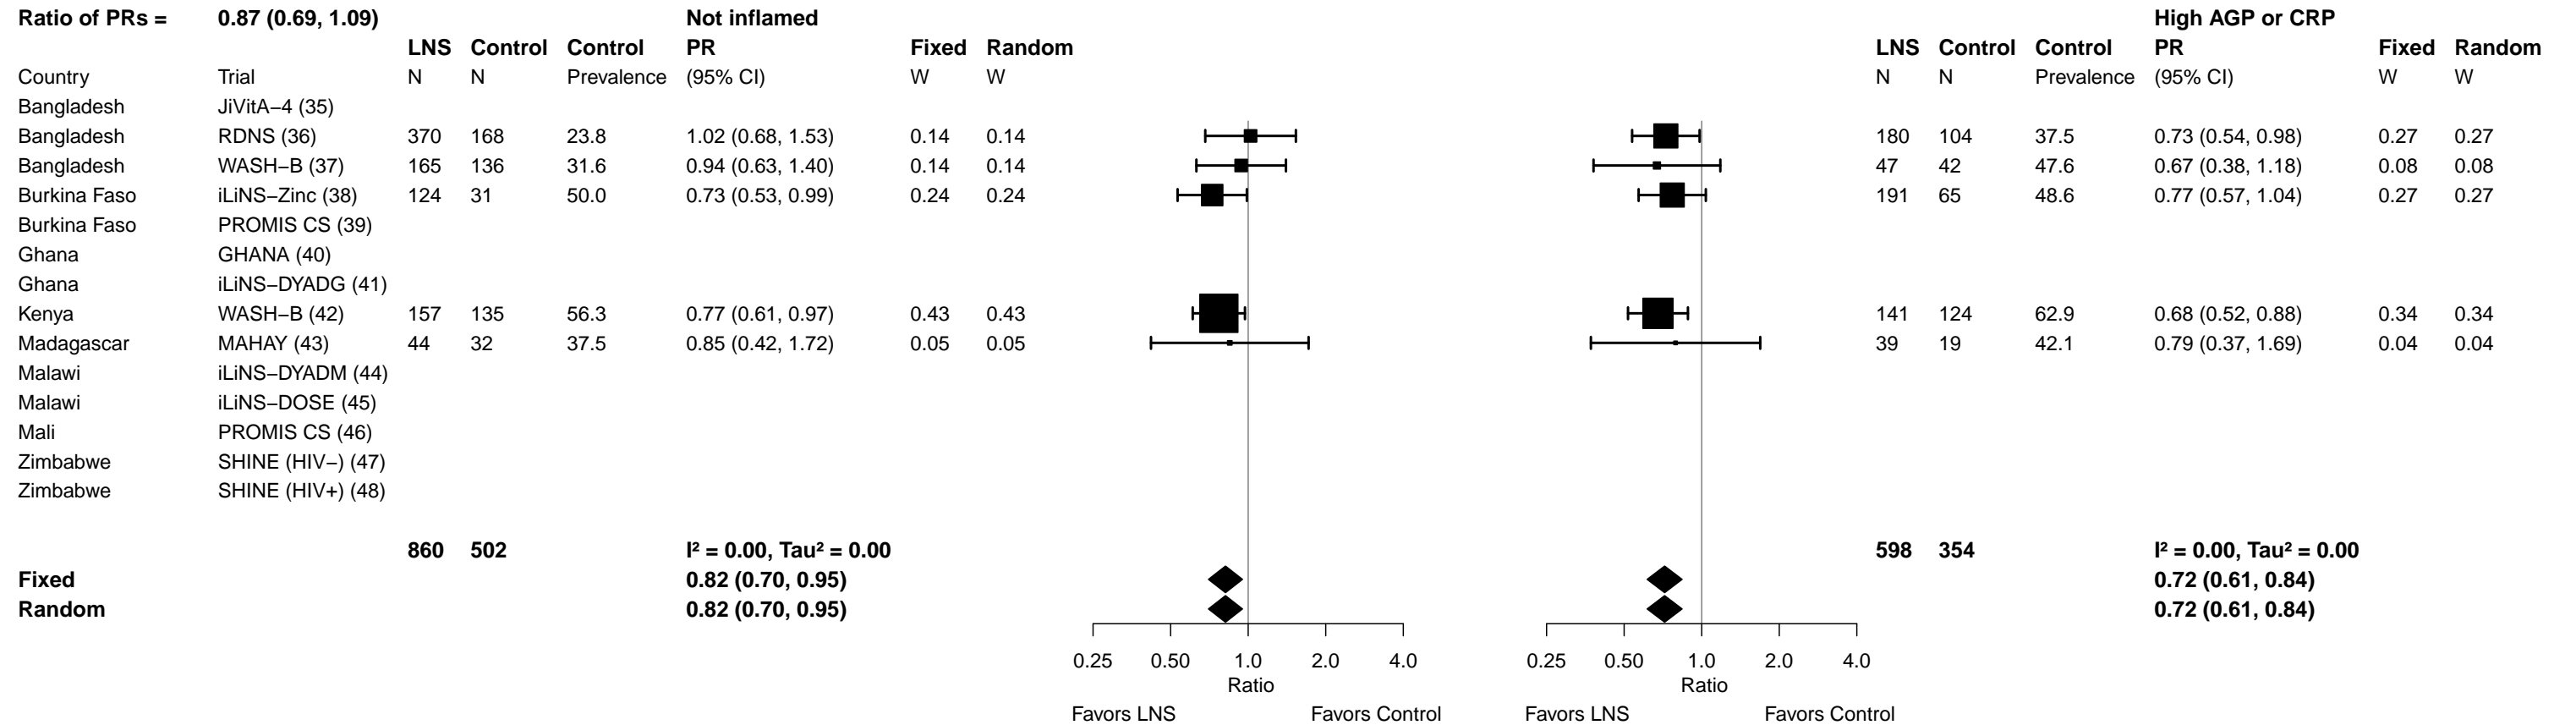

### Supplemental figure 6AA: Marginal vitamin A status (RBP < 1.05 μmol/L) prevalence difference

#### 6AA1: Stratified by Maternal BMI

P-for-interaction = 0.234

Difference in PDs = 0.05 (-0.04, 0.14)

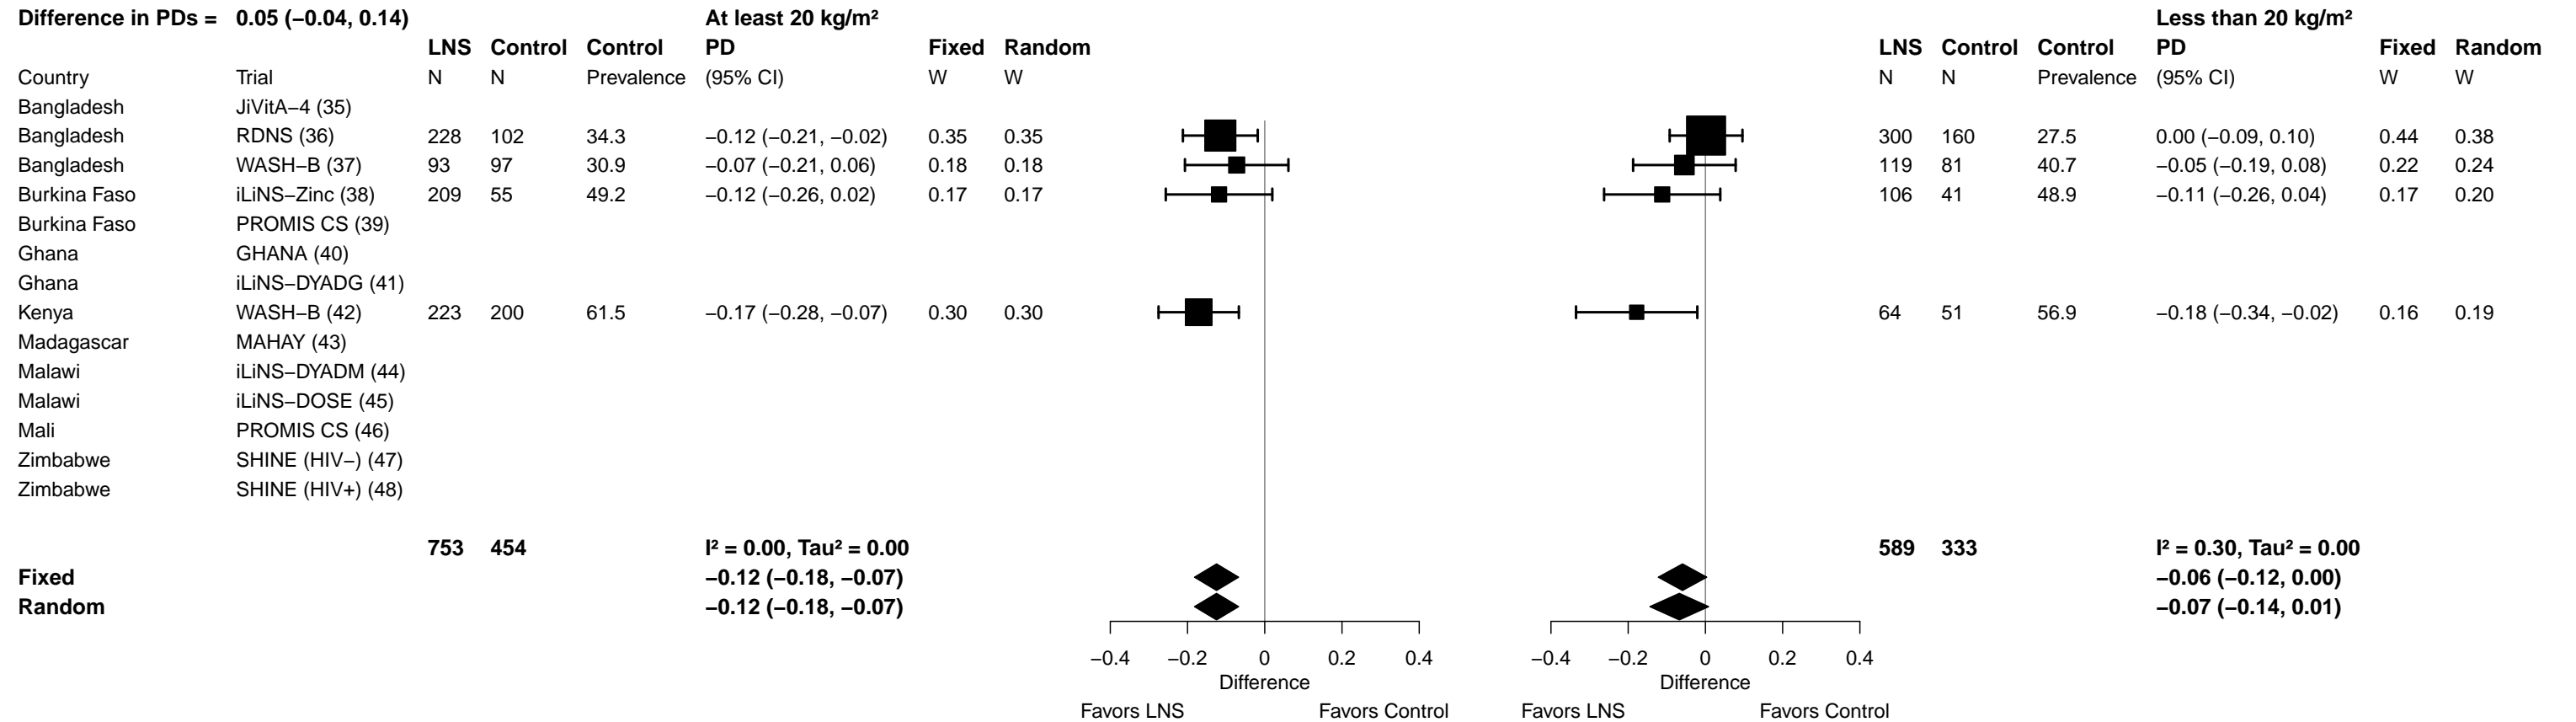



Supplemental figure 6AA: Marginal vitamin A status (RBP < 1.05 µmol/L) prevalence difference

6AA2: Stratified by Maternal age

P-for-interaction = 0.217

Difference in PDs = -0.05 (-0.14, 0.03)

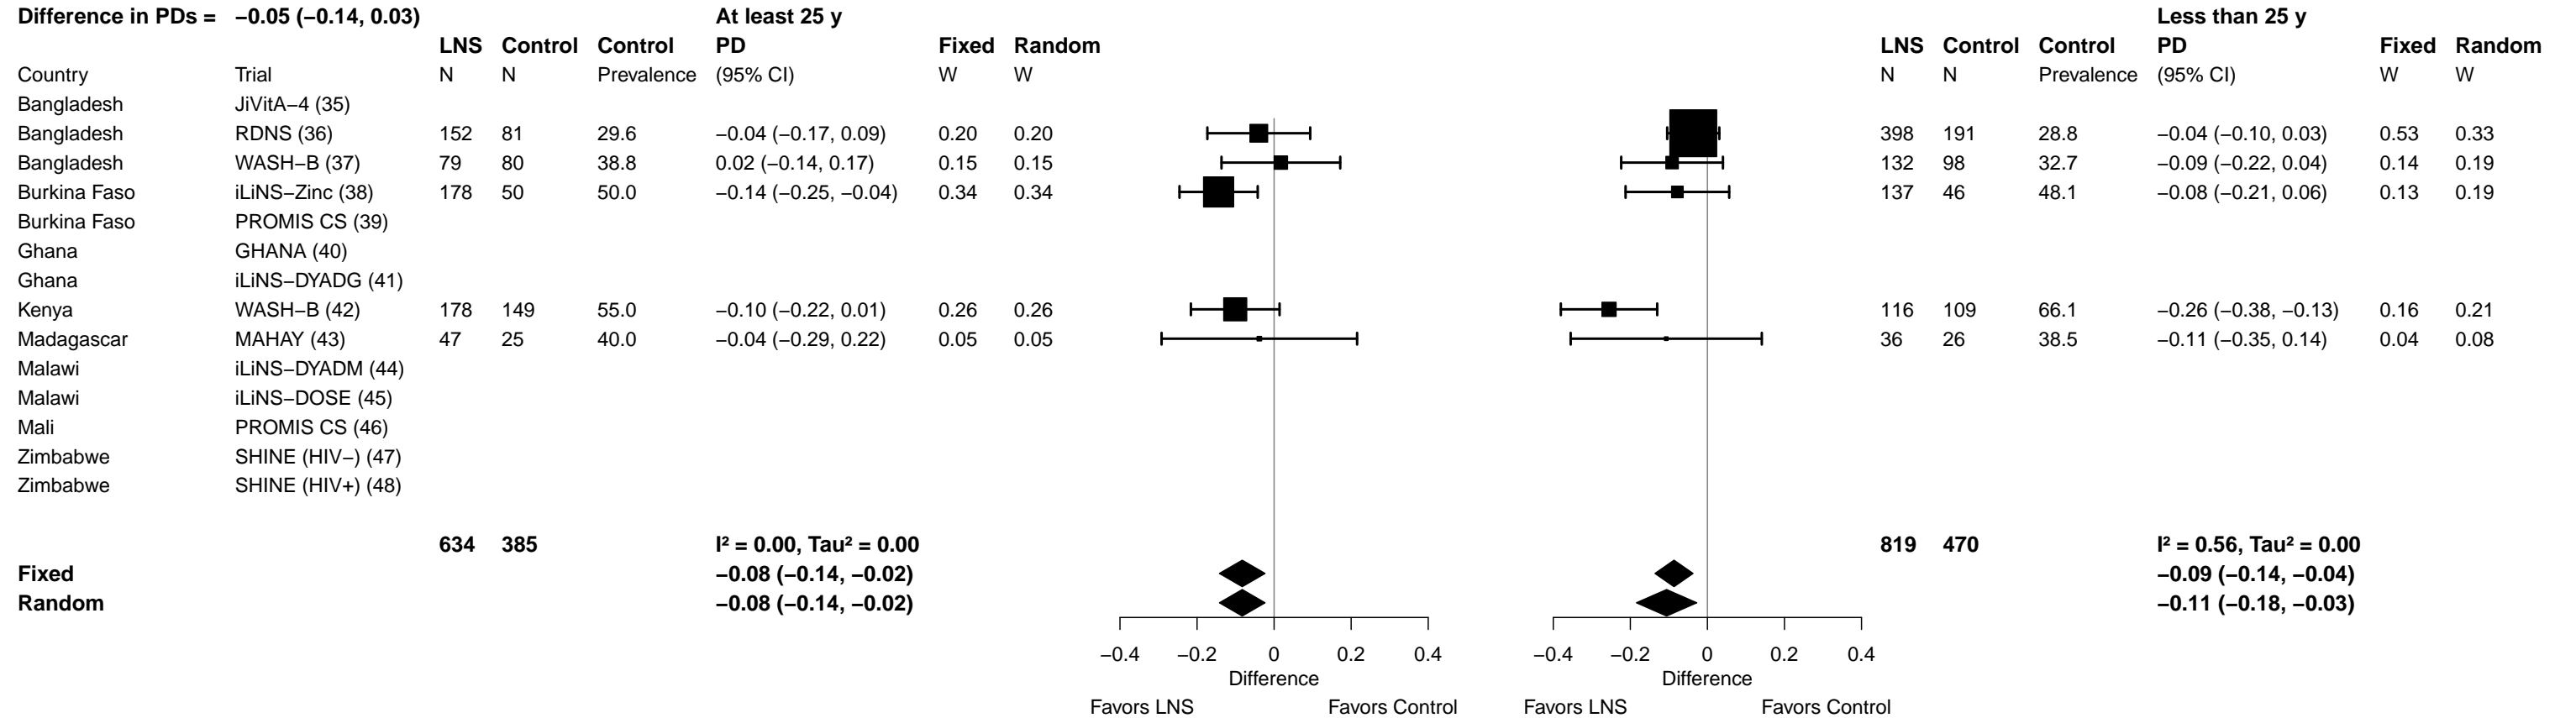

Supplemental figure 6AA: Marginal vitamin A status (RBP < 1.05 µmol/L) prevalence difference

6AA3: Stratified by Maternal education

P-for-interaction = 0.974

Difference in PDs = 0.00 (-0.10, 0.10)

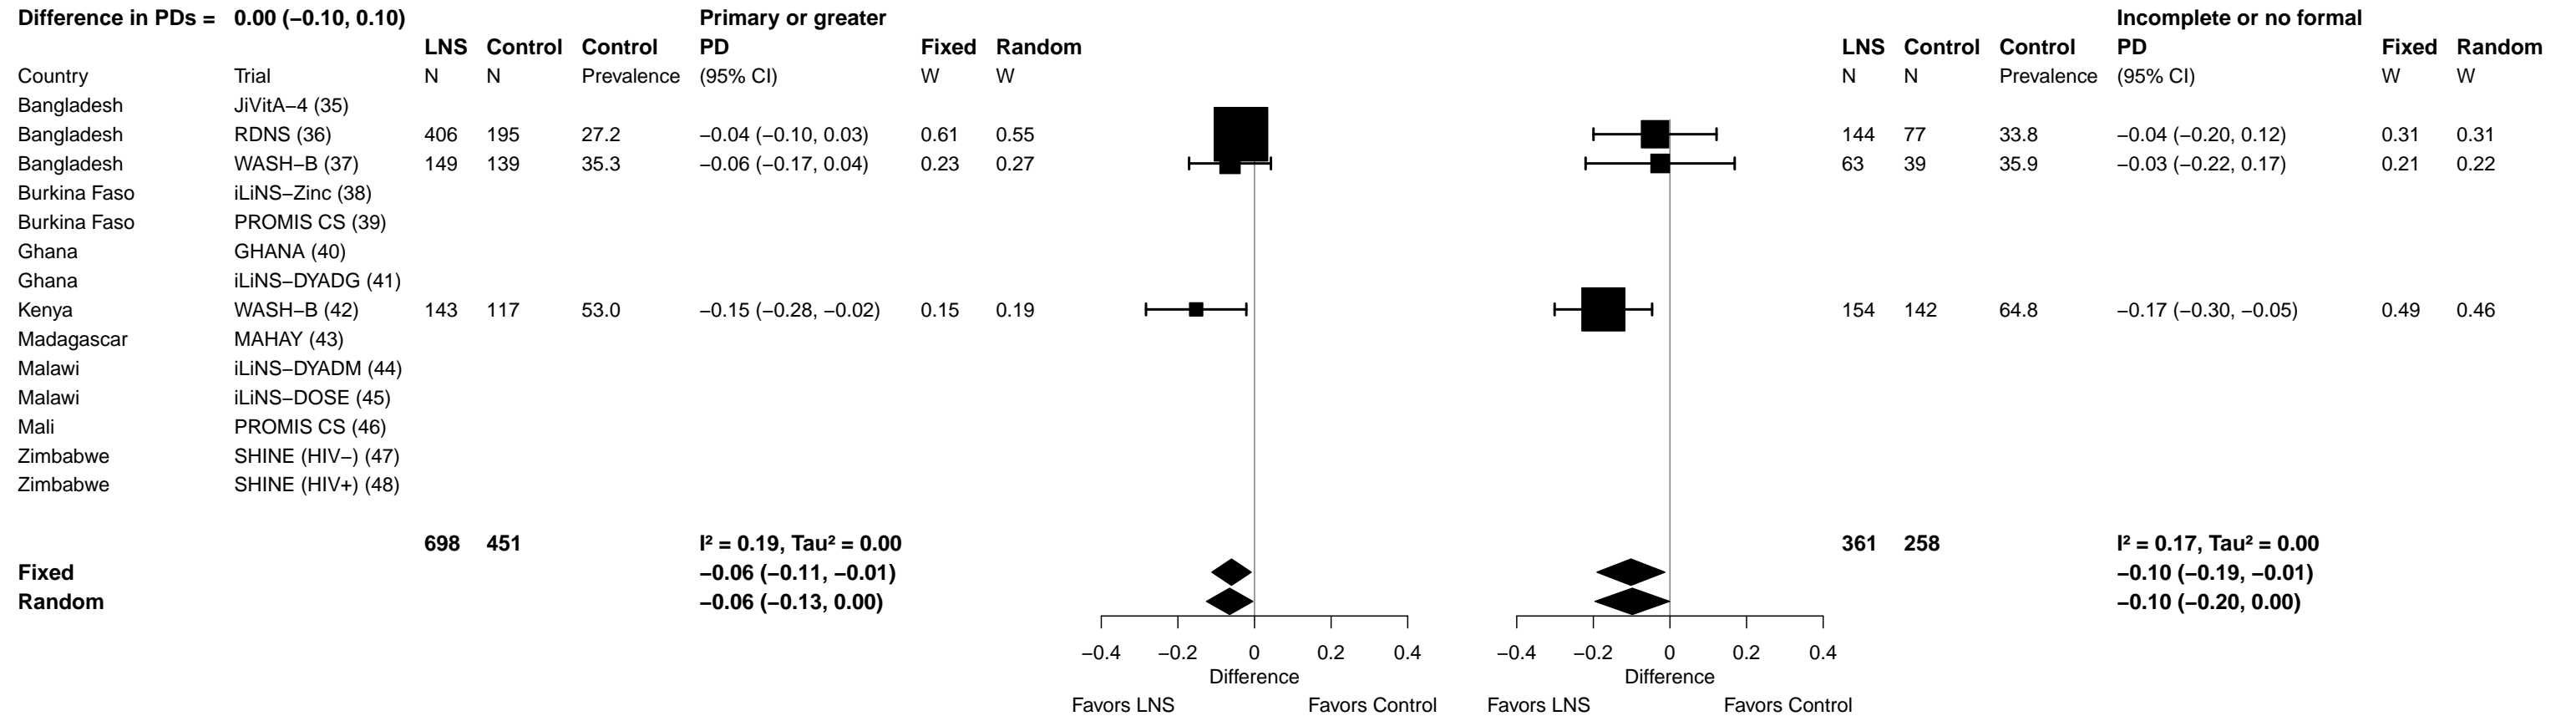



Supplemental figure 6AA: Marginal vitamin A status (RBP < 1.05 µmol/L) prevalence difference

6AA5: Stratified by Child birth order

P-for-interaction = 0.410

Difference in PDs = 0.04 (-0.05, 0.13)

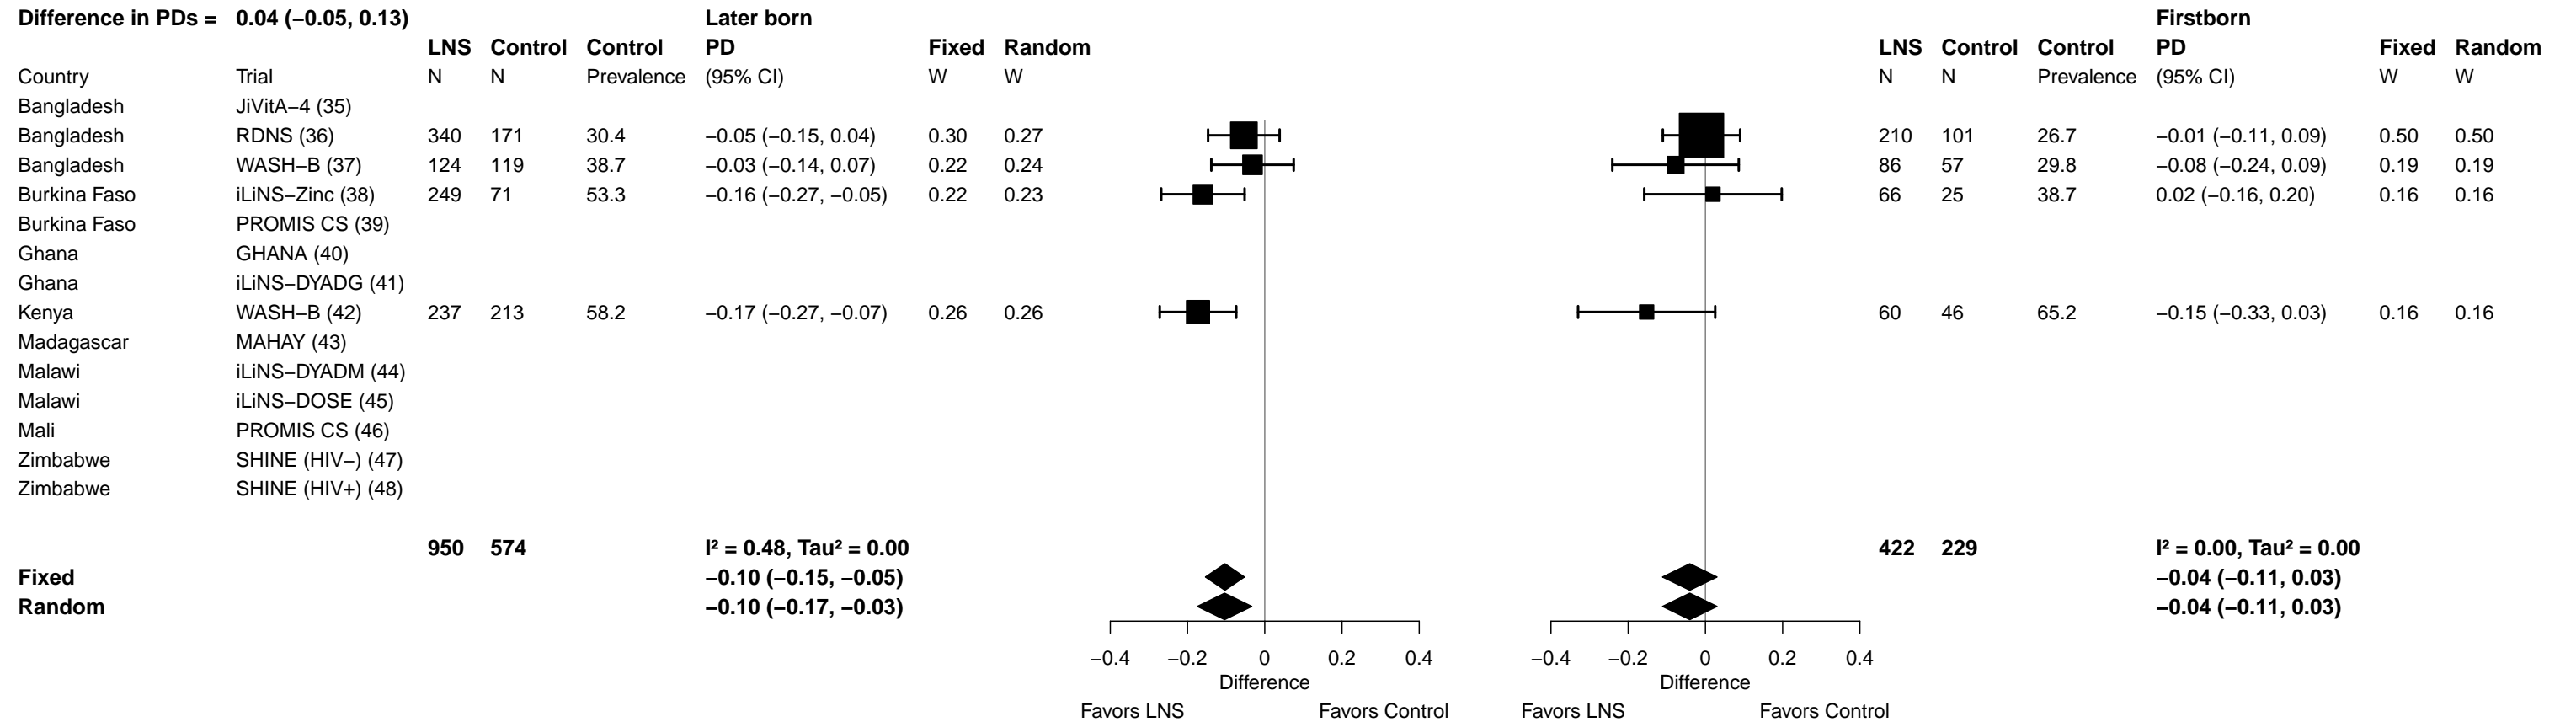

Supplemental figure 6AA: Marginal vitamin A status (RBP < 1.05 µmol/L) prevalence difference

6AA6: Stratified by Child baseline acute malnutrition (insufficient comparisons)

Supplemental figure 6AA: Marginal vitamin A status (RBP < 1.05  $\mu\text{mol/L}$ ) prevalence difference

6AA7: Stratified by Child baseline anemia (insufficient comparisons)

Supplemental figure 6AA: Marginal vitamin A status (RBP < 1.05  $\mu\text{mol/L}$ ) prevalence difference

6AA8: Stratified by Child high-dose vitamin A supplementation (insufficient comparisons)

Supplemental figure 6AA: Marginal vitamin A status (RBP < 1.05 µmol/L) prevalence difference

6AA9: Stratified by Child inflammation

P-for-interaction = 0.080

Difference in PDs = -0.08 (-0.16, 0.01)

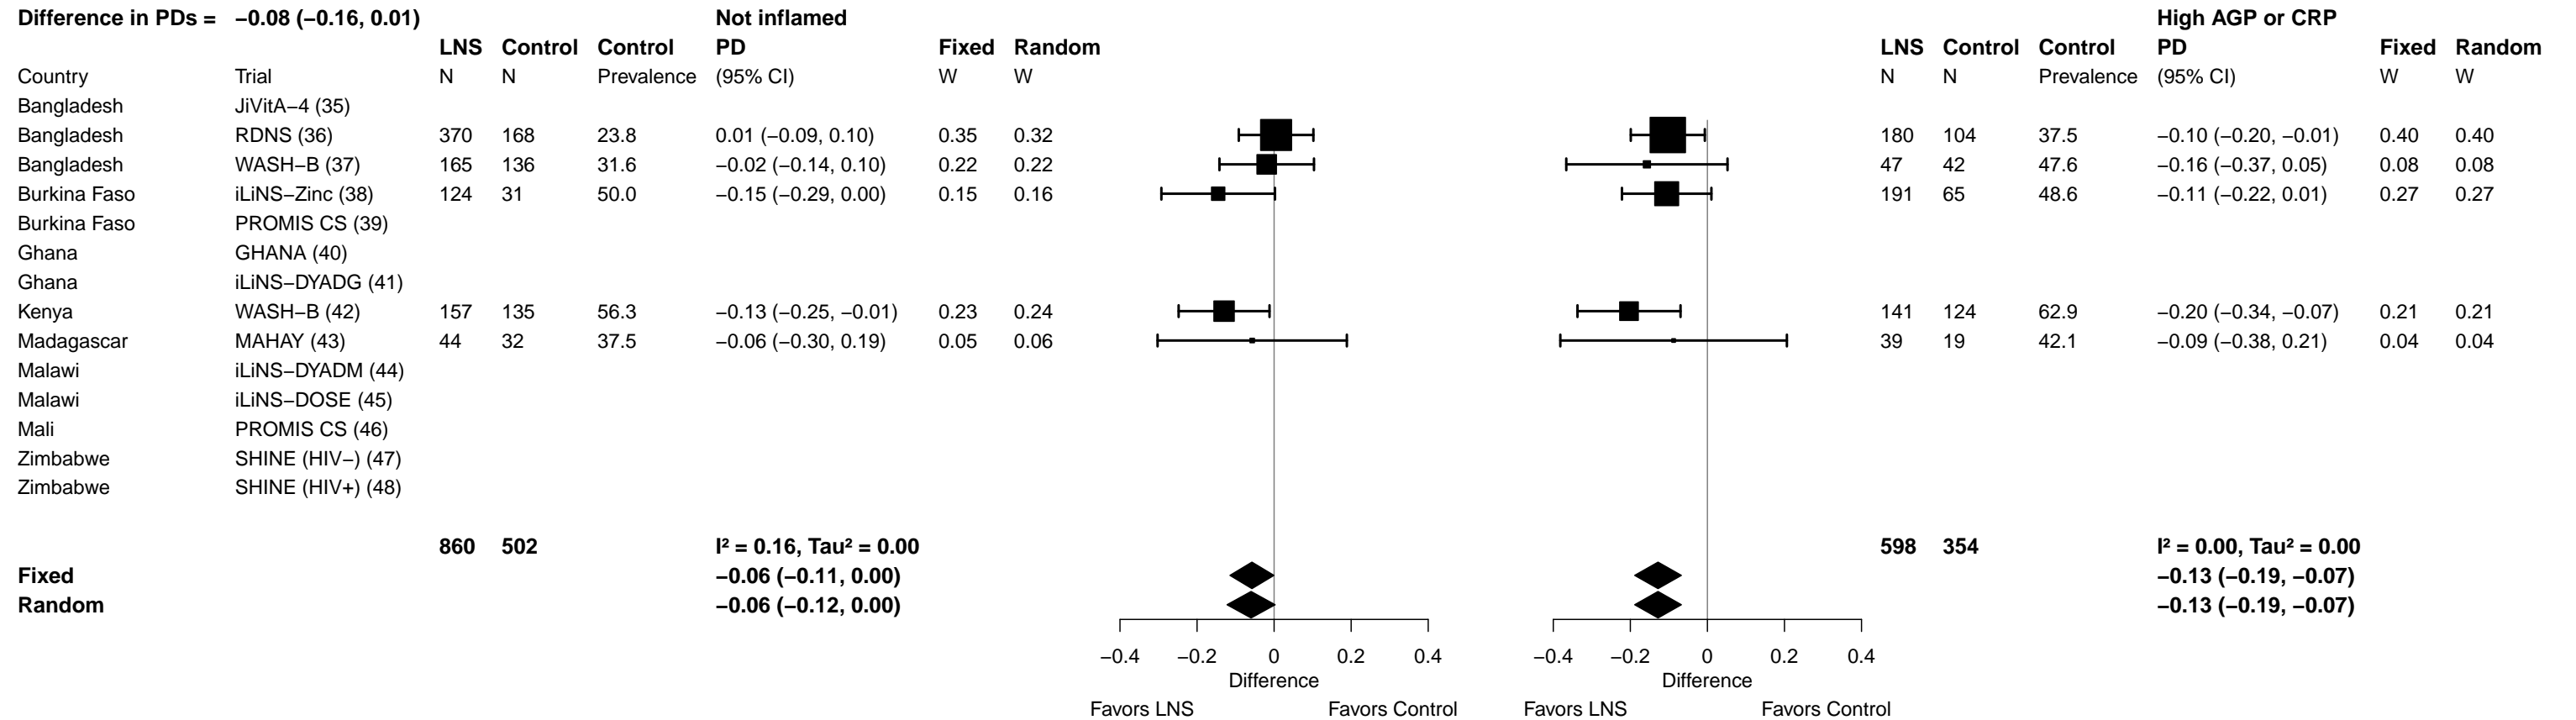



## Supplemental figure 7: Forest plots for effects of SQ-LNS on biochemical outcomes stratified by individual-level household effect modifiers

### Contents

|                                                                                |           |
|--------------------------------------------------------------------------------|-----------|
| <b>Supplemental figure 7A: Mean difference in hemoglobin concentration</b>     | <b>5</b>  |
| 7A1: Stratified by Household socio-economic status . . . . .                   | 5         |
| 7A2: Stratified by Household food insecurity . . . . .                         | 6         |
| 7A3: Stratified by Household source water quality . . . . .                    | 7         |
| 7A4: Stratified by Household sanitation . . . . .                              | 8         |
| 7A5: Stratified by Season at the time of assessment . . . . .                  | 9         |
| <br>                                                                           |           |
| <b>Supplemental figure 7B: Anemia prevalence ratio</b>                         | <b>10</b> |
| 7B1: Stratified by Household socio-economic status . . . . .                   | 10        |
| 7B2: Stratified by Household food insecurity . . . . .                         | 11        |
| 7B3: Stratified by Household source water quality . . . . .                    | 12        |
| 7B4: Stratified by Household sanitation . . . . .                              | 13        |
| 7B5: Stratified by Season at the time of assessment . . . . .                  | 14        |
| <br>                                                                           |           |
| <b>Supplemental figure 7C: Anemia prevalence difference</b>                    | <b>15</b> |
| 7C1: Stratified by Household socio-economic status . . . . .                   | 15        |
| 7C2: Stratified by Household food insecurity . . . . .                         | 16        |
| 7C3: Stratified by Household source water quality . . . . .                    | 17        |
| 7C4: Stratified by Household sanitation . . . . .                              | 18        |
| 7C5: Stratified by Season at the time of assessment . . . . .                  | 19        |
| <br>                                                                           |           |
| <b>Supplemental figure 7D: Moderate-to-severe anemia prevalence ratio</b>      | <b>20</b> |
| 7D1: Stratified by Household socio-economic status . . . . .                   | 20        |
| 7D2: Stratified by Household food insecurity . . . . .                         | 21        |
| 7D3: Stratified by Household source water quality . . . . .                    | 22        |
| 7D4: Stratified by Household sanitation . . . . .                              | 23        |
| 7D5: Stratified by Season at the time of assessment . . . . .                  | 24        |
| <br>                                                                           |           |
| <b>Supplemental figure 7E: Moderate-to-severe anemia prevalence difference</b> | <b>25</b> |
| 7E1: Stratified by Household socio-economic status . . . . .                   | 25        |
| 7E2: Stratified by Household food insecurity . . . . .                         | 26        |
| 7E3: Stratified by Household source water quality . . . . .                    | 27        |
| 7E4: Stratified by Household sanitation . . . . .                              | 28        |
| 7E5: Stratified by Season at the time of assessment . . . . .                  | 29        |
| <br>                                                                           |           |
| <b>Supplemental figure 7F: Geometric mean ratio of ferritin concentration</b>  | <b>30</b> |
| 7F1: Stratified by Household socio-economic status . . . . .                   | 30        |
| 7F2: Stratified by Household food insecurity . . . . .                         | 31        |
| 7F3: Stratified by Household source water quality . . . . .                    | 32        |
| 7F4: Stratified by Household sanitation . . . . .                              | 33        |
| 7F5: Stratified by Season at the time of assessment . . . . .                  | 34        |

|                                                                                                   |           |
|---------------------------------------------------------------------------------------------------|-----------|
| <b>Supplemental figure 7G: Iron deficiency (ferritin &lt; 12 µg/L) prevalence ratio</b>           | <b>35</b> |
| 7G1: Stratified by Household socio-economic status . . . . .                                      | 35        |
| 7G2: Stratified by Household food insecurity . . . . .                                            | 36        |
| 7G3: Stratified by Household source water quality . . . . .                                       | 37        |
| 7G4: Stratified by Household sanitation (insufficient comparisons) . . . . .                      | 38        |
| 7G5: Stratified by Season at the time of assessment . . . . .                                     | 39        |
| <b>Supplemental figure 7H: Iron deficiency (ferritin &lt; 12 µg/L) prevalence difference</b>      | <b>40</b> |
| 7H1: Stratified by Household socio-economic status . . . . .                                      | 40        |
| 7H2: Stratified by Household food insecurity . . . . .                                            | 41        |
| 7H3: Stratified by Household source water quality . . . . .                                       | 42        |
| 7H4: Stratified by Household sanitation (insufficient comparisons) . . . . .                      | 43        |
| 7H5: Stratified by Season at the time of assessment . . . . .                                     | 44        |
| <b>Supplemental figure 7I: Iron deficiency anemia prevalence ratio</b>                            | <b>45</b> |
| 7I1: Stratified by Household socio-economic status . . . . .                                      | 45        |
| 7I2: Stratified by Household food insecurity (insufficient comparisons) . . . . .                 | 46        |
| 7I3: Stratified by Household source water quality (insufficient comparisons) . . . . .            | 47        |
| 7I4: Stratified by Household sanitation (insufficient comparisons) . . . . .                      | 48        |
| 7I5: Stratified by Season at the time of assessment (insufficient comparisons) . . . . .          | 49        |
| <b>Supplemental figure 7J: Iron deficiency anemia prevalence difference</b>                       | <b>50</b> |
| 7J1: Stratified by Household socio-economic status . . . . .                                      | 50        |
| 7J2: Stratified by Household food insecurity (insufficient comparisons) . . . . .                 | 51        |
| 7J3: Stratified by Household source water quality (insufficient comparisons) . . . . .            | 52        |
| 7J4: Stratified by Household sanitation (insufficient comparisons) . . . . .                      | 53        |
| 7J5: Stratified by Season at the time of assessment (insufficient comparisons) . . . . .          | 54        |
| <b>Supplemental figure 7K: Geometric mean ratio of soluble transferrin receptor concentration</b> | <b>55</b> |
| 7K1: Stratified by Household socio-economic status . . . . .                                      | 55        |
| 7K2: Stratified by Household food insecurity . . . . .                                            | 56        |
| 7K3: Stratified by Household source water quality . . . . .                                       | 57        |
| 7K4: Stratified by Household sanitation (insufficient comparisons) . . . . .                      | 58        |
| 7K5: Stratified by Season at the time of assessment . . . . .                                     | 59        |
| <b>Supplemental figure 7L: Elevated soluble transferrin receptor prevalence ratio</b>             | <b>60</b> |
| 7L1: Stratified by Household socio-economic status . . . . .                                      | 60        |
| 7L2: Stratified by Household food insecurity . . . . .                                            | 61        |
| 7L3: Stratified by Household source water quality . . . . .                                       | 62        |
| 7L4: Stratified by Household sanitation (insufficient comparisons) . . . . .                      | 63        |
| 7L5: Stratified by Season at the time of assessment . . . . .                                     | 64        |
| <b>Supplemental figure 7M: Elevated soluble transferrin receptor prevalence difference</b>        | <b>65</b> |
| 7M1: Stratified by Household socio-economic status . . . . .                                      | 65        |
| 7M2: Stratified by Household food insecurity . . . . .                                            | 66        |
| 7M3: Stratified by Household source water quality . . . . .                                       | 67        |
| 7M4: Stratified by Household sanitation (insufficient comparisons) . . . . .                      | 68        |
| 7M5: Stratified by Season at the time of assessment . . . . .                                     | 69        |
| <b>Supplemental figure 7N: Geometric mean ratio of zinc protoporphyrin concentration</b>          | <b>70</b> |
| 7N1: Stratified by Household socio-economic status . . . . .                                      | 70        |
| 7N2: Stratified by Household food insecurity . . . . .                                            | 71        |

|                                                                                               |            |
|-----------------------------------------------------------------------------------------------|------------|
| 7N3: Stratified by Household source water quality (insufficient comparisons) . . . . .        | 72         |
| 7N4: Stratified by Household sanitation (insufficient comparisons) . . . . .                  | 73         |
| 7N5: Stratified by Season at the time of assessment . . . . .                                 | 74         |
| <b>Supplemental figure 7O: Elevated zinc protoporphyrin prevalence ratio</b>                  | <b>75</b>  |
| 7O1: Stratified by Household socio-economic status . . . . .                                  | 75         |
| 7O2: Stratified by Household food insecurity . . . . .                                        | 76         |
| 7O3: Stratified by Household source water quality (insufficient comparisons) . . . . .        | 77         |
| 7O4: Stratified by Household sanitation (insufficient comparisons) . . . . .                  | 78         |
| 7O5: Stratified by Season at the time of assessment . . . . .                                 | 79         |
| <b>Supplemental figure 7P: Elevated zinc protoporphyrin prevalence difference</b>             | <b>80</b>  |
| 7P1: Stratified by Household socio-economic status . . . . .                                  | 80         |
| 7P2: Stratified by Household food insecurity . . . . .                                        | 81         |
| 7P3: Stratified by Household source water quality (insufficient comparisons) . . . . .        | 82         |
| 7P4: Stratified by Household sanitation (insufficient comparisons) . . . . .                  | 83         |
| 7P5: Stratified by Season at the time of assessment . . . . .                                 | 84         |
| <b>Supplemental figure 7Q: Geometric mean ratio of plasma zinc concentration</b>              | <b>85</b>  |
| 7Q1: Stratified by Household socio-economic status . . . . .                                  | 85         |
| 7Q2: Stratified by Household food insecurity (insufficient comparisons) . . . . .             | 86         |
| 7Q3: Stratified by Household source water quality (insufficient comparisons) . . . . .        | 87         |
| 7Q4: Stratified by Household sanitation (insufficient comparisons) . . . . .                  | 88         |
| 7Q5: Stratified by Season at the time of assessment . . . . .                                 | 89         |
| <b>Supplemental figure 7R: Geometric mean ratio of retinol concentration</b>                  | <b>90</b>  |
| 7R1: Stratified by Household socio-economic status . . . . .                                  | 90         |
| 7R2: Stratified by Household food insecurity . . . . .                                        | 91         |
| 7R3: Stratified by Household source water quality (insufficient comparisons) . . . . .        | 92         |
| 7R4: Stratified by Household sanitation (insufficient comparisons) . . . . .                  | 93         |
| 7R5: Stratified by Season at the time of assessment . . . . .                                 | 94         |
| <b>Supplemental figure 7S: Low vitamin A (retinol &lt; 0.70 µmol/L) prevalence ratio</b>      | <b>95</b>  |
| 7S1: Stratified by Household socio-economic status (insufficient comparisons) . . . . .       | 95         |
| 7S2: Stratified by Household food insecurity (insufficient comparisons) . . . . .             | 96         |
| 7S3: Stratified by Household source water quality (insufficient comparisons) . . . . .        | 97         |
| 7S4: Stratified by Household sanitation (insufficient comparisons) . . . . .                  | 98         |
| 7S5: Stratified by Season at the time of assessment (insufficient comparisons) . . . . .      | 99         |
| <b>Supplemental figure 7T: Low vitamin A (retinol &lt; 0.70 µmol/L) prevalence difference</b> | <b>100</b> |
| 7T1: Stratified by Household socio-economic status (insufficient comparisons) . . . . .       | 100        |
| 7T2: Stratified by Household food insecurity (insufficient comparisons) . . . . .             | 101        |
| 7T3: Stratified by Household source water quality (insufficient comparisons) . . . . .        | 102        |
| 7T4: Stratified by Household sanitation (insufficient comparisons) . . . . .                  | 103        |
| 7T5: Stratified by Season at the time of assessment (insufficient comparisons) . . . . .      | 104        |
| <b>Supplemental figure 7U: Marginal vitamin A (retinol &lt; 1.05 µmol/L) prevalence ratio</b> | <b>105</b> |
| 7U1: Stratified by Household socio-economic status . . . . .                                  | 105        |
| 7U2: Stratified by Household food insecurity (insufficient comparisons) . . . . .             | 106        |
| 7U3: Stratified by Household source water quality (insufficient comparisons) . . . . .        | 107        |
| 7U4: Stratified by Household sanitation (insufficient comparisons) . . . . .                  | 108        |
| 7U5: Stratified by Season at the time of assessment . . . . .                                 | 109        |

|                                                                                                        |            |
|--------------------------------------------------------------------------------------------------------|------------|
| <b>Supplemental figure 7V: Marginal vitamin A (retinol &lt; 1.05 µmol/L) prevalence difference</b>     | <b>110</b> |
| 7V1: Stratified by Household socio-economic status . . . . .                                           | 110        |
| 7V2: Stratified by Household food insecurity (insufficient comparisons) . . . . .                      | 111        |
| 7V3: Stratified by Household source water quality (insufficient comparisons) . . . . .                 | 112        |
| 7V4: Stratified by Household sanitation (insufficient comparisons) . . . . .                           | 113        |
| 7V5: Stratified by Season at the time of assessment . . . . .                                          | 114        |
| <b>Supplemental figure 7W: Geometric mean ratio of retinol binding protein concentration</b>           | <b>115</b> |
| 7W1: Stratified by Household socio-economic status . . . . .                                           | 115        |
| 7W2: Stratified by Household food insecurity . . . . .                                                 | 116        |
| 7W3: Stratified by Household source water quality . . . . .                                            | 117        |
| 7W4: Stratified by Household sanitation (insufficient comparisons) . . . . .                           | 118        |
| 7W5: Stratified by Season at the time of assessment . . . . .                                          | 119        |
| <b>Supplemental figure 7X: Low vitamin A status (RBP &lt; 0.70 µmol/L) prevalence ratio</b>            | <b>120</b> |
| 7X1: Stratified by Household socio-economic status (insufficient comparisons) . . . . .                | 120        |
| 7X2: Stratified by Household food insecurity (insufficient comparisons) . . . . .                      | 121        |
| 7X3: Stratified by Household source water quality (insufficient comparisons) . . . . .                 | 122        |
| 7X4: Stratified by Household sanitation (insufficient comparisons) . . . . .                           | 123        |
| 7X5: Stratified by Season at the time of assessment (insufficient comparisons) . . . . .               | 124        |
| <b>Supplemental figure 7Y: Low vitamin A status (RBP &lt; 0.70 µmol/L) prevalence difference</b>       | <b>125</b> |
| 7Y1: Stratified by Household socio-economic status (insufficient comparisons) . . . . .                | 125        |
| 7Y2: Stratified by Household food insecurity (insufficient comparisons) . . . . .                      | 126        |
| 7Y3: Stratified by Household source water quality (insufficient comparisons) . . . . .                 | 127        |
| 7Y4: Stratified by Household sanitation (insufficient comparisons) . . . . .                           | 128        |
| 7Y5: Stratified by Season at the time of assessment (insufficient comparisons) . . . . .               | 129        |
| <b>Supplemental figure 7Z: Marginal vitamin A status (RBP &lt; 1.05 µmol/L) prevalence ratio</b>       | <b>130</b> |
| 7Z1: Stratified by Household socio-economic status . . . . .                                           | 130        |
| 7Z2: Stratified by Household food insecurity . . . . .                                                 | 131        |
| 7Z3: Stratified by Household source water quality . . . . .                                            | 132        |
| 7Z4: Stratified by Household sanitation (insufficient comparisons) . . . . .                           | 133        |
| 7Z5: Stratified by Season at the time of assessment . . . . .                                          | 134        |
| <b>Supplemental figure 7AA: Marginal vitamin A status (RBP &lt; 1.05 µmol/L) prevalence difference</b> | <b>135</b> |
| 7AA1: Stratified by Household socio-economic status . . . . .                                          | 135        |
| 7AA2: Stratified by Household food insecurity . . . . .                                                | 136        |
| 7AA3: Stratified by Household source water quality . . . . .                                           | 137        |
| 7AA4: Stratified by Household sanitation (insufficient comparisons) . . . . .                          | 138        |
| 7AA5: Stratified by Season at the time of assessment . . . . .                                         | 139        |

These figures are forest plots showing the individual-level effect modification of intervention effects. Each figure has the estimates of intervention effect stratified within study by individual-level effect modifier category. For continuous outcomes the intervention effect is measured by the difference in mean of the LNS group minus control. For log transformed continuous outcomes, the intervention effect is measured by the ratio of geometric means, the effect estimate is the geometric mean in the LNS group divided by the geometric mean in the control group. For dichotomous outcomes analyzed via prevalence ratios, the effect estimate is the prevalence in the LNS group divided by the prevalence in the control group. For dichotomous outcomes analyzed via prevalence differences, the effect estimate is the prevalence in the LNS group minus the prevalence in the control group. The labels on the far left correspond to trial level information. In the middle left and on the right the values indicate the study level effect estimate, confidence interval, and weighting for deriving the pooled estimates is shown by subgroup.

Not all trials were included in all individual-level effect modification analyses, either because they did not measure the biomarker outcome or the effect modifier of interest (e.g., baseline anemia or acute malnutrition, receipt of high-dose vitamin A supplement), or because the prevalence of the binary outcome or proportion of children within one of the effect modifier subgroups was too low to allow us to generate effect estimates.

RBP, retinol binding protein.

### Supplemental figure 7A: Mean difference in hemoglobin concentration

#### 7A1: Stratified by Household socio-economic status

P-for-interaction = 0.528

Difference in MDs = -0.26 (-1.07, 0.55)

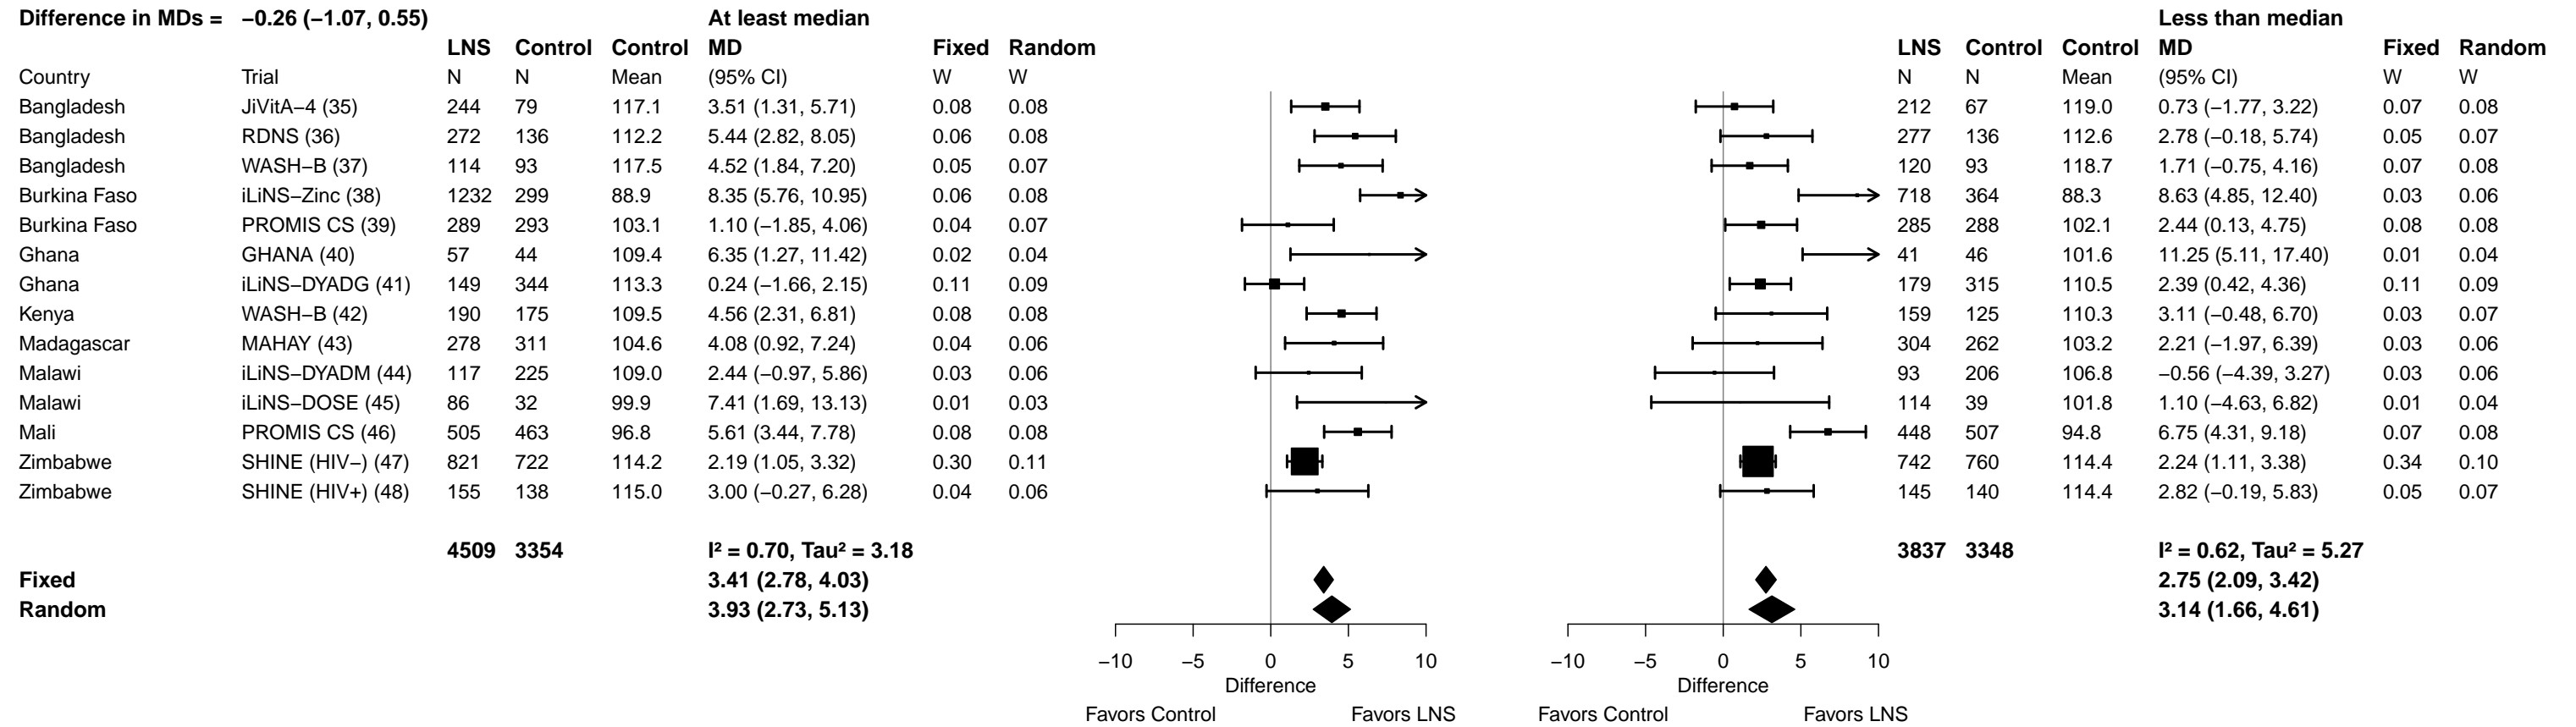

Supplemental figure 7A: Mean difference in hemoglobin concentration

7A2: Stratified by Household food insecurity

P-for-interaction = 0.470

Difference in MDs = 0.40 (-0.68, 1.48)

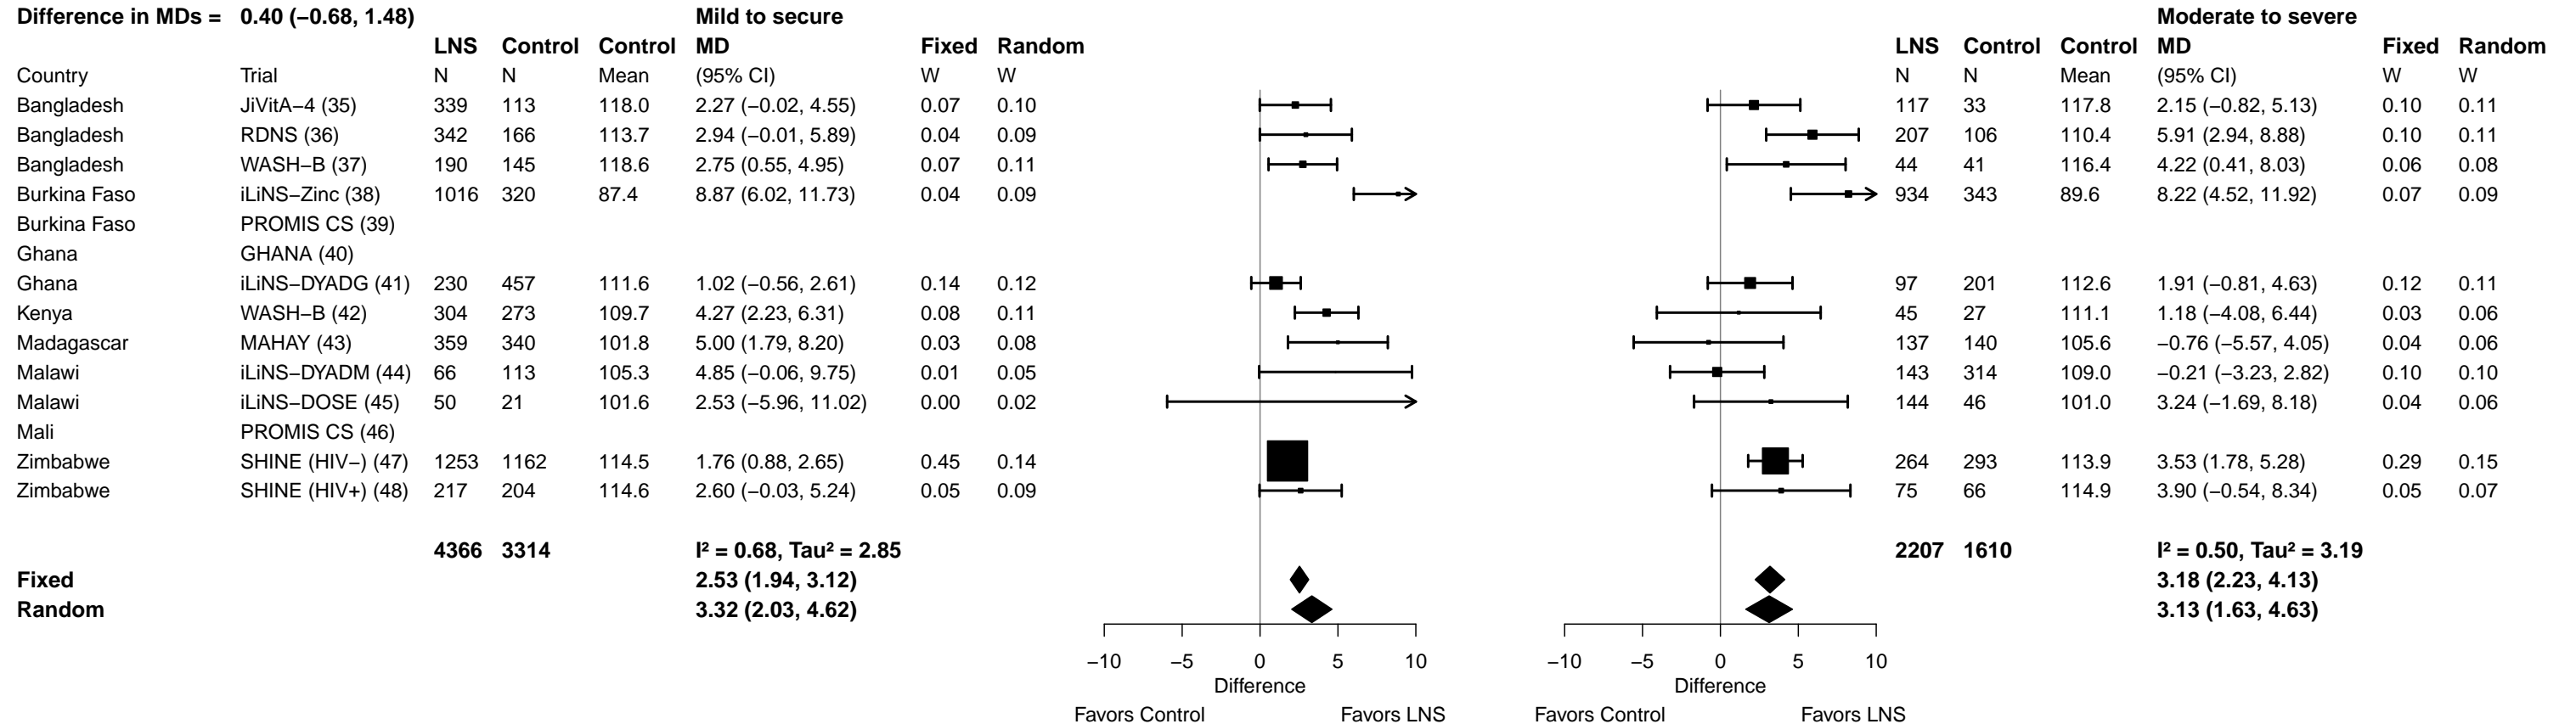



Supplemental figure 7A: Mean difference in hemoglobin concentration

7A4: Stratified by Household sanitation

P-for-interaction = 0.607

Difference in MDs = 0.32 (-0.89, 1.52)

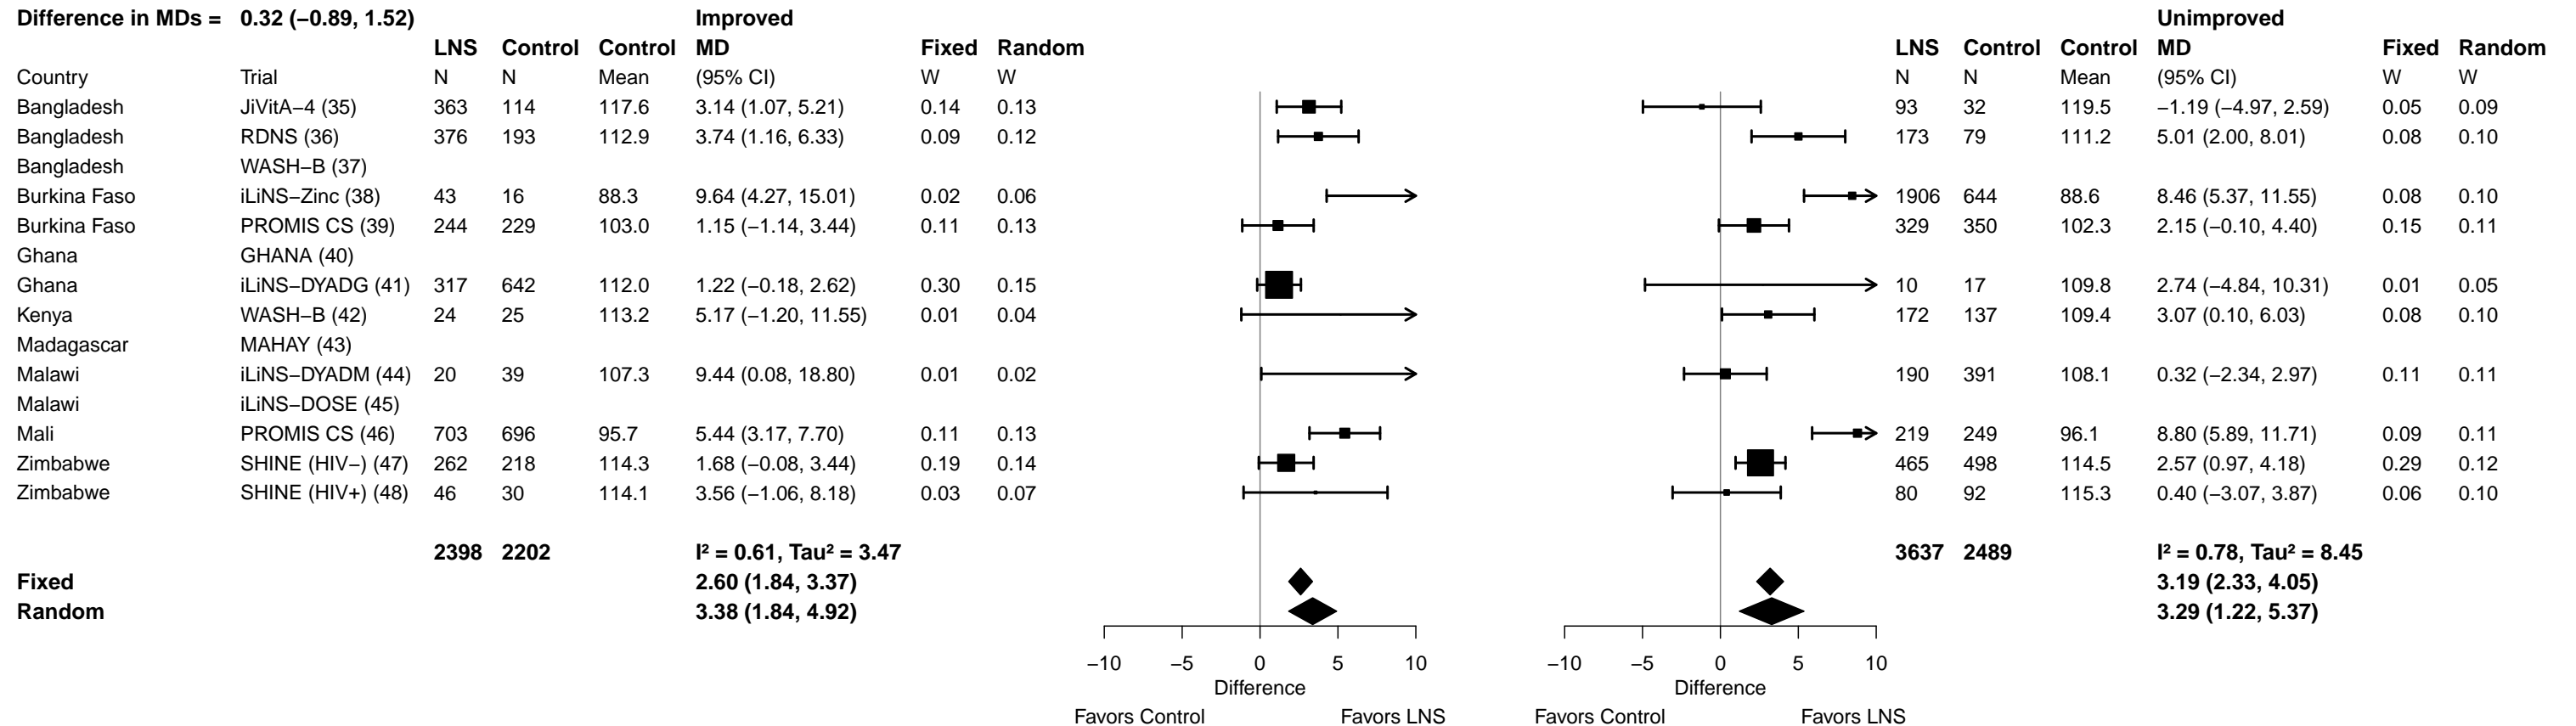



Supplemental figure 7A: Mean difference in hemoglobin concentration

7A5: Stratified by Season at the time of assessment

P-for-interaction = 0.190

Difference in MDs = -0.69 (-1.72, 0.34)

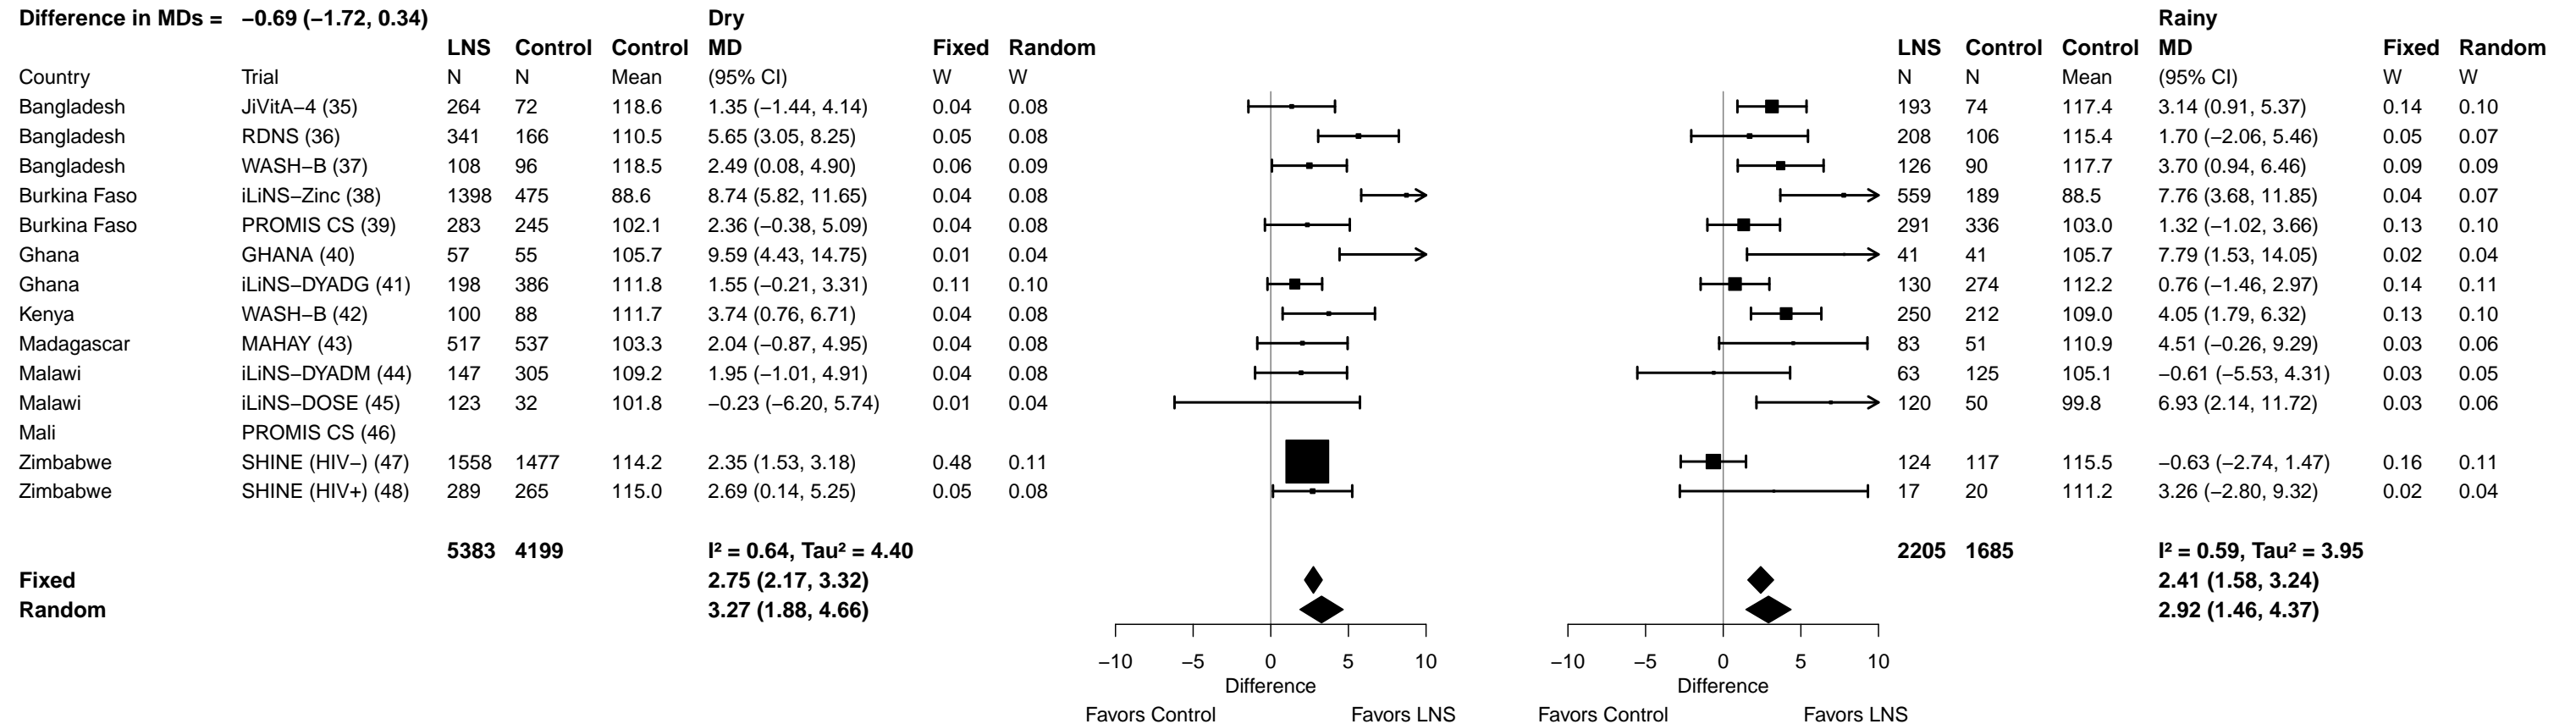

### Supplemental figure 7B: Anemia prevalence ratio

#### 7B1: Stratified by Household socio-economic status

**P-for-interaction = 0.762**

**Ratio of PRs = 0.99 (0.95, 1.04)**

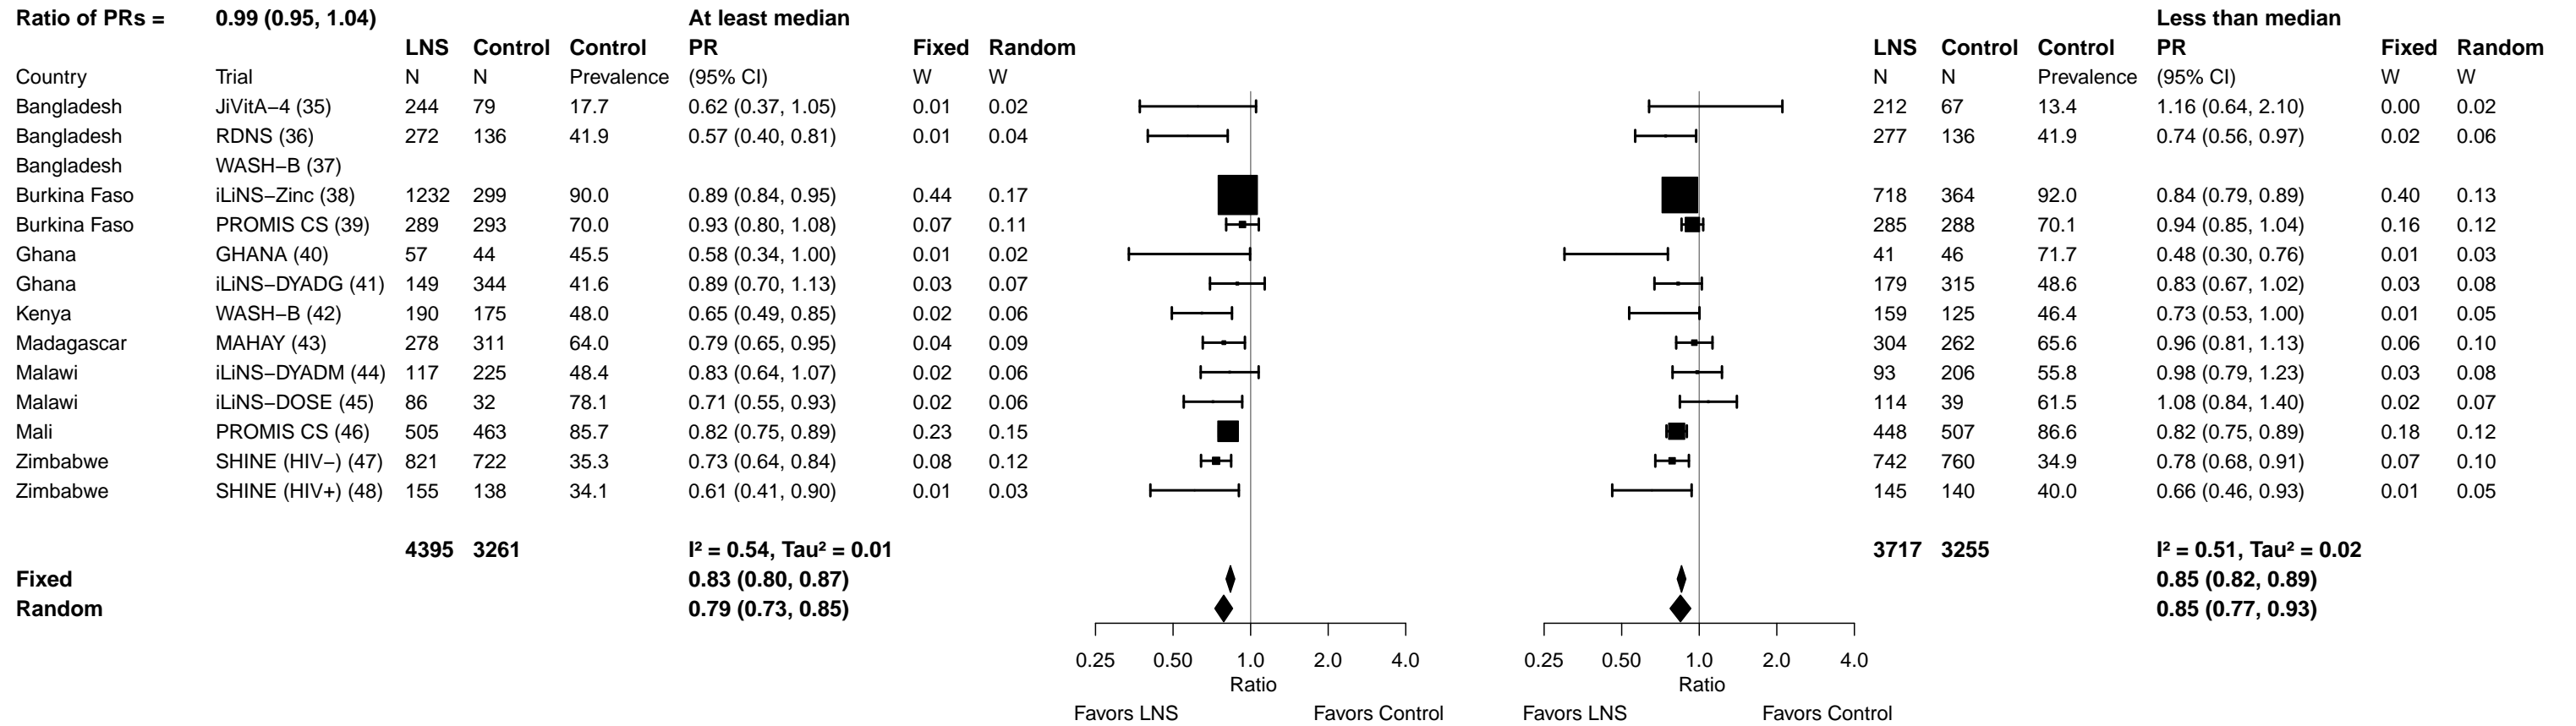

Supplemental figure 7B: Anemia prevalence ratio

7B2: Stratified by Household food insecurity

P-for-interaction = 0.949

Ratio of PRs = 1.00 (0.95, 1.05)

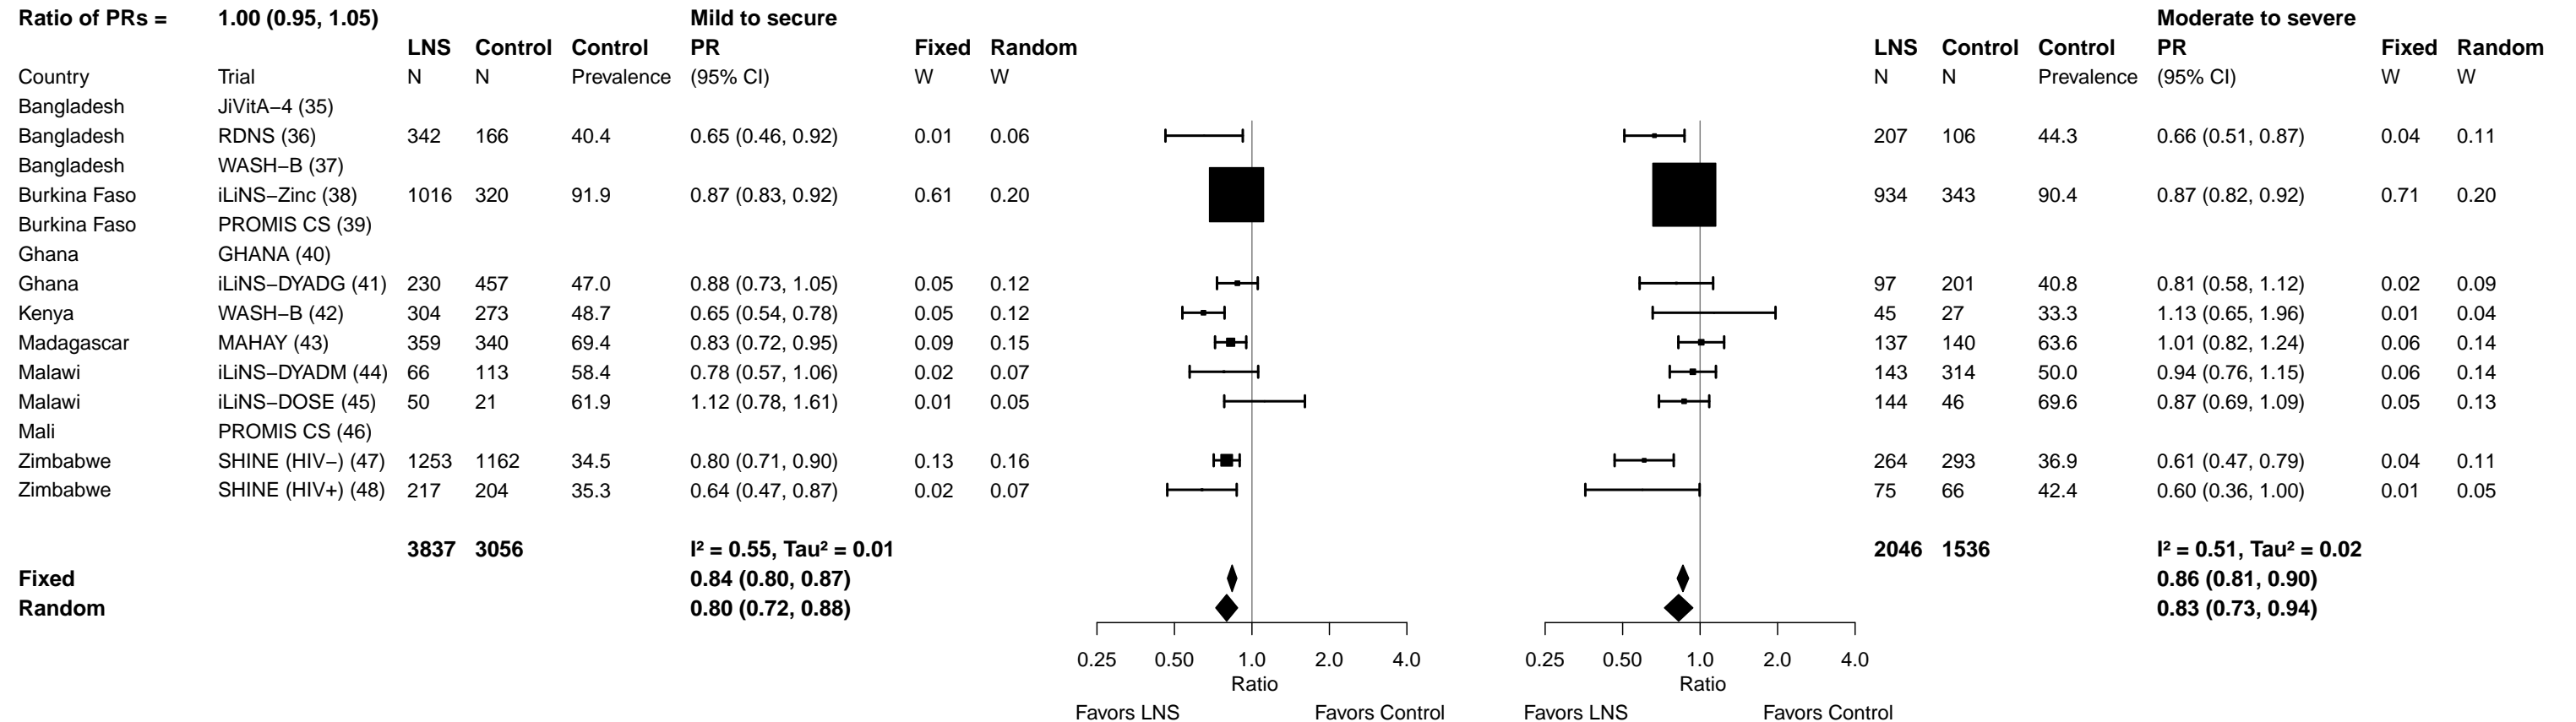

Supplemental figure 7B: Anemia prevalence ratio

7B3: Stratified by Household source water quality

P-for-interaction = 0.009

Ratio of PRs = 1.08 (1.02, 1.14)

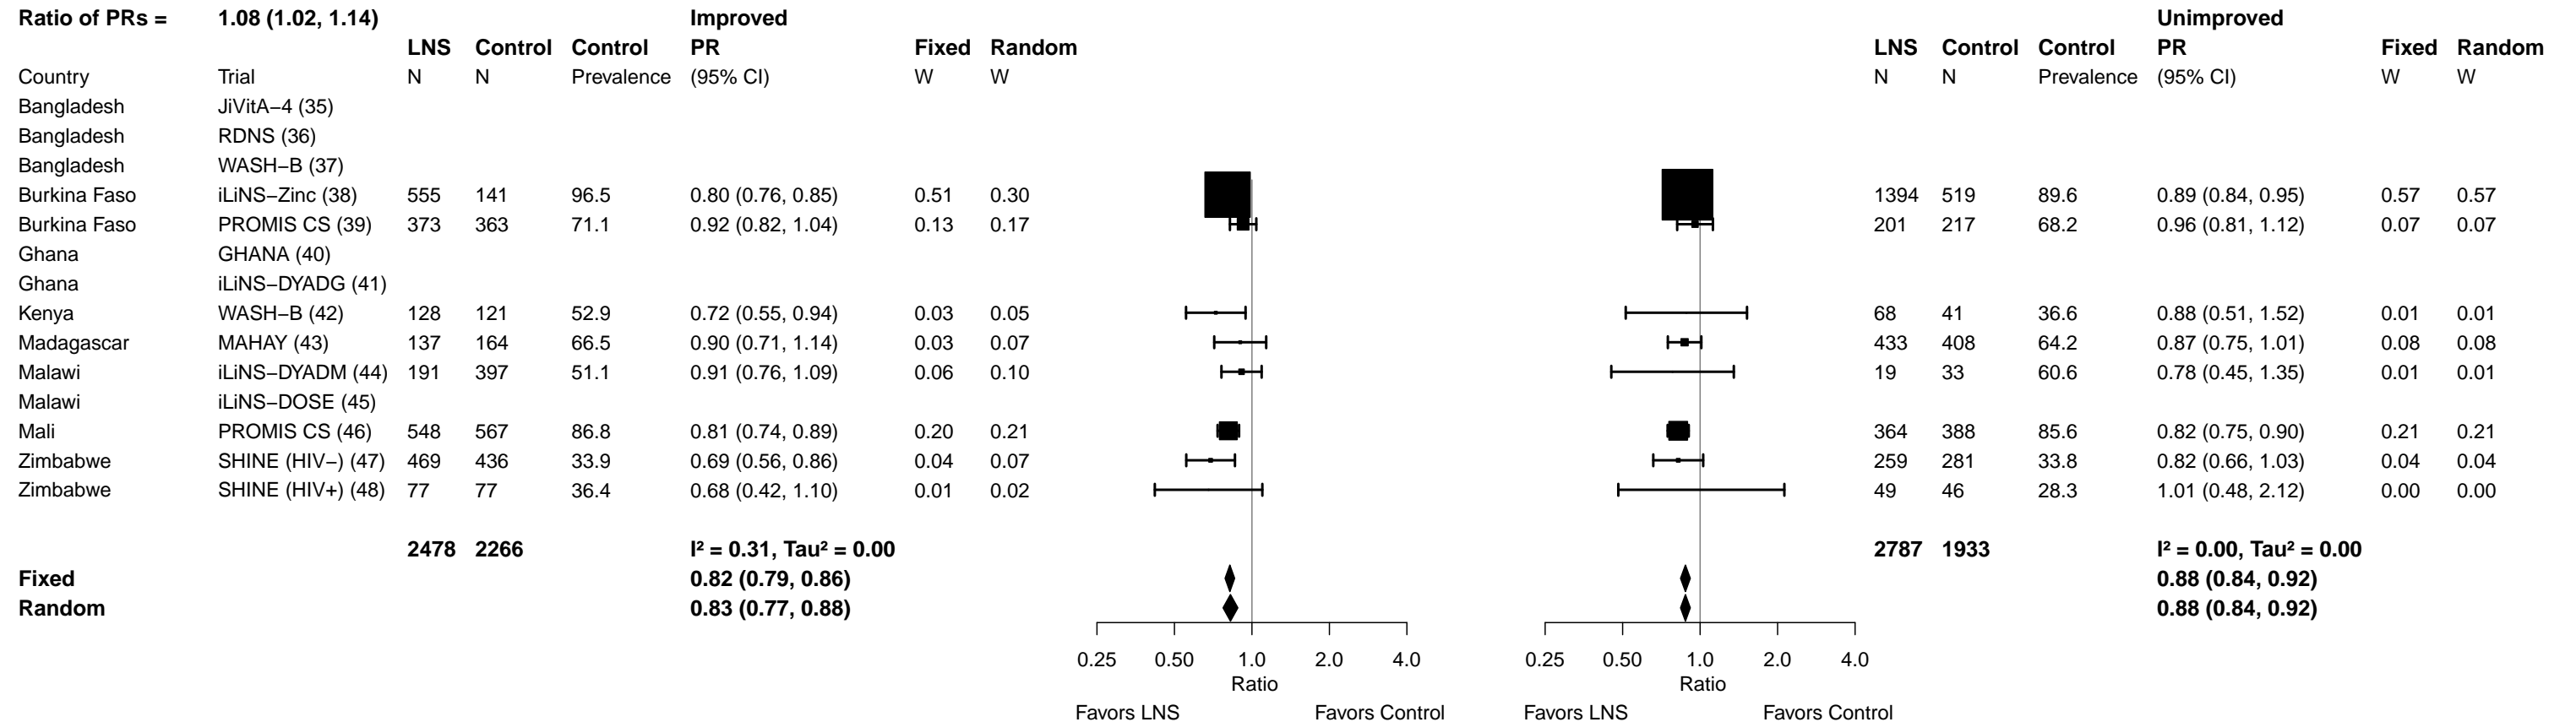

Supplemental figure 7B: Anemia prevalence ratio

7B4: Stratified by Household sanitation

**P-for-interaction = 0.092**  
**Ratio of PRs = 0.92 (0.83, 1.01)**

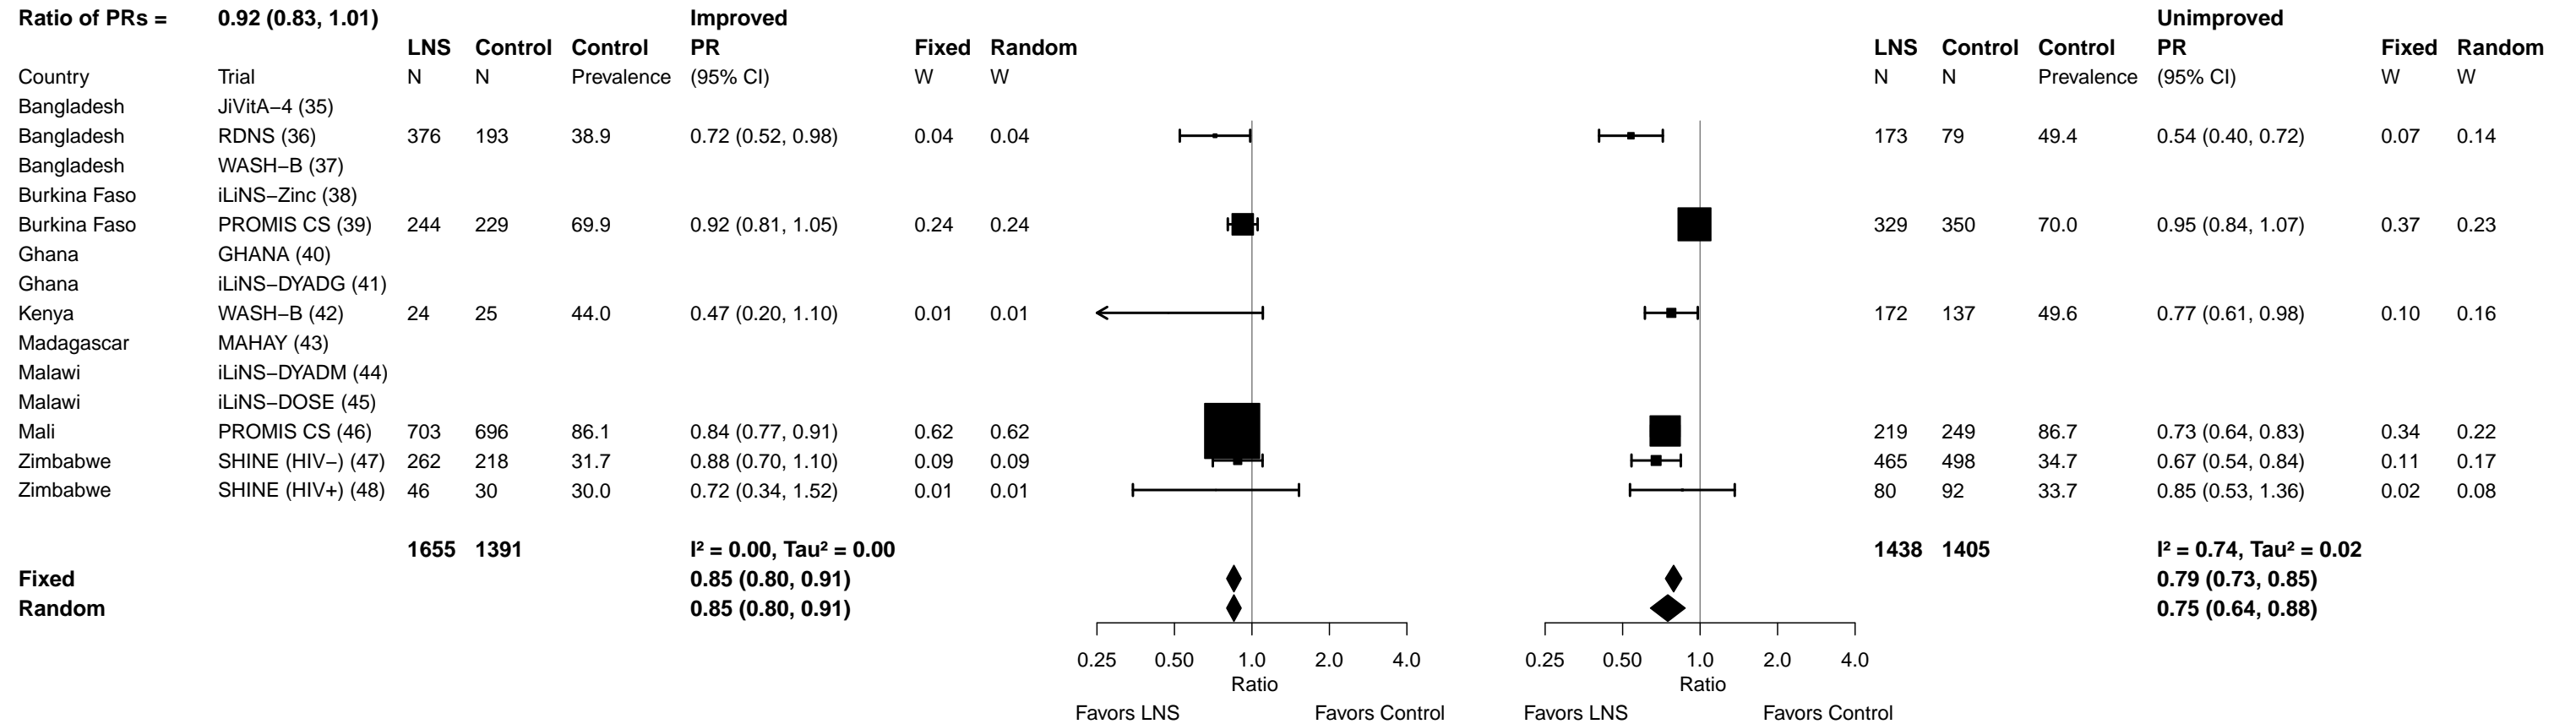

Supplemental figure 7B: Anemia prevalence ratio

7B5: Stratified by Season at the time of assessment

P-for-interaction = 0.434

Ratio of PRs = 1.03 (0.96, 1.10)

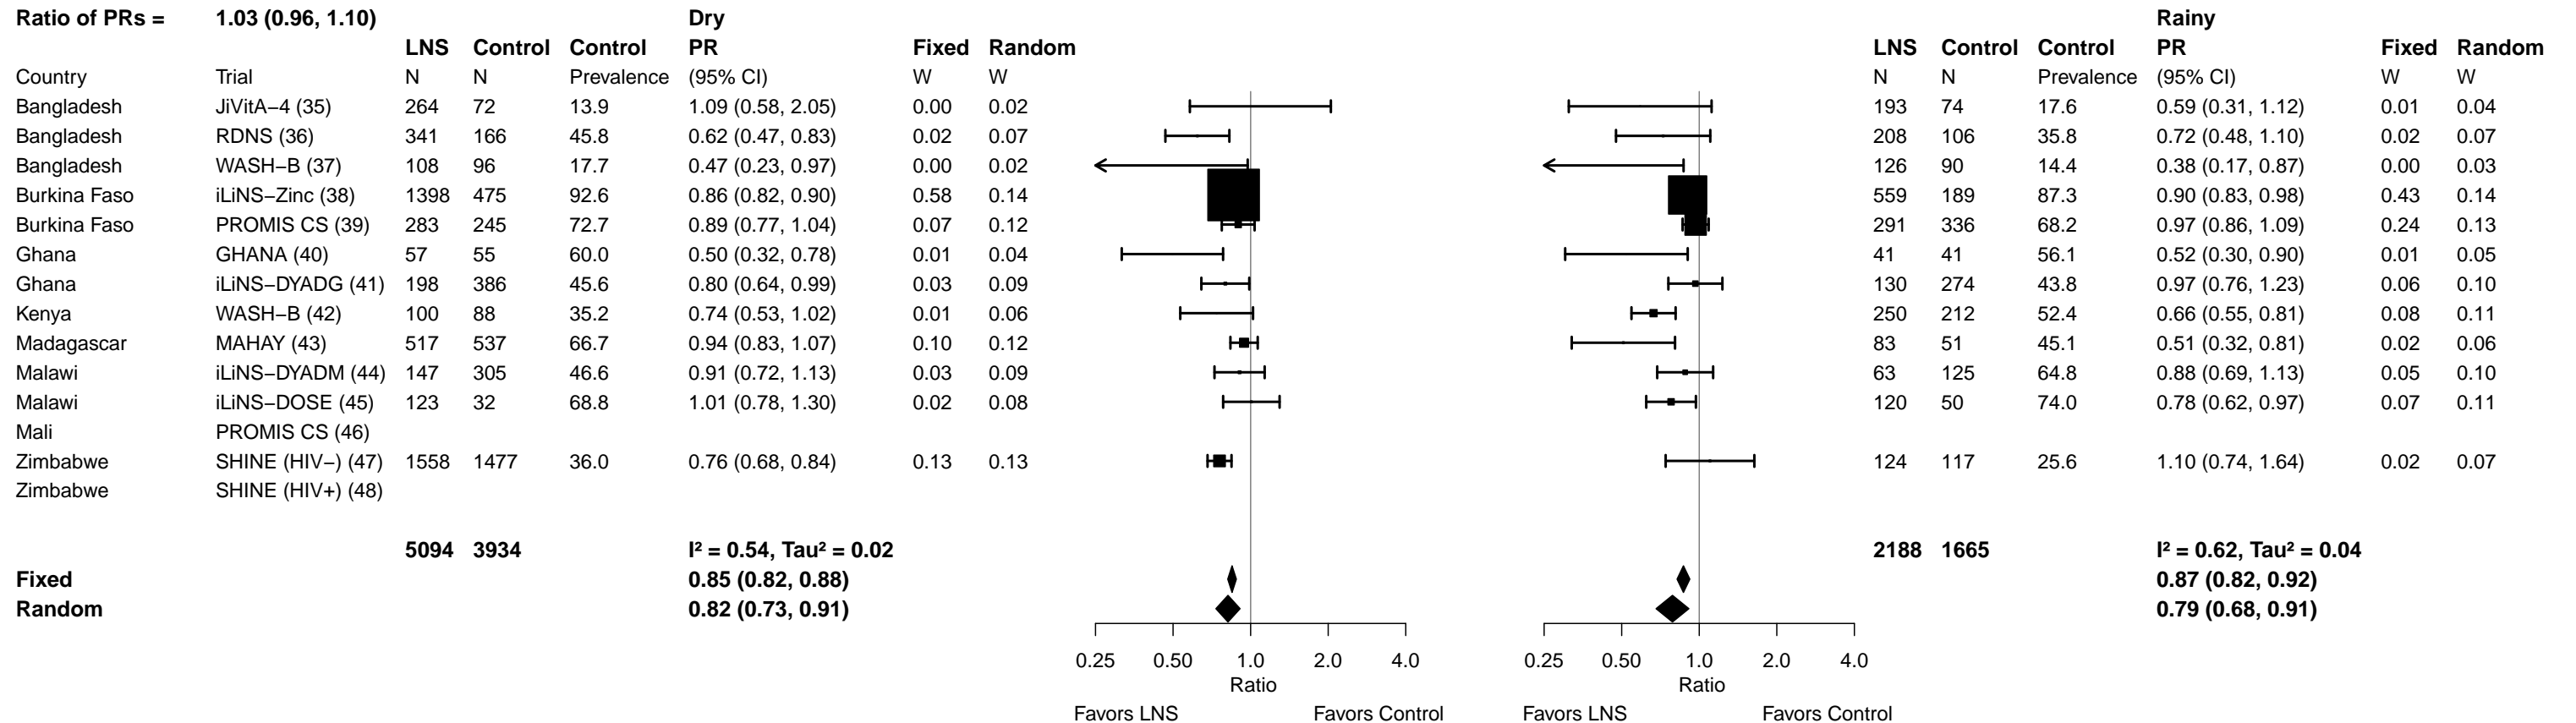

### Supplemental figure 7C: Anemia prevalence difference

#### 7C1: Stratified by Household socio-economic status

**P-for-interaction = 0.499**

**Difference in PDs = 0.01 (-0.02, 0.04)**

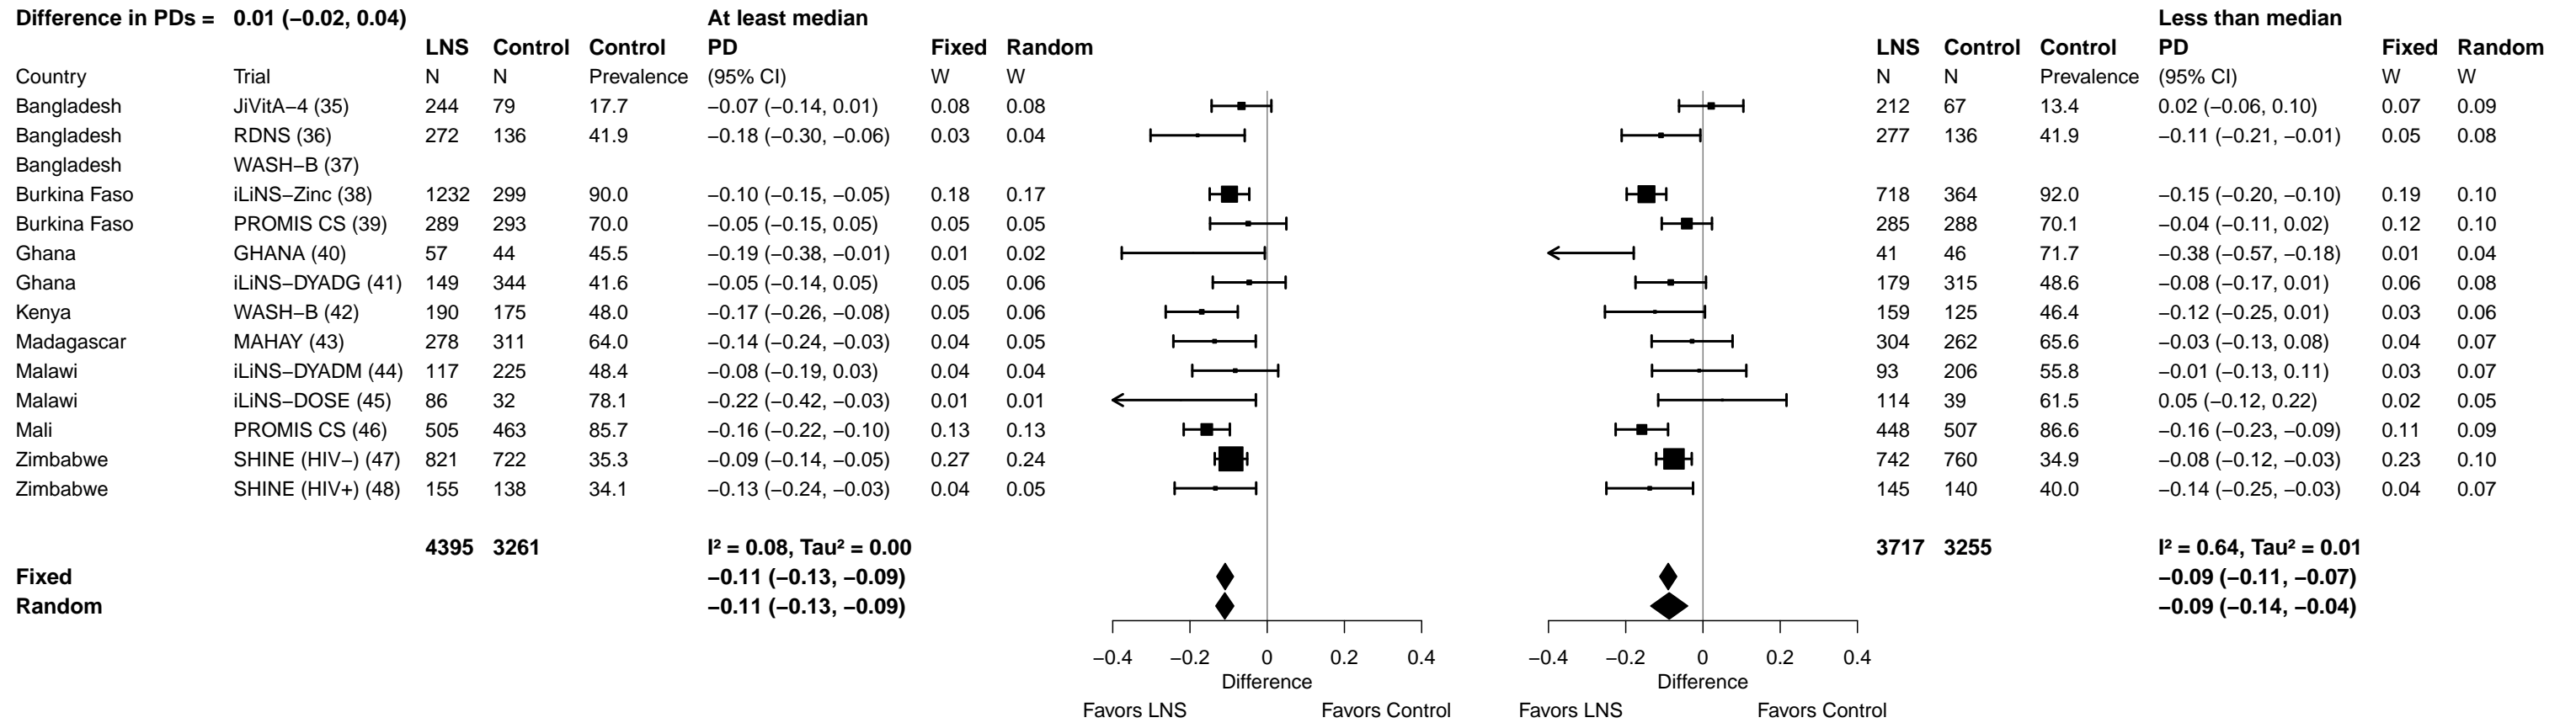

Supplemental figure 7C: Anemia prevalence difference

7C2: Stratified by Household food insecurity

**P-for-interaction = 0.857**  
**Difference in PDs = 0.00 (-0.04, 0.03)**

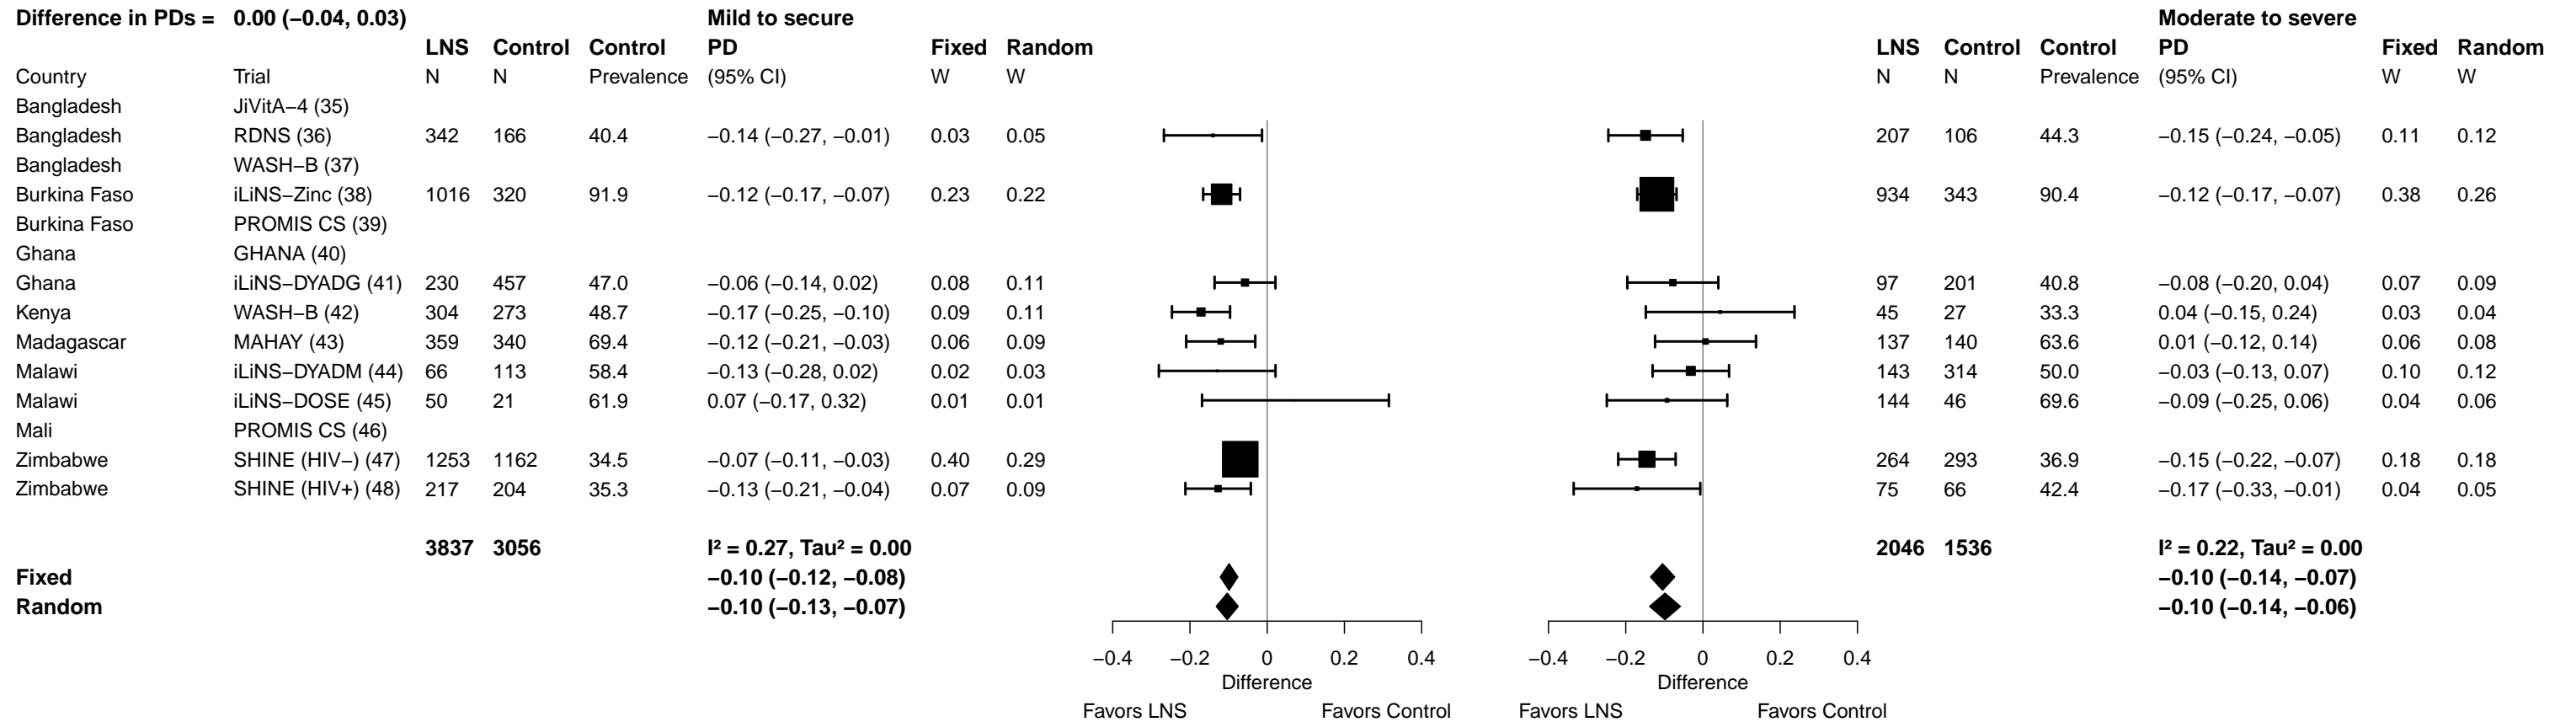



Supplemental figure 7C: Anemia prevalence difference

7C3: Stratified by Household source water quality

**P-for-interaction = 0.005**  
**Difference in PDs = 0.05 (0.02, 0.09)**

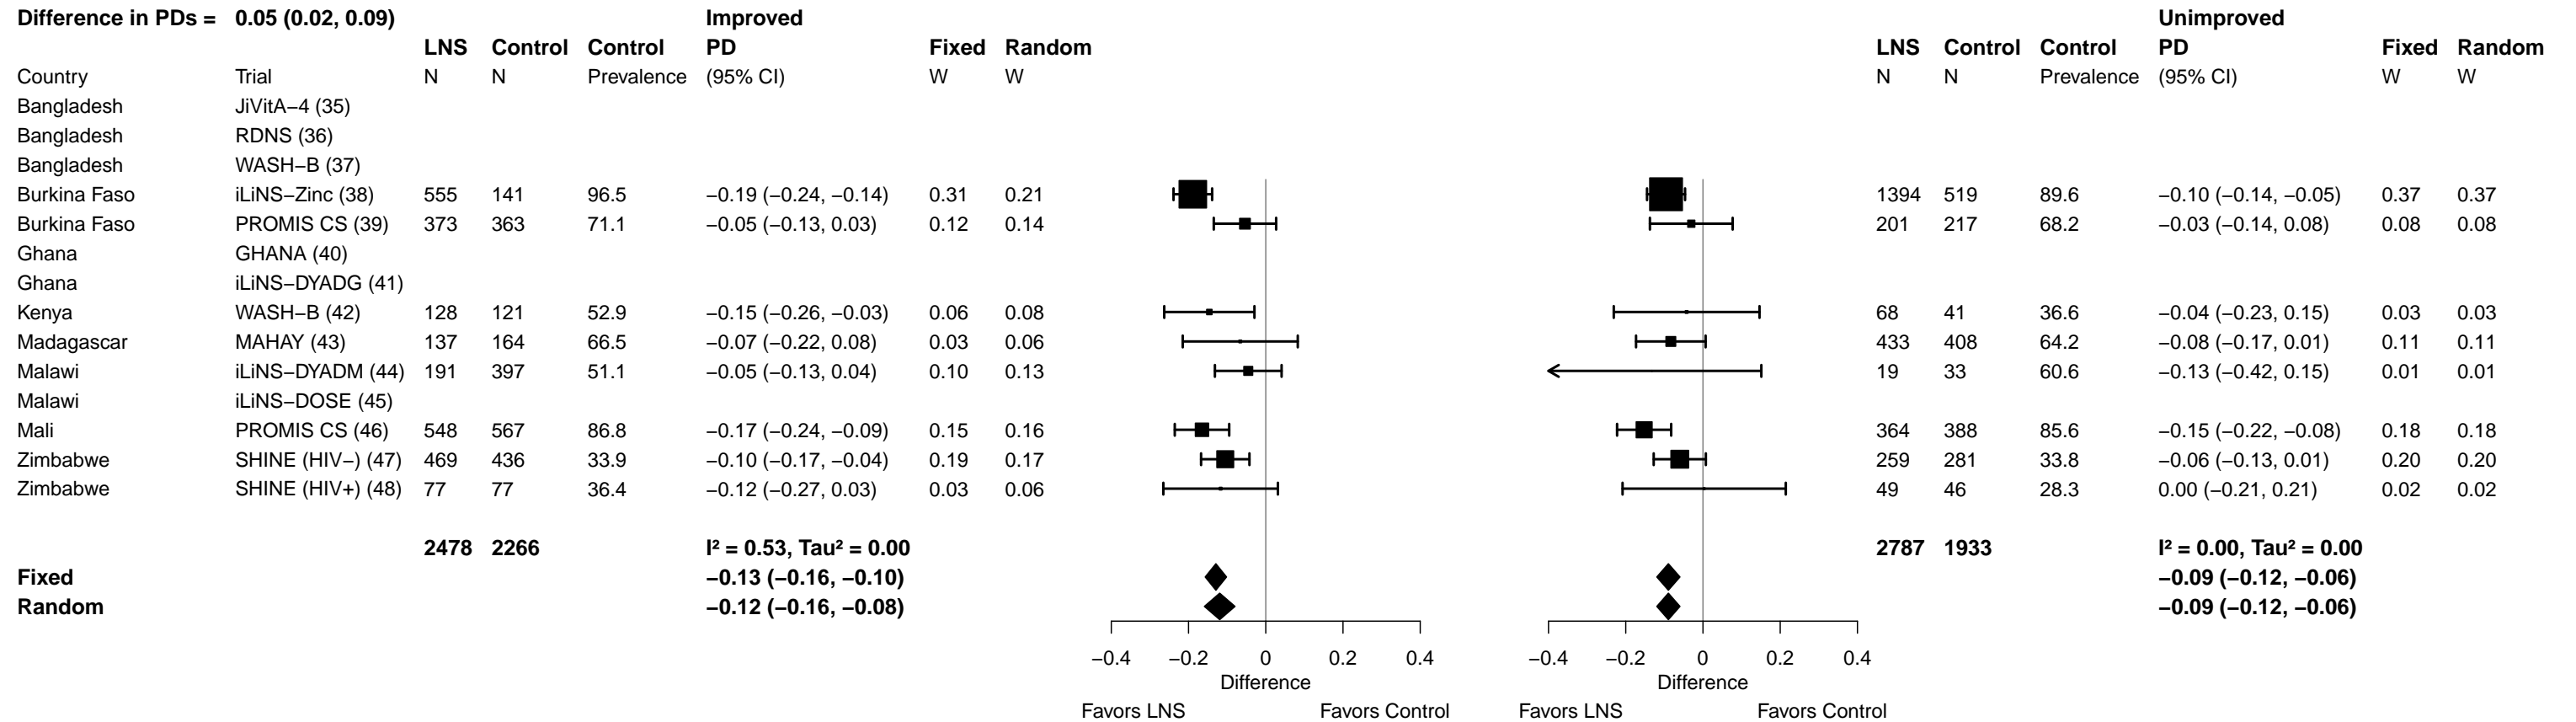



Supplemental figure 7C: Anemia prevalence difference

7C5: Stratified by Season at the time of assessment

P-for-interaction = 0.332

Difference in PDs = 0.02 (-0.02, 0.05)

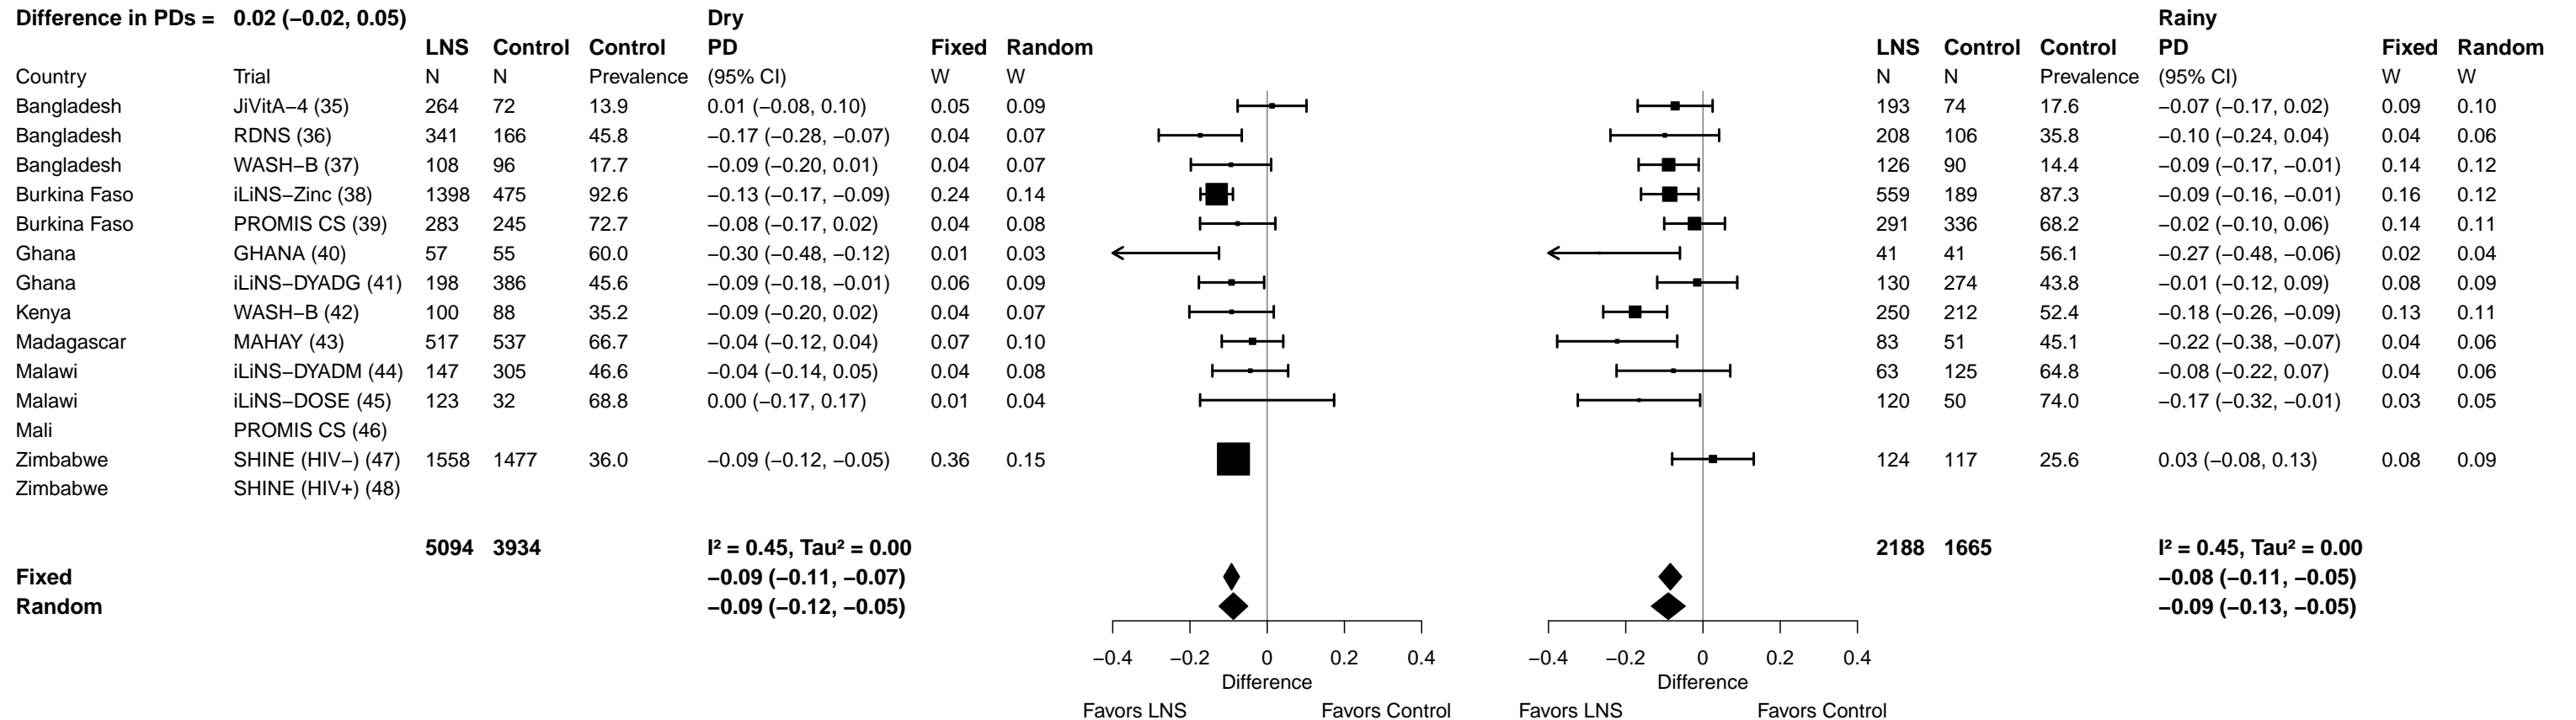

### Supplemental figure 7D: Moderate-to-severe anemia prevalence ratio

#### 7D1: Stratified by Household socio-economic status

**P-for-interaction = 0.244**

**Ratio of PRs = 0.95 (0.88, 1.03)**

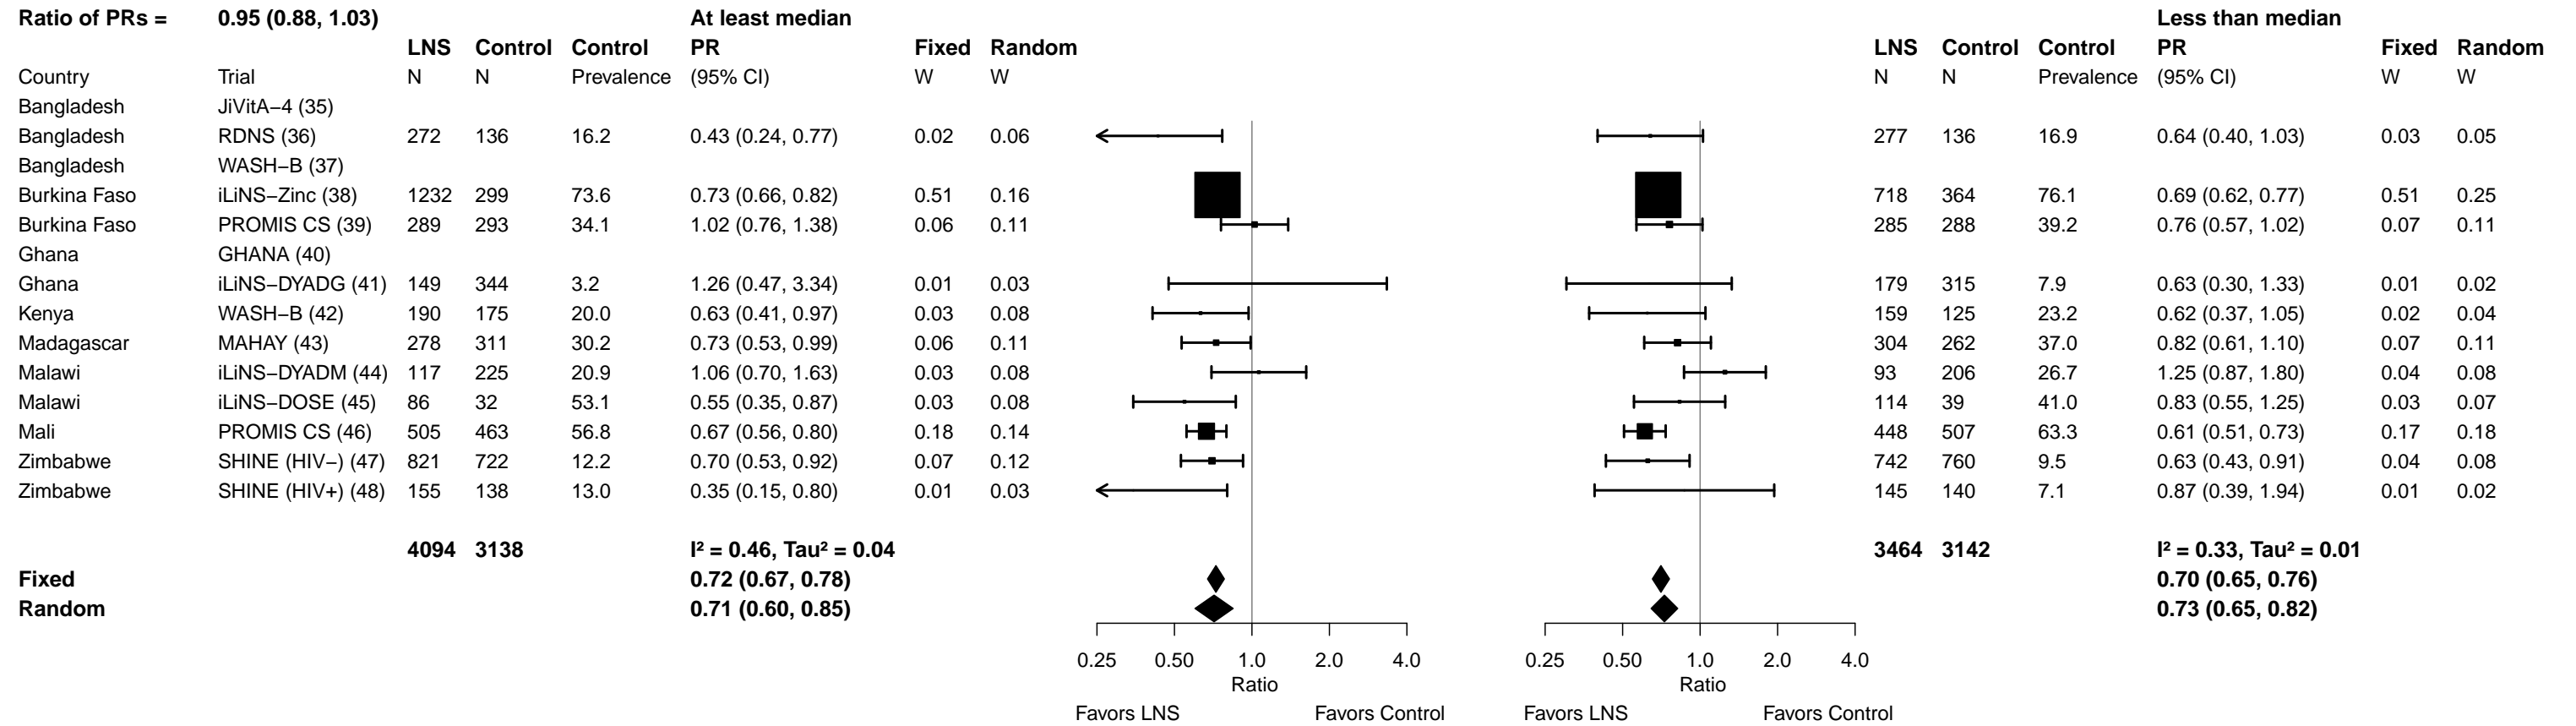



Supplemental figure 7D: Moderate-to-severe anemia prevalence ratio

7D3: Stratified by Household source water quality

P-for-interaction = 0.952

Ratio of PRs = 1.00 (0.89, 1.14)

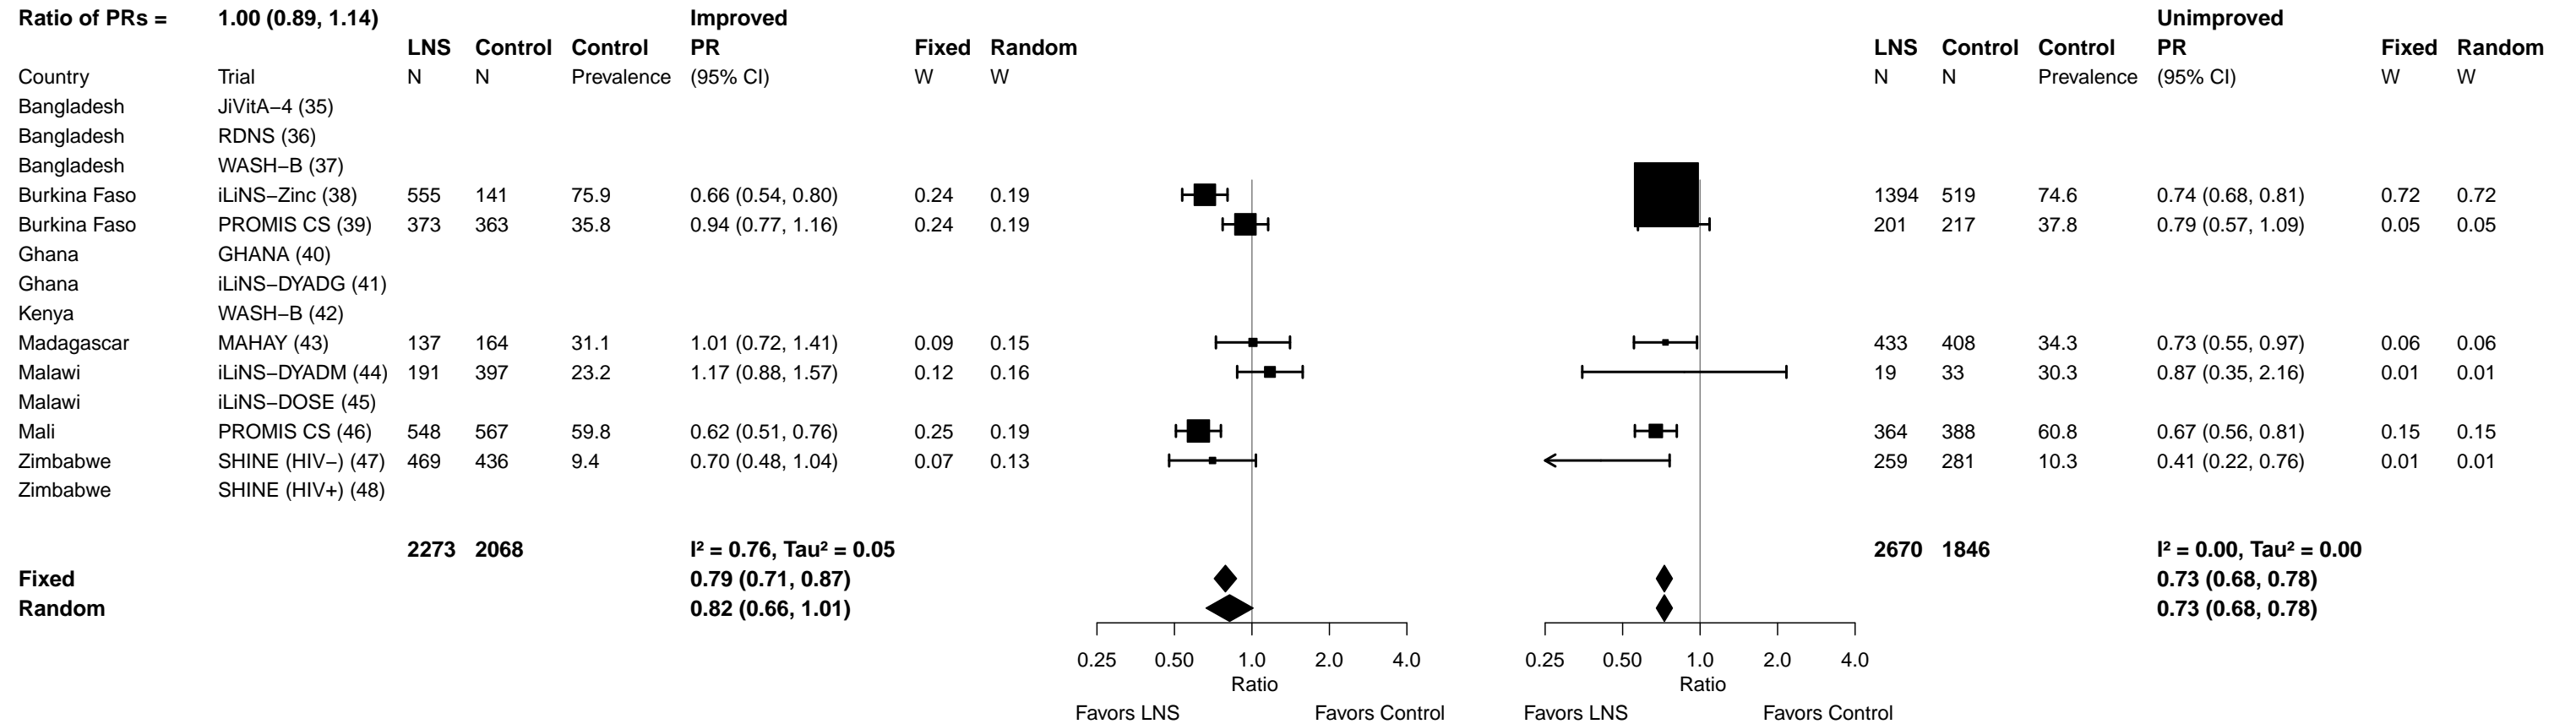

Supplemental figure 7D: Moderate-to-severe anemia prevalence ratio

7D4: Stratified by Household sanitation

**P-for-interaction = 0.004**

**Ratio of PRs = 0.74 (0.60, 0.91)**

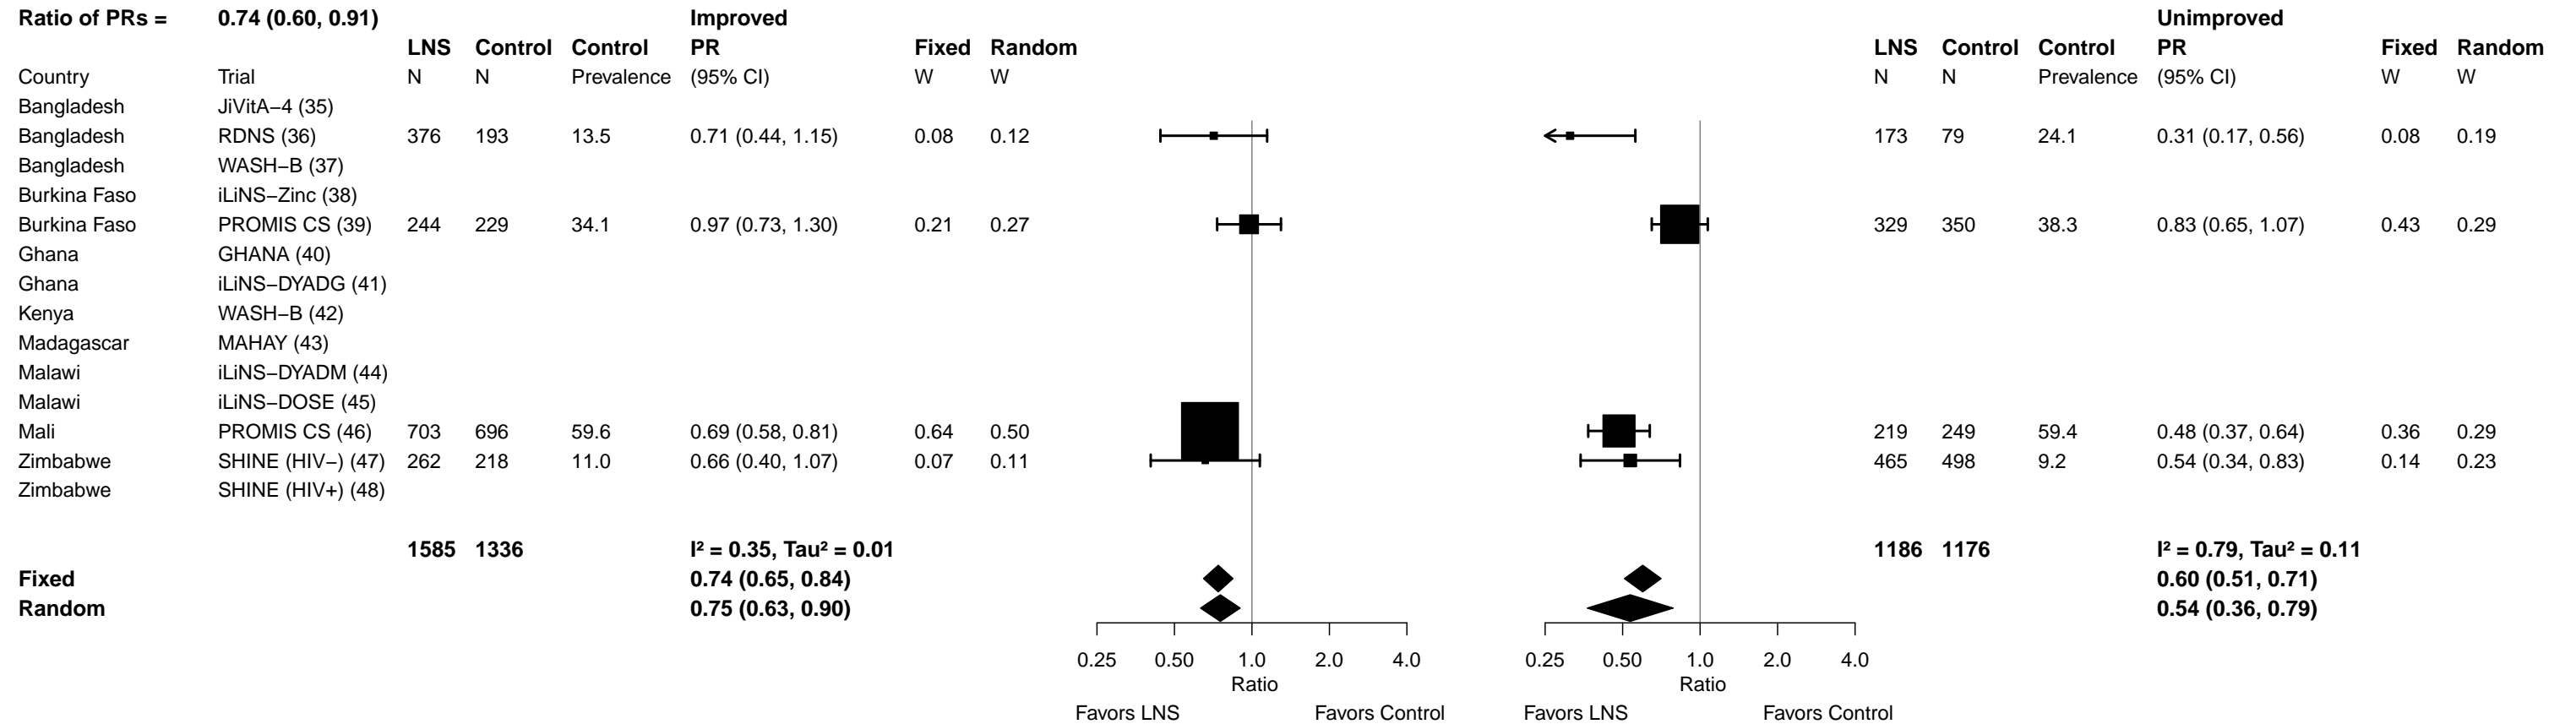

Supplemental figure 7D: Moderate-to-severe anemia prevalence ratio

7D5: Stratified by Season at the time of assessment

P-for-interaction = 0.189

Ratio of PRs = 1.08 (0.96, 1.20)

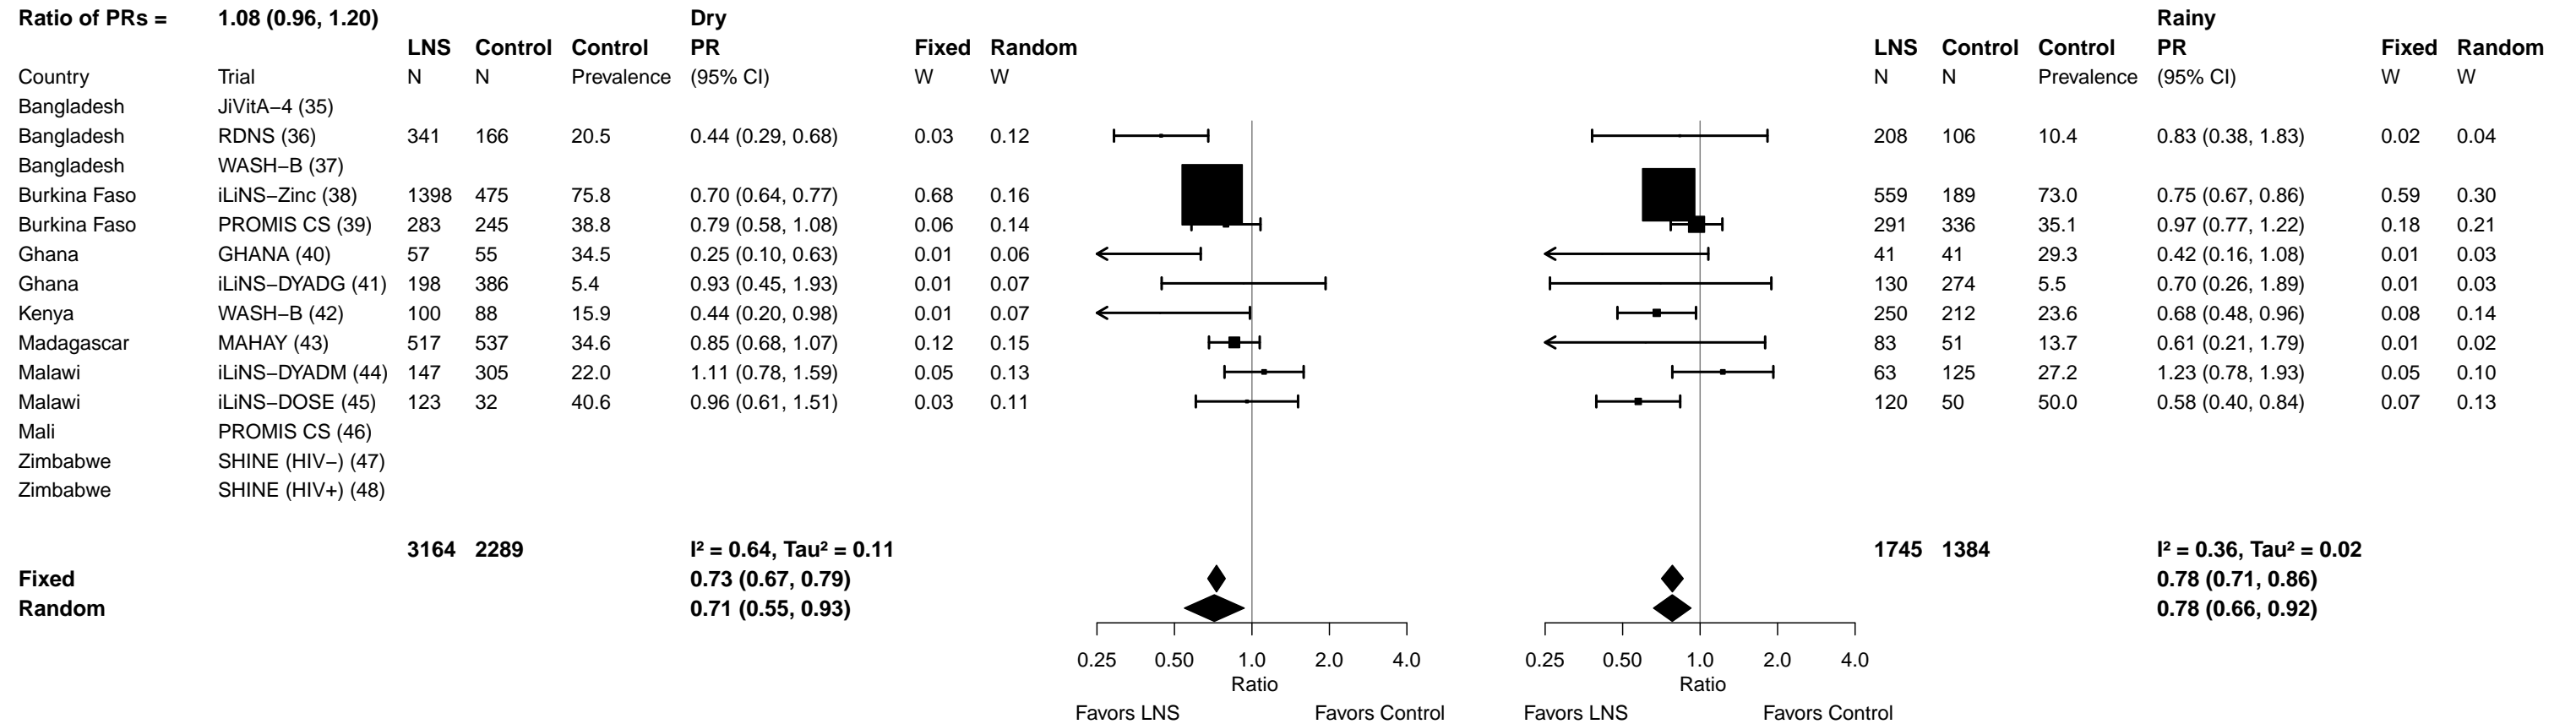



### Supplemental figure 7E: Moderate-to-severe anemia prevalence difference

#### 7E1: Stratified by Household socio-economic status

**P-for-interaction = 0.490**

**Difference in PDs = -0.01 (-0.03, 0.02)**

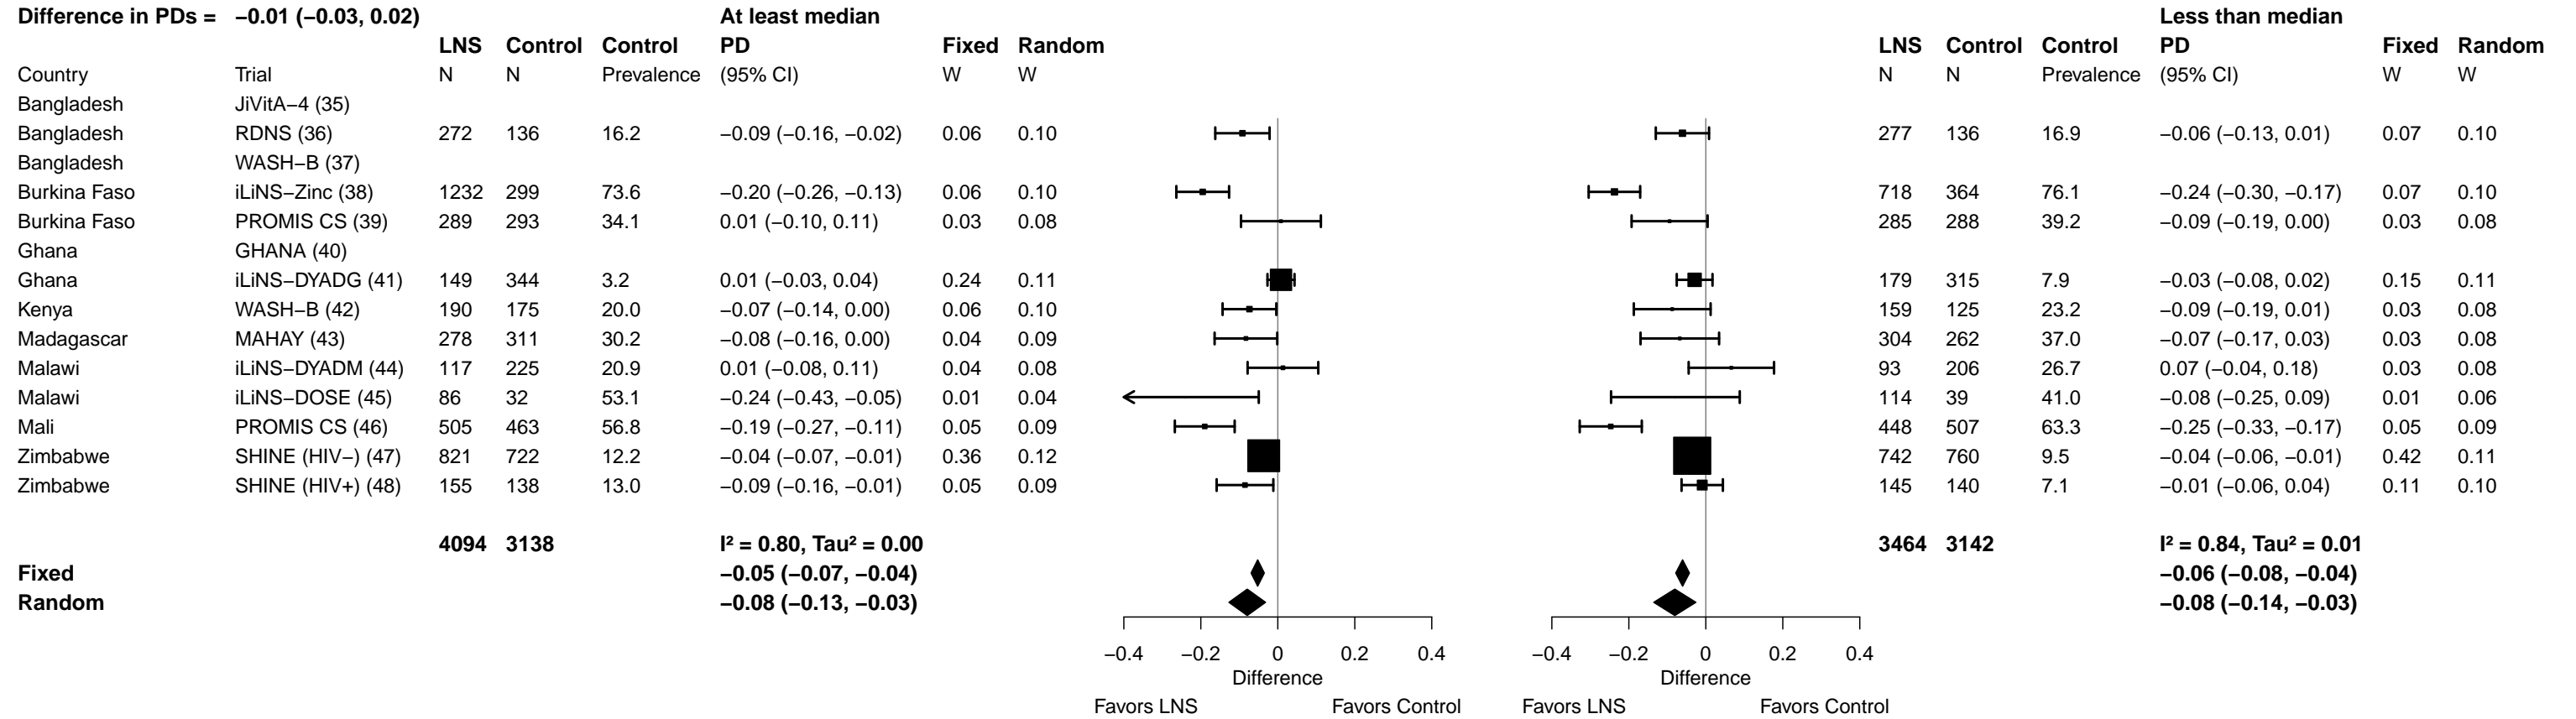

Supplemental figure 7E: Moderate-to-severe anemia prevalence difference

7E2: Stratified by Household food insecurity

P-for-interaction = 0.523

Difference in PDs = -0.01 (-0.05, 0.02)

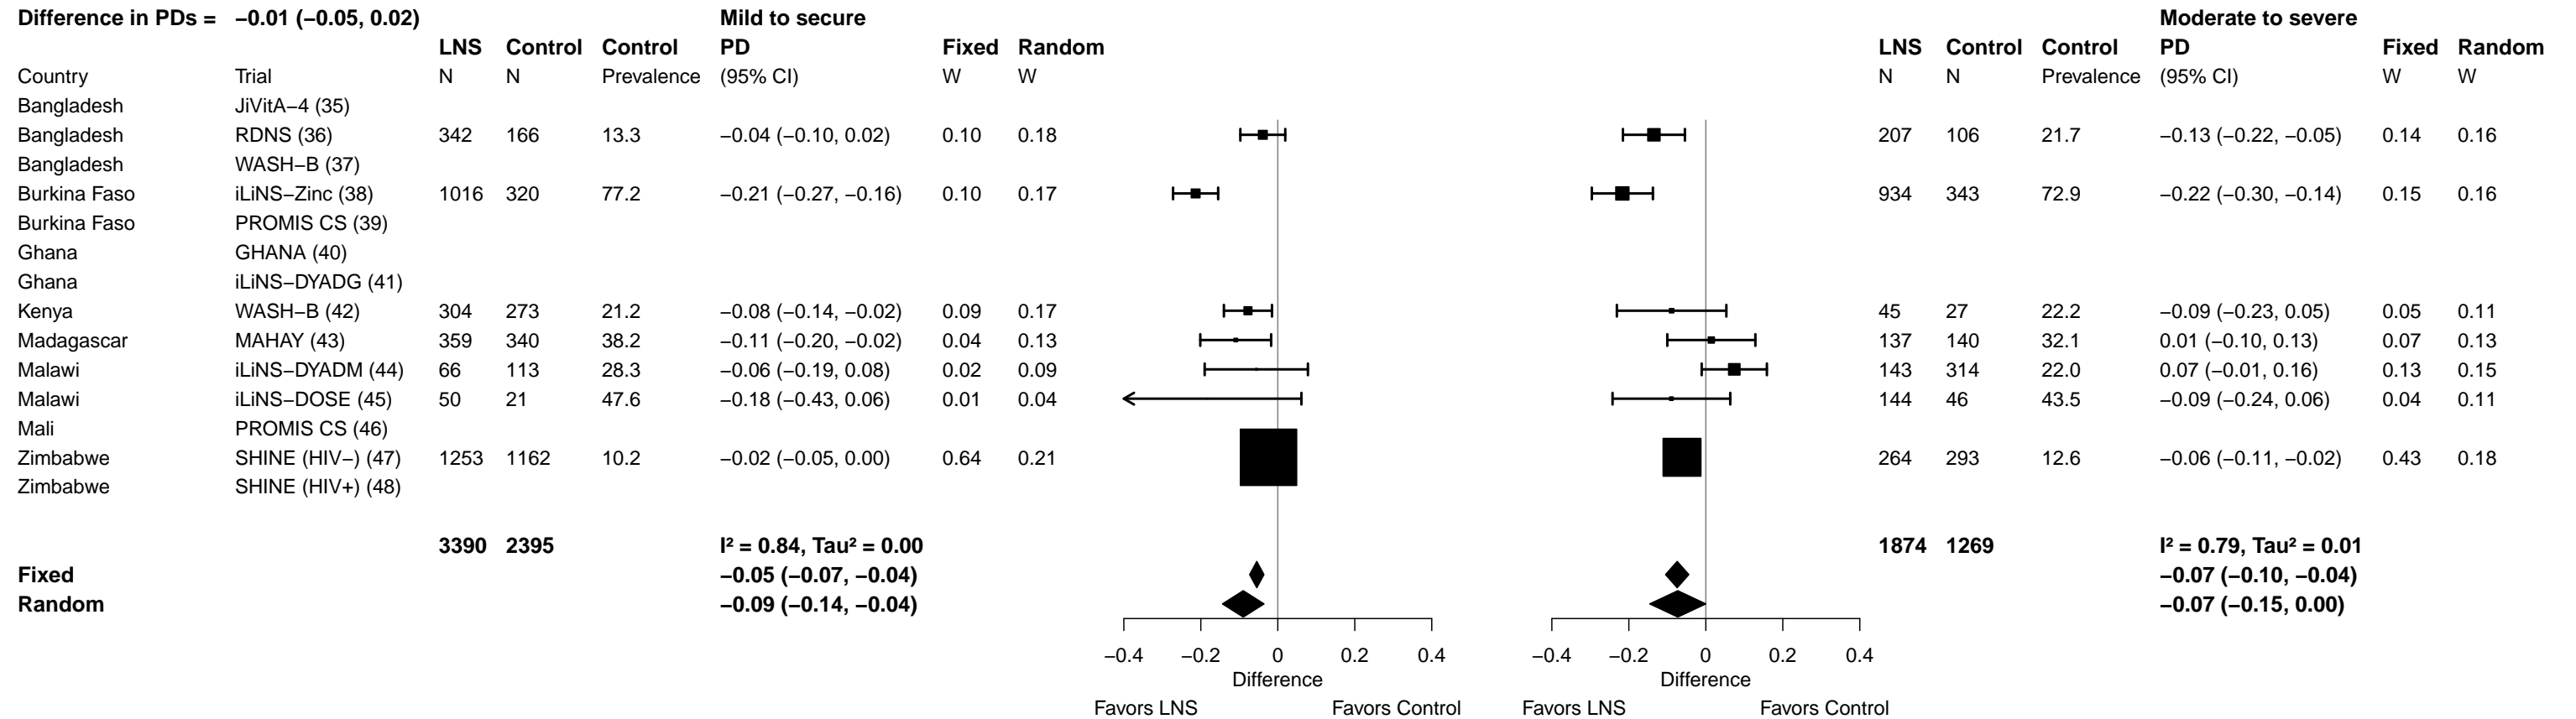

Supplemental figure 7E: Moderate-to-severe anemia prevalence difference

7E3: Stratified by Household source water quality

P-for-interaction = 0.407

Difference in PDs = -0.02 (-0.05, 0.02)

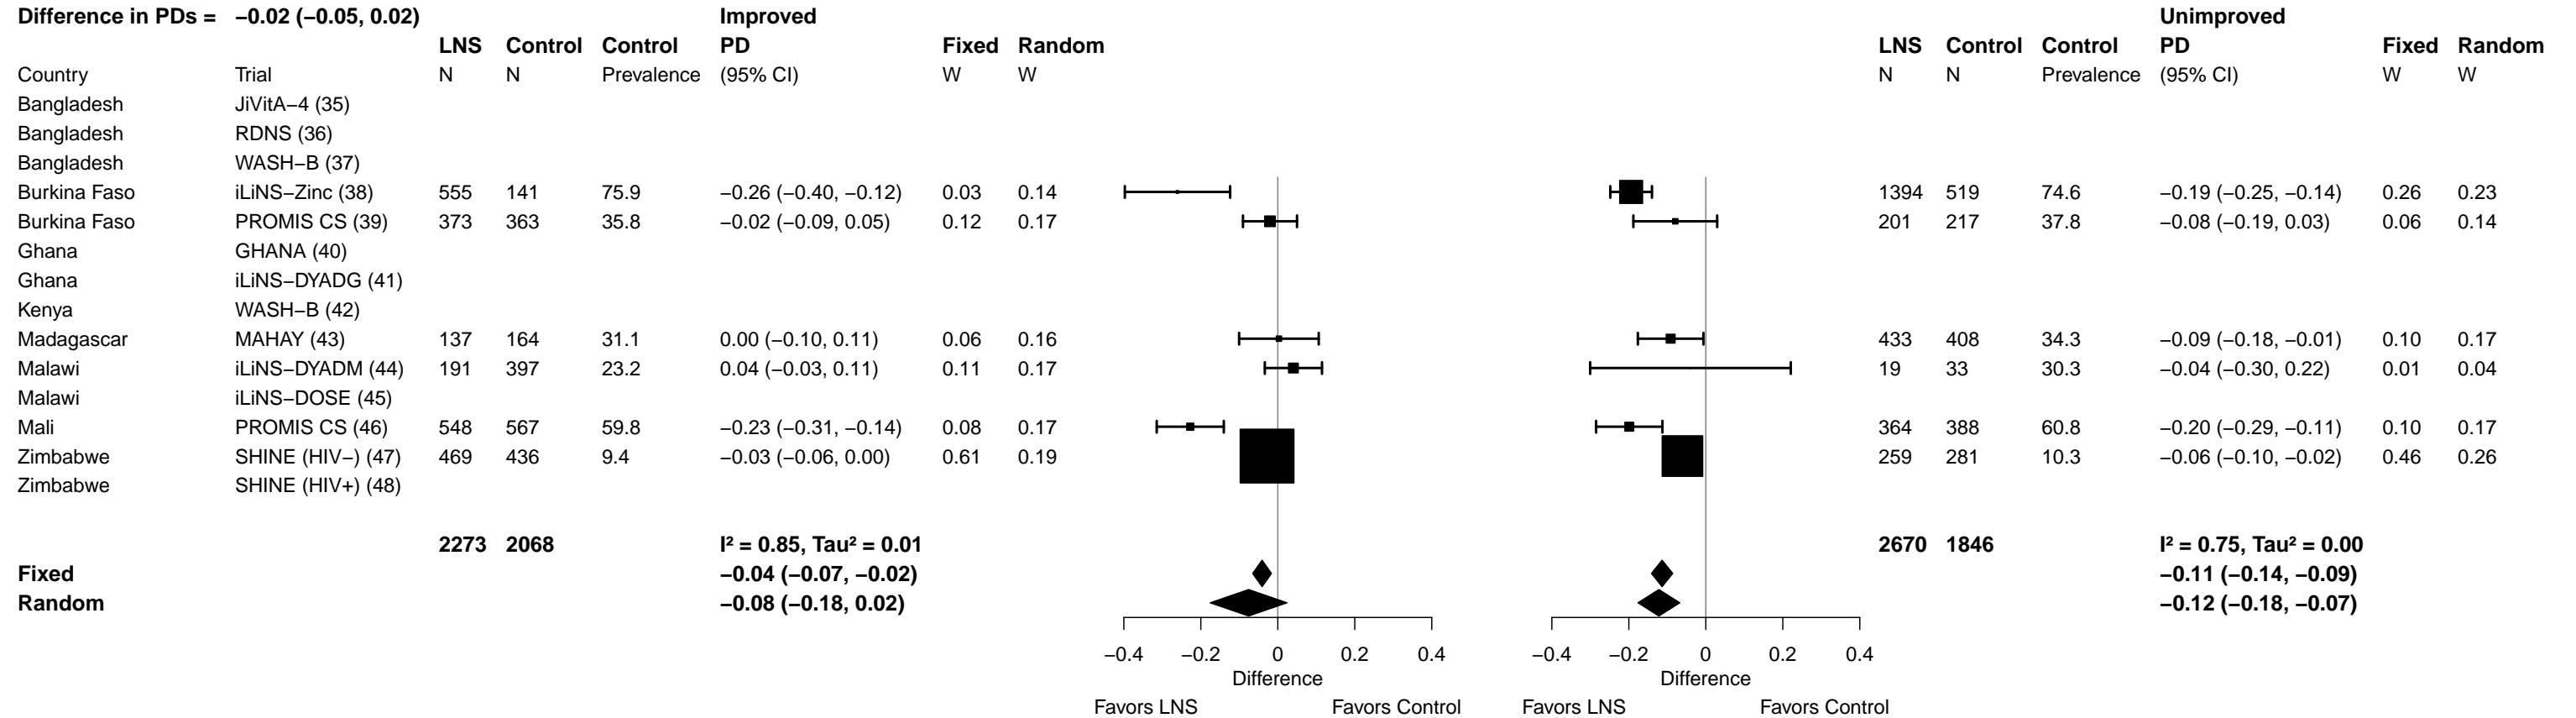

Supplemental figure 7E: Moderate-to-severe anemia prevalence difference

7E4: Stratified by Household sanitation

**P-for-interaction = 0.020**

**Difference in PDs = -0.05 (-0.10, -0.01)**

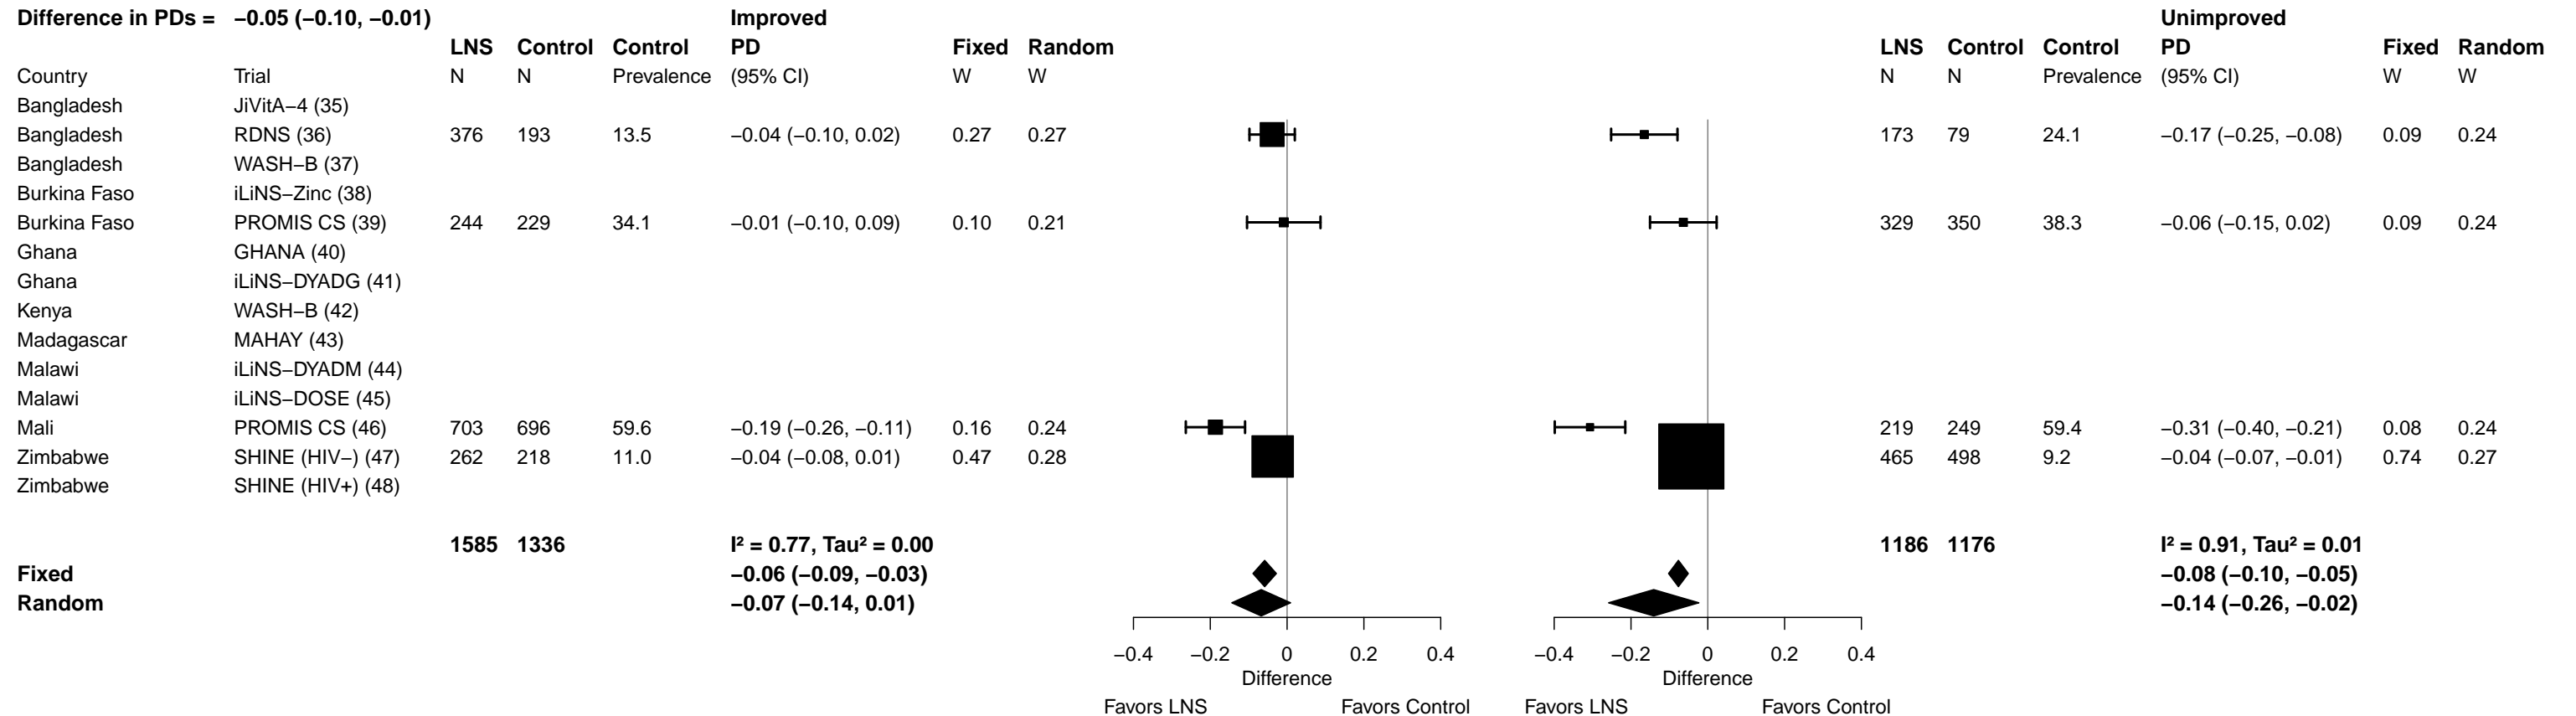

Supplemental figure 7E: Moderate-to-severe anemia prevalence difference

7E5: Stratified by Season at the time of assessment

P-for-interaction = 0.210

Difference in PDs = 0.02 (-0.01, 0.06)

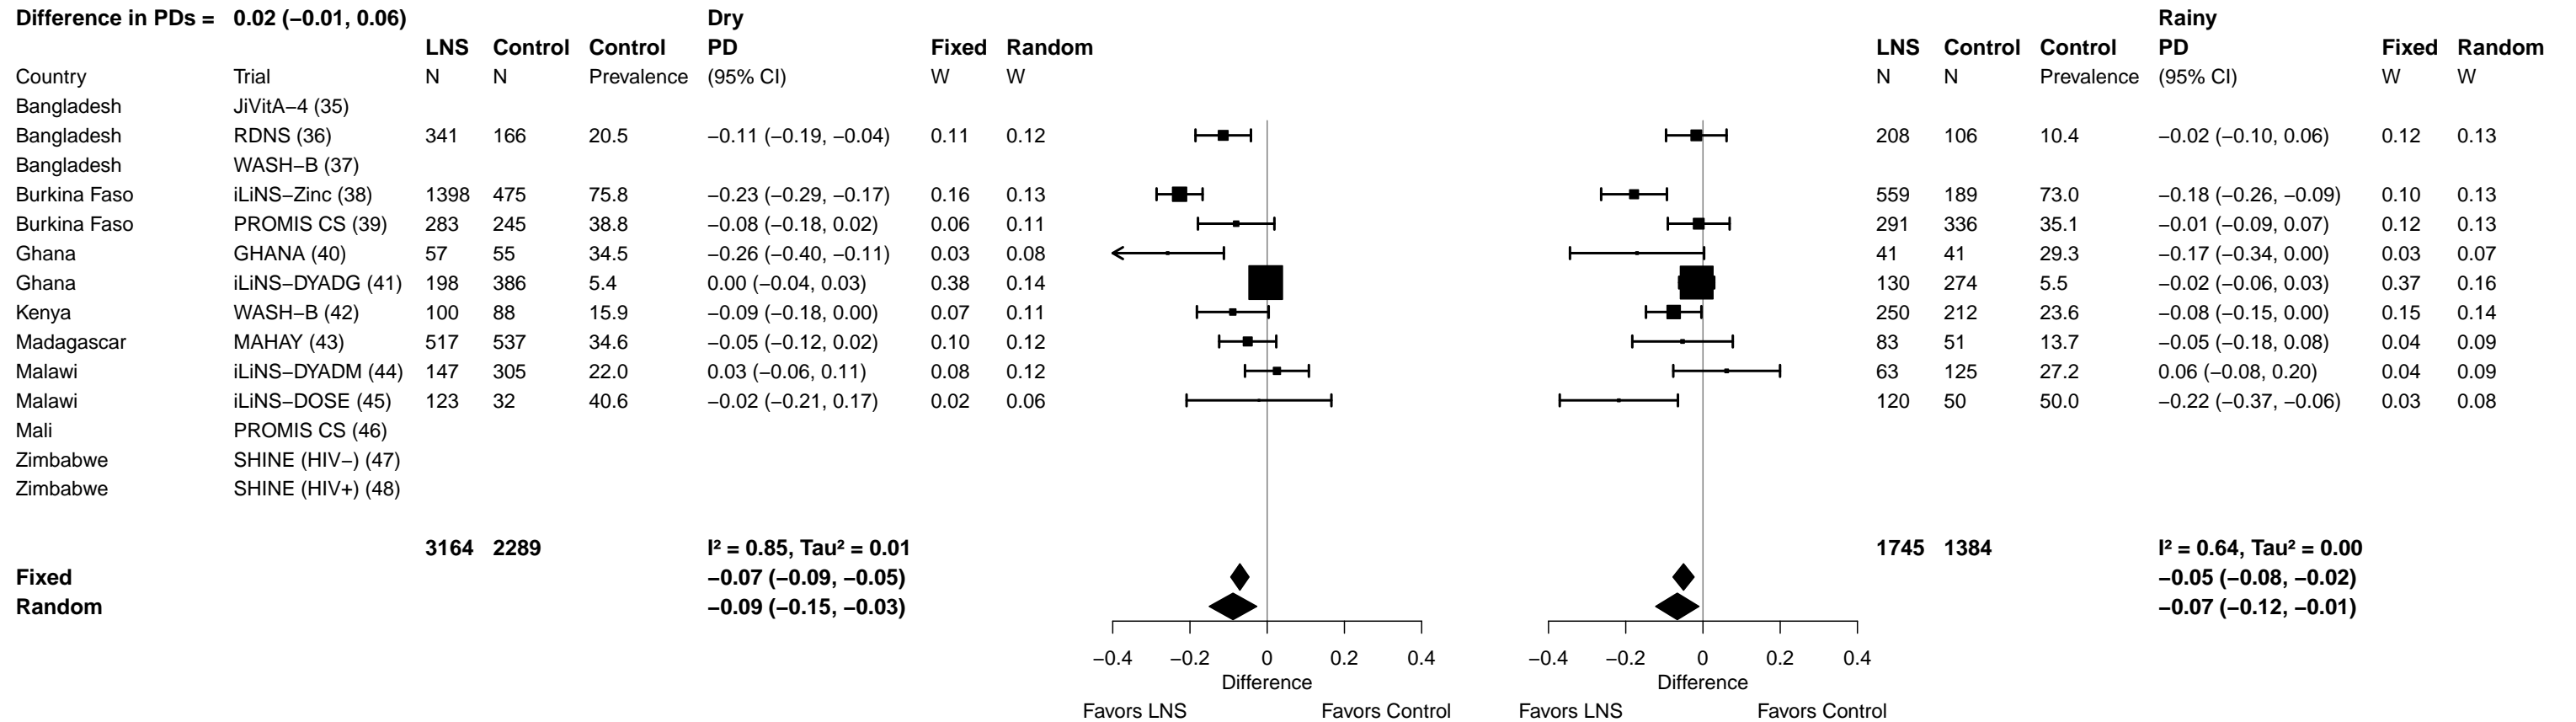

### Supplemental figure 7F: Geometric mean ratio of ferritin concentration

#### 7F1: Stratified by Household socio-economic status

**P-for-interaction = 0.204**  
**Ratio of GMRs = 0.94 (0.86, 1.03)**

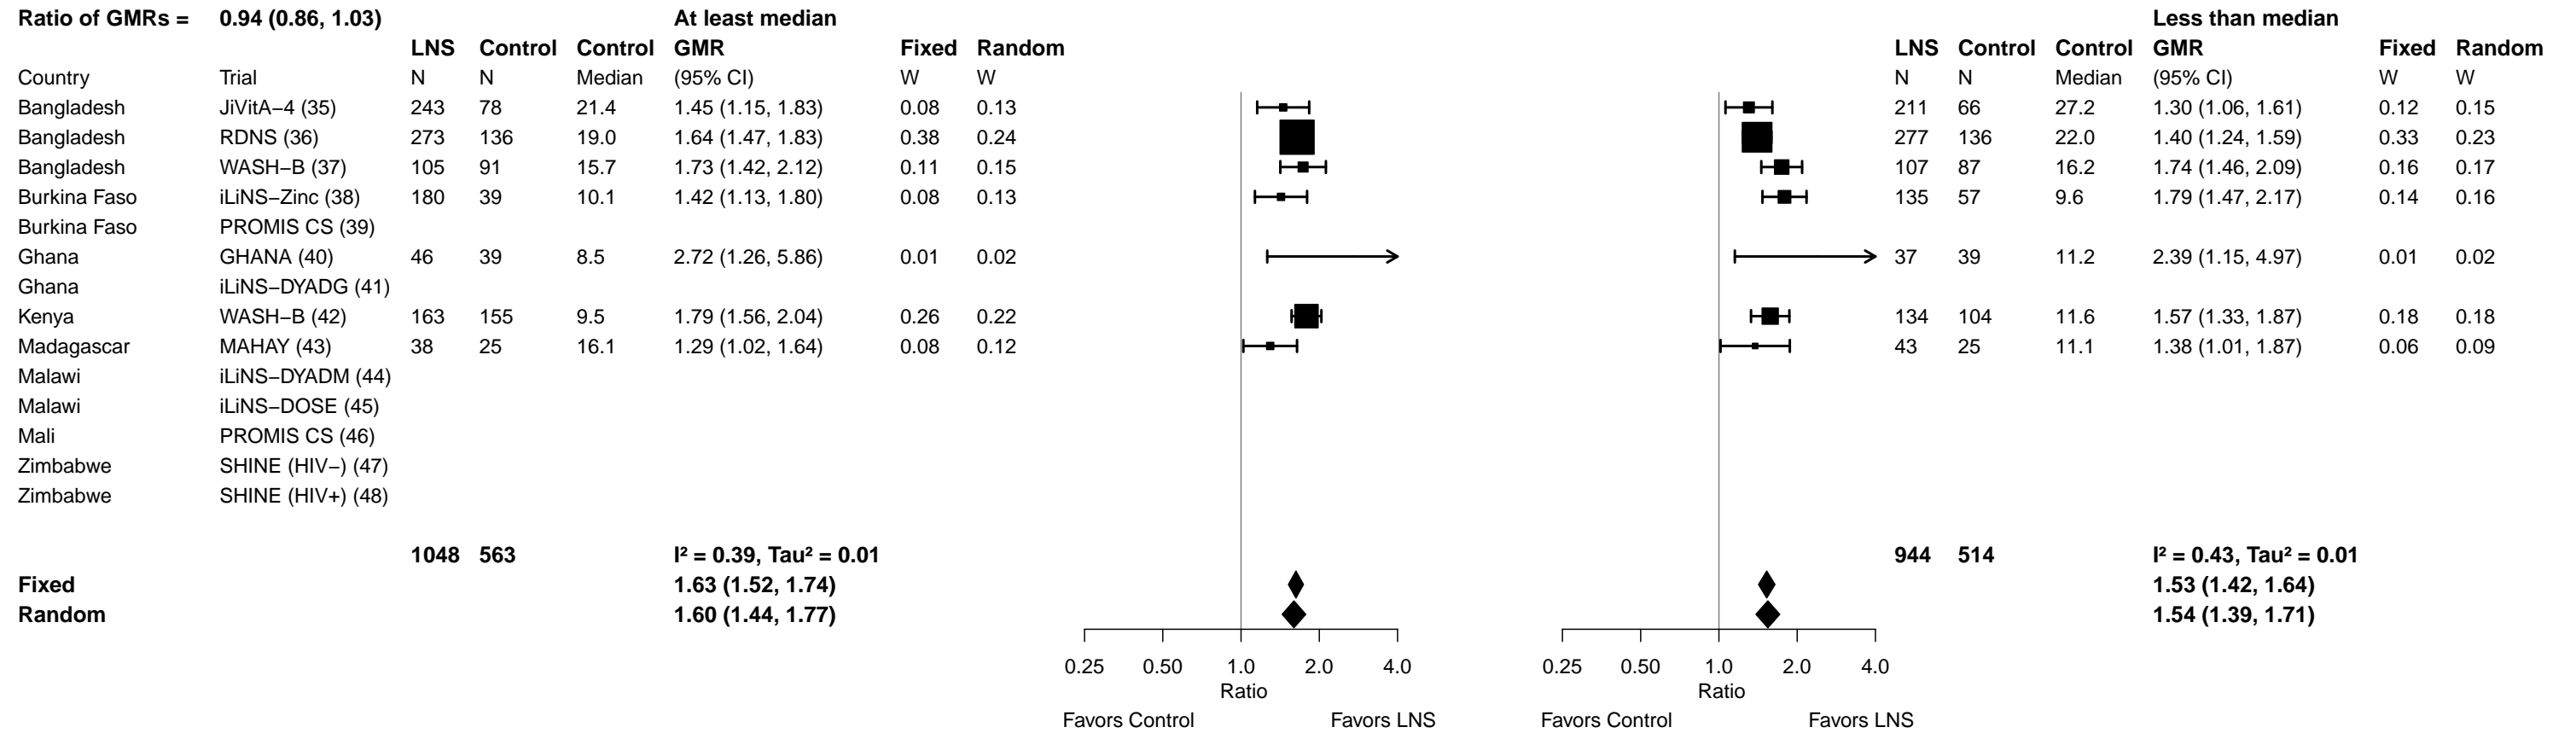

Supplemental figure 7F: Geometric mean ratio of ferritin concentration

7F2: Stratified by Household food insecurity

**P-for-interaction = 0.245**  
**Ratio of GMRs = 0.93 (0.82, 1.05)**

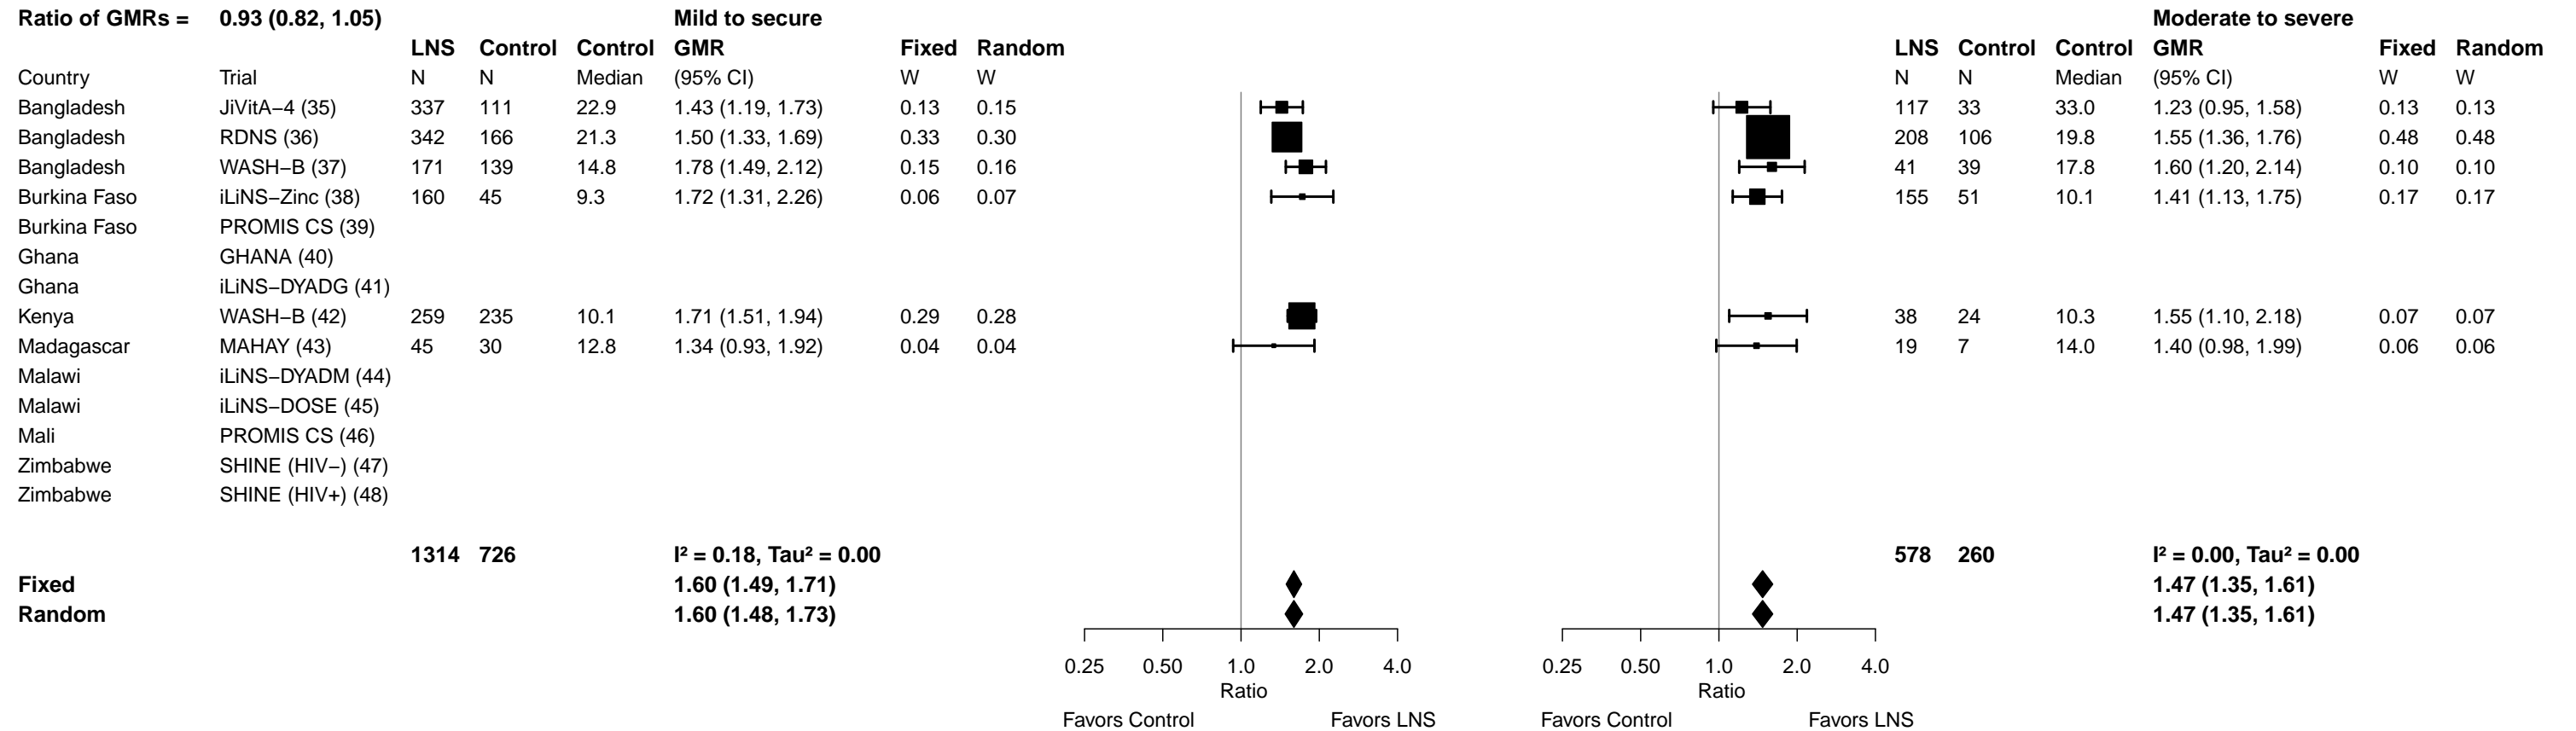

Supplemental figure 7F: Geometric mean ratio of ferritin concentration

7F3: Stratified by Household source water quality

**P-for-interaction = 0.408**  
**Ratio of GMRs = 0.93 (0.78, 1.11)**

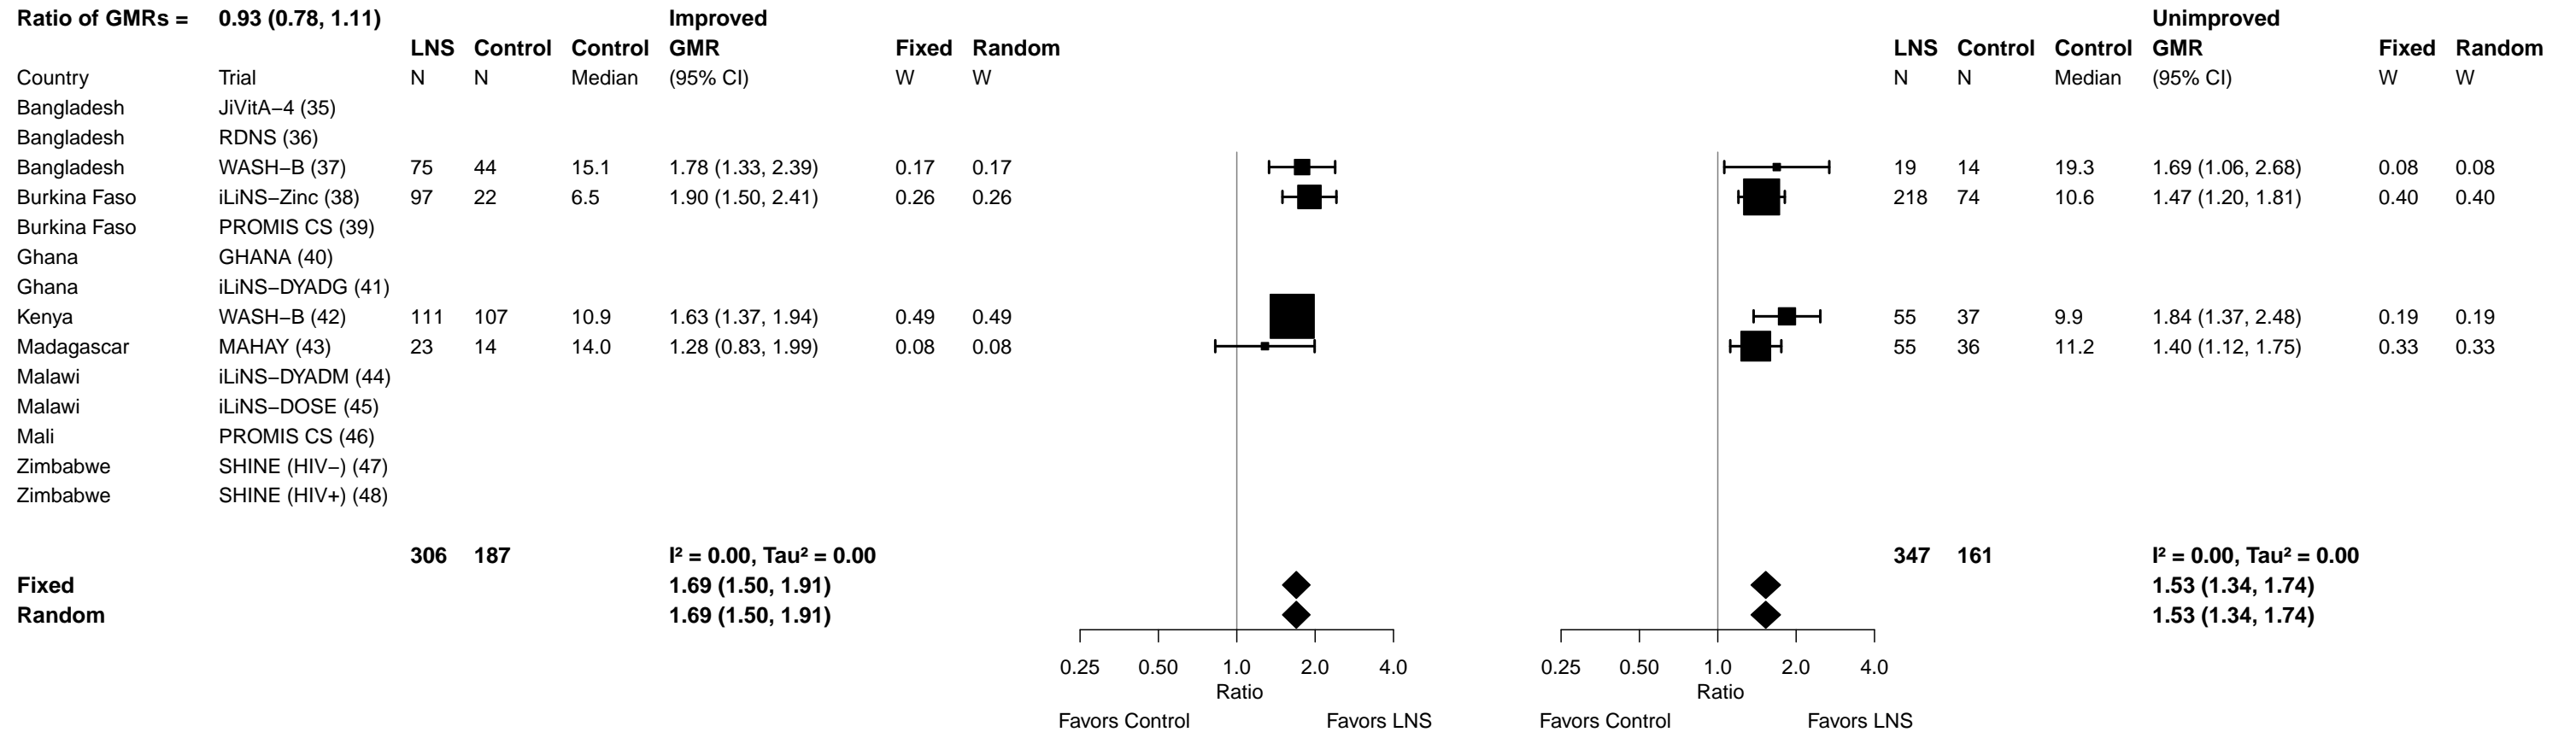



Supplemental figure 7F: Geometric mean ratio of ferritin concentration

7F4: Stratified by Household sanitation

**P-for-interaction = 0.512**  
**Ratio of GMRs = 1.05 (0.90, 1.23)**

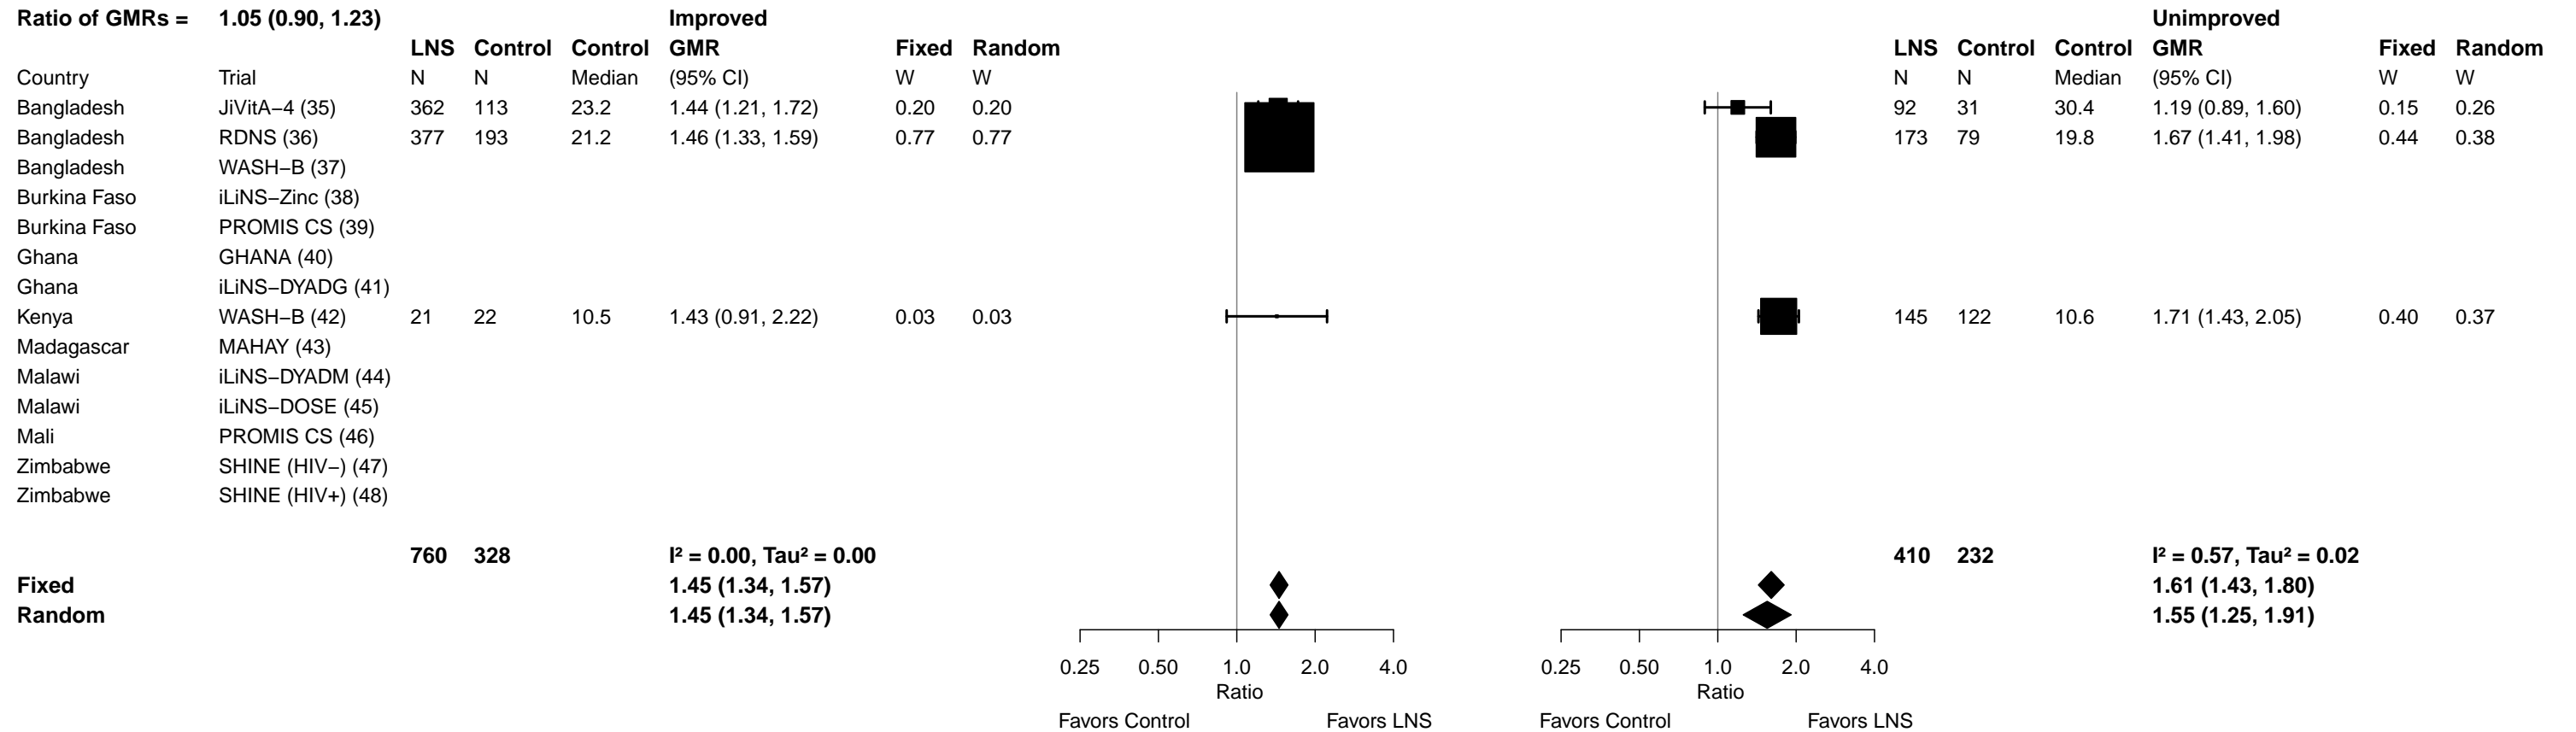

Supplemental figure 7F: Geometric mean ratio of ferritin concentration

7F5: Stratified by Season at the time of assessment

P-for-interaction = 0.012

Ratio of GMRs = 1.13 (1.03, 1.25)

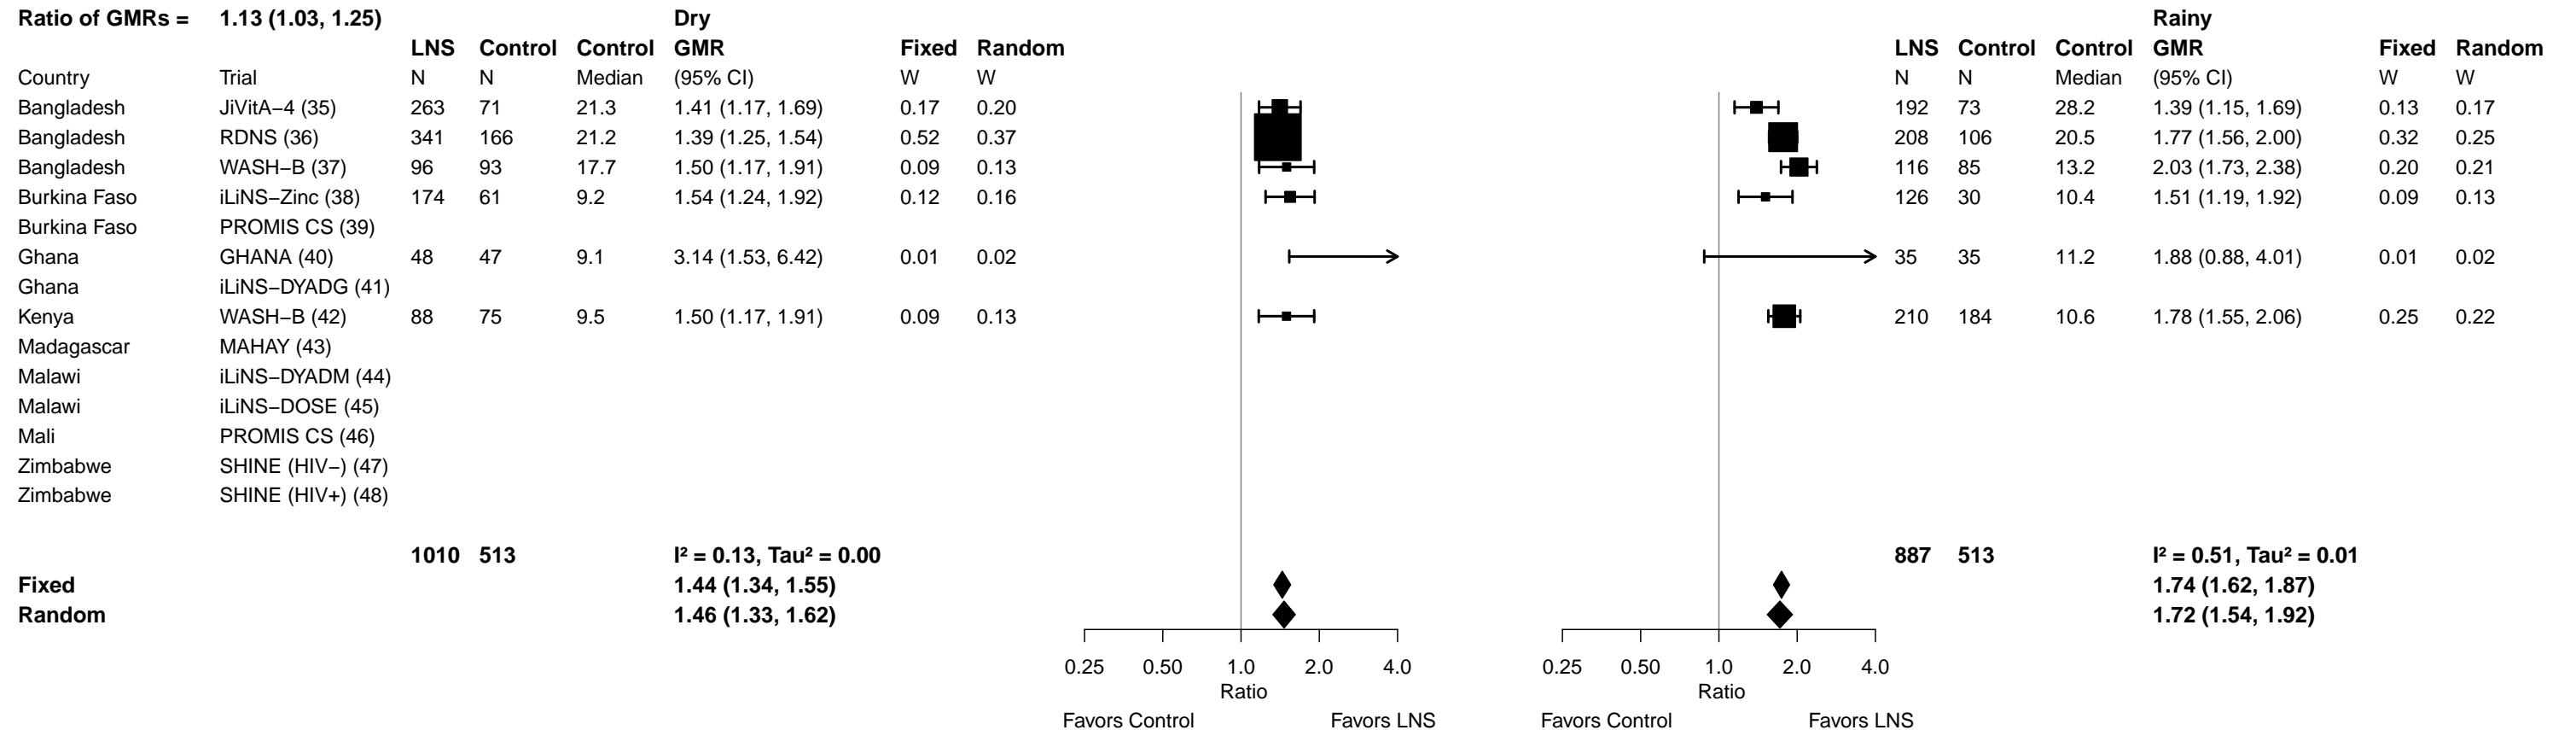

### Supplemental figure 7G: Iron deficiency (ferritin < 12 µg/L) prevalence ratio

#### 7G1: Stratified by Household socio-economic status

**P-for-interaction = 0.847**

**Ratio of PRs = 0.98 (0.78, 1.23)**

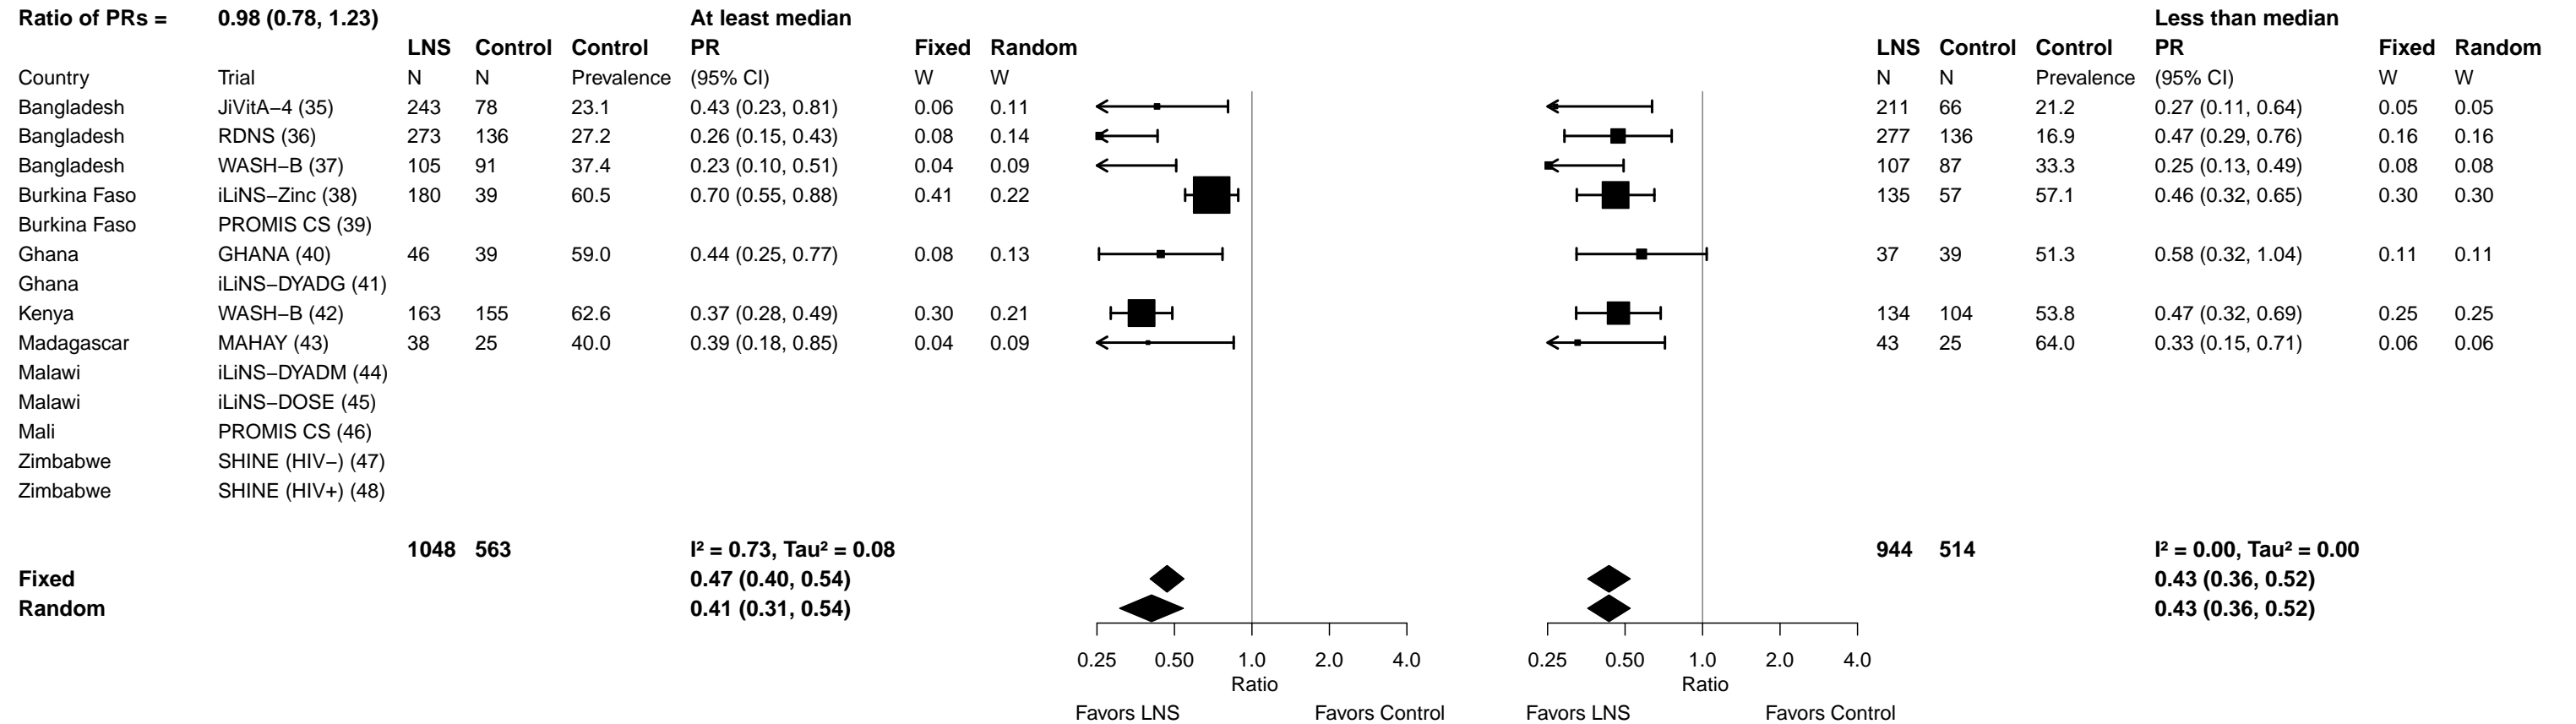

Supplemental figure 7G: Iron deficiency (ferritin < 12 µg/L) prevalence ratio

7G2: Stratified by Household food insecurity

P-for-interaction = 0.859

Ratio of PRs = 1.03 (0.77, 1.38)

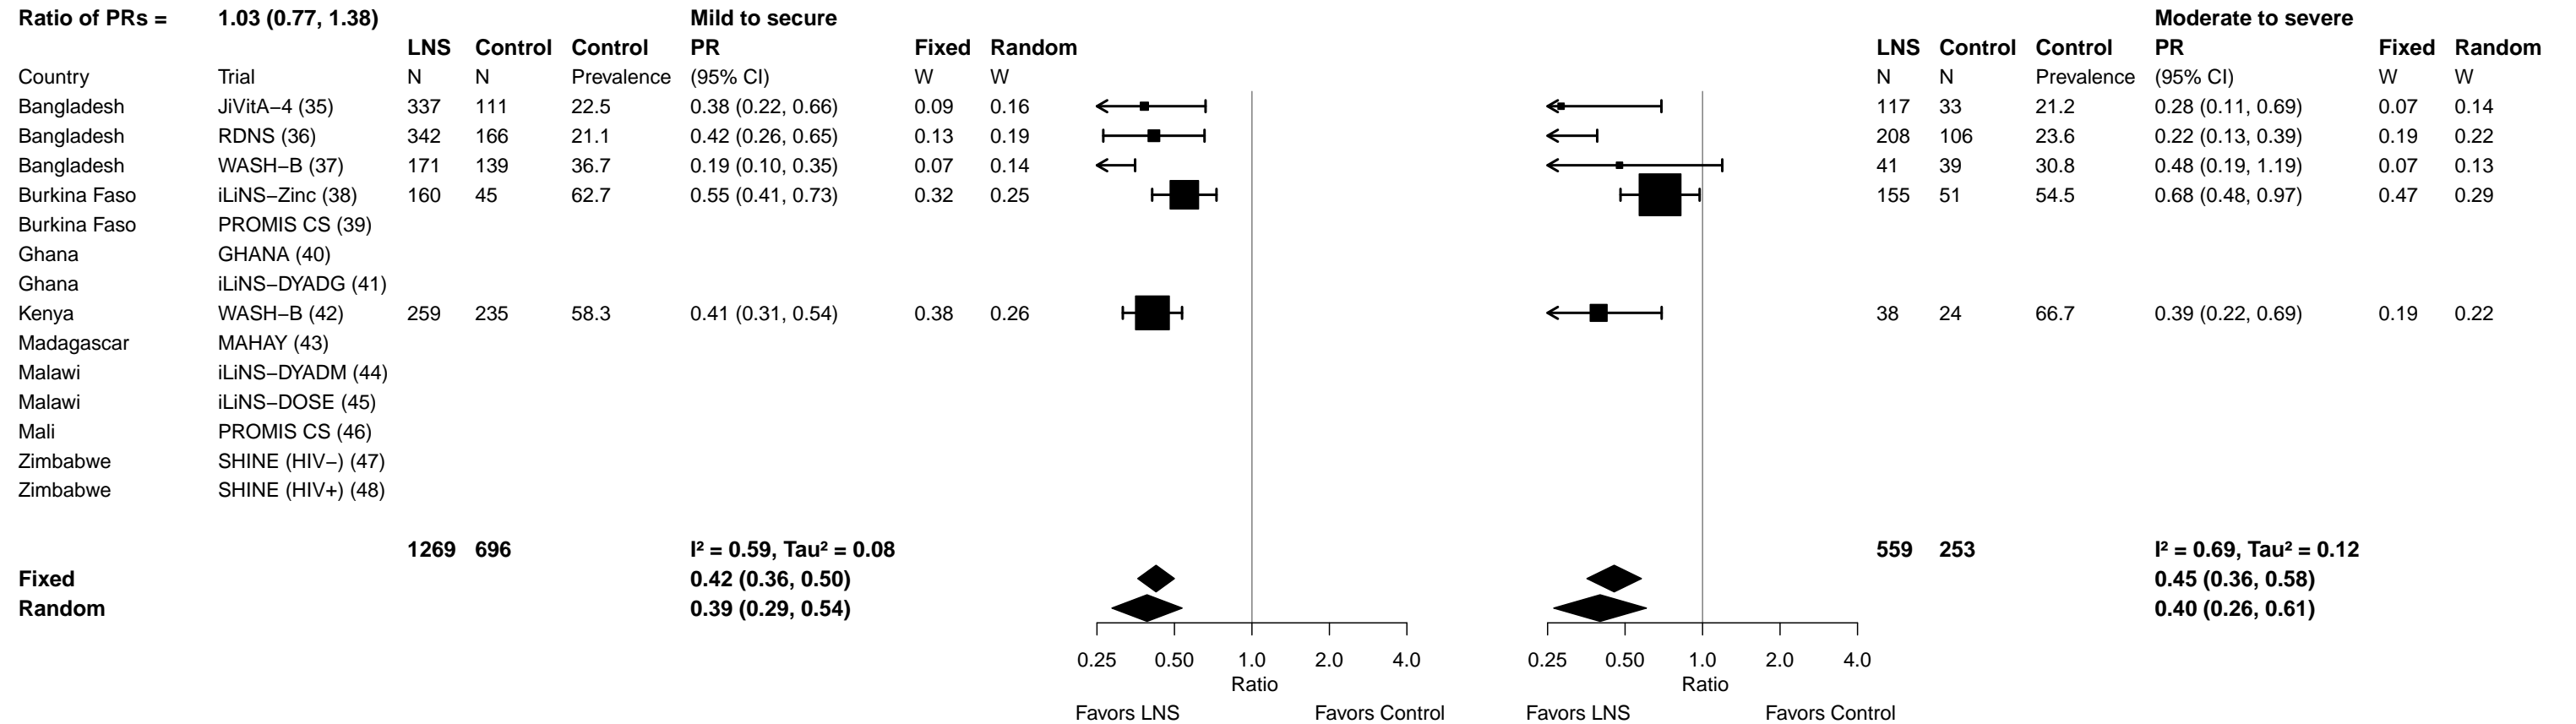

Supplemental figure 7G: Iron deficiency (ferritin < 12 µg/L) prevalence ratio

7G3: Stratified by Household source water quality

**P-for-interaction = 0.976**  
**Ratio of PRs = 1.00 (0.78, 1.29)**

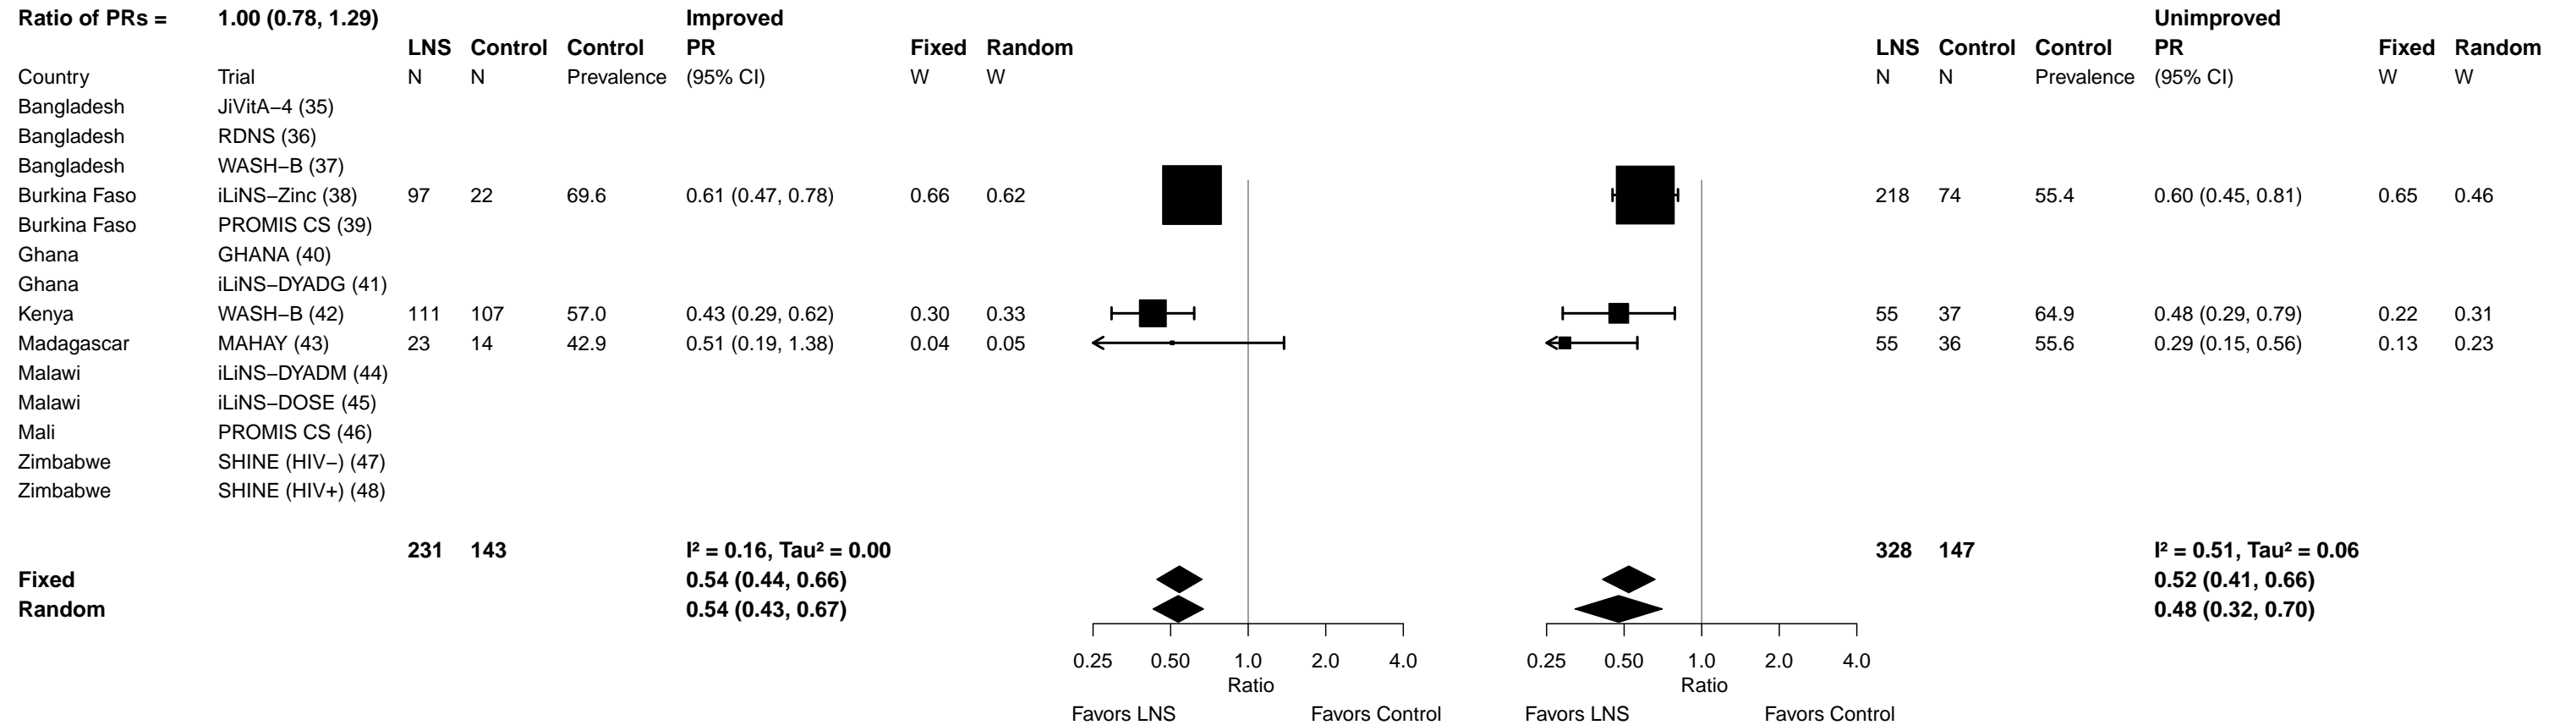

**Supplemental figure 7G: Iron deficiency (ferritin < 12 µg/L) prevalence ratio**

**7G4: Stratified by Household sanitation (insufficient comparisons)**

Supplemental figure 7G: Iron deficiency (ferritin < 12 µg/L) prevalence ratio

7G5: Stratified by Season at the time of assessment

**P-for-interaction = 0.002**

**Ratio of PRs = 0.68 (0.53, 0.87)**

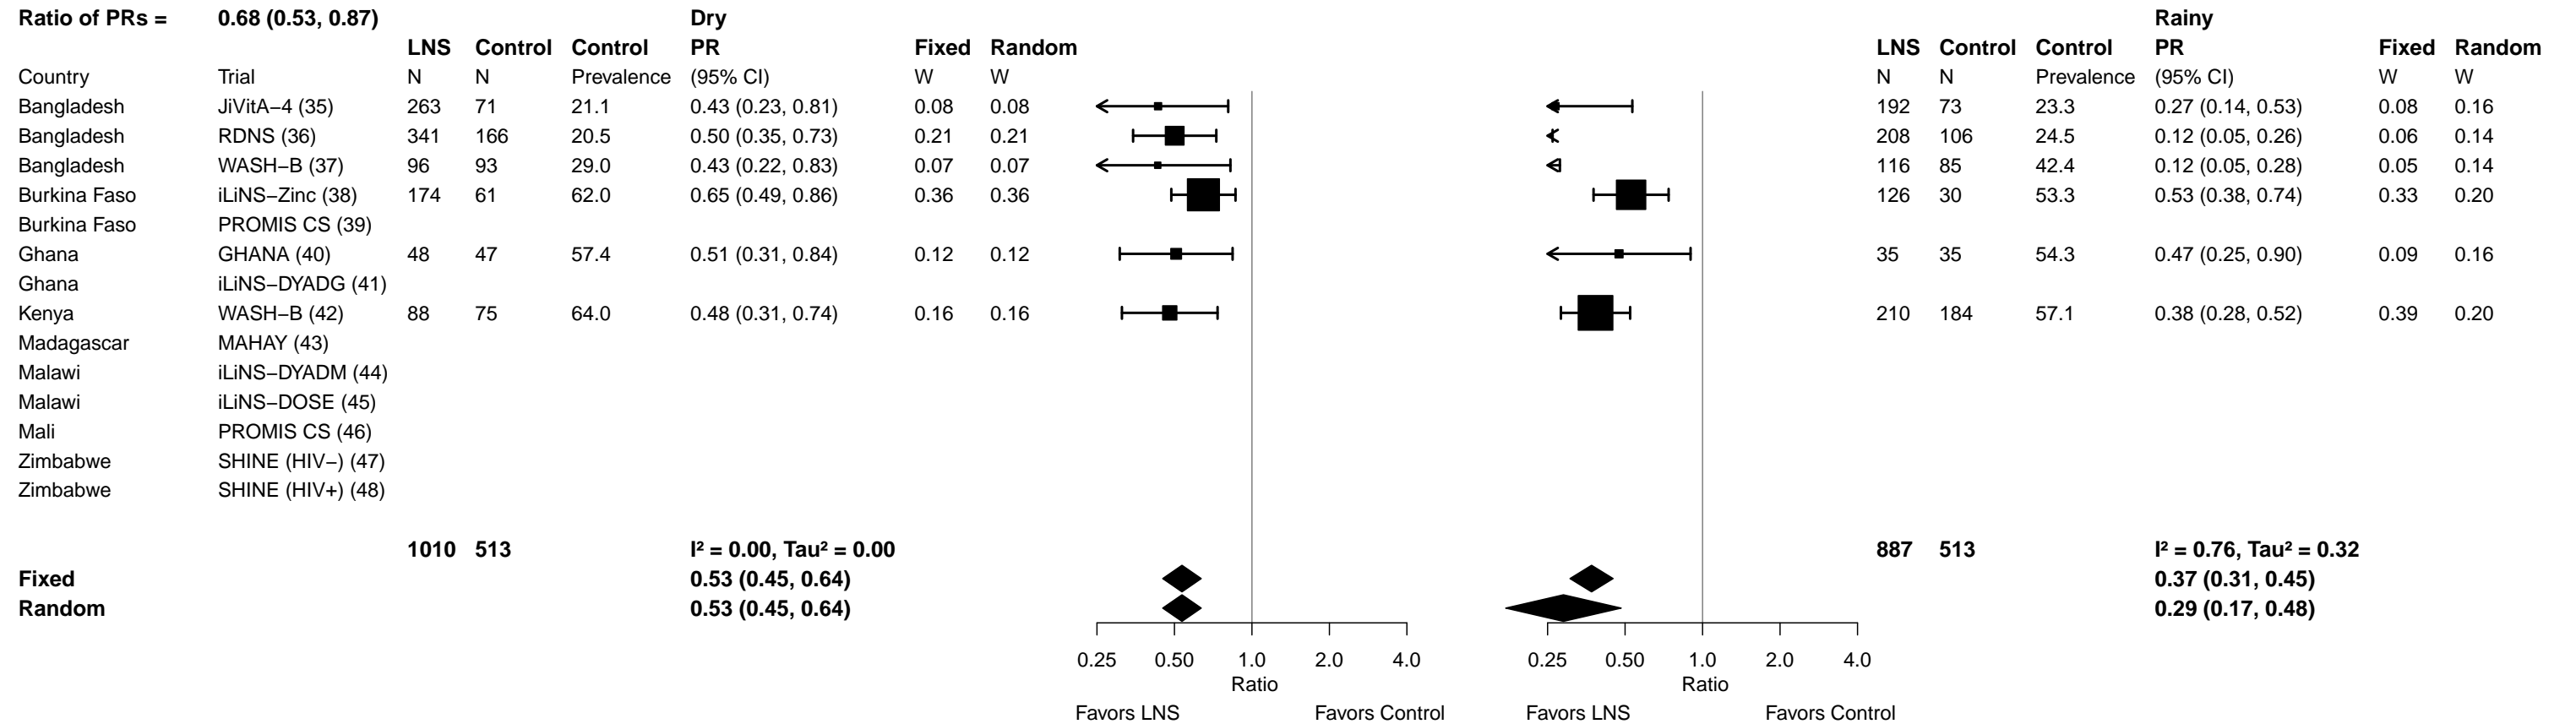

### Supplemental figure 7H: Iron deficiency (ferritin < 12 µg/L) prevalence difference

#### 7H1: Stratified by Household socio-economic status

P-for-interaction = 0.158

Difference in PDs = 0.05 (-0.02, 0.11)

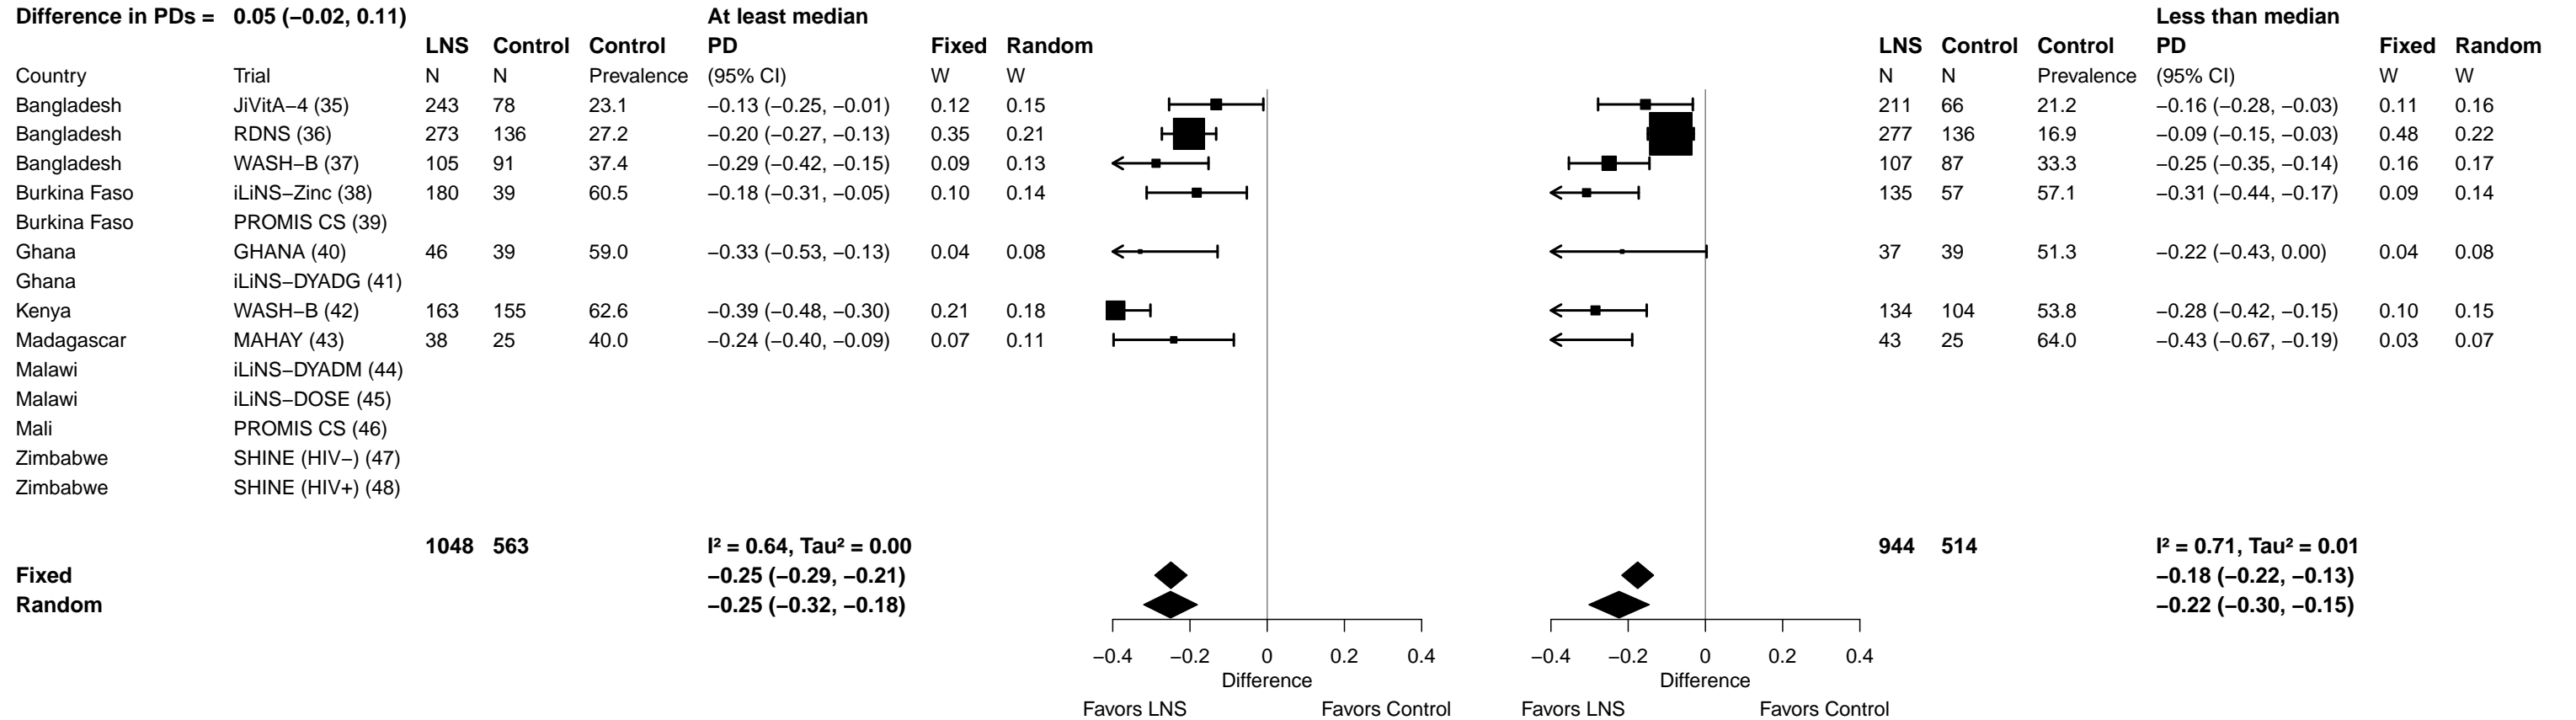



Supplemental figure 7H: Iron deficiency (ferritin < 12 µg/L) prevalence difference

7H2: Stratified by Household food insecurity

P-for-interaction = 0.908

Difference in PDs = 0.00 (-0.08, 0.07)

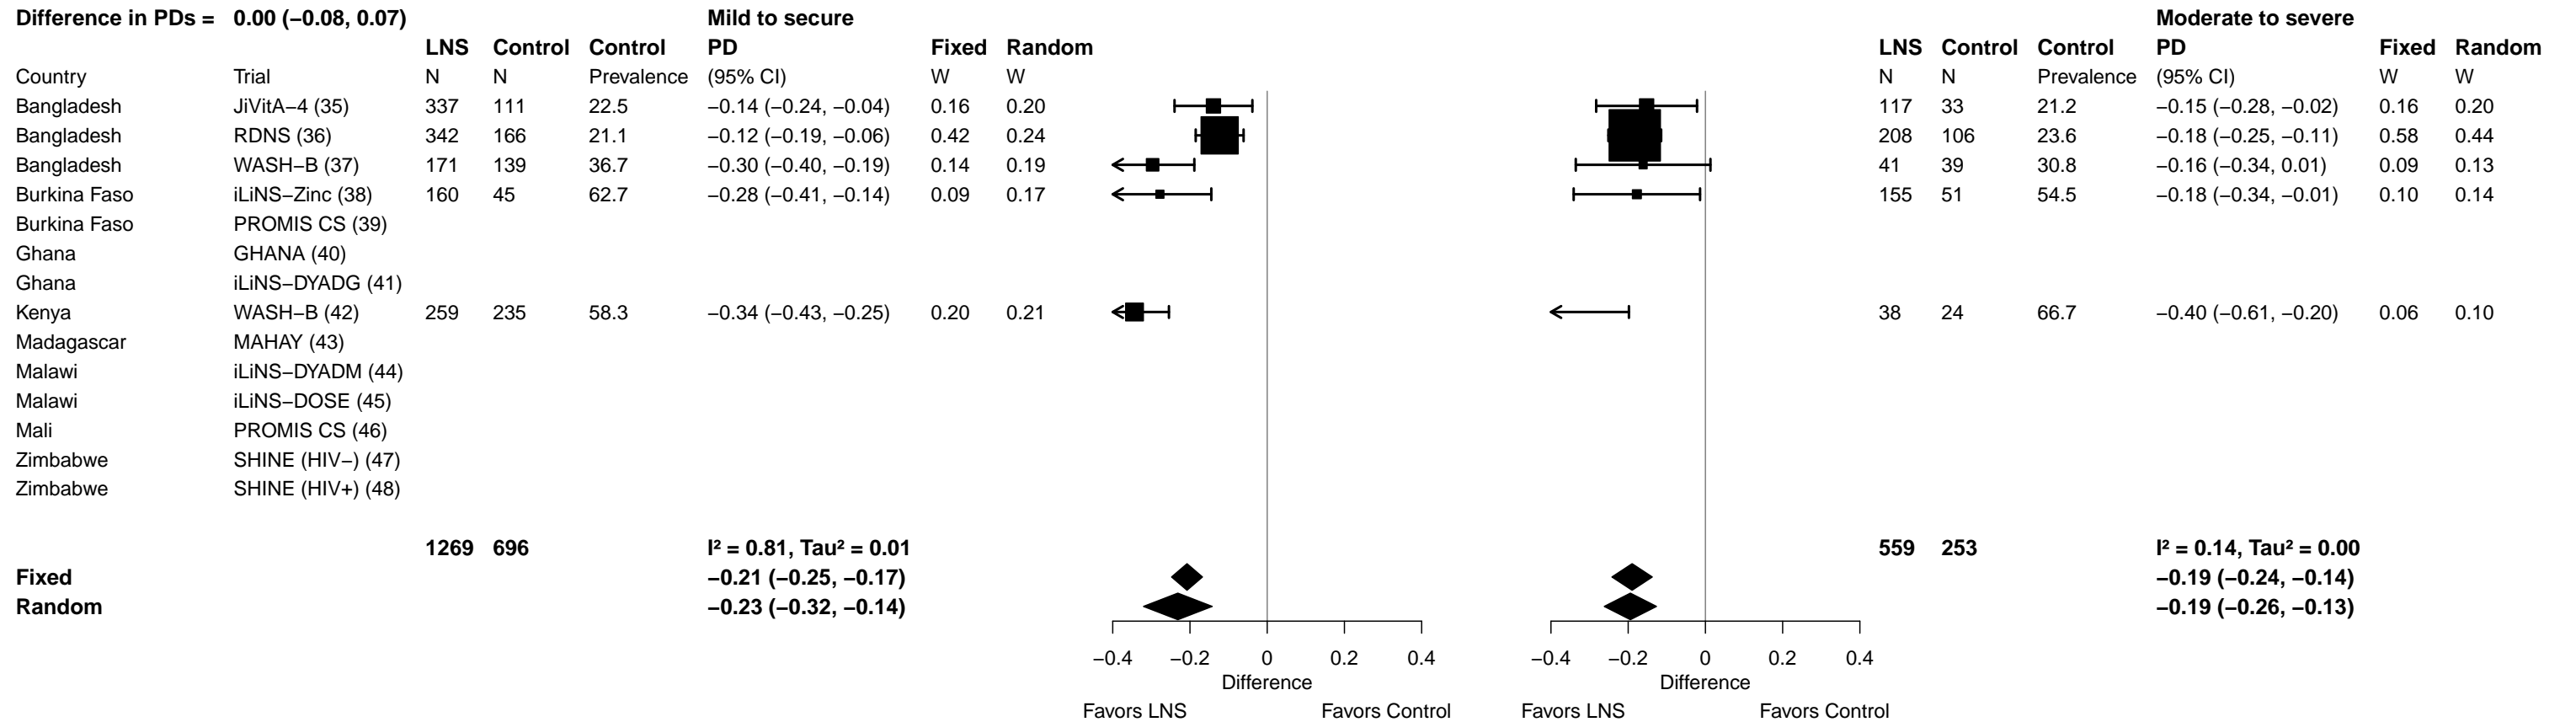

Supplemental figure 7H: Iron deficiency (ferritin < 12 µg/L) prevalence difference

7H3: Stratified by Household source water quality

P-for-interaction = 0.948

Difference in PDs = -0.01 (-0.16, 0.15)

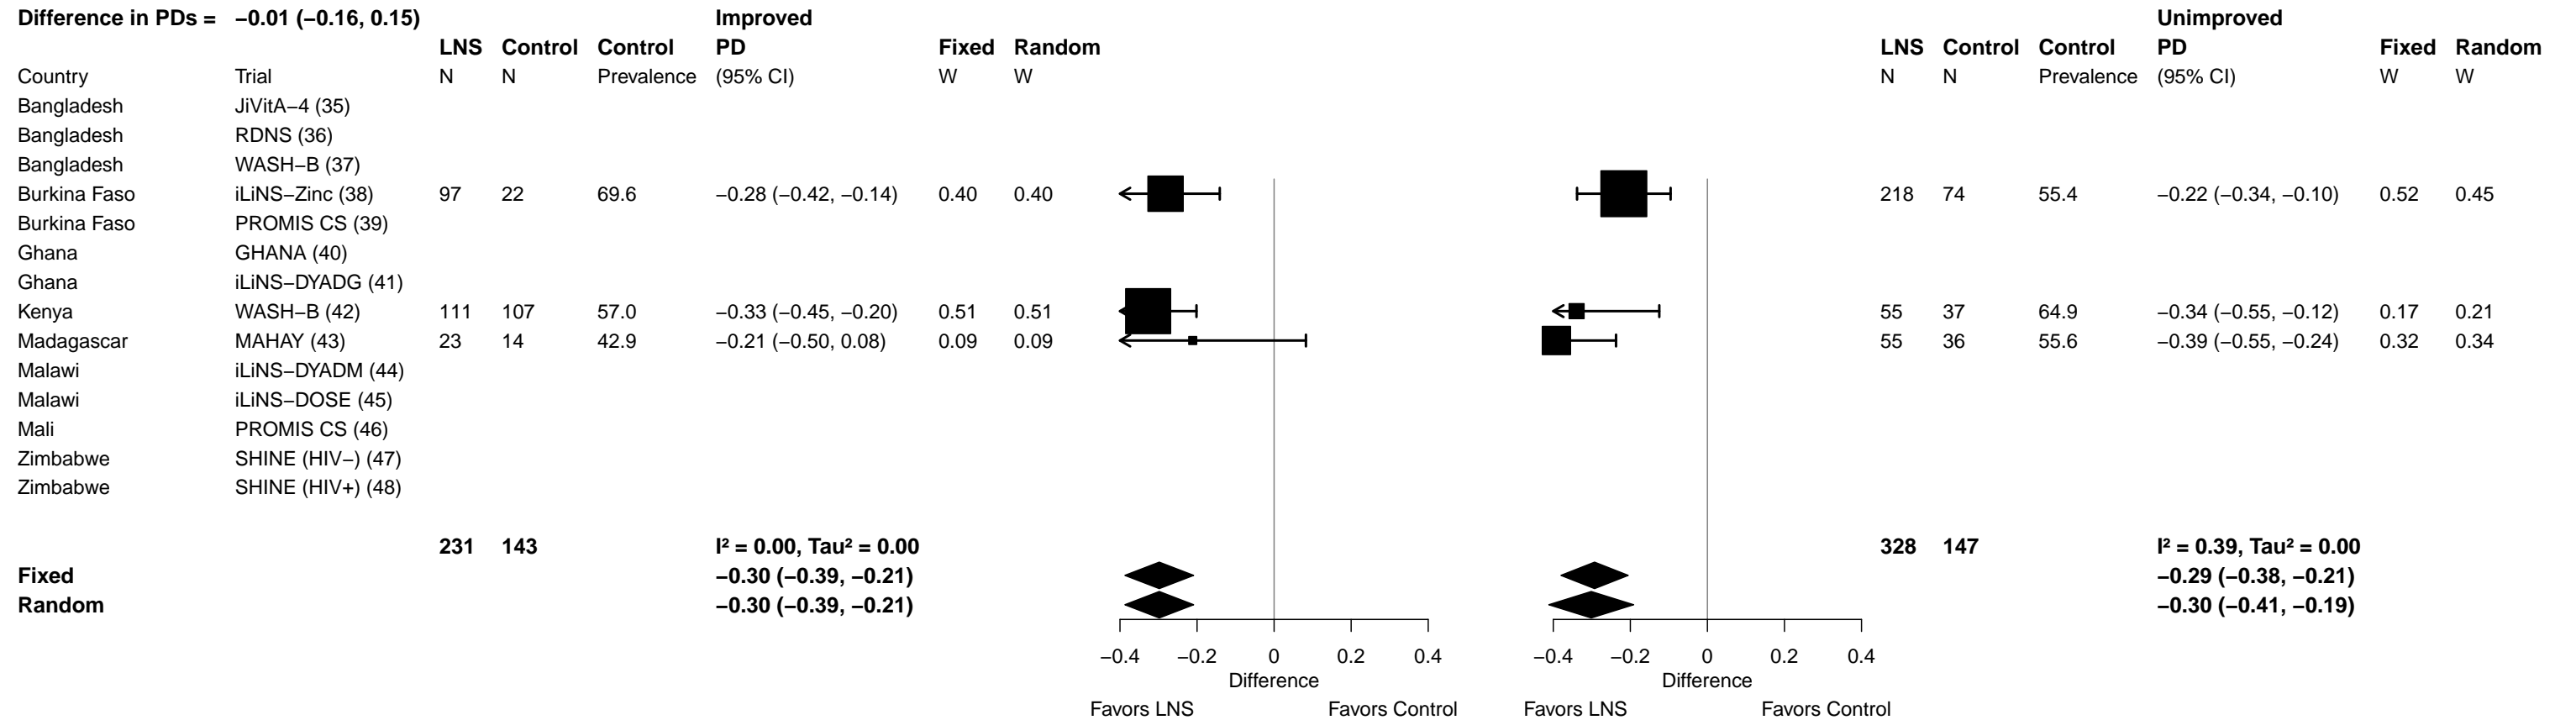

**Supplemental figure 7H: Iron deficiency (ferritin < 12 µg/L) prevalence difference**

**7H4: Stratified by Household sanitation (insufficient comparisons)**

Supplemental figure 7H: Iron deficiency (ferritin < 12 µg/L) prevalence difference

7H5: Stratified by Season at the time of assessment

P-for-interaction = 0.007

Difference in PDs = -0.09 (-0.16, -0.02)

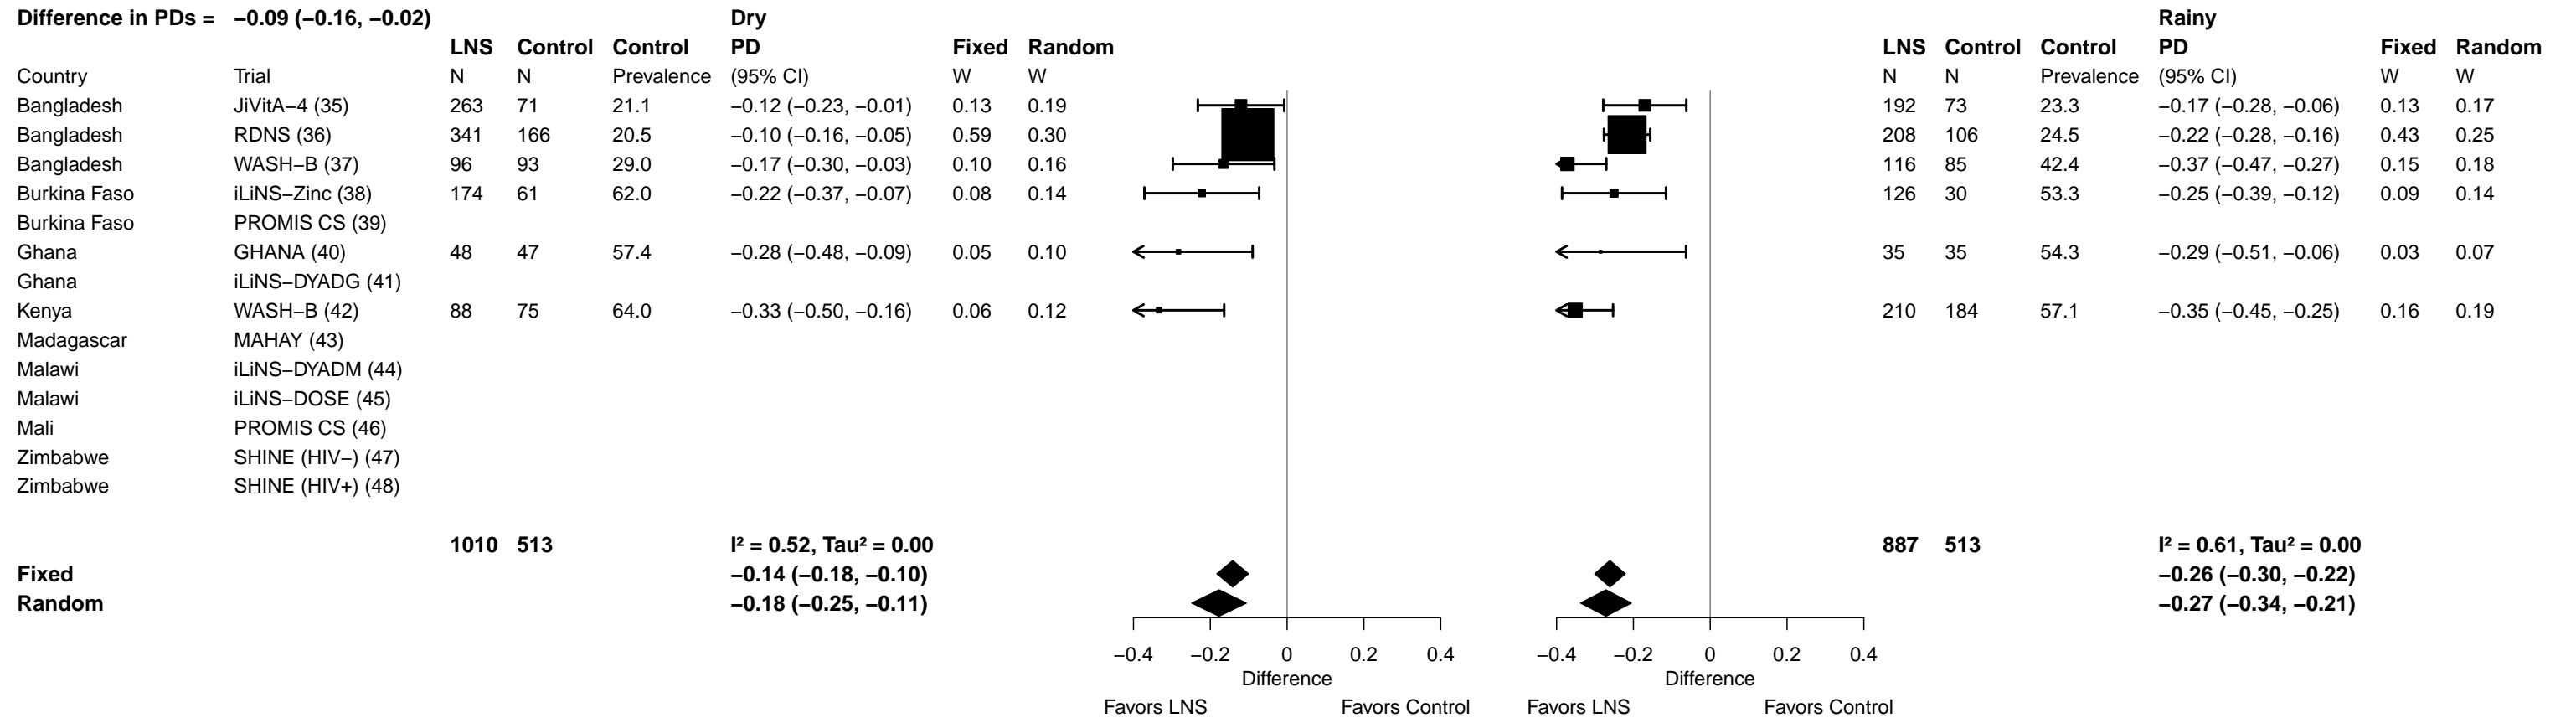

### Supplemental figure 7I: Iron deficiency anemia prevalence ratio

#### 7I1: Stratified by Household socio-economic status

**P-for-interaction = 0.751**

**Ratio of PRs = 1.06 (0.74, 1.52)**

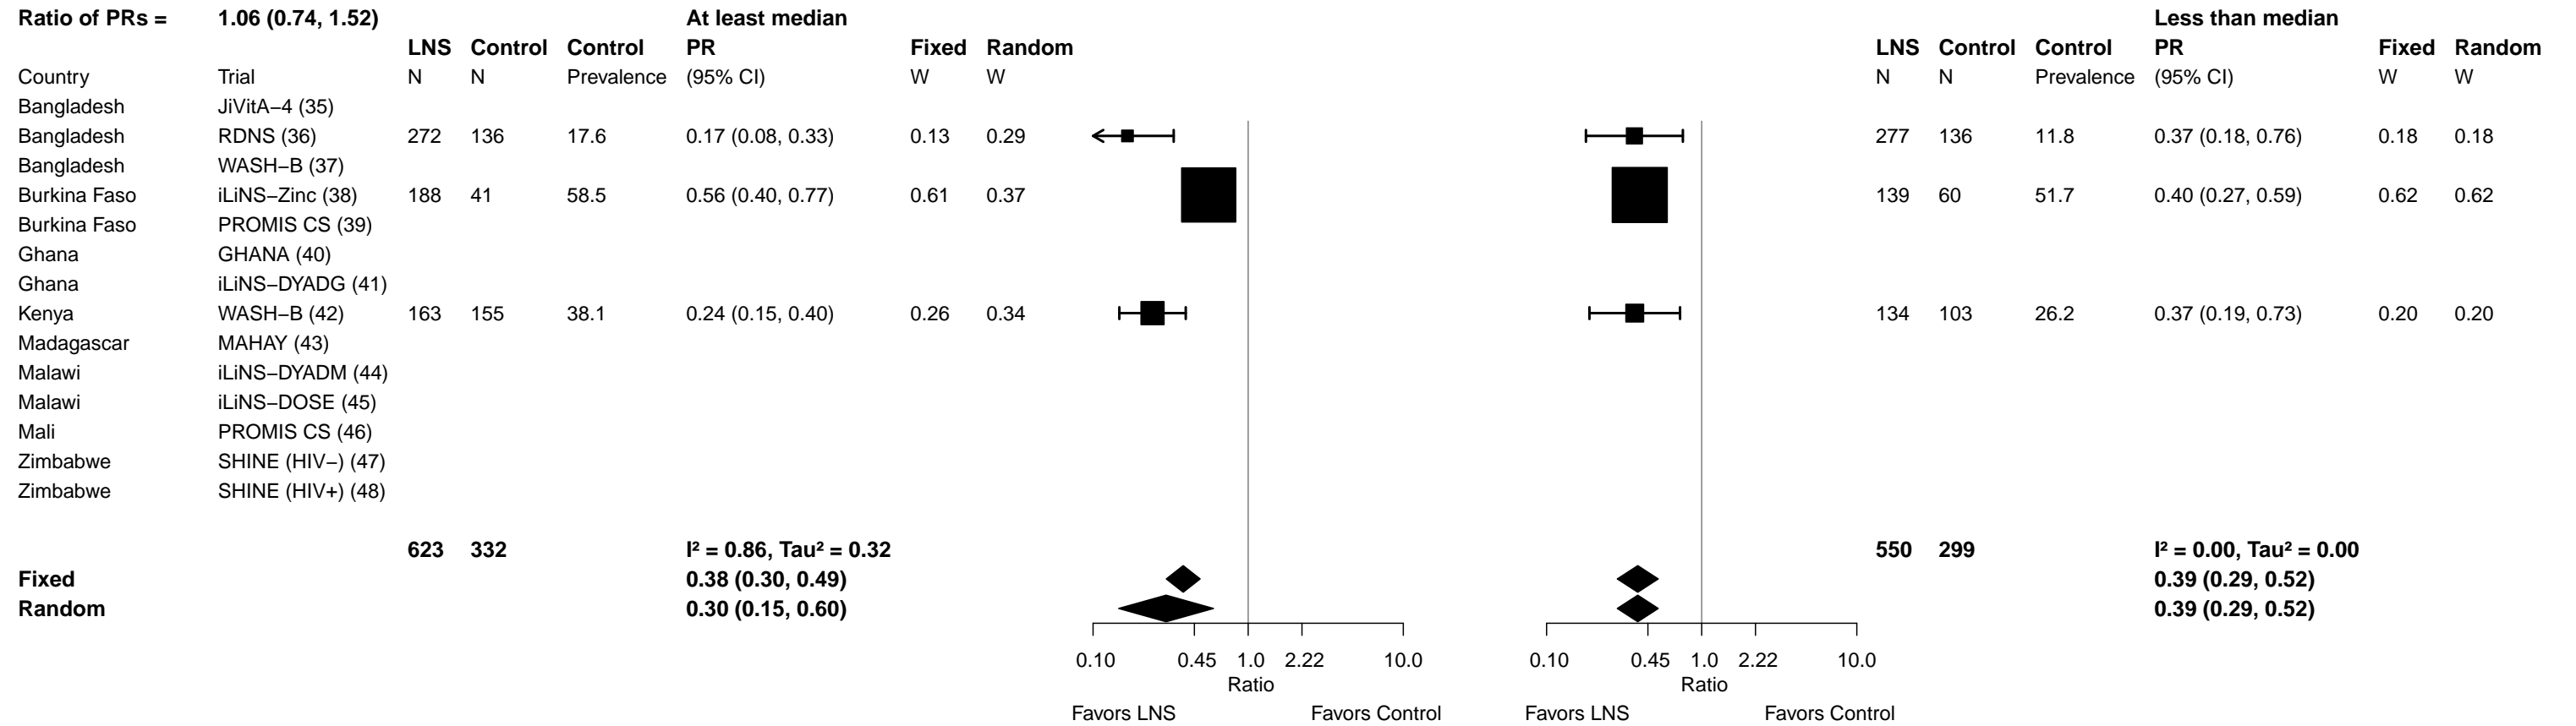

**Supplemental figure 7I: Iron deficiency anemia prevalence ratio**

**7I2: Stratified by Household food insecurity (insufficient comparisons)**

**Supplemental figure 7I: Iron deficiency anemia prevalence ratio**

**7I3: Stratified by Household source water quality (insufficient comparisons)**

**Supplemental figure 7I: Iron deficiency anemia prevalence ratio**

**7I4: Stratified by Household sanitation (insufficient comparisons)**



**Supplemental figure 7I: Iron deficiency anemia prevalence ratio**

**7I5: Stratified by Season at the time of assessment (insufficient comparisons)**



**Supplemental figure 7J: Iron deficiency anemia prevalence difference**

**7J2: Stratified by Household food insecurity (insufficient comparisons)**

**Supplemental figure 7J: Iron deficiency anemia prevalence difference**

**7J3: Stratified by Household source water quality (insufficient comparisons)**

**Supplemental figure 7J: Iron deficiency anemia prevalence difference**

**7J4: Stratified by Household sanitation (insufficient comparisons)**

**Supplemental figure 7J: Iron deficiency anemia prevalence difference**

**7J5: Stratified by Season at the time of assessment (insufficient comparisons)**

### Supplemental figure 7K: Geometric mean ratio of soluble transferrin receptor concentration

#### 7K1: Stratified by Household socio-economic status

**P-for-interaction = 0.373**  
**Ratio of GMRs = 1.03 (0.97, 1.09)**

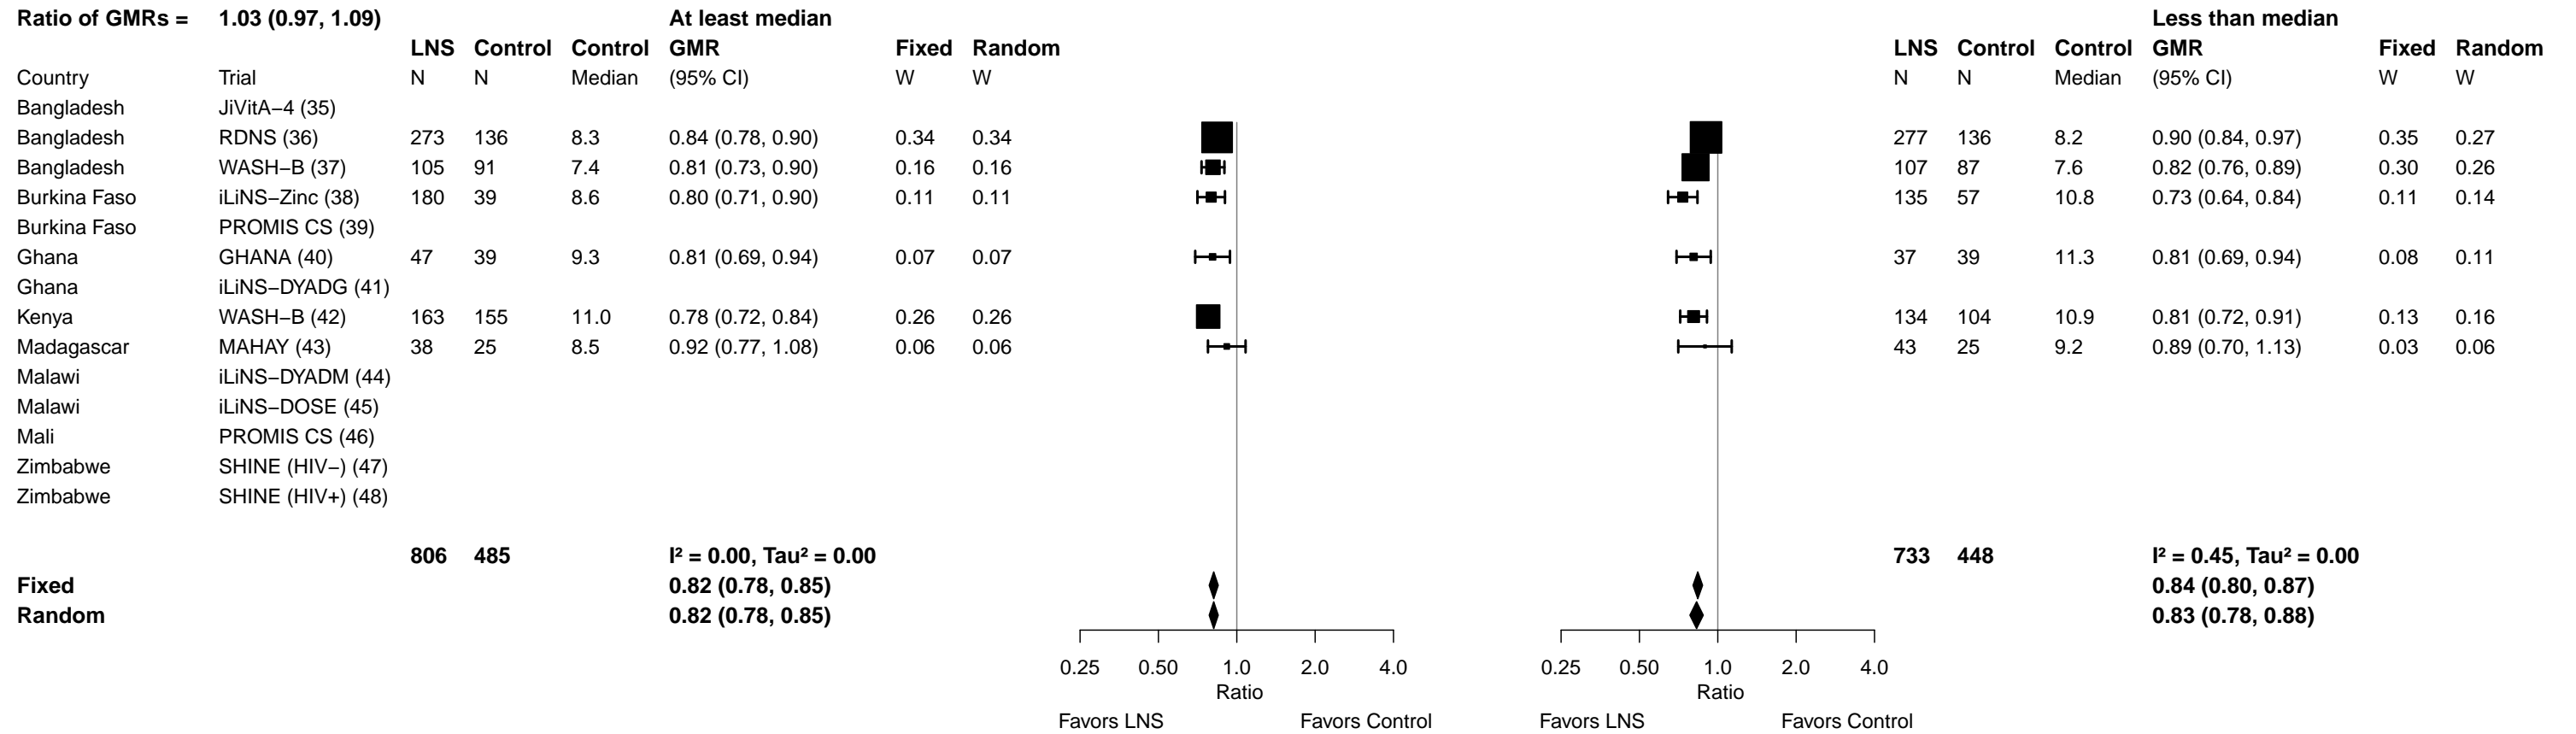

Supplemental figure 7K: Geometric mean ratio of soluble transferrin receptor concentration

7K2: Stratified by Household food insecurity

**P-for-interaction = 0.189**  
**Ratio of GMRs = 1.05 (0.98, 1.12)**

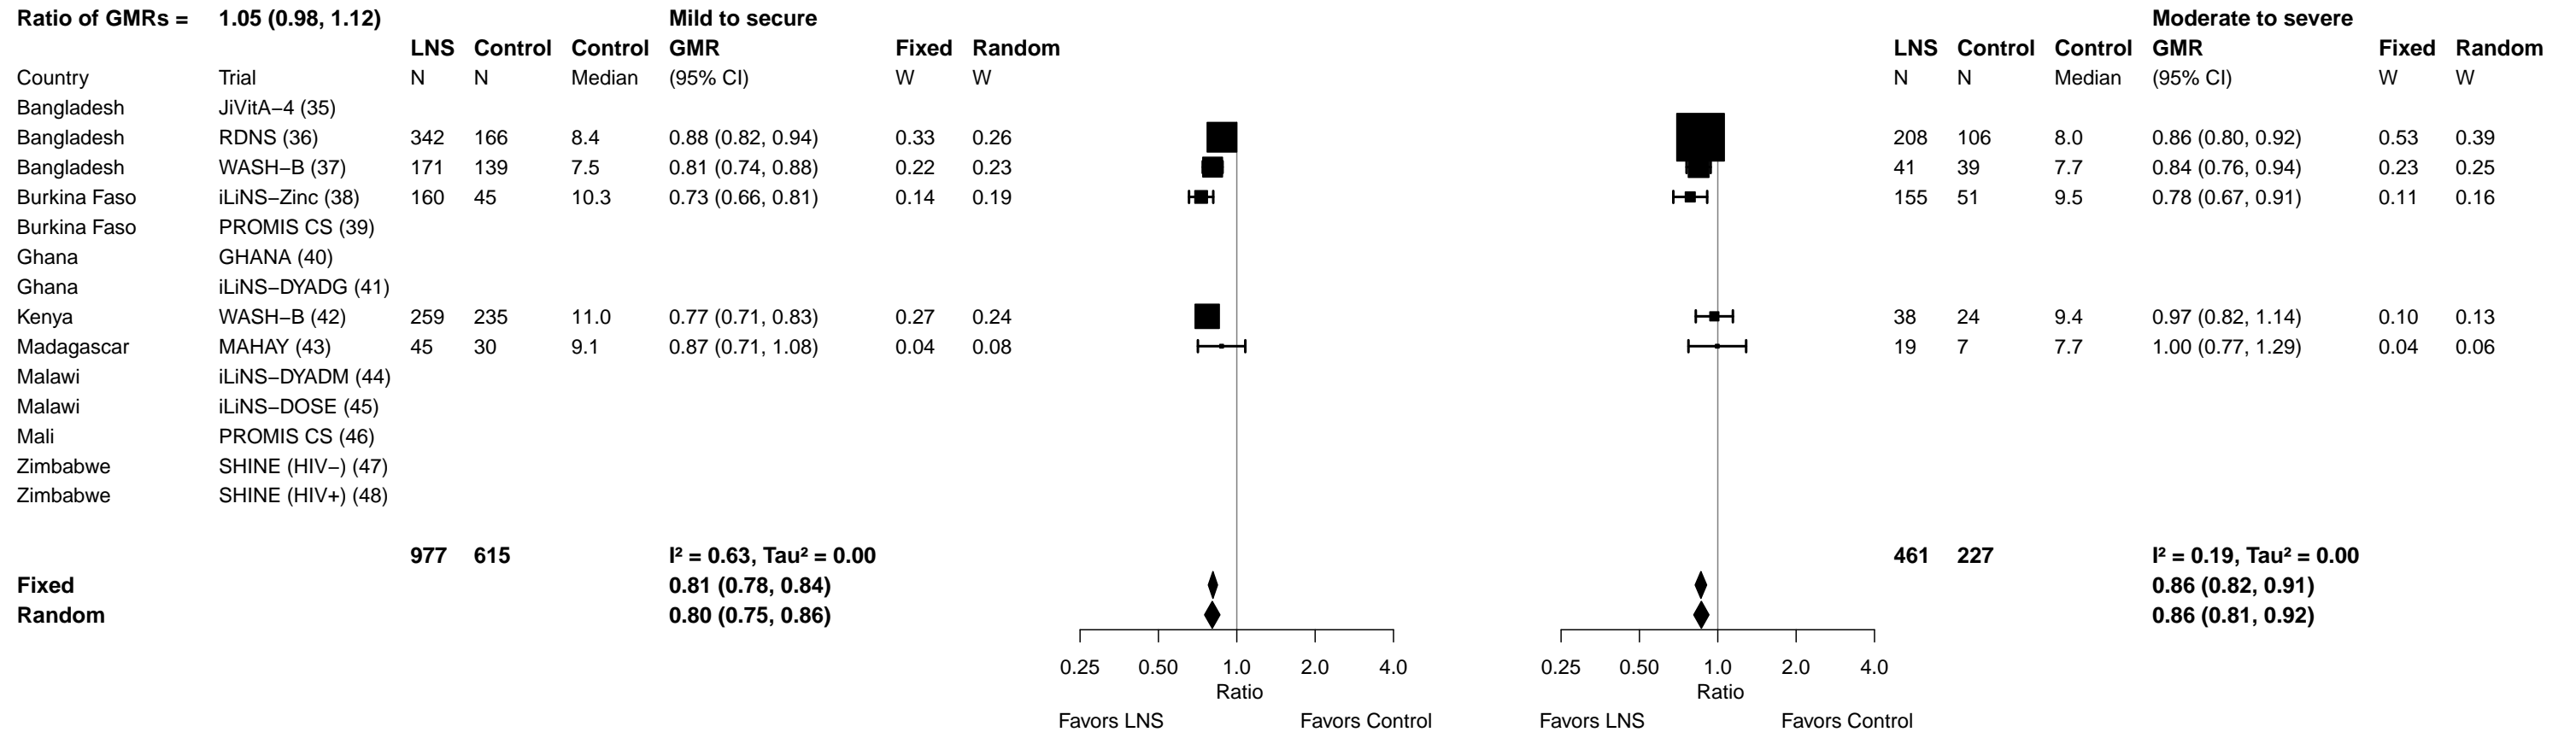



Supplemental figure 7K: Geometric mean ratio of soluble transferrin receptor concentration

7K3: Stratified by Household source water quality

**P-for-interaction = 0.039**  
**Ratio of GMRs = 1.11 (1.01, 1.22)**

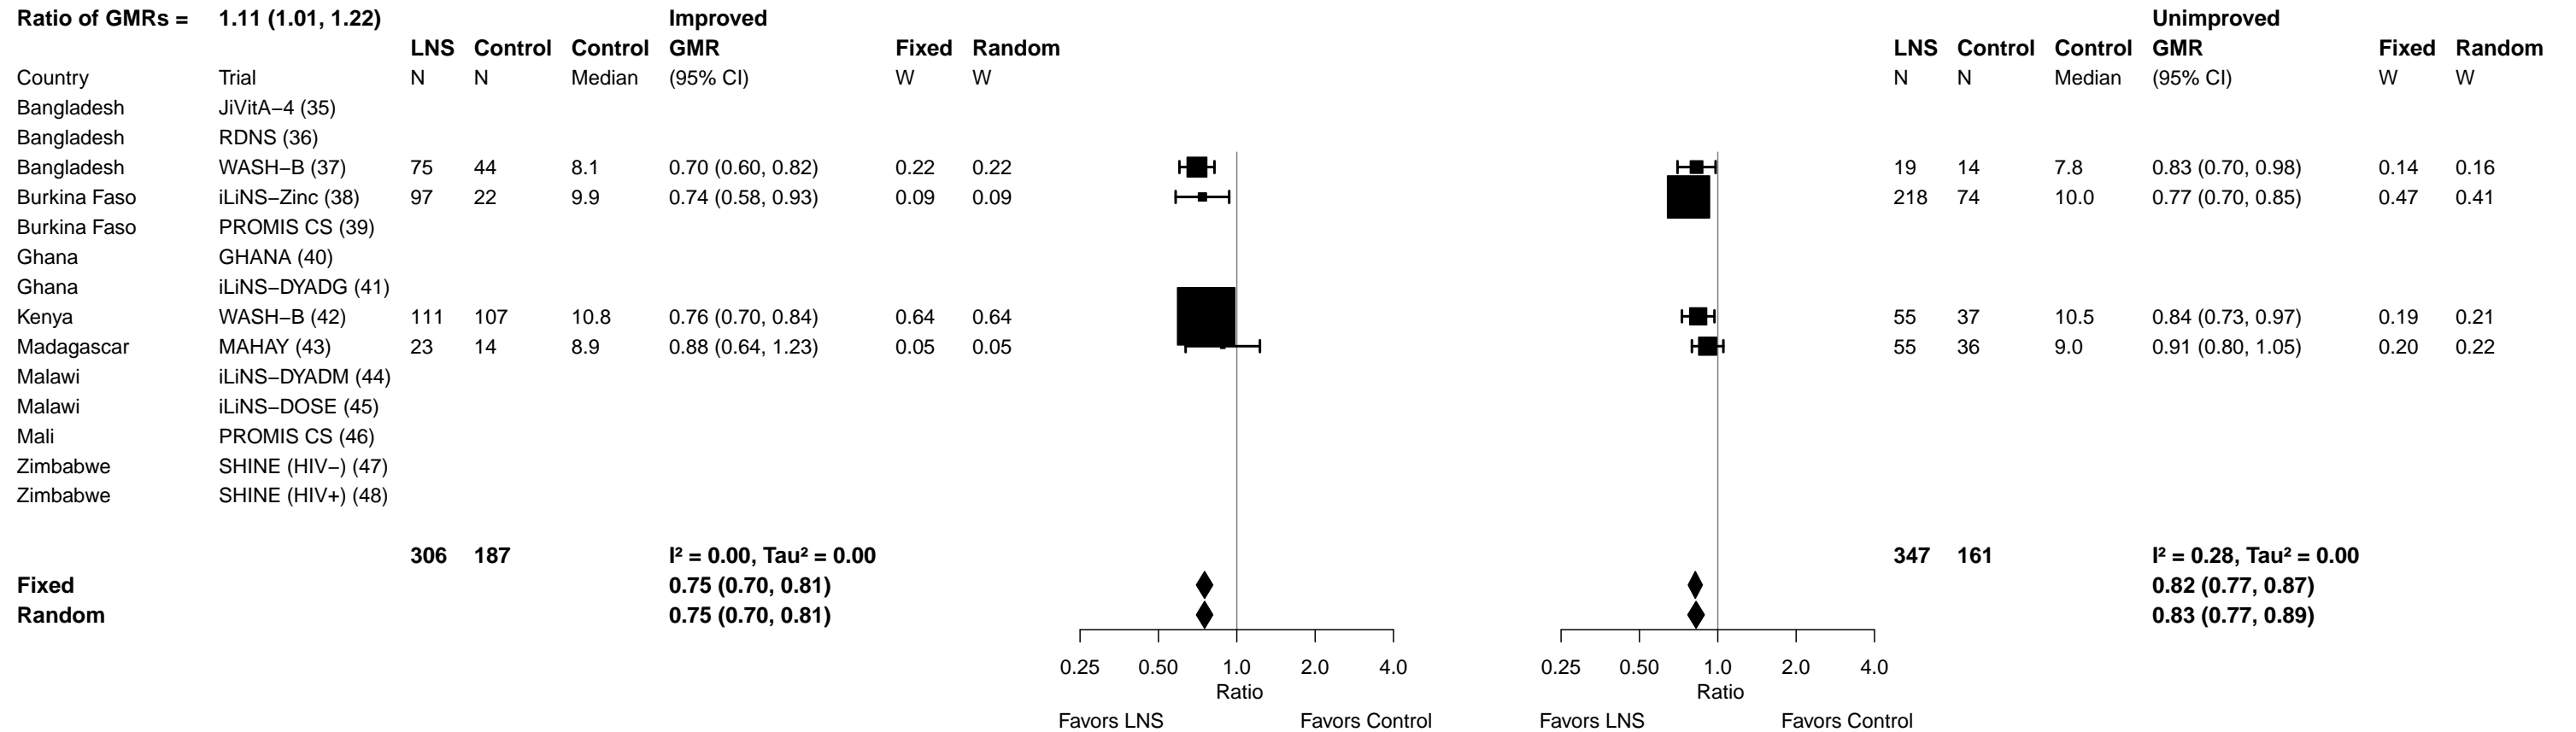

**Supplemental figure 7K: Geometric mean ratio of soluble transferrin receptor concentration**

**7K4: Stratified by Household sanitation (insufficient comparisons)**

Supplemental figure 7K: Geometric mean ratio of soluble transferrin receptor concentration

7K5: Stratified by Season at the time of assessment

**P-for-interaction = 0.865**  
**Ratio of GMRs = 1.01 (0.95, 1.07)**

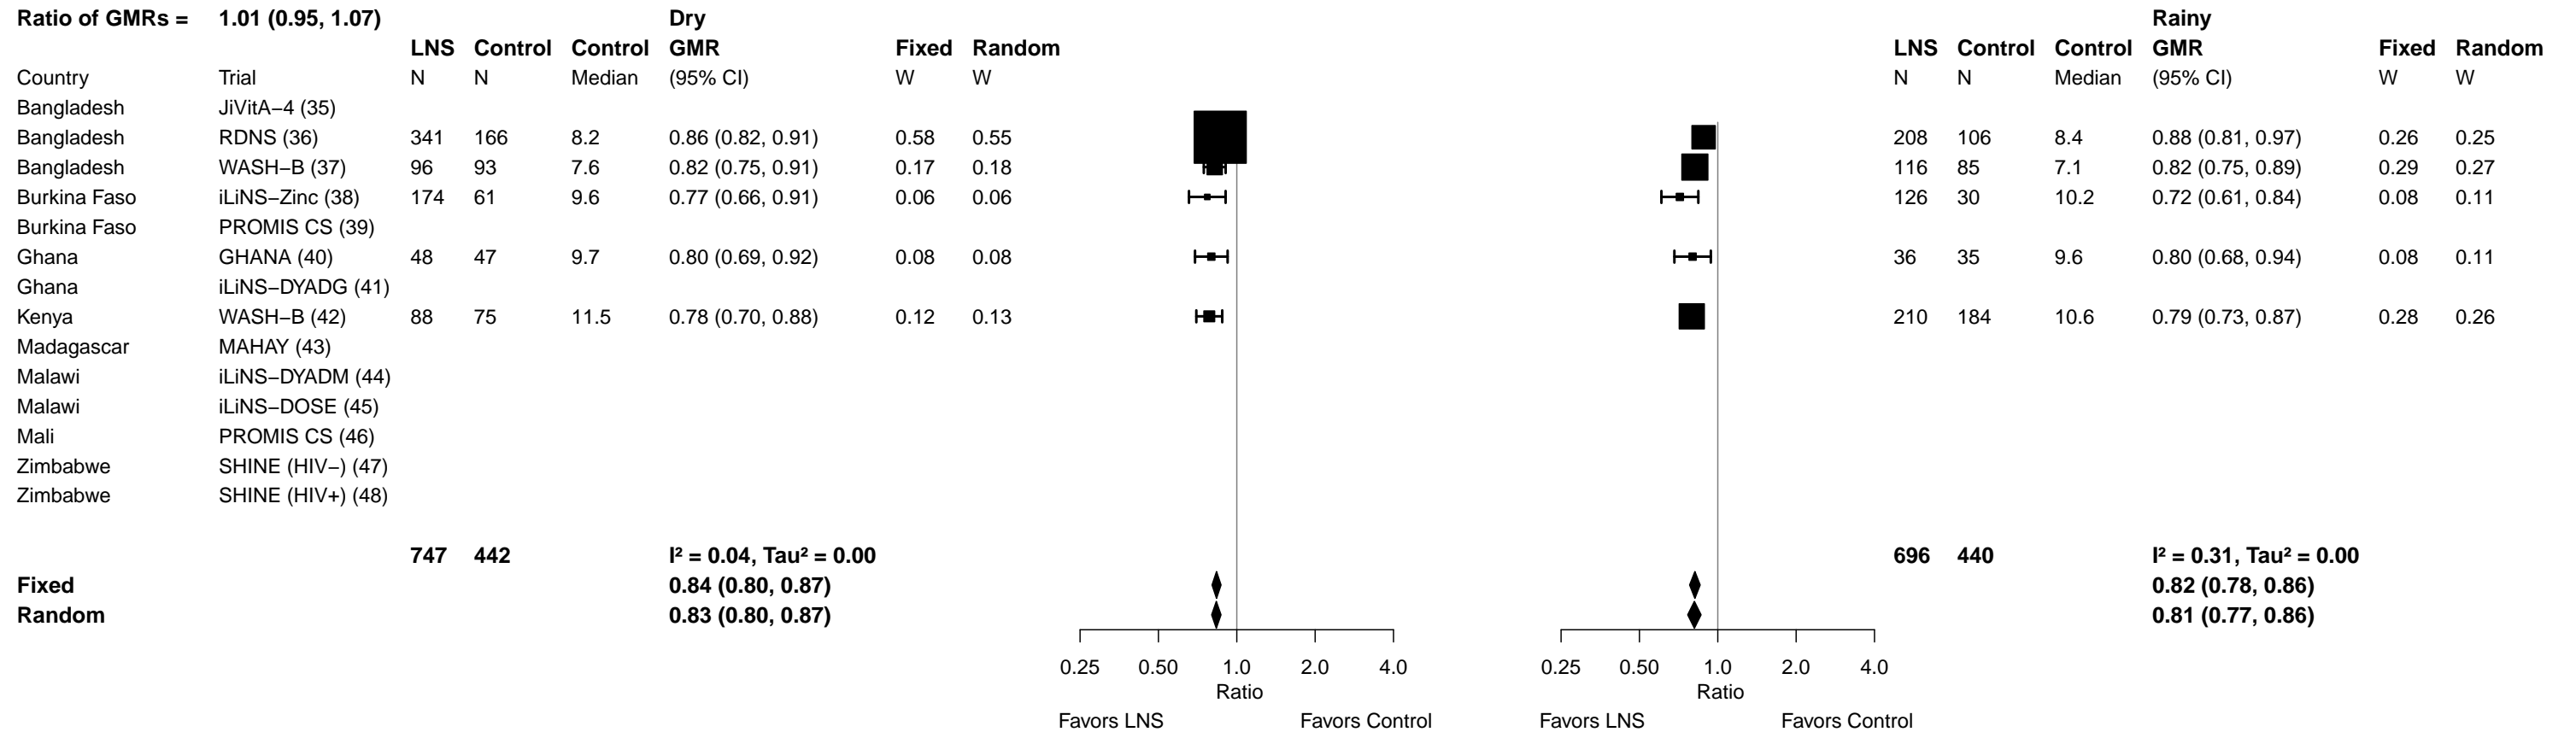

### Supplemental figure 7L: Elevated soluble transferrin receptor prevalence ratio

#### 7L1: Stratified by Household socio-economic status

**P-for-interaction = 0.066**

**Ratio of PRs = 1.18 (0.99, 1.41)**

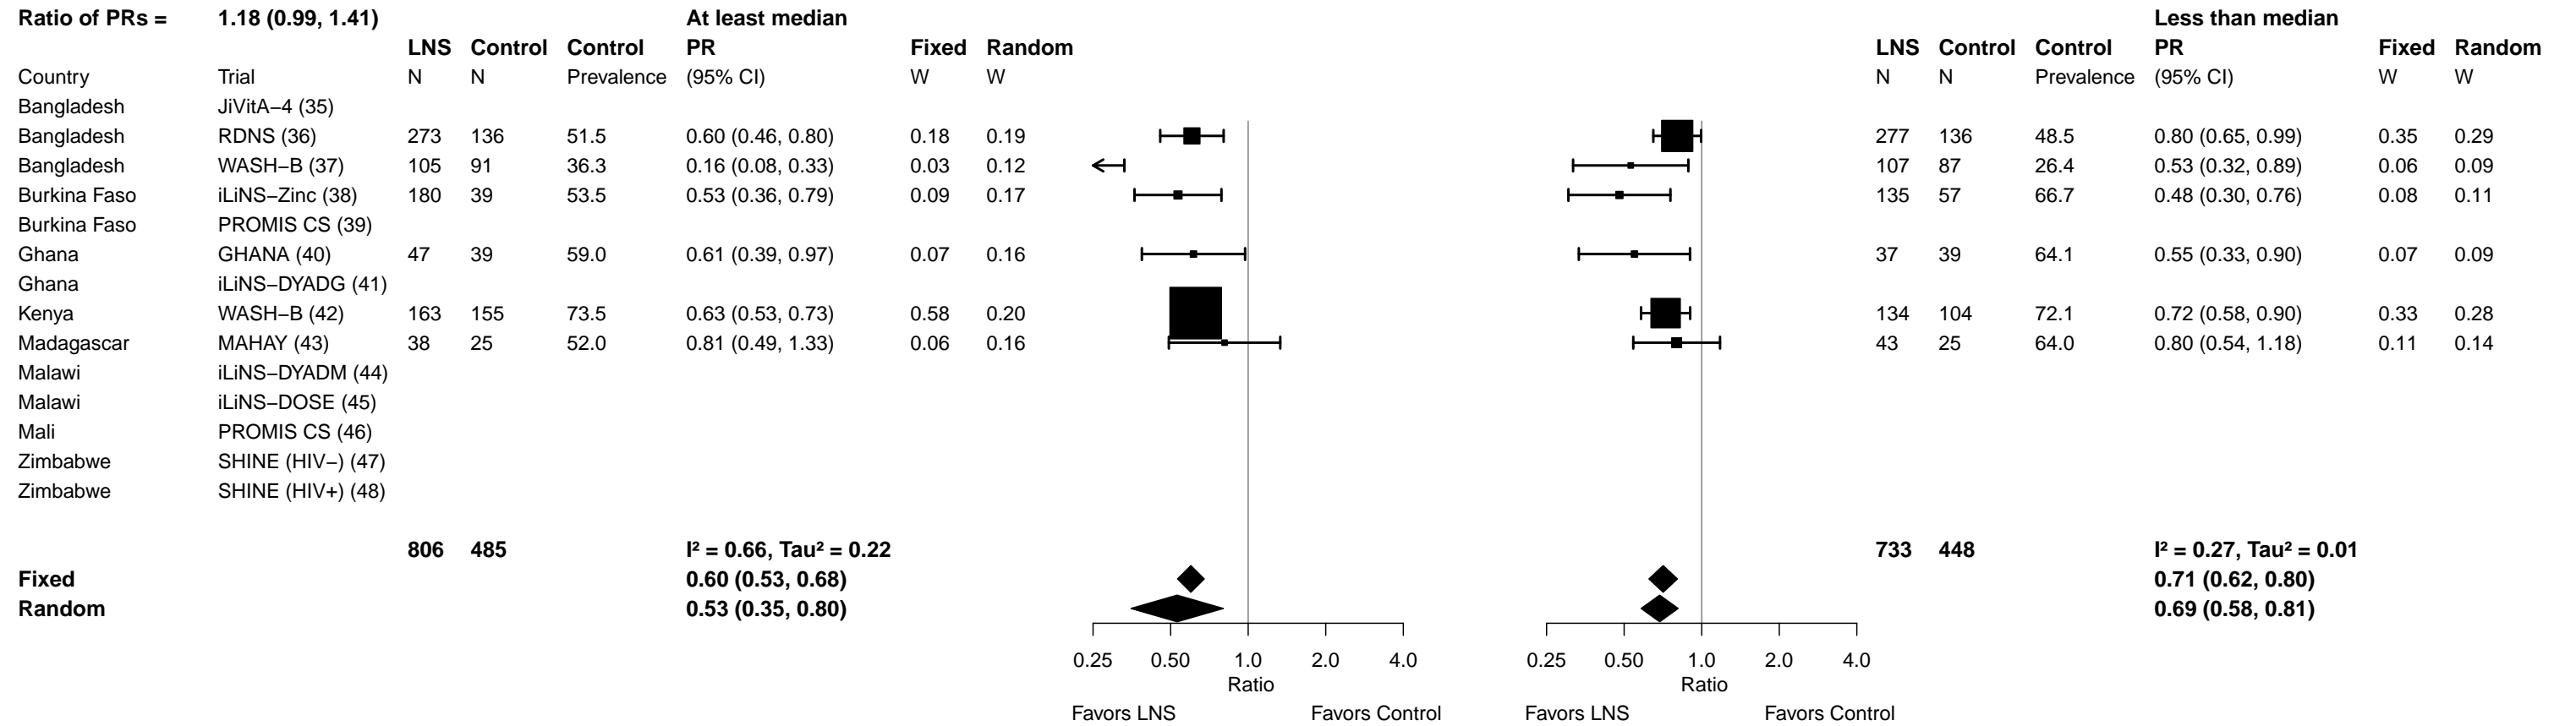

Supplemental figure 7L: Elevated soluble transferrin receptor prevalence ratio

7L2: Stratified by Household food insecurity

P-for-interaction = 0.366

Ratio of PRs = 1.10 (0.89, 1.36)

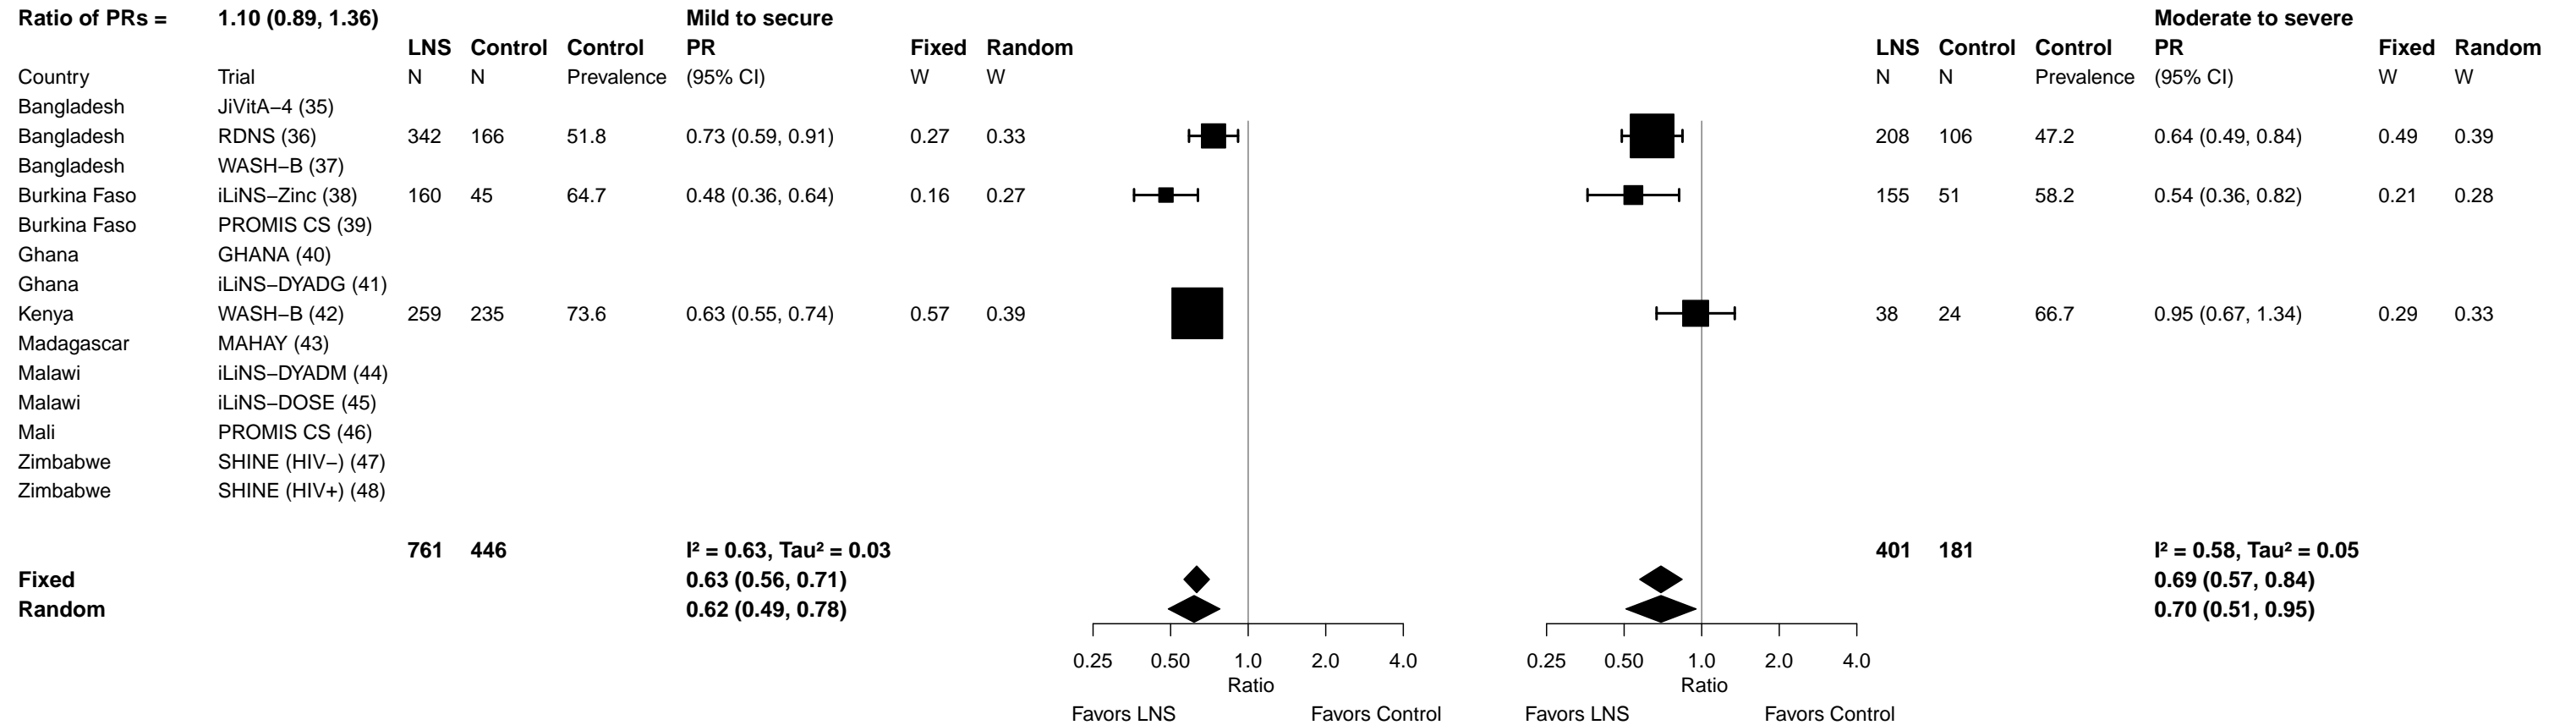

Supplemental figure 7L: Elevated soluble transferrin receptor prevalence ratio

7L3: Stratified by Household source water quality

P-for-interaction = 0.114

Ratio of PRs = 1.24 (0.95, 1.62)

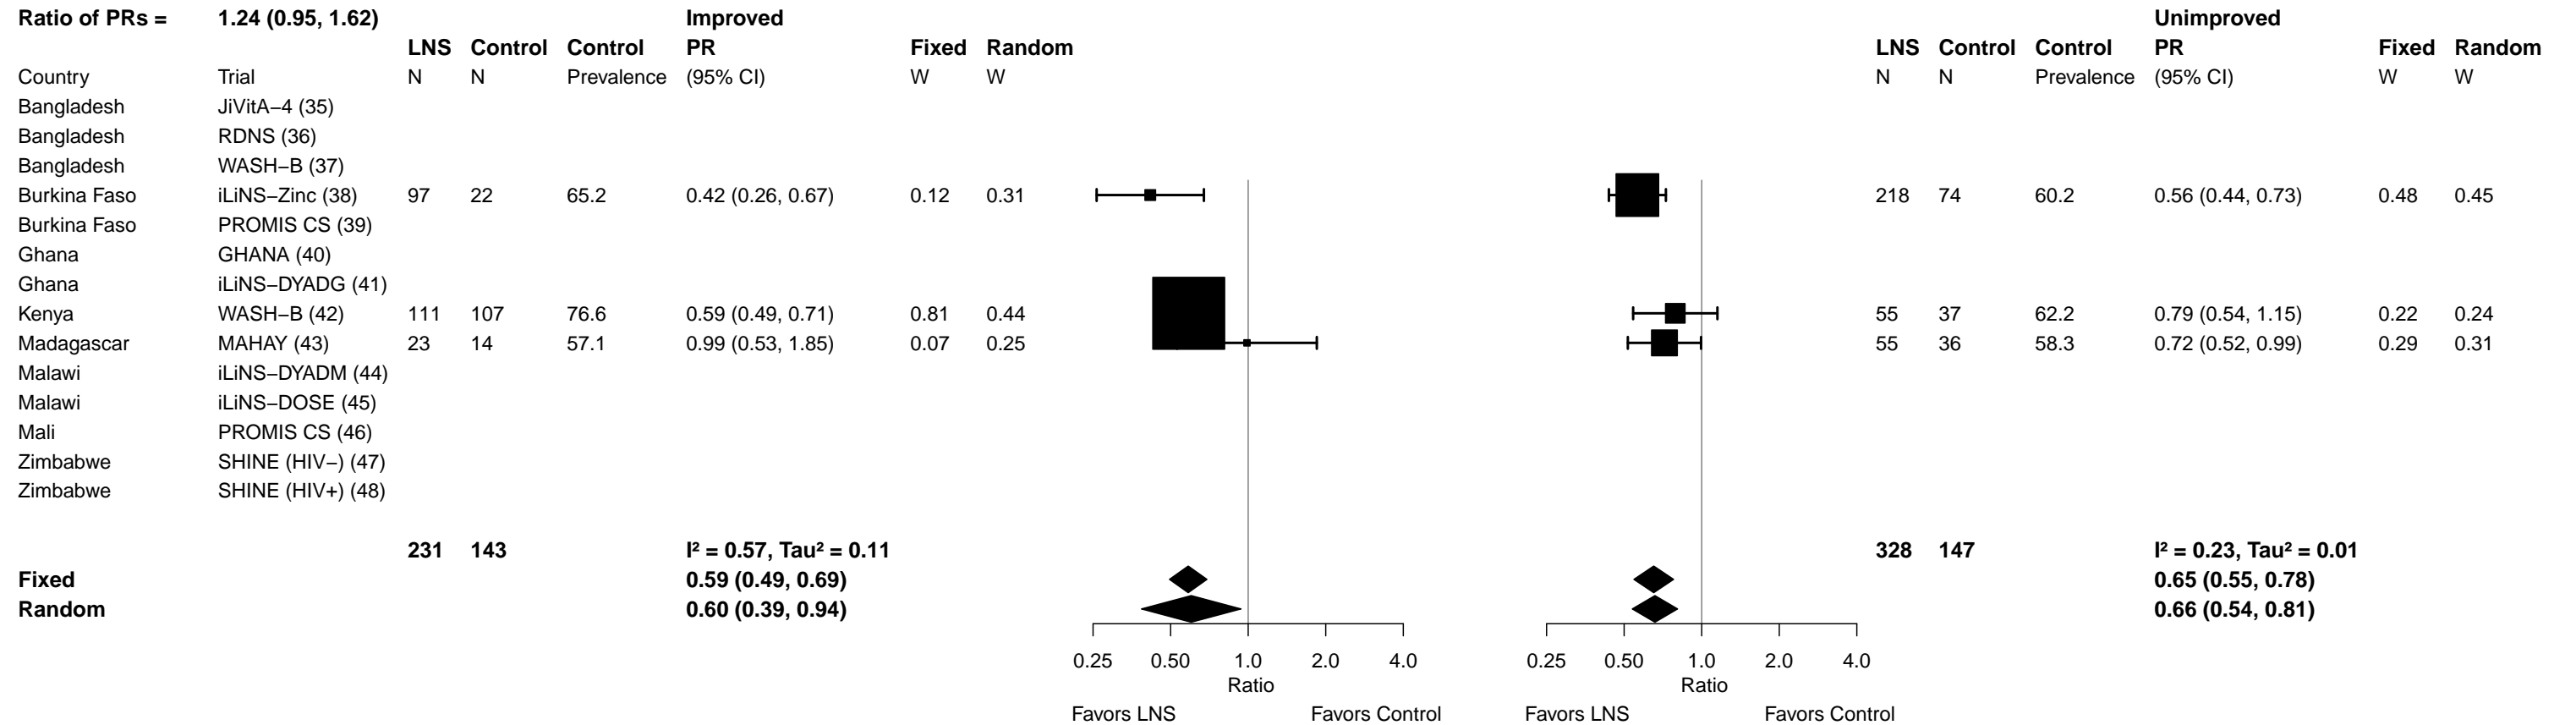

**Supplemental figure 7L: Elevated soluble transferrin receptor prevalence ratio**

**7L4: Stratified by Household sanitation (insufficient comparisons)**

Supplemental figure 7L: Elevated soluble transferrin receptor prevalence ratio

7L5: Stratified by Season at the time of assessment

P-for-interaction = 0.154

Ratio of PRs = 1.14 (0.95, 1.35)

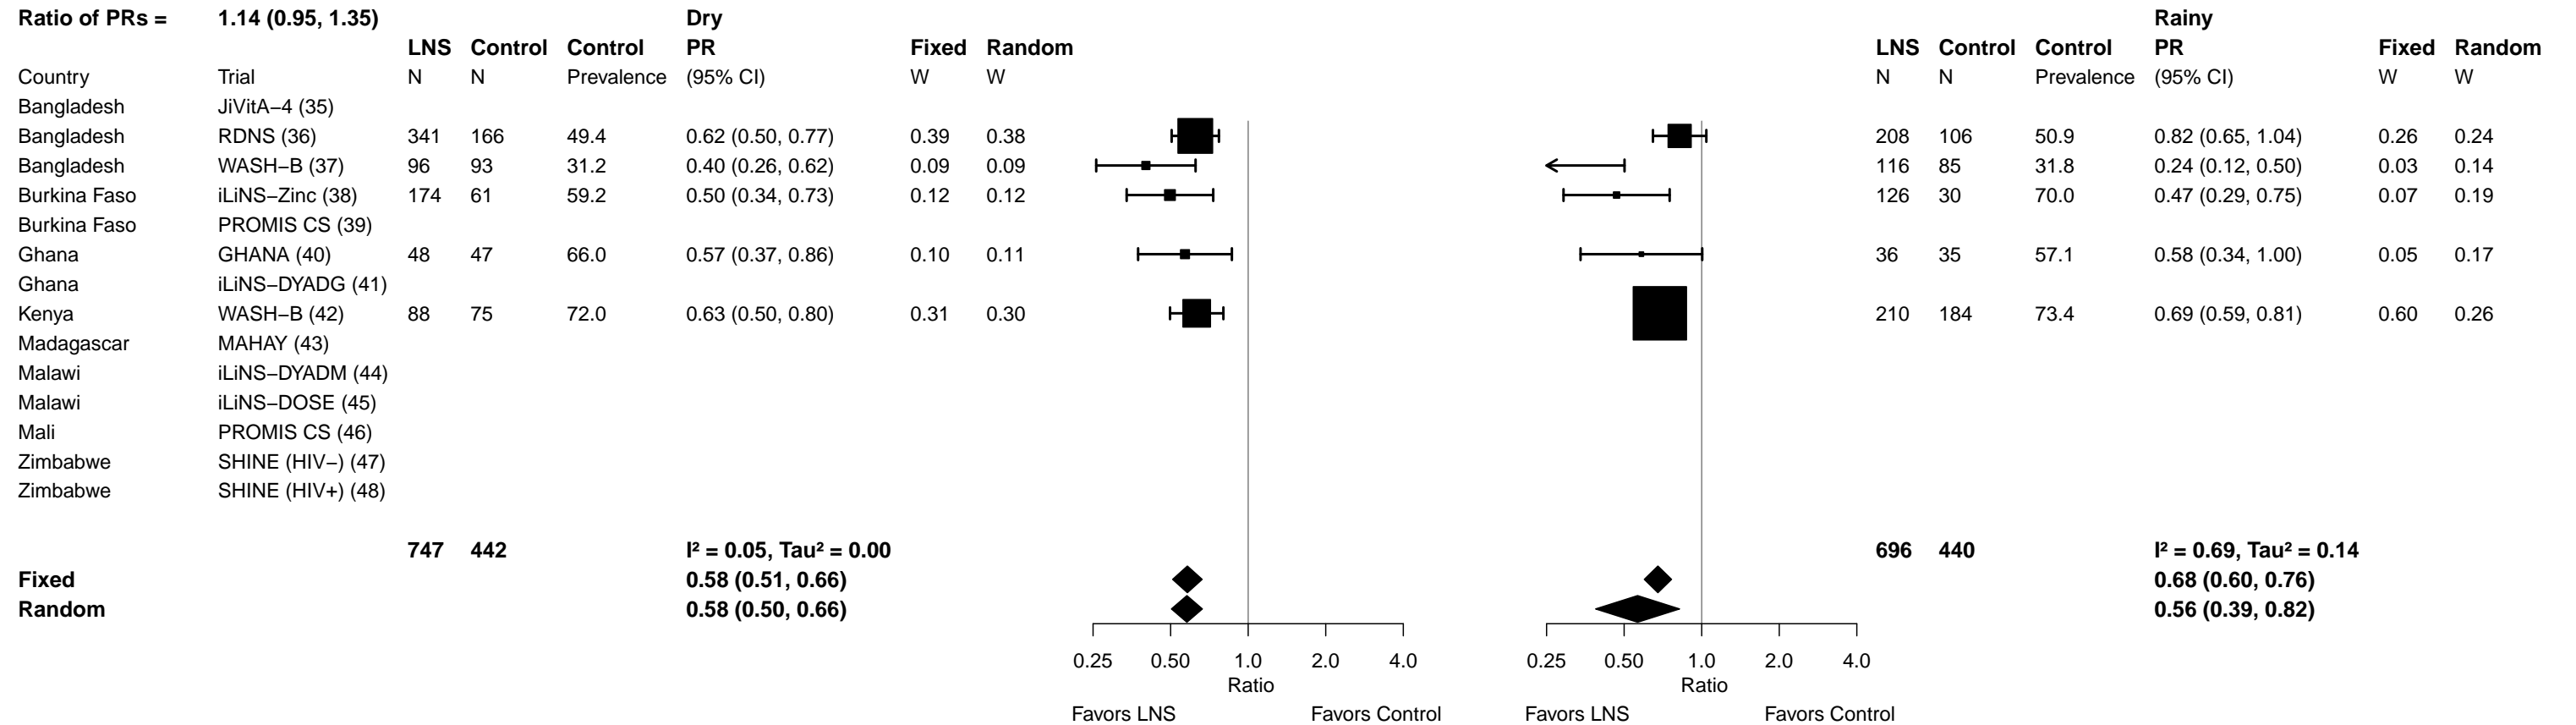



### Supplemental figure 7M: Elevated soluble transferrin receptor prevalence difference

#### 7M1: Stratified by Household socio-economic status

**P-for-interaction = 0.058**  
**Difference in PDs = 0.07 (0.00, 0.15)**

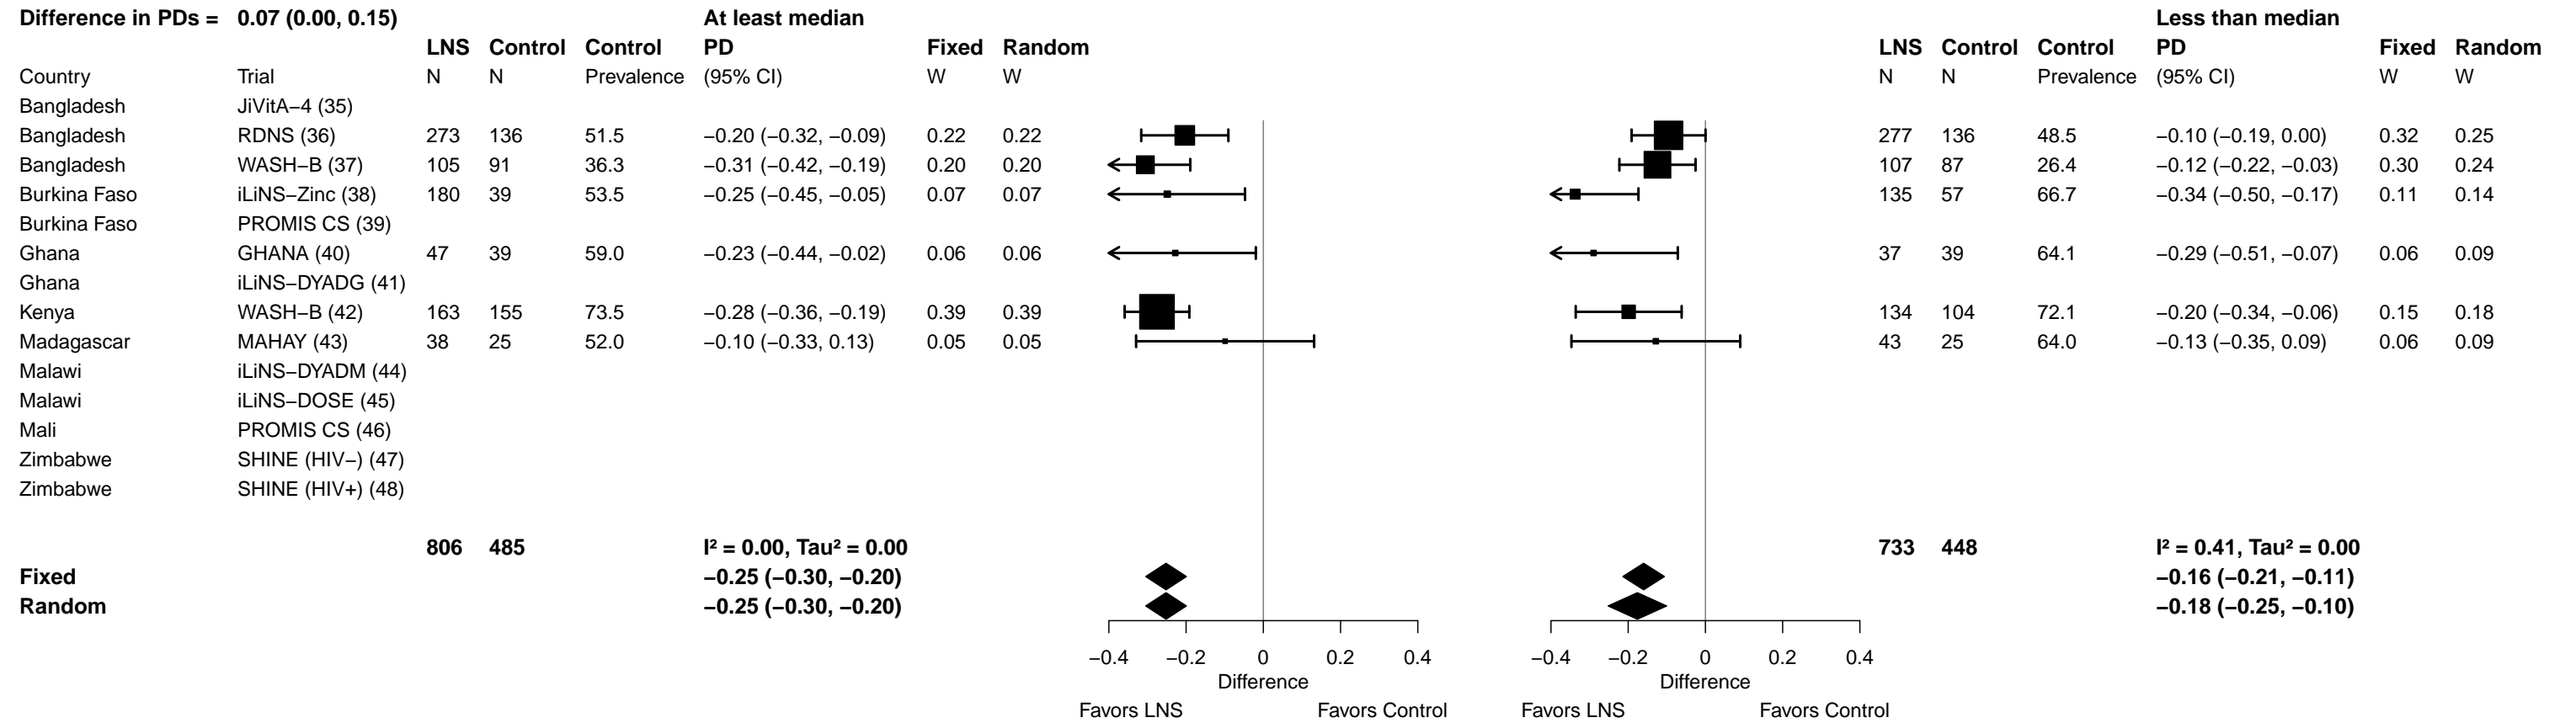

Supplemental figure 7M: Elevated soluble transferrin receptor prevalence difference

7M2: Stratified by Household food insecurity

P-for-interaction = 0.433

Difference in PDs = 0.04 (-0.07, 0.15)

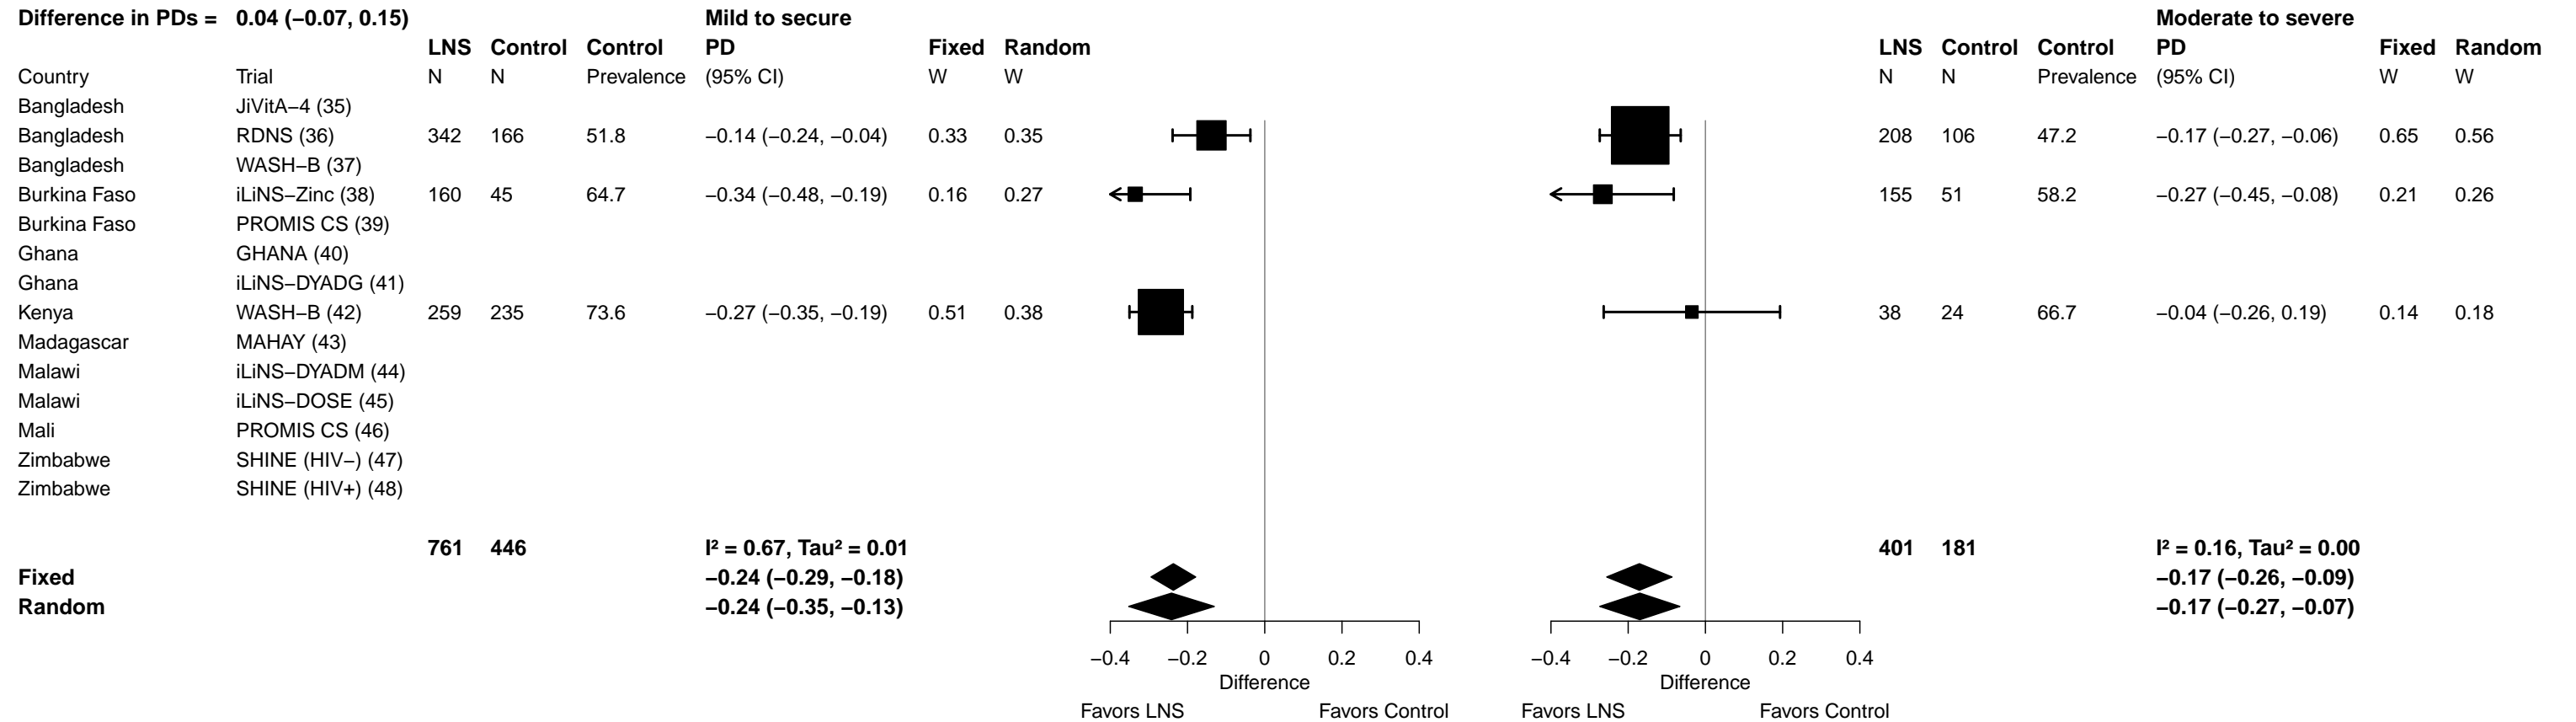

Supplemental figure 7M: Elevated soluble transferrin receptor prevalence difference

7M3: Stratified by Household source water quality

P-for-interaction = 0.231

Difference in PDs = 0.10 (-0.06, 0.25)

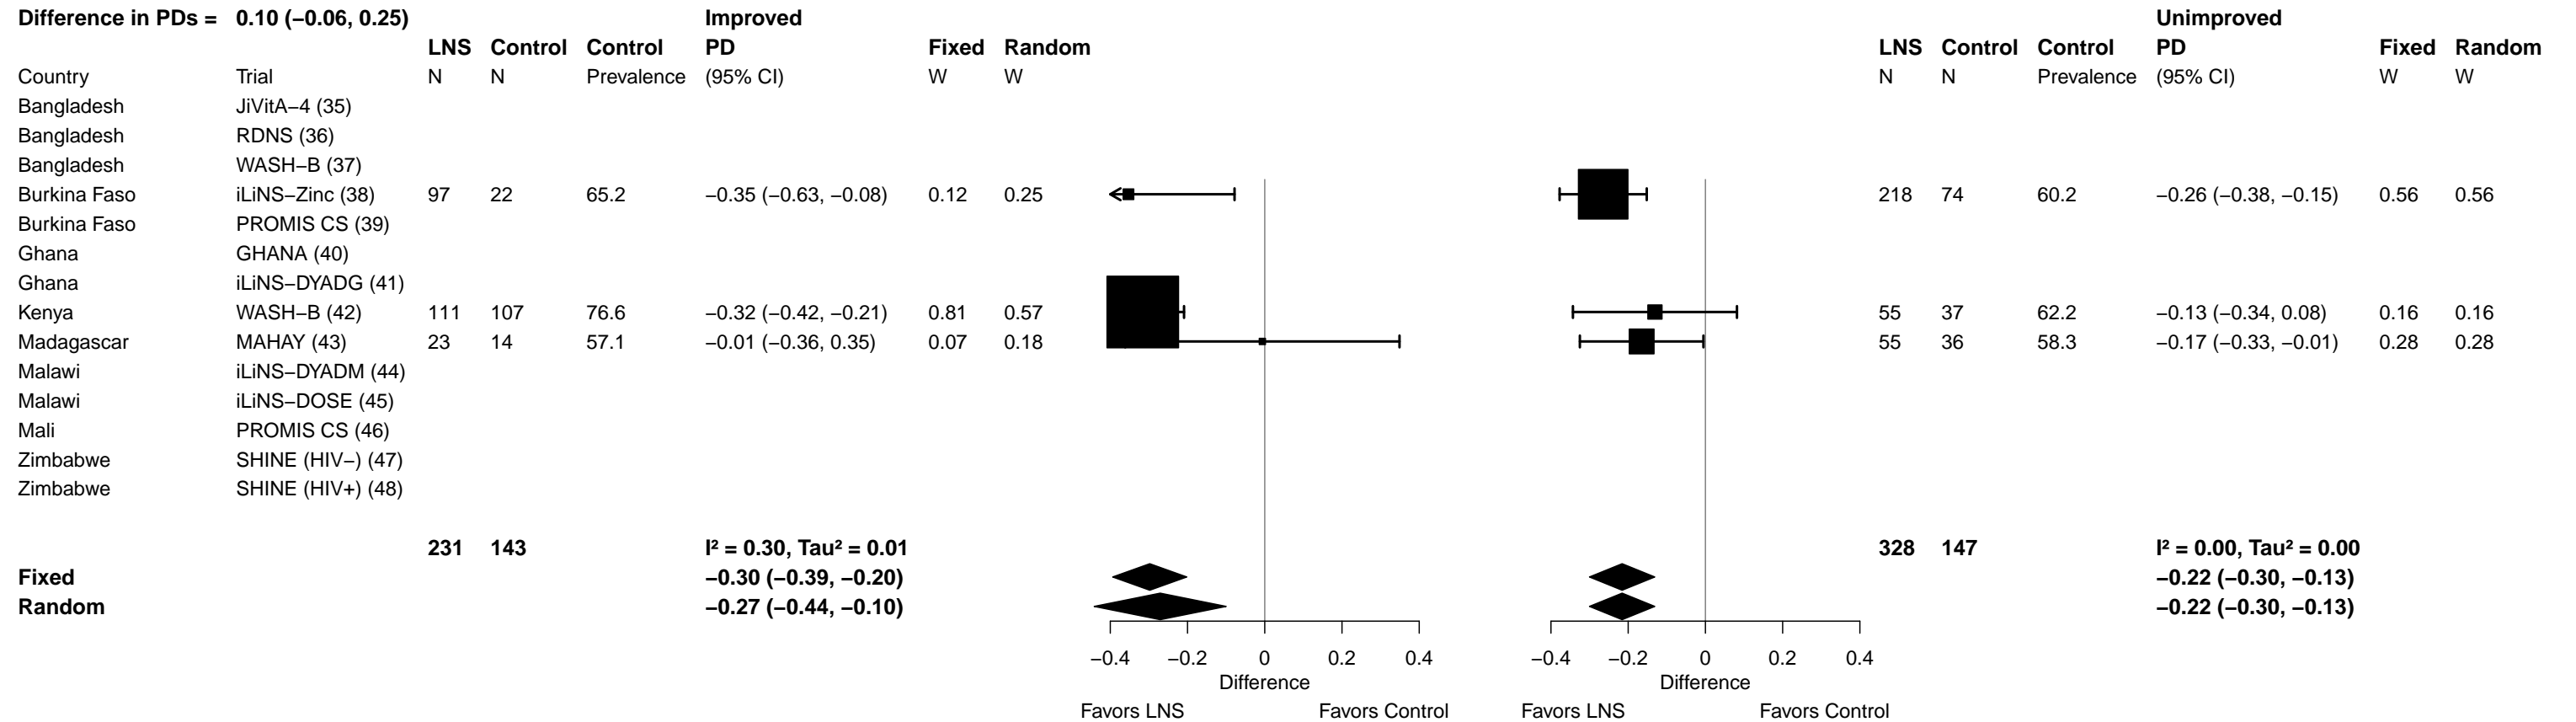

**Supplemental figure 7M: Elevated soluble transferrin receptor prevalence difference**

**7M4: Stratified by Household sanitation (insufficient comparisons)**

Supplemental figure 7M: Elevated soluble transferrin receptor prevalence difference

7M5: Stratified by Season at the time of assessment

P-for-interaction = 0.684

Difference in PDs = 0.02 (-0.06, 0.10)

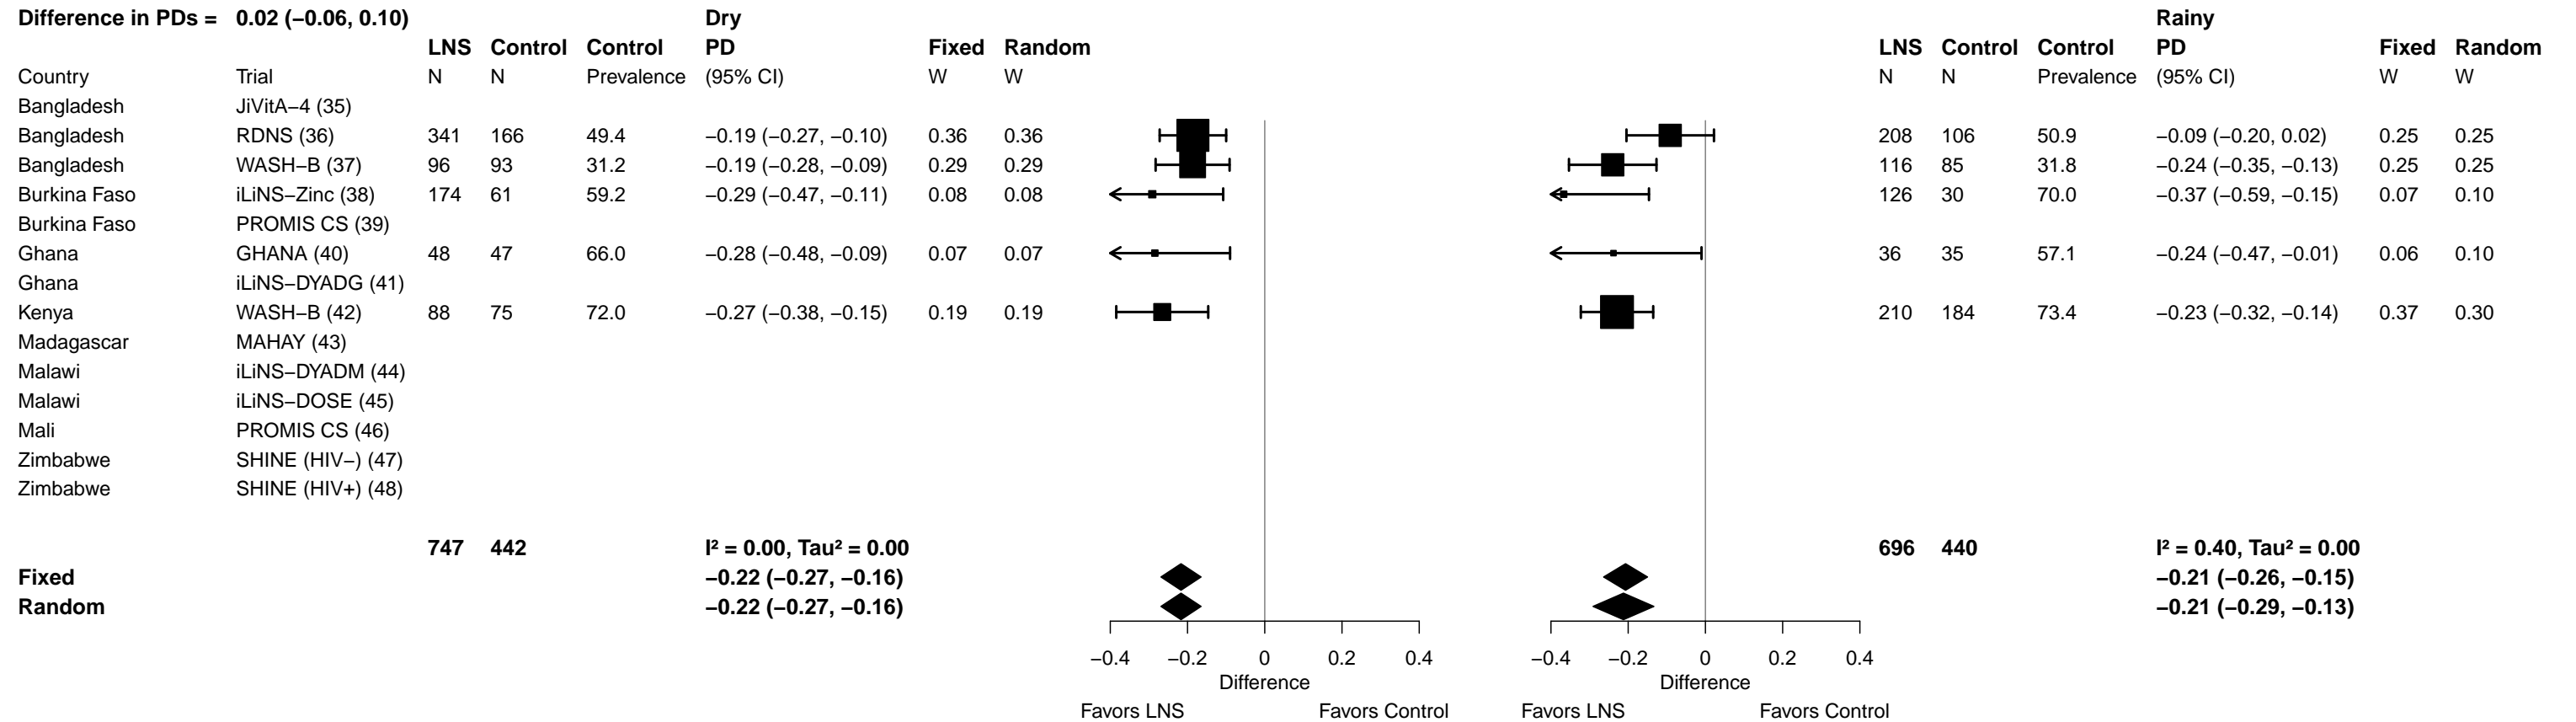

### Supplemental figure 7N: Geometric mean ratio of zinc protoporphyrin concentration

7N1: Stratified by Household socio-economic status

**P-for-interaction = 0.157**  
**Ratio of GMRs = 1.09 (0.97, 1.23)**

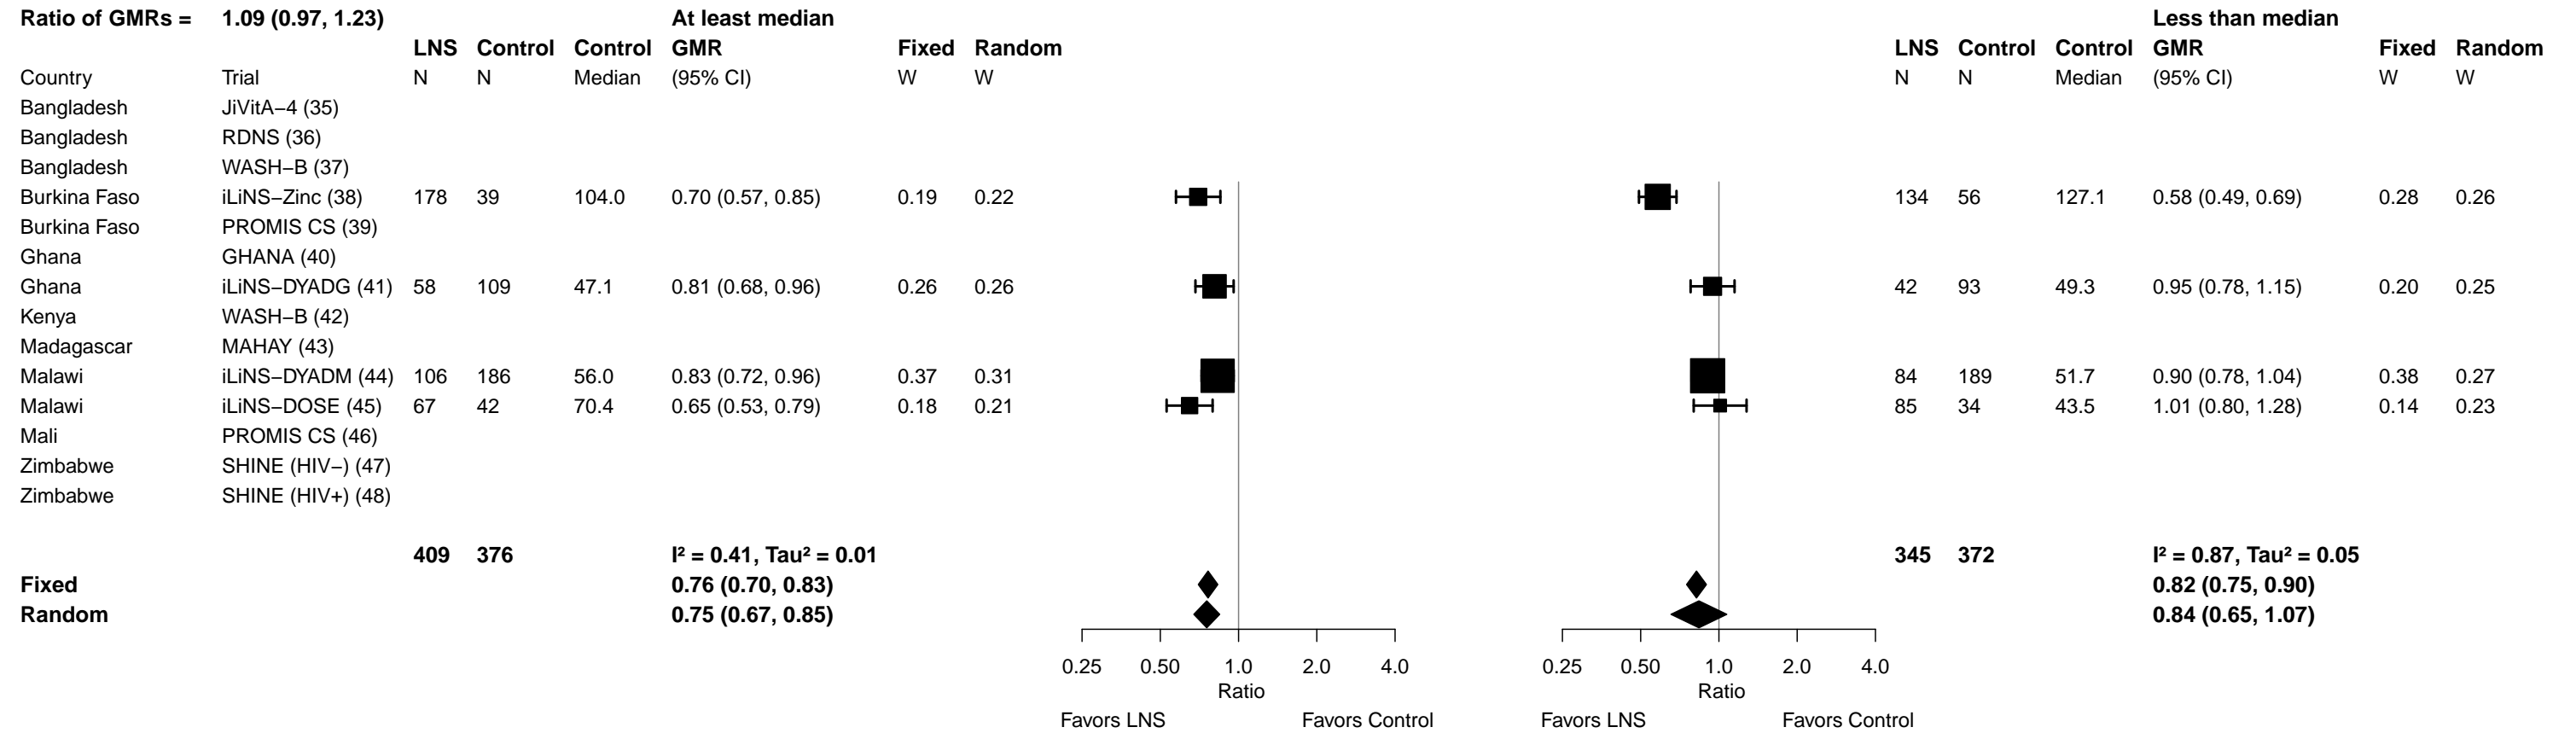

Supplemental figure 7N: Geometric mean ratio of zinc protoporphyrin concentration

7N2: Stratified by Household food insecurity

**P-for-interaction = 0.193**  
**Ratio of GMRs = 1.09 (0.96, 1.24)**

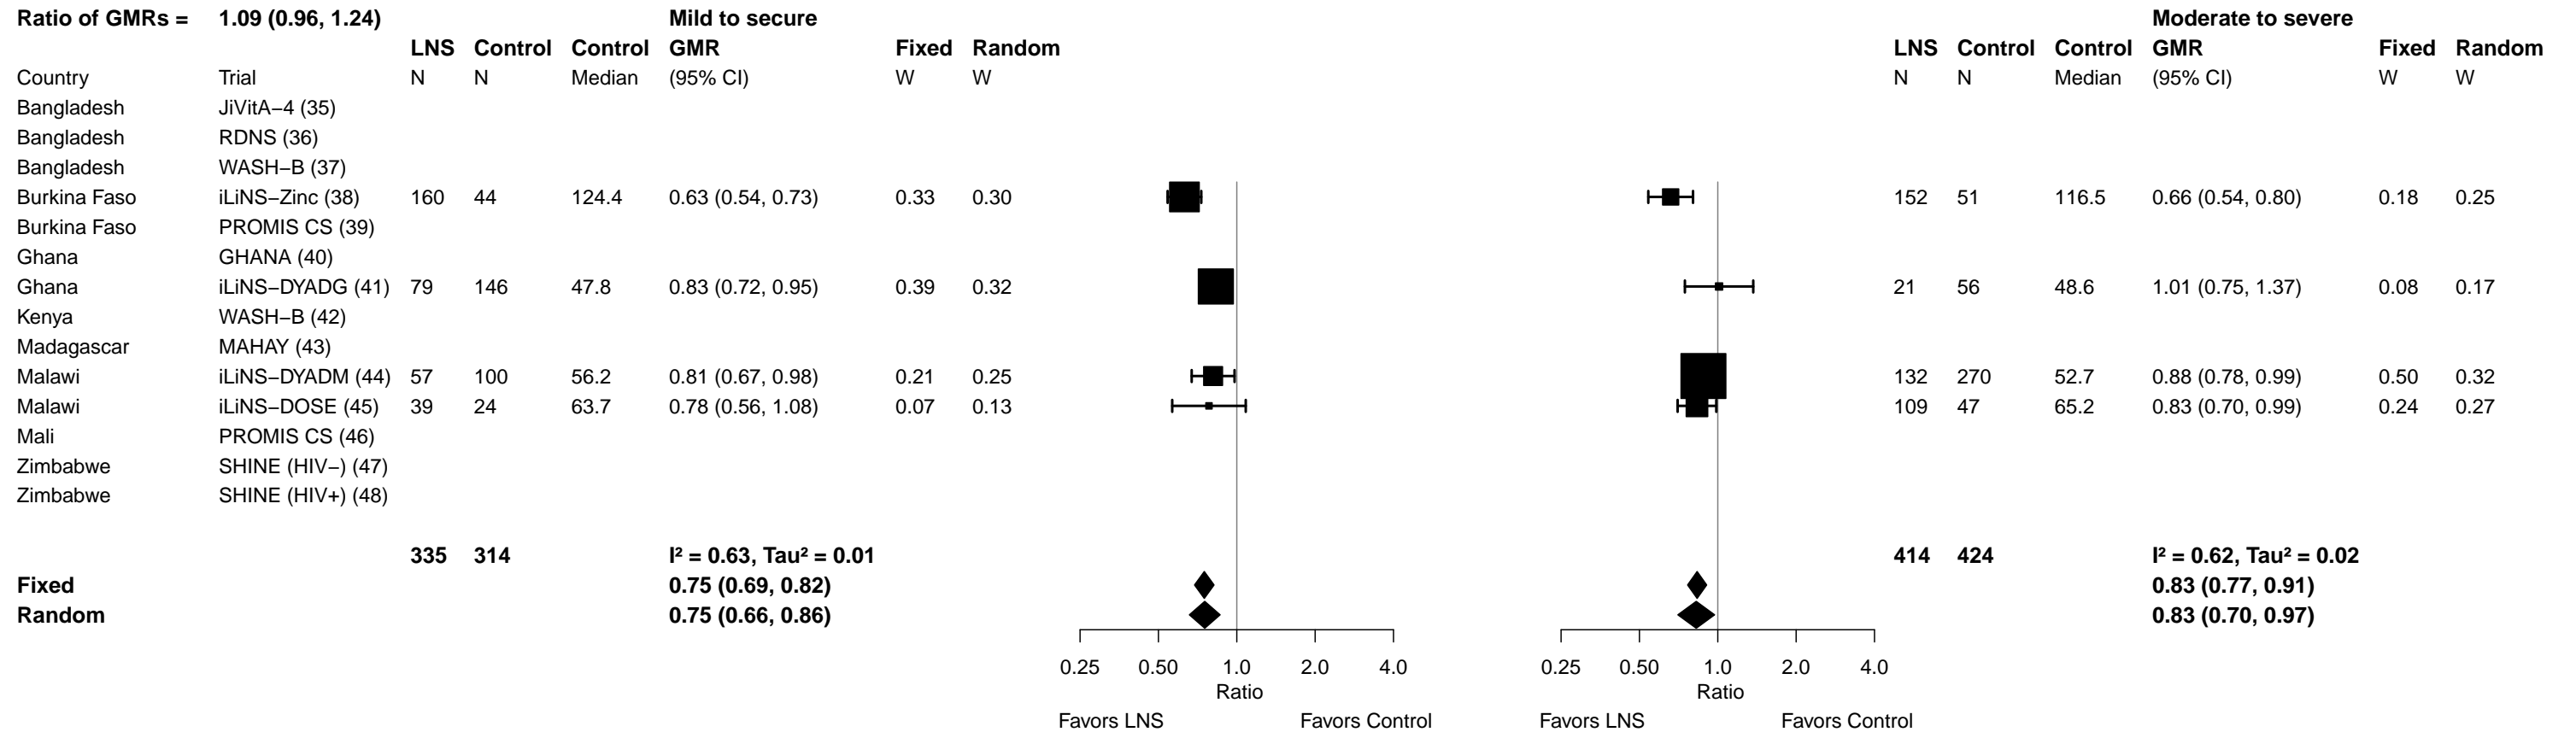

**Supplemental figure 7N: Geometric mean ratio of zinc protoporphyrin concentration**

**7N3: Stratified by Household source water quality (insufficient comparisons)**



**Supplemental figure 7N: Geometric mean ratio of zinc protoporphyrin concentration**

**7N4: Stratified by Household sanitation (insufficient comparisons)**

Supplemental figure 7N: Geometric mean ratio of zinc protoporphyrin concentration

7N5: Stratified by Season at the time of assessment

**P-for-interaction = 0.079**  
**Ratio of GMRs = 0.89 (0.77, 1.01)**

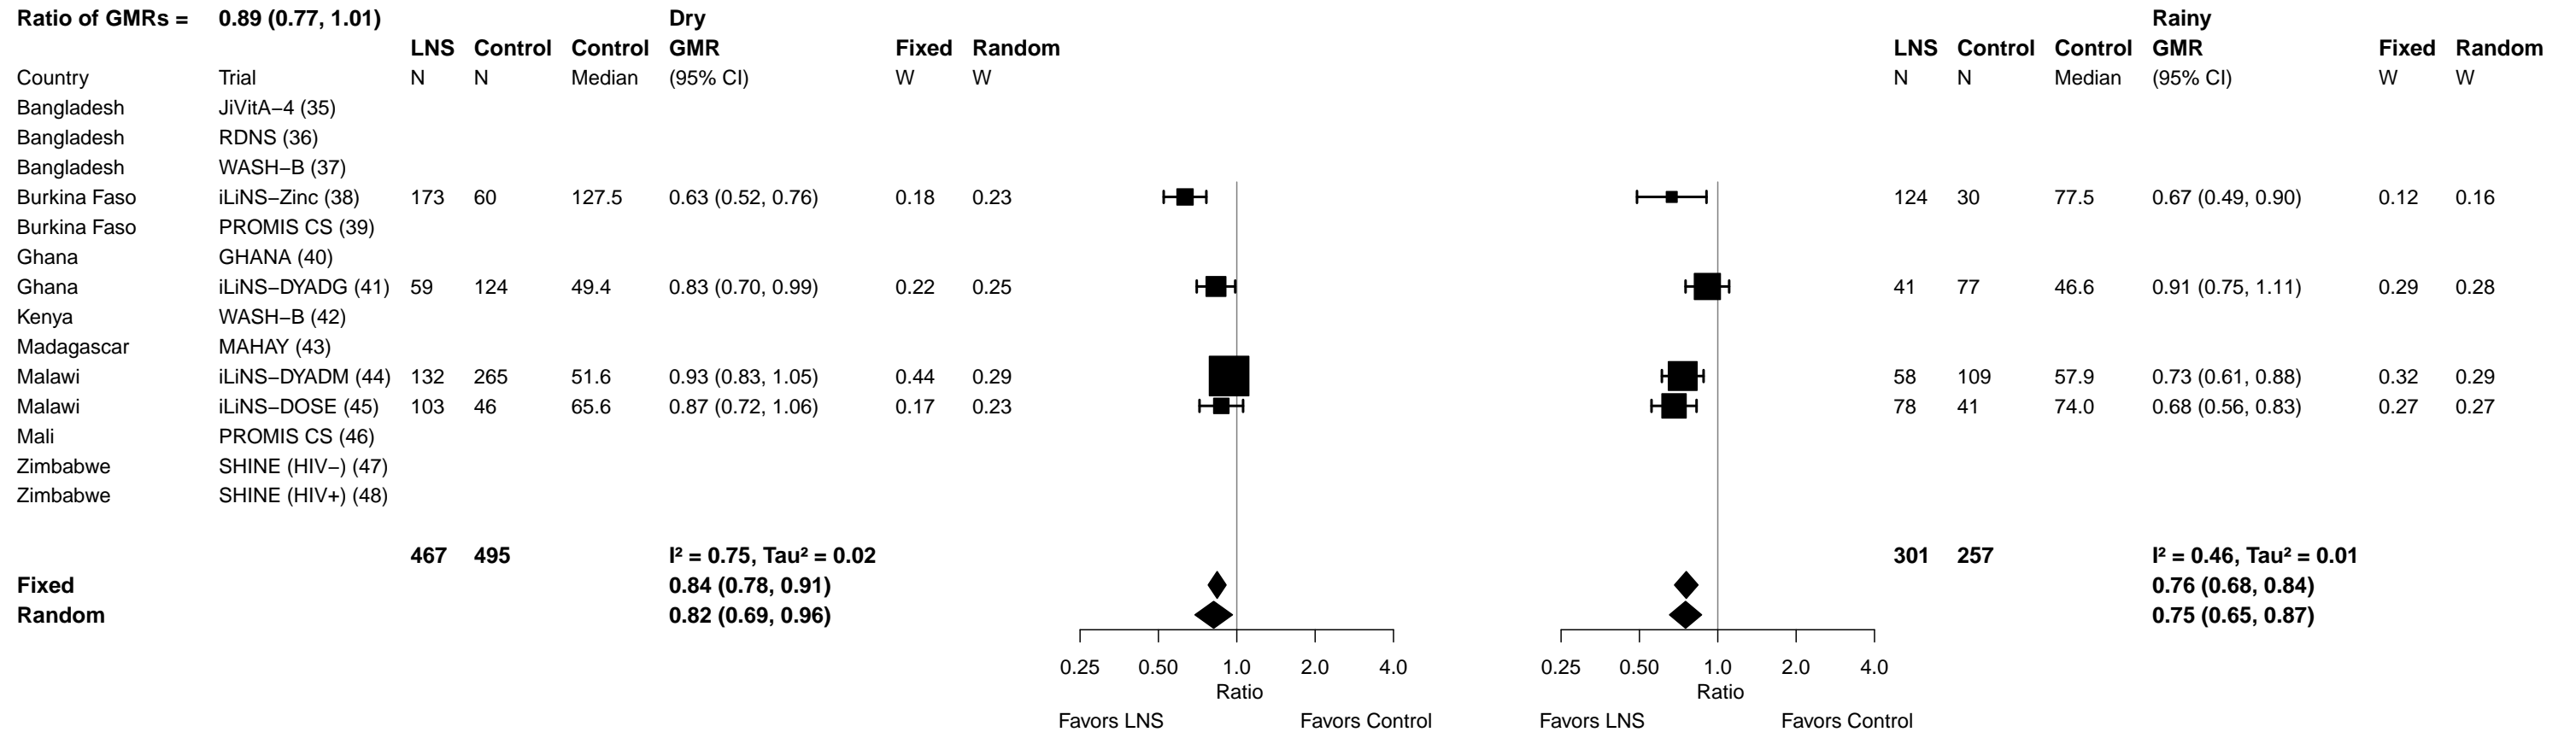

### Supplemental figure 7O: Elevated zinc protoporphyrin prevalence ratio

#### 7O1: Stratified by Household socio-economic status

**P-for-interaction = 0.894**

**Ratio of PRs = 0.98 (0.78, 1.24)**

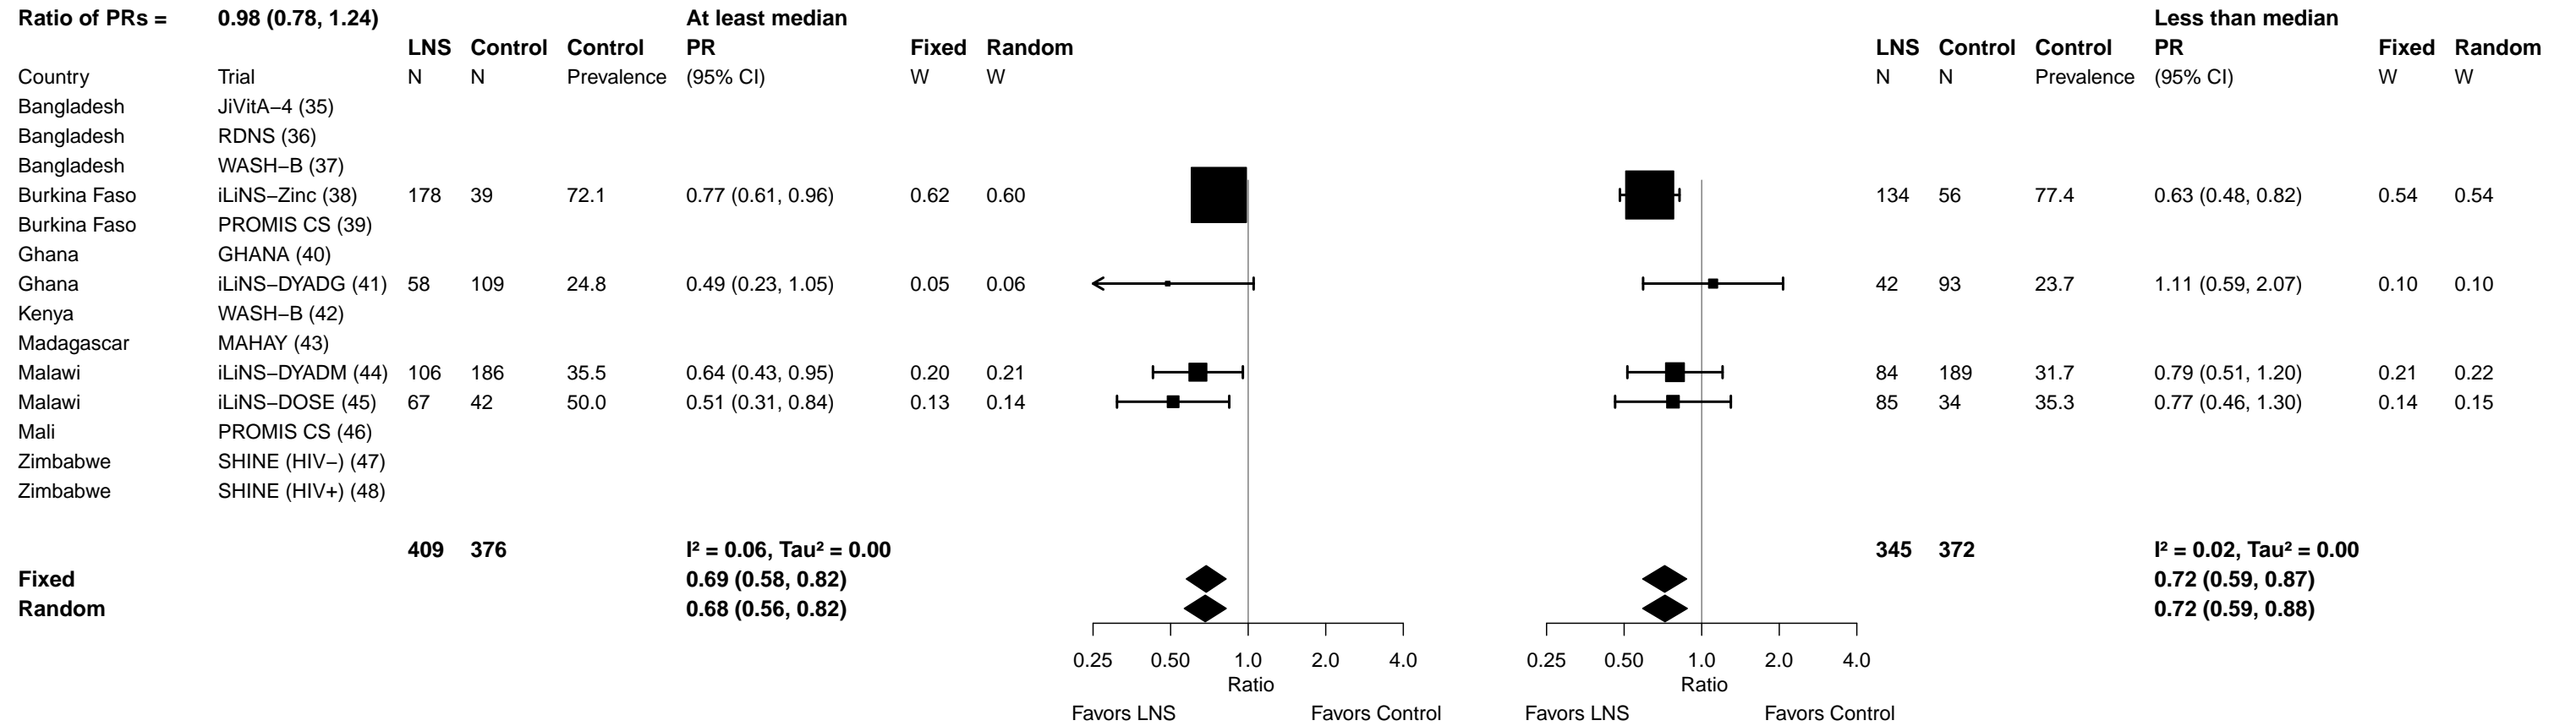

Supplemental figure 7O: Elevated zinc protoporphyrin prevalence ratio

7O2: Stratified by Household food insecurity

P-for-interaction = 0.790

Ratio of PRs = 0.97 (0.76, 1.23)

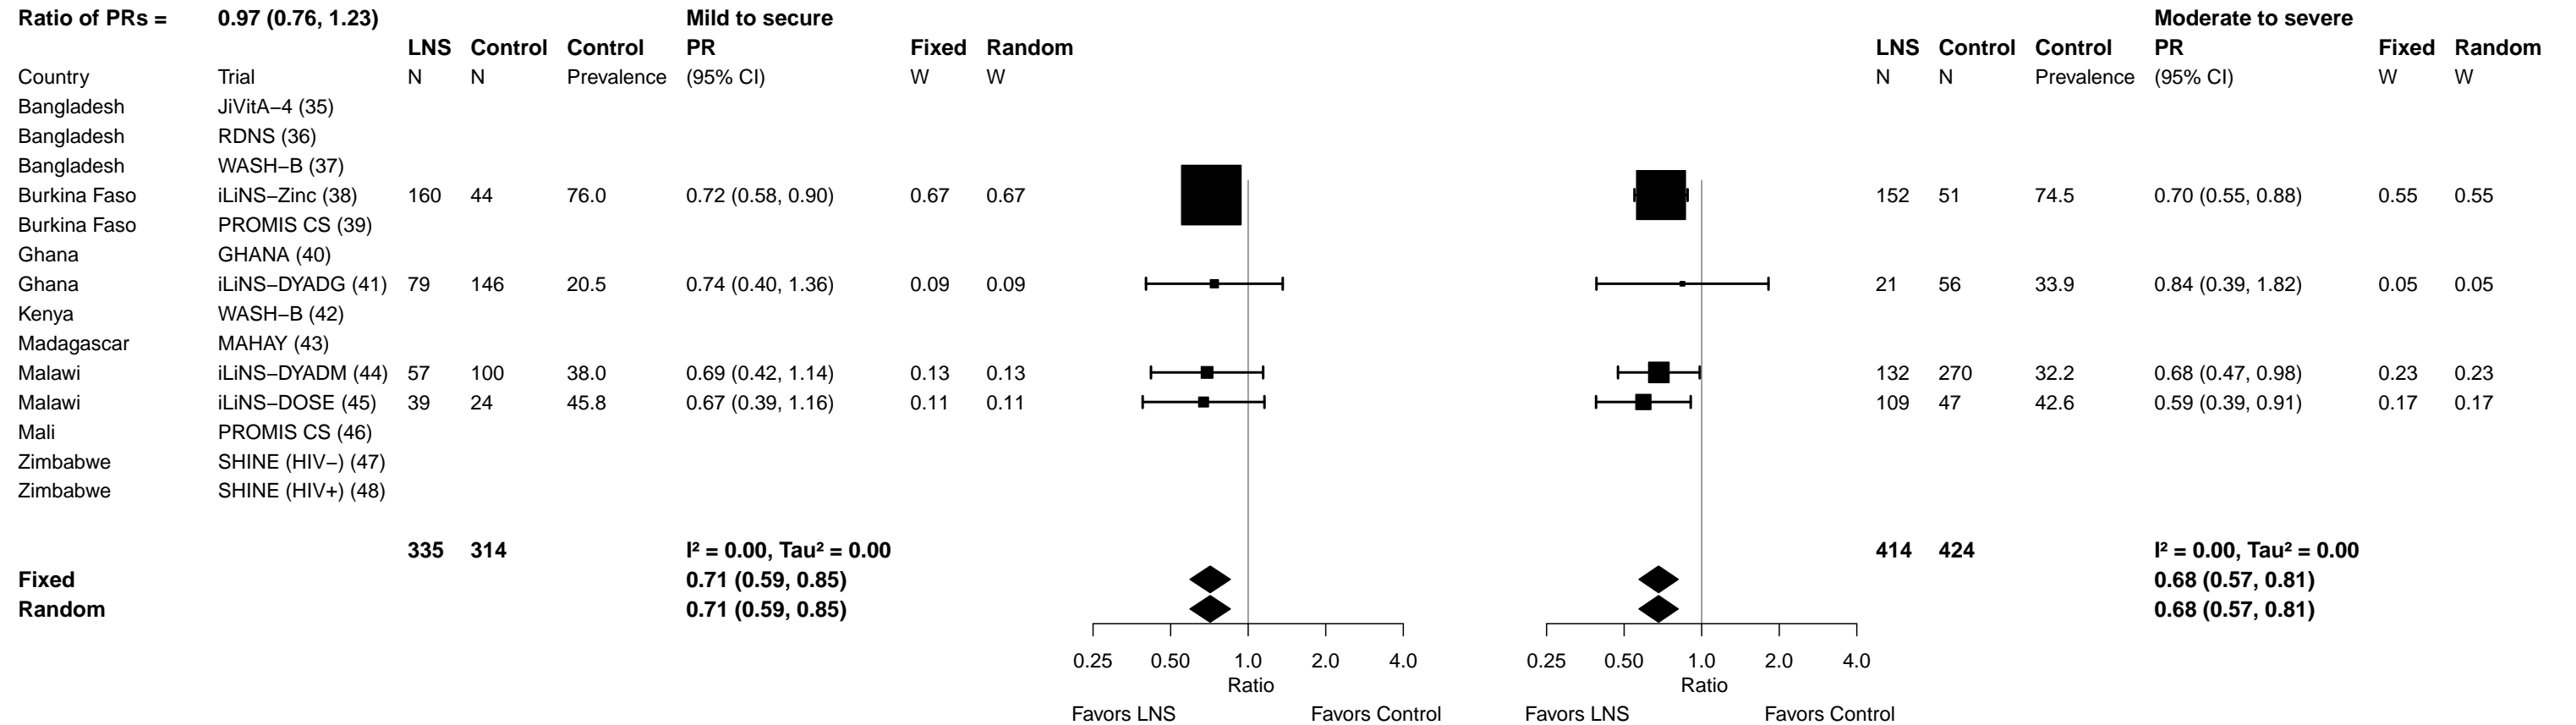

**Supplemental figure 7O: Elevated zinc protoporphyrin prevalence ratio**

**7O3: Stratified by Household source water quality (insufficient comparisons)**

**Supplemental figure 7O: Elevated zinc protoporphyrin prevalence ratio**

**7O4: Stratified by Household sanitation (insufficient comparisons)**



### Supplemental figure 7P: Elevated zinc protoporphyrin prevalence difference

#### 7P1: Stratified by Household socio-economic status

**P-for-interaction = 0.191**

**Difference in PDs = 0.06 (-0.03, 0.16)**

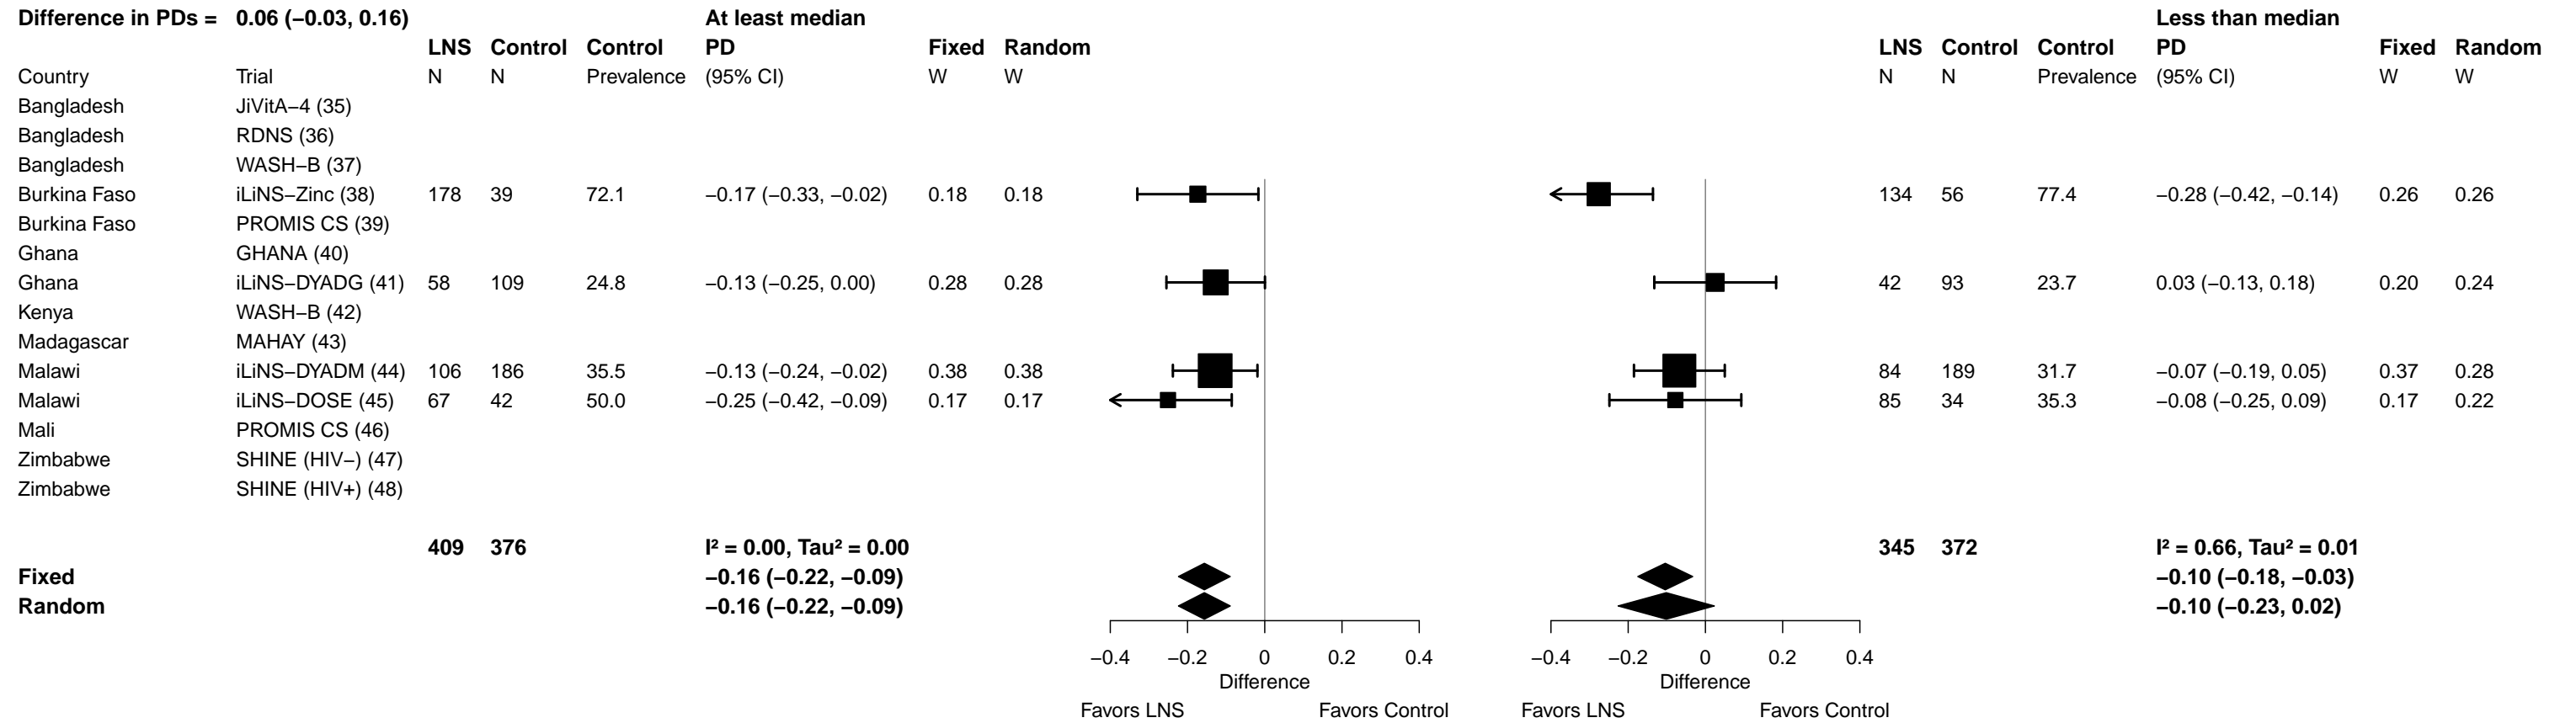



Supplemental figure 7P: Elevated zinc protoporphyrin prevalence difference

7P2: Stratified by Household food insecurity

P-for-interaction = 0.945

Difference in PDs = 0.00 (-0.11, 0.10)

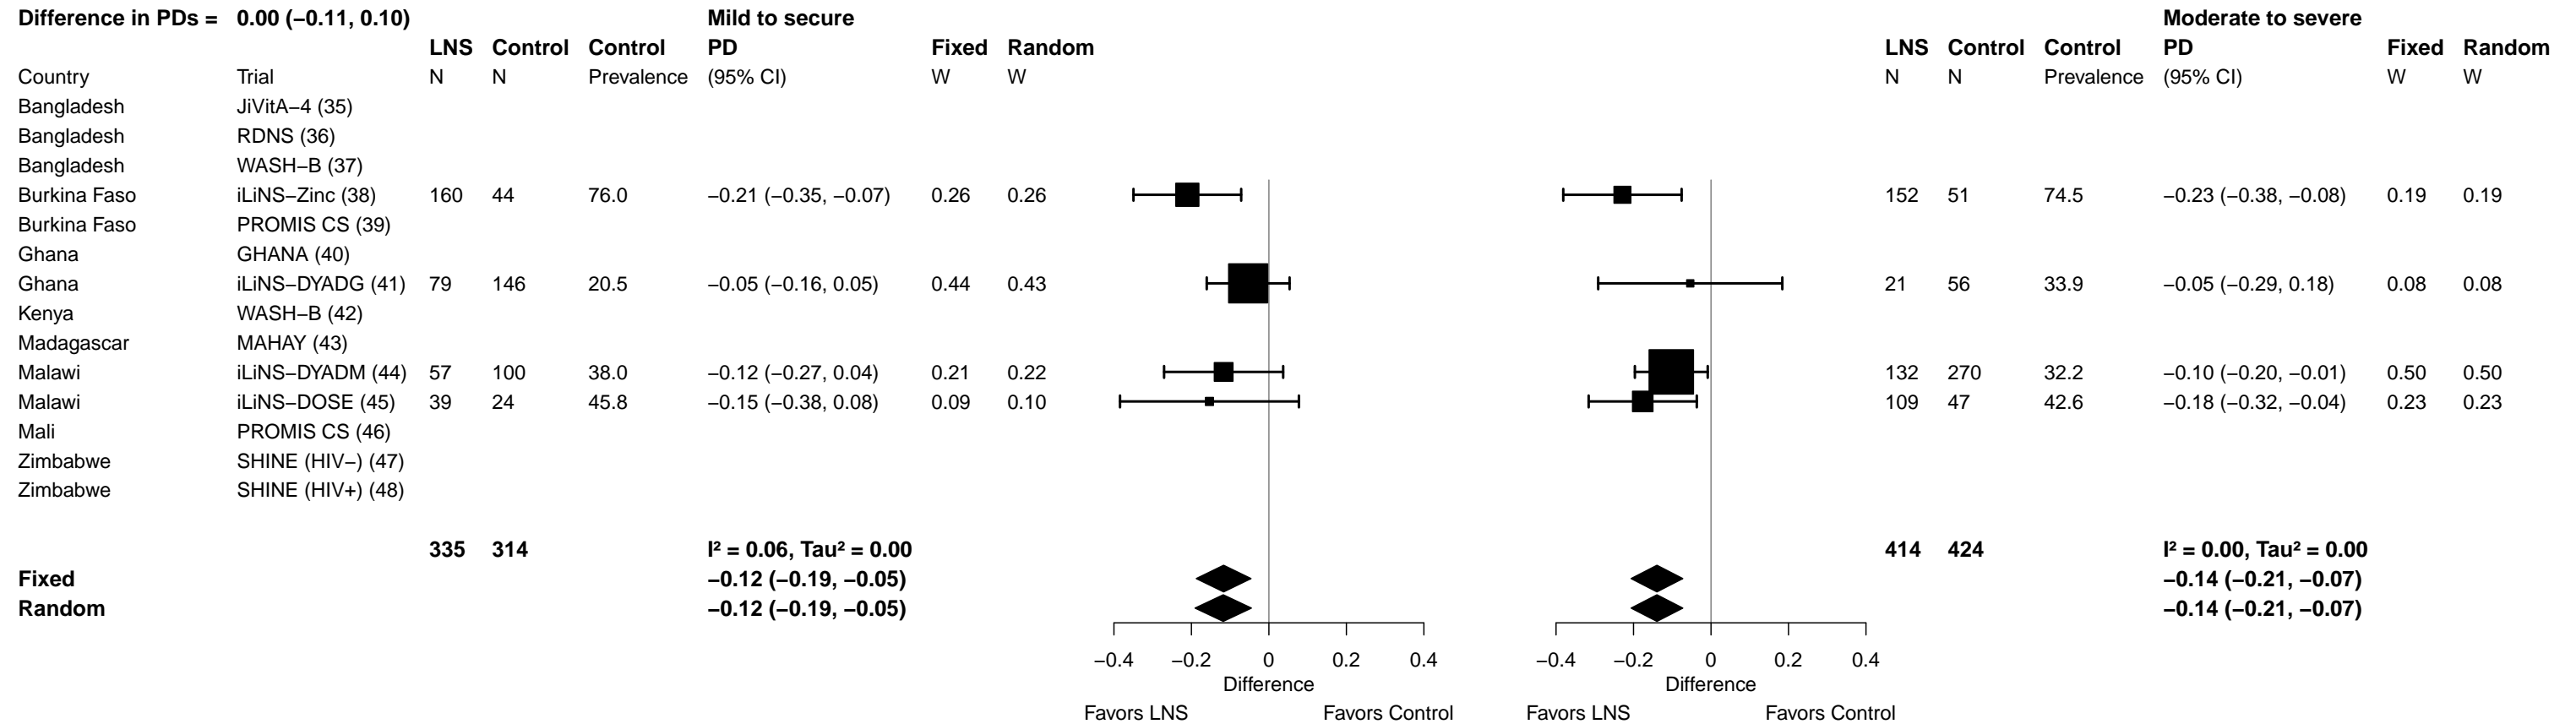

**Supplemental figure 7P: Elevated zinc protoporphyrin prevalence difference**

**7P3: Stratified by Household source water quality (insufficient comparisons)**

**Supplemental figure 7P: Elevated zinc protoporphyrin prevalence difference**

**7P4: Stratified by Household sanitation (insufficient comparisons)**

Supplemental figure 7P: Elevated zinc protoporphyrin prevalence difference

7P5: Stratified by Season at the time of assessment

P-for-interaction = 0.874

Difference in PDs = 0.01 (-0.09, 0.11)

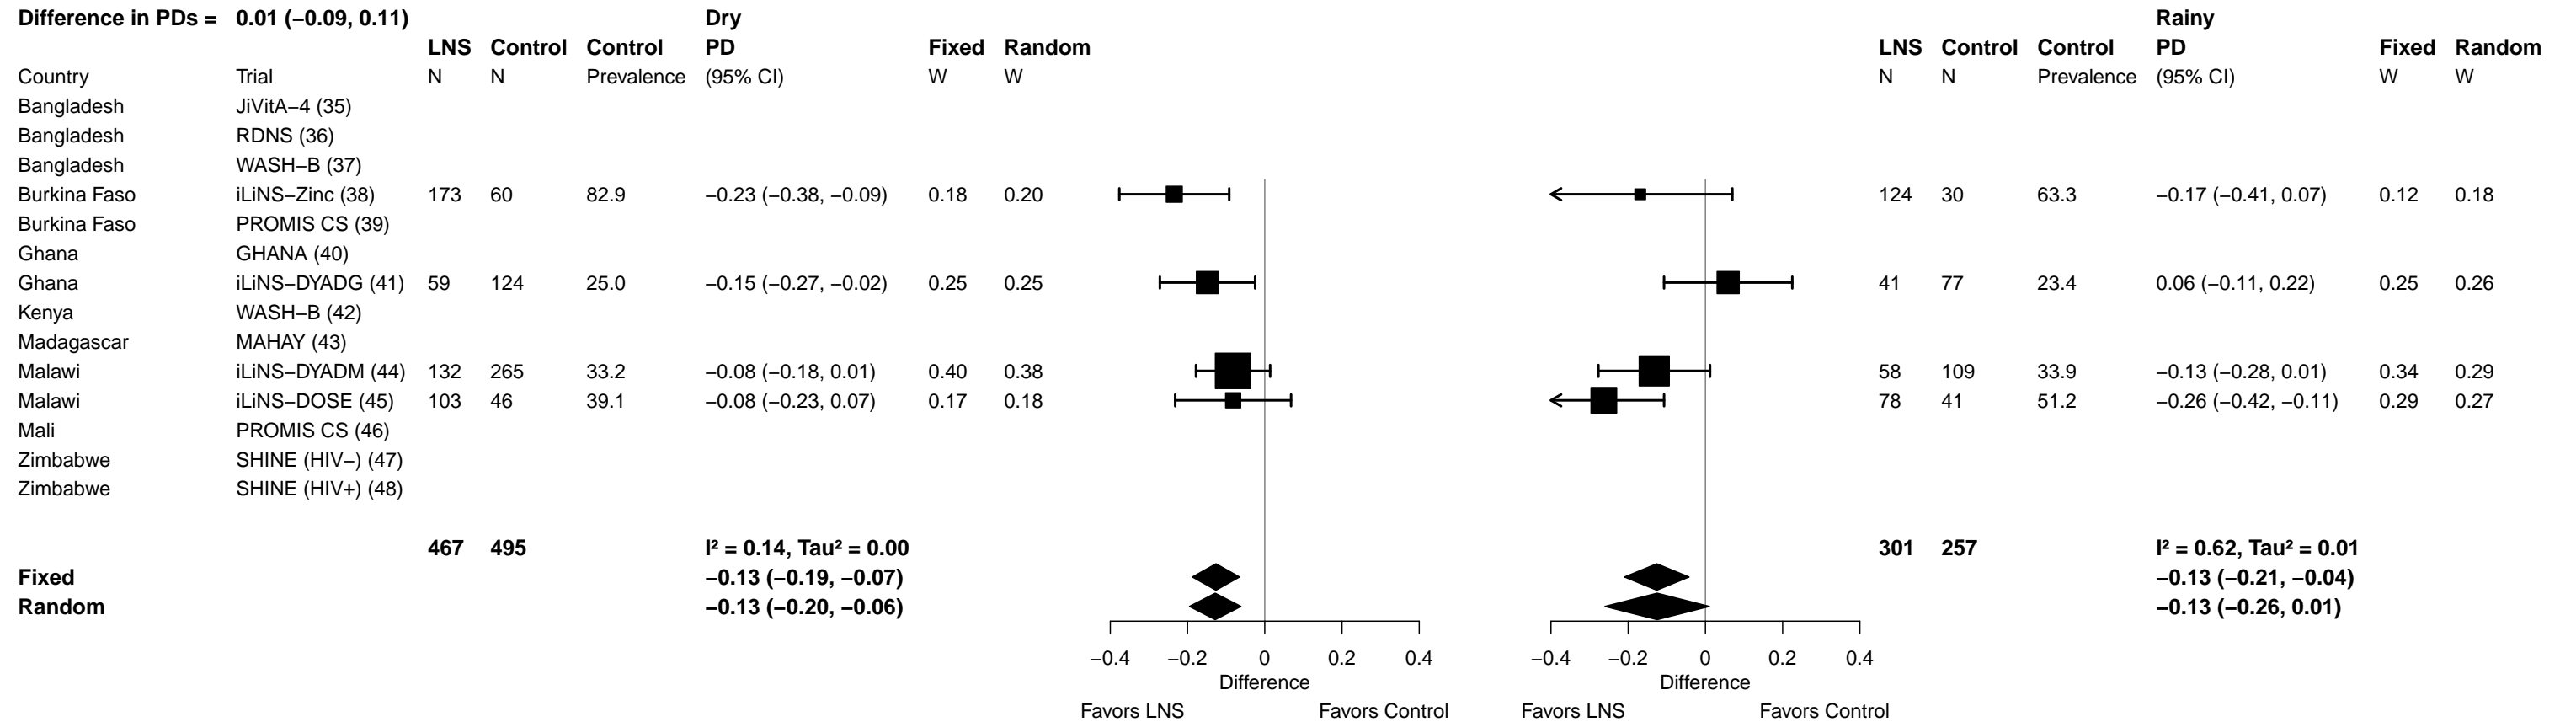

### Supplemental figure 7Q: Geometric mean ratio of plasma zinc concentration

#### 7Q1: Stratified by Household socio-economic status

**P-for-interaction = 0.696**  
**Ratio of GMRs = 0.99 (0.94, 1.04)**

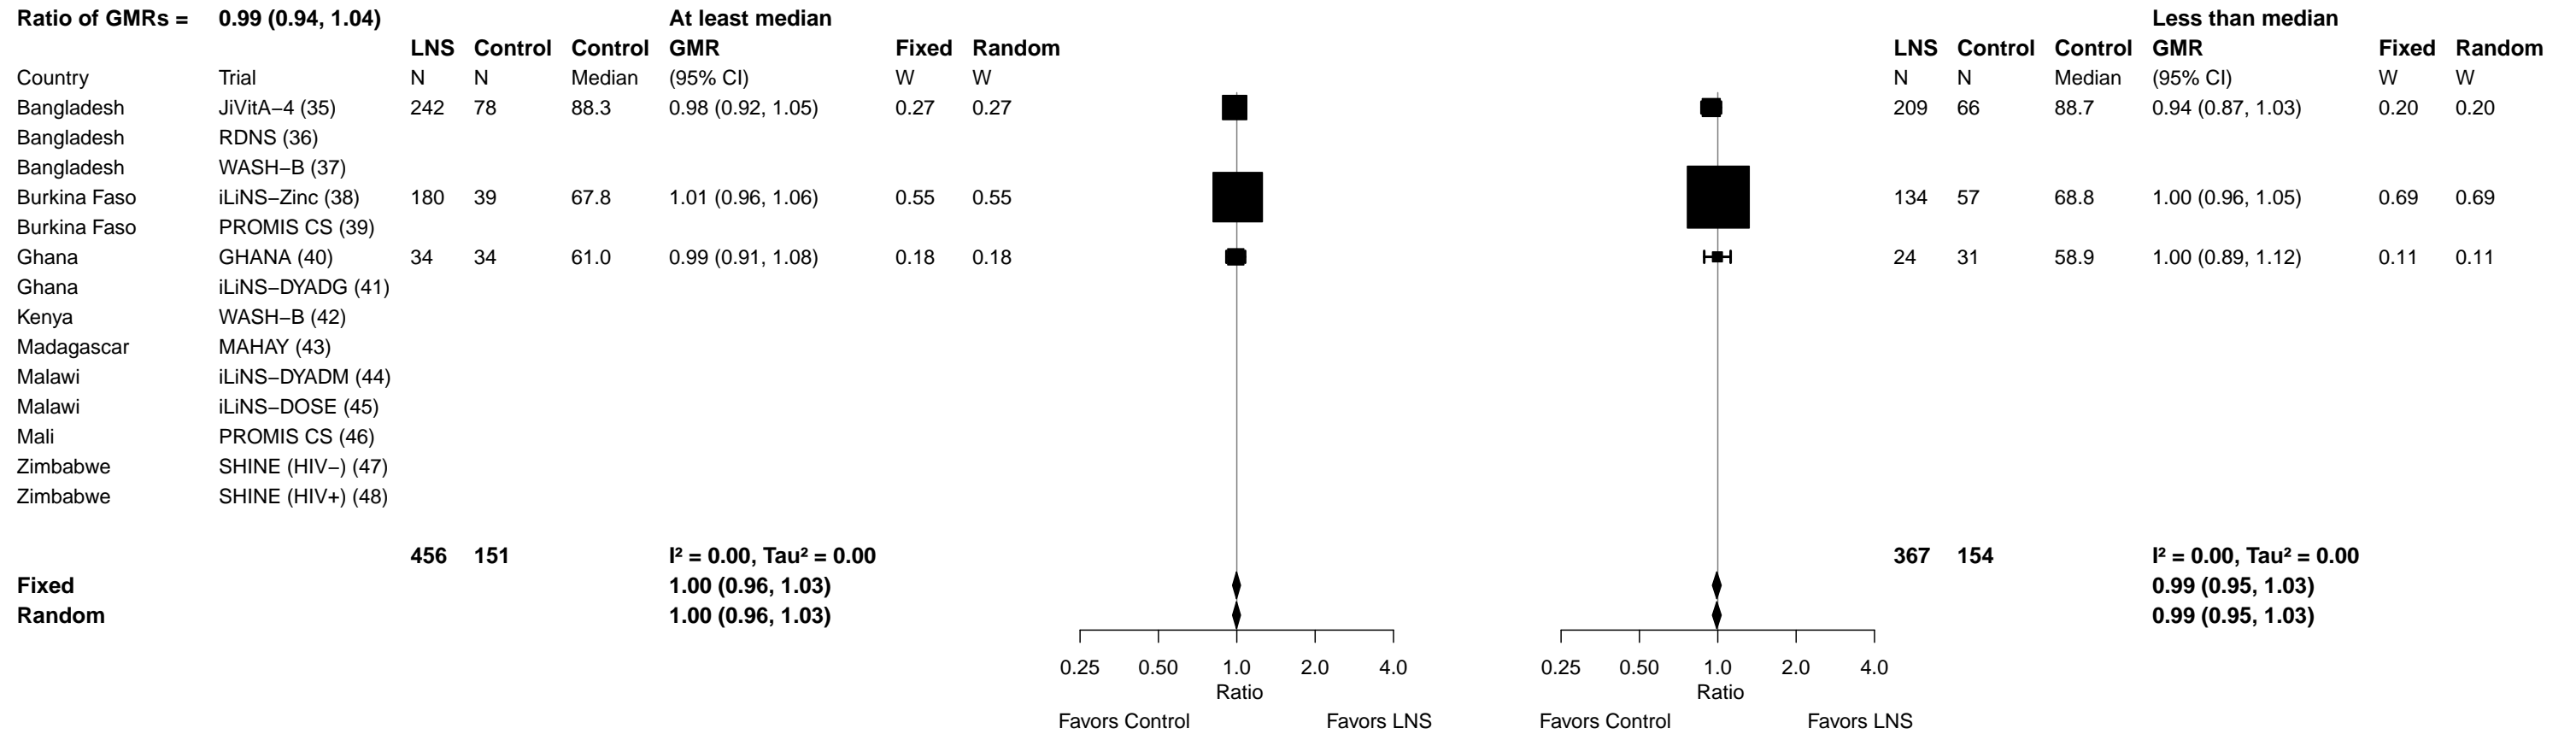

**Supplemental figure 7Q: Geometric mean ratio of plasma zinc concentration**

**7Q2: Stratified by Household food insecurity (insufficient comparisons)**

**Supplemental figure 7Q: Geometric mean ratio of plasma zinc concentration**

**7Q3: Stratified by Household source water quality (insufficient comparisons)**

**Supplemental figure 7Q: Geometric mean ratio of plasma zinc concentration**

**7Q4: Stratified by Household sanitation (insufficient comparisons)**



Supplemental figure 7Q: Geometric mean ratio of plasma zinc concentration

7Q5: Stratified by Season at the time of assessment

**P-for-interaction = 0.044**  
**Ratio of GMRs = 1.04 (1.00, 1.08)**

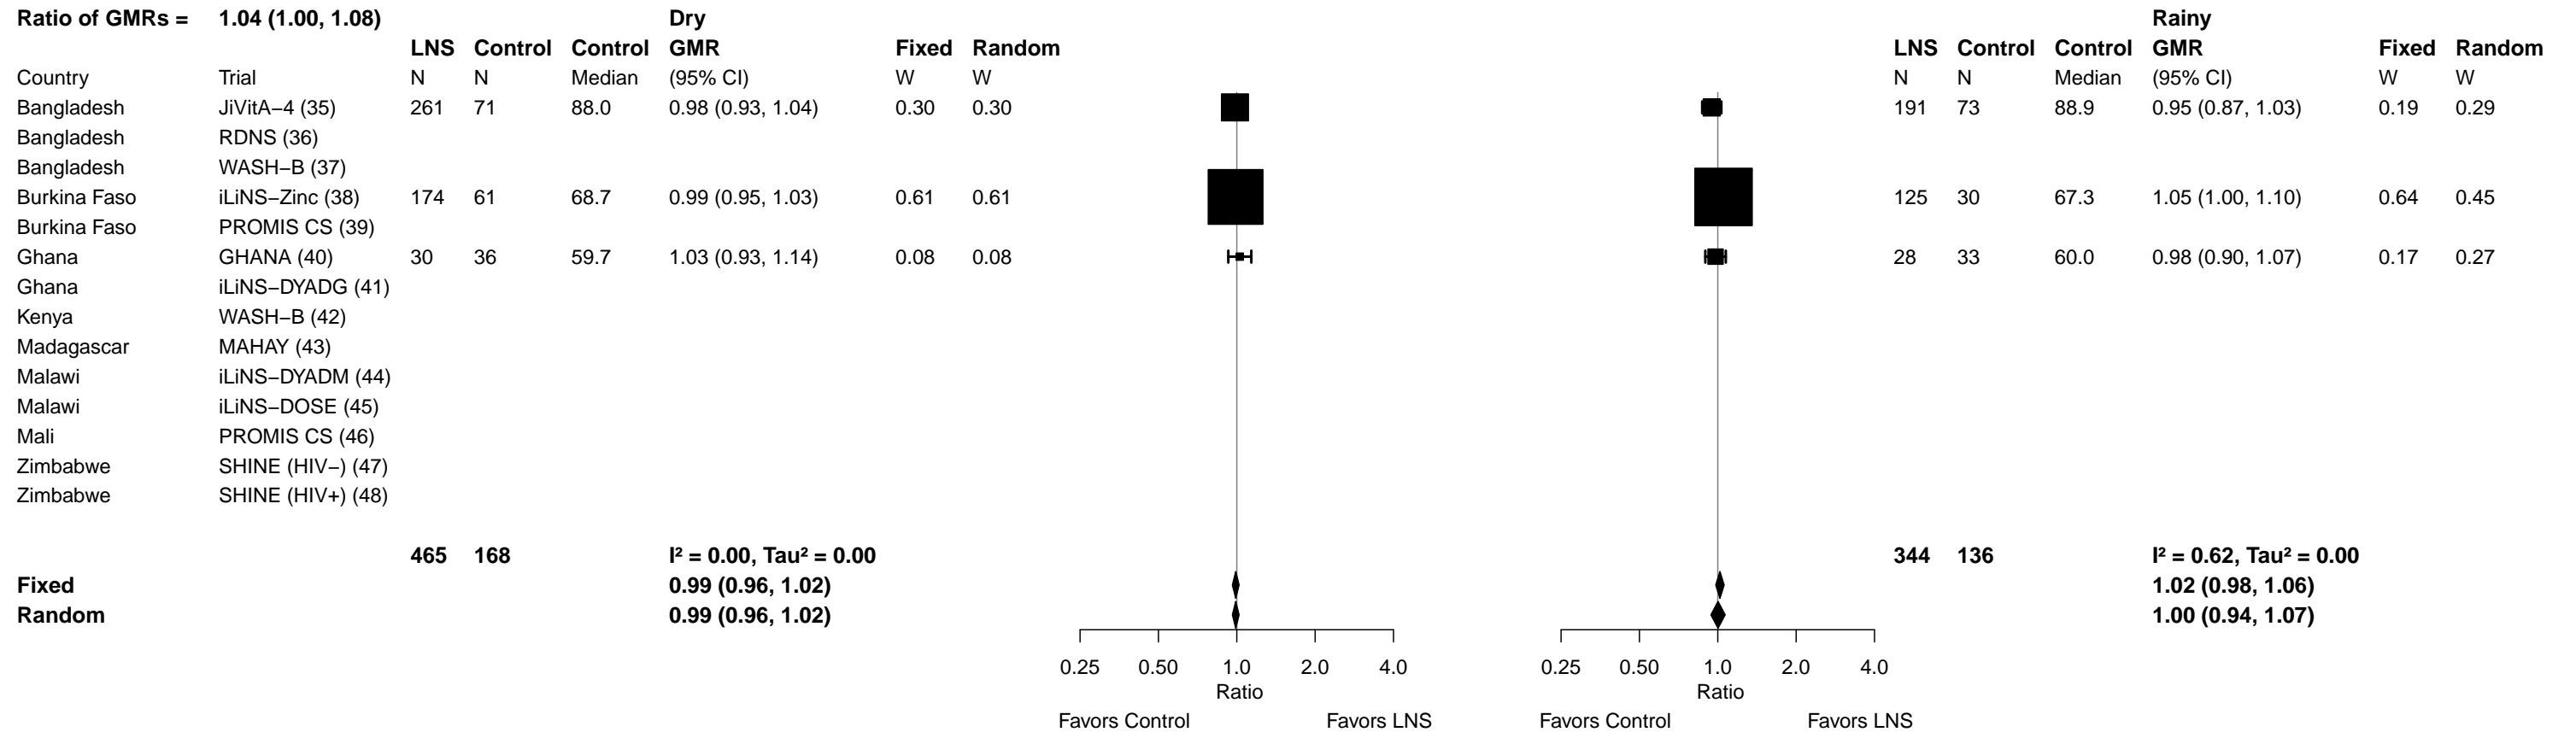

### Supplemental figure 7R: Geometric mean ratio of retinol concentration

#### 7R1: Stratified by Household socio-economic status

**P-for-interaction = 0.882**  
**Ratio of GMRs = 1.01 (0.94, 1.08)**

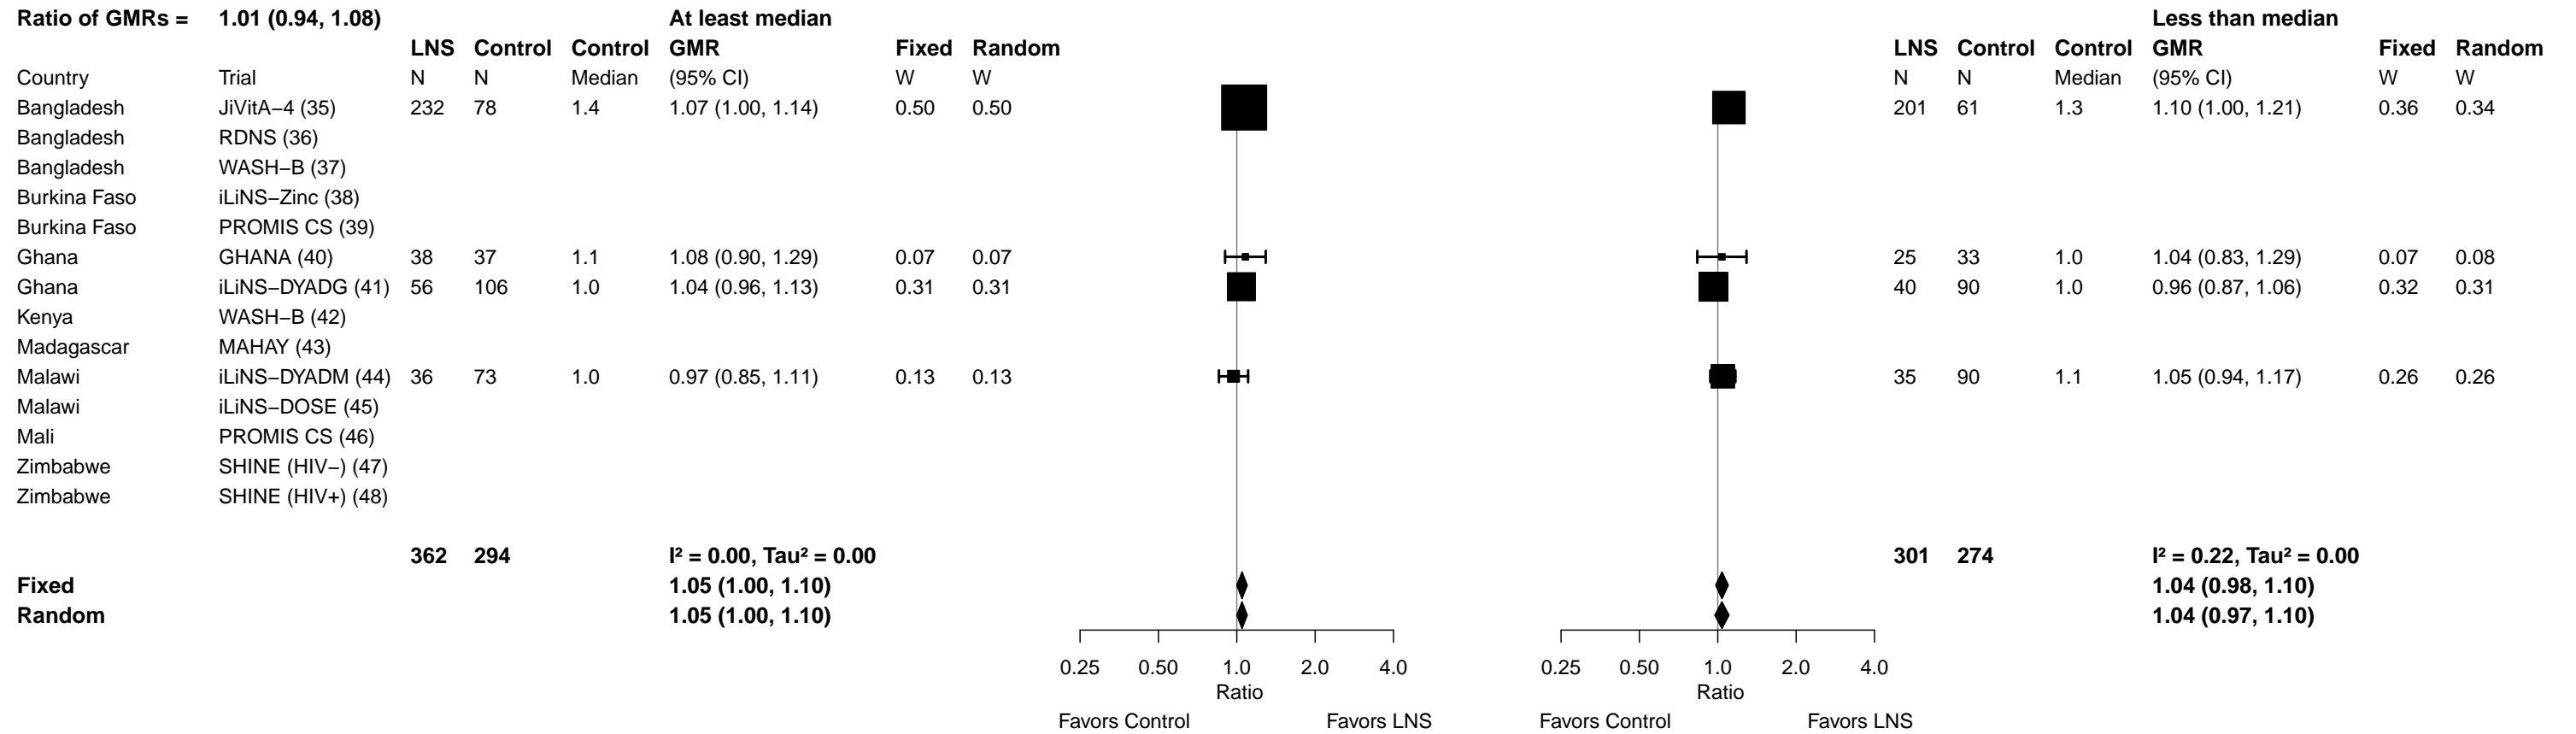

Supplemental figure 7R: Geometric mean ratio of retinol concentration

7R2: Stratified by Household food insecurity

**P-for-interaction = 0.084**  
**Ratio of GMRs = 0.93 (0.85, 1.01)**

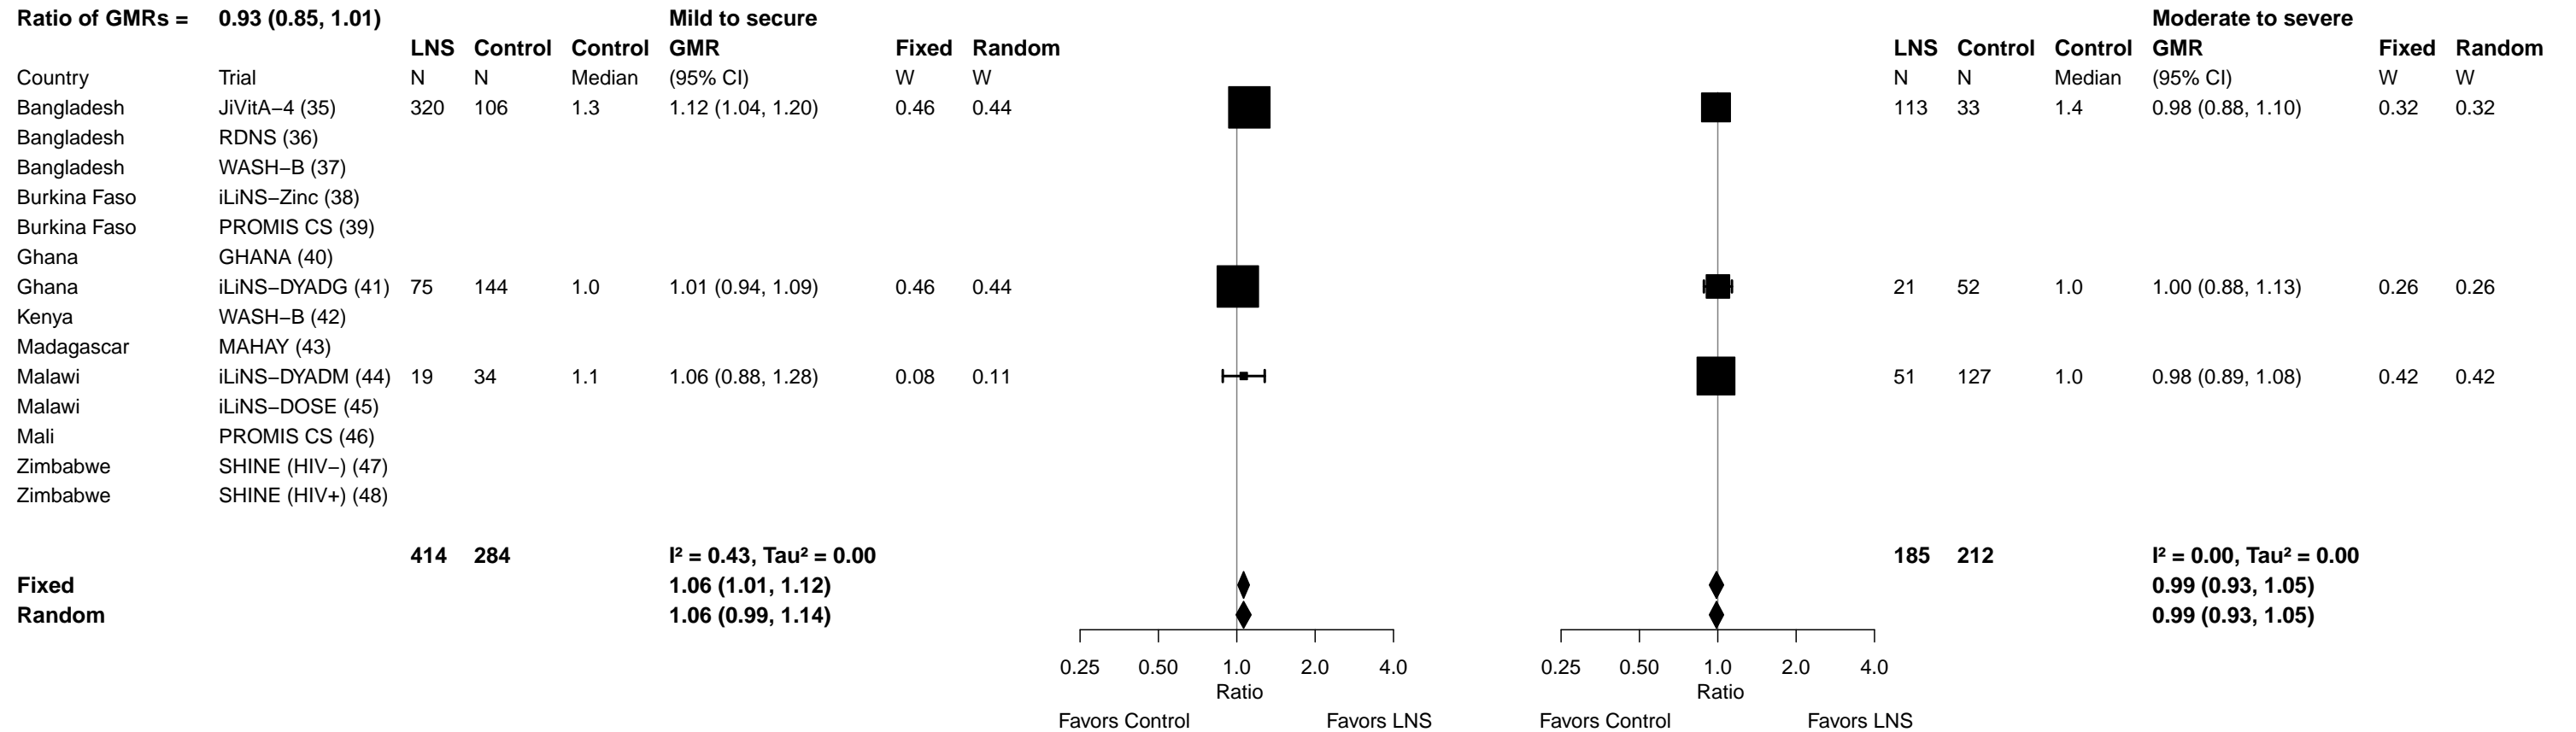

**Supplemental figure 7R: Geometric mean ratio of retinol concentration**

**7R3: Stratified by Household source water quality (insufficient comparisons)**

**Supplemental figure 7R: Geometric mean ratio of retinol concentration**

**7R4: Stratified by Household sanitation (insufficient comparisons)**

Supplemental figure 7R: Geometric mean ratio of retinol concentration

7R5: Stratified by Season at the time of assessment

**P-for-interaction = 0.952**  
**Ratio of GMRs = 1.00 (0.93, 1.08)**

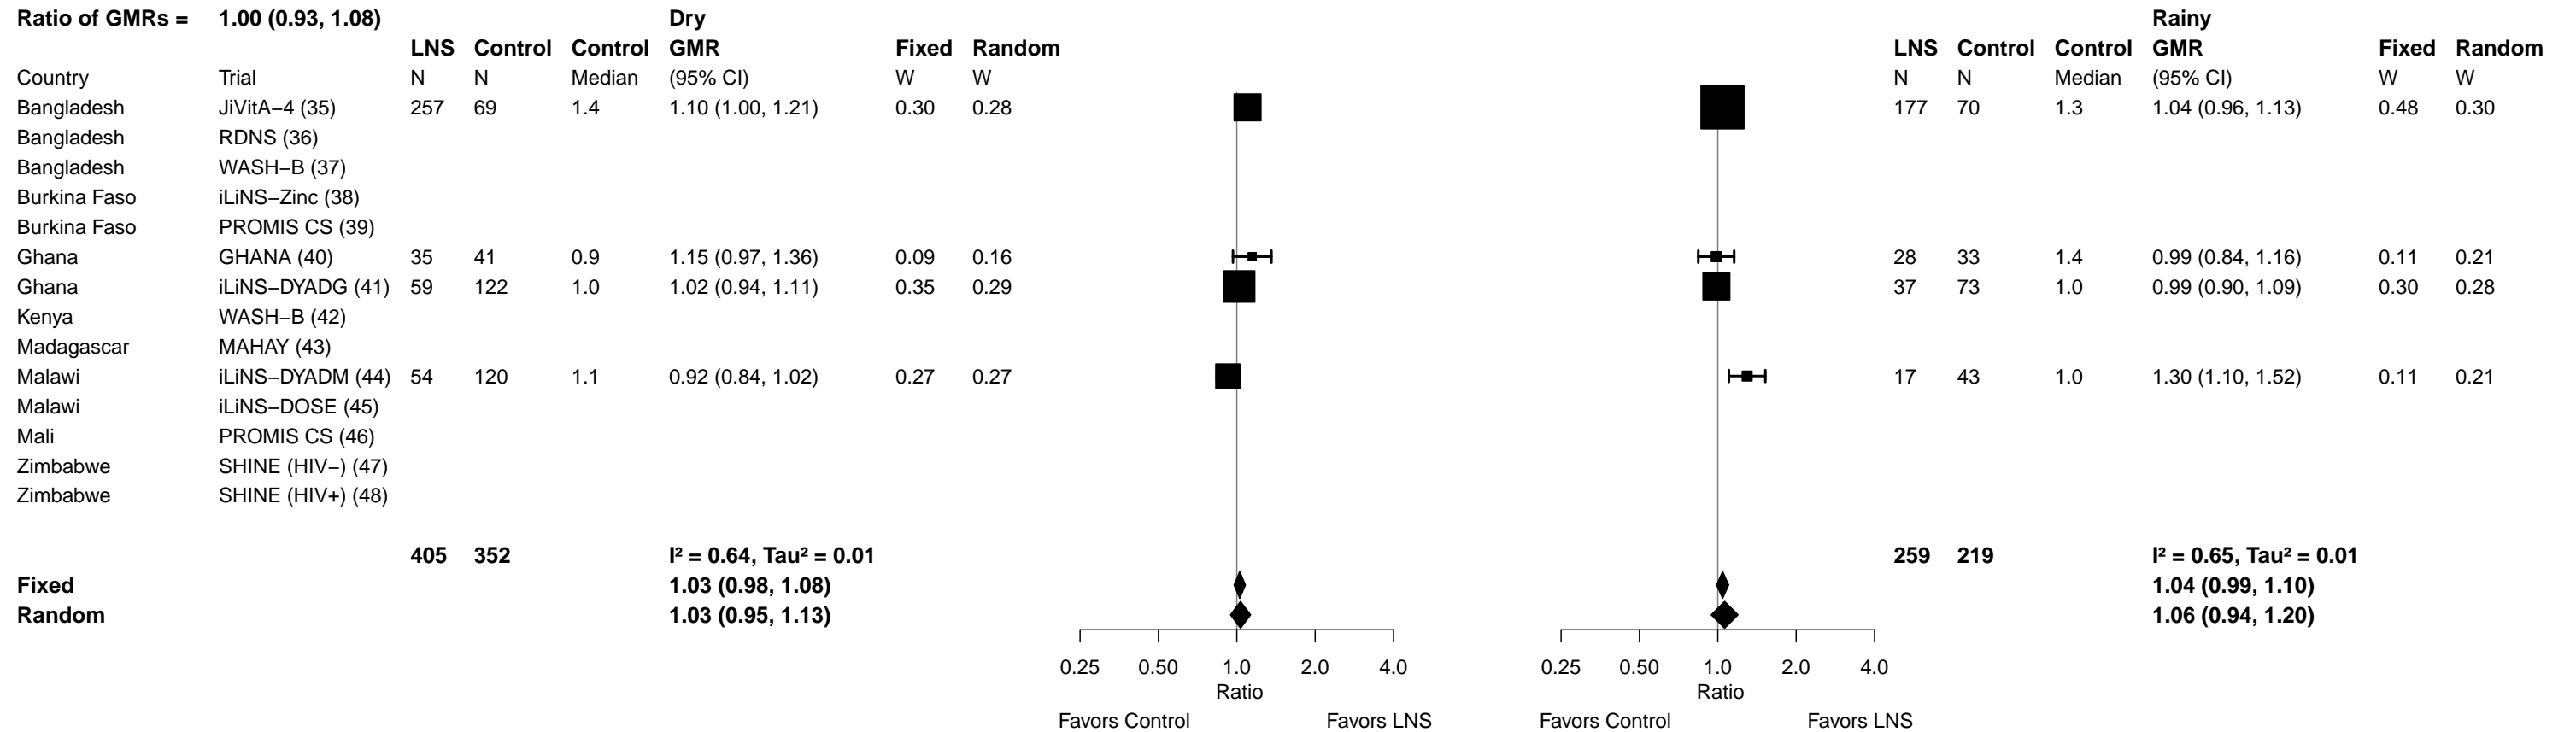

**Supplemental figure 7S: Low vitamin A (retinol < 0.70 µmol/L) prevalence ratio**

**7S1: Stratified by Household socio-economic status (insufficient comparisons)**

**Supplemental figure 7S: Low vitamin A (retinol < 0.70 µmol/L) prevalence ratio**

**7S2: Stratified by Household food insecurity (insufficient comparisons)**



Supplemental figure 7S: Low vitamin A (retinol < 0.70  $\mu\text{mol/L}$ ) prevalence ratio

7S3: Stratified by Household source water quality (insufficient comparisons)

**Supplemental figure 7S: Low vitamin A (retinol < 0.70 µmol/L) prevalence ratio**

**7S4: Stratified by Household sanitation (insufficient comparisons)**

Supplemental figure 7S: Low vitamin A (retinol < 0.70 µmol/L) prevalence ratio

7S5: Stratified by Season at the time of assessment (insufficient comparisons)

**Supplemental figure 7T: Low vitamin A (retinol < 0.70 µmol/L) prevalence difference**

**7T1: Stratified by Household socio-economic status (insufficient comparisons)**

**Supplemental figure 7T: Low vitamin A (retinol < 0.70  $\mu\text{mol/L}$ ) prevalence difference**

**7T2: Stratified by Household food insecurity (insufficient comparisons)**

**Supplemental figure 7T: Low vitamin A (retinol < 0.70  $\mu\text{mol/L}$ ) prevalence difference**

**7T3: Stratified by Household source water quality (insufficient comparisons)**

Supplemental figure 7T: Low vitamin A (retinol < 0.70  $\mu\text{mol/L}$ ) prevalence difference

7T4: Stratified by Household sanitation (insufficient comparisons)

**Supplemental figure 7T: Low vitamin A (retinol < 0.70 µmol/L) prevalence difference**

**7T5: Stratified by Season at the time of assessment (insufficient comparisons)**





**Supplemental figure 7U: Marginal vitamin A (retinol < 1.05  $\mu\text{mol/L}$ ) prevalence ratio**

**7U2: Stratified by Household food insecurity (insufficient comparisons)**

**Supplemental figure 7U: Marginal vitamin A (retinol < 1.05 µmol/L) prevalence ratio**

**7U3: Stratified by Household source water quality (insufficient comparisons)**

**Supplemental figure 7U: Marginal vitamin A (retinol < 1.05  $\mu\text{mol/L}$ ) prevalence ratio**

**7U4: Stratified by Household sanitation (insufficient comparisons)**

Supplemental figure 7U: Marginal vitamin A (retinol < 1.05 µmol/L) prevalence ratio

7U5: Stratified by Season at the time of assessment

P-for-interaction = 0.615

Ratio of PRs = 1.09 (0.77, 1.54)

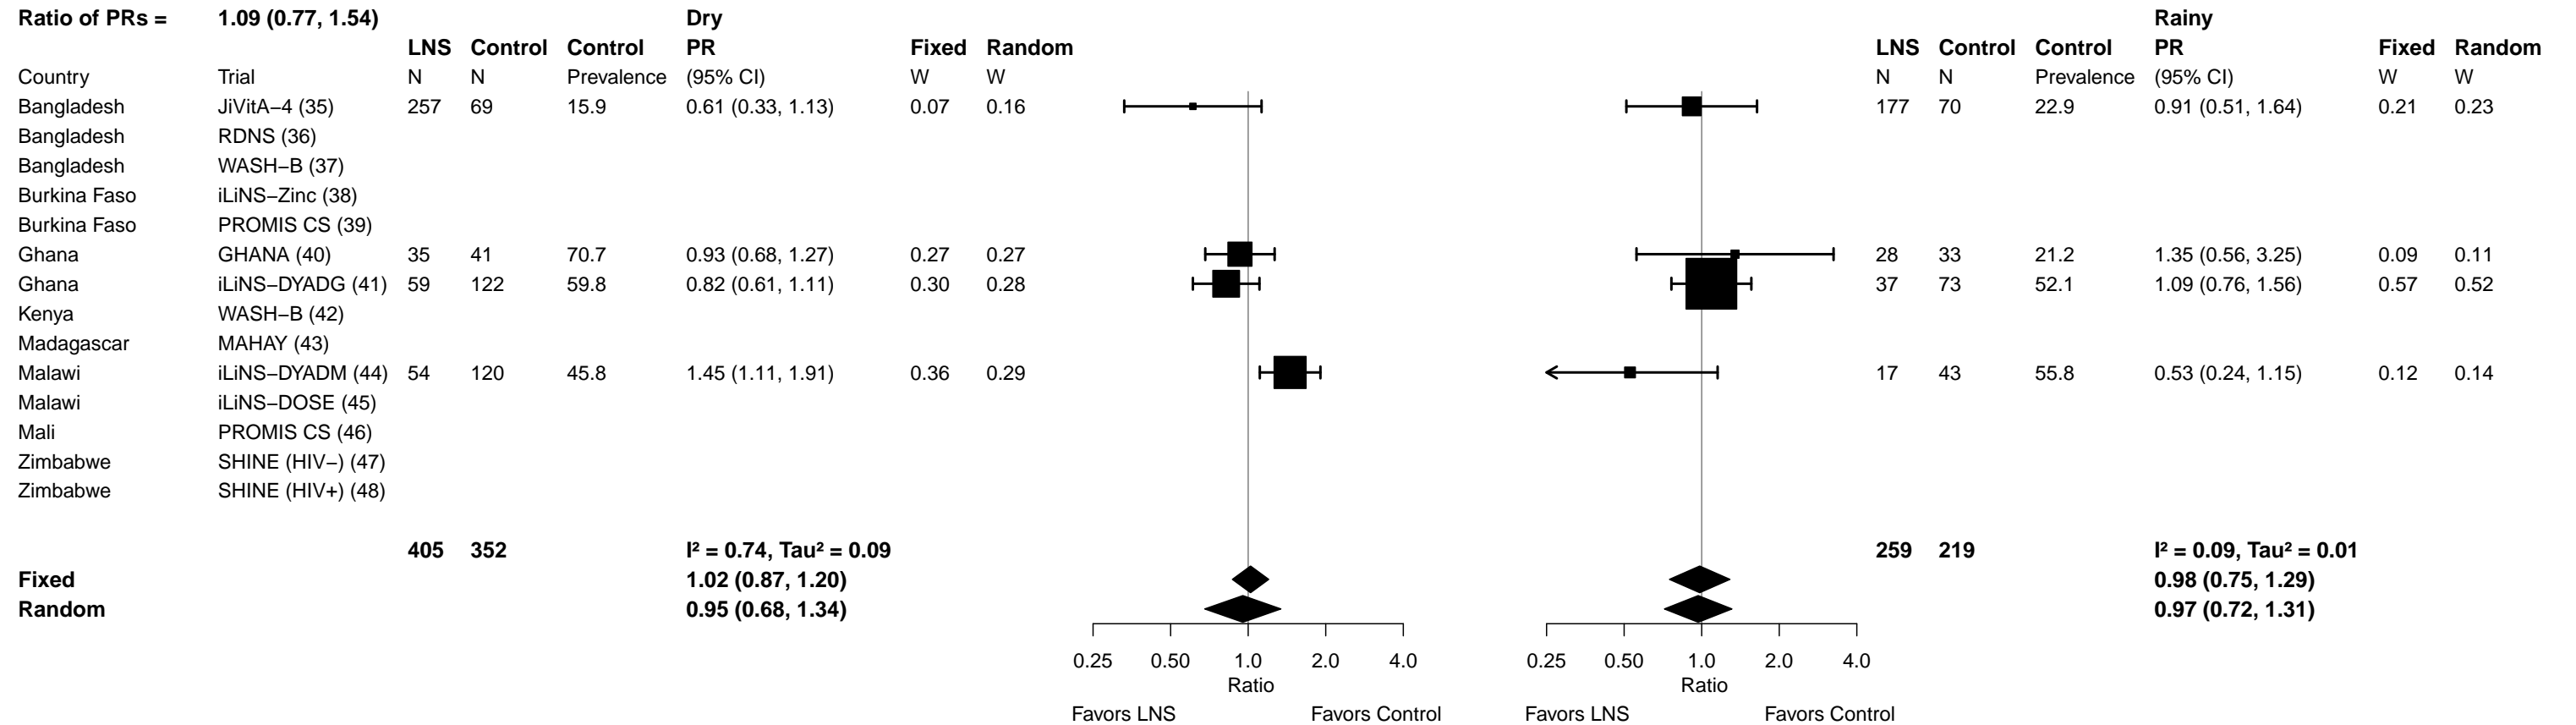

### Supplemental figure 7V: Marginal vitamin A (retinol < 1.05 µmol/L) prevalence difference

#### 7V1: Stratified by Household socio-economic status

P-for-interaction = 0.712

Difference in PDs = 0.02 (-0.09, 0.13)

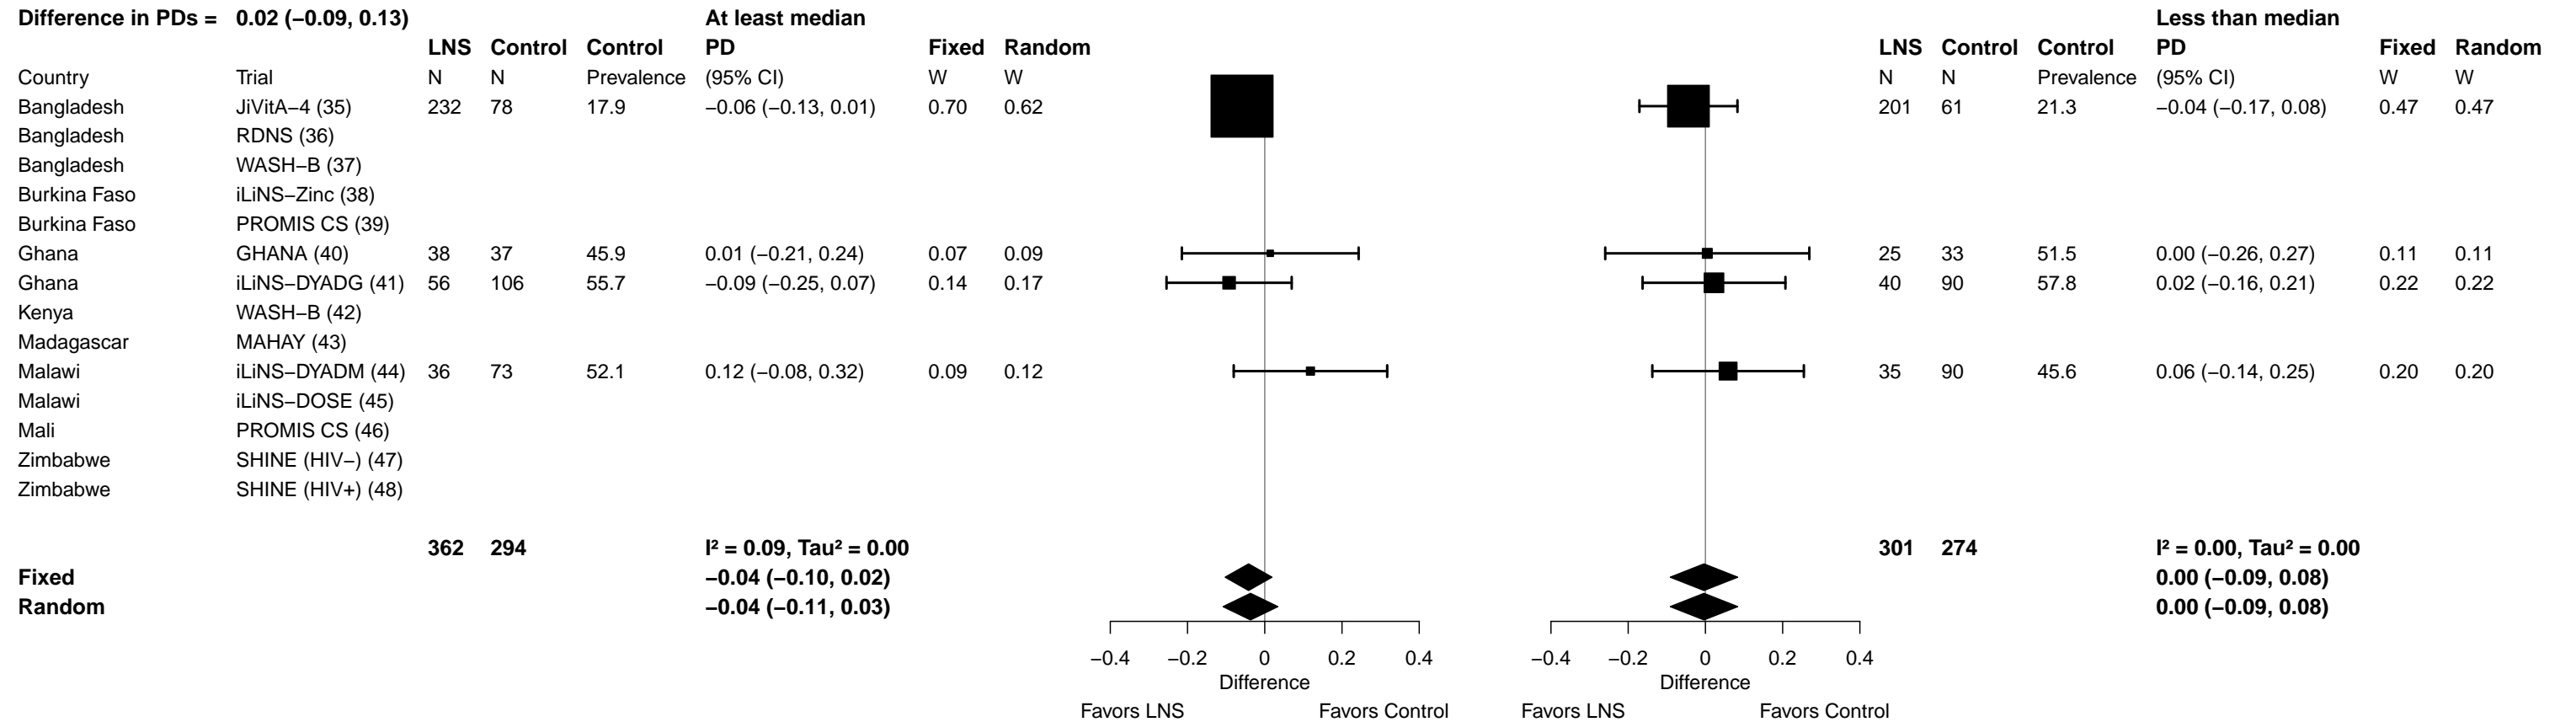

**Supplemental figure 7V: Marginal vitamin A (retinol < 1.05  $\mu\text{mol/L}$ ) prevalence difference**

**7V2: Stratified by Household food insecurity (insufficient comparisons)**

**Supplemental figure 7V: Marginal vitamin A (retinol < 1.05 µmol/L) prevalence difference**

**7V3: Stratified by Household source water quality (insufficient comparisons)**



**Supplemental figure 7V: Marginal vitamin A (retinol < 1.05 µmol/L) prevalence difference**

**7V4: Stratified by Household sanitation (insufficient comparisons)**

Supplemental figure 7V: Marginal vitamin A (retinol < 1.05 μmol/L) prevalence difference

7V5: Stratified by Season at the time of assessment

P-for-interaction = 0.888

Difference in PDs = 0.01 (-0.10, 0.12)

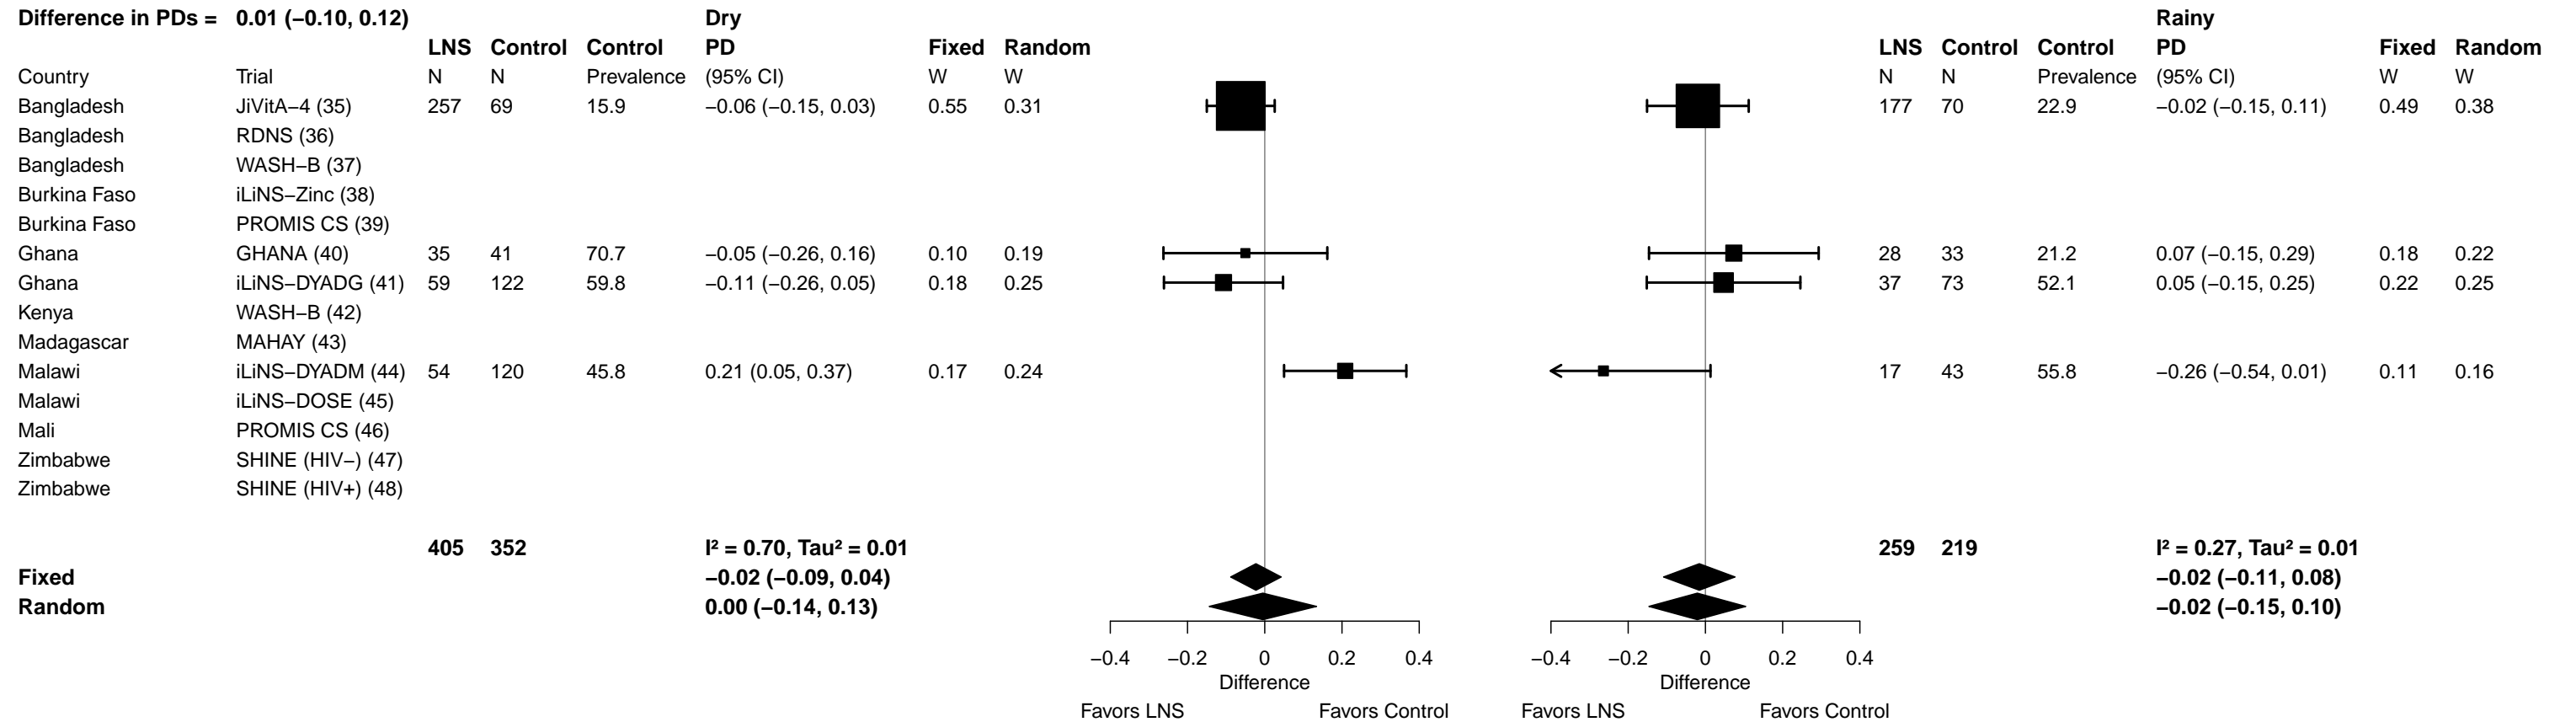

### Supplemental figure 7W: Geometric mean ratio of retinol binding protein concentration

#### 7W1: Stratified by Household socio-economic status

**P-for-interaction = 0.108**  
**Ratio of GMRs = 0.96 (0.92, 1.01)**

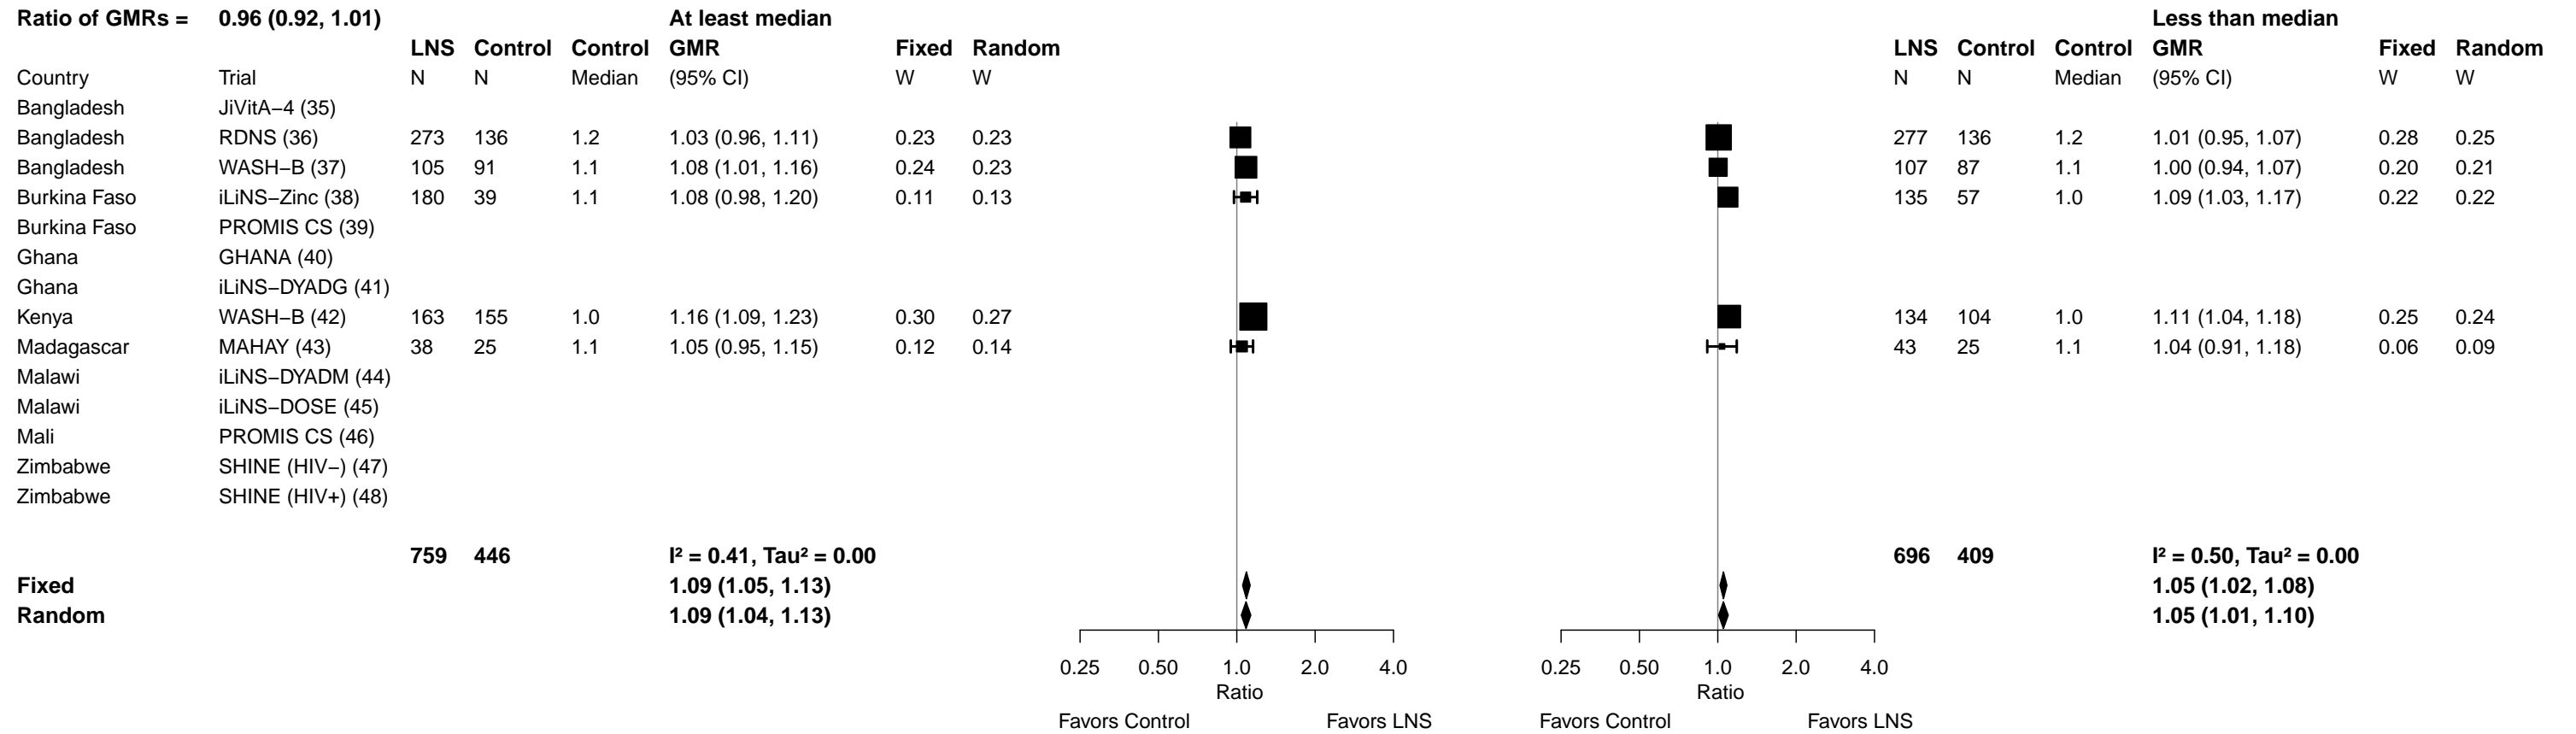

Supplemental figure 7W: Geometric mean ratio of retinol binding protein concentration

7W2: Stratified by Household food insecurity

**P-for-interaction = 0.183**  
**Ratio of GMRs = 1.04 (0.98, 1.09)**

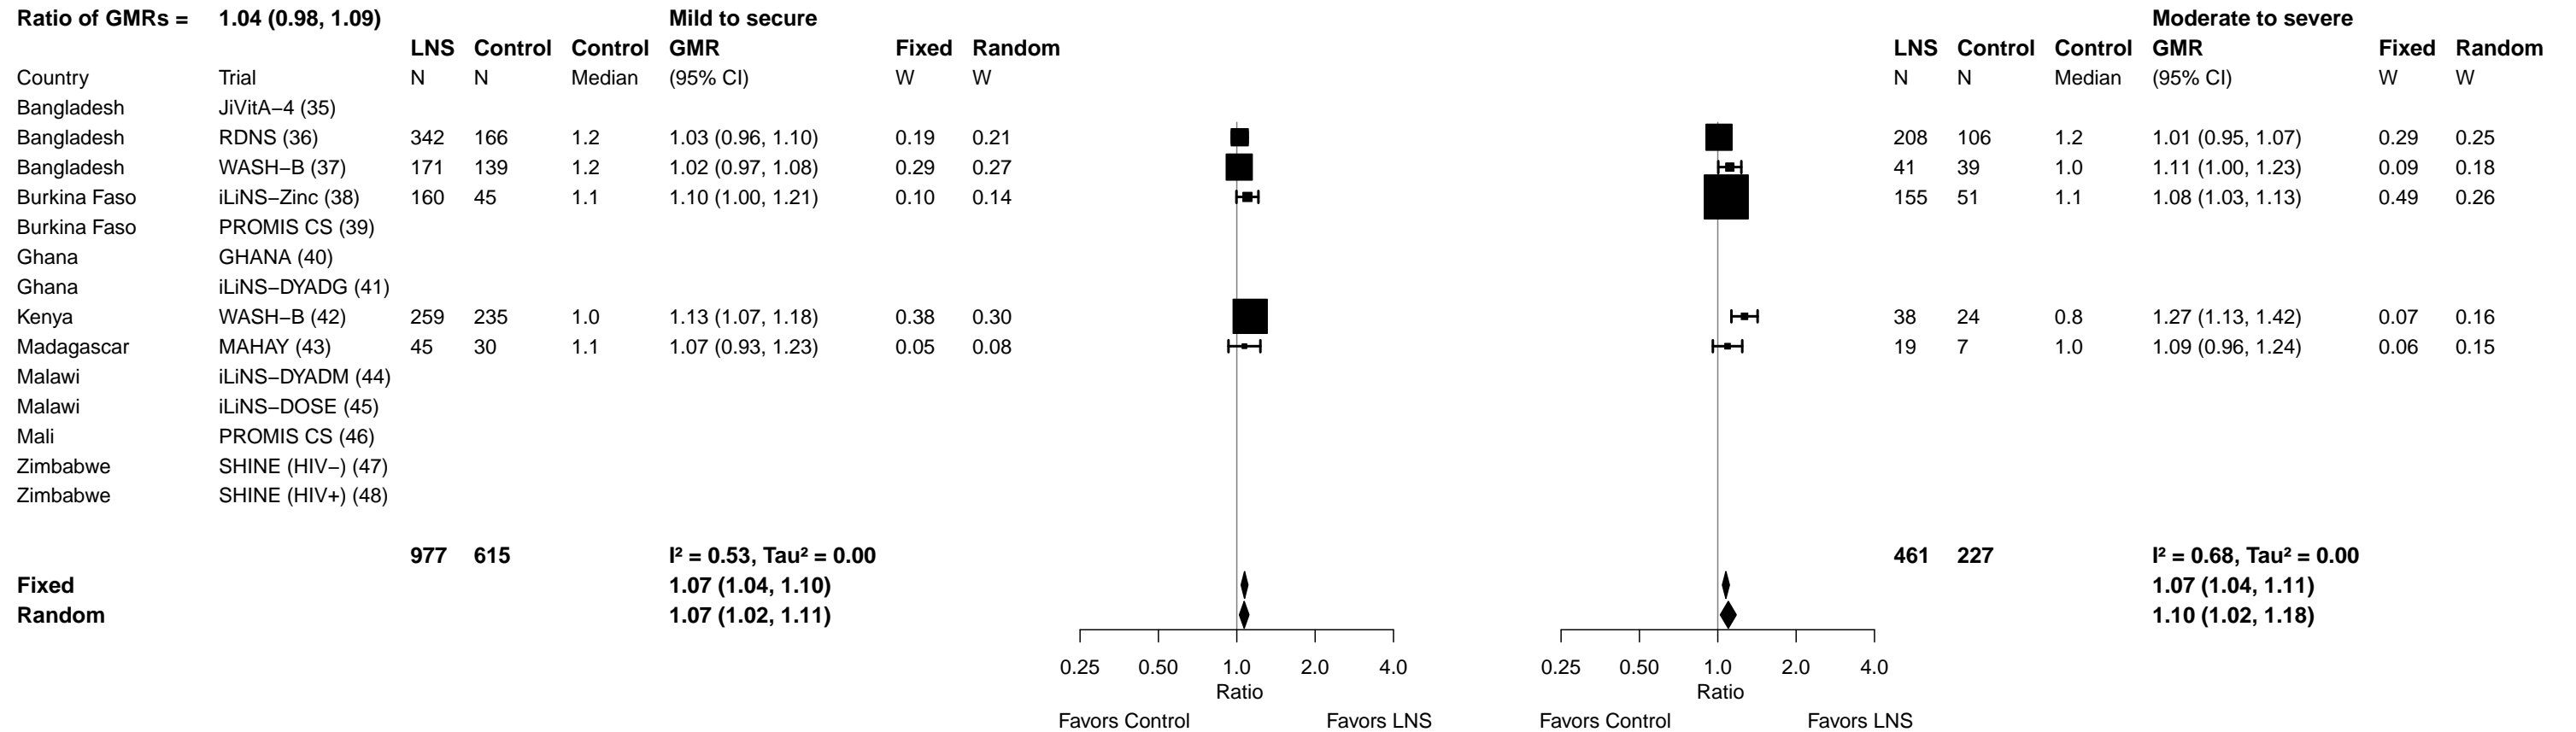

Supplemental figure 7W: Geometric mean ratio of retinol binding protein concentration

7W3: Stratified by Household source water quality

**P-for-interaction = 0.959**  
**Ratio of GMRs = 1.00 (0.92, 1.09)**

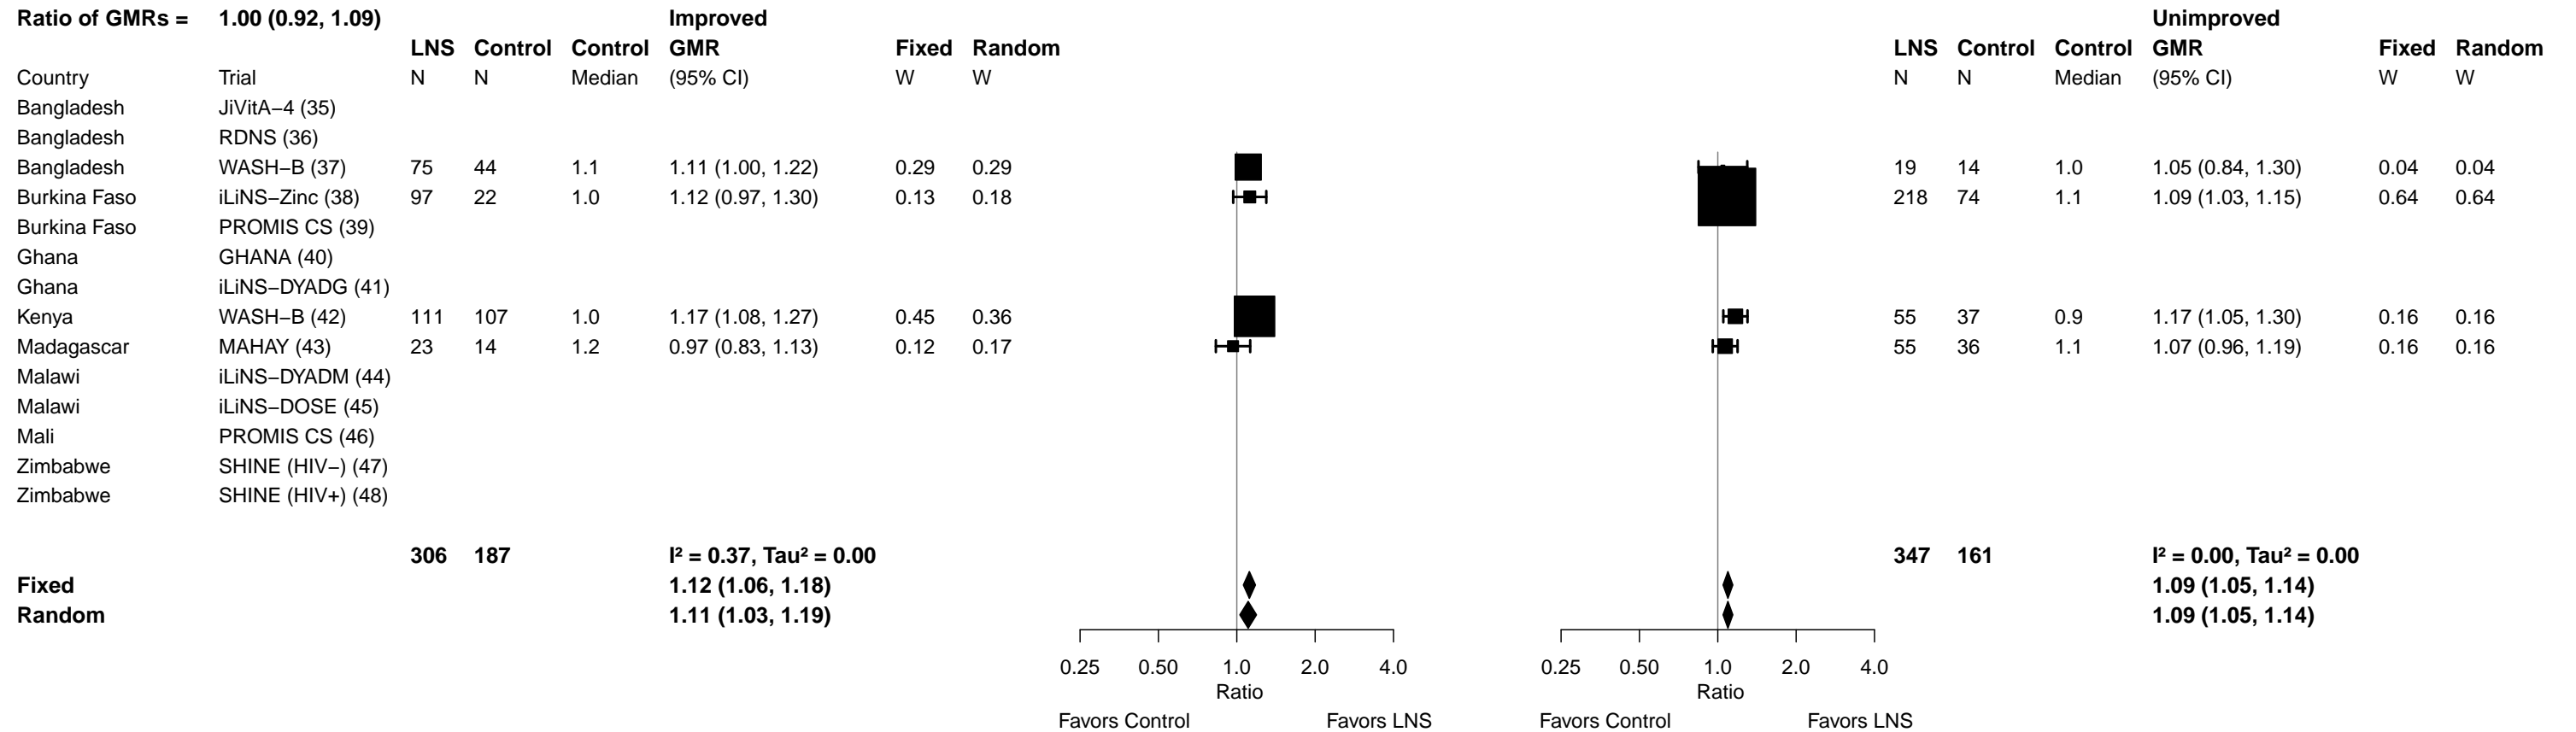

**Supplemental figure 7W: Geometric mean ratio of retinol binding protein concentration**

**7W4: Stratified by Household sanitation (insufficient comparisons)**

Supplemental figure 7W: Geometric mean ratio of retinol binding protein concentration

7W5: Stratified by Season at the time of assessment

**P-for-interaction = 0.101**  
**Ratio of GMRs = 0.96 (0.92, 1.01)**

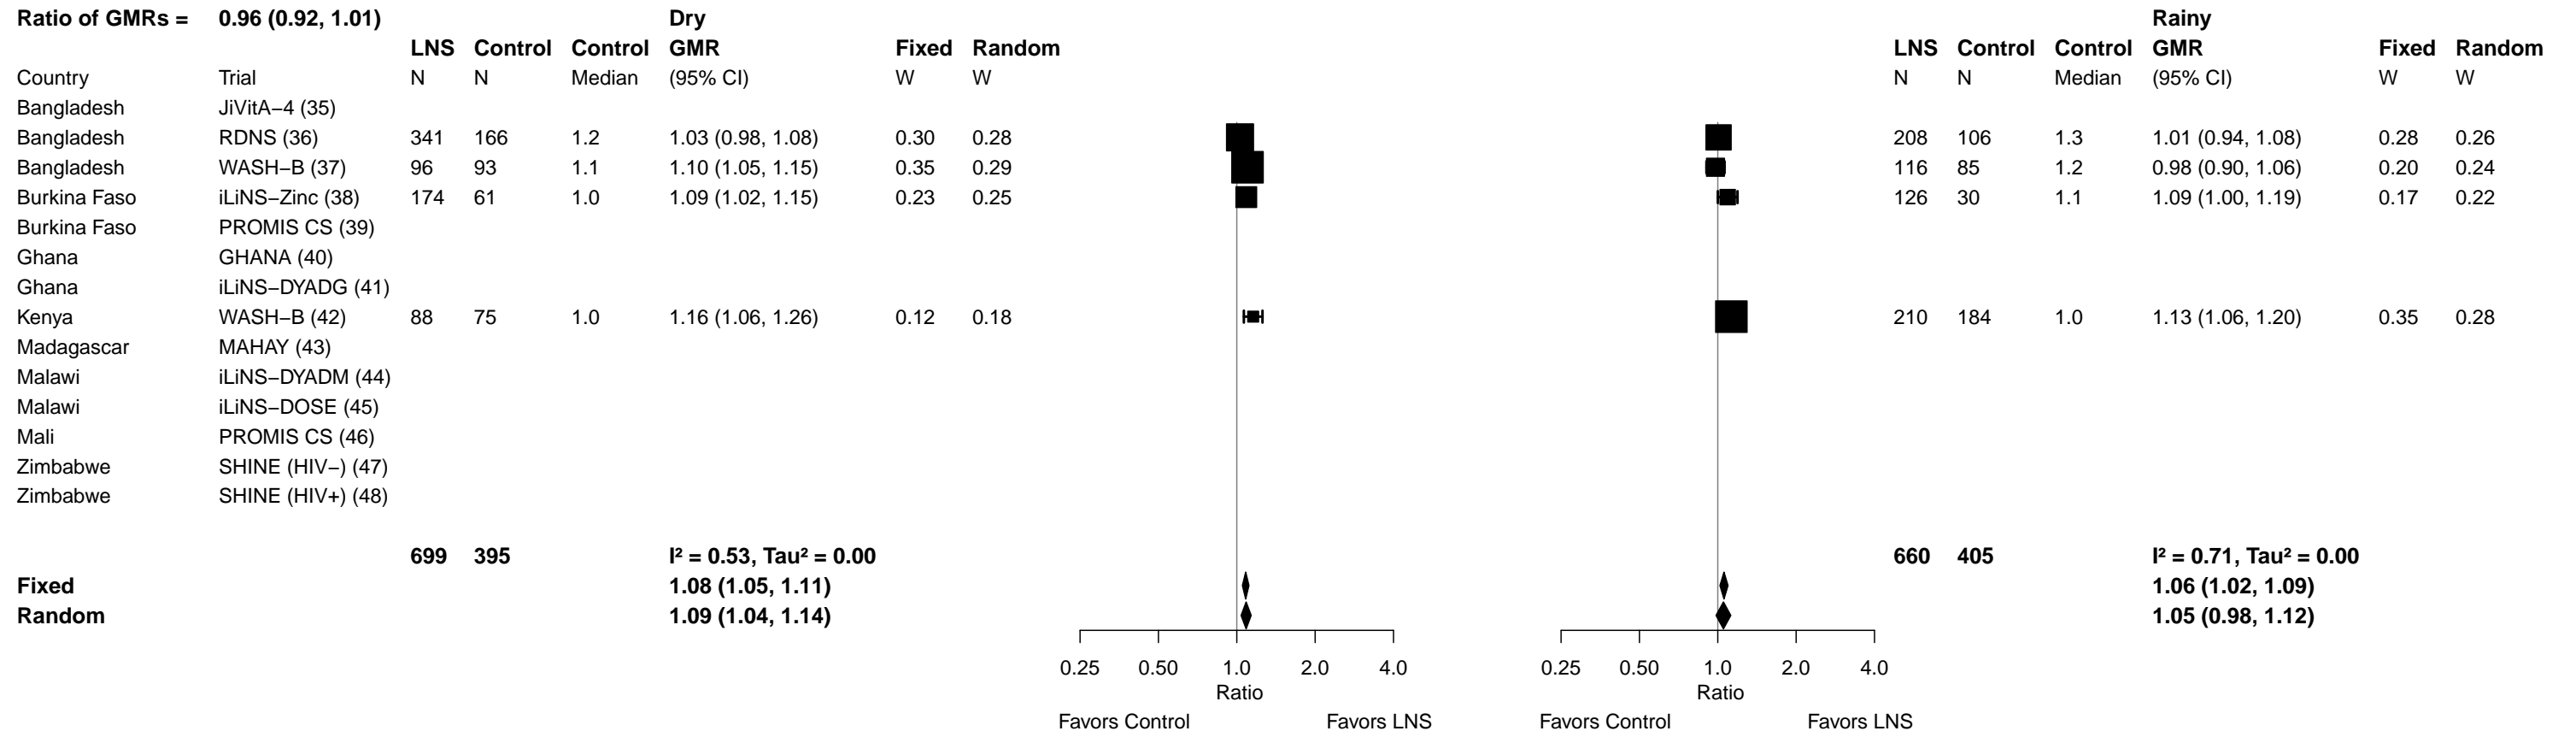

**Supplemental figure 7X: Low vitamin A status (RBP < 0.70 µmol/L) prevalence ratio**

**7X1: Stratified by Household socio-economic status (insufficient comparisons)**



**Supplemental figure 7X: Low vitamin A status (RBP < 0.70  $\mu\text{mol/L}$ ) prevalence ratio**

**7X2: Stratified by Household food insecurity (insufficient comparisons)**

Supplemental figure 7X: Low vitamin A status (RBP < 0.70  $\mu\text{mol/L}$ ) prevalence ratio

7X3: Stratified by Household source water quality (insufficient comparisons)

Supplemental figure 7X: Low vitamin A status (RBP < 0.70  $\mu\text{mol/L}$ ) prevalence ratio

7X4: Stratified by Household sanitation (insufficient comparisons)

Supplemental figure 7X: Low vitamin A status (RBP < 0.70  $\mu\text{mol/L}$ ) prevalence ratio

7X5: Stratified by Season at the time of assessment (insufficient comparisons)

**Supplemental figure 7Y: Low vitamin A status (RBP < 0.70 µmol/L) prevalence difference**

**7Y1: Stratified by Household socio-economic status (insufficient comparisons)**

Supplemental figure 7Y: Low vitamin A status (RBP < 0.70  $\mu\text{mol/L}$ ) prevalence difference

7Y2: Stratified by Household food insecurity (insufficient comparisons)

Supplemental figure 7Y: Low vitamin A status (RBP < 0.70  $\mu\text{mol/L}$ ) prevalence difference

7Y3: Stratified by Household source water quality (insufficient comparisons)

Supplemental figure 7Y: Low vitamin A status (RBP < 0.70  $\mu\text{mol/L}$ ) prevalence difference

7Y4: Stratified by Household sanitation (insufficient comparisons)



Supplemental figure 7Y: Low vitamin A status (RBP < 0.70  $\mu\text{mol/L}$ ) prevalence difference

7Y5: Stratified by Season at the time of assessment (insufficient comparisons)

### Supplemental figure 7Z: Marginal vitamin A status (RBP < 1.05 μmol/L) prevalence ratio

#### 7Z1: Stratified by Household socio-economic status

**P-for-interaction = 0.026**

**Ratio of PRs = 1.26 (1.03, 1.56)**

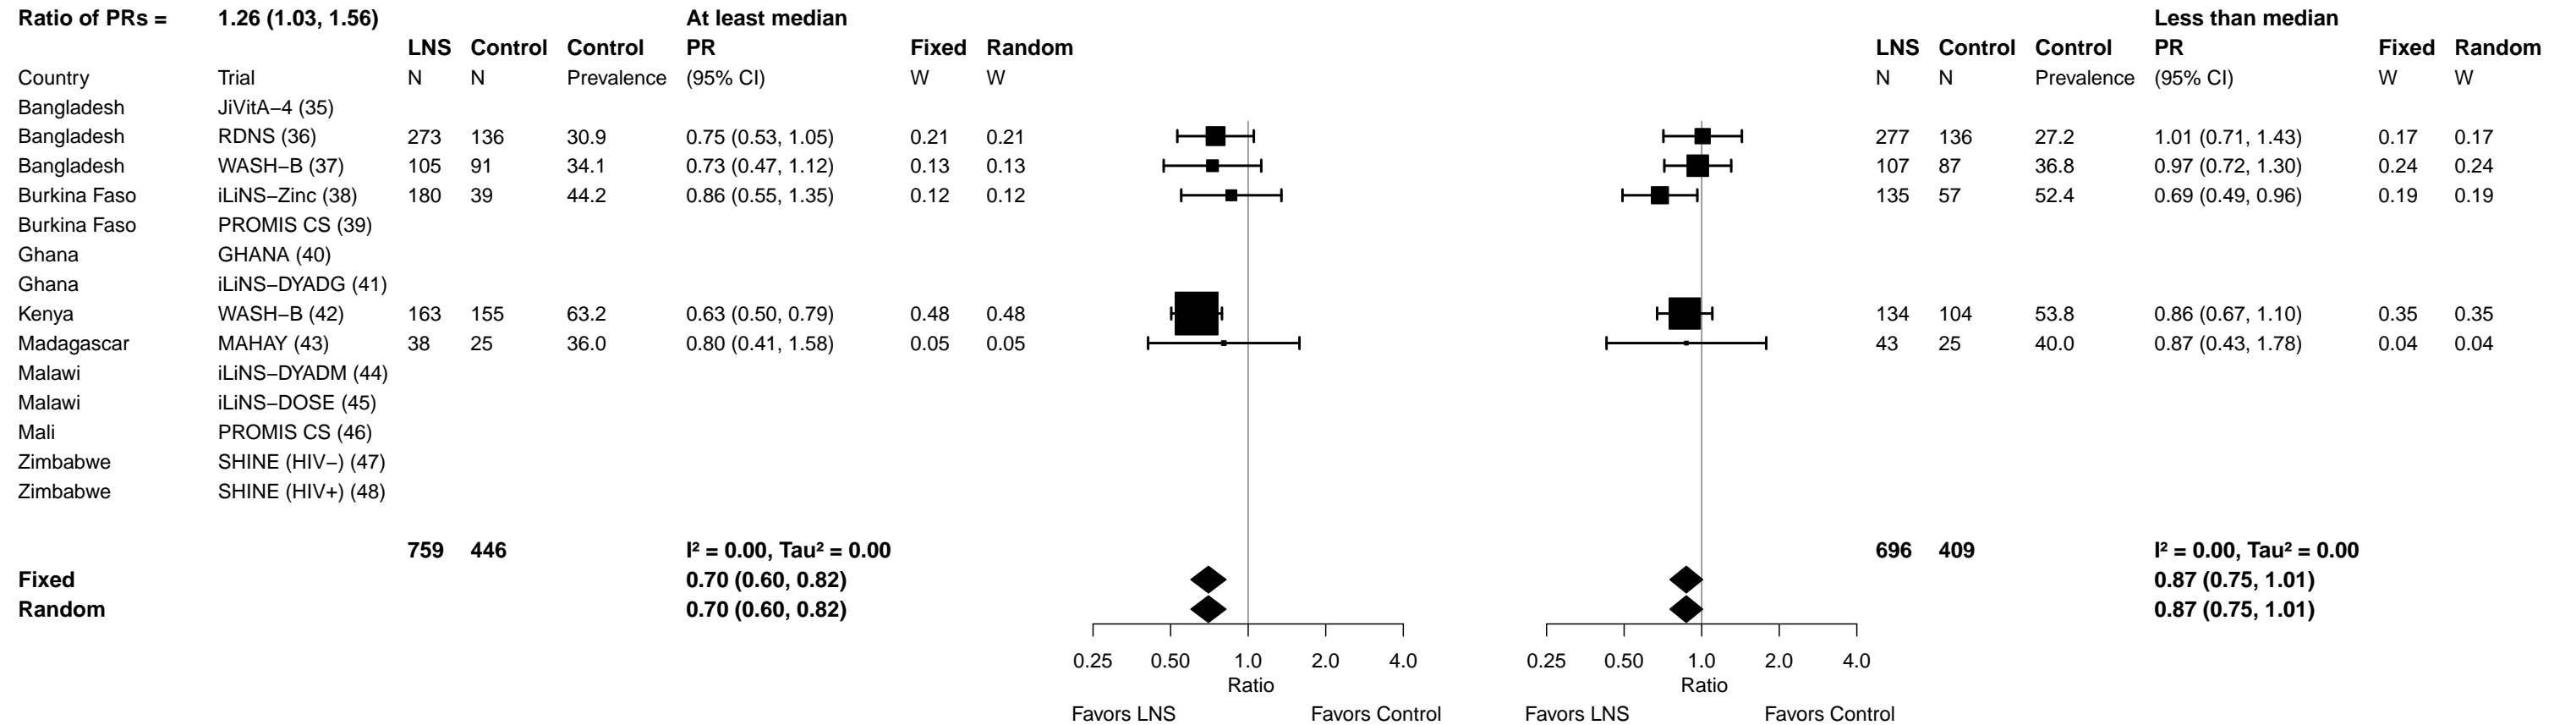

Supplemental figure 7Z: Marginal vitamin A status (RBP < 1.05 µmol/L) prevalence ratio

7Z2: Stratified by Household food insecurity

P-for-interaction = 0.208

Ratio of PRs = 0.85 (0.67, 1.09)

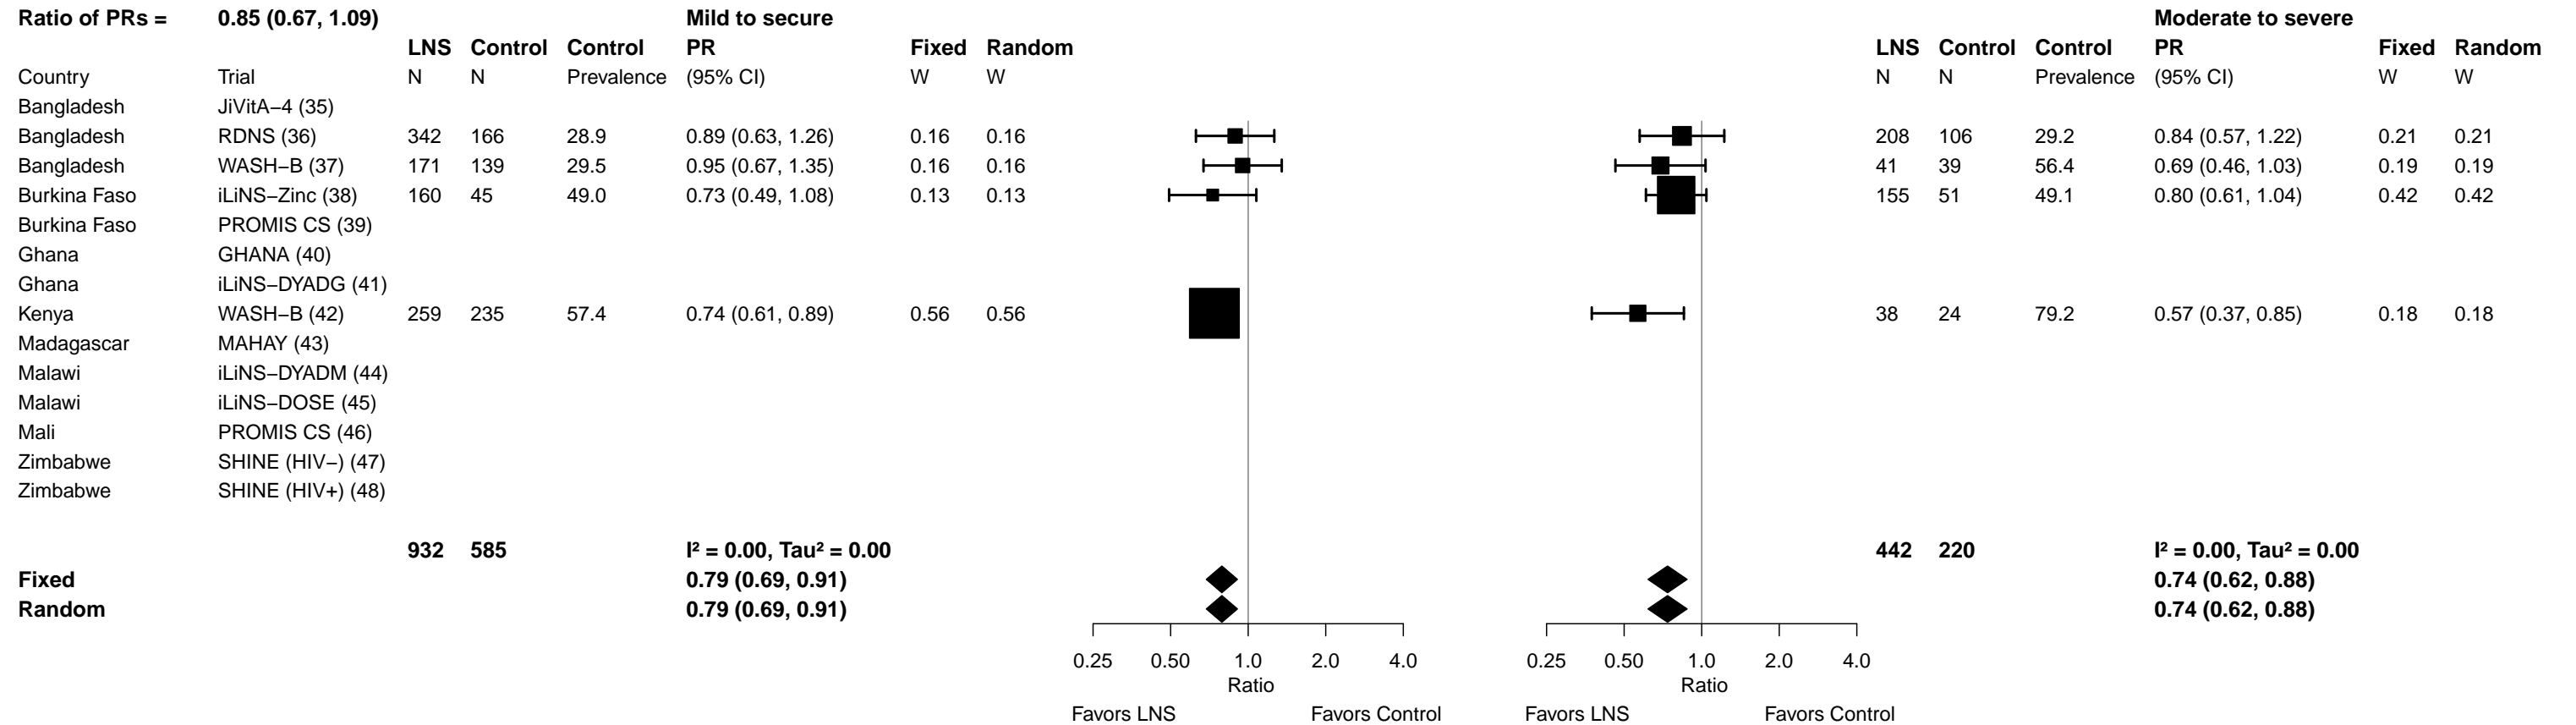

Supplemental figure 7Z: Marginal vitamin A status (RBP < 1.05 µmol/L) prevalence ratio

7Z3: Stratified by Household source water quality

P-for-interaction = 0.520

Ratio of PRs = 1.10 (0.82, 1.48)

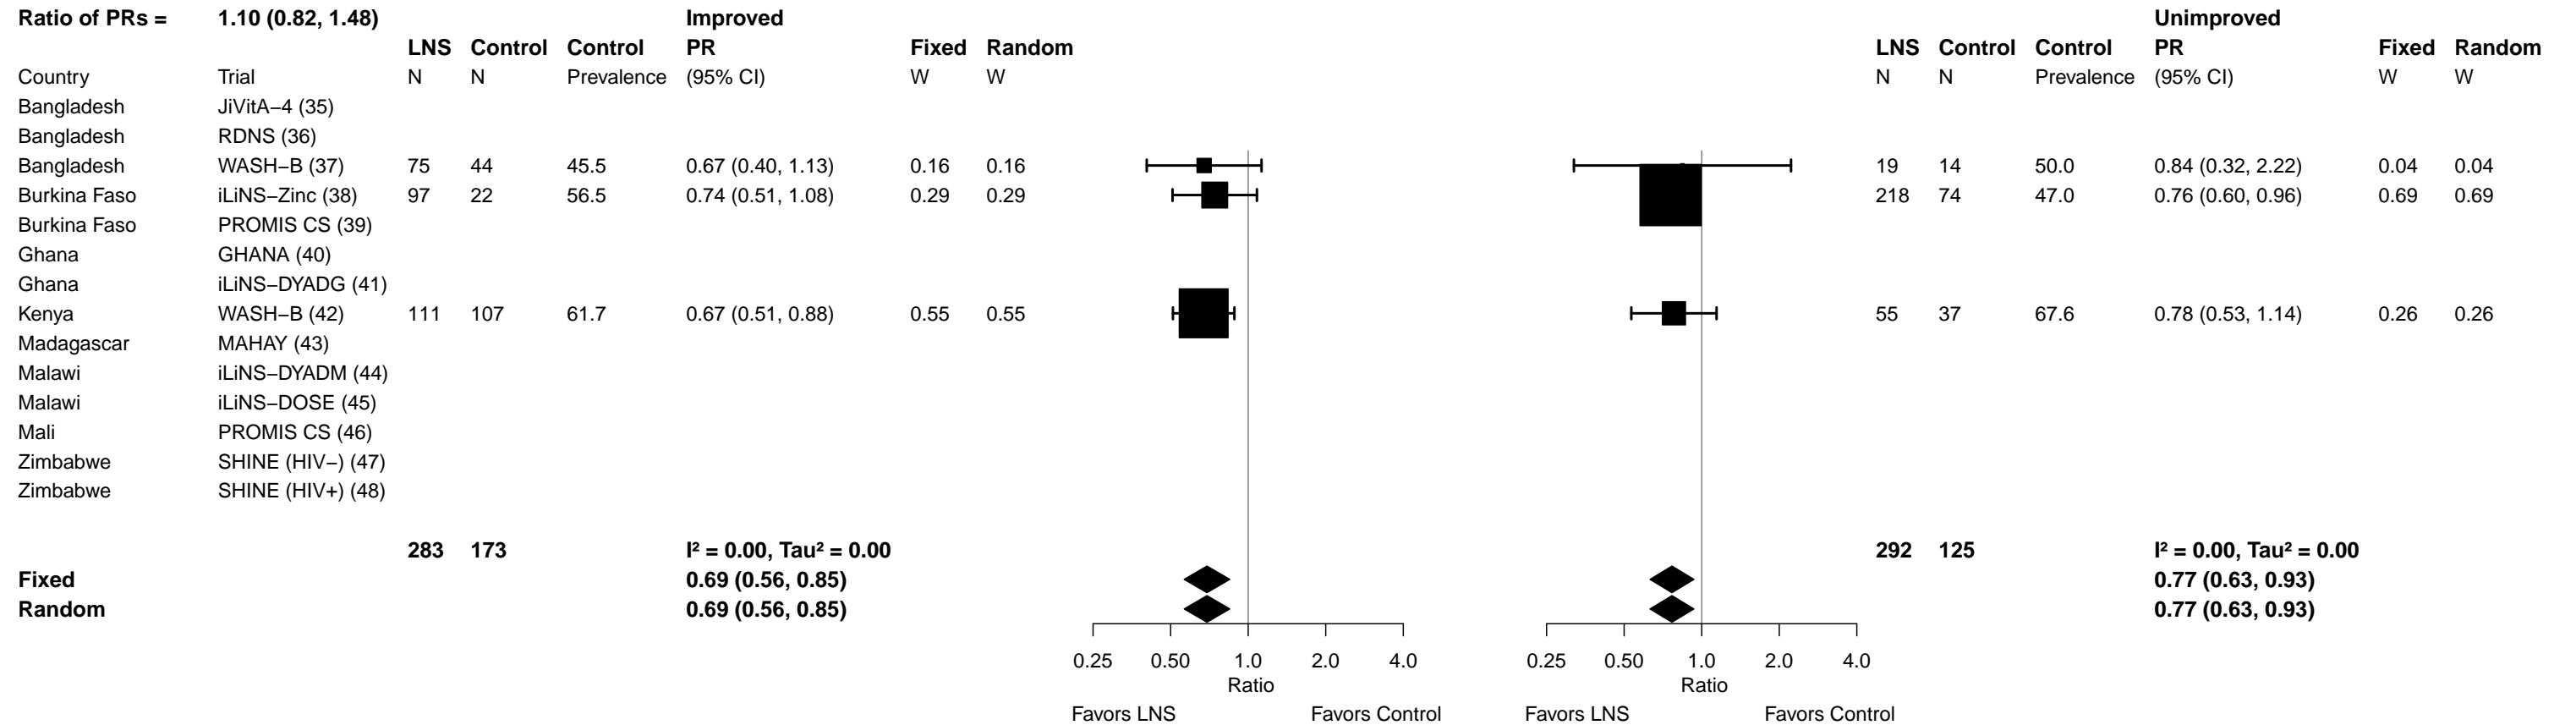

Supplemental figure 7Z: Marginal vitamin A status (RBP < 1.05  $\mu\text{mol/L}$ ) prevalence ratio

7Z4: Stratified by Household sanitation (insufficient comparisons)

Supplemental figure 7Z: Marginal vitamin A status (RBP < 1.05 µmol/L) prevalence ratio

7Z5: Stratified by Season at the time of assessment

P-for-interaction = 0.552

Ratio of PRs = 1.08 (0.84, 1.37)

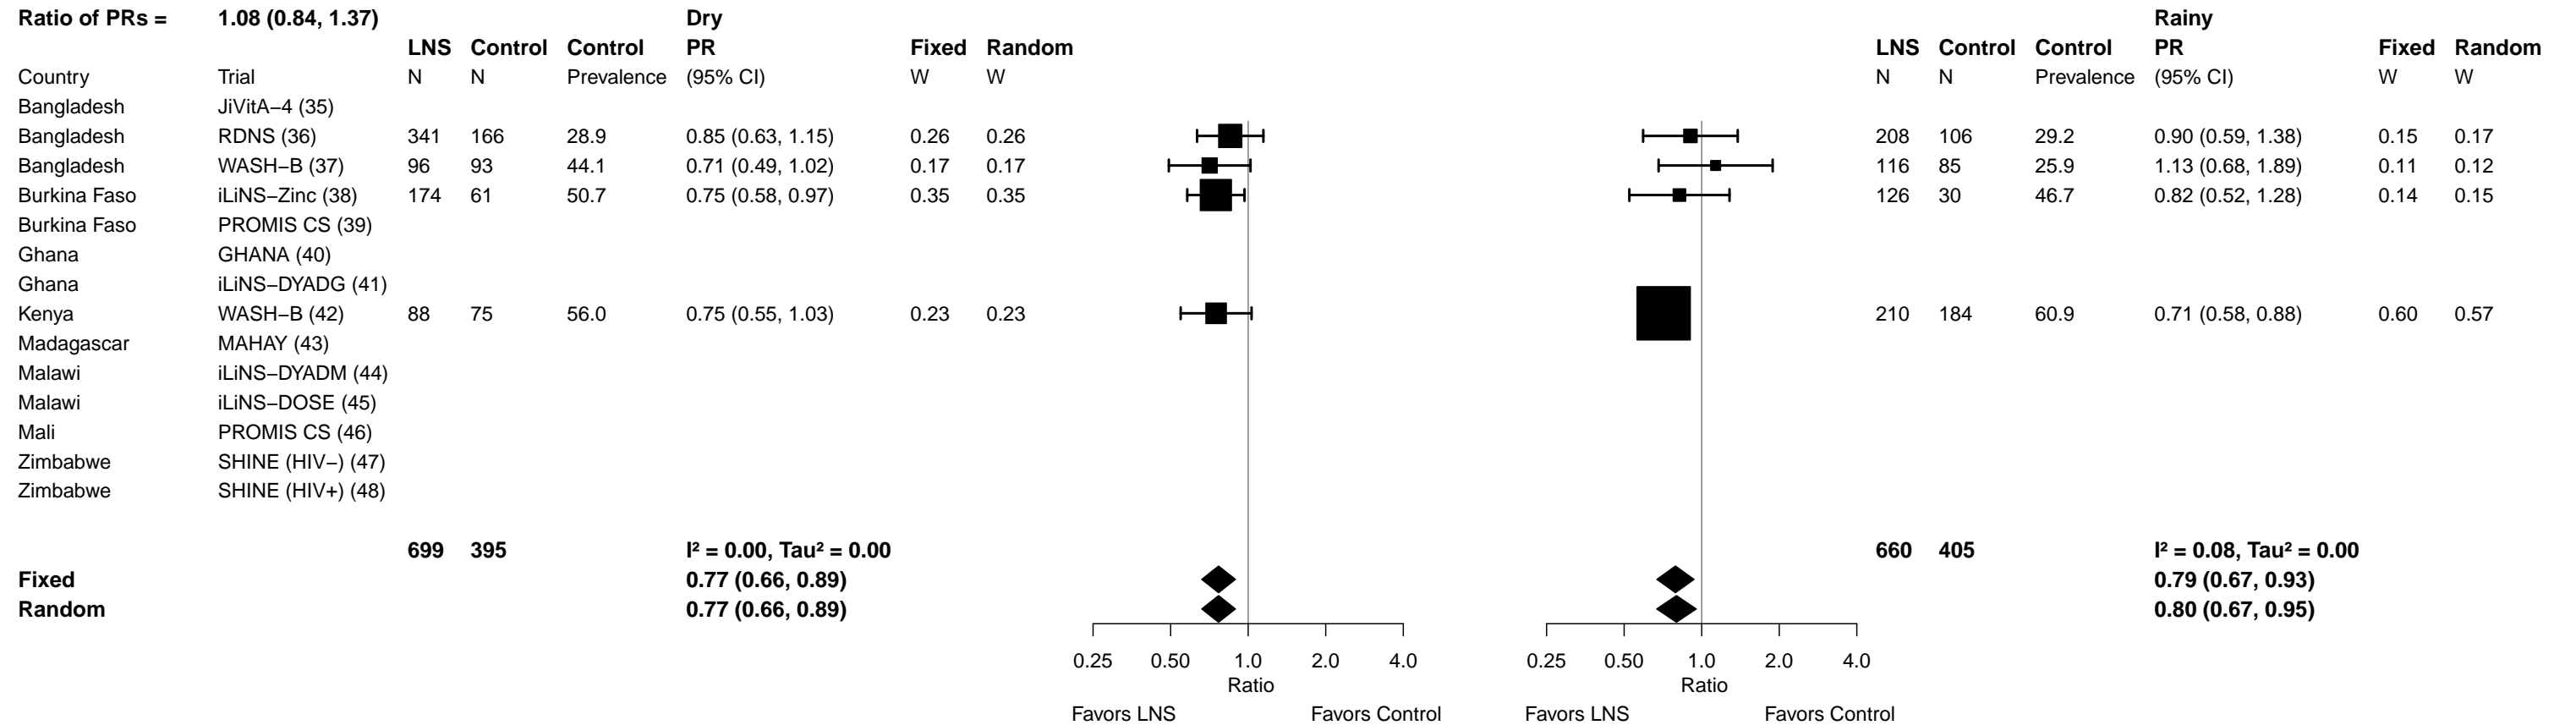

### Supplemental figure 7AA: Marginal vitamin A status (RBP < 1.05 μmol/L) prevalence difference

#### 7AA1: Stratified by Household socio-economic status

**P-for-interaction = 0.076**

**Difference in PDs = 0.07 (-0.01, 0.15)**

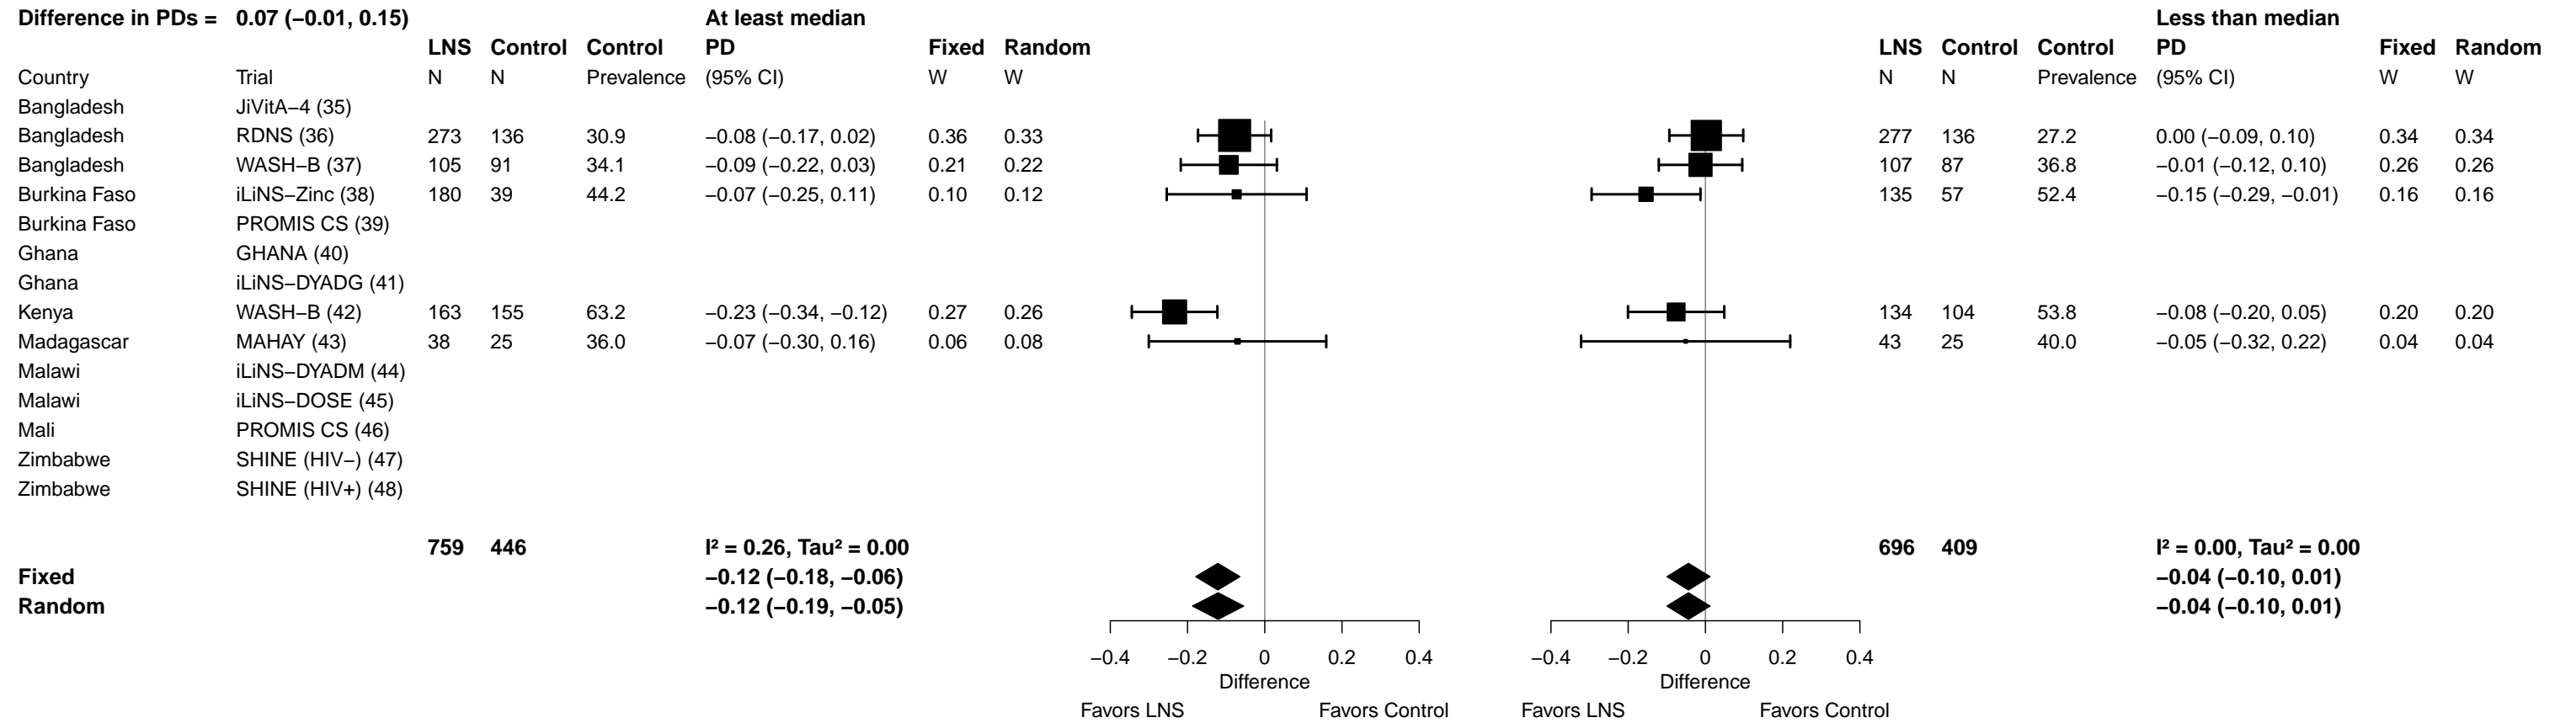

Supplemental figure 7AA: Marginal vitamin A status (RBP < 1.05 µmol/L) prevalence difference

7AA2: Stratified by Household food insecurity

P-for-interaction = 0.231

Difference in PDs = -0.06 (-0.15, 0.04)

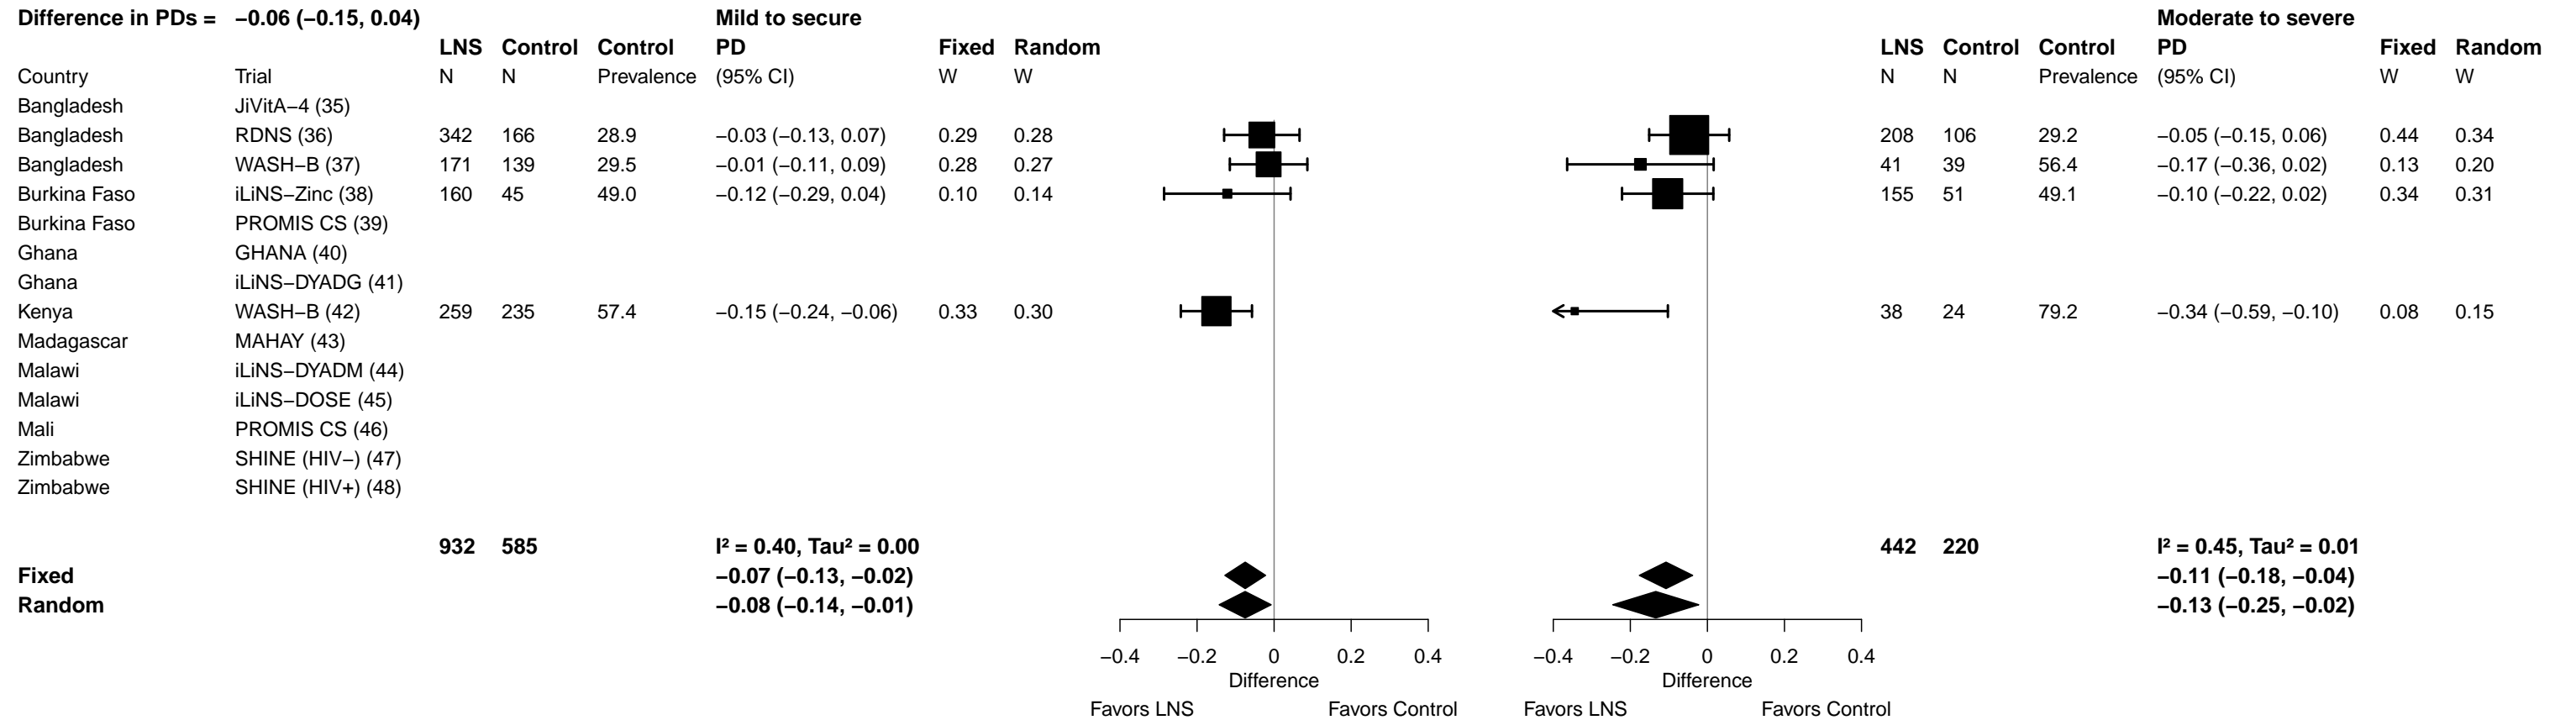



Supplemental figure 7AA: Marginal vitamin A status (RBP < 1.05 µmol/L) prevalence difference

7AA3: Stratified by Household source water quality

P-for-interaction = 0.499

Difference in PDs = 0.05 (-0.10, 0.21)

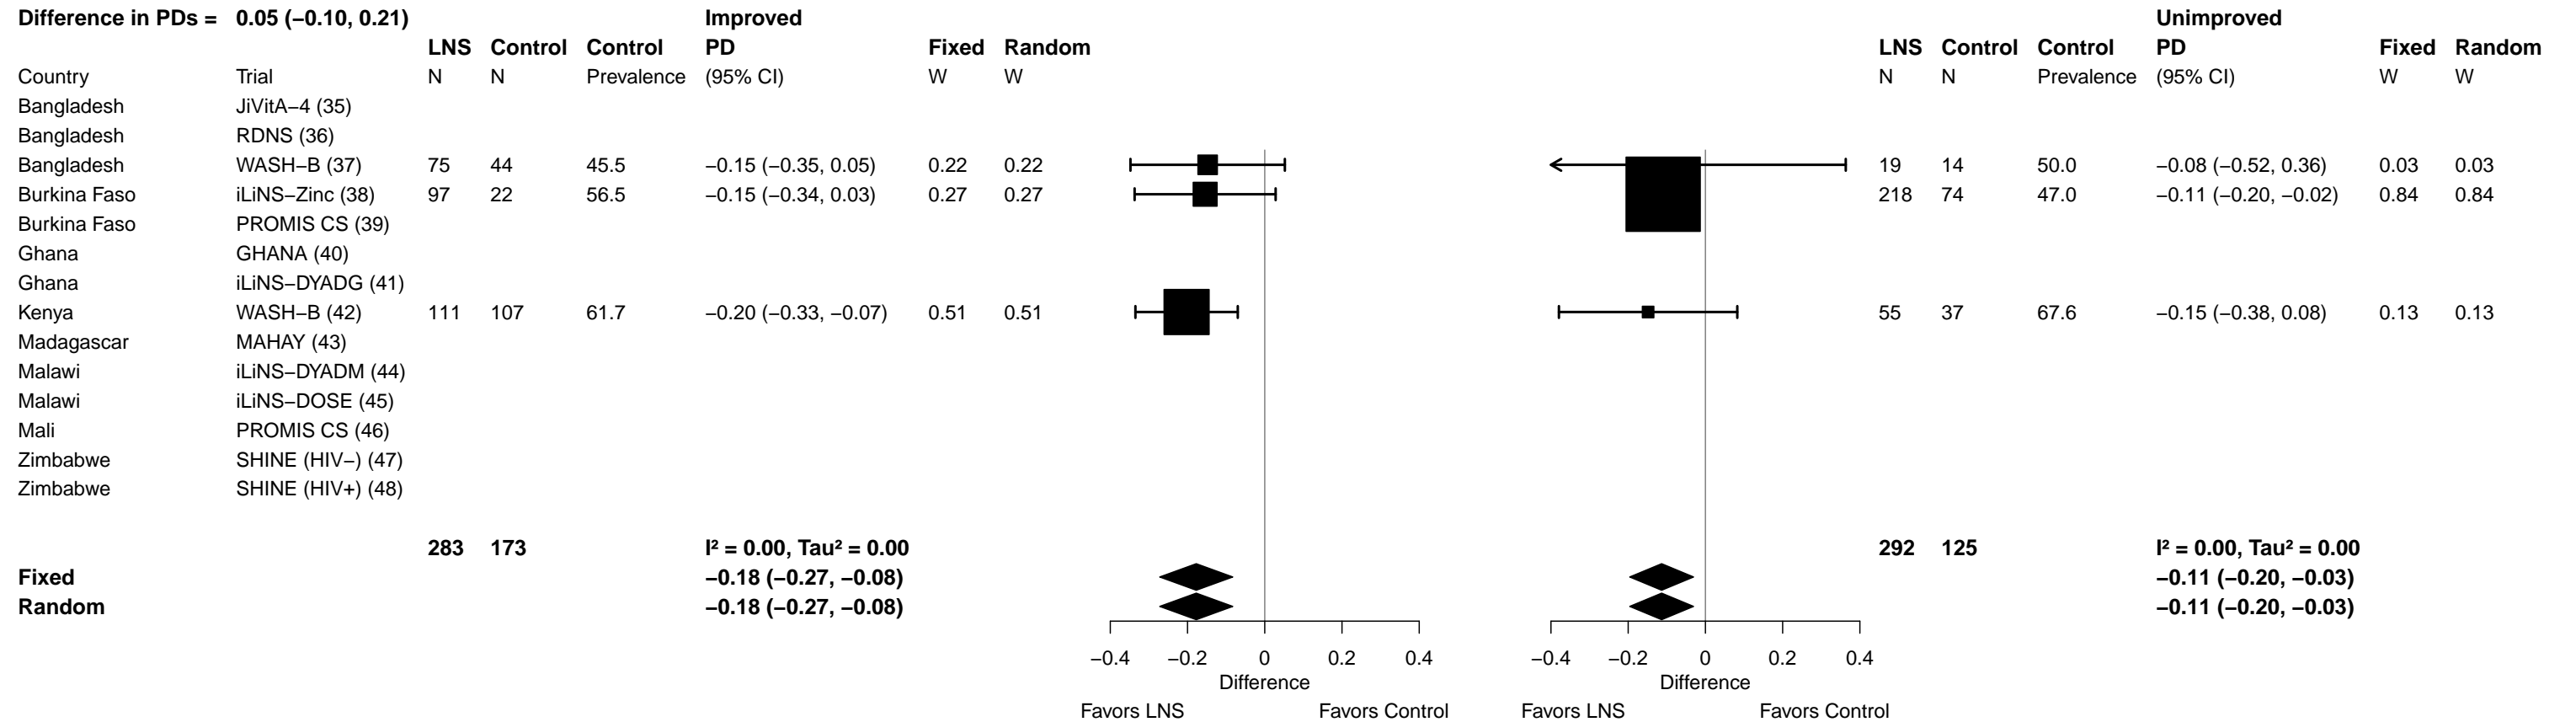

Supplemental figure 7AA: Marginal vitamin A status (RBP < 1.05  $\mu\text{mol/L}$ ) prevalence difference

7AA4: Stratified by Household sanitation (insufficient comparisons)

Supplemental figure 7AA: Marginal vitamin A status (RBP < 1.05 µmol/L) prevalence difference

7AA5: Stratified by Season at the time of assessment

P-for-interaction = 0.397

Difference in PDs = 0.04 (-0.05, 0.12)

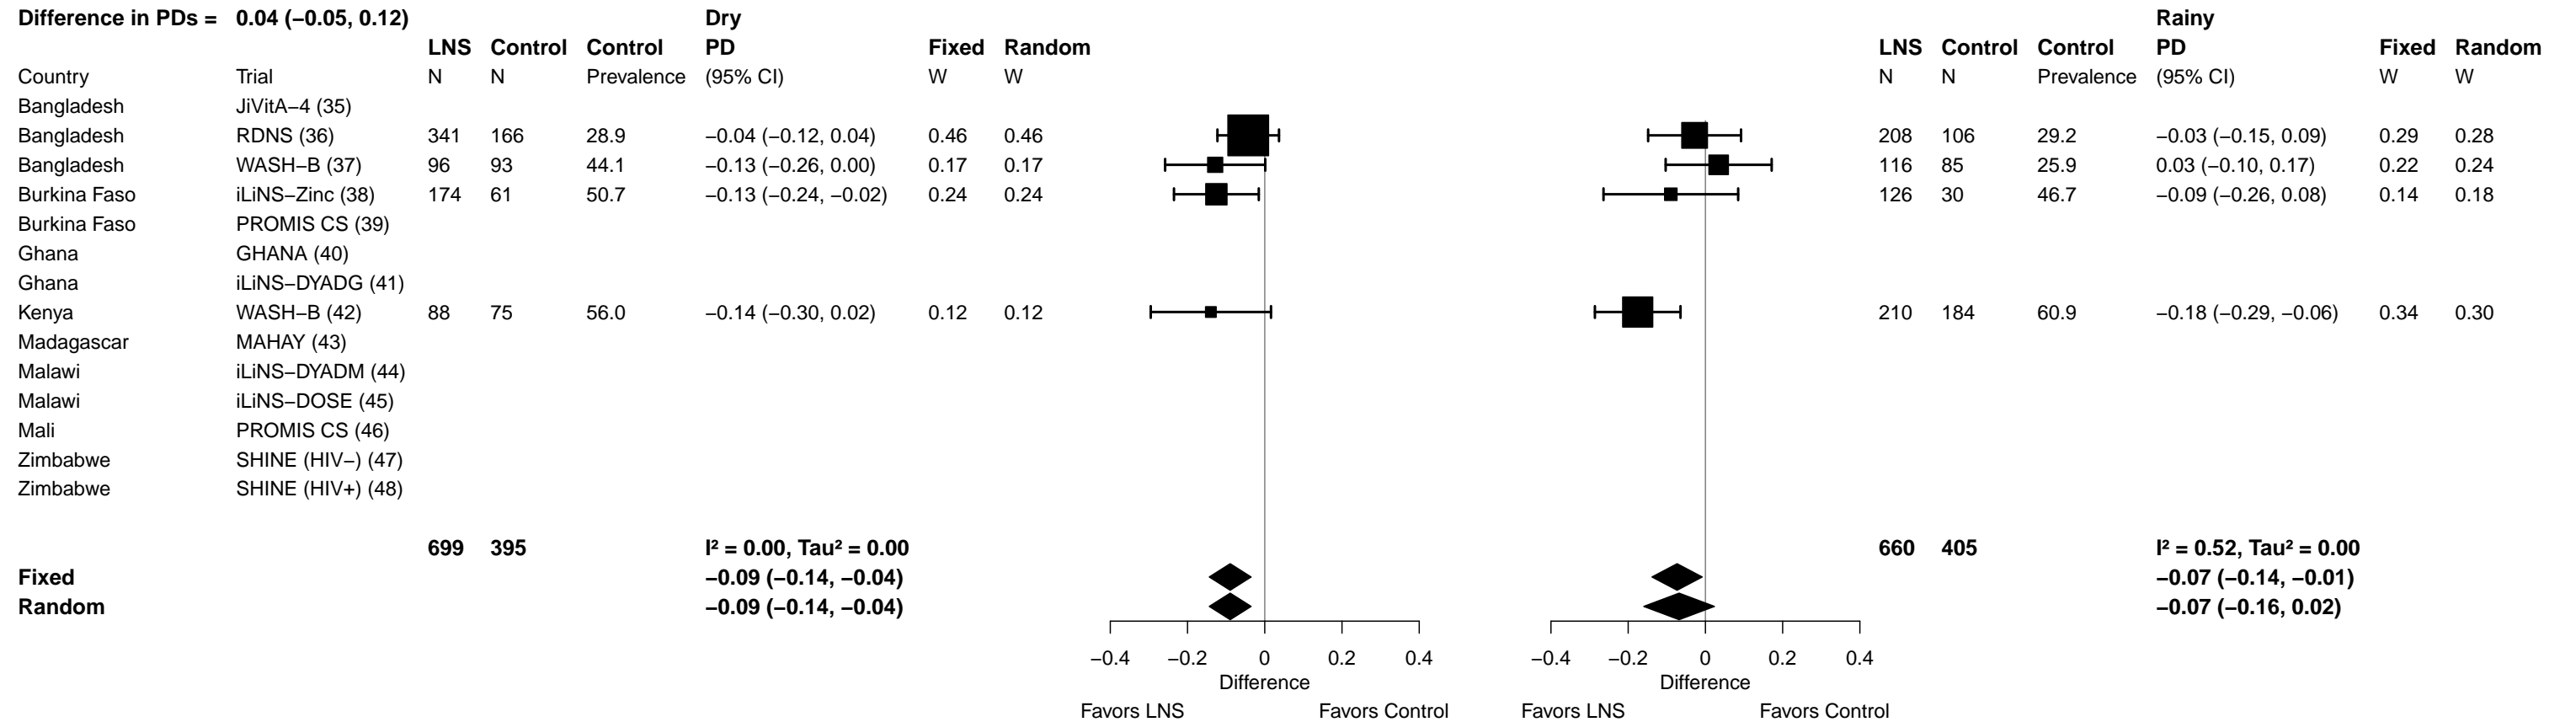

# Supplemental figure 8: Sensitivity analyses of effect modification of SQ-LNS on biochemical outcomes by individual-level effect modifiers

## Contents

|                                                                                                   |           |
|---------------------------------------------------------------------------------------------------|-----------|
| <b>Supplemental figure 8A: Difference in mean differences in hemoglobin concentration</b>         | <b>5</b>  |
| 8A1: By maternal effect modifiers . . . . .                                                       | 5         |
| 8A2: By child effect modifiers . . . . .                                                          | 6         |
| 8A3: By household effect modifiers . . . . .                                                      | 7         |
| <b>Supplemental figure 8B: Ratio of anemia prevalence ratios</b>                                  | <b>8</b>  |
| 8B1: By maternal effect modifiers . . . . .                                                       | 8         |
| 8B2: By child effect modifiers . . . . .                                                          | 9         |
| 8B3: By household effect modifiers . . . . .                                                      | 10        |
| <b>Supplemental figure 8C: Difference in anemia prevalence differences</b>                        | <b>11</b> |
| 8C1: By maternal effect modifiers . . . . .                                                       | 11        |
| 8C2: By child effect modifiers . . . . .                                                          | 12        |
| 8C3: By household effect modifiers . . . . .                                                      | 13        |
| <b>Supplemental figure 8D: Ratio of moderate-to-severe anemia prevalence ratios</b>               | <b>14</b> |
| 8D1: By maternal effect modifiers . . . . .                                                       | 14        |
| 8D2: By child effect modifiers . . . . .                                                          | 15        |
| 8D3: By household effect modifiers . . . . .                                                      | 16        |
| <b>Supplemental figure 8E: Difference in moderate-to-severe anemia prevalence differences</b>     | <b>17</b> |
| 8E1: By maternal effect modifiers . . . . .                                                       | 17        |
| 8E2: By child effect modifiers . . . . .                                                          | 18        |
| 8E3: By household effect modifiers . . . . .                                                      | 19        |
| <b>Supplemental figure 8F: Ratio of geometric mean ratios of ferritin concentration</b>           | <b>20</b> |
| 8F1: By maternal effect modifiers . . . . .                                                       | 20        |
| 8F2: By child effect modifiers . . . . .                                                          | 21        |
| 8F3: By household effect modifiers . . . . .                                                      | 22        |
| <b>Supplemental figure 8G: Ratio of iron deficiency (ferritin &lt; 12 µg/L) prevalence ratios</b> | <b>23</b> |

|                                                                                                             |           |
|-------------------------------------------------------------------------------------------------------------|-----------|
| 8G1: By maternal effect modifiers . . . . .                                                                 | 23        |
| 8G2: By child effect modifiers . . . . .                                                                    | 24        |
| 8G3: By household effect modifiers . . . . .                                                                | 25        |
| <b>Supplemental figure 8H: Difference in iron deficiency (ferritin &lt; 12 µg/L) prevalence differences</b> | <b>26</b> |
| 8H1: By maternal effect modifiers . . . . .                                                                 | 26        |
| 8H2: By child effect modifiers . . . . .                                                                    | 27        |
| 8H3: By household effect modifiers . . . . .                                                                | 28        |
| <b>Supplemental figure 8I: Ratio of iron deficiency anemia prevalence ratios</b>                            | <b>29</b> |
| 8I1: By maternal effect modifiers . . . . .                                                                 | 29        |
| 8I2: By child effect modifiers . . . . .                                                                    | 30        |
| 8I3: By household effect modifiers . . . . .                                                                | 31        |
| <b>Supplemental figure 8J: Difference in iron deficiency anemia prevalence differences</b>                  | <b>32</b> |
| 8J1: By maternal effect modifiers . . . . .                                                                 | 32        |
| 8J2: By child effect modifiers . . . . .                                                                    | 33        |
| 8J3: By household effect modifiers . . . . .                                                                | 34        |
| <b>Supplemental figure 8K: Ratio of geometric mean ratios of soluble transferrin receptor concentration</b> | <b>35</b> |
| 8K1: By maternal effect modifiers . . . . .                                                                 | 35        |
| 8K2: By child effect modifiers . . . . .                                                                    | 36        |
| 8K3: By household effect modifiers . . . . .                                                                | 37        |
| <b>Supplemental figure 8L: Ratio of elevated soluble transferrin receptor prevalence ratios</b>             | <b>38</b> |
| 8L1: By maternal effect modifiers . . . . .                                                                 | 38        |
| 8L2: By child effect modifiers . . . . .                                                                    | 39        |
| 8L3: By household effect modifiers . . . . .                                                                | 40        |
| <b>Supplemental figure 8M: Difference in elevated soluble transferrin receptor prevalence differences</b>   | <b>41</b> |
| 8M1: By maternal effect modifiers . . . . .                                                                 | 41        |
| 8M2: By child effect modifiers . . . . .                                                                    | 42        |
| 8M3: By household effect modifiers . . . . .                                                                | 43        |
| <b>Supplemental figure 8N: Ratio of geometric mean ratios of zinc protoporphyrin concentration</b>          | <b>44</b> |
| 8N1: By maternal effect modifiers . . . . .                                                                 | 44        |
| 8N2: By child effect modifiers . . . . .                                                                    | 45        |
| 8N3: By household effect modifiers . . . . .                                                                | 46        |
| <b>Supplemental figure 8O: Ratio of elevated zinc protoporphyrin prevalence ratios</b>                      | <b>47</b> |
| 8O1: By maternal effect modifiers . . . . .                                                                 | 47        |
| 8O2: By child effect modifiers . . . . .                                                                    | 48        |
| 8O3: By household effect modifiers . . . . .                                                                | 49        |

|                                                                                                                                         |           |
|-----------------------------------------------------------------------------------------------------------------------------------------|-----------|
| <b>Supplemental figure 8P: Difference in elevated zinc protoporphyrin prevalence differences</b>                                        | <b>50</b> |
| 8P1: By maternal effect modifiers . . . . .                                                                                             | 50        |
| 8P2: By child effect modifiers . . . . .                                                                                                | 51        |
| 8P3: By household effect modifiers . . . . .                                                                                            | 52        |
| <b>Supplemental figure 8Q: Ratio of geometric mean ratios of plasma zinc concentration</b>                                              | <b>53</b> |
| 8Q1: By maternal effect modifiers . . . . .                                                                                             | 53        |
| 8Q2: By child effect modifiers . . . . .                                                                                                | 54        |
| 8Q3: By household effect modifiers . . . . .                                                                                            | 55        |
| <b>Supplemental figure 8R: Ratio of geometric mean ratios of retinol concentration</b>                                                  | <b>56</b> |
| 8R1: By maternal effect modifiers . . . . .                                                                                             | 56        |
| 8R2: By child effect modifiers . . . . .                                                                                                | 57        |
| 8R3: By household effect modifiers . . . . .                                                                                            | 58        |
| <b>Supplemental figure 8S: Ratio of low vitamin A (retinol &lt; 0.70 <math>\mu\text{mol/L}</math>) prevalence ratios</b>                | <b>59</b> |
| 8S1: By maternal effect modifiers (insufficient comparisons) . . . . .                                                                  | 59        |
| 8S2: By child effect modifiers (insufficient comparisons) . . . . .                                                                     | 60        |
| 8S3: By household effect modifiers (insufficient comparisons) . . . . .                                                                 | 61        |
| <b>Supplemental figure 8T: Difference in low vitamin A (retinol &lt; 0.70 <math>\mu\text{mol/L}</math>) prevalence differences</b>      | <b>62</b> |
| 8T1: By maternal effect modifiers (insufficient comparisons) . . . . .                                                                  | 62        |
| 8T2: By child effect modifiers (insufficient comparisons) . . . . .                                                                     | 63        |
| 8T3: By household effect modifiers (insufficient comparisons) . . . . .                                                                 | 64        |
| <b>Supplemental figure 8U: Ratio of marginal vitamin A (retinol &lt; 1.05 <math>\mu\text{mol/L}</math>) prevalence ratios</b>           | <b>65</b> |
| 8U1: By maternal effect modifiers . . . . .                                                                                             | 65        |
| 8U2: By child effect modifiers . . . . .                                                                                                | 66        |
| 8U3: By household effect modifiers . . . . .                                                                                            | 67        |
| <b>Supplemental figure 8V: Difference in marginal vitamin A (retinol &lt; 1.05 <math>\mu\text{mol/L}</math>) prevalence differences</b> | <b>68</b> |
| 8V1: By maternal effect modifiers . . . . .                                                                                             | 68        |
| 8V2: By child effect modifiers . . . . .                                                                                                | 69        |
| 8V3: By household effect modifiers . . . . .                                                                                            | 70        |
| <b>Supplemental figure 8W: Ratio of geometric mean ratio of retinol binding protein concentrations</b>                                  | <b>71</b> |
| 8W1: By maternal effect modifiers . . . . .                                                                                             | 71        |
| 8W2: By child effect modifiers . . . . .                                                                                                | 72        |
| 8W3: By household effect modifiers . . . . .                                                                                            | 73        |
| <b>Supplemental figure 8X: Ratio of Low vitamin A status (RBP &lt; 0.70 <math>\mu\text{mol/L}</math>) prevalence ratios</b>             | <b>74</b> |
| 8X1: By maternal effect modifiers (insufficient comparisons) . . . . .                                                                  | 74        |
| 8X2: By child effect modifiers (insufficient comparisons) . . . . .                                                                     | 75        |

|                                                                                                                       |           |
|-----------------------------------------------------------------------------------------------------------------------|-----------|
| 8X3: By household effect modifiers (insufficient comparisons) . . . . .                                               | 76        |
| <b>Supplemental figure 8Y: Difference in low vitamin A status (RBP &lt; 0.70 µmol/L) prevalence differences</b>       | <b>77</b> |
| 8Y1: By maternal effect modifiers (insufficient comparisons) . . . . .                                                | 77        |
| 8Y2: By child effect modifiers (insufficient comparisons) . . . . .                                                   | 78        |
| 8Y3: By household effect modifiers (insufficient comparisons) . . . . .                                               | 79        |
| <b>Supplemental figure 8Z: Ratio of marginal vitamin A status (RBP &lt; 1.05 µmol/L) prevalence ratios</b>            | <b>80</b> |
| 8Z1: By maternal effect modifiers . . . . .                                                                           | 80        |
| 8Z2: By child effect modifiers . . . . .                                                                              | 81        |
| 8Z3: By household effect modifiers . . . . .                                                                          | 82        |
| <b>Supplemental figure 8AA: Difference in marginal vitamin A status (RBP &lt; 1.05 µmol/L) prevalence differences</b> | <b>83</b> |
| 8AA1: By maternal effect modifiers . . . . .                                                                          | 83        |
| 8AA2: By child effect modifiers . . . . .                                                                             | 84        |
| 8AA3: By household effect modifiers . . . . .                                                                         | 85        |

These figures show the pooled estimates of effect modification by different sensitivity analyses. For continuous outcomes, the intervention effect is measured by the difference in mean of the LNS group minus control. For log transformed continuous outcomes, the intervention effect is measured by the ratio of geometric means, the effect estimate is the geometric mean in the LNS group divided by the geometric mean in the control group. For dichotomous outcomes analyzed via prevalence ratios, the effect estimate is the prevalence in the LNS group divided by the prevalence in the control group. For dichotomous outcomes analyzed via prevalence differences, the effect estimate is the prevalence in the LNS group minus the prevalence in the control group. The labels on the left y-axis indicate which outcome is assessed. The different columns correspond to sensitivity analyses in which intervention group categorization differs. All-trial analysis includes all trials; Child-LNS-only excludes trial arms that provided both maternal and child LNS; Multi-component analysis separates comparisons within trials that included multi-component interventions, so that the SQ-LNS vs. no SQ-LNS comparisons were conducted separately between pairs of arms that included the same non-nutrition components (e.g. SQ-LNS+WASH vs. WASH; SQ-LNS vs. Control); Passive arms excluded analysis excludes passive control arms. Depending on the sensitivity analysis, there may not have been enough comparisons available to generate a pooled estimate.

sTfR, soluble transferrin receptor; ZPP, zinc protoporphyrin; RBP, retinol binding protein.

# Supplemental figure 8A: Difference in mean differences in hemoglobin concentration

8A1: By maternal effect modifiers

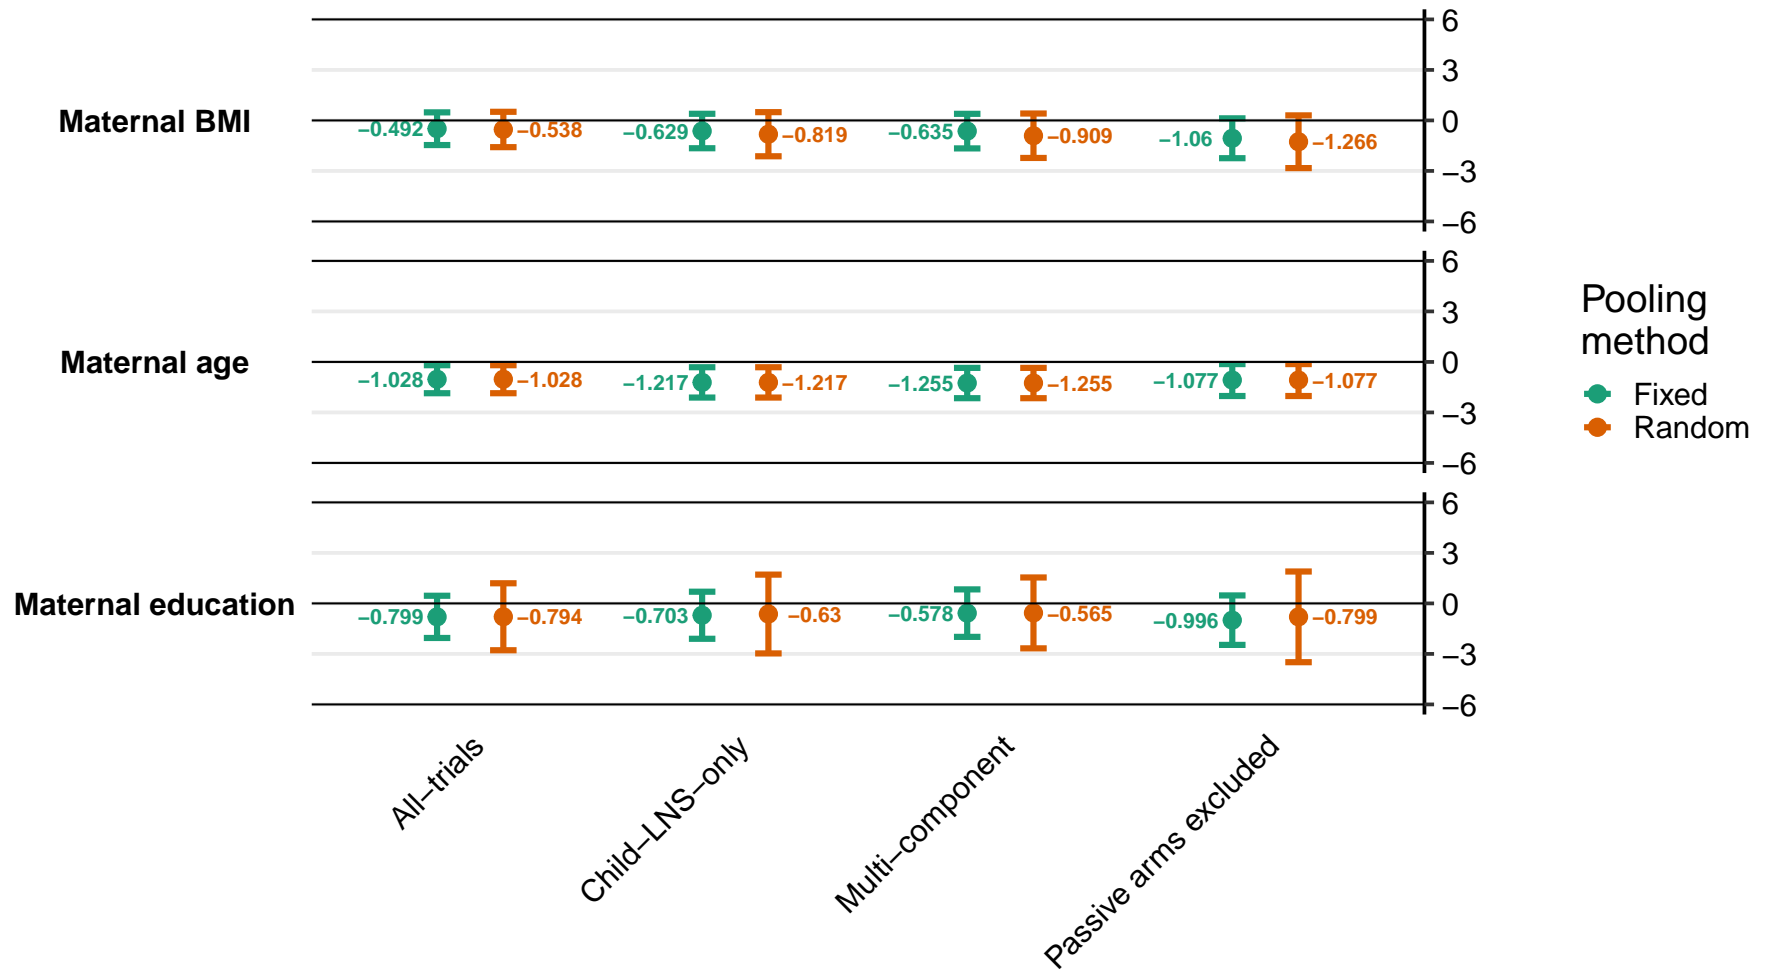



Supplemental figure 8A: Difference in mean differences in hemoglobin concentration

8A2: By child effect modifiers

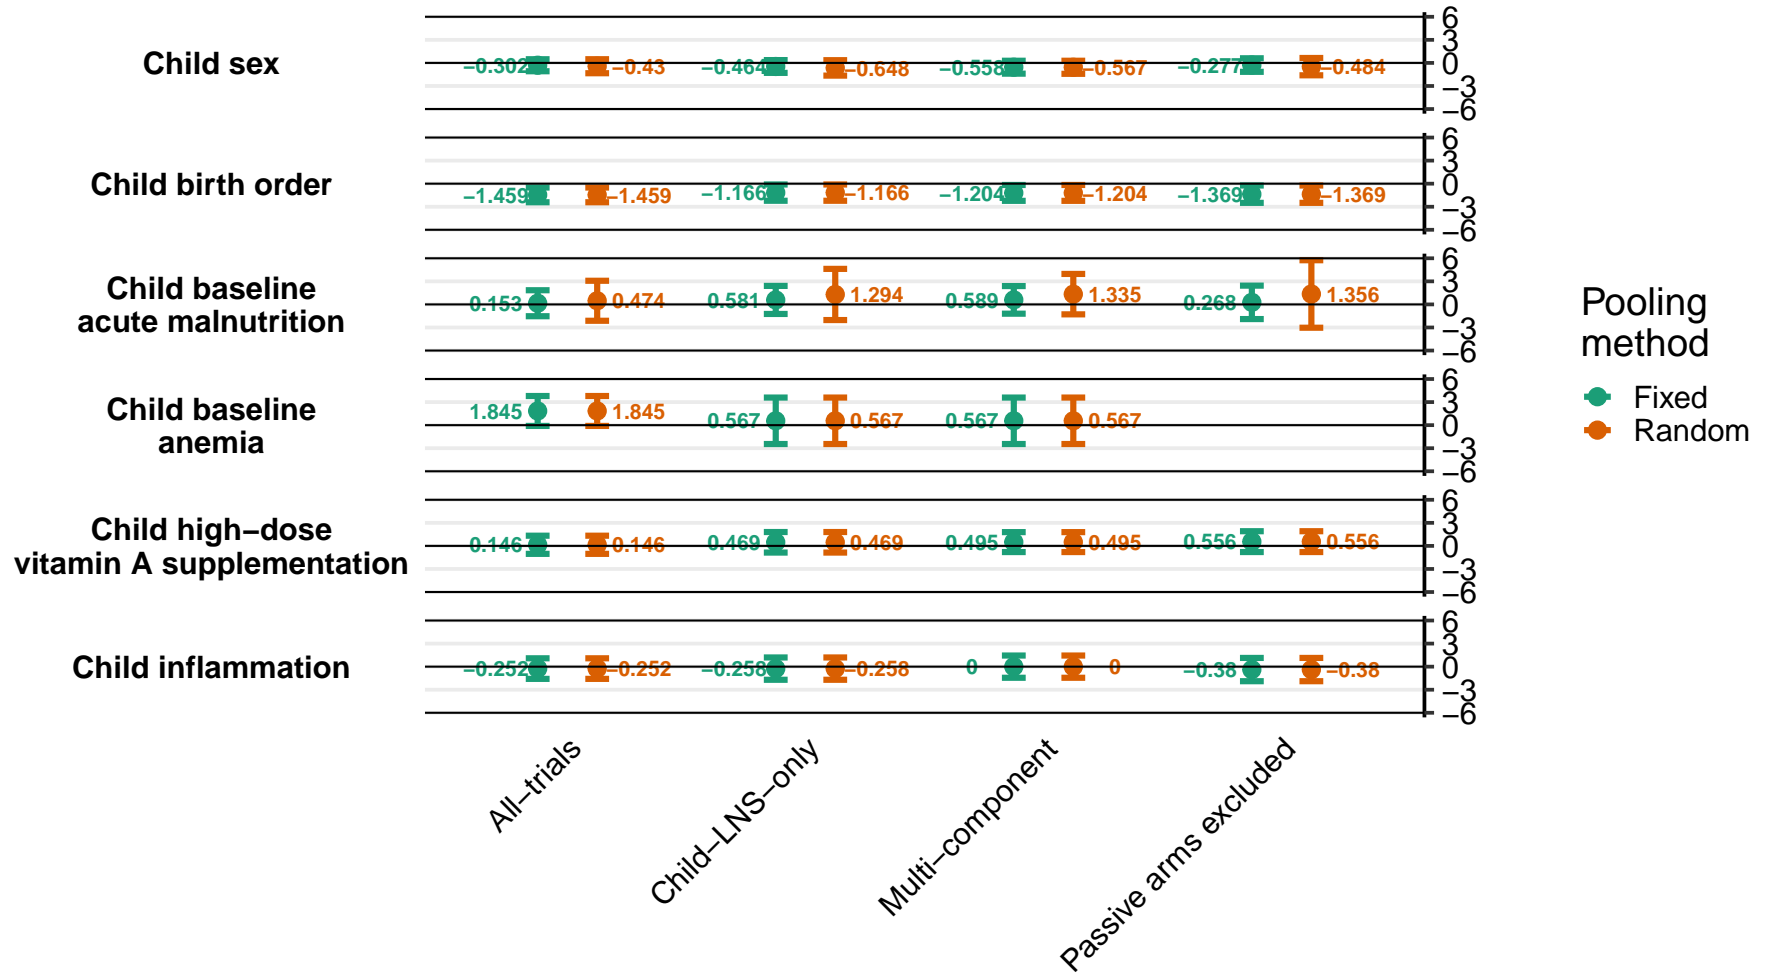

Supplemental figure 8A: Difference in mean differences in hemoglobin concentration

8A3: By household effect modifiers

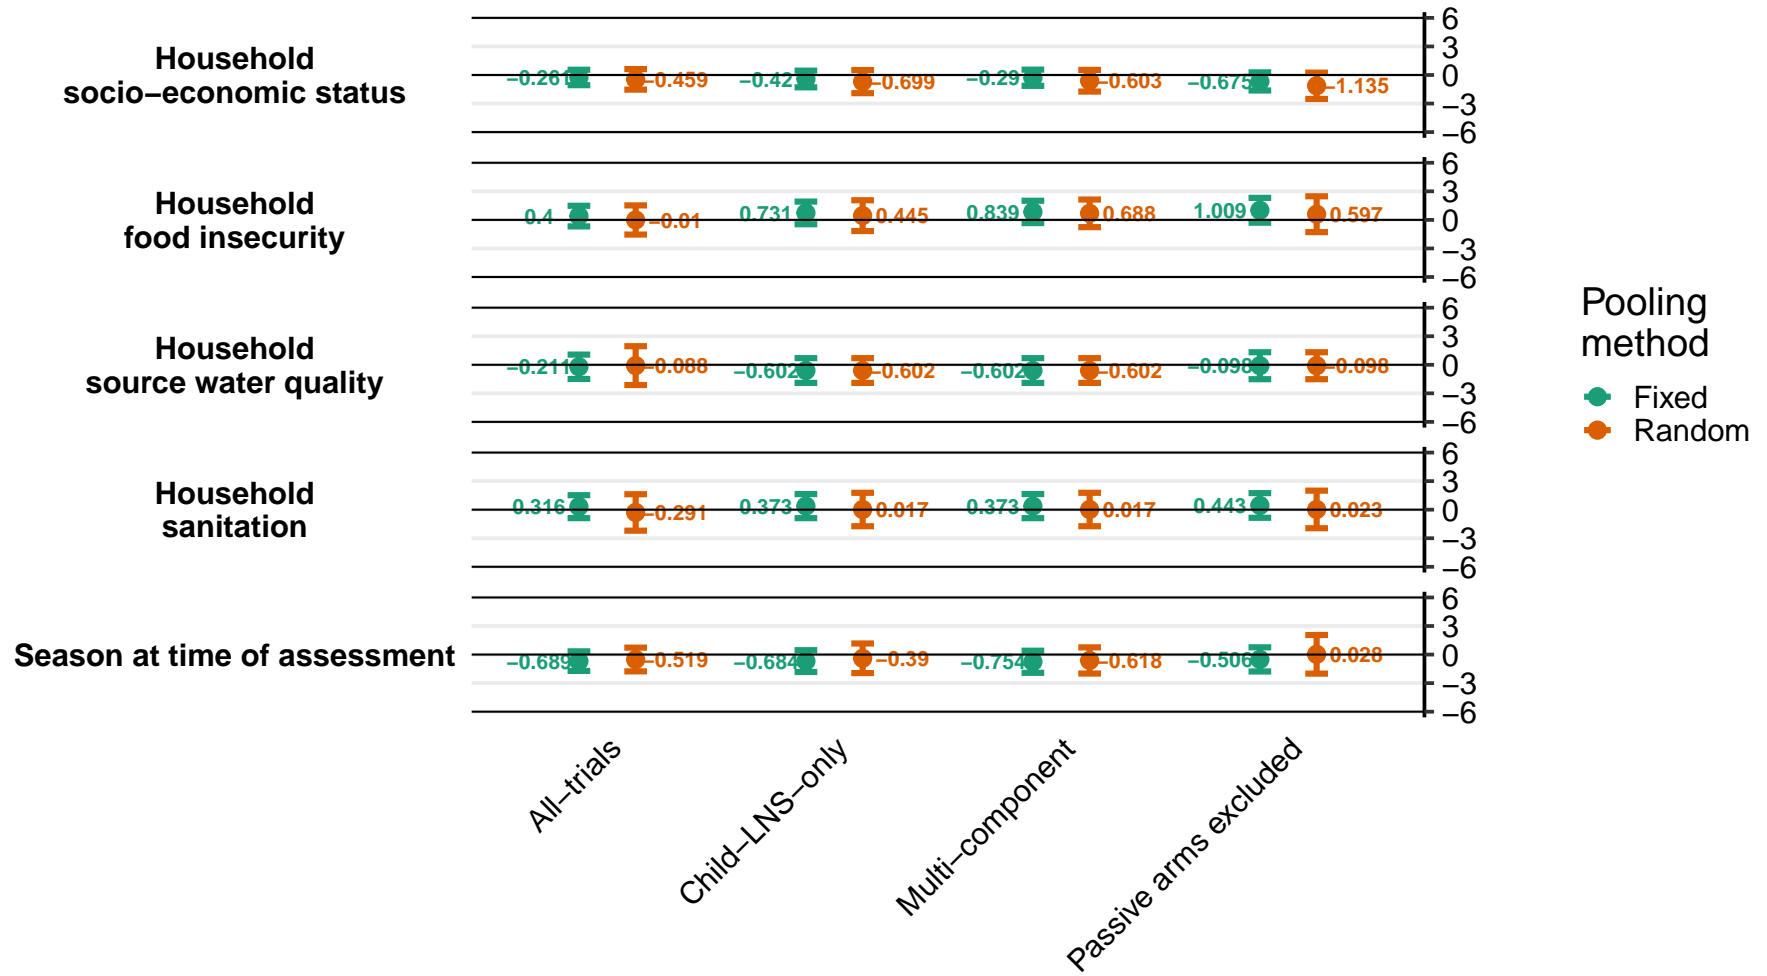

# Supplemental figure 8B: Ratio of anemia prevalence ratios

8B1: By maternal effect modifiers

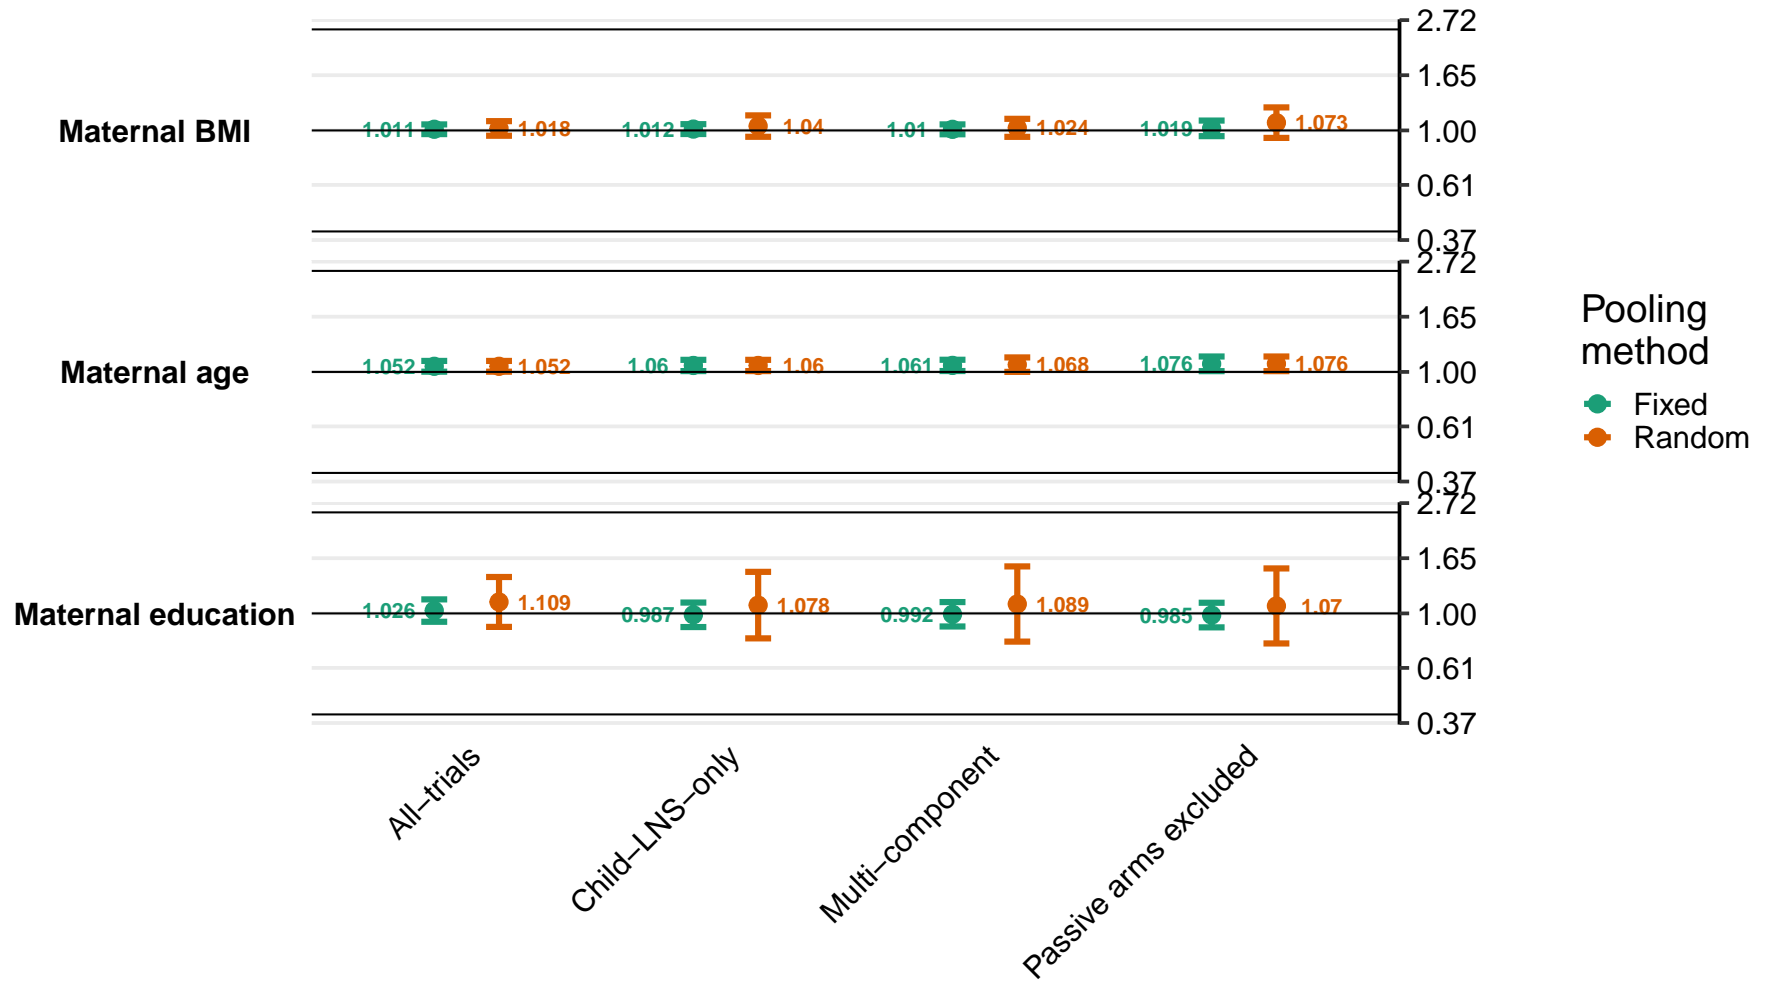

Supplemental figure 8B: Ratio of anemia prevalence ratios

8B2: By child effect modifiers

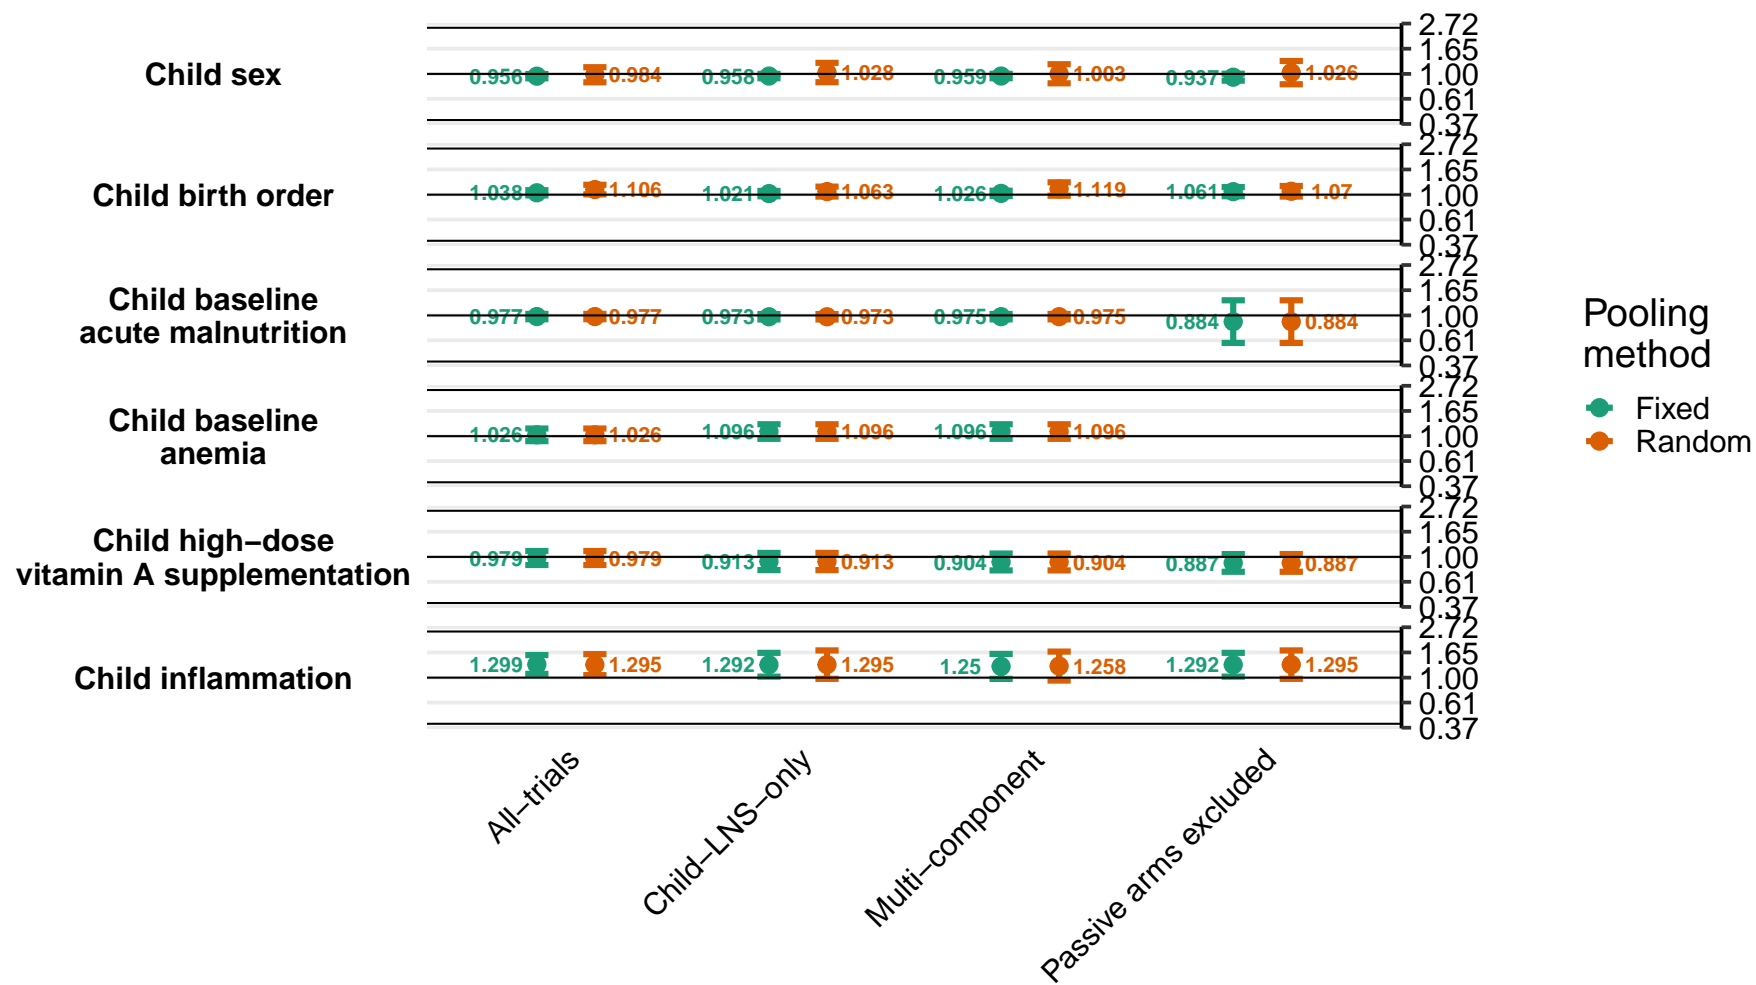

Supplemental figure 8B: Ratio of anemia prevalence ratios

8B3: By household effect modifiers

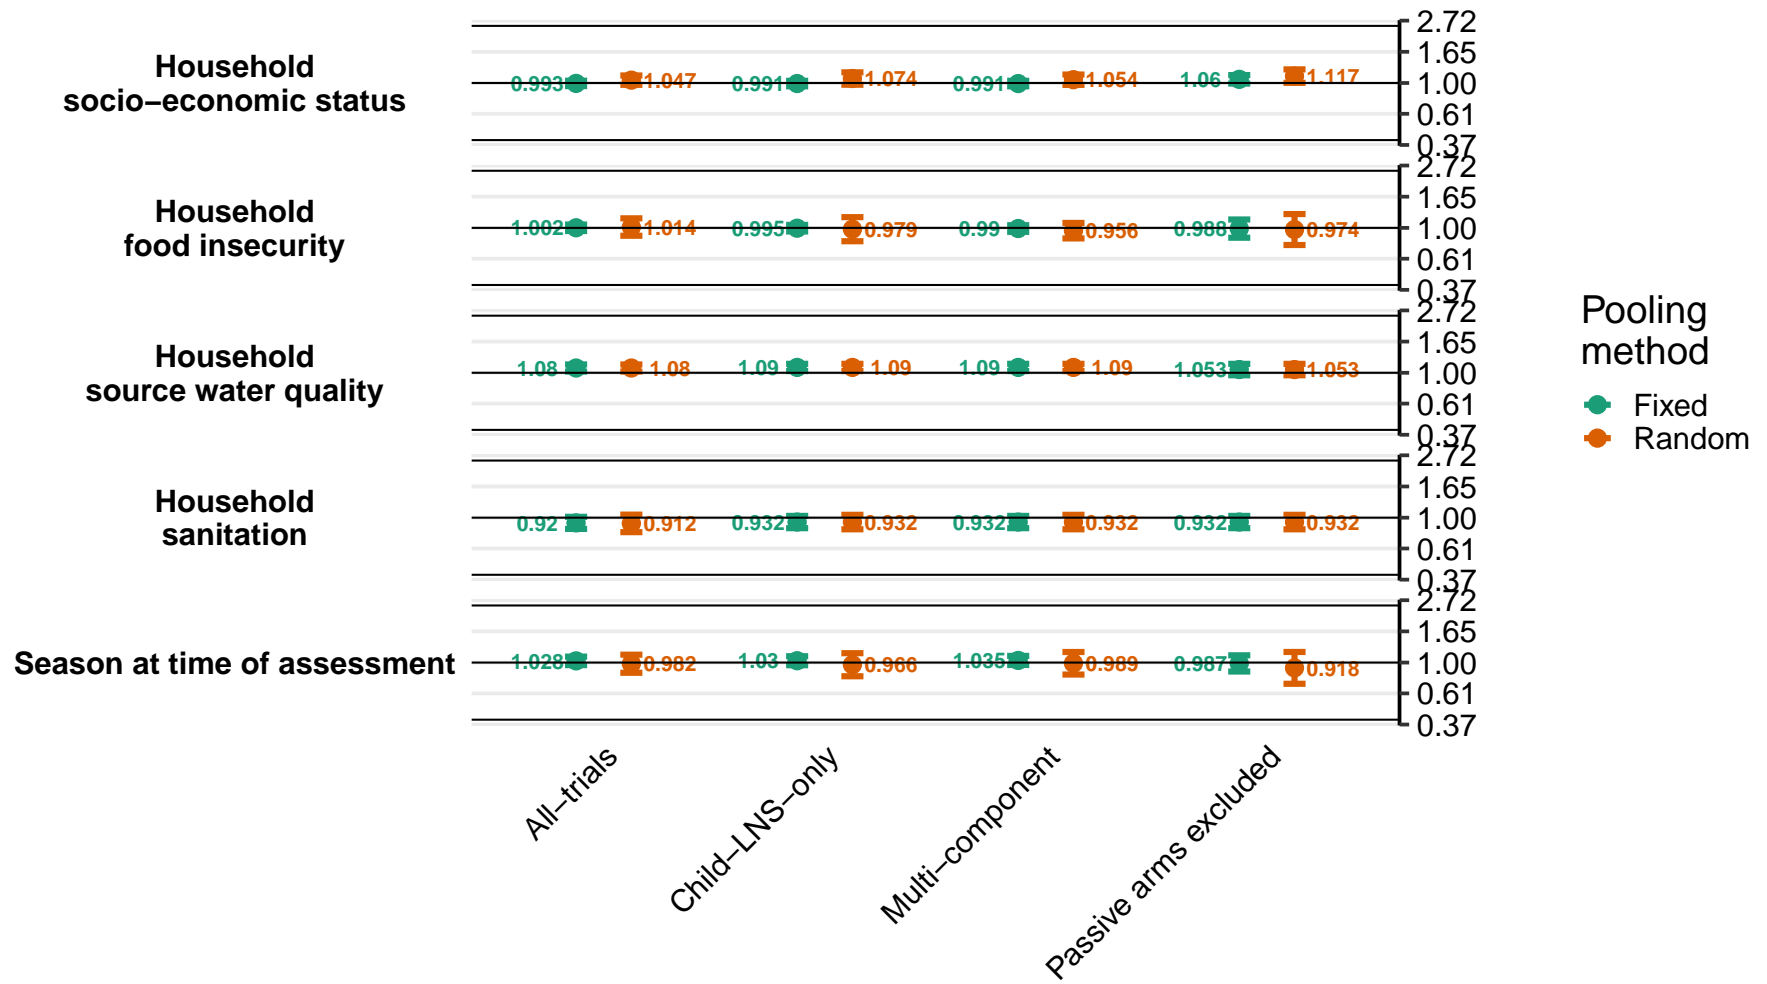

# Supplemental figure 8C: Difference in anemia prevalence differences

8C1: By maternal effect modifiers

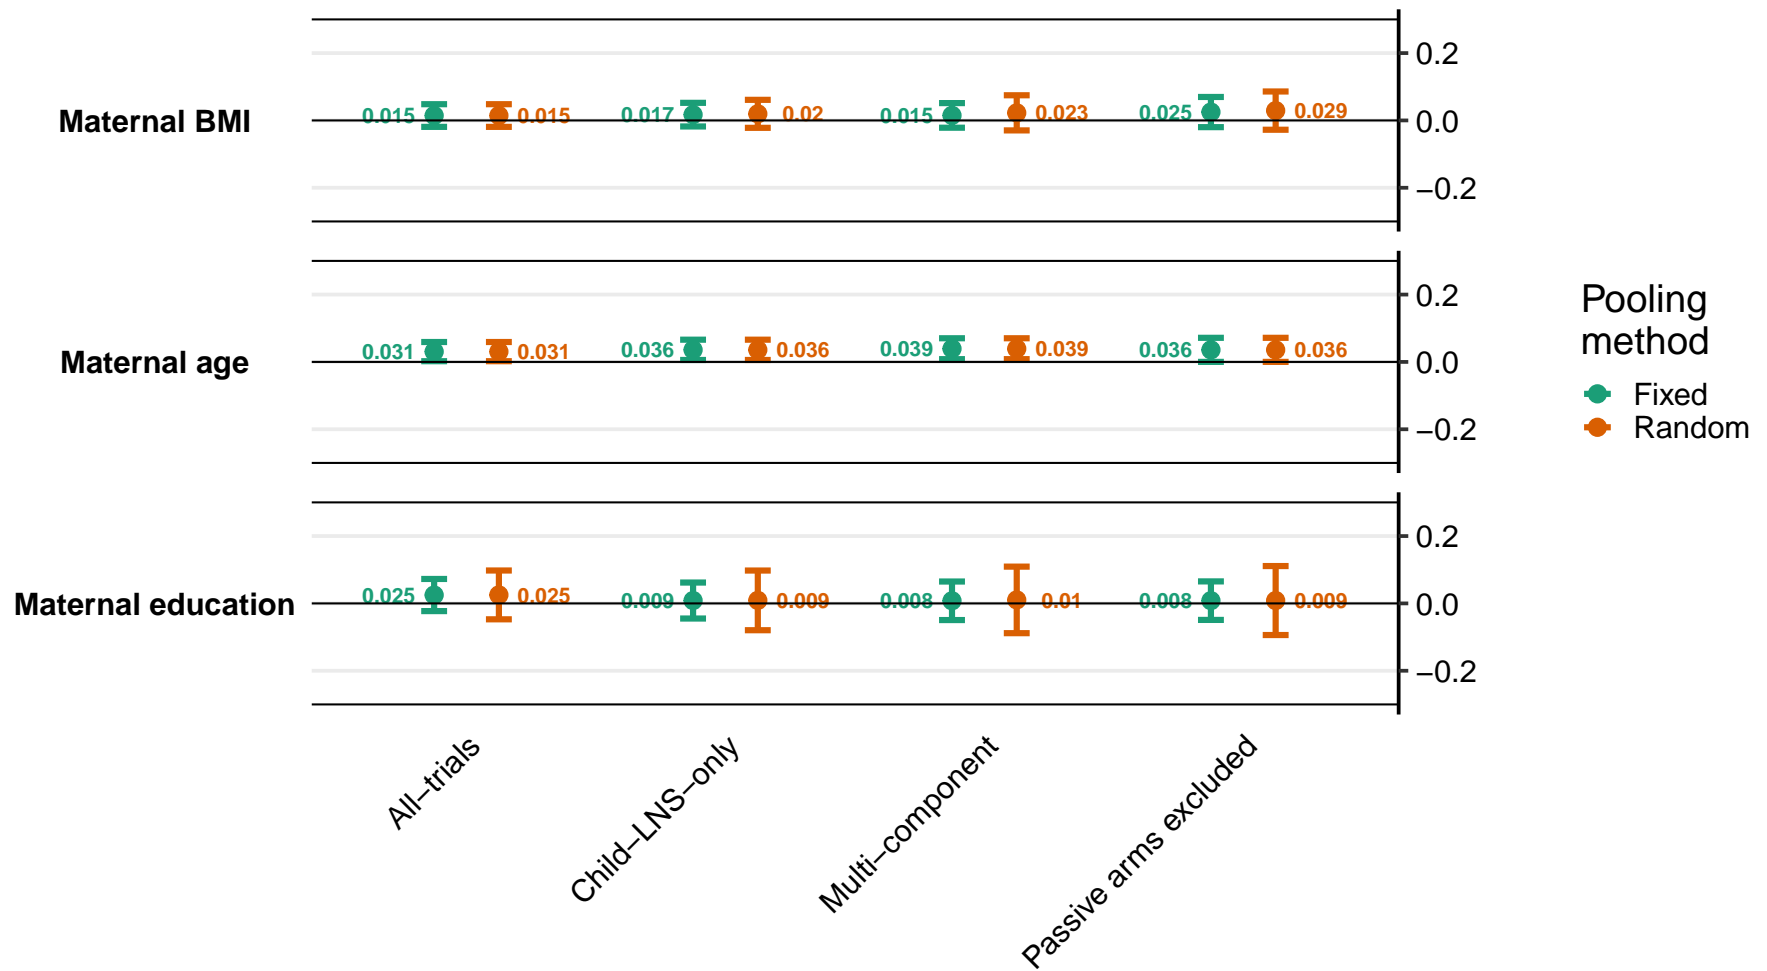

Supplemental figure 8C: Difference in anemia prevalence differences

8C2: By child effect modifiers

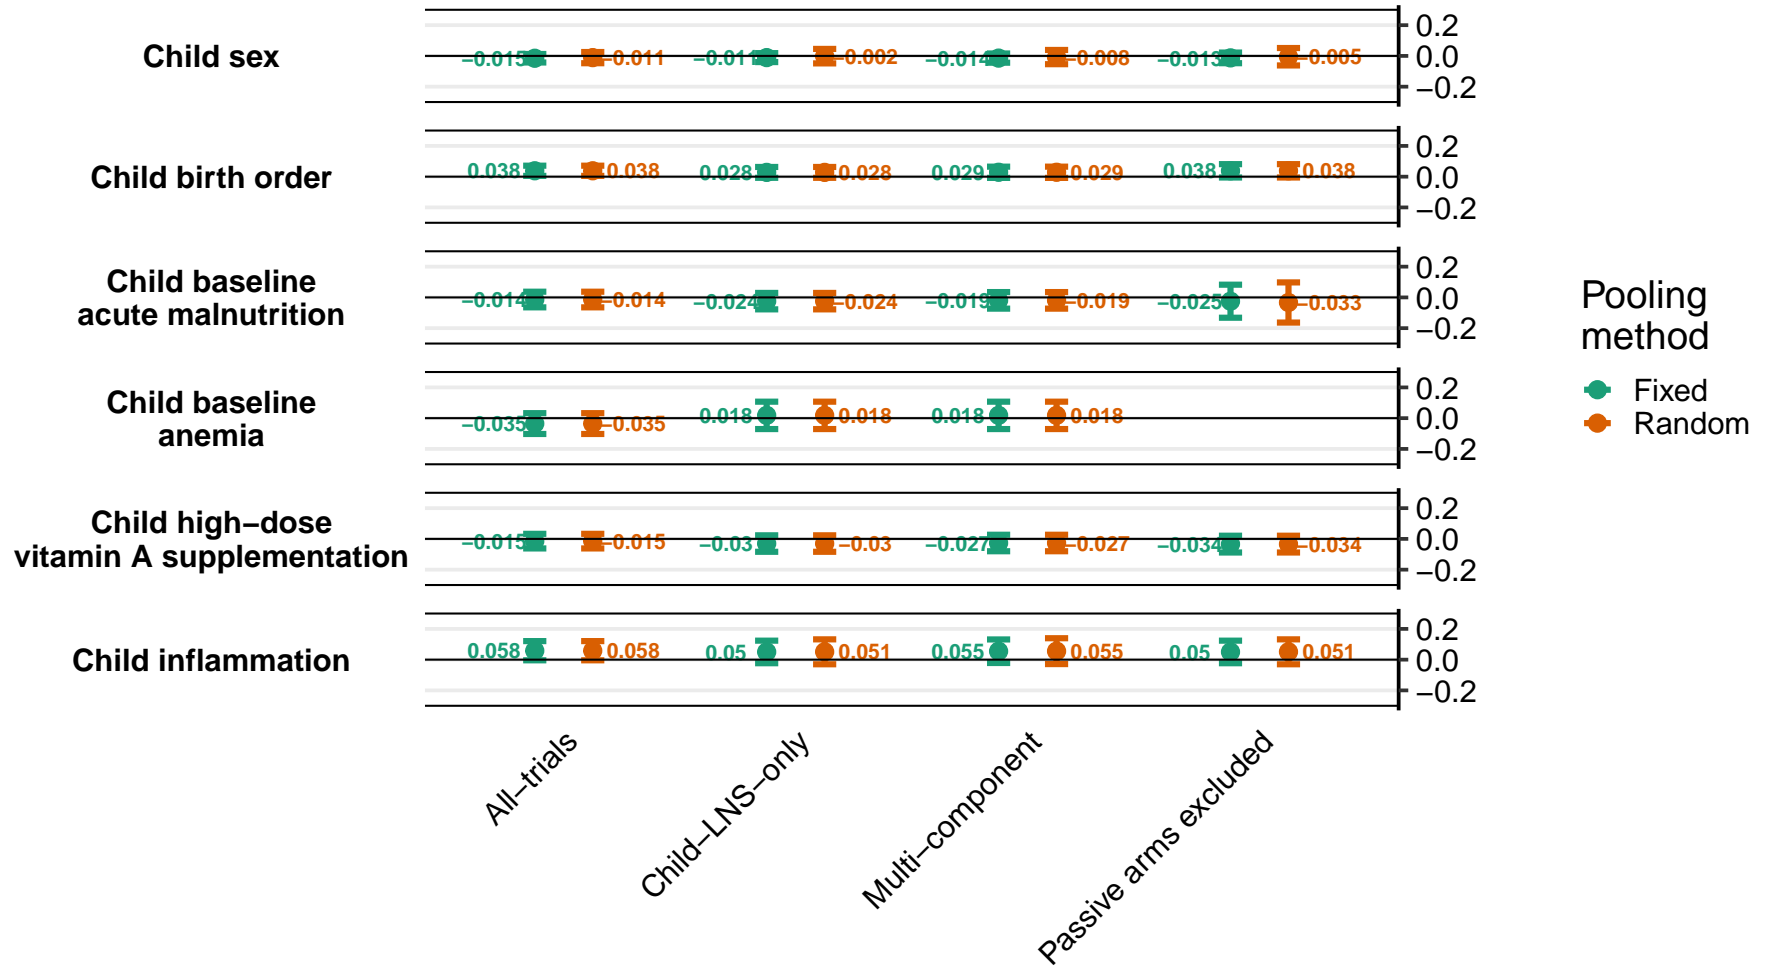

Supplemental figure 8C: Difference in anemia prevalence differences

8C3: By household effect modifiers

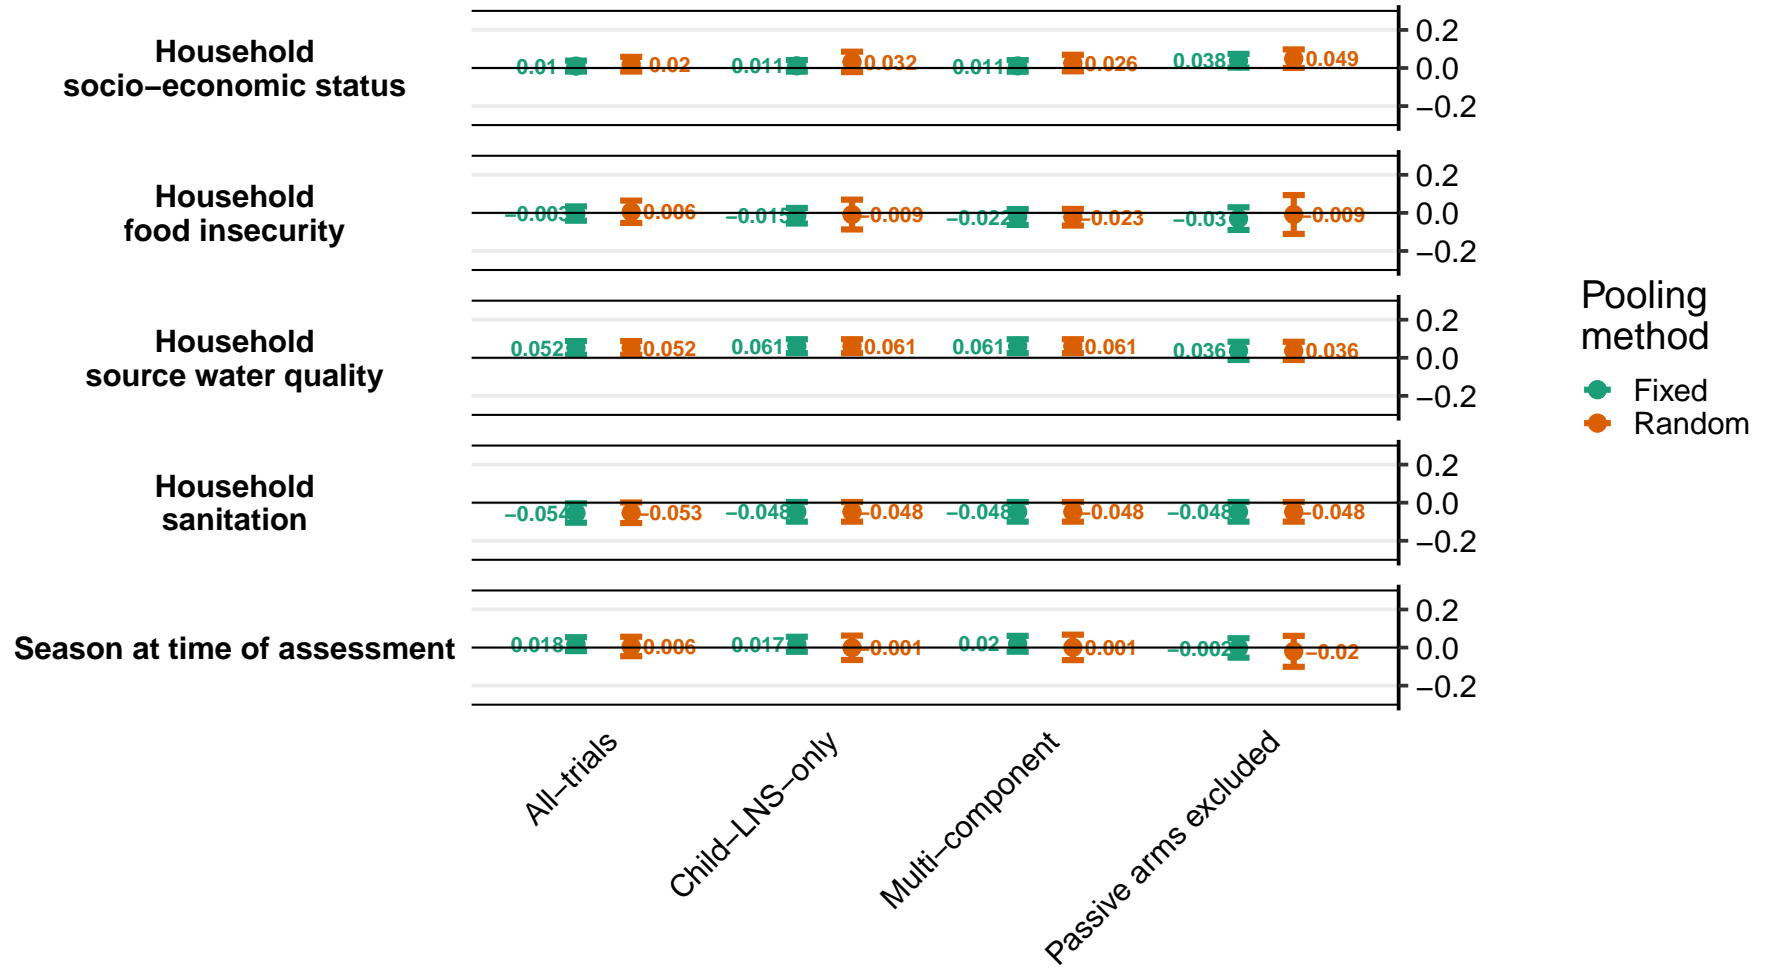



Supplemental figure 8D: Ratio of moderate-to-severe anemia prevalence ratios  
 8D1: By maternal effect modifiers

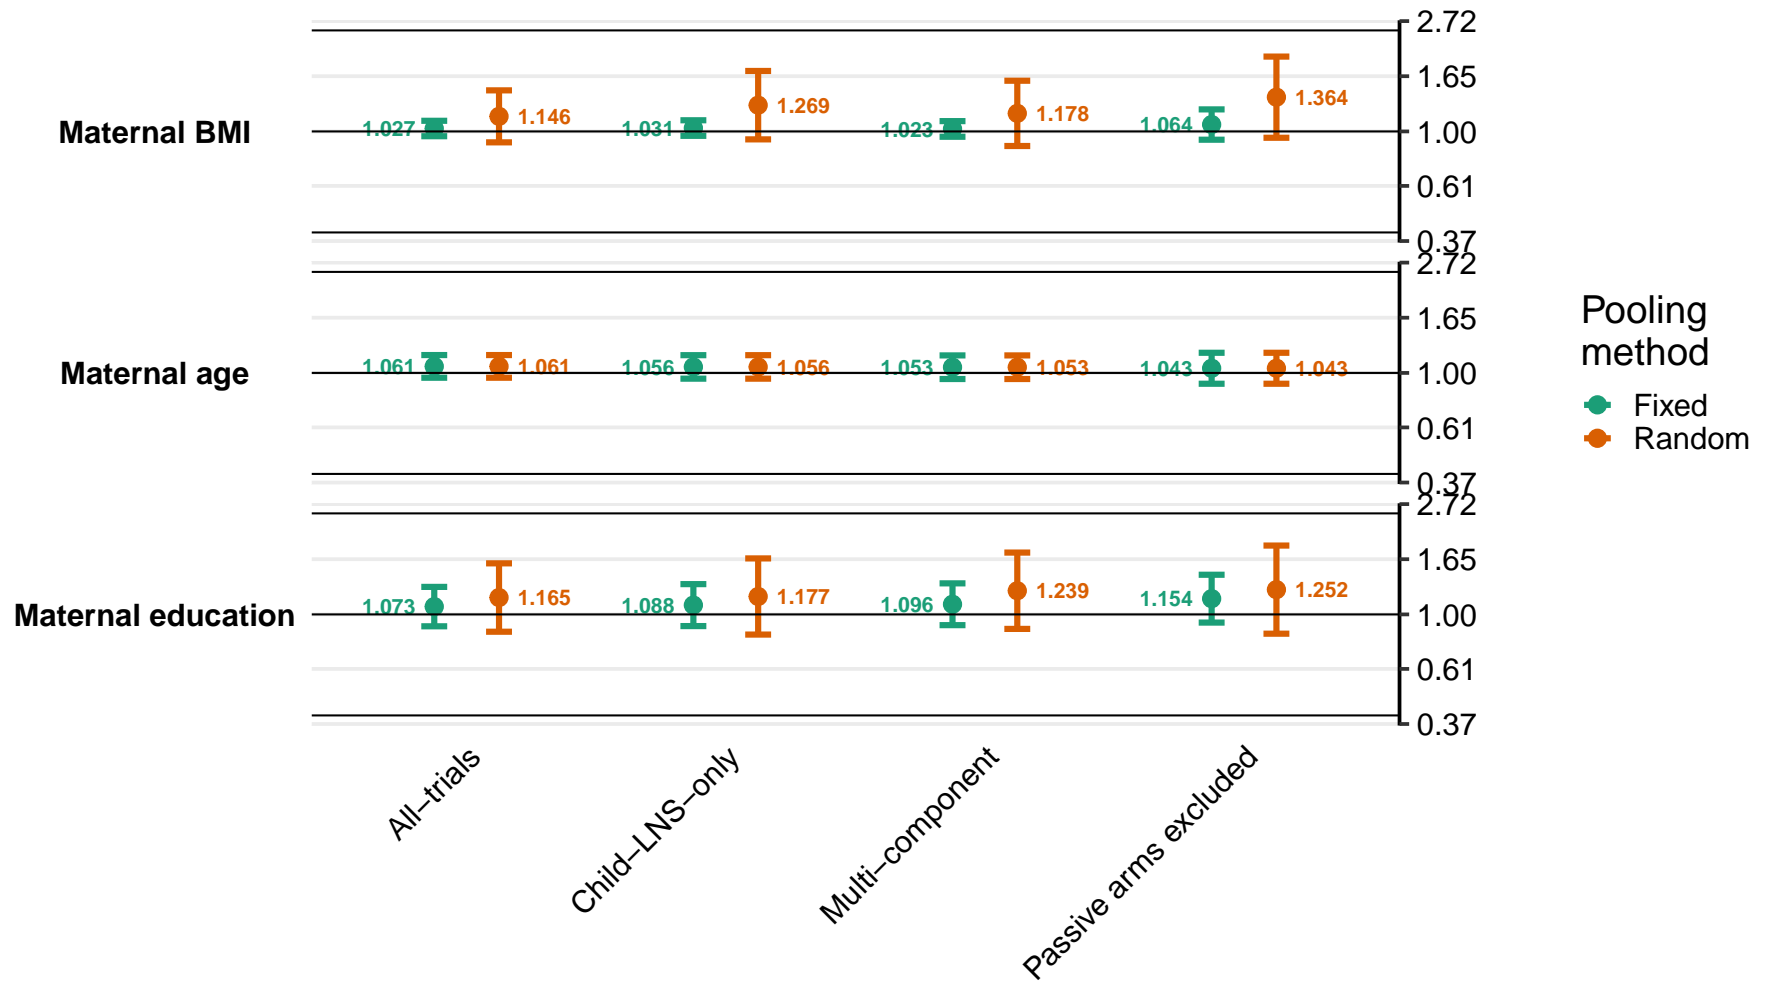

Supplemental figure 8D: Ratio of moderate-to-severe anemia prevalence ratios

8D2: By child effect modifiers

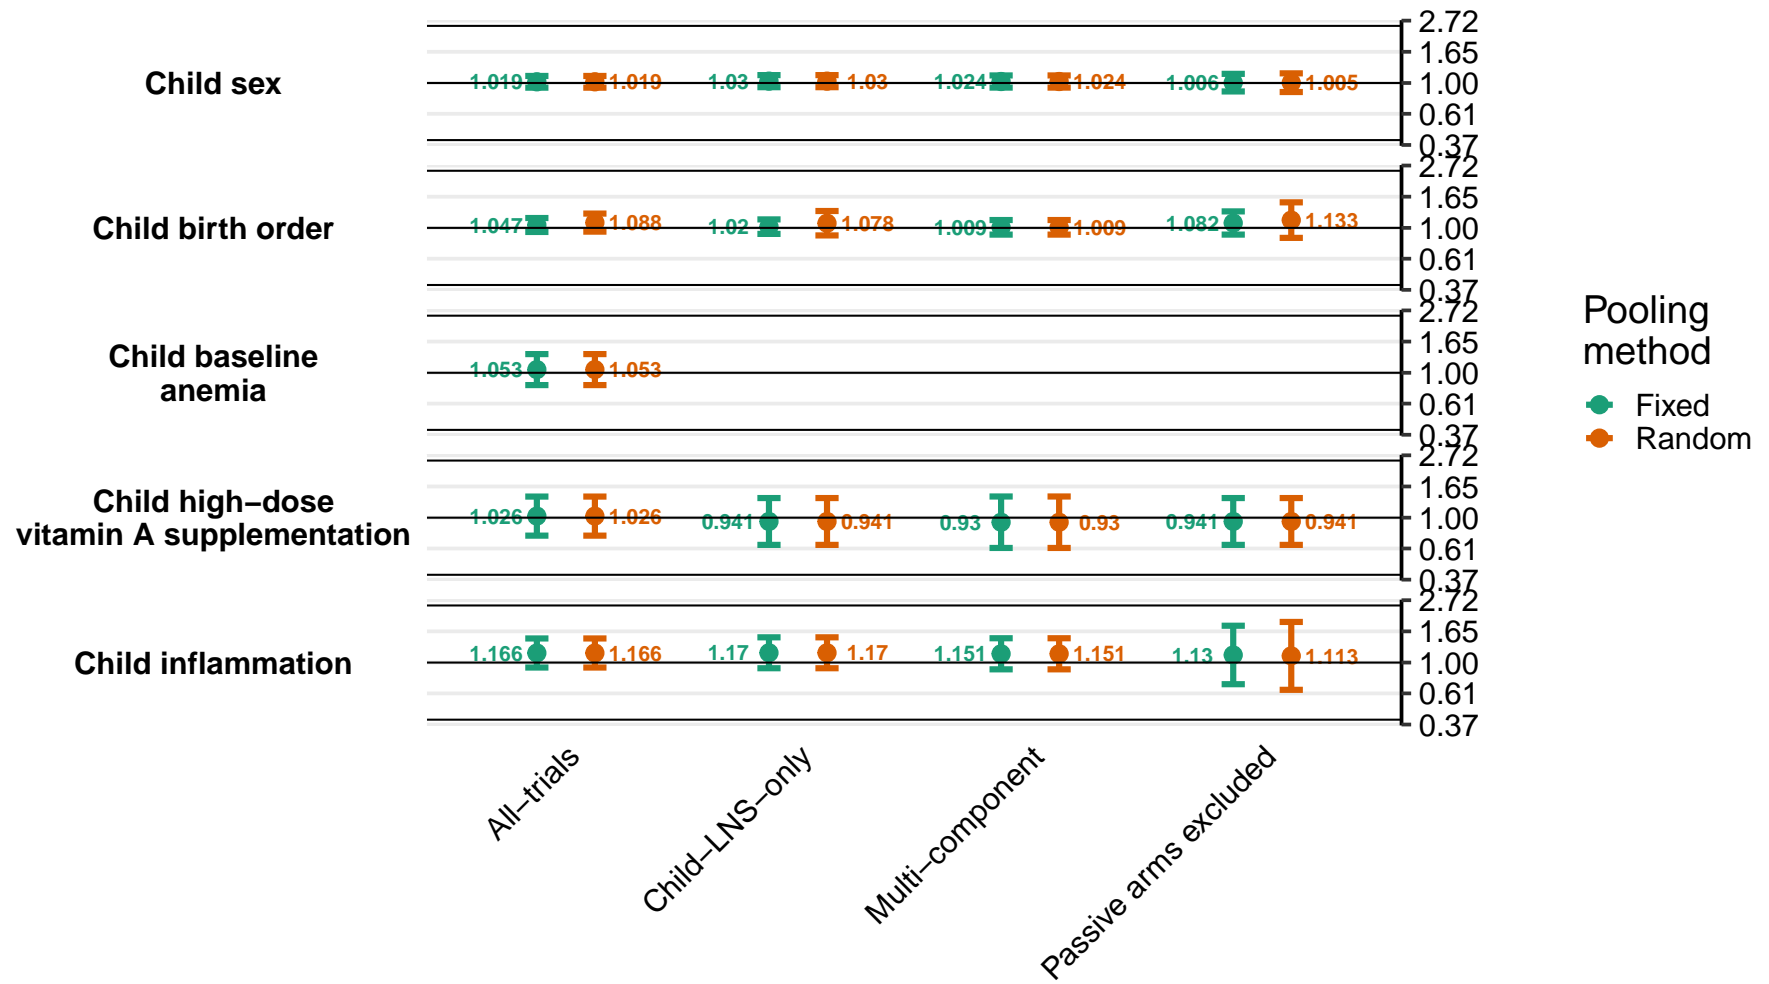

Supplemental figure 8D: Ratio of moderate-to-severe anemia prevalence ratios

8D3: By household effect modifiers

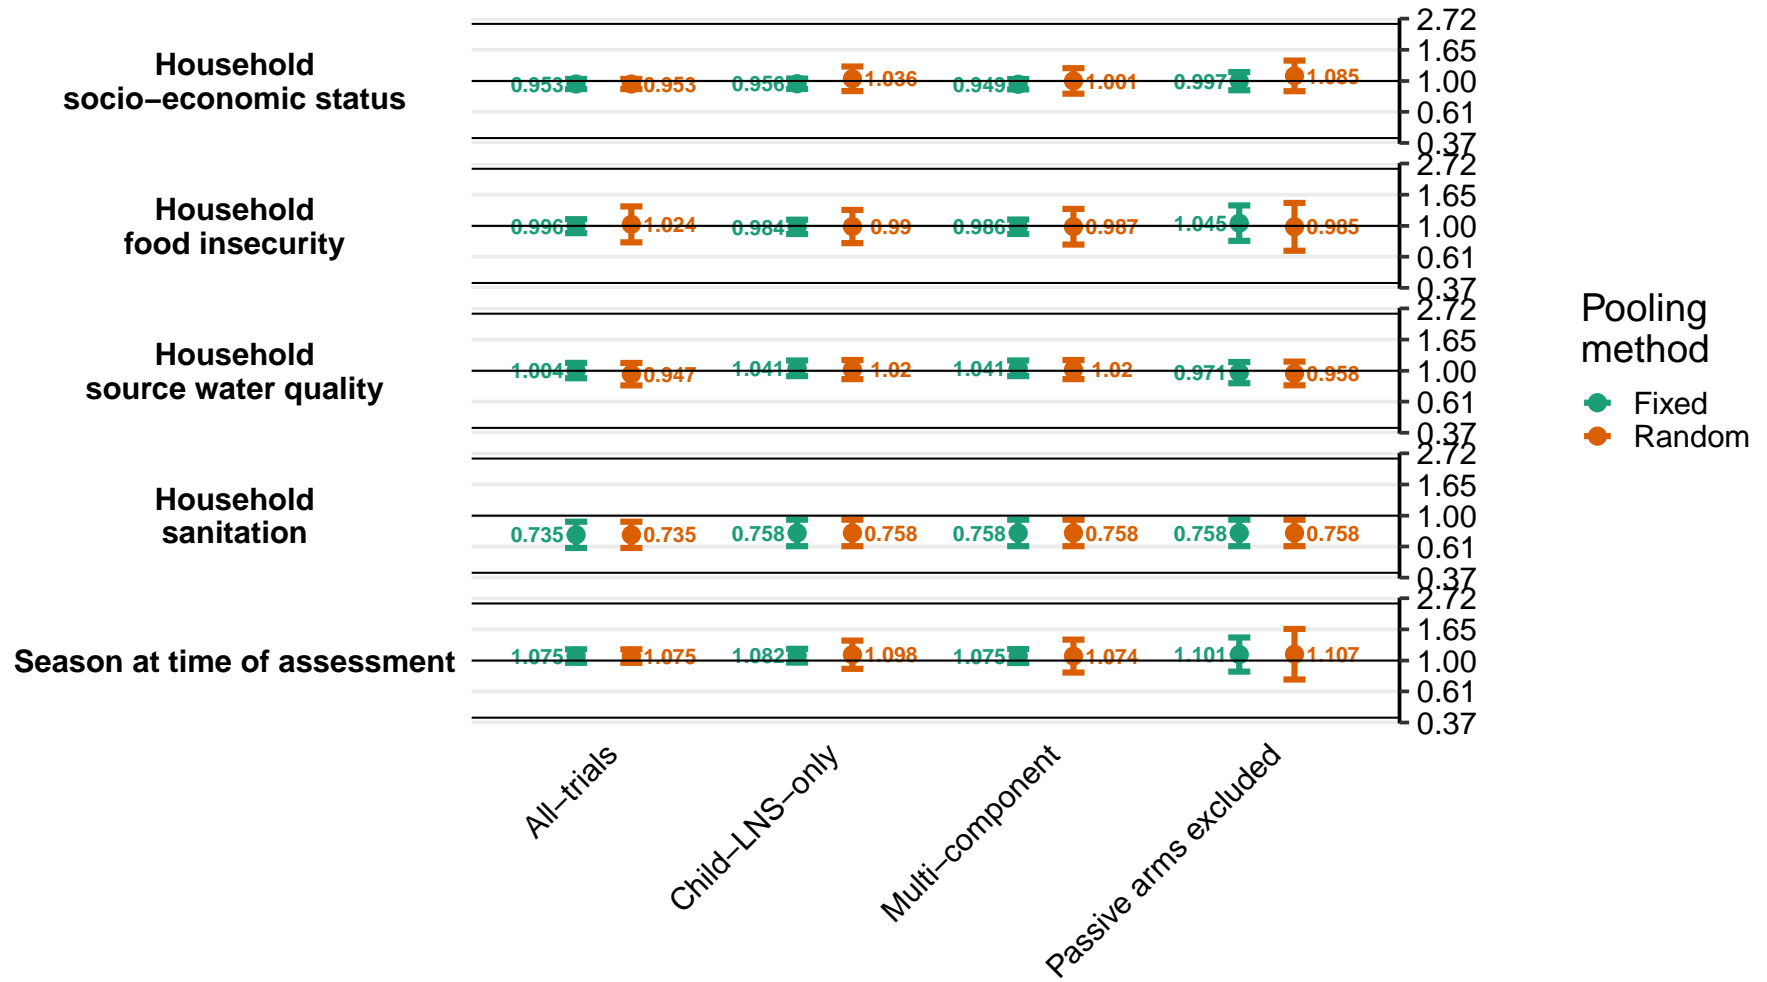

# Supplemental figure 8E: Difference in moderate-to-severe anemia prevalence differences

8E1: By maternal effect modifiers

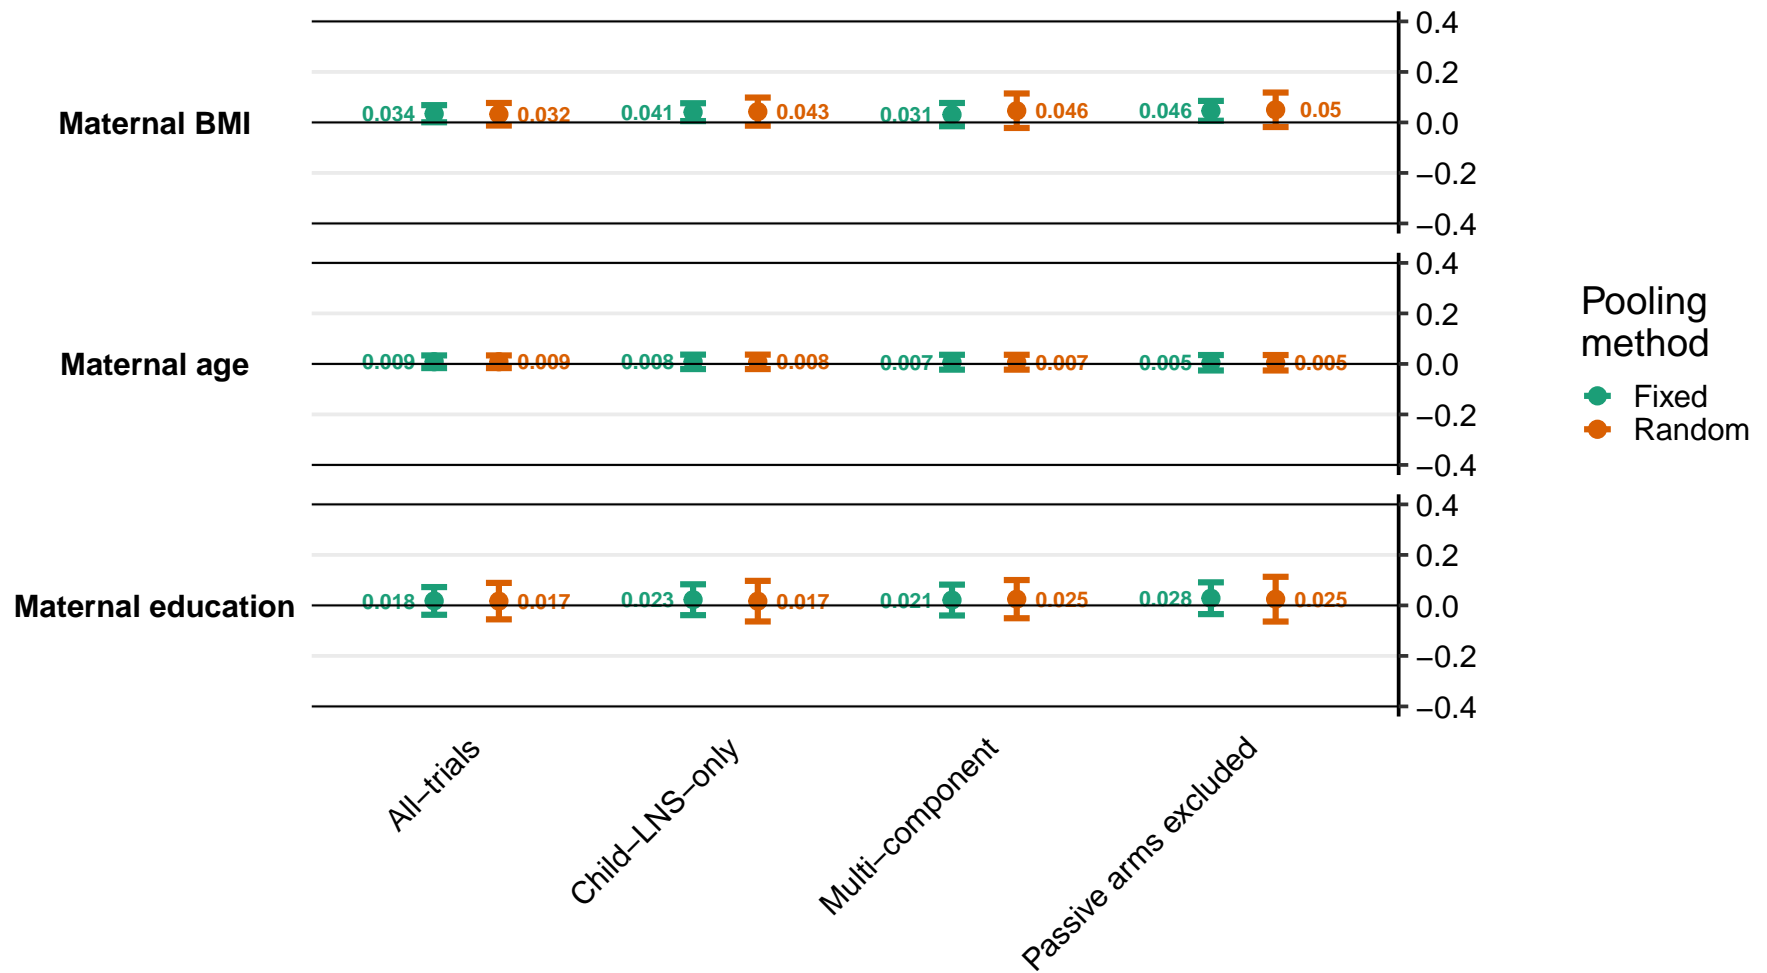

Supplemental figure 8E: Difference in moderate-to-severe anemia prevalence differences

8E2: By child effect modifiers

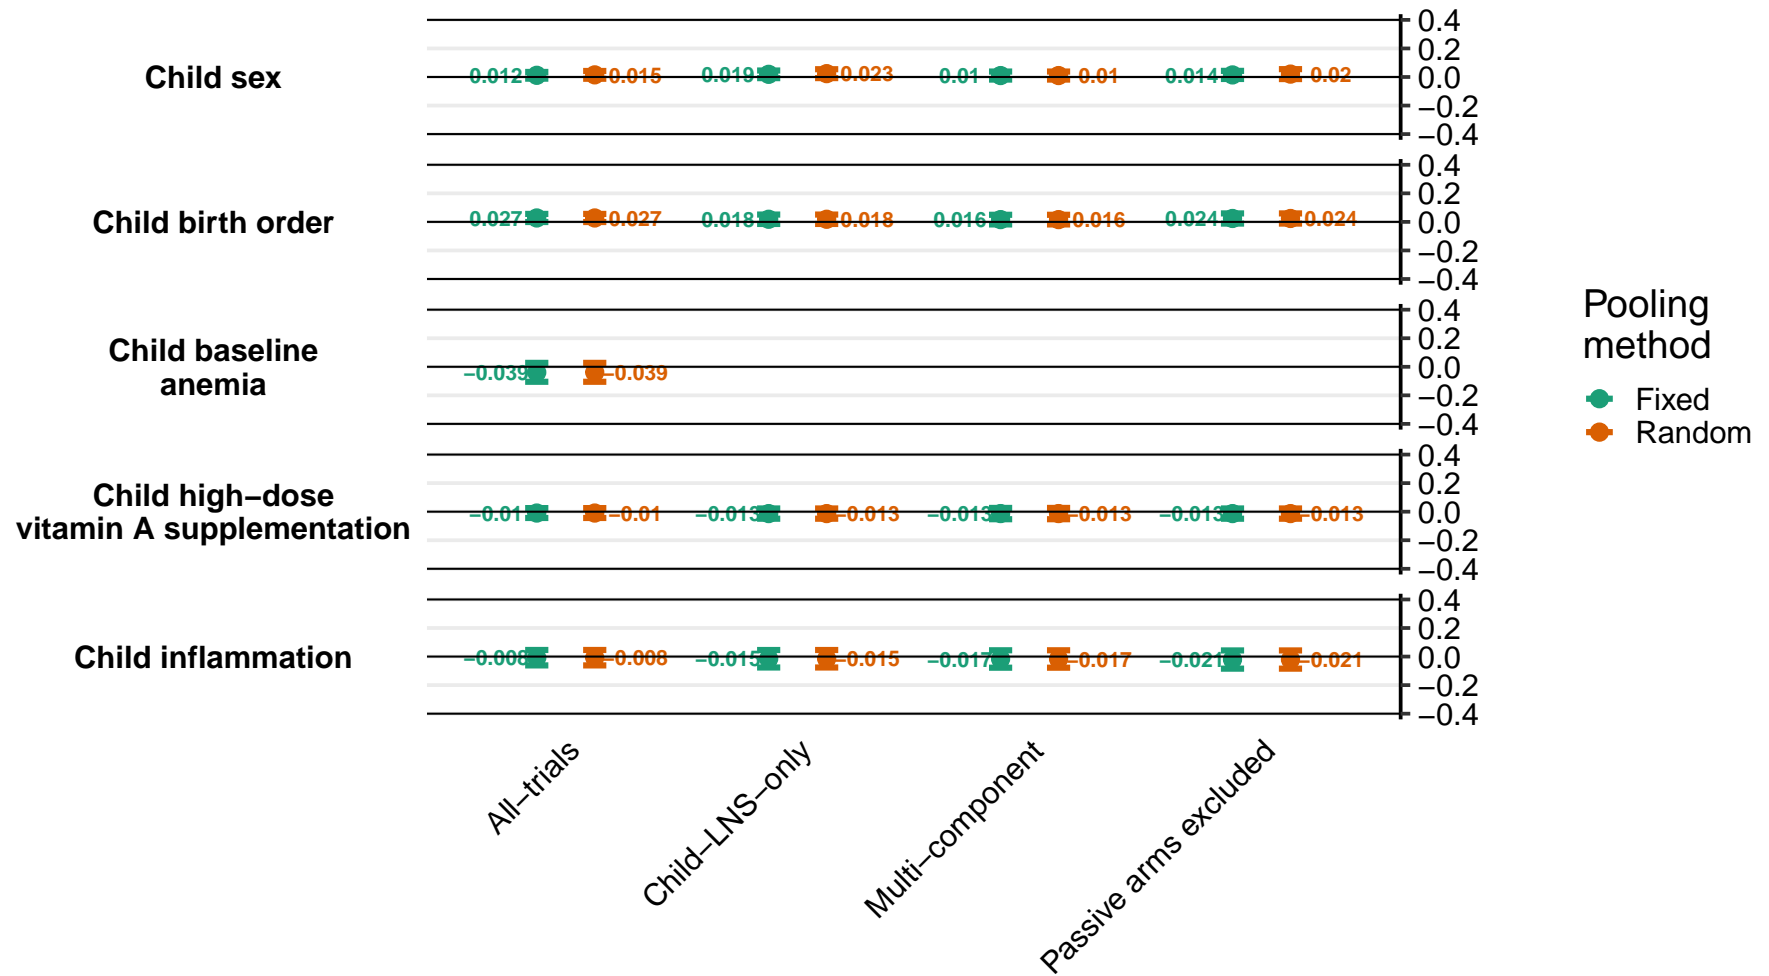

Supplemental figure 8E: Difference in moderate-to-severe anemia prevalence differences

8E3: By household effect modifiers

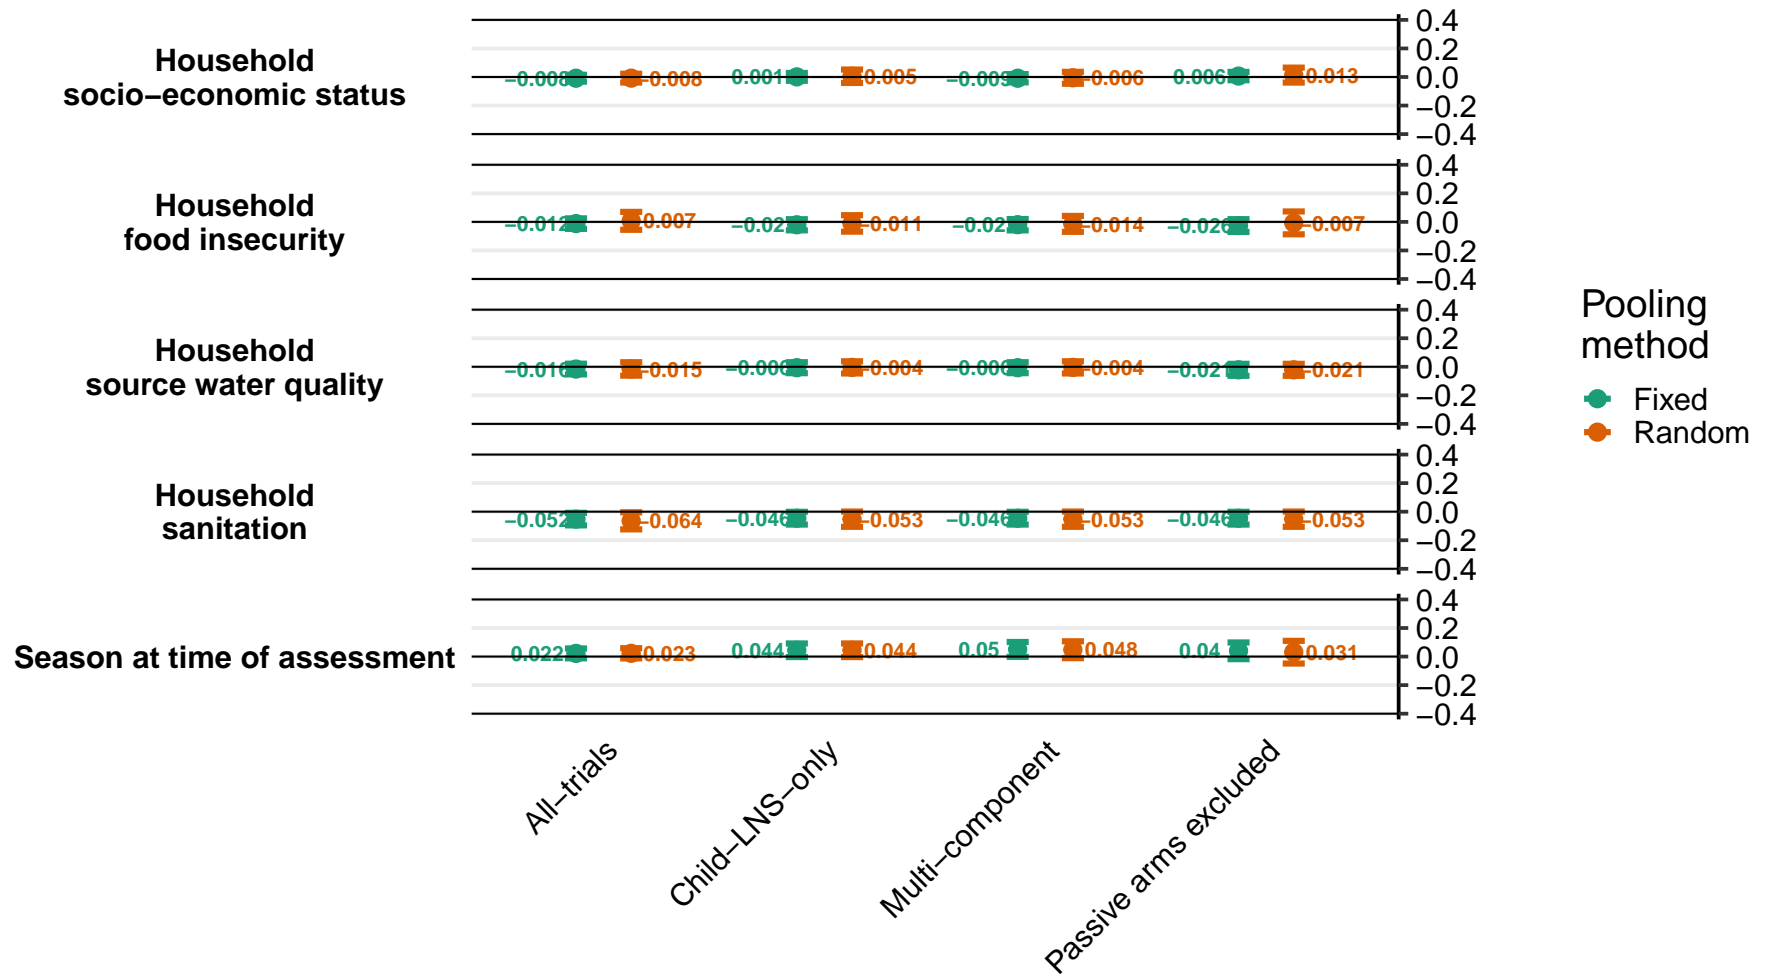

# Supplemental figure 8F: Ratio of geometric mean ratios of ferritin concentration

8F1: By maternal effect modifiers

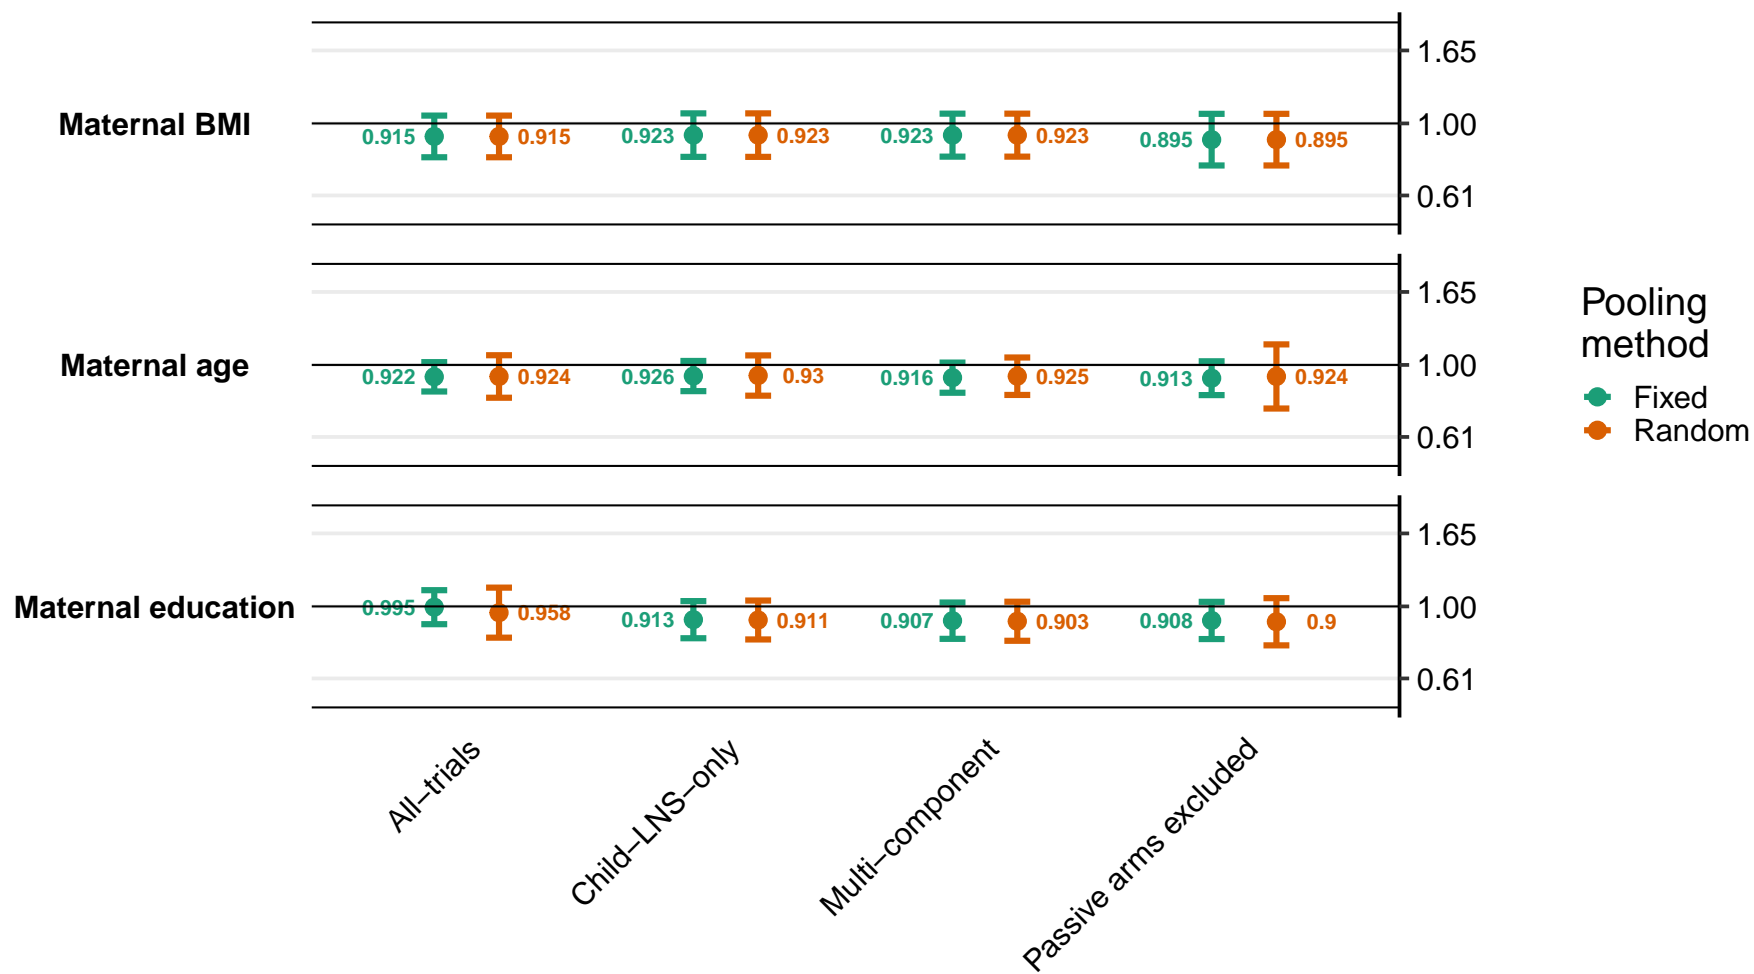

Supplemental figure 8F: Ratio of geometric mean ratios of ferritin concentration

8F2: By child effect modifiers

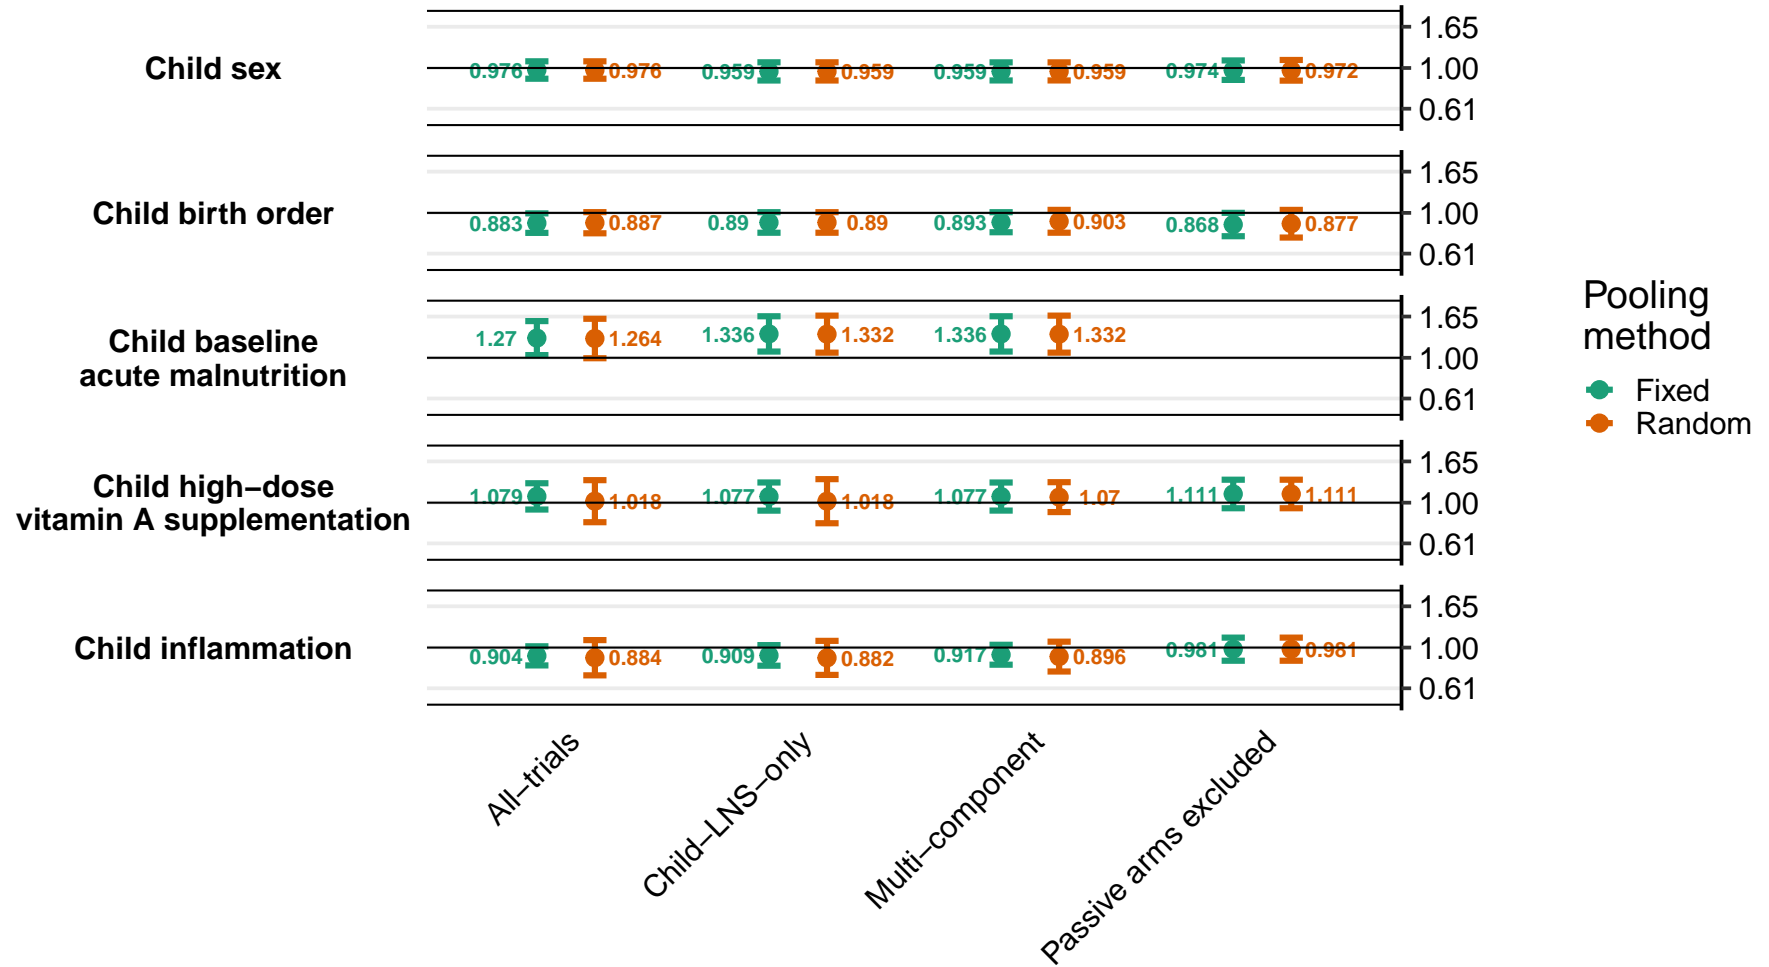



Supplemental figure 8F: Ratio of geometric mean ratios of ferritin concentration

8F3: By household effect modifiers

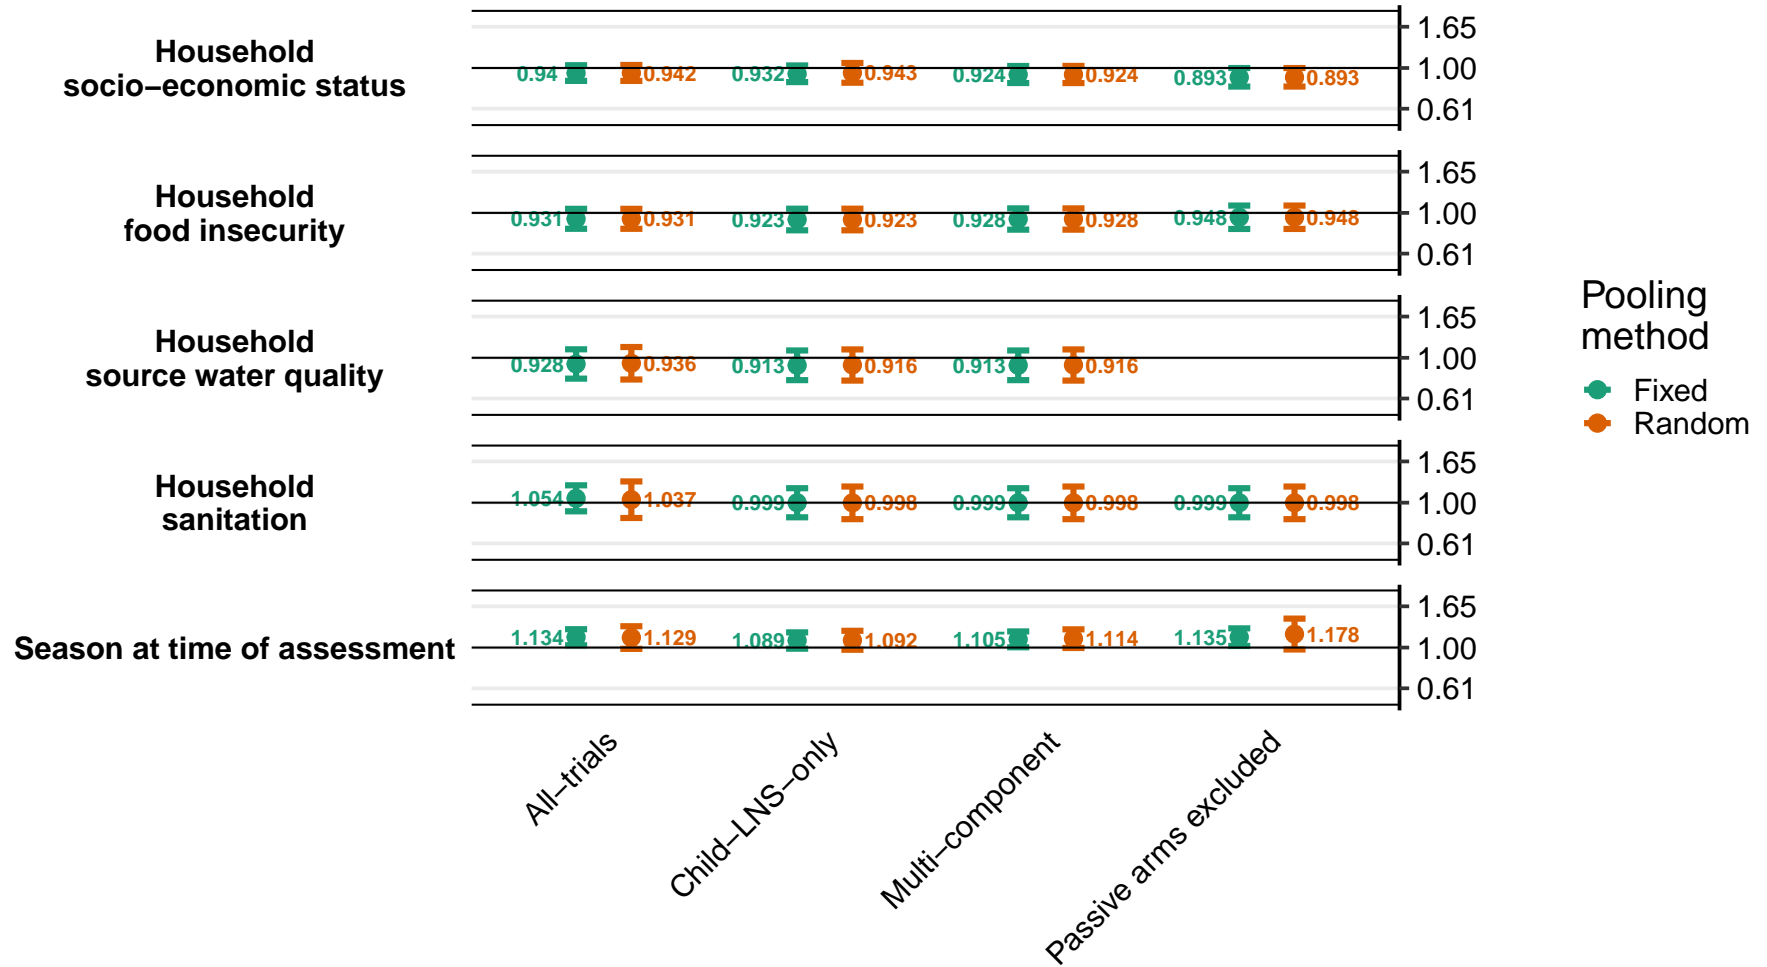

Supplemental figure 8G: Ratio of iron deficiency (ferritin < 12 µg/L) prevalence ratios  
 8G1: By maternal effect modifiers

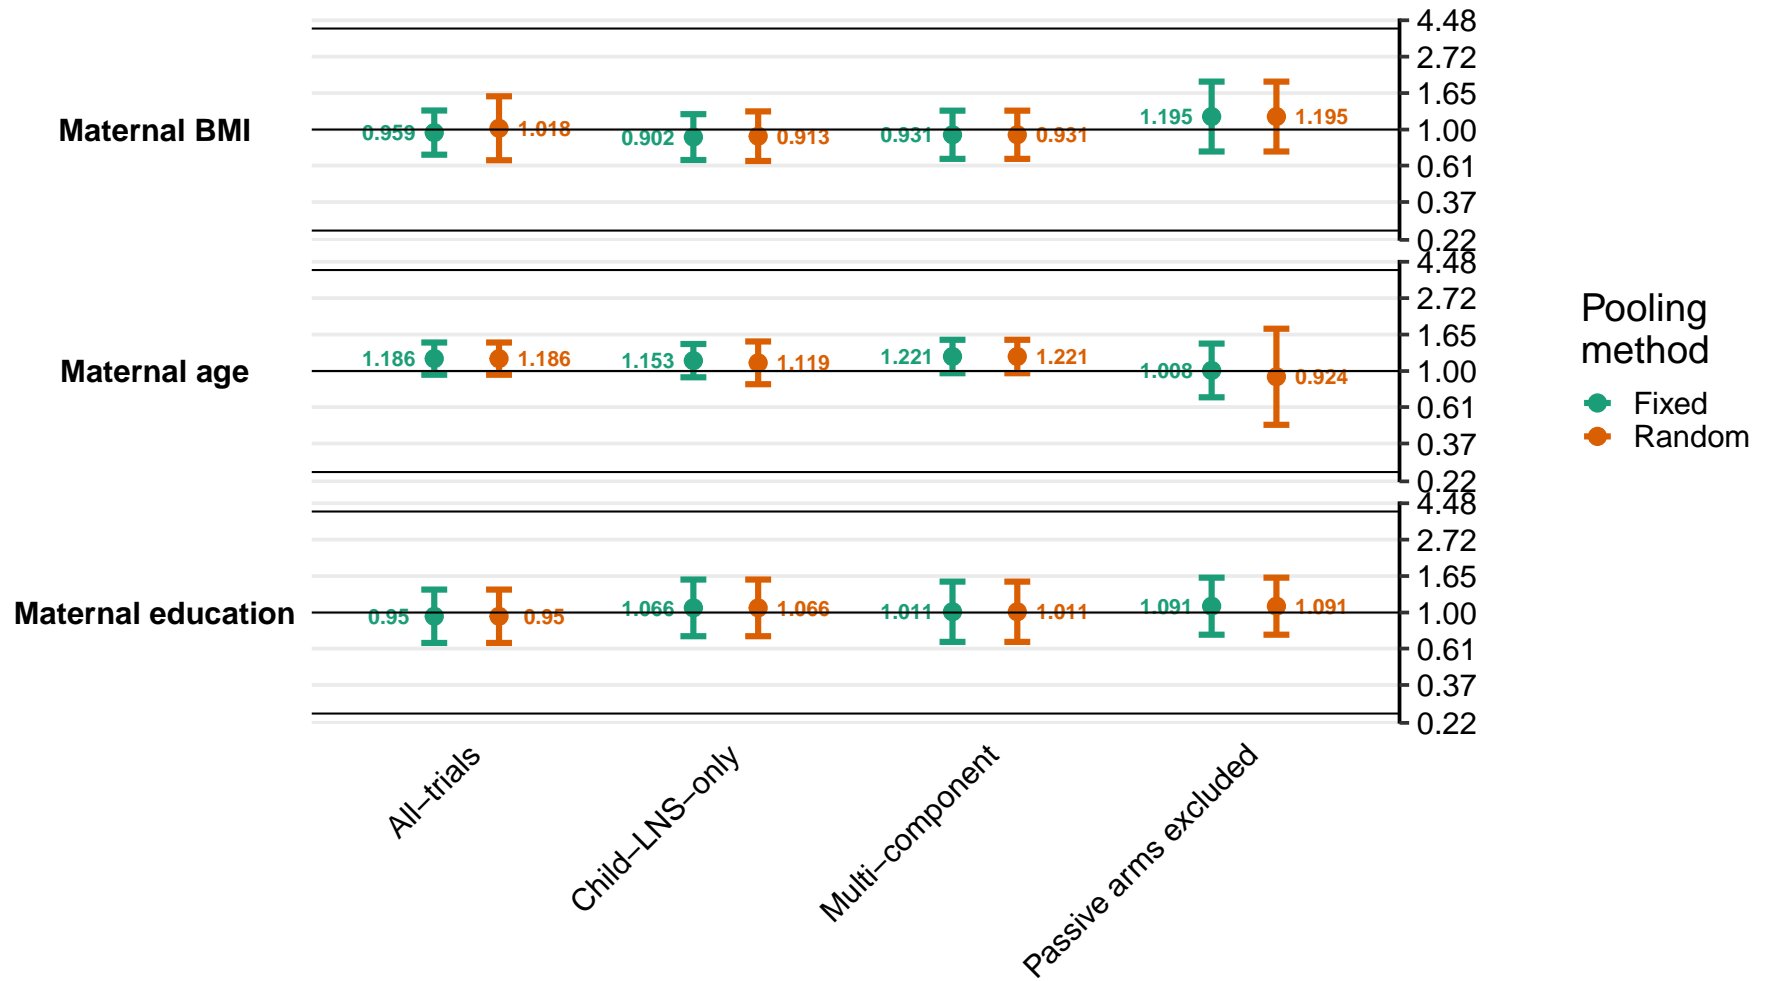

Supplemental figure 8G: Ratio of iron deficiency (ferritin < 12 µg/L) prevalence ratios

8G2: By child effect modifiers

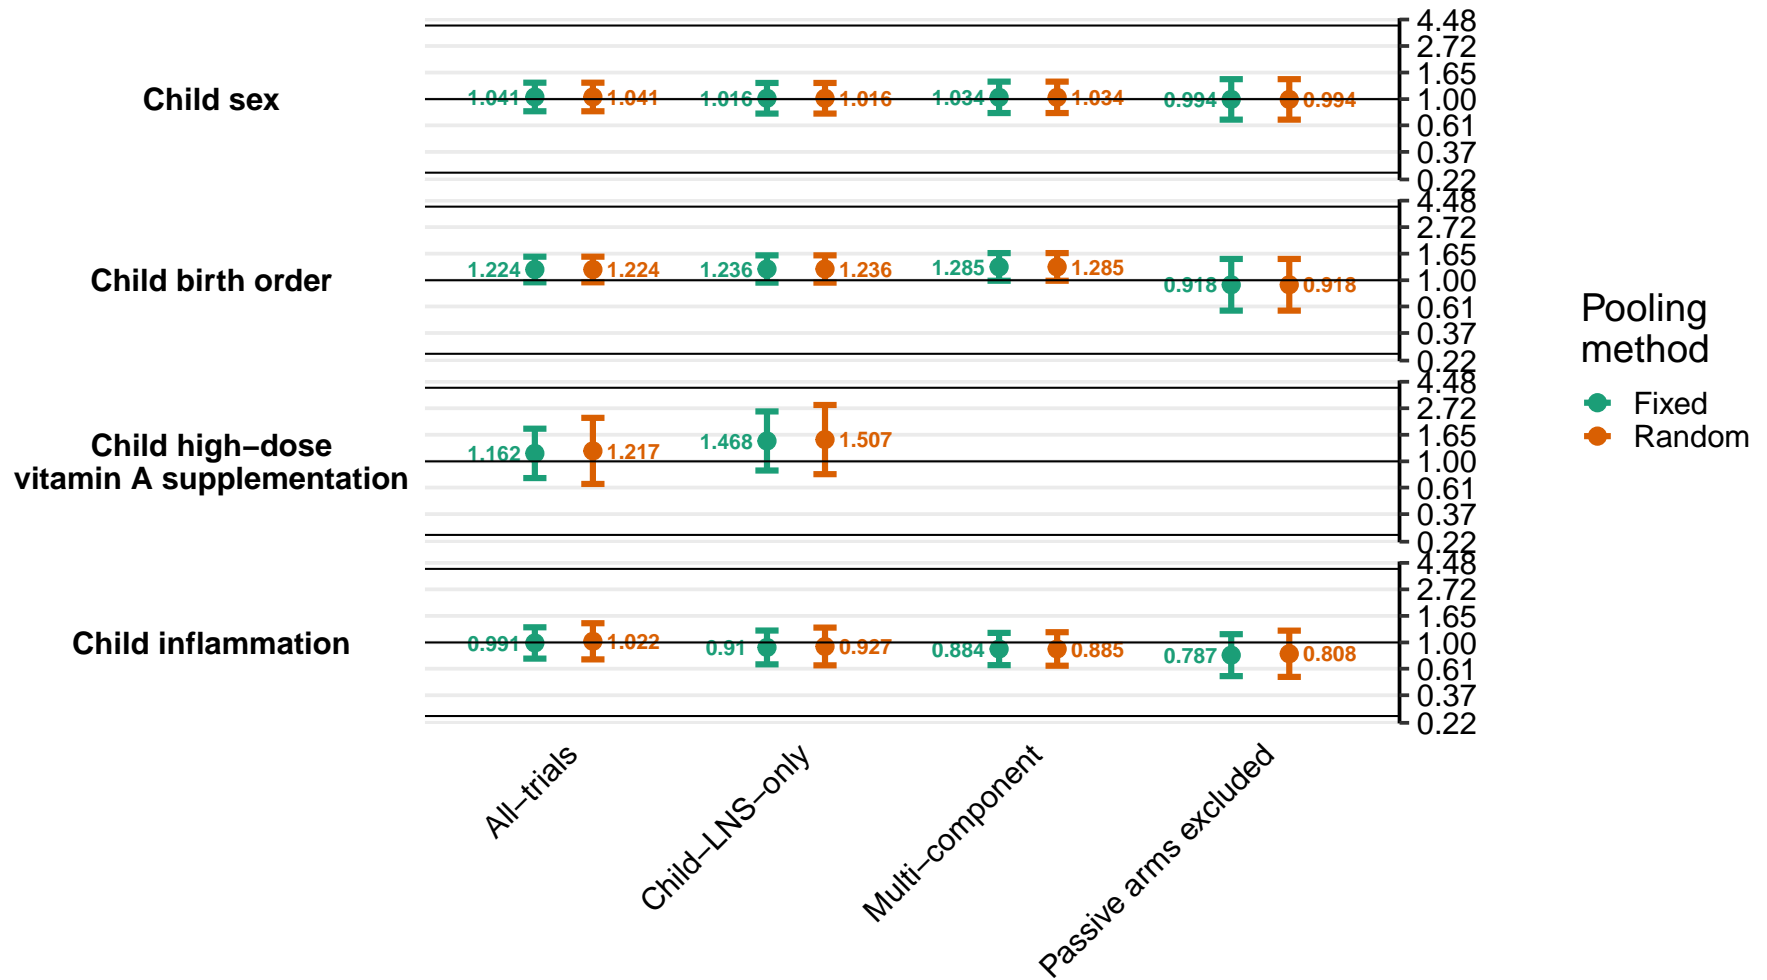

Supplemental figure 8G: Ratio of iron deficiency (ferritin < 12 µg/L) prevalence ratios

8G3: By household effect modifiers

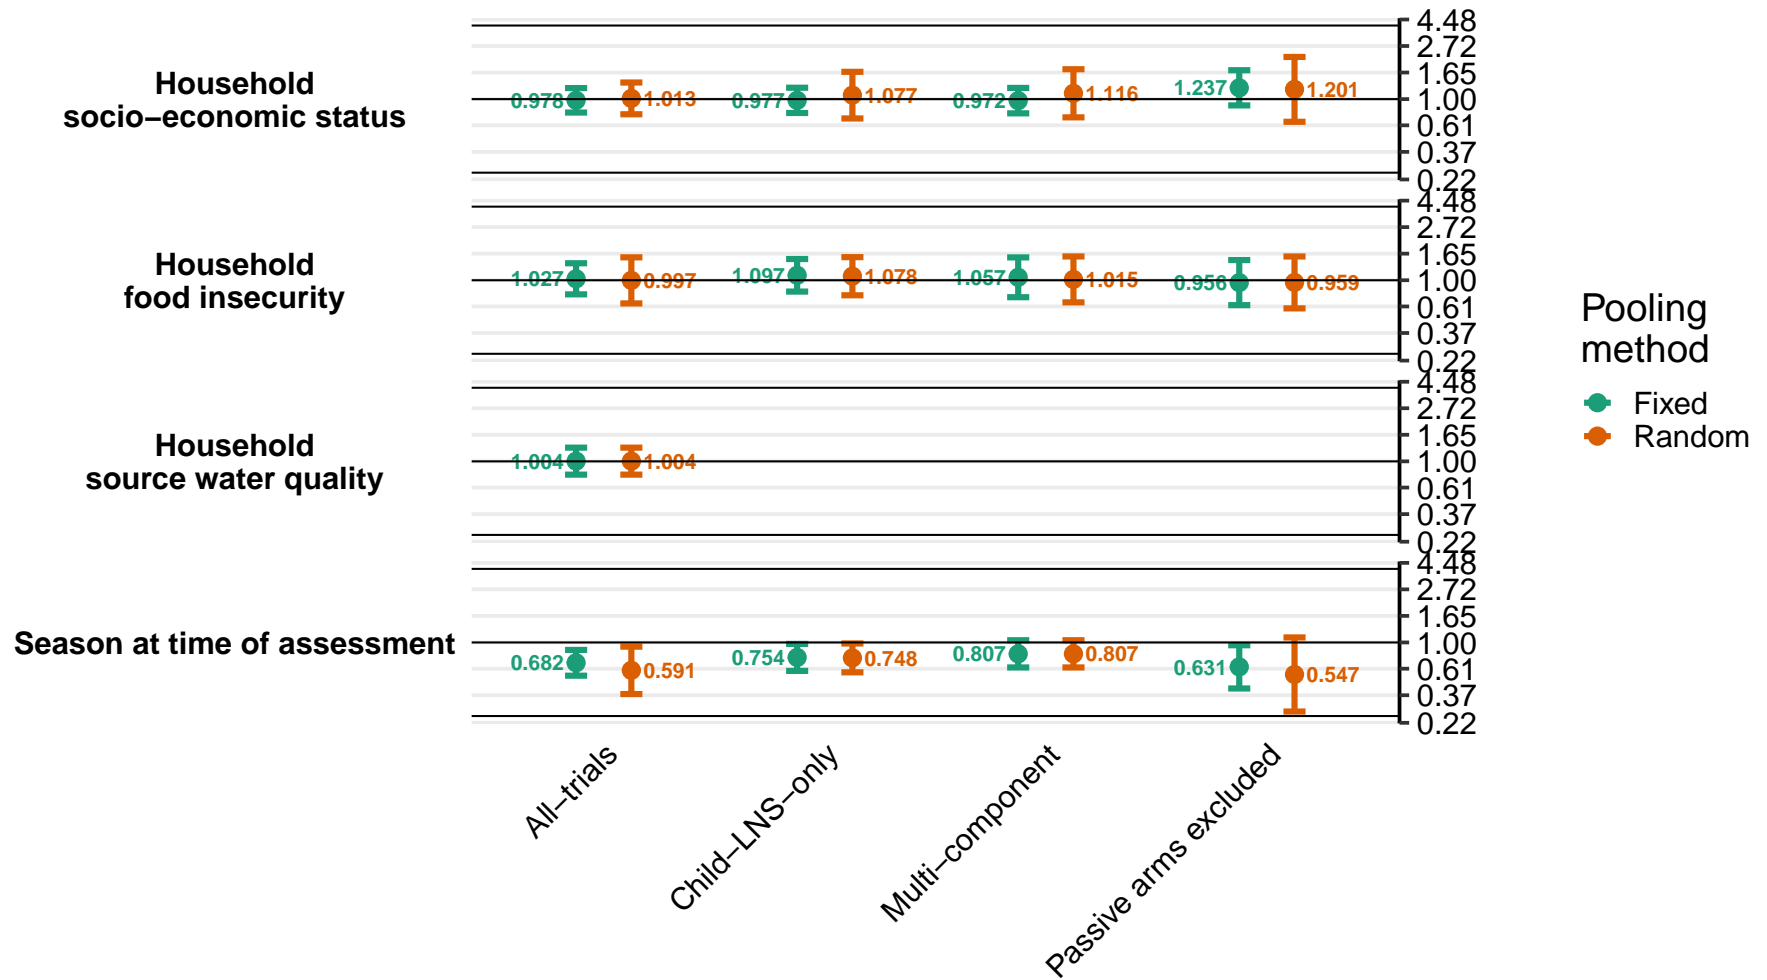

Supplemental figure 8H: Difference in iron deficiency (ferritin < 12 µg/L) prevalence differences  
 8H1: By maternal effect modifiers

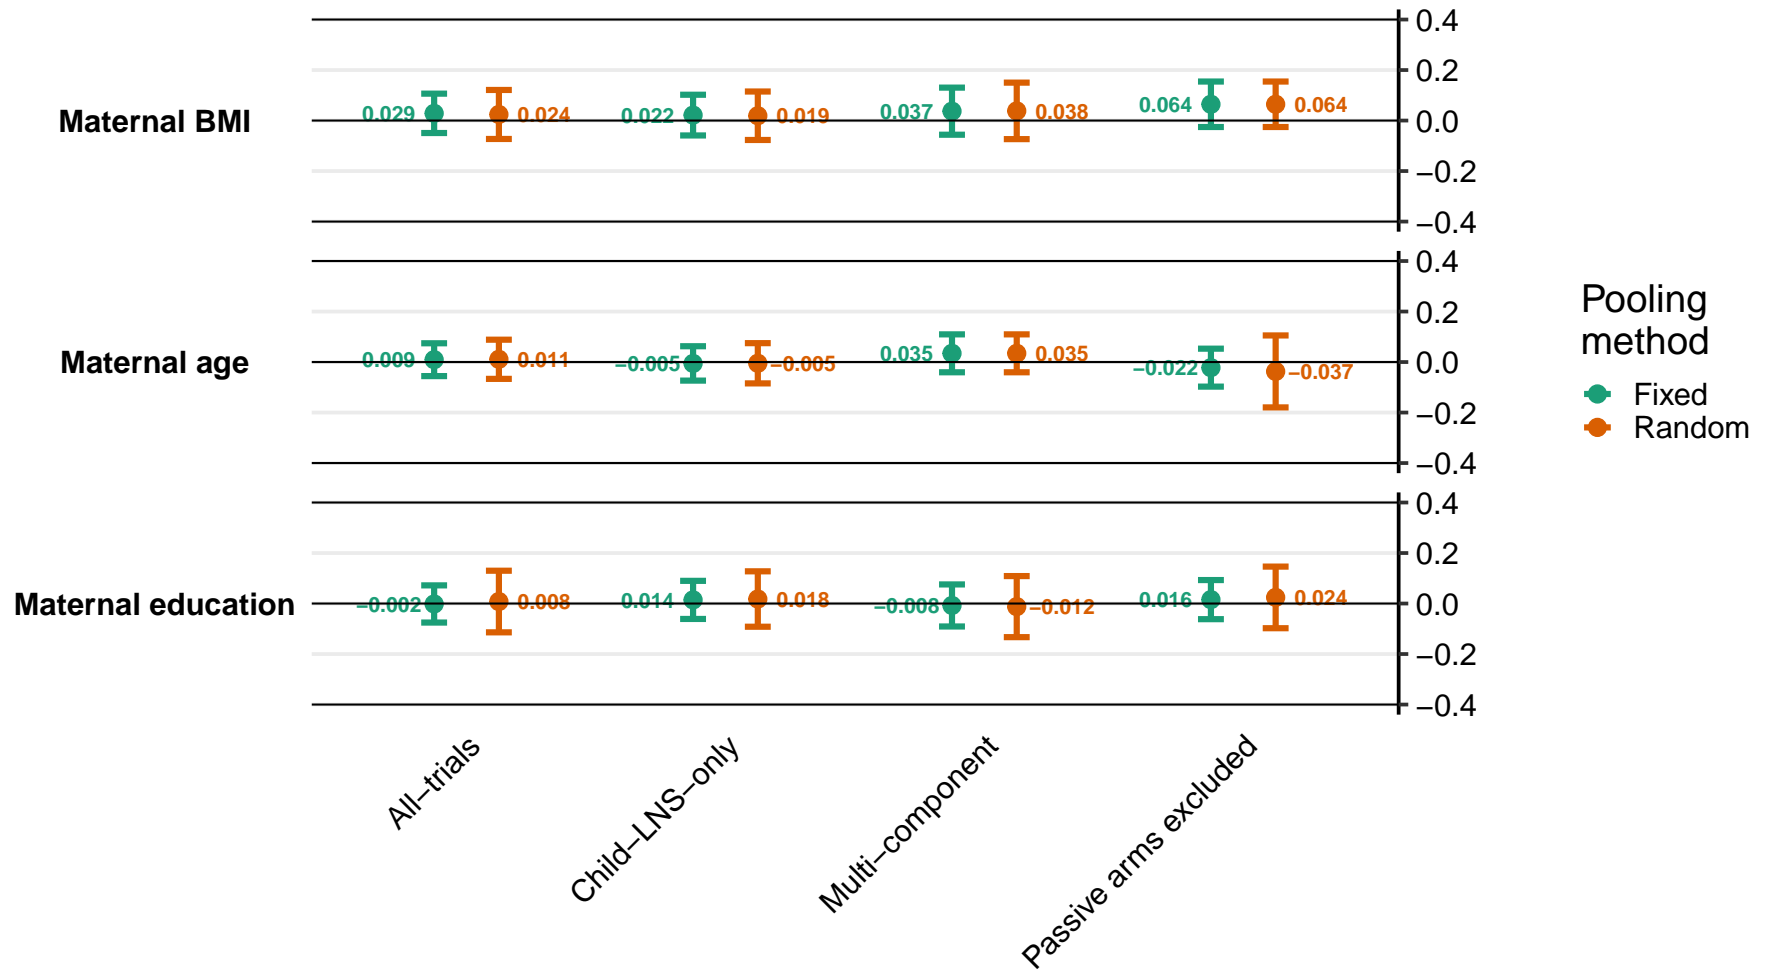

Supplemental figure 8H: Difference in iron deficiency (ferritin < 12 µg/L) prevalence differences

8H2: By child effect modifiers

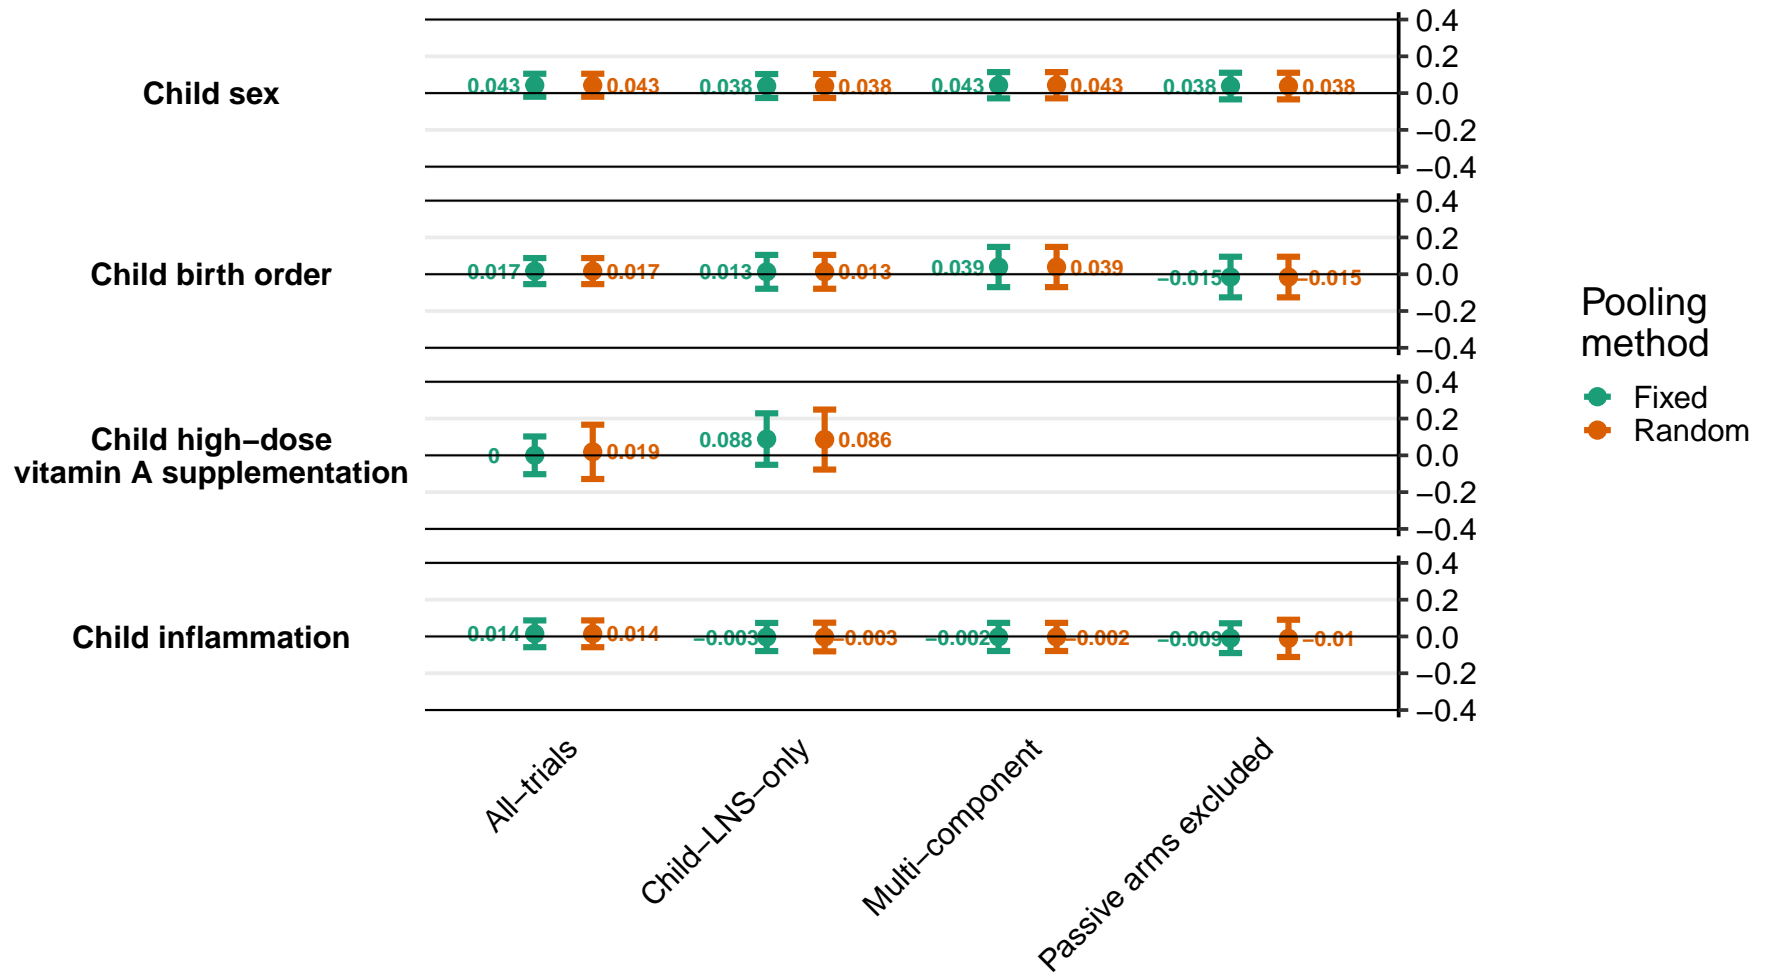

Supplemental figure 8H: Difference in iron deficiency (ferritin < 12 µg/L) prevalence differences

8H3: By household effect modifiers

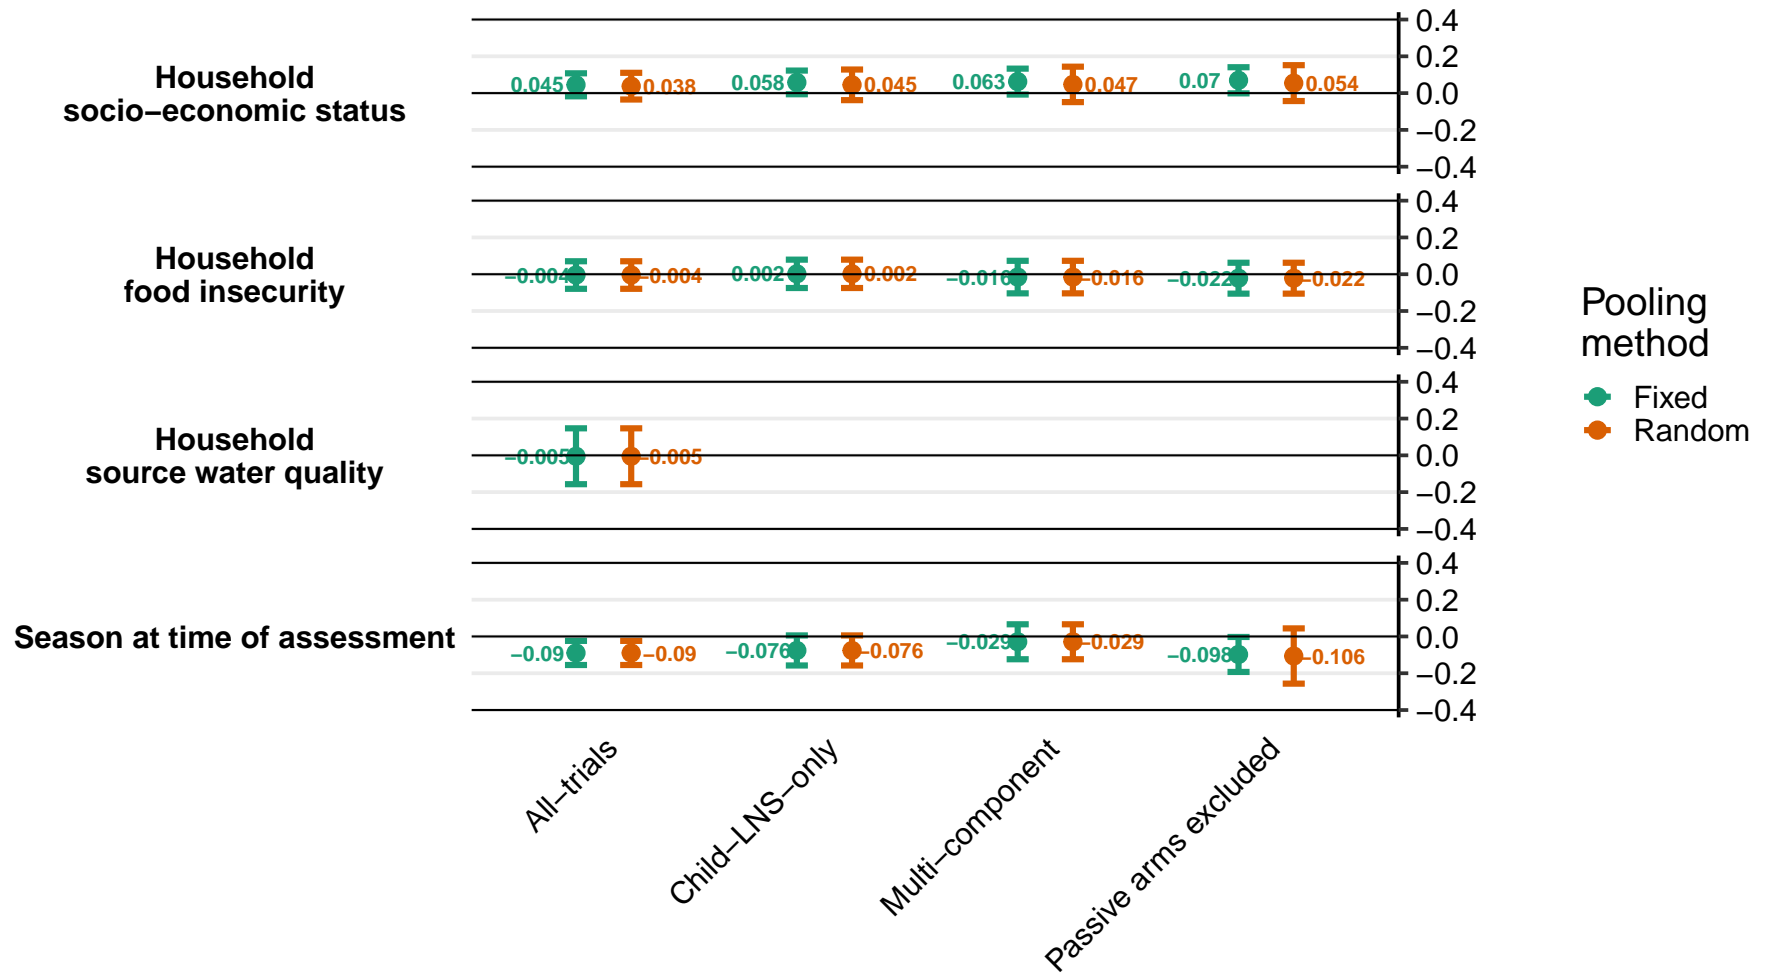

# Supplemental figure 8I: Ratio of iron deficiency anemia prevalence ratios

8I1: By maternal effect modifiers

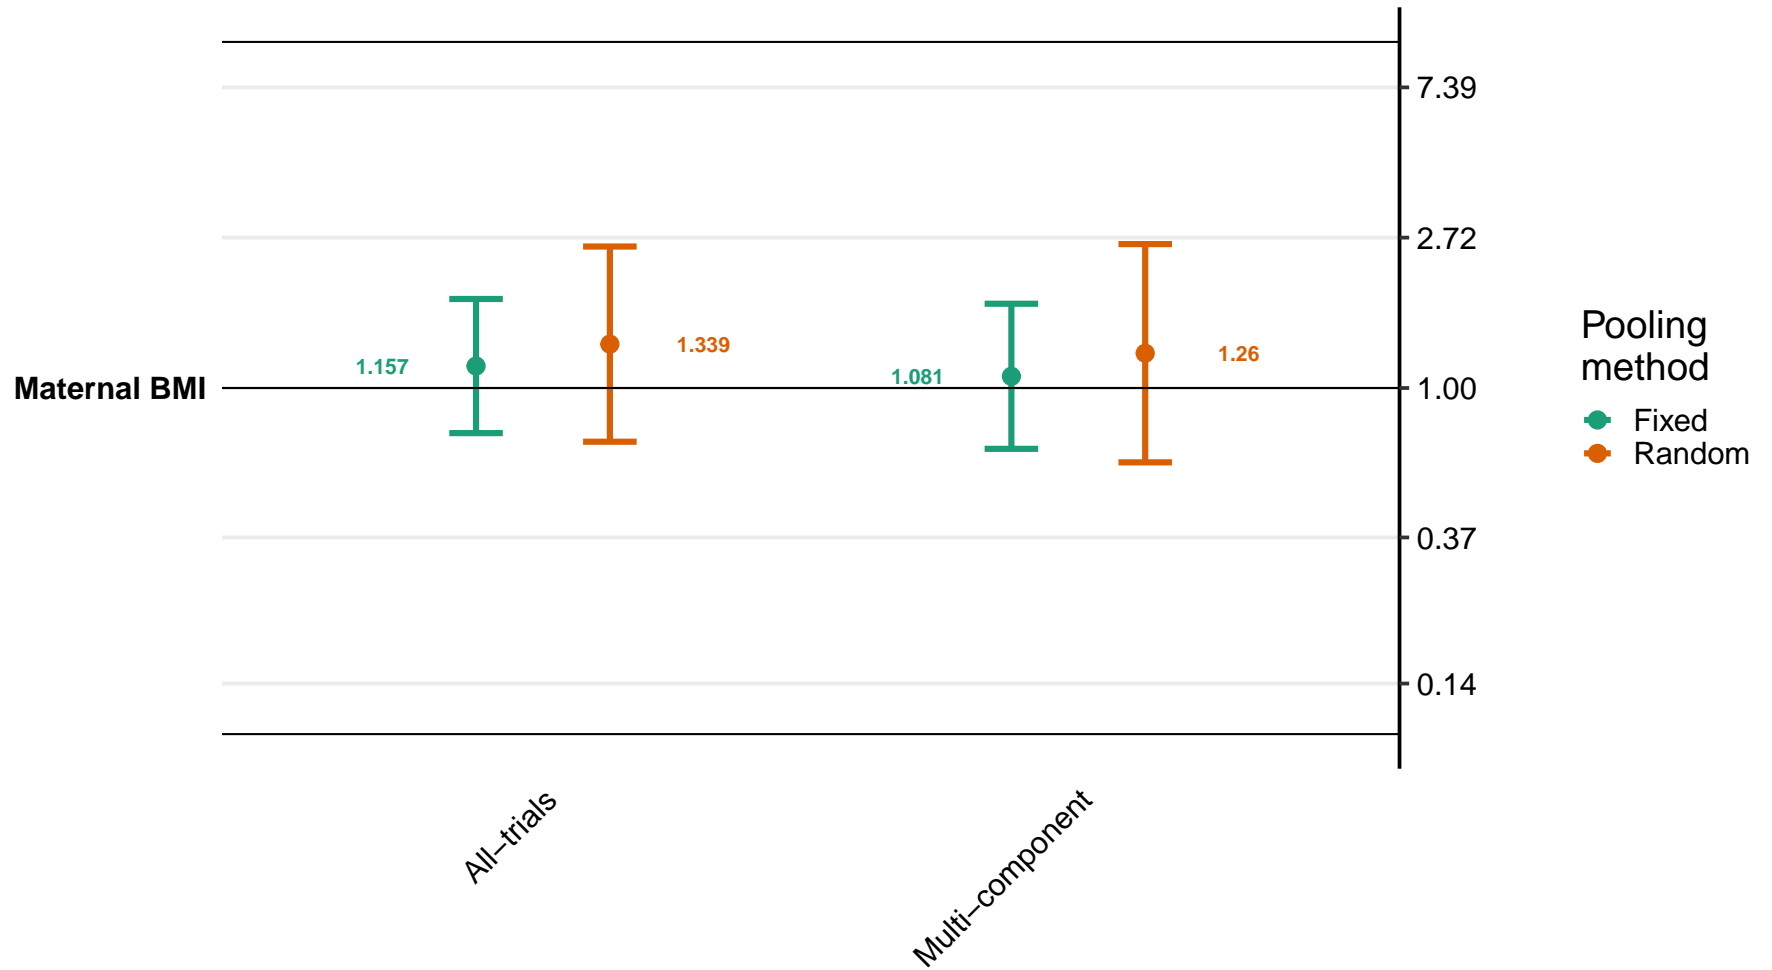



Supplemental figure 8I: Ratio of iron deficiency anemia prevalence ratios

8I2: By child effect modifiers

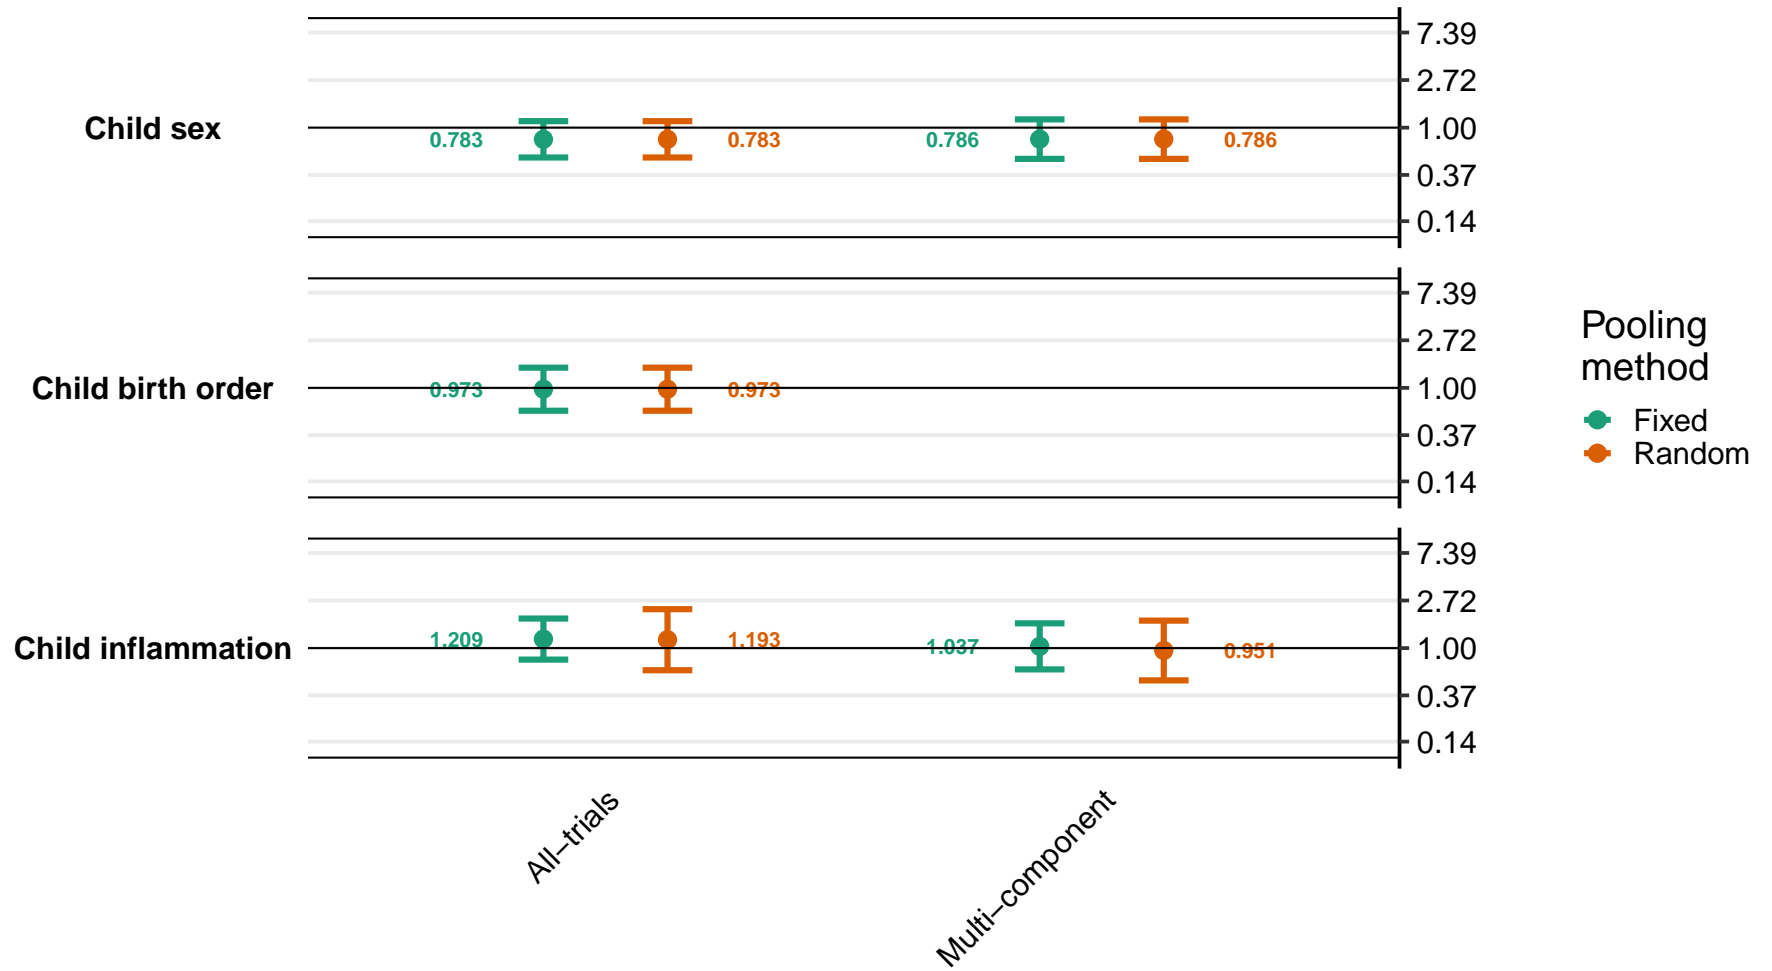

Supplemental figure 8I: Ratio of iron deficiency anemia prevalence ratios

8I3: By household effect modifiers

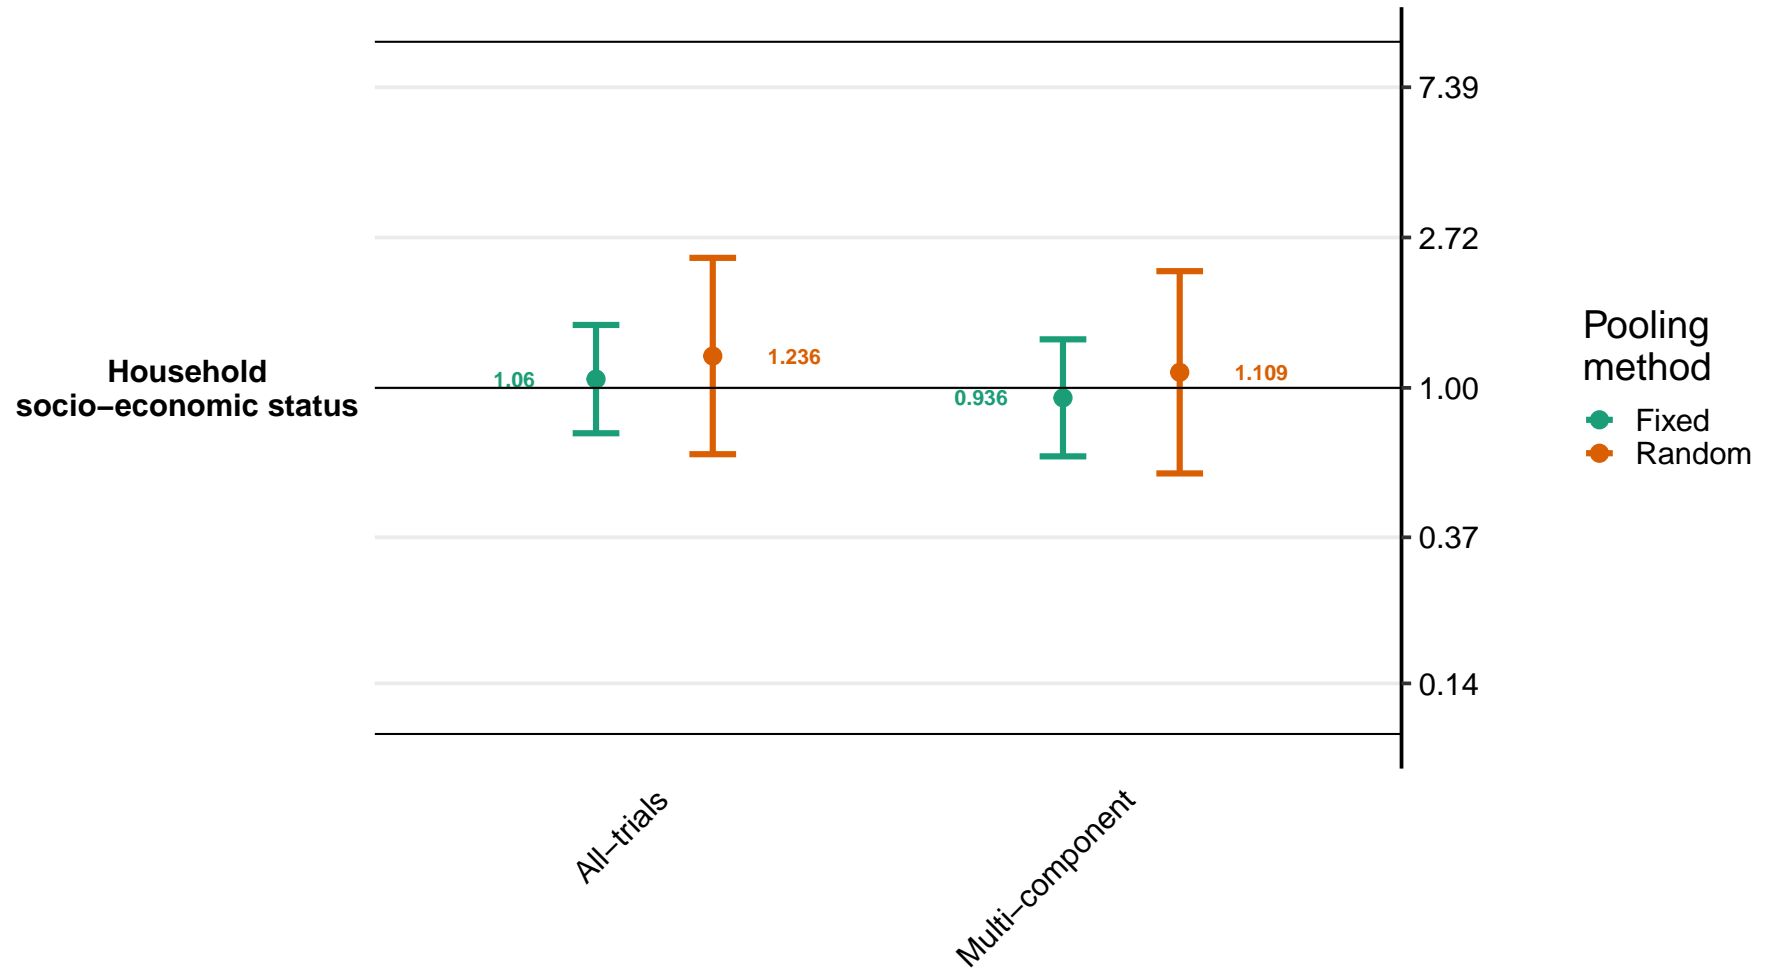

# Supplemental figure 8J: Difference in iron deficiency anemia prevalence differences

8J1: By maternal effect modifiers

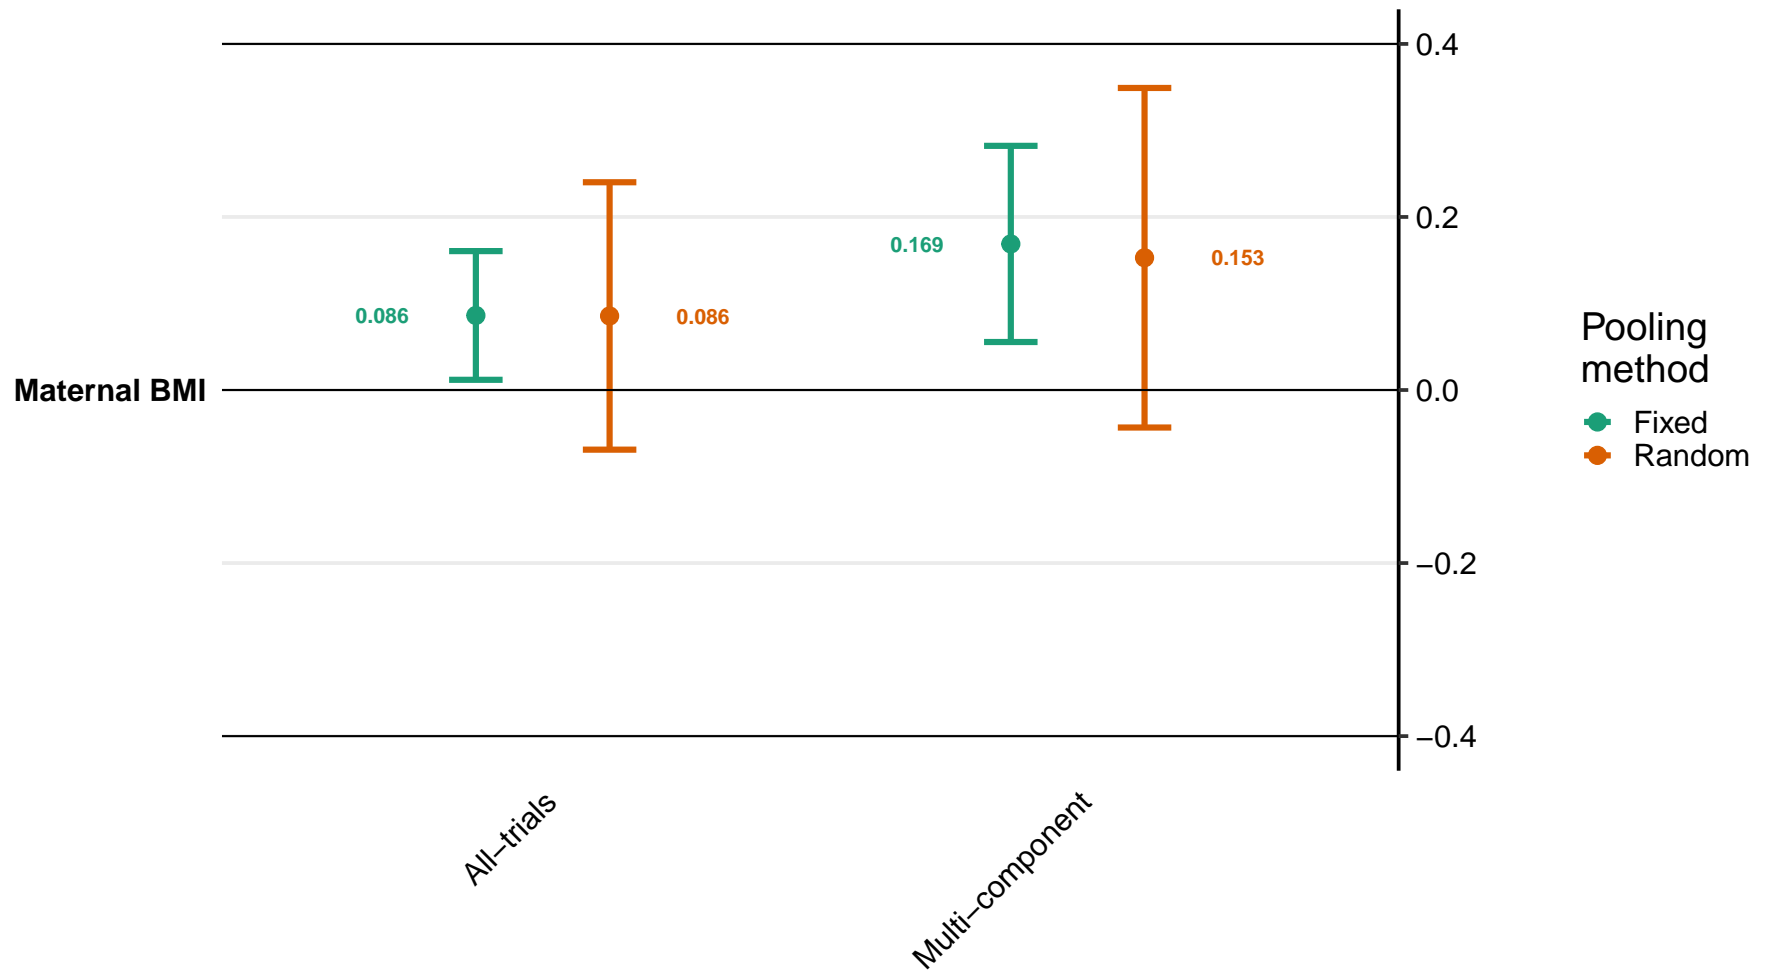

Supplemental figure 8J: Difference in iron deficiency anemia prevalence differences

8J2: By child effect modifiers

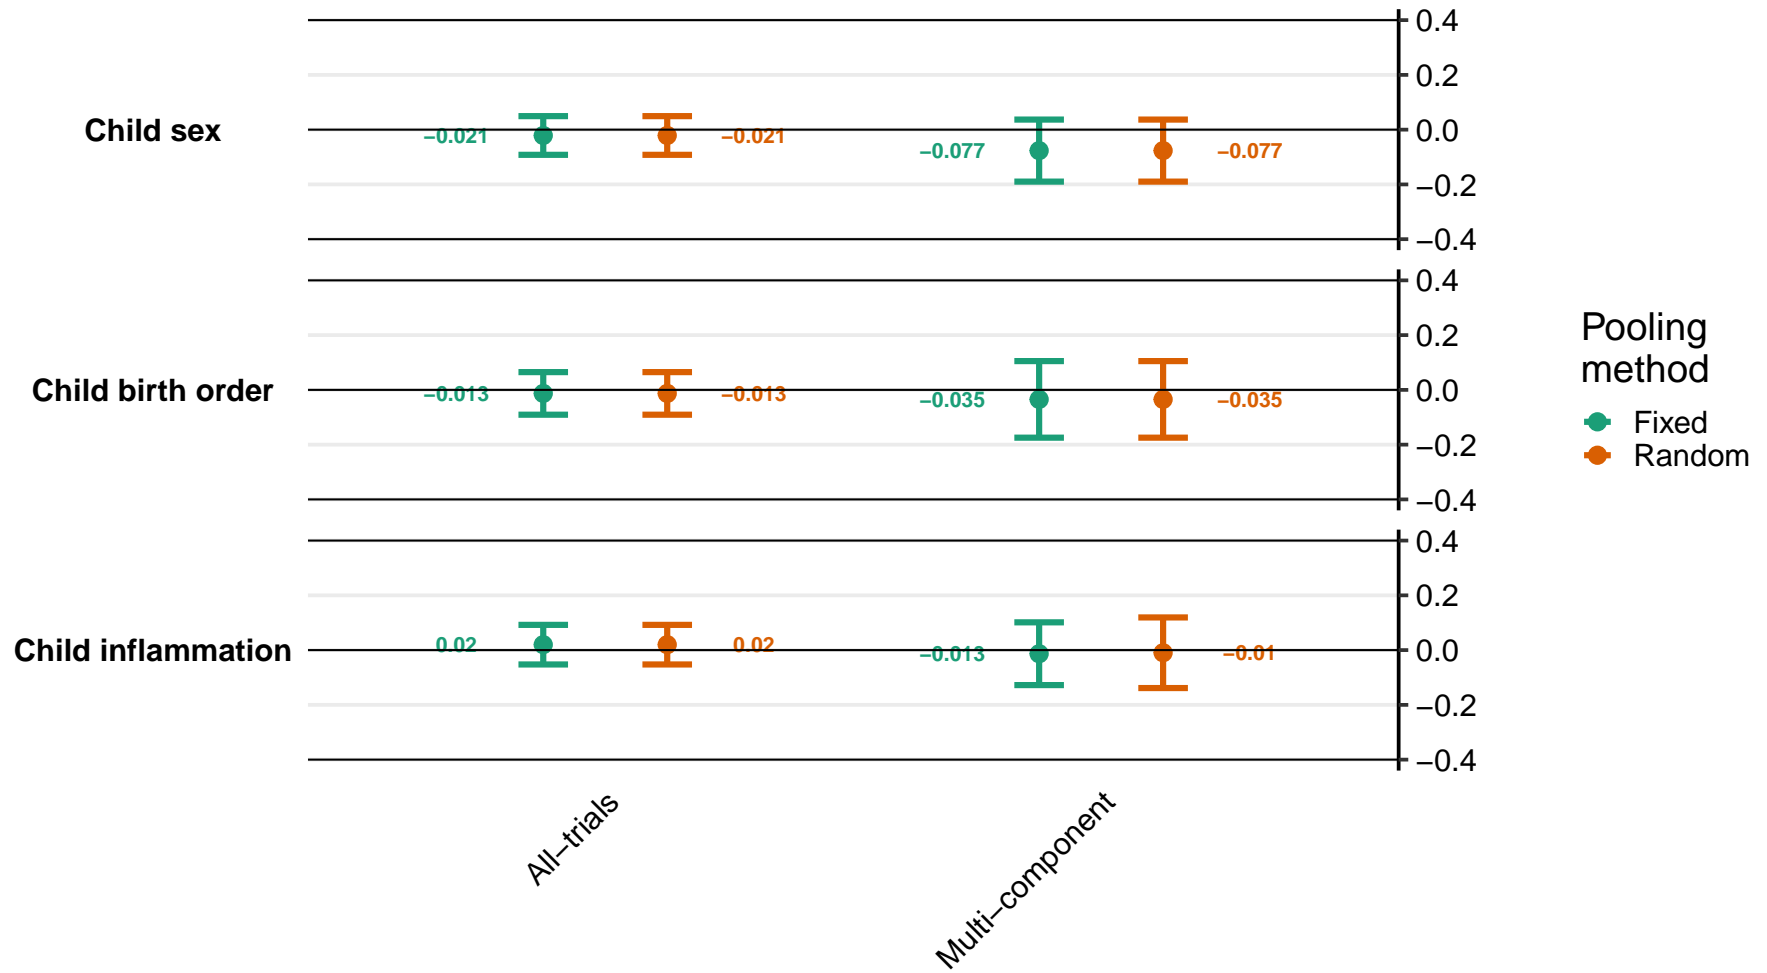

Supplemental figure 8J: Difference in iron deficiency anemia prevalence differences

8J3: By household effect modifiers

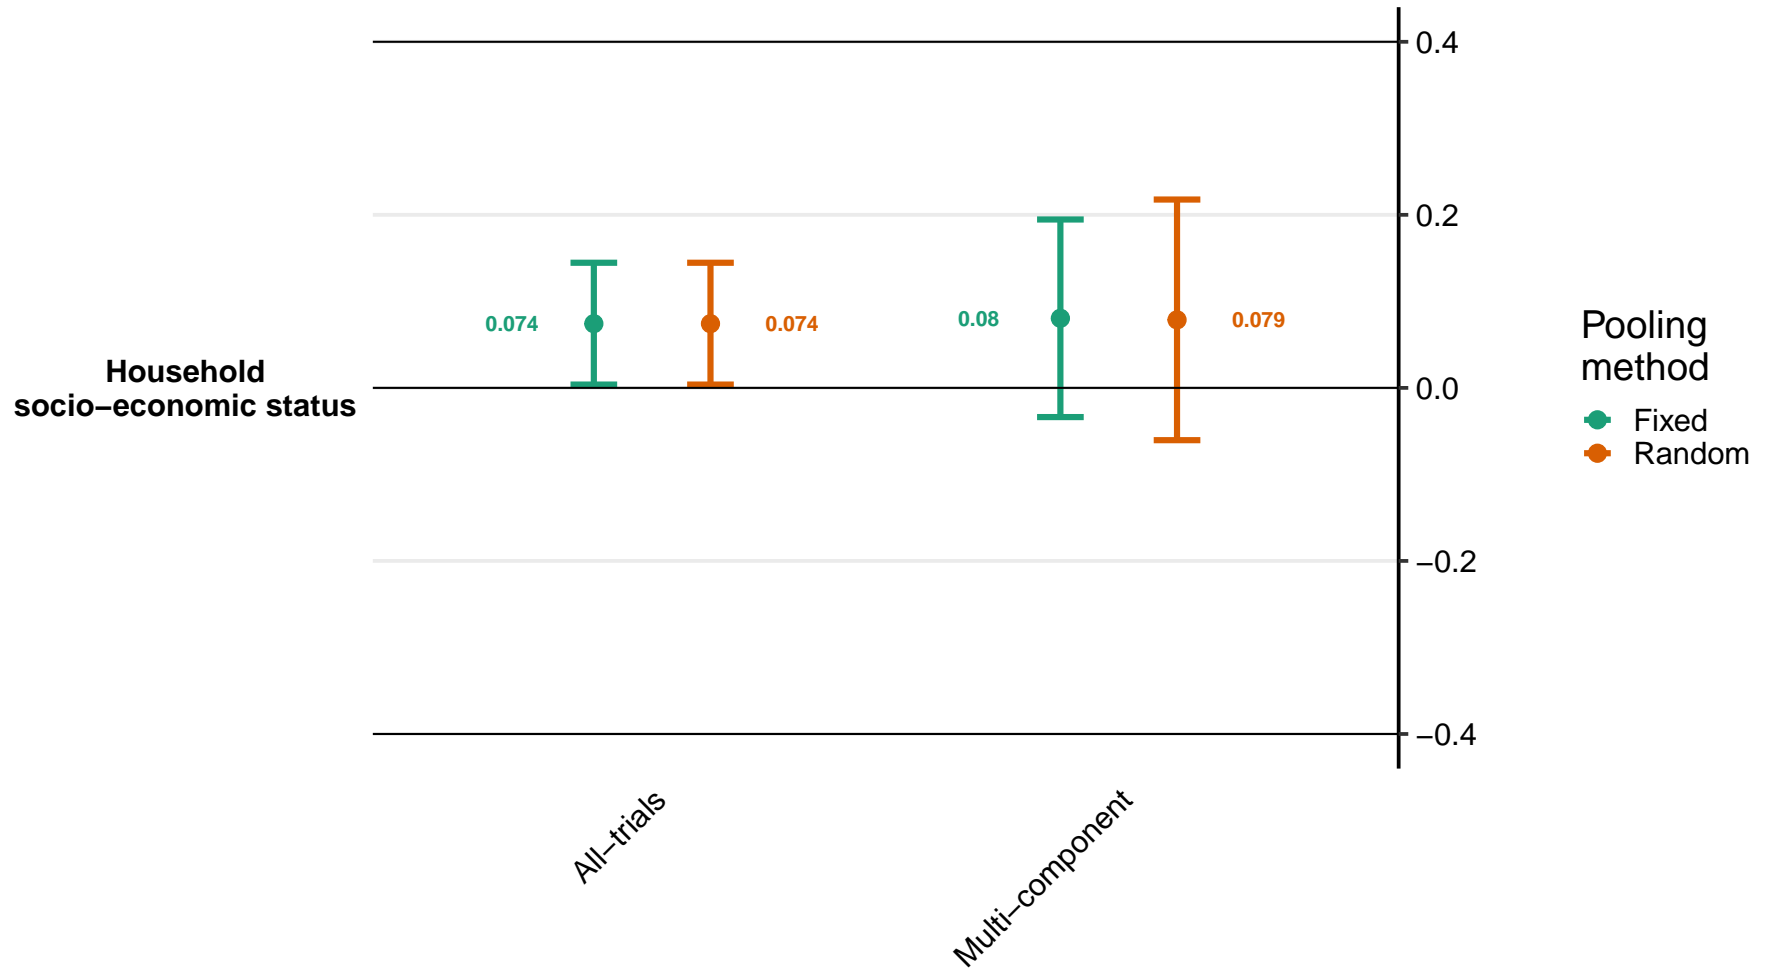

# Supplemental figure 8K: Ratio of geometric mean ratios of soluble transferrin receptor concentration

8K1: By maternal effect modifiers

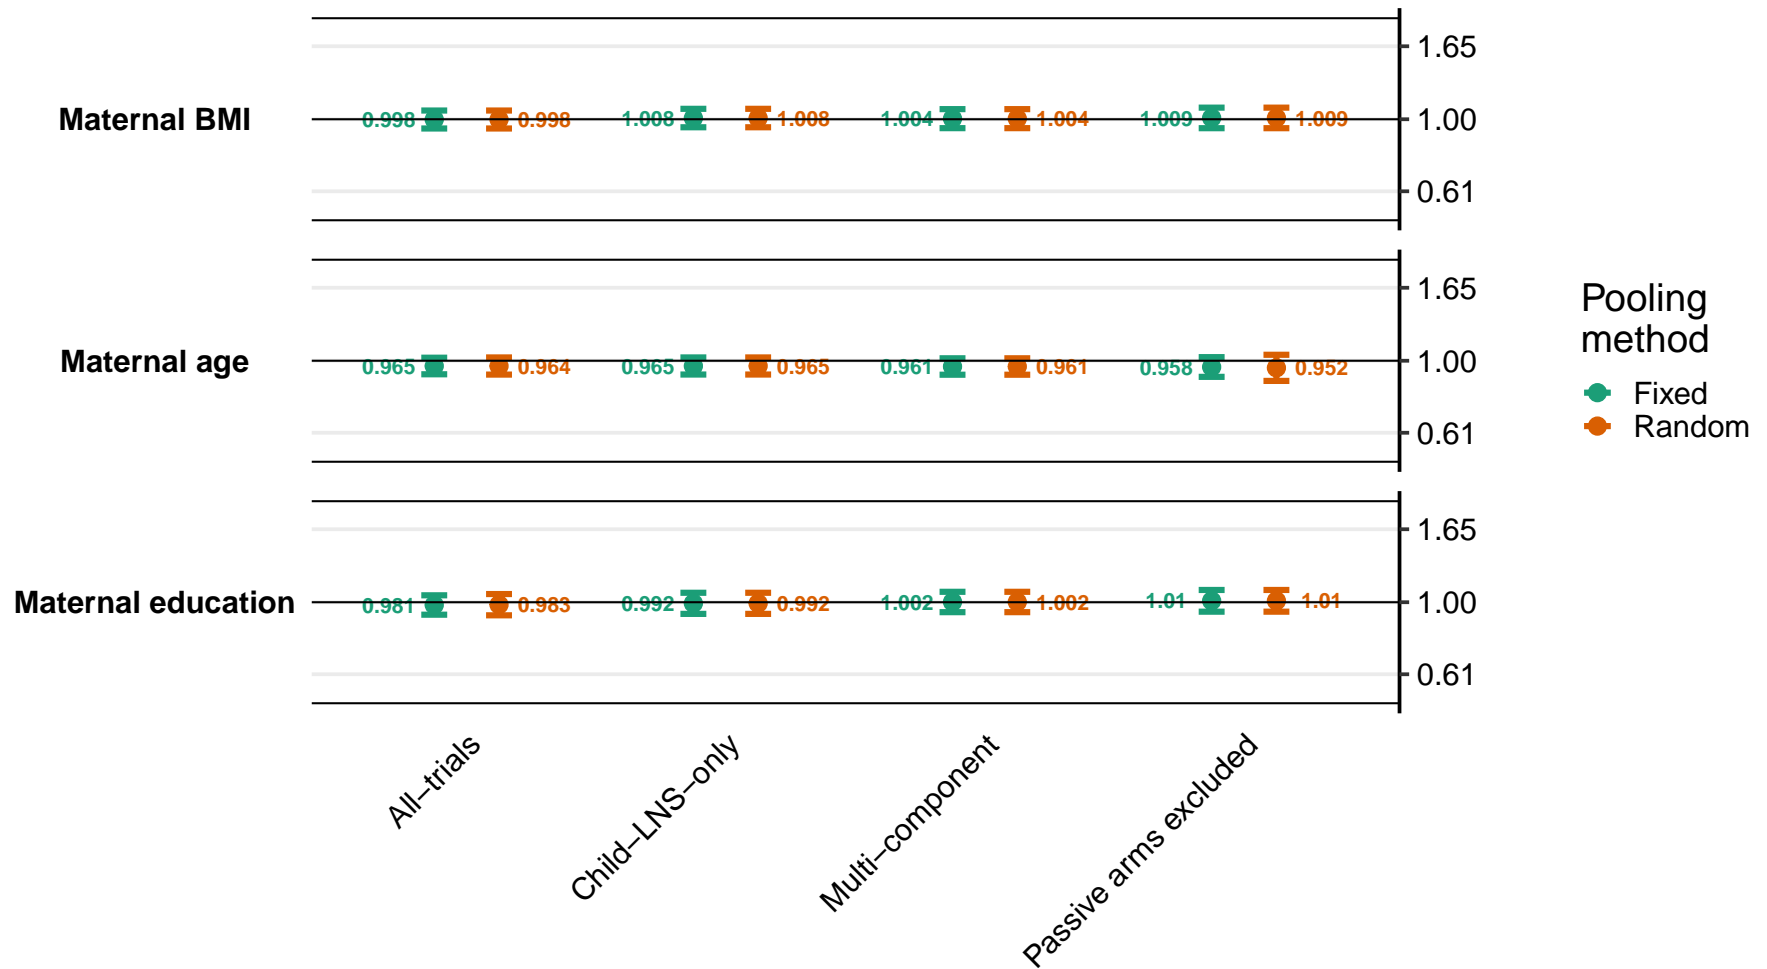

Supplemental figure 8K: Ratio of geometric mean ratios of soluble transferrin receptor concentration

8K2: By child effect modifiers

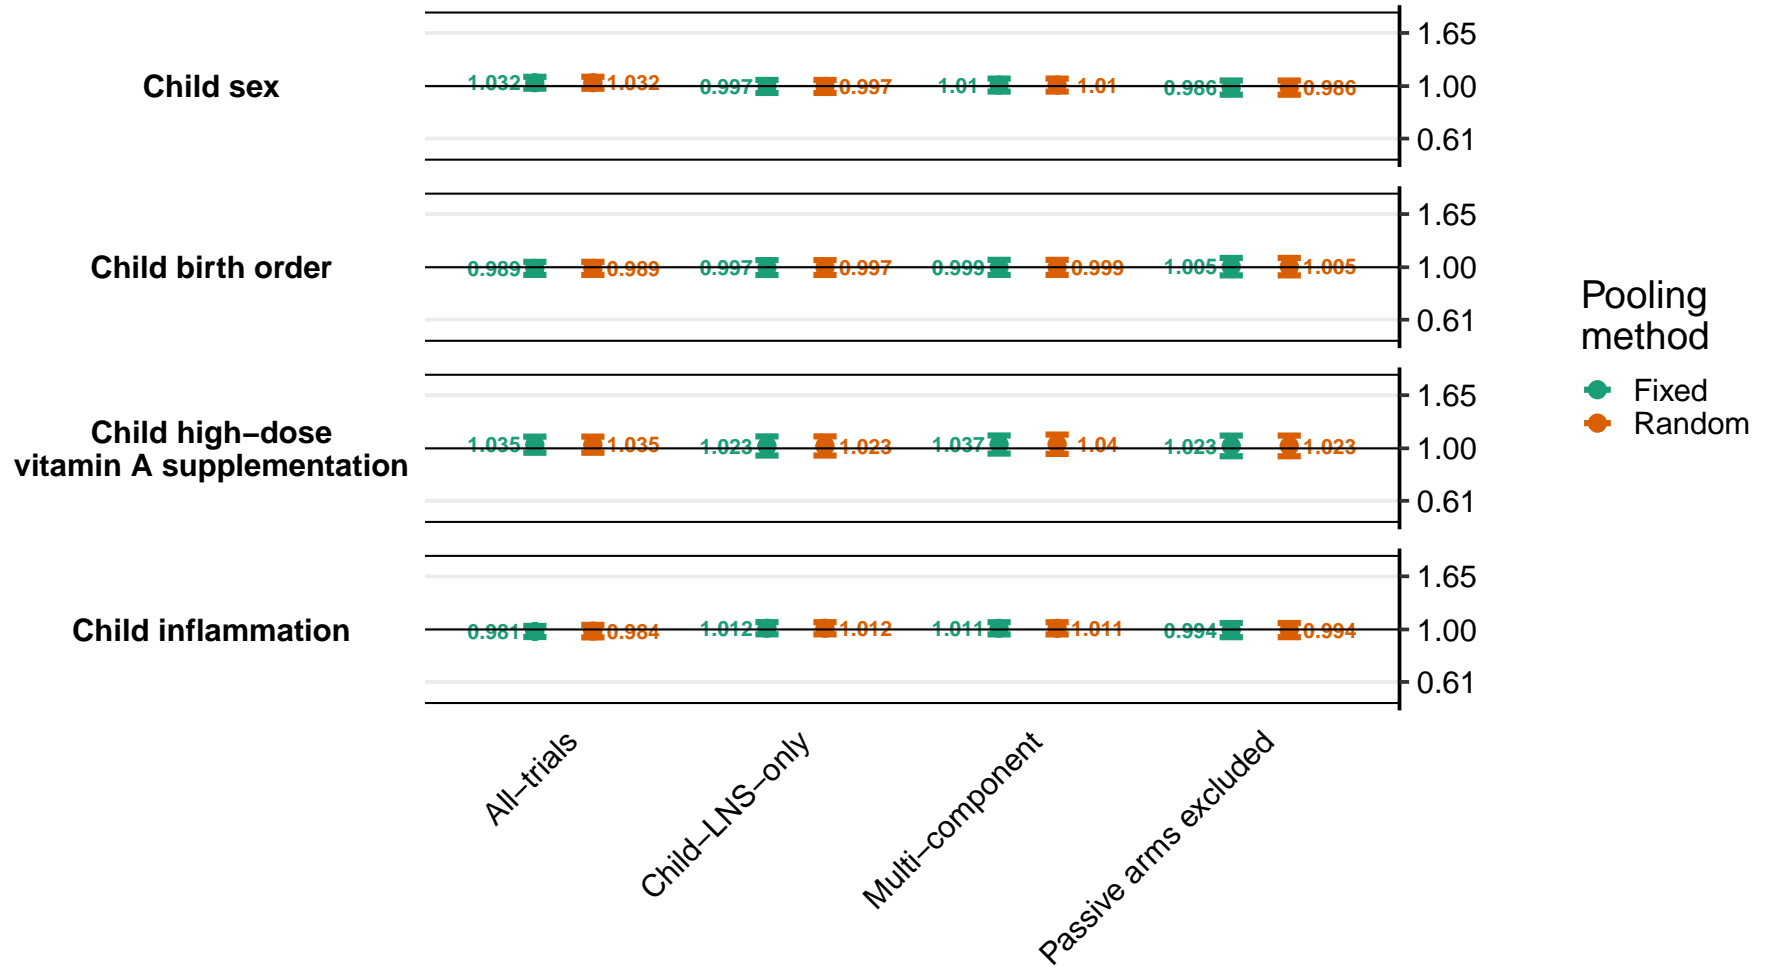

Supplemental figure 8K: Ratio of geometric mean ratios of soluble transferrin receptor concentration

8K3: By household effect modifiers

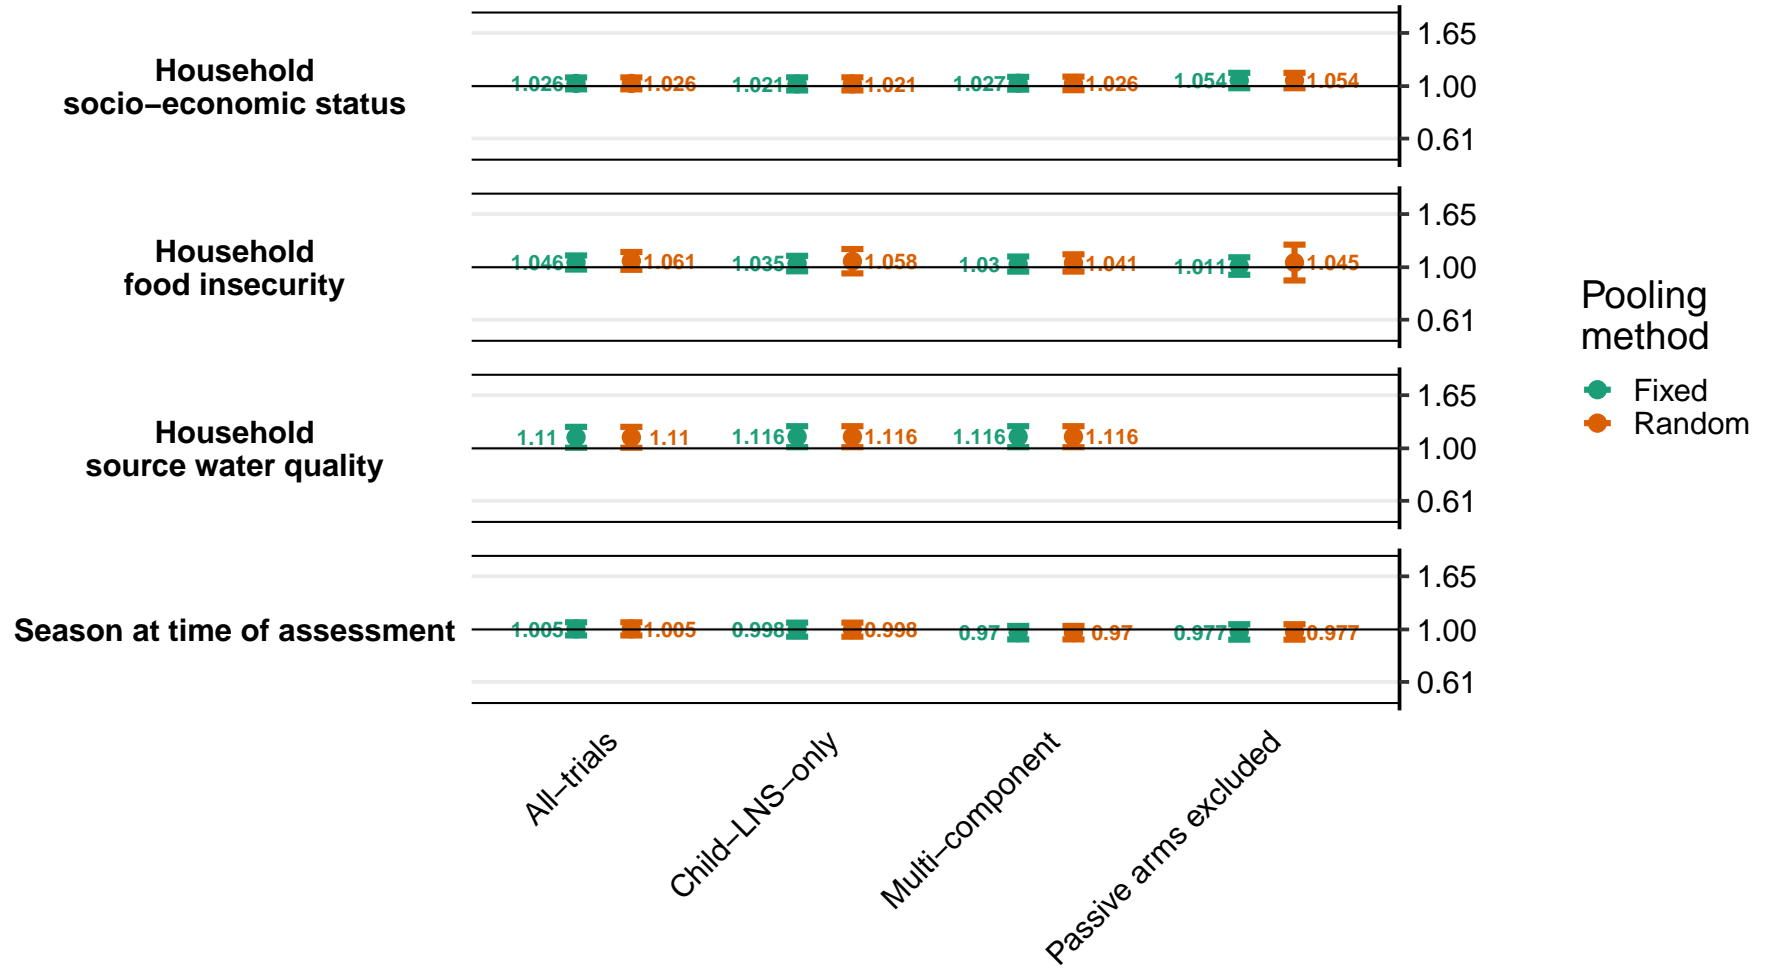



# Supplemental figure 8L: Ratio of elevated soluble transferrin receptor prevalence ratios

8L1: By maternal effect modifiers

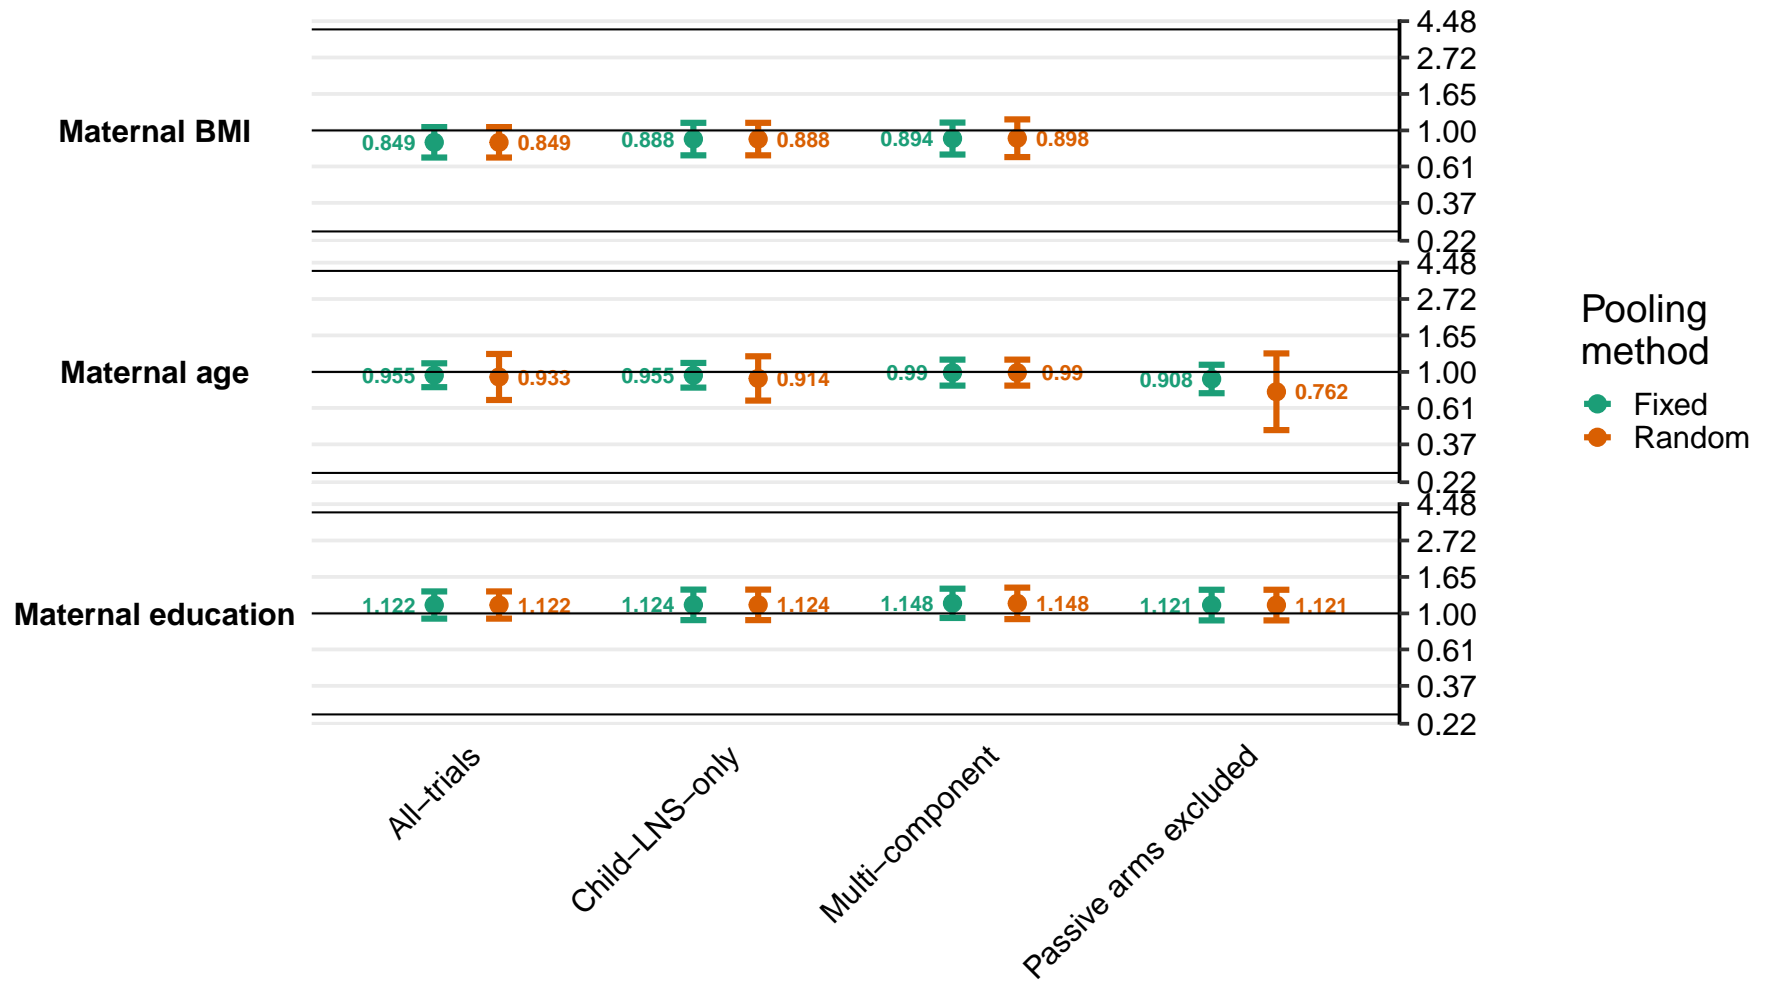

Supplemental figure 8L: Ratio of elevated soluble transferrin receptor prevalence ratios

8L2: By child effect modifiers

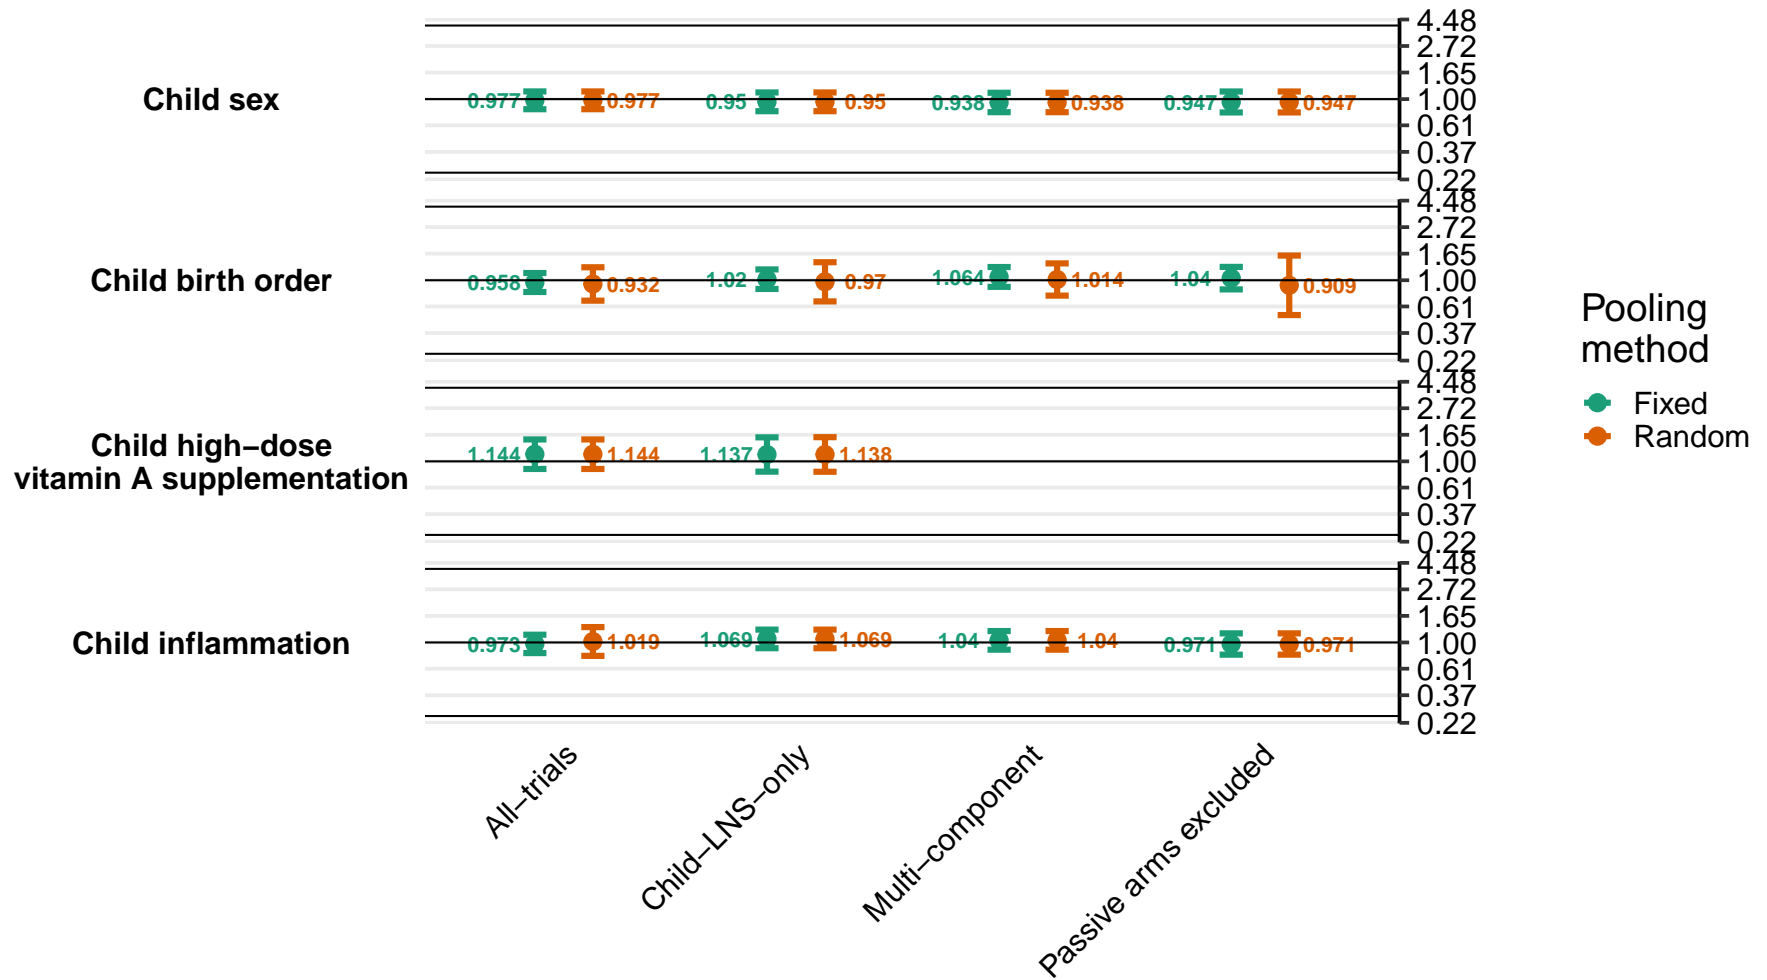

Supplemental figure 8L: Ratio of elevated soluble transferrin receptor prevalence ratios

8L3: By household effect modifiers

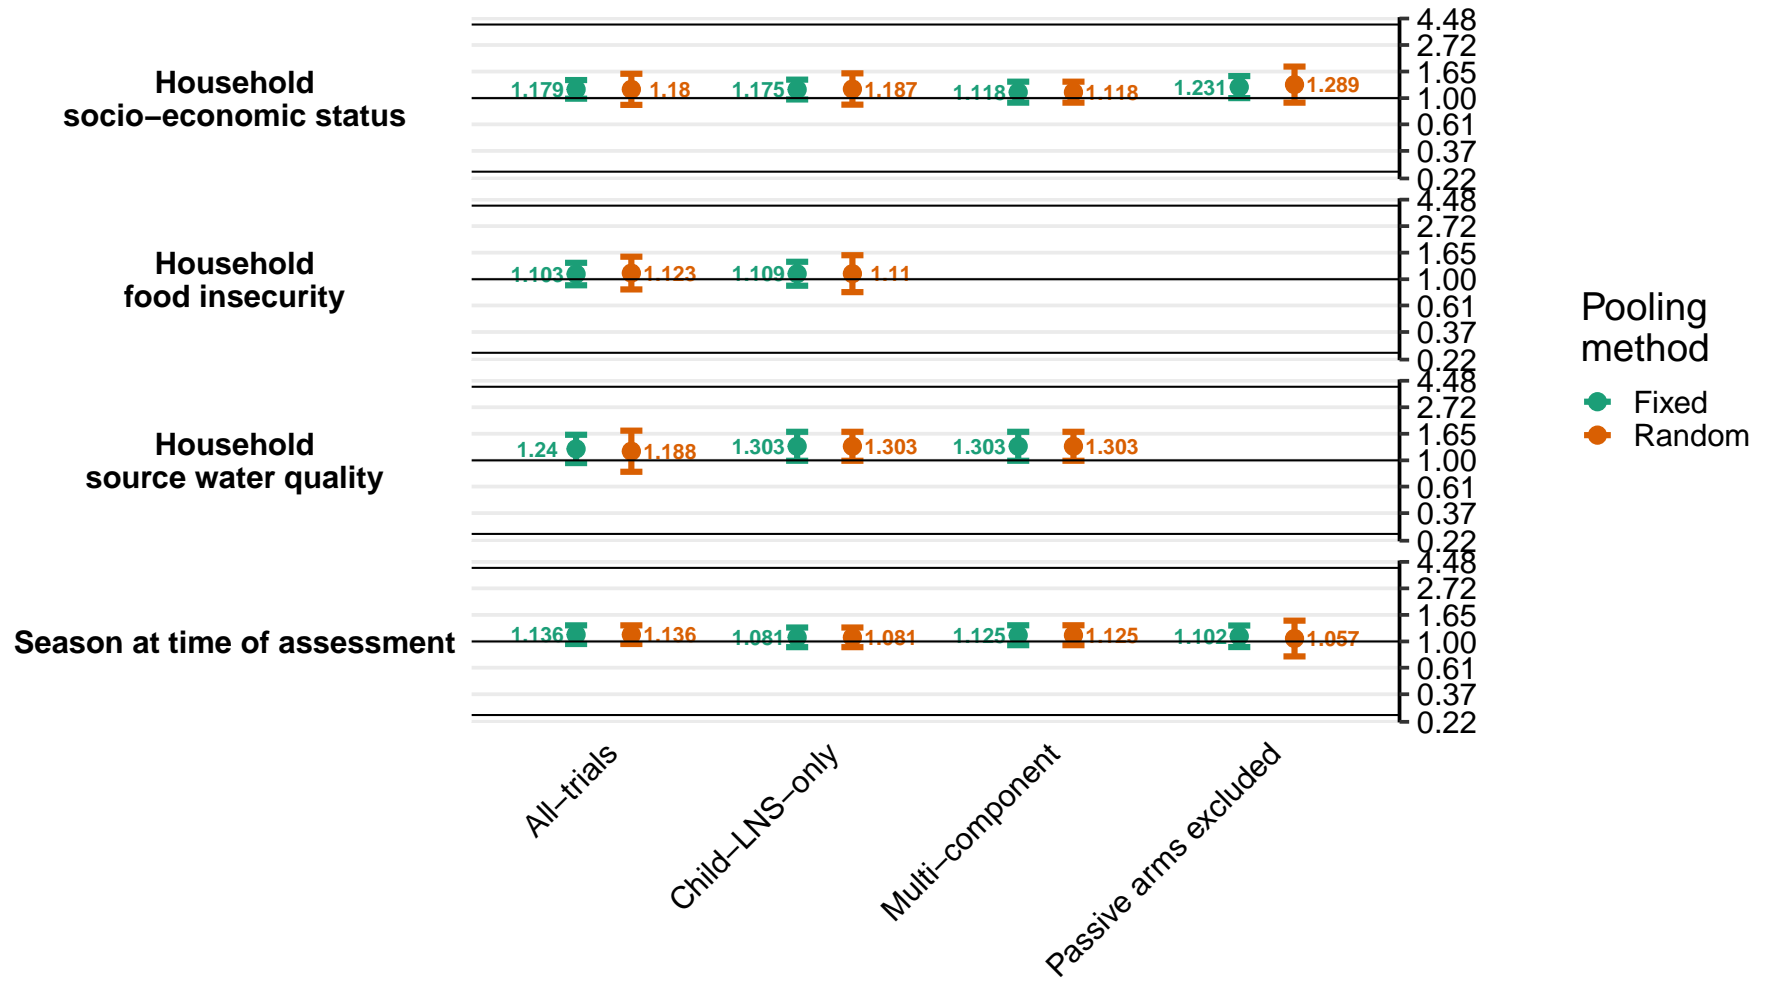

# Supplemental figure 8M: Difference in elevated soluble transferrin receptor prevalence differences

8M1: By maternal effect modifiers

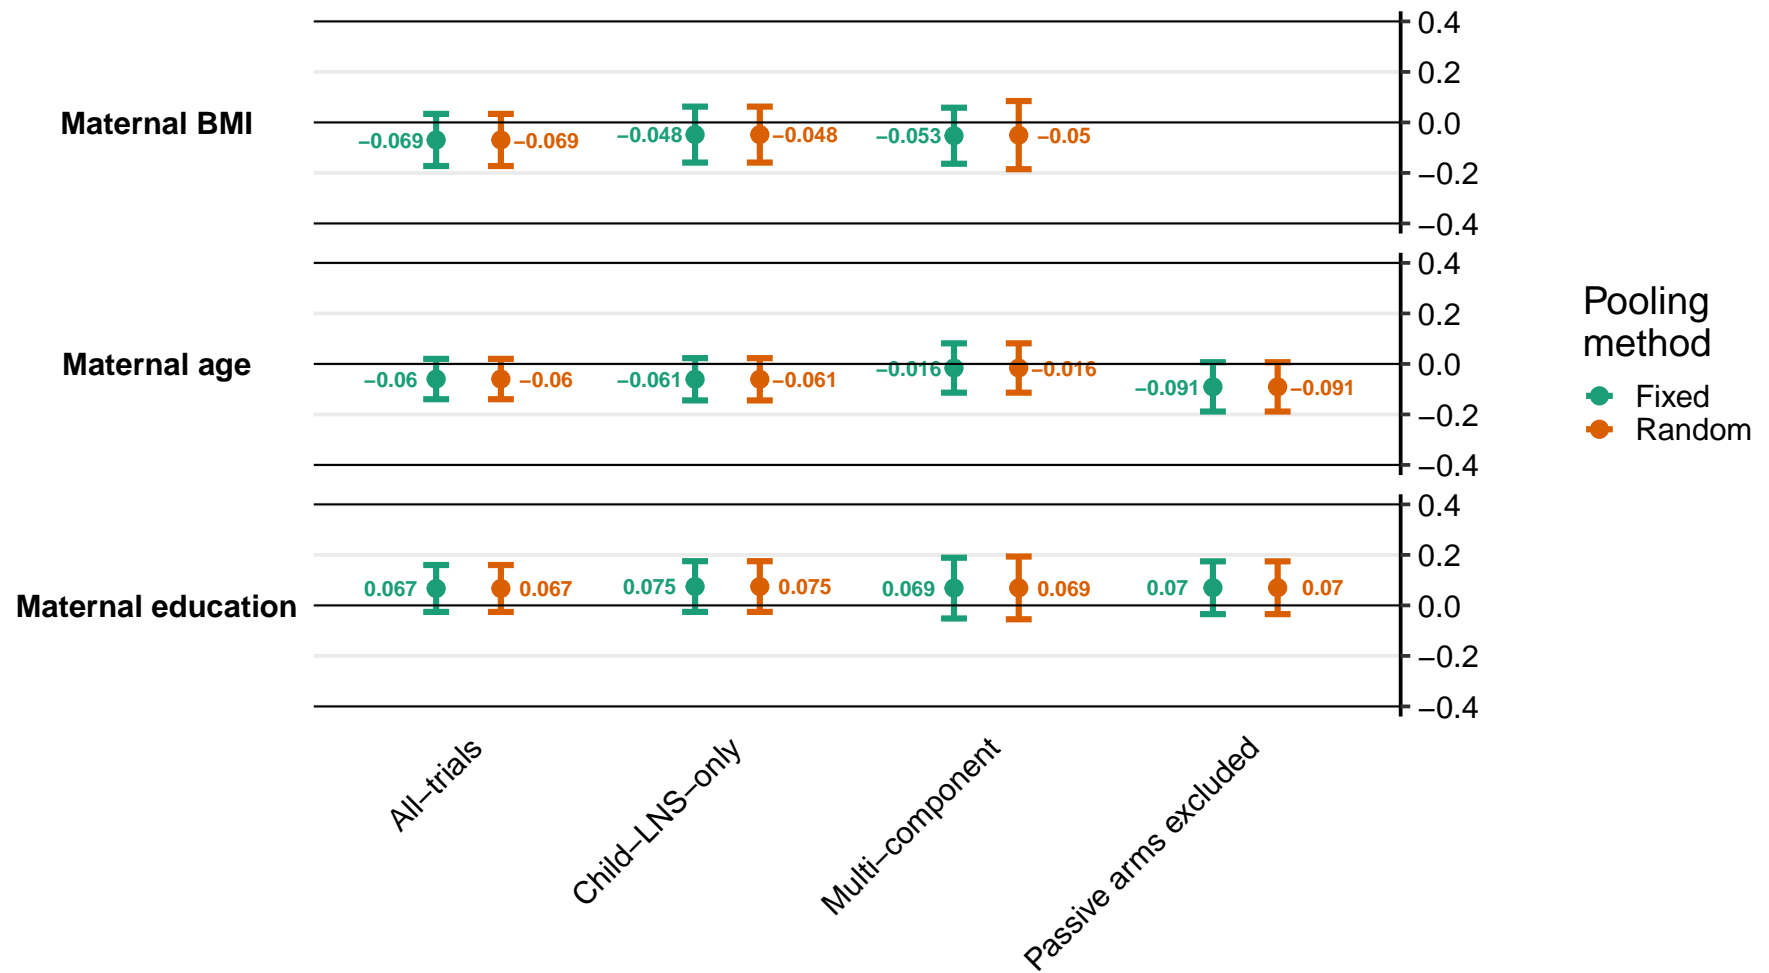

Supplemental figure 8M: Difference in elevated soluble transferrin receptor prevalence differences

8M2: By child effect modifiers

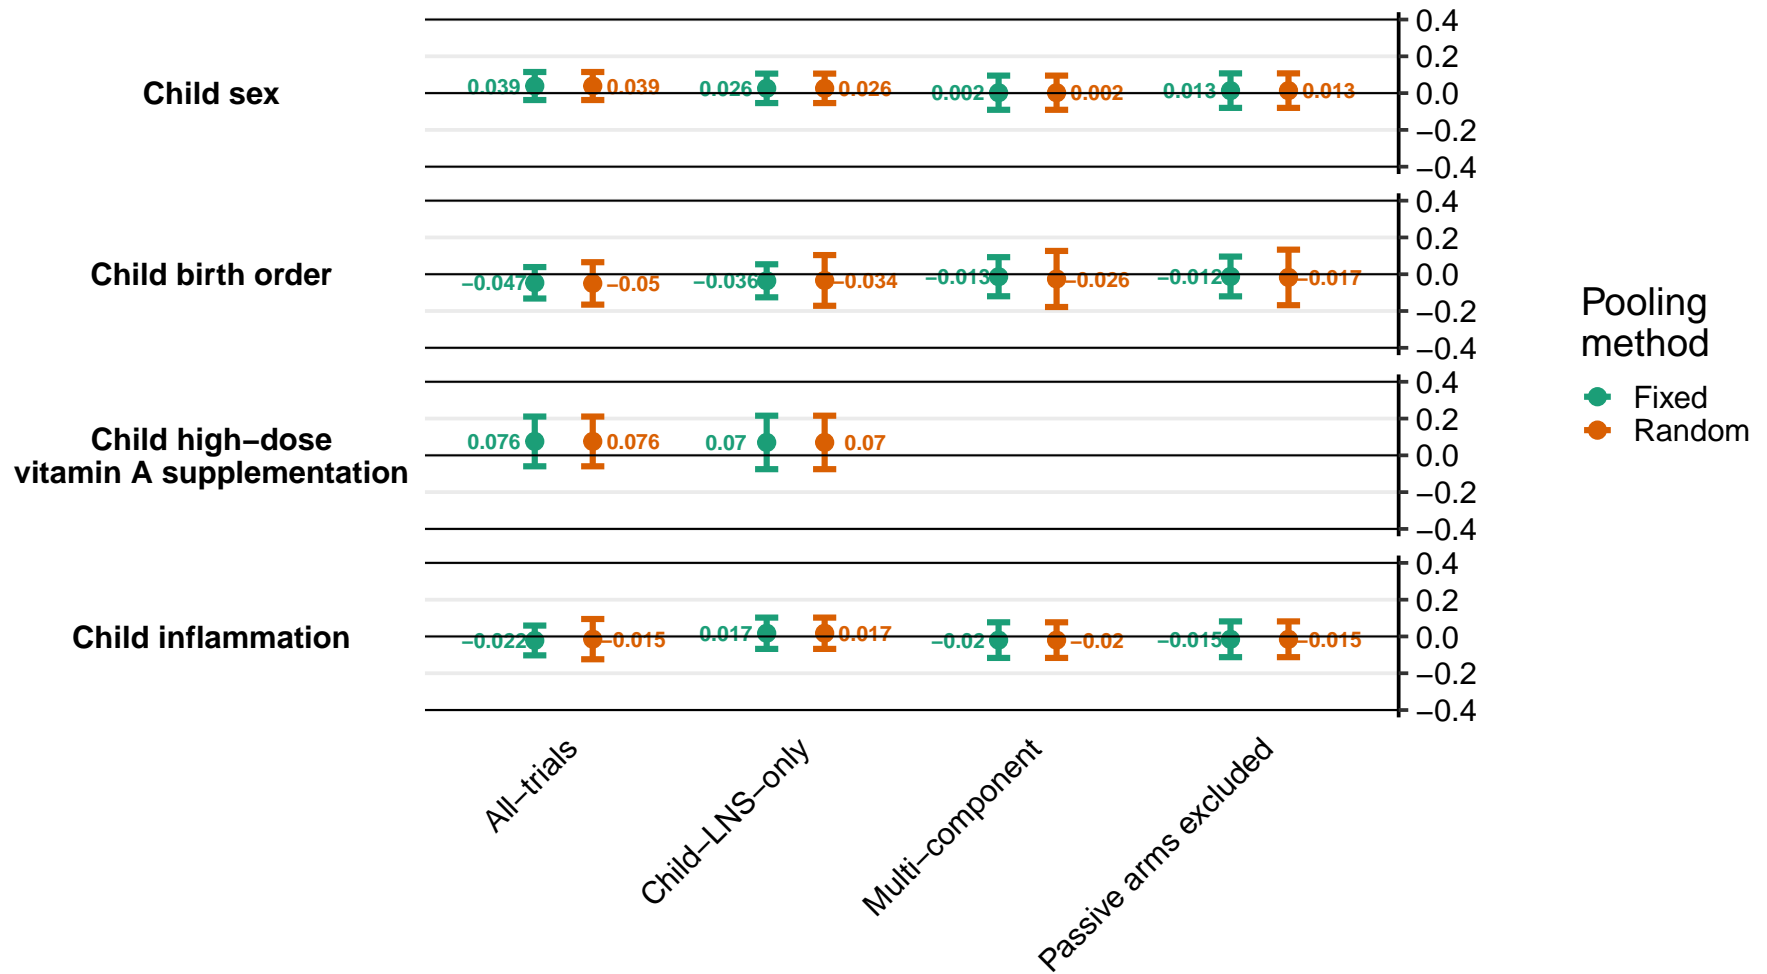

Supplemental figure 8M: Difference in elevated soluble transferrin receptor prevalence differences

8M3: By household effect modifiers

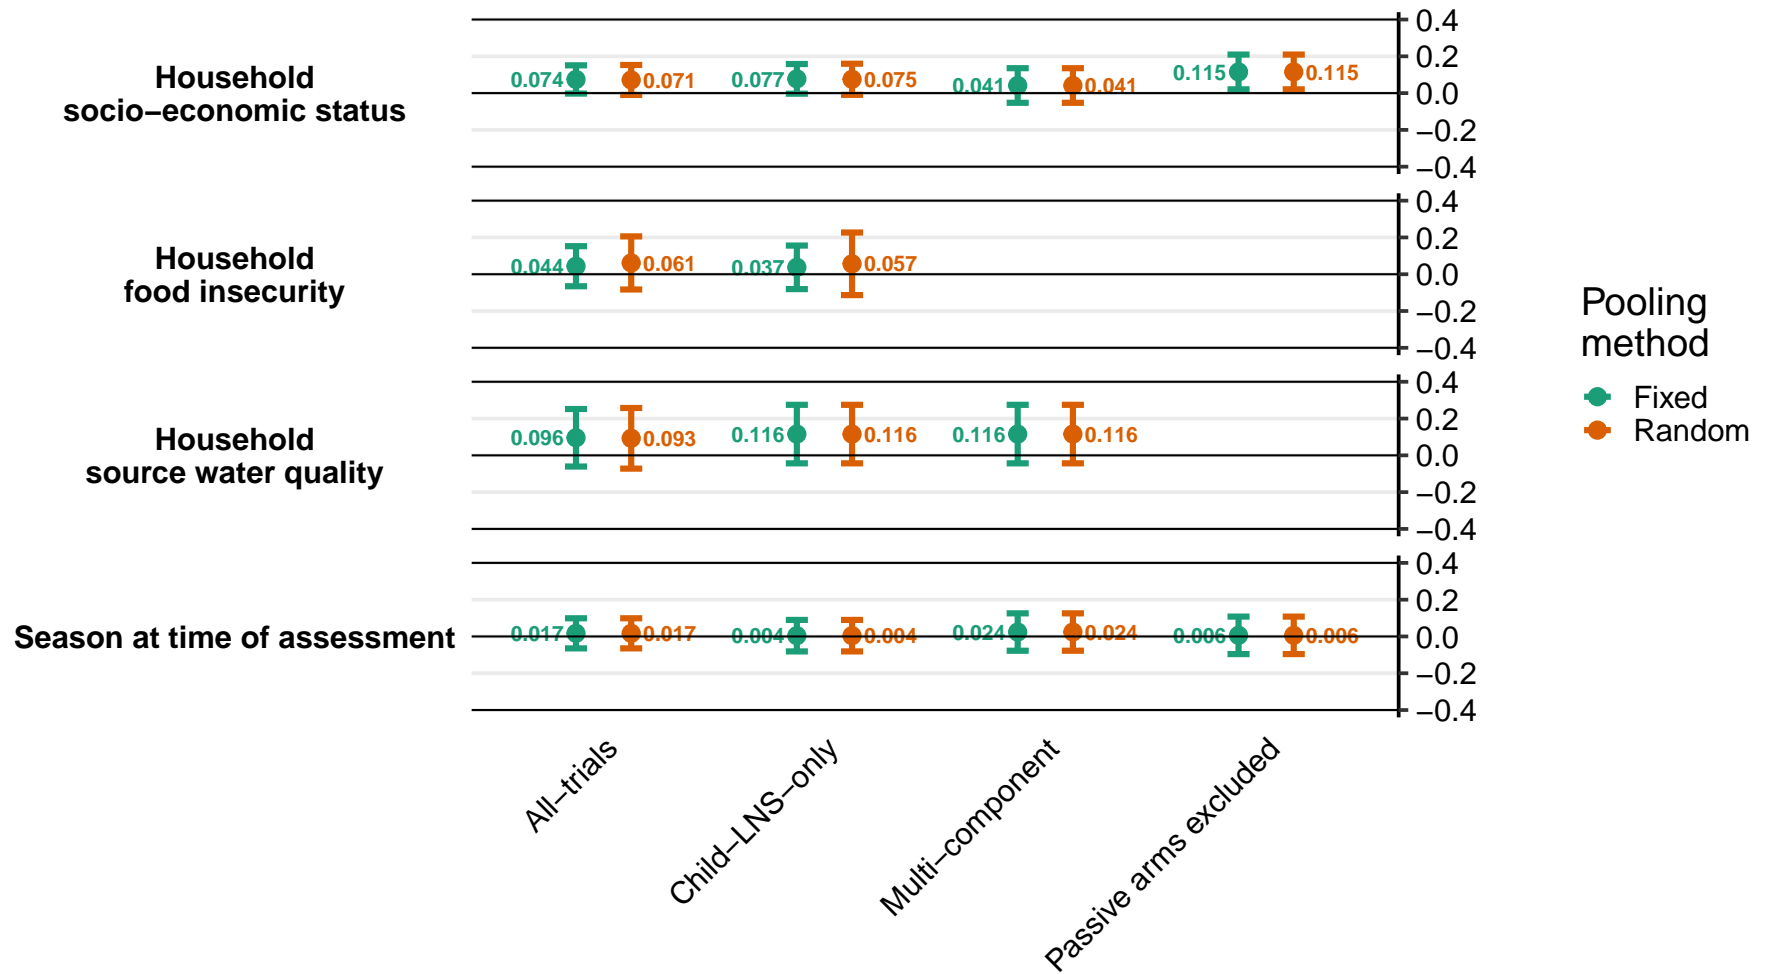

Supplemental figure 8N: Ratio of geometric mean ratios of zinc protoporphyrin concentration  
 8N1: By maternal effect modifiers

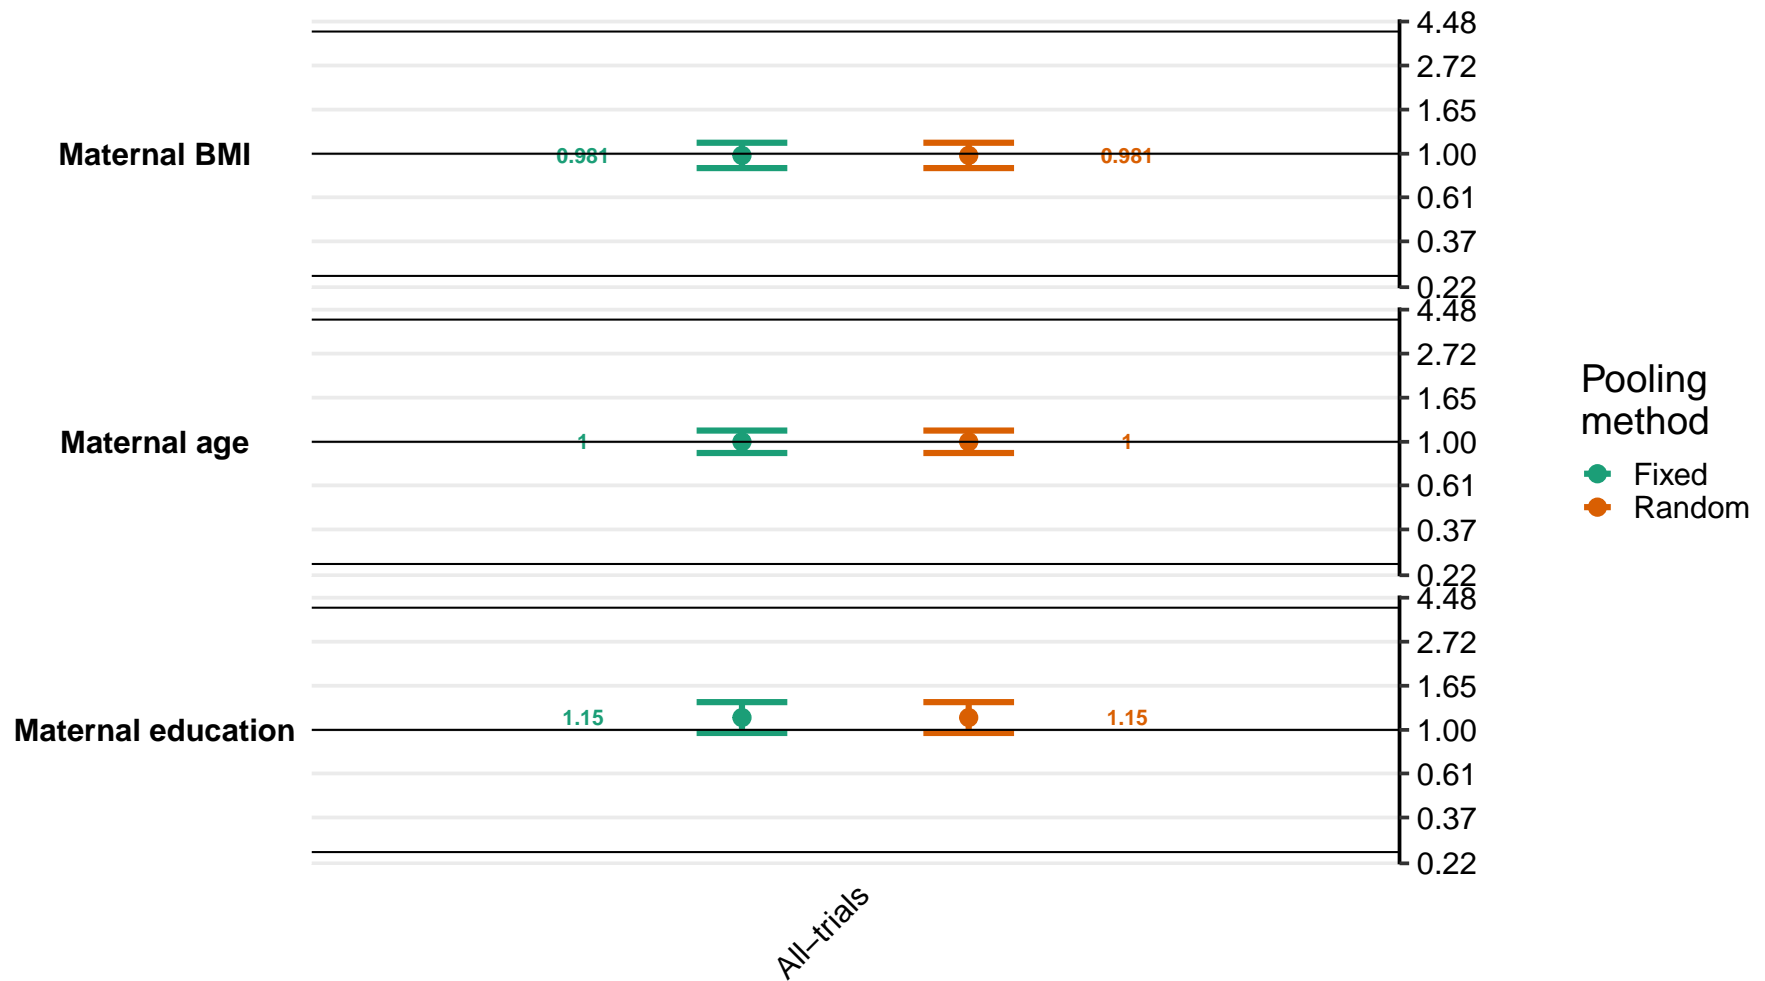

Supplemental figure 8N: Ratio of geometric mean ratios of zinc protoporphyrin concentration

8N2: By child effect modifiers

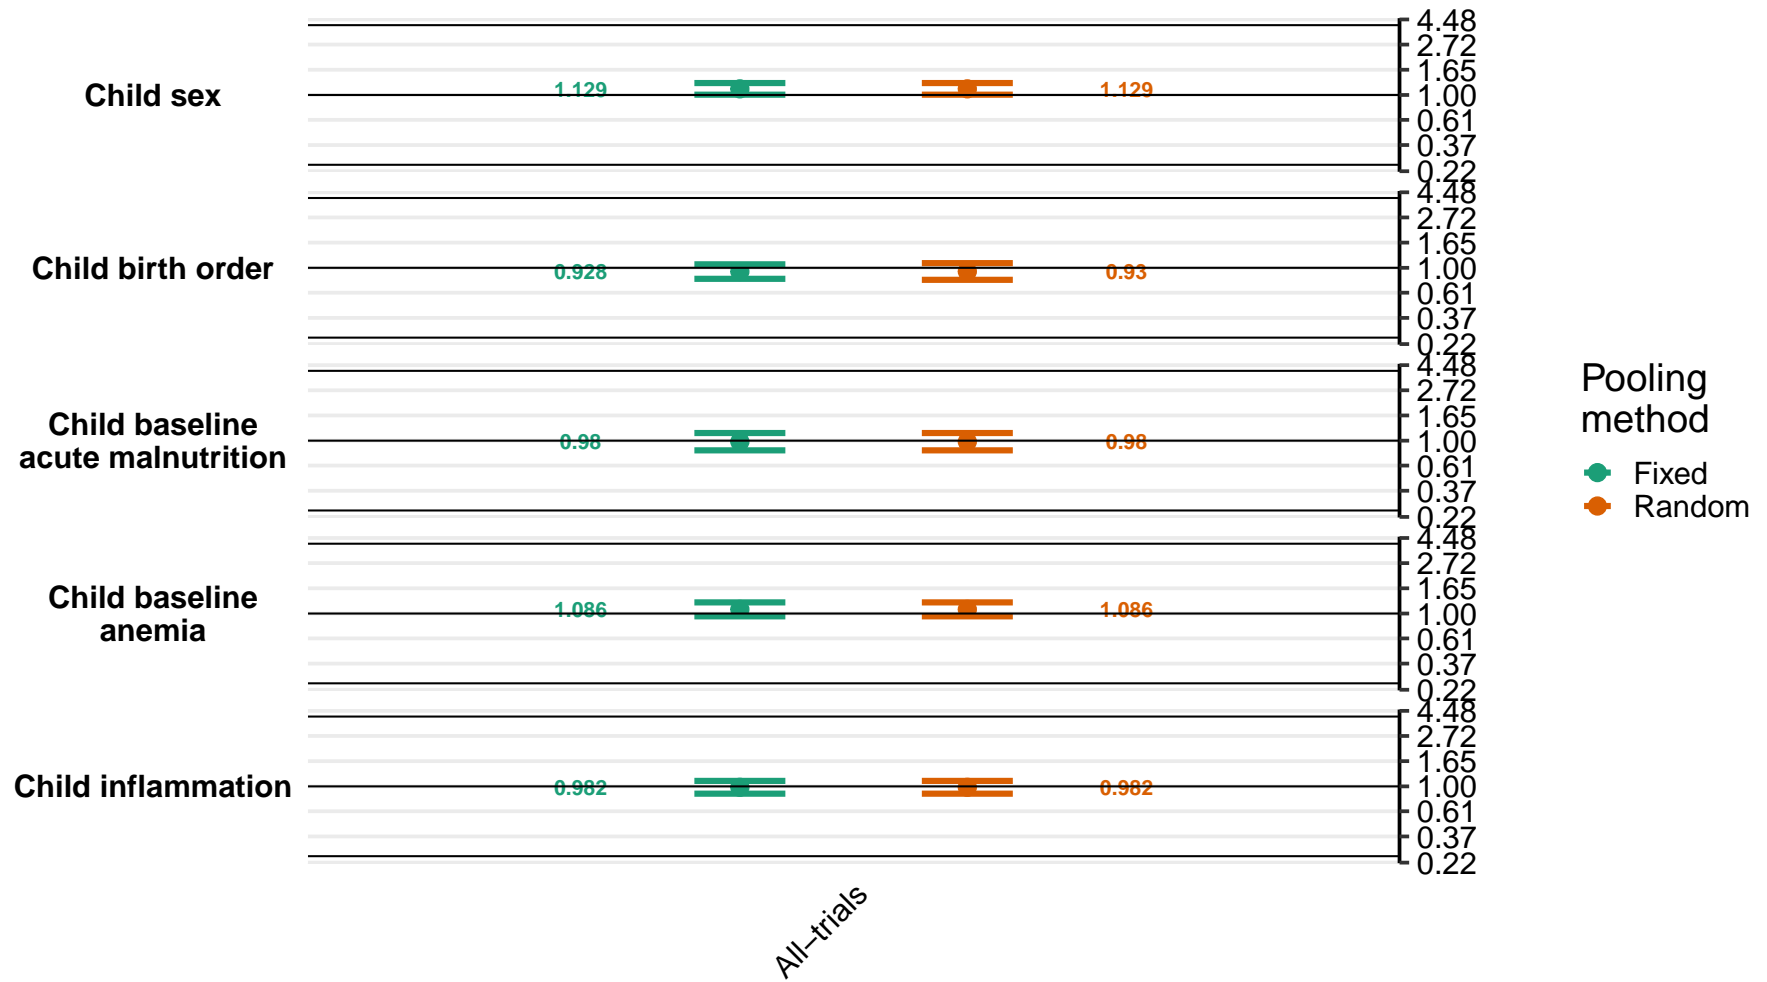



Supplemental figure 8N: Ratio of geometric mean ratios of zinc protoporphyrin concentration

8N3: By household effect modifiers

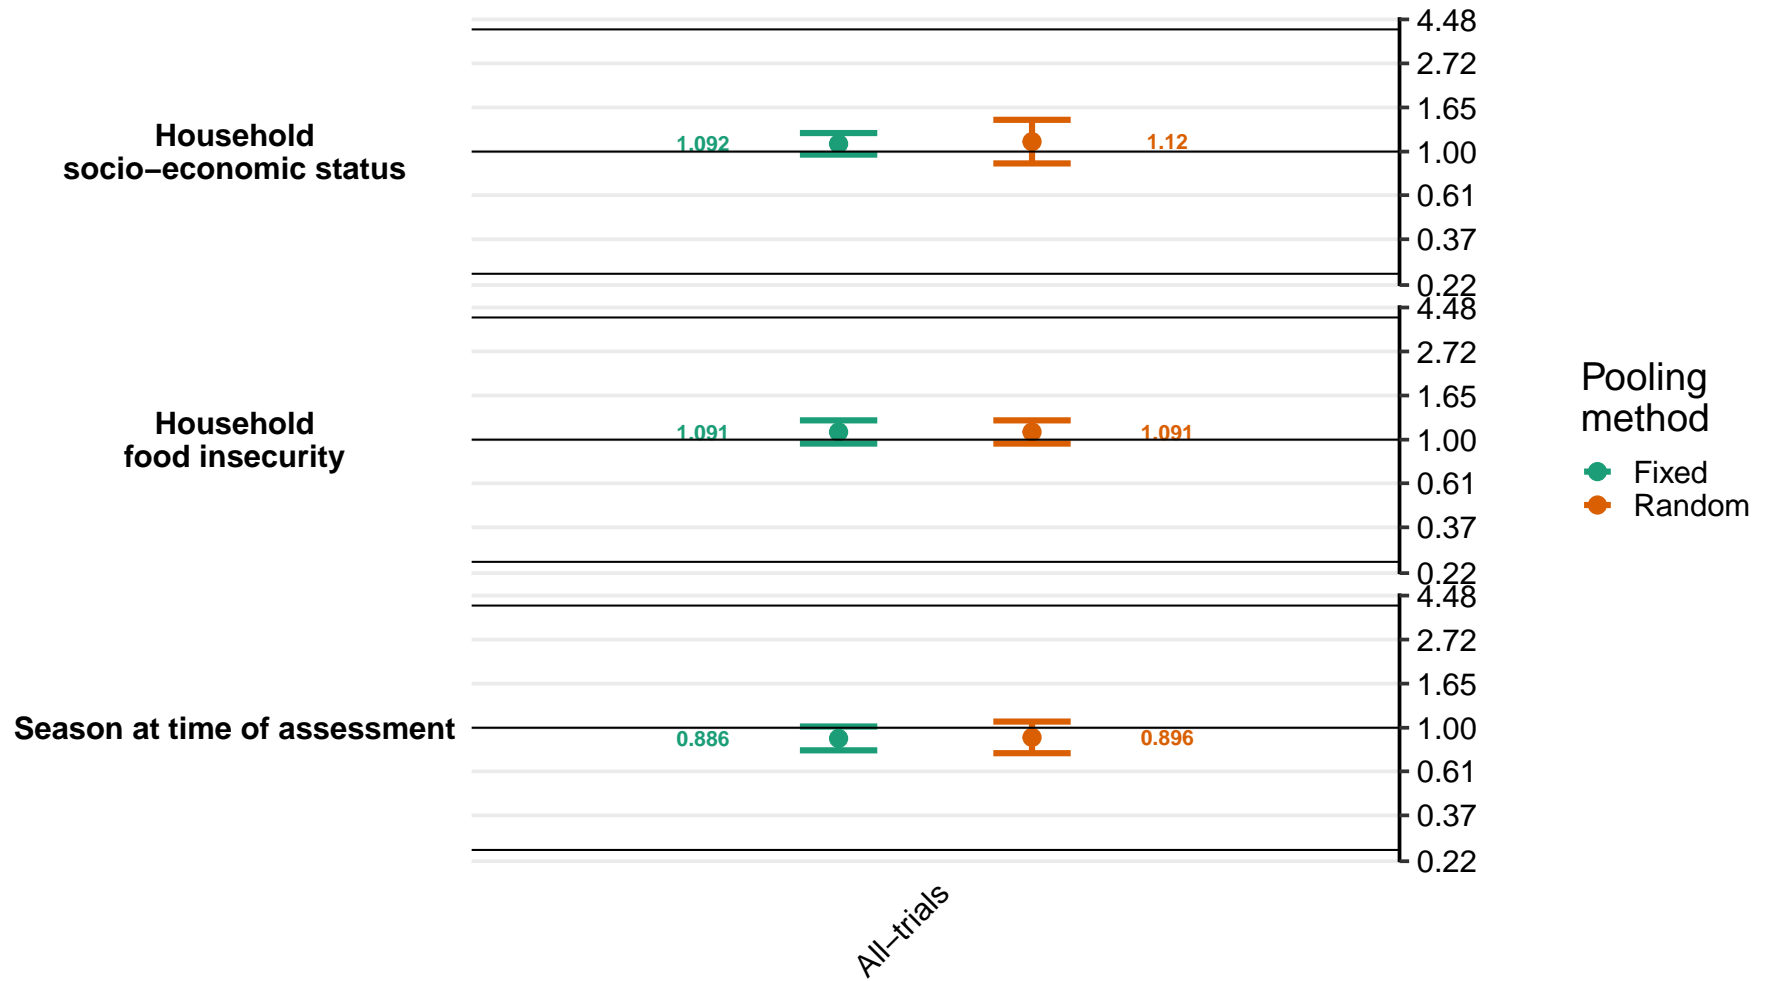

Supplemental figure 8O: Ratio of elevated zinc protoporphyrin prevalence ratios  
8O1: By maternal effect modifiers

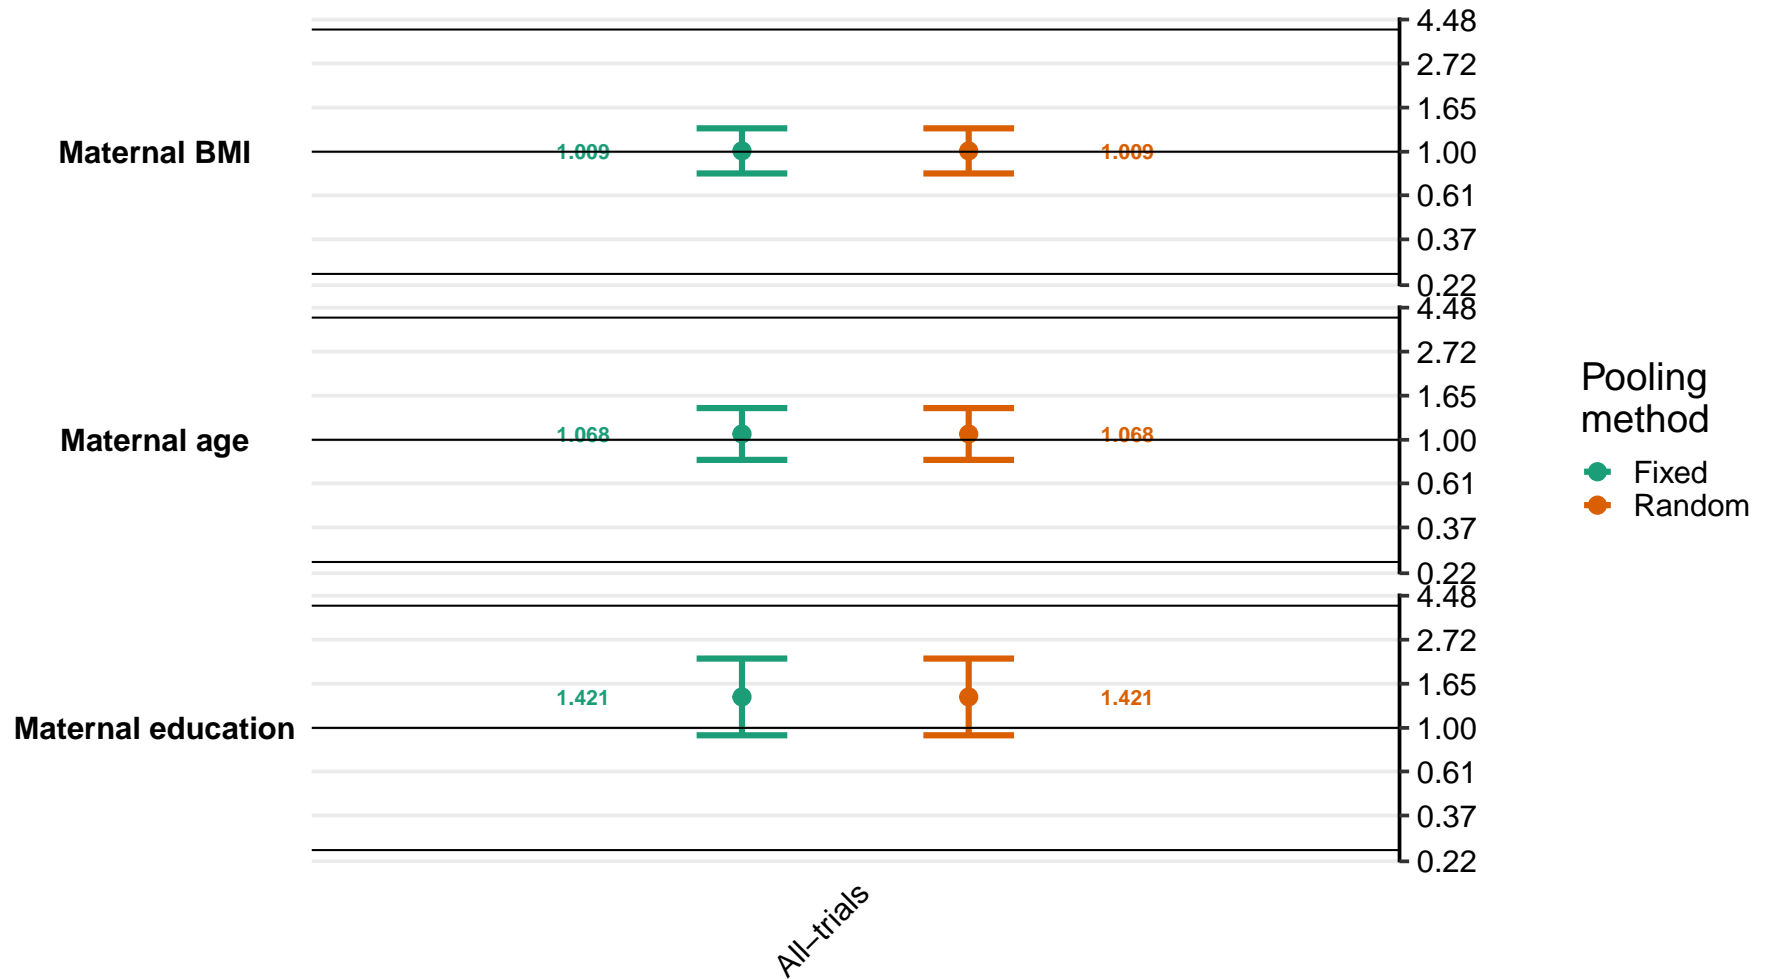

Supplemental figure 8O: Ratio of elevated zinc protoporphyrin prevalence ratios

8O2: By child effect modifiers

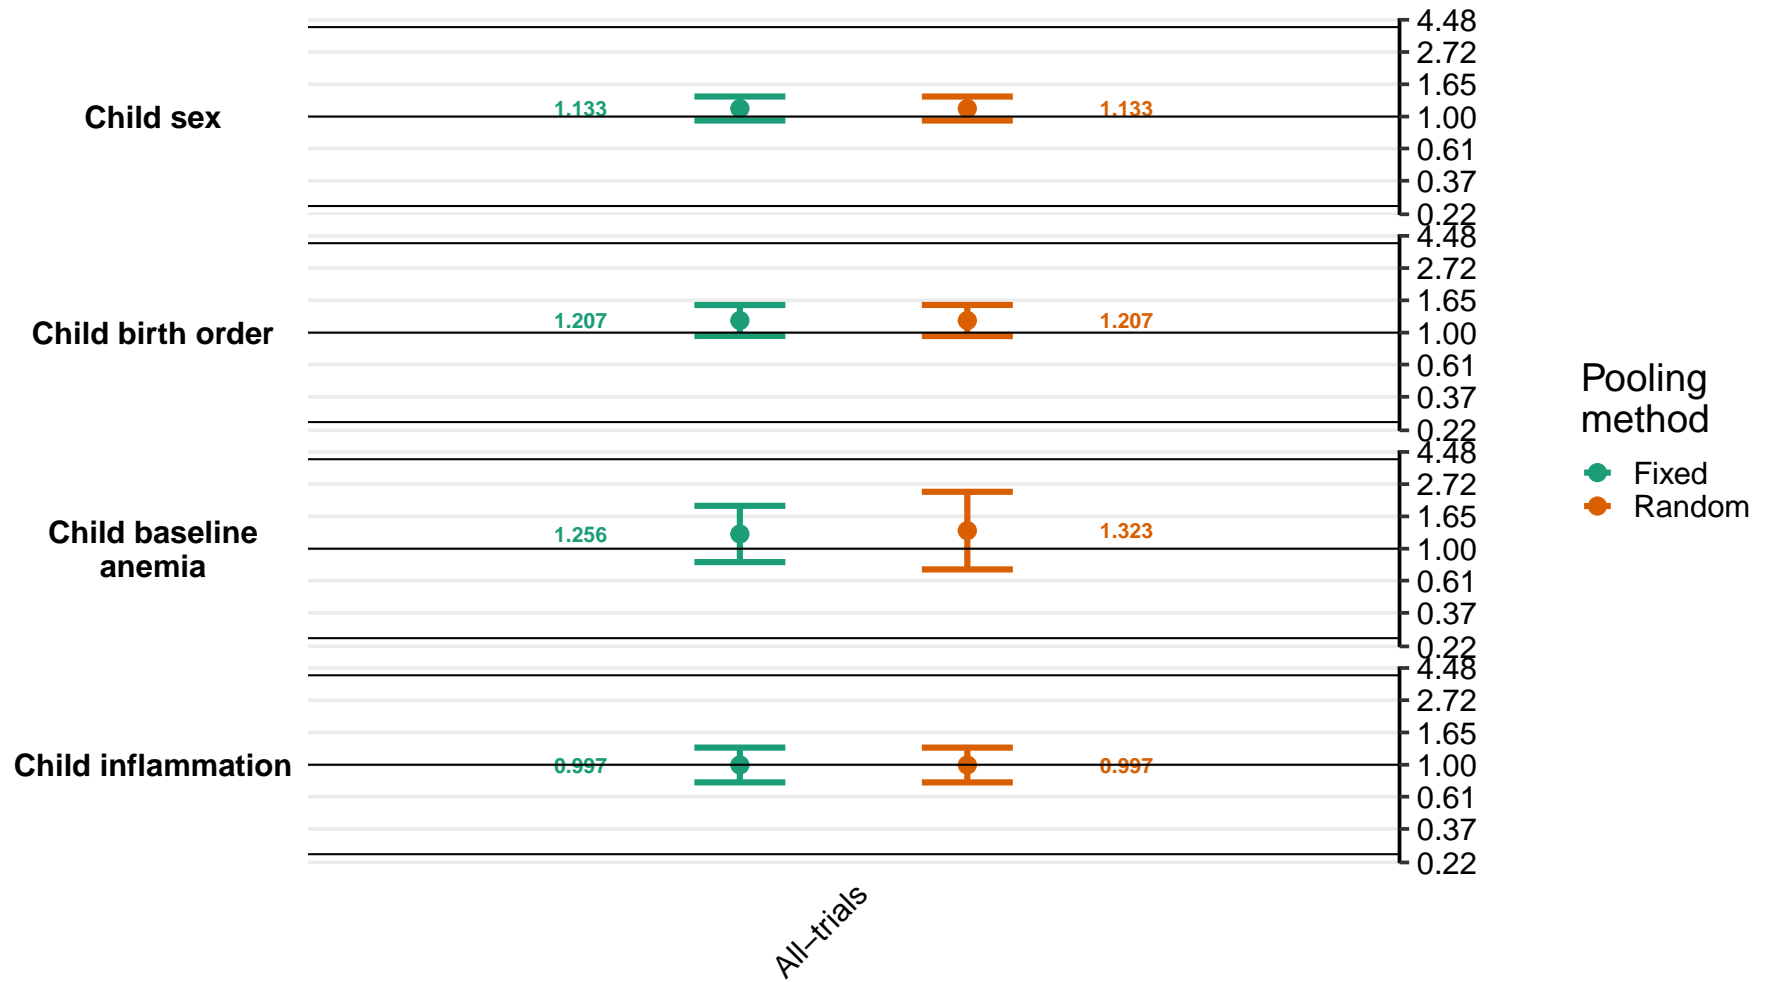

Supplemental figure 8O: Ratio of elevated zinc protoporphyrin prevalence ratios

8O3: By household effect modifiers

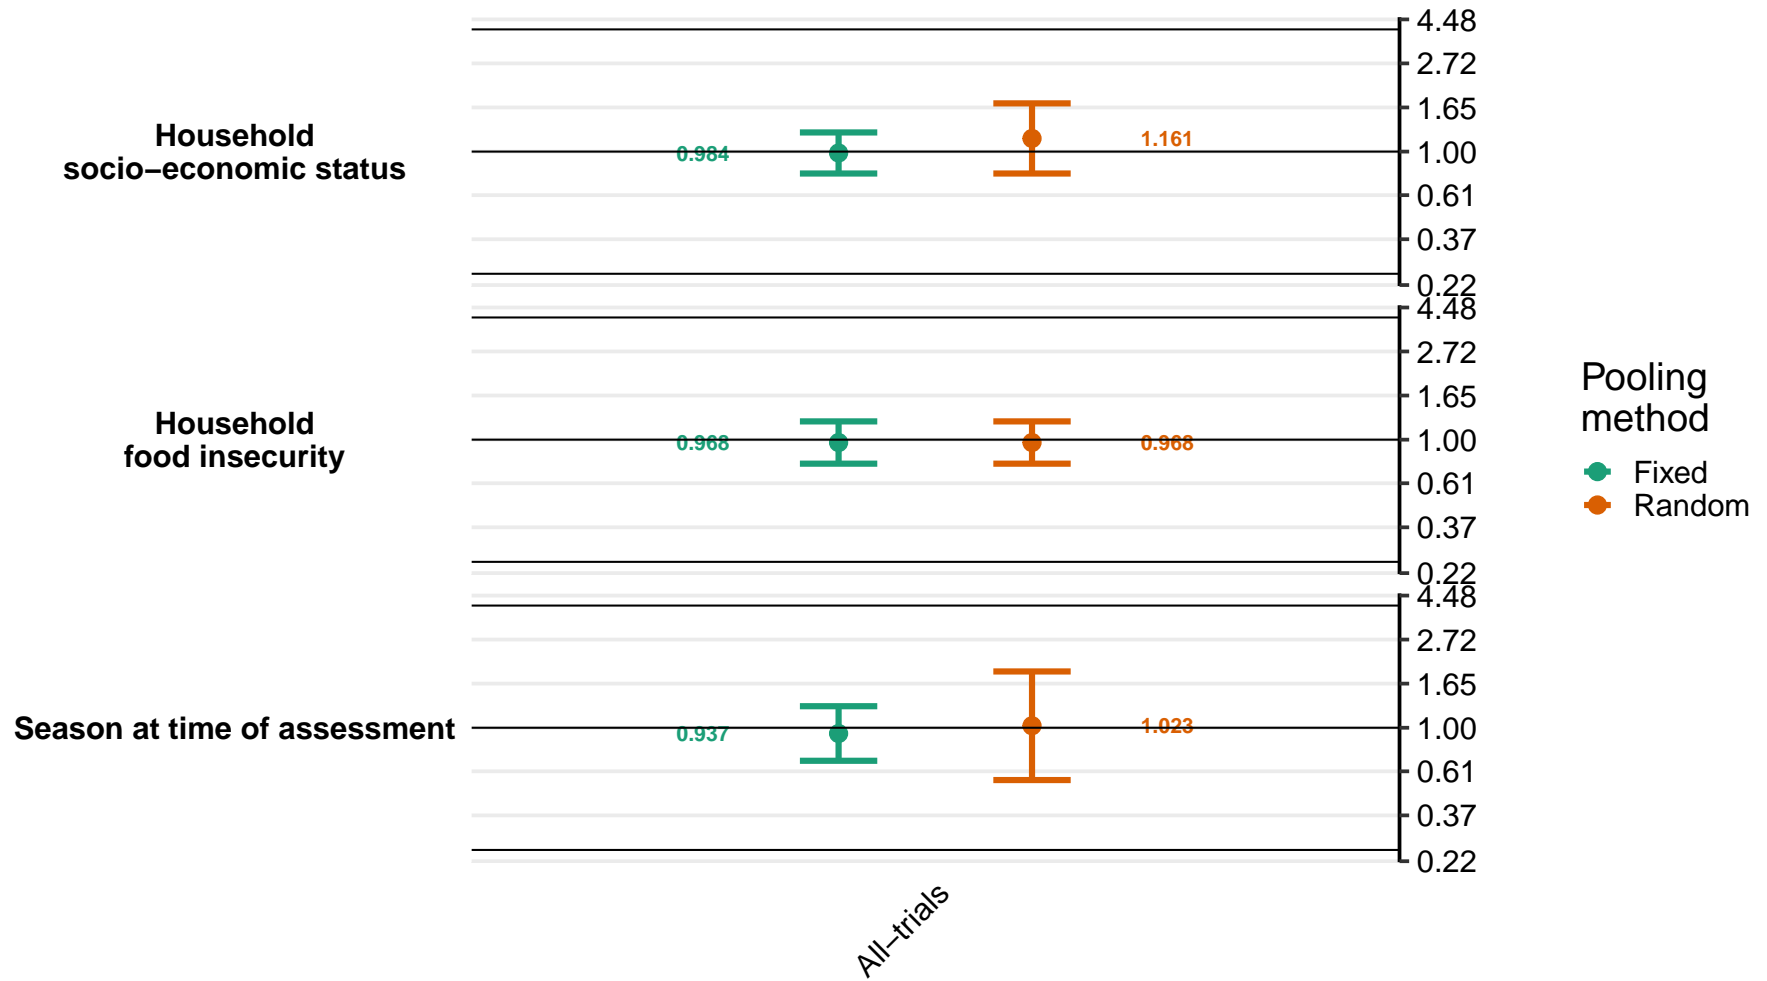

# Supplemental figure 8P: Difference in elevated zinc protoporphyrin prevalence differences

8P1: By maternal effect modifiers

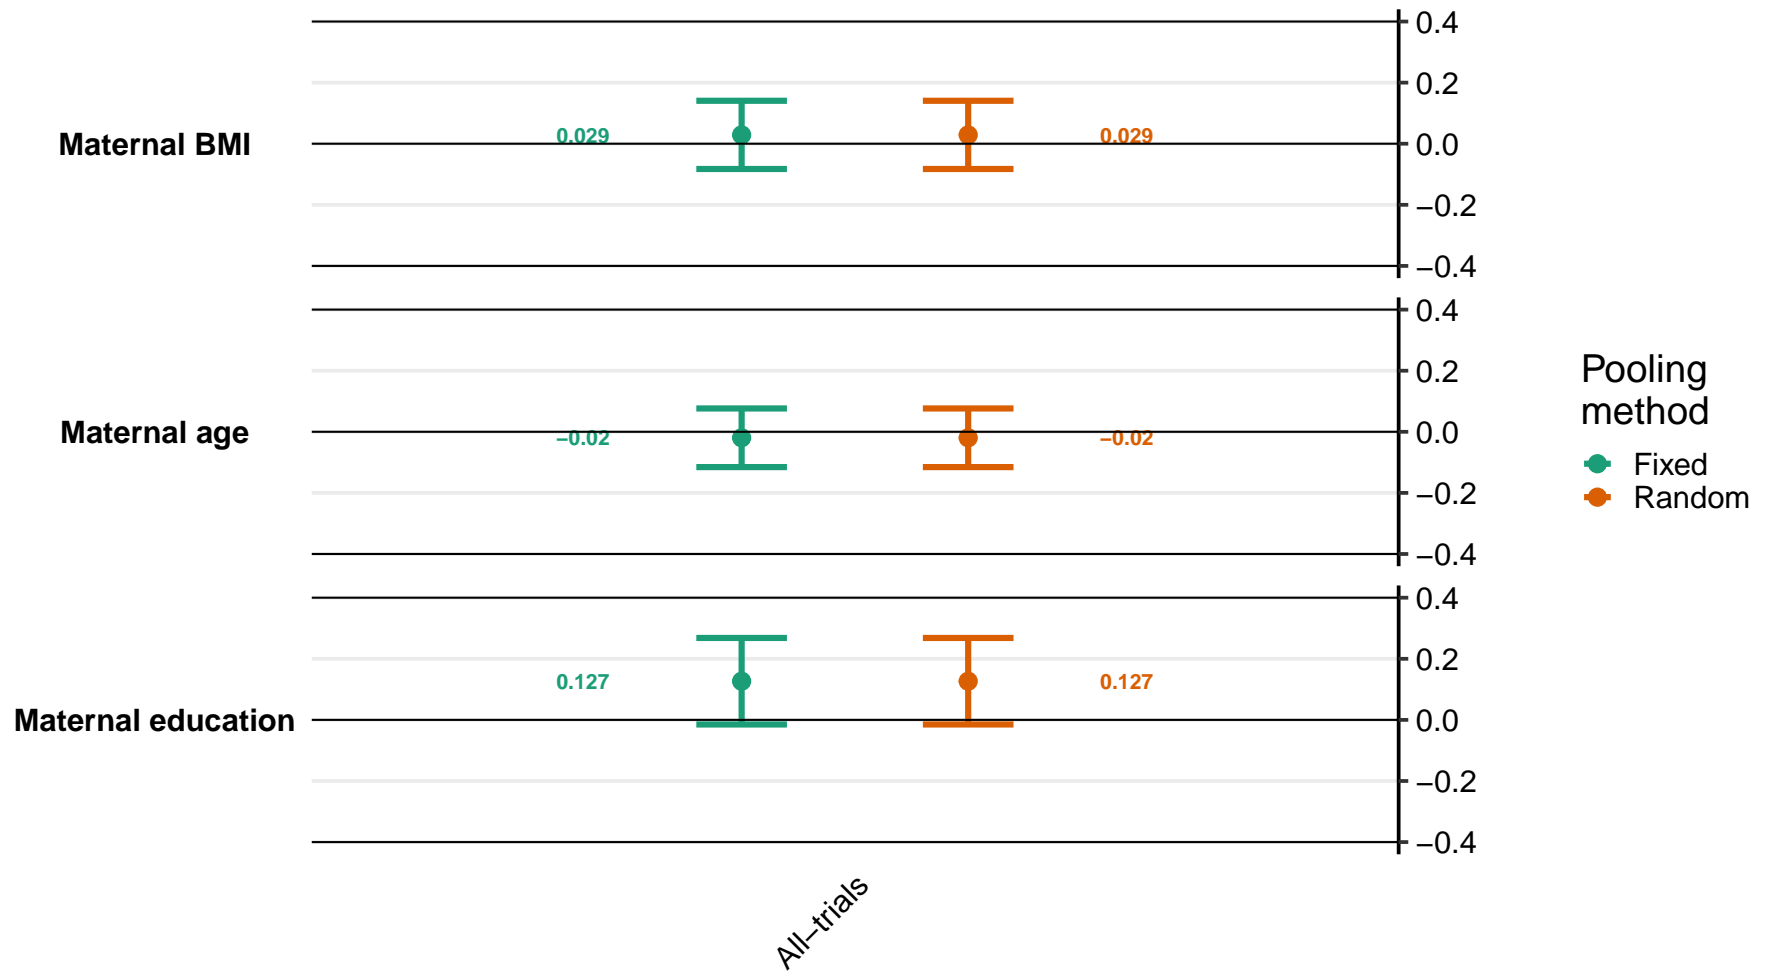

Supplemental figure 8P: Difference in elevated zinc protoporphyrin prevalence differences

8P2: By child effect modifiers

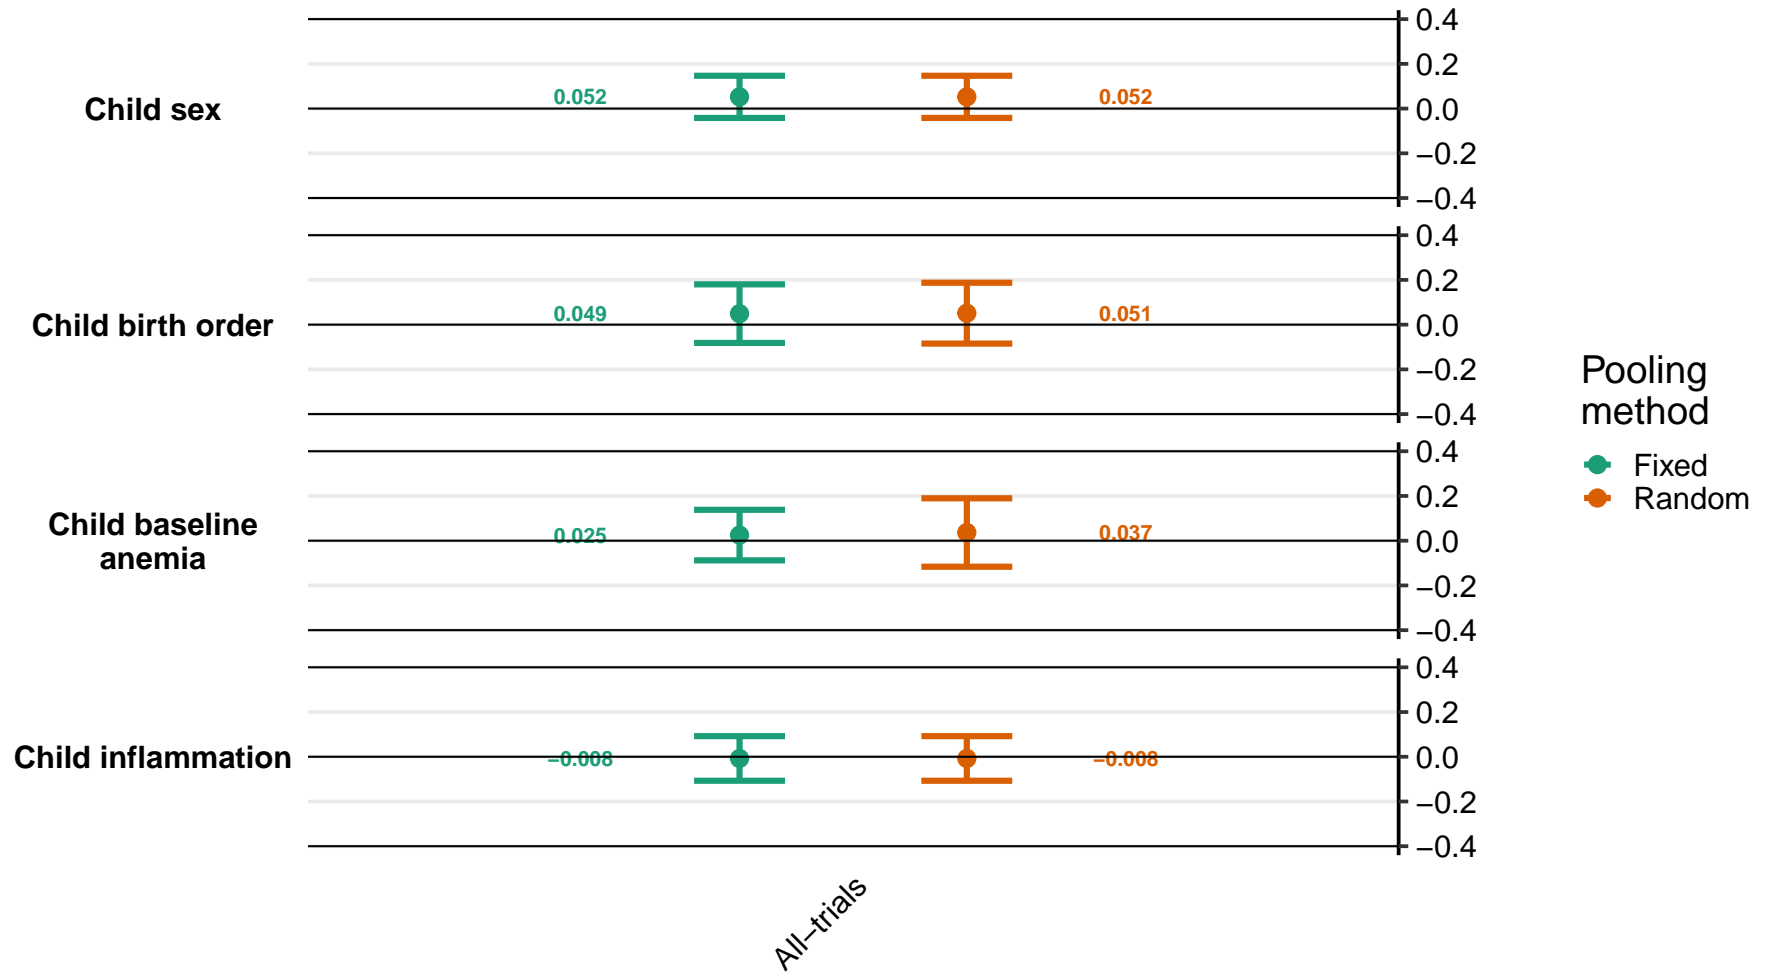

Supplemental figure 8P: Difference in elevated zinc protoporphyrin prevalence differences

8P3: By household effect modifiers

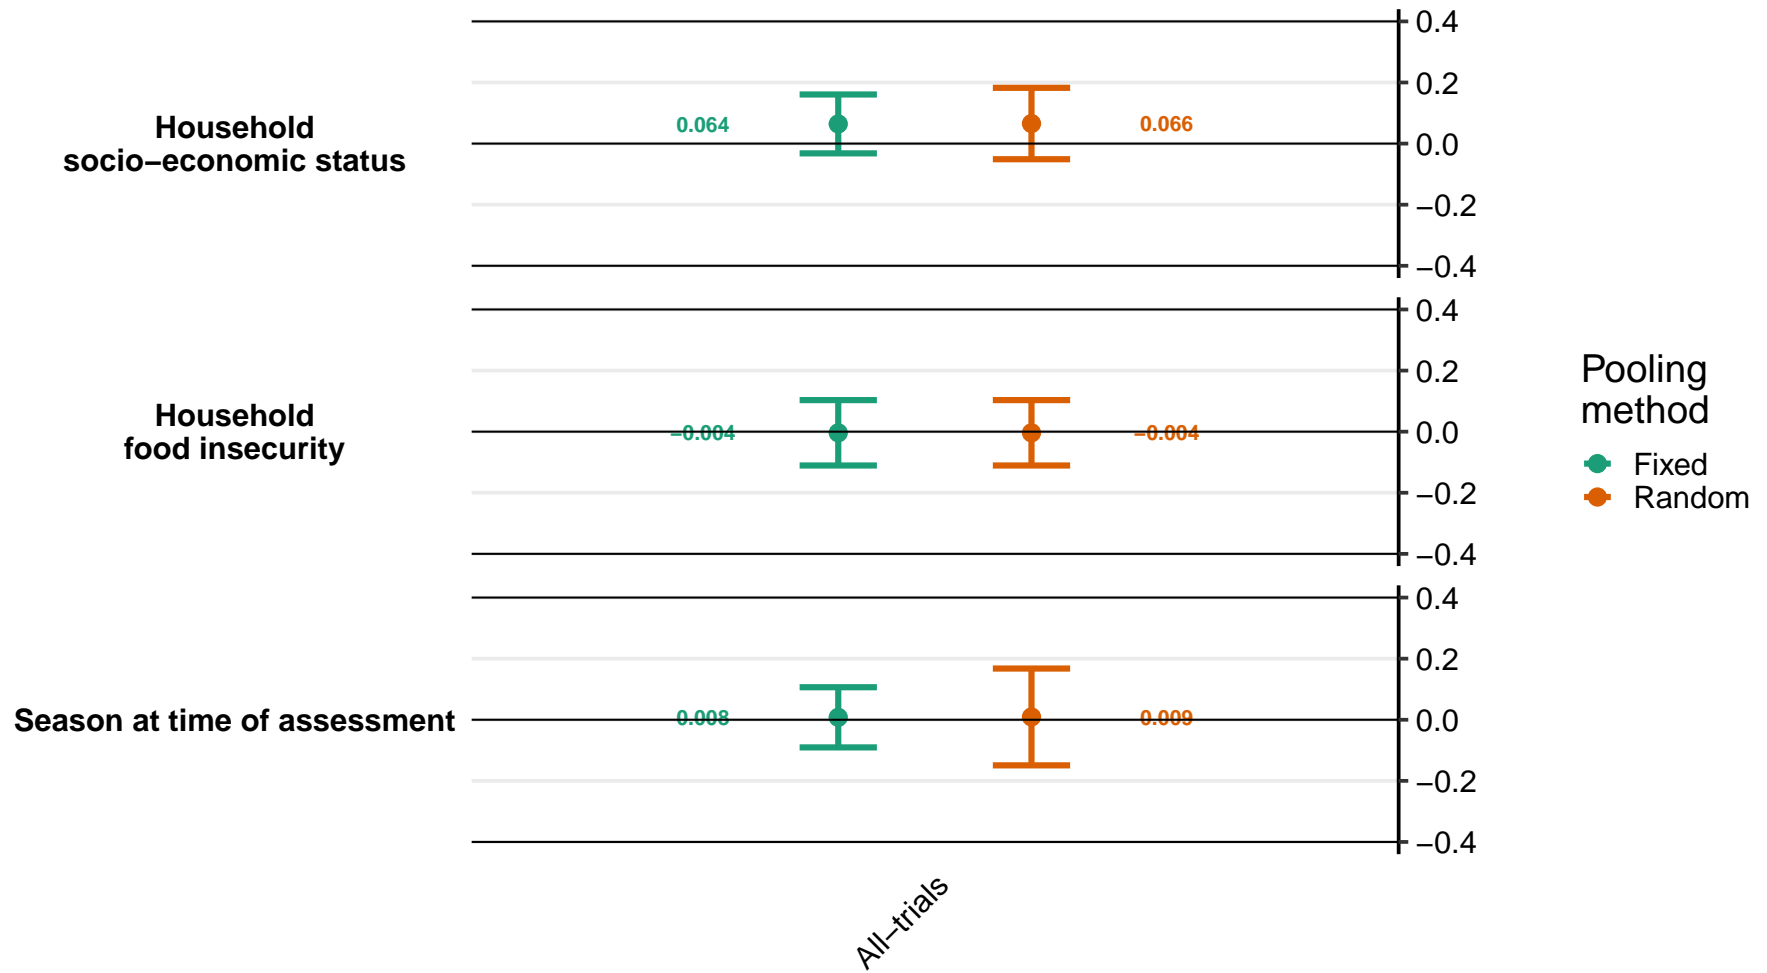

Supplemental figure 8Q: Ratio of geometric mean ratios of plasma zinc concentration  
8Q1: By maternal effect modifiers

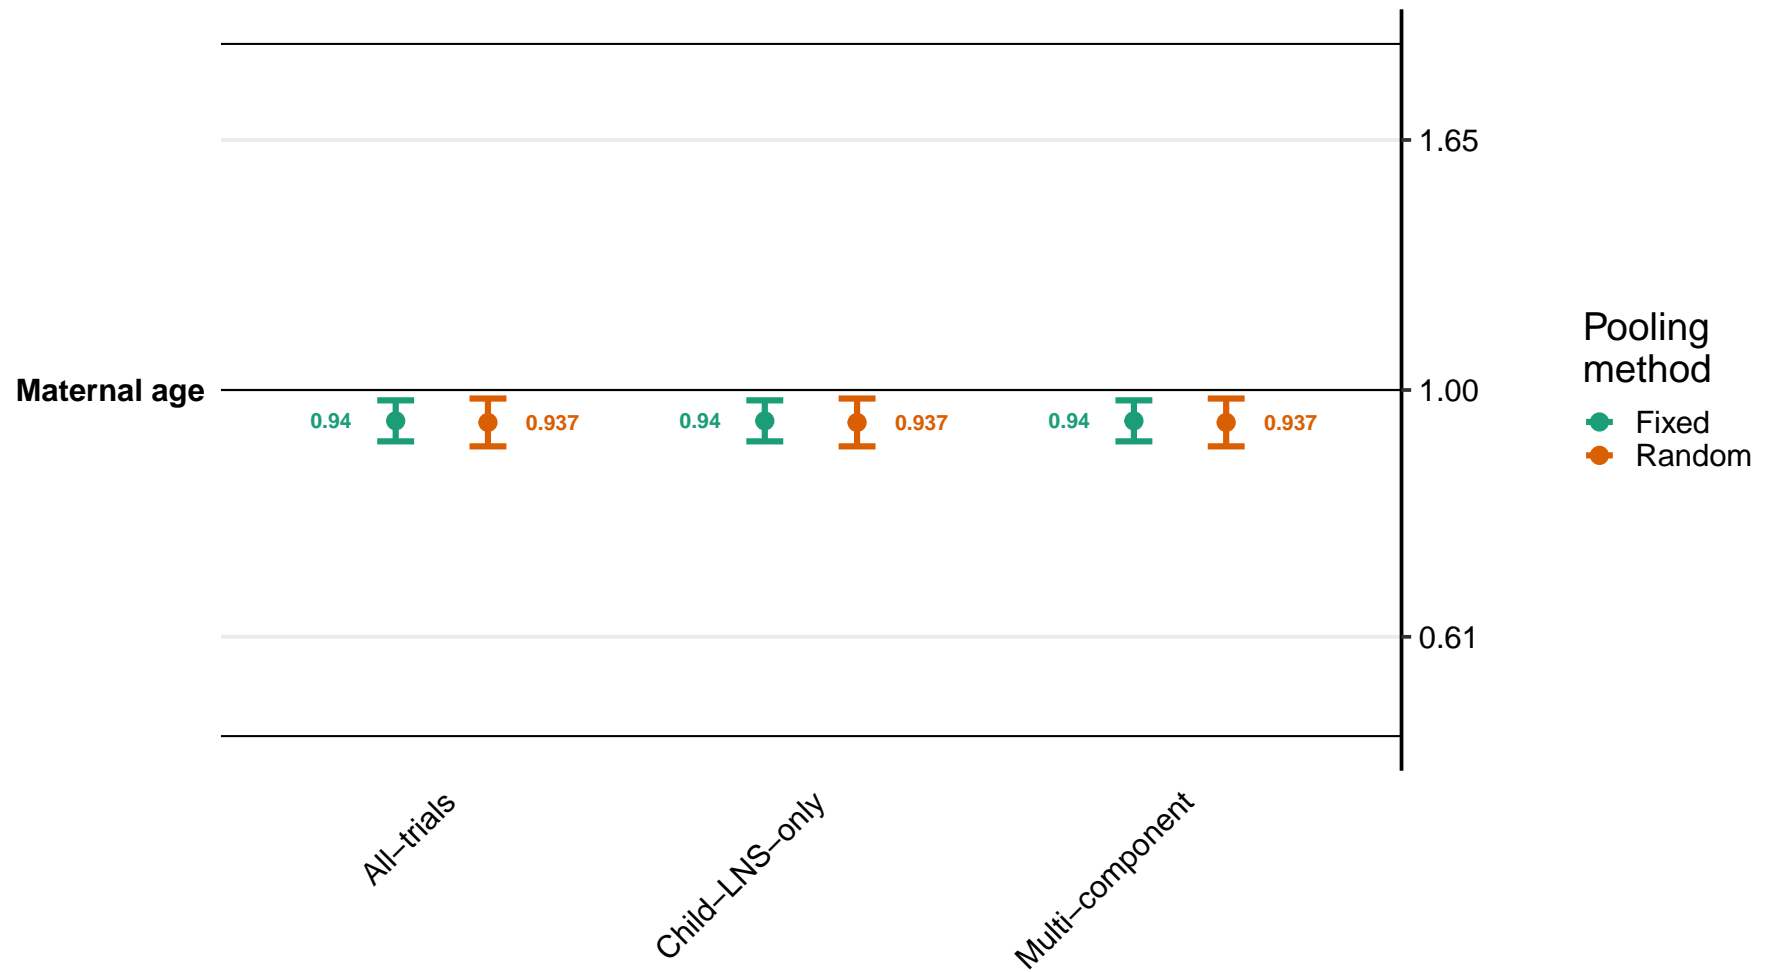



Supplemental figure 8Q: Ratio of geometric mean ratios of plasma zinc concentration

8Q2: By child effect modifiers

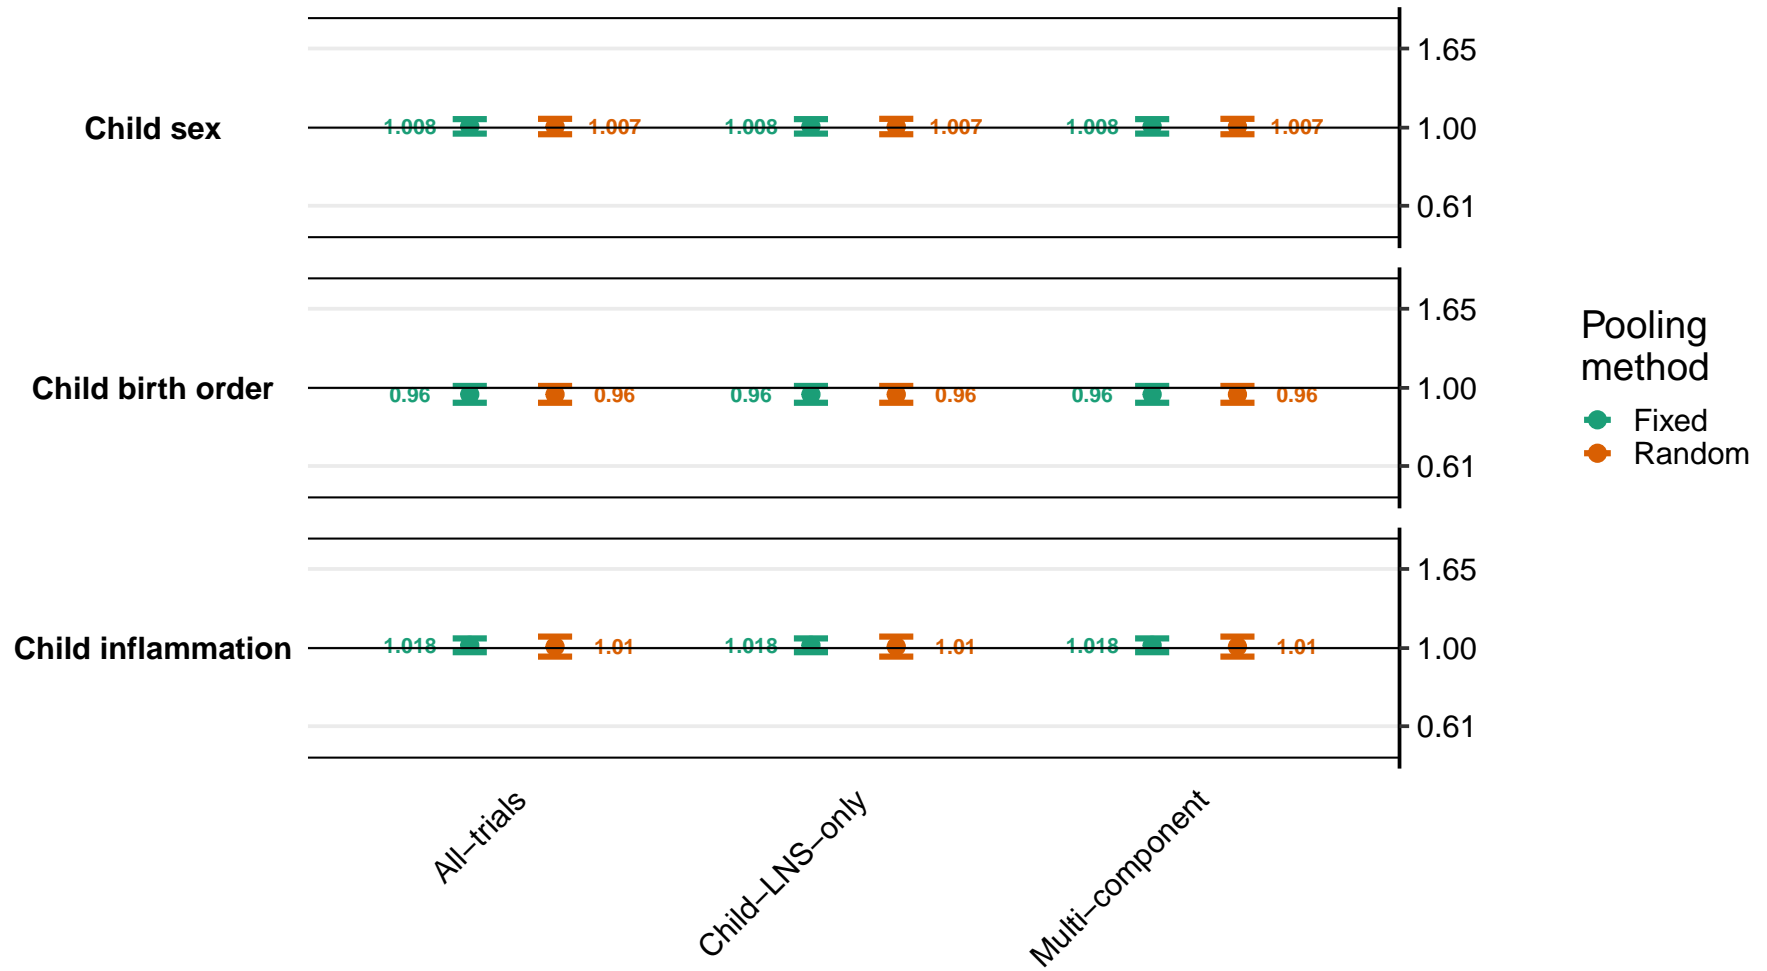

Supplemental figure 8Q: Ratio of geometric mean ratios of plasma zinc concentration

8Q3: By household effect modifiers

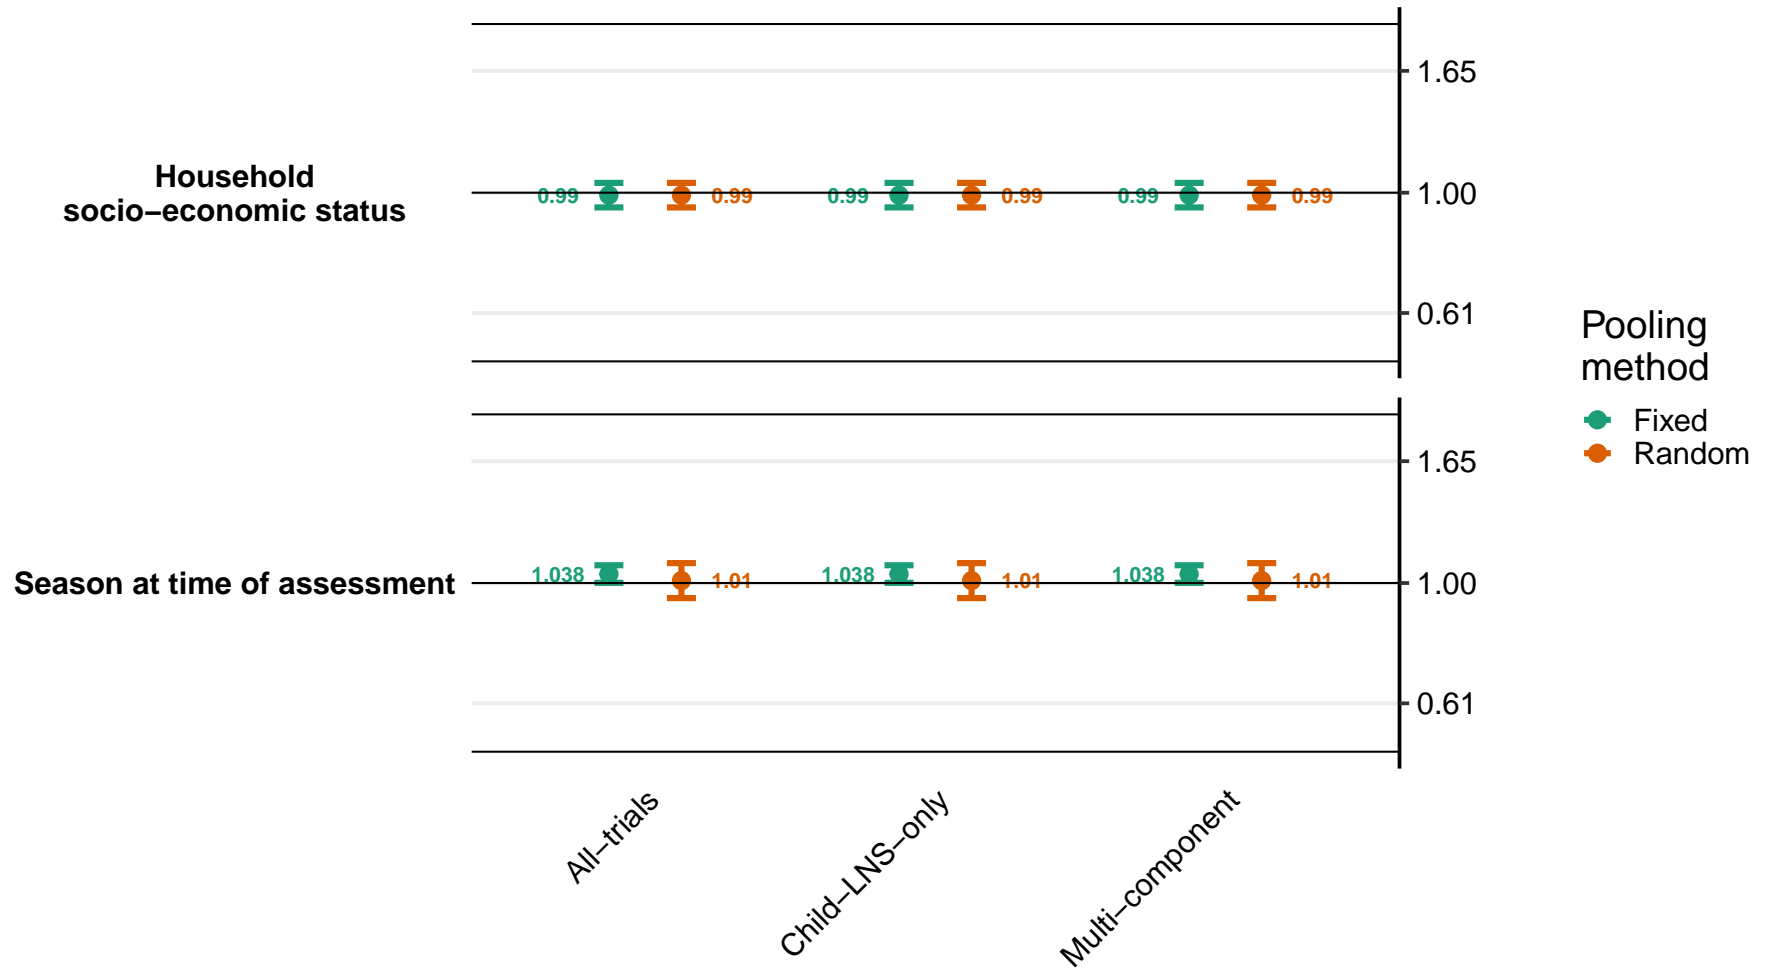

Supplemental figure 8R: Ratio of geometric mean ratios of retinol concentration  
8R1: By maternal effect modifiers

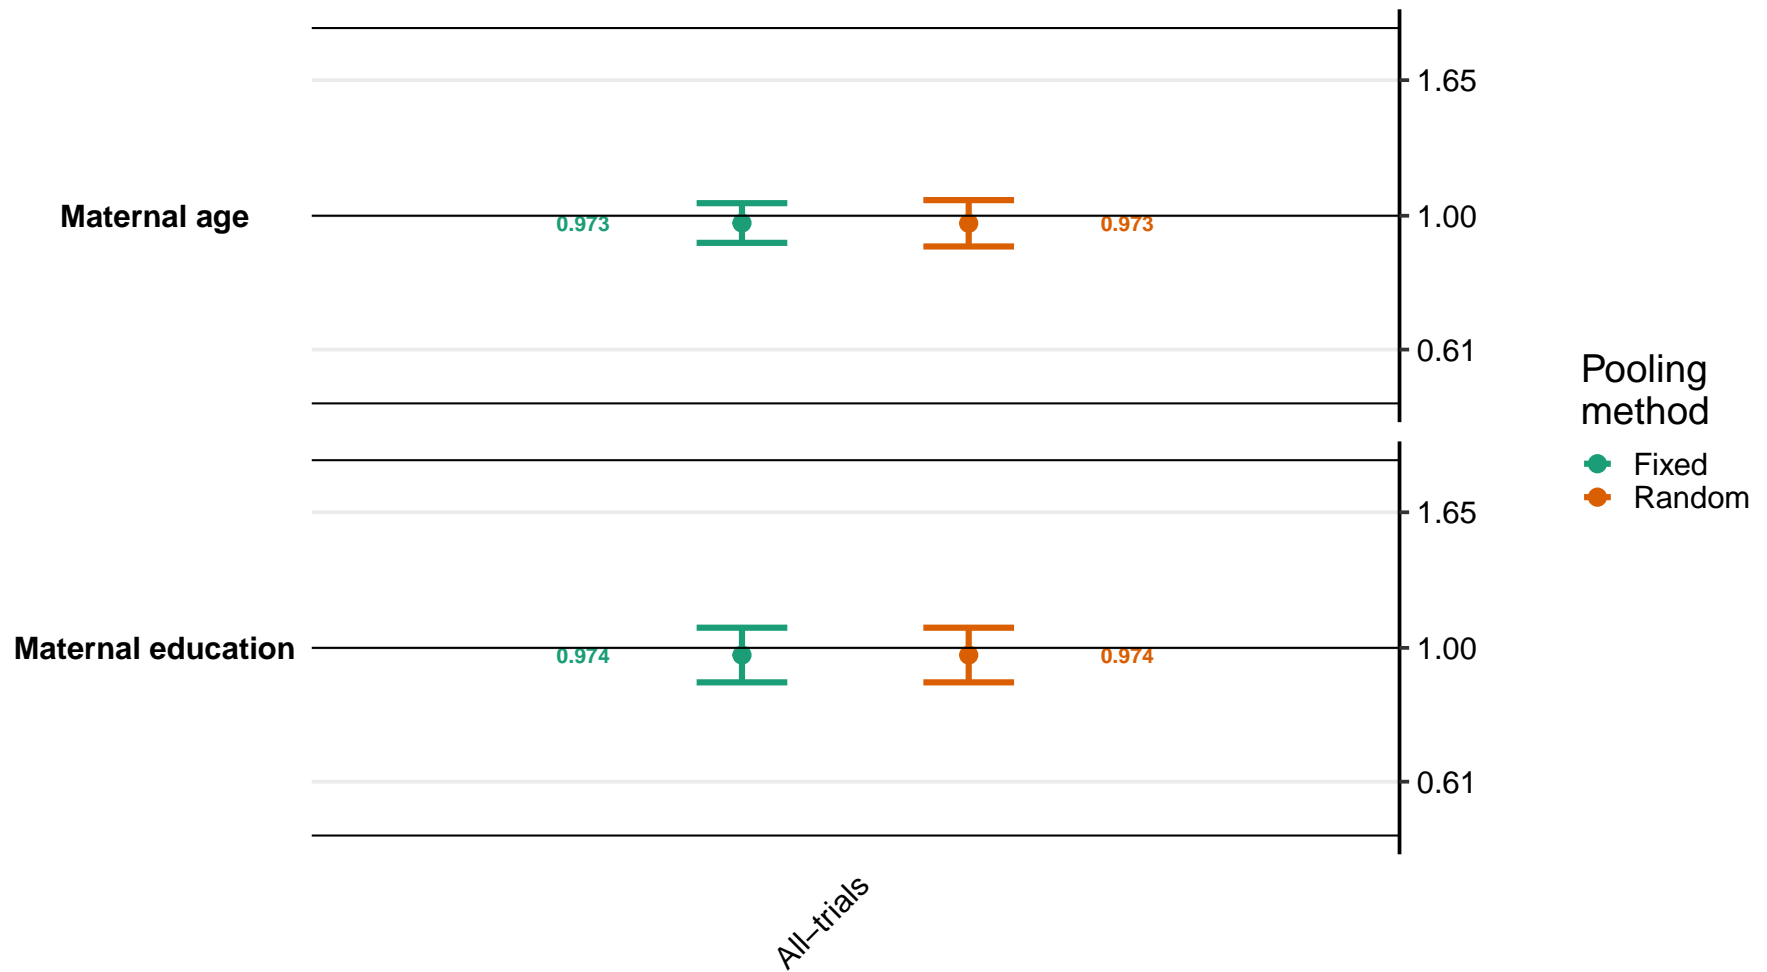

Supplemental figure 8R: Ratio of geometric mean ratios of retinol concentration

8R2: By child effect modifiers

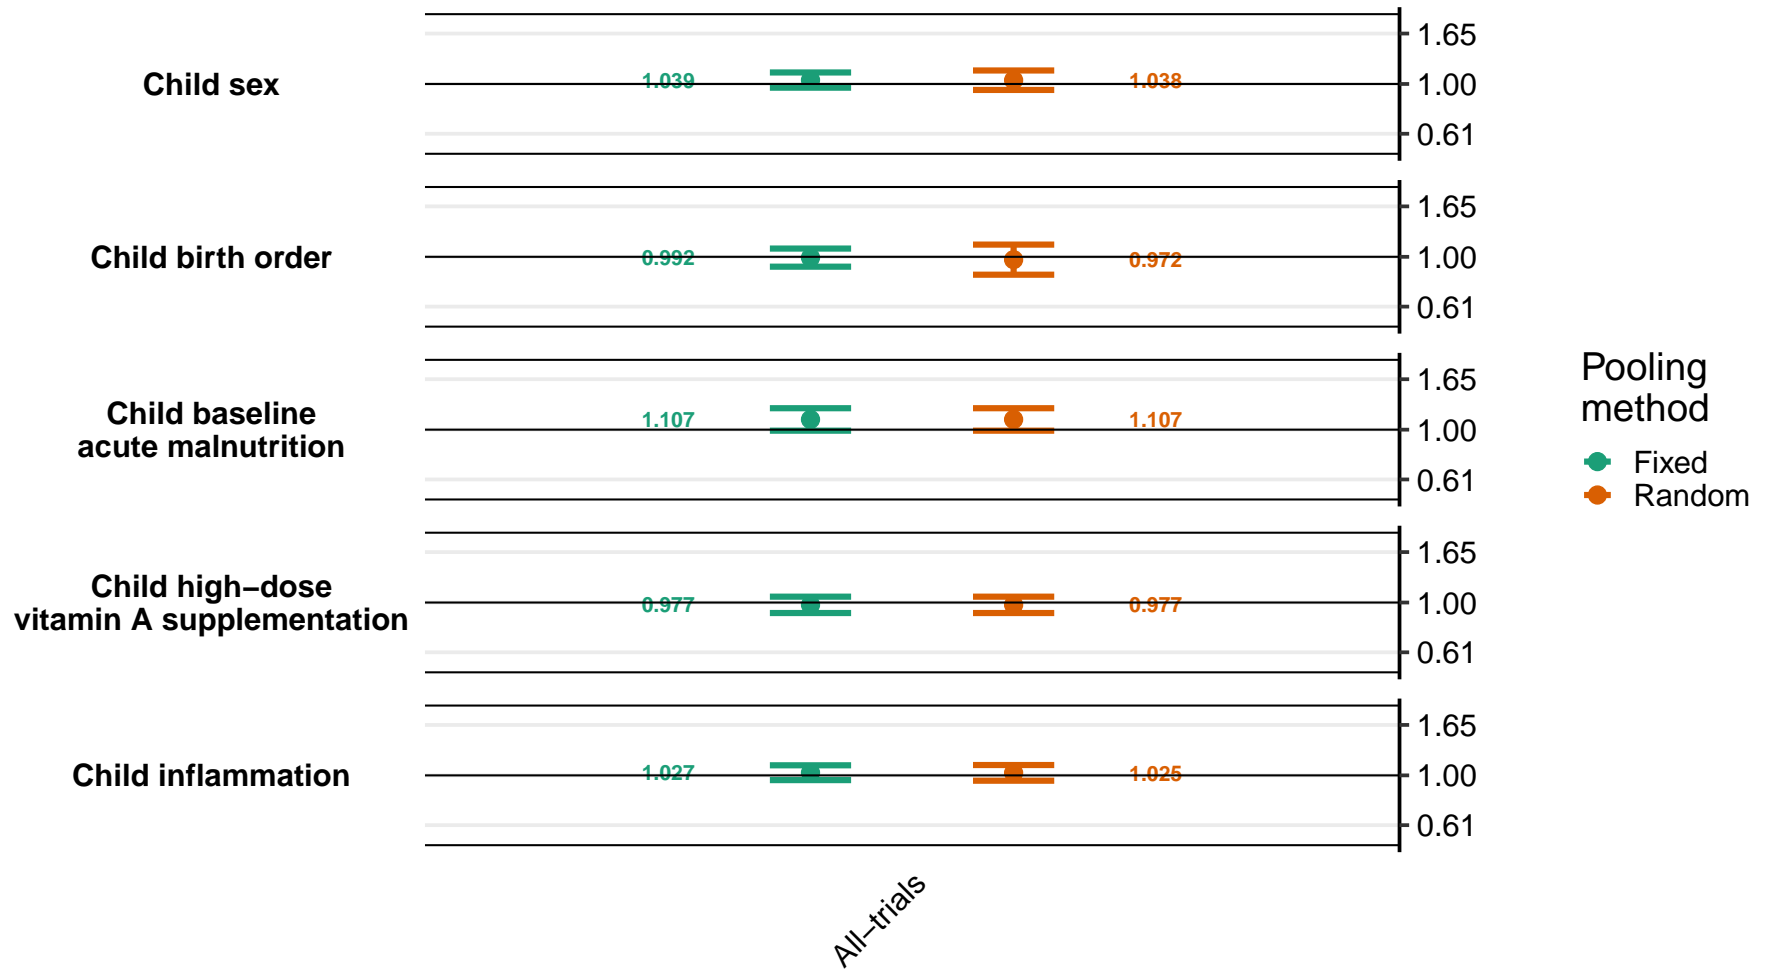

Supplemental figure 8R: Ratio of geometric mean ratios of retinol concentration

8R3: By household effect modifiers

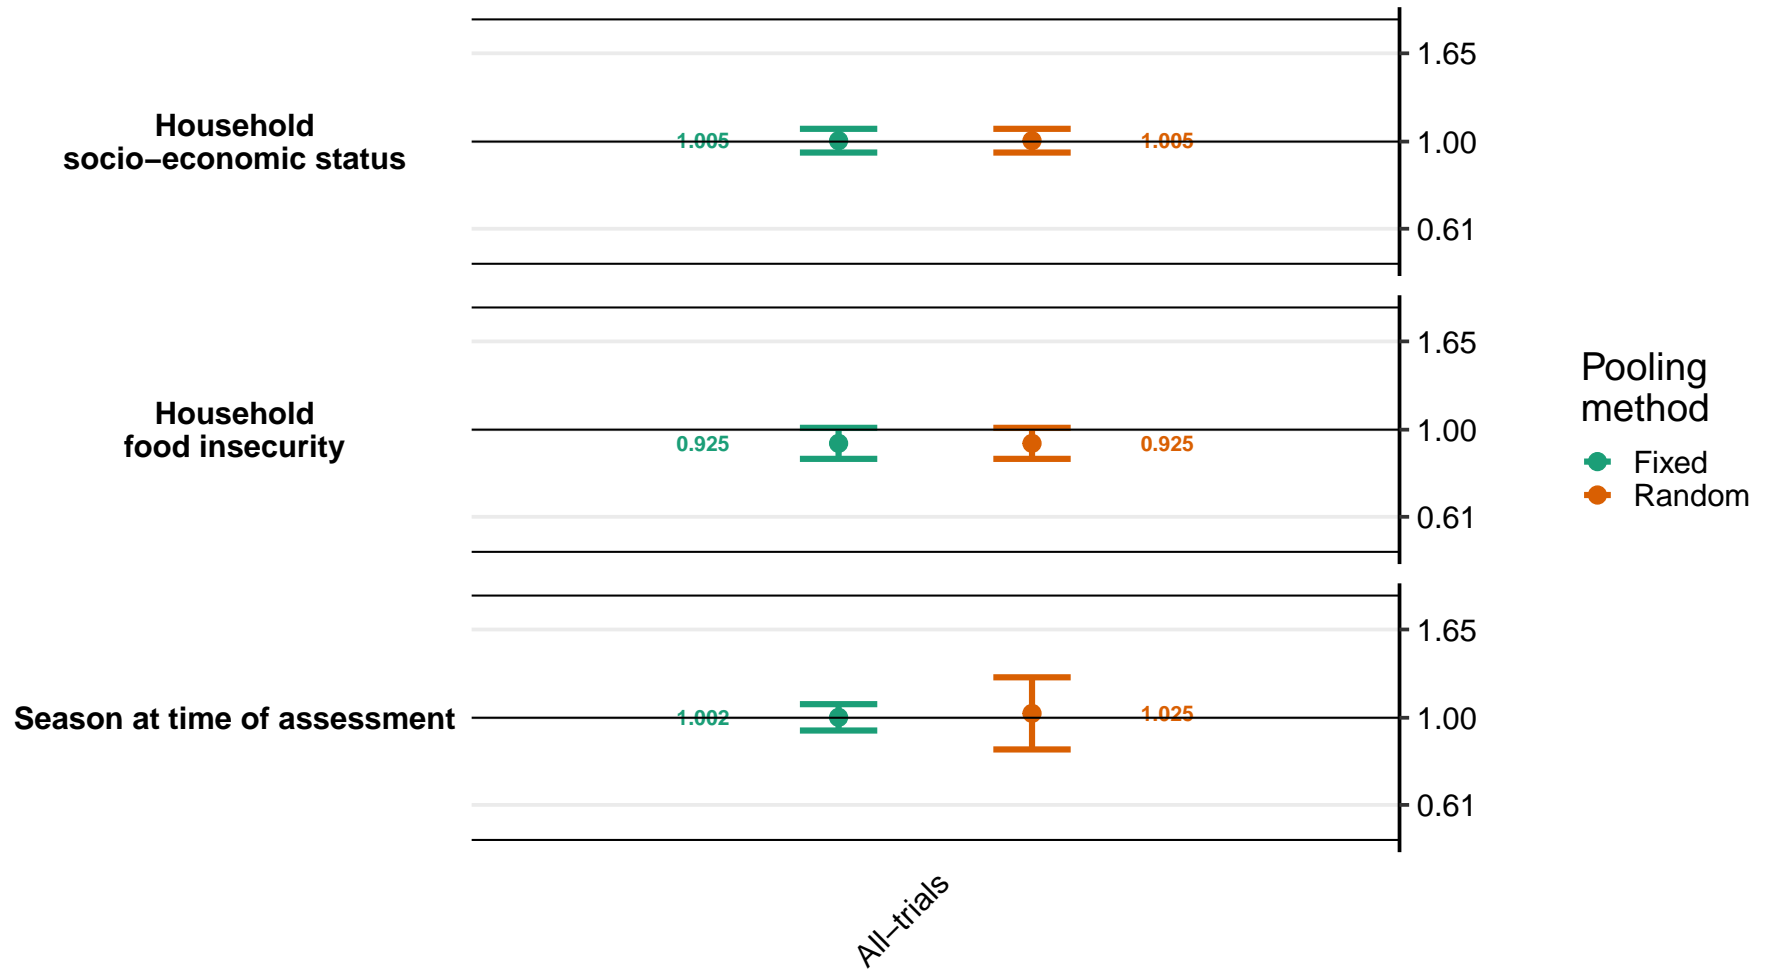

**Supplemental figure 8S: Ratio of low vitamin A (retinol < 0.70 μmol/L) prevalence ratios**  
**8S1: By maternal effect modifiers (insufficient comparisons)**

Supplemental figure 8S: Ratio of low vitamin A (retinol < 0.70  $\mu\text{mol/L}$ ) prevalence ratios

8S2: By child effect modifiers (insufficient comparisons)

Supplemental figure 8S: Ratio of low vitamin A (retinol < 0.70  $\mu\text{mol/L}$ ) prevalence ratios

8S3: By household effect modifiers (insufficient comparisons)



**Supplemental figure 8T: Difference in low vitamin A (retinol < 0.70  $\mu\text{mol/L}$ ) prevalence differences**

**8T1: By maternal effect modifiers (insufficient comparisons)**

Supplemental figure 8T: Difference in low vitamin A (retinol < 0.70  $\mu\text{mol/L}$ ) prevalence differences

8T2: By child effect modifiers (insufficient comparisons)

Supplemental figure 8T: Difference in low vitamin A (retinol < 0.70  $\mu\text{mol/L}$ ) prevalence differences

8T3: By household effect modifiers (insufficient comparisons)

Supplemental figure 8U: Ratio of marginal vitamin A (retinol < 1.05  $\mu\text{mol/L}$ ) prevalence ratios  
8U1: By maternal effect modifiers

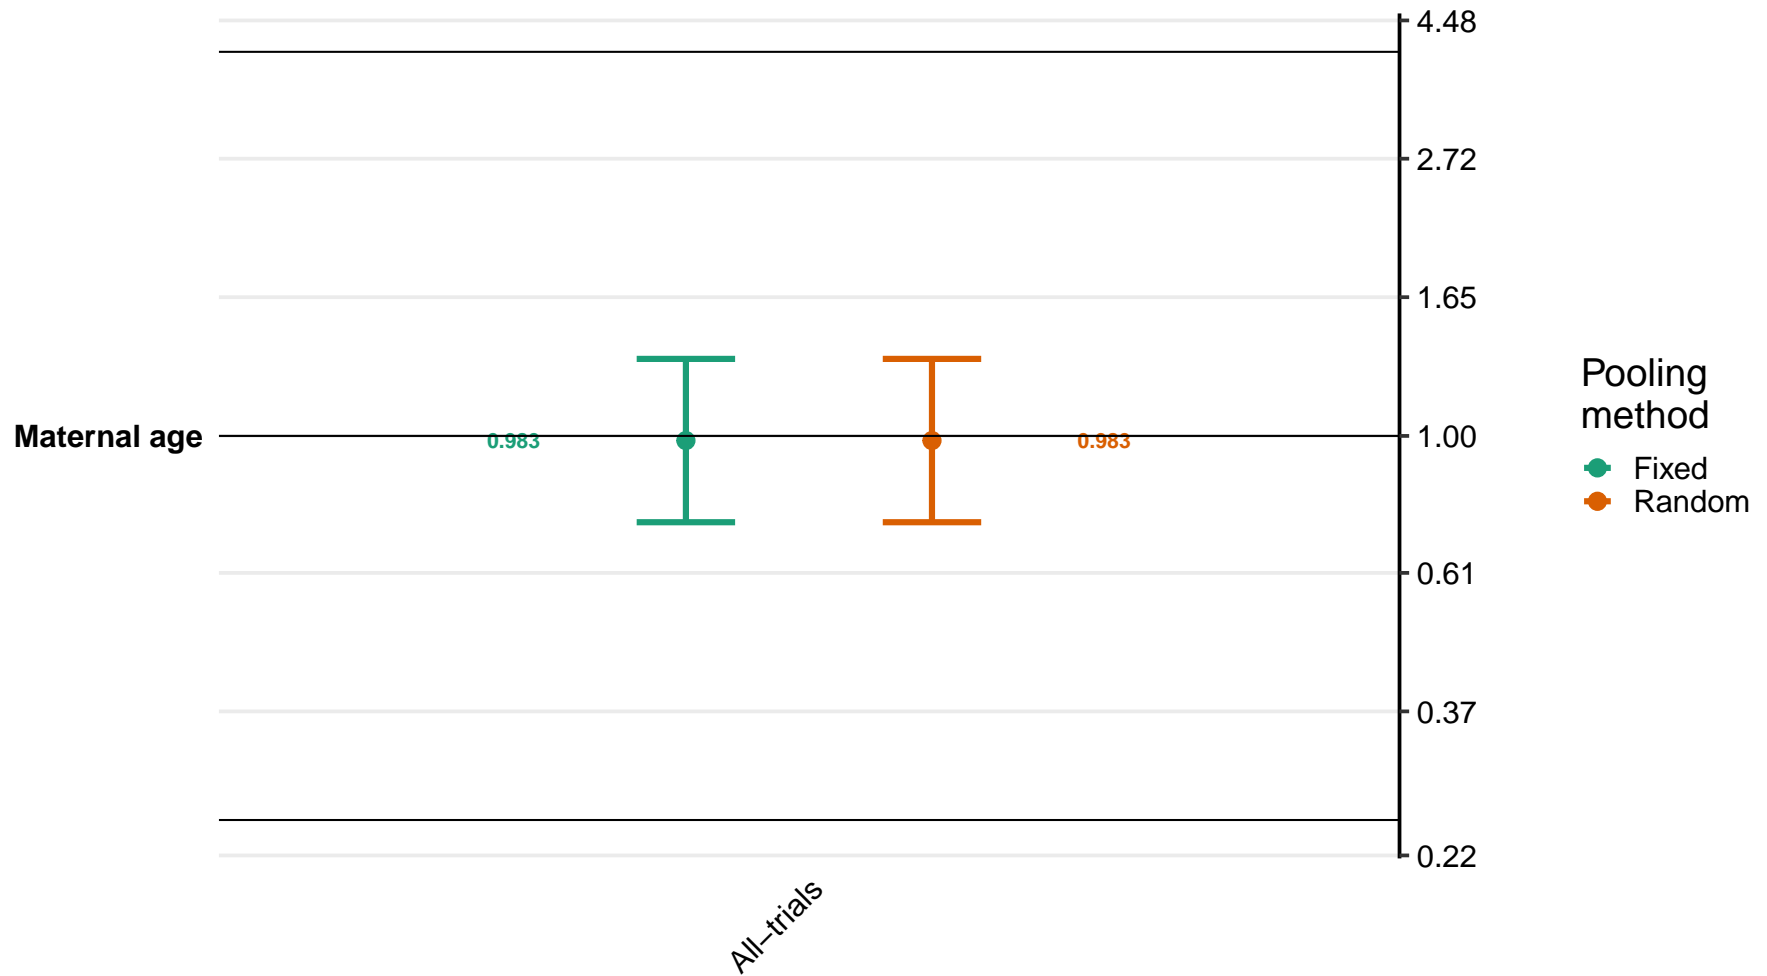

Supplemental figure 8U: Ratio of marginal vitamin A (retinol < 1.05 µmol/L) prevalence ratios

8U2: By child effect modifiers

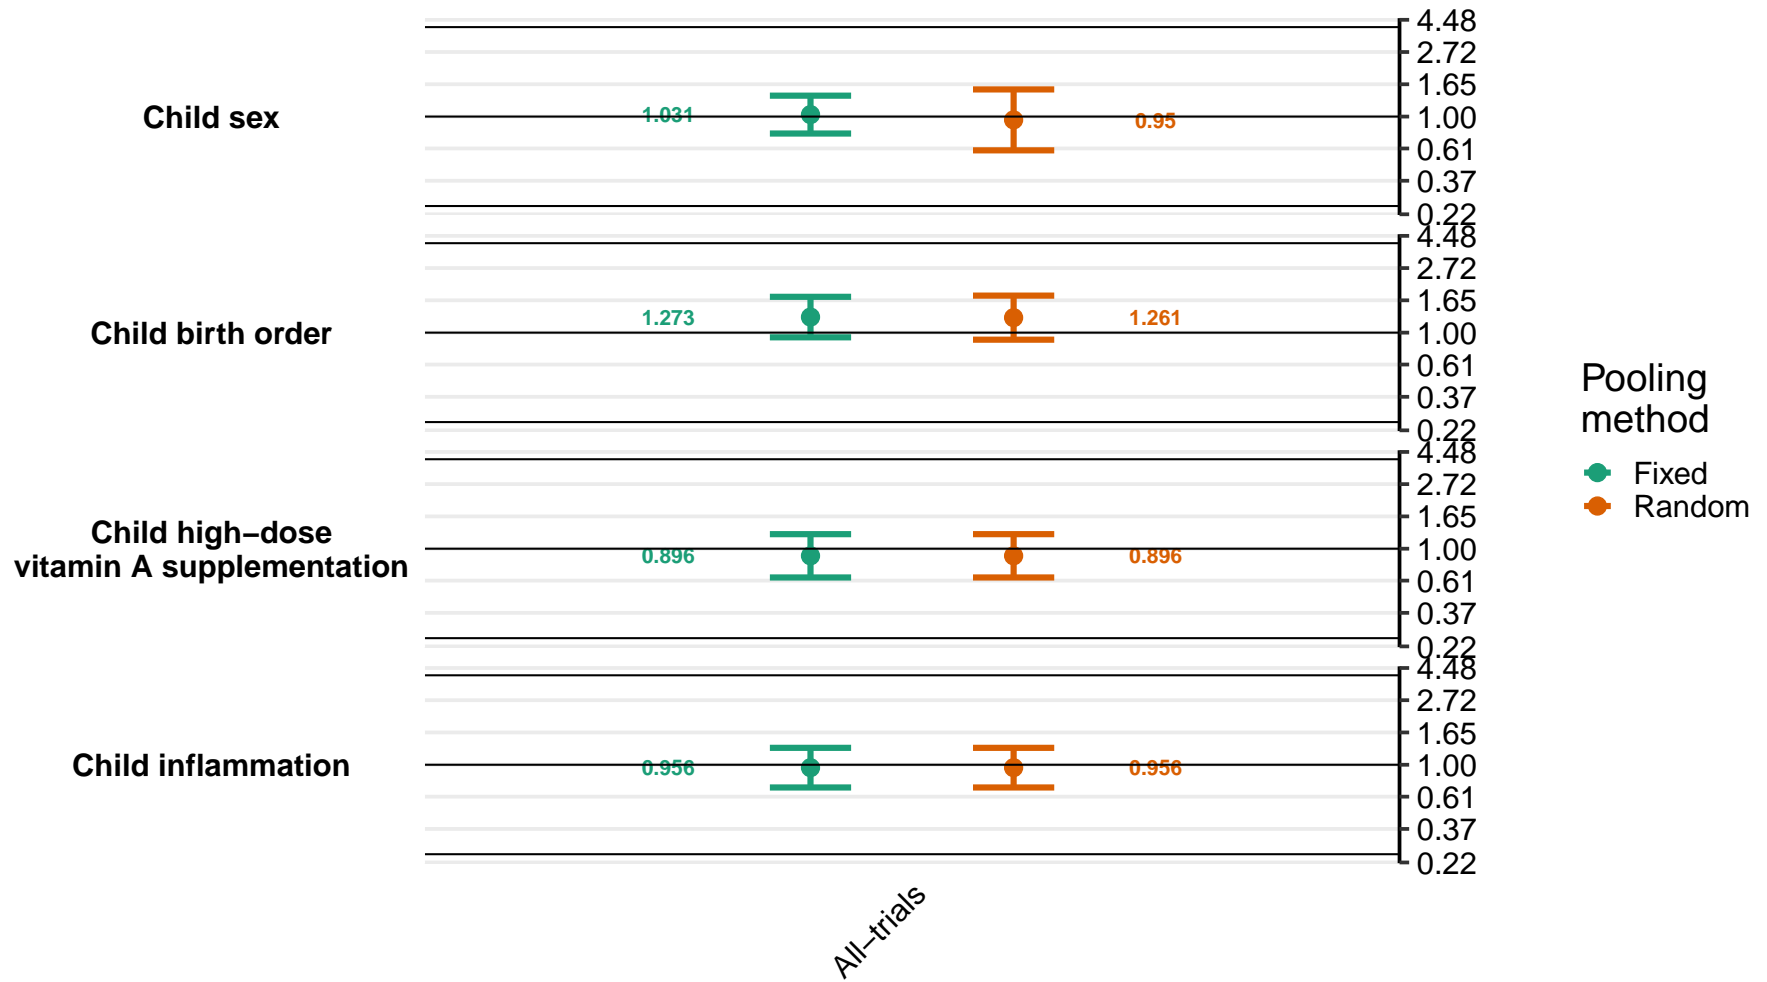

Supplemental figure 8U: Ratio of marginal vitamin A (retinol < 1.05 µmol/L) prevalence ratios

8U3: By household effect modifiers

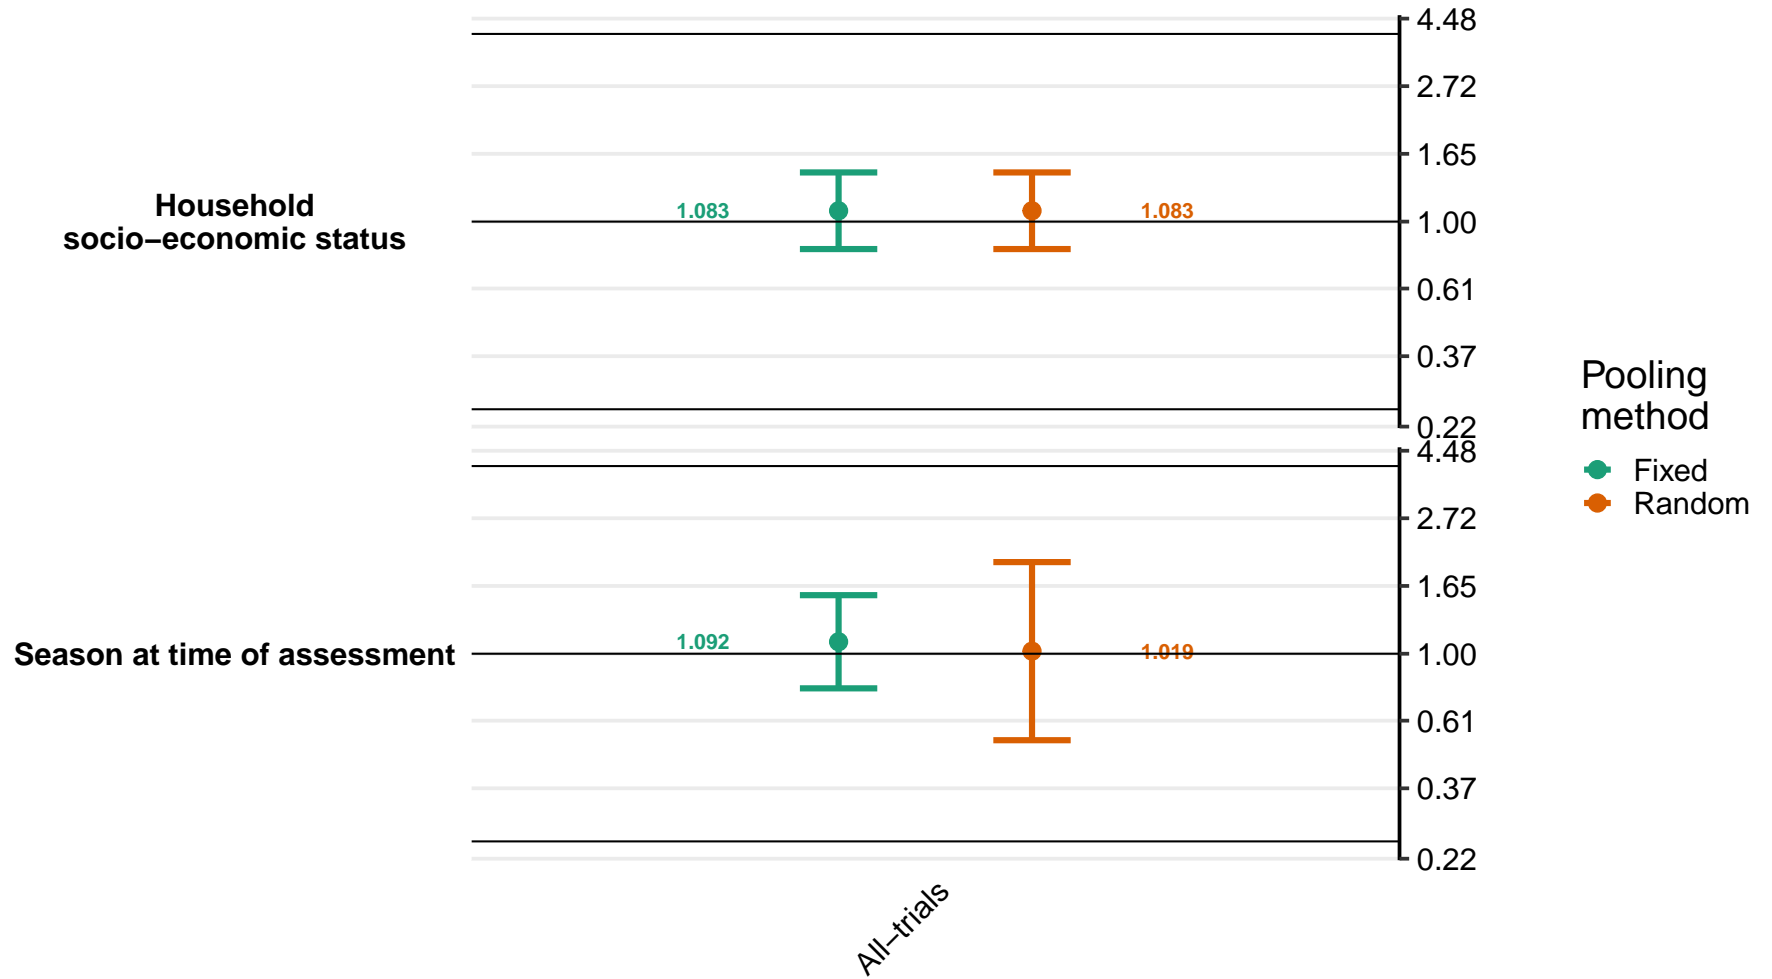

# Supplemental figure 8V: Difference in marginal vitamin A (retinol < 1.05 $\mu\text{mol/L}$ ) prevalence differences

8V1: By maternal effect modifiers

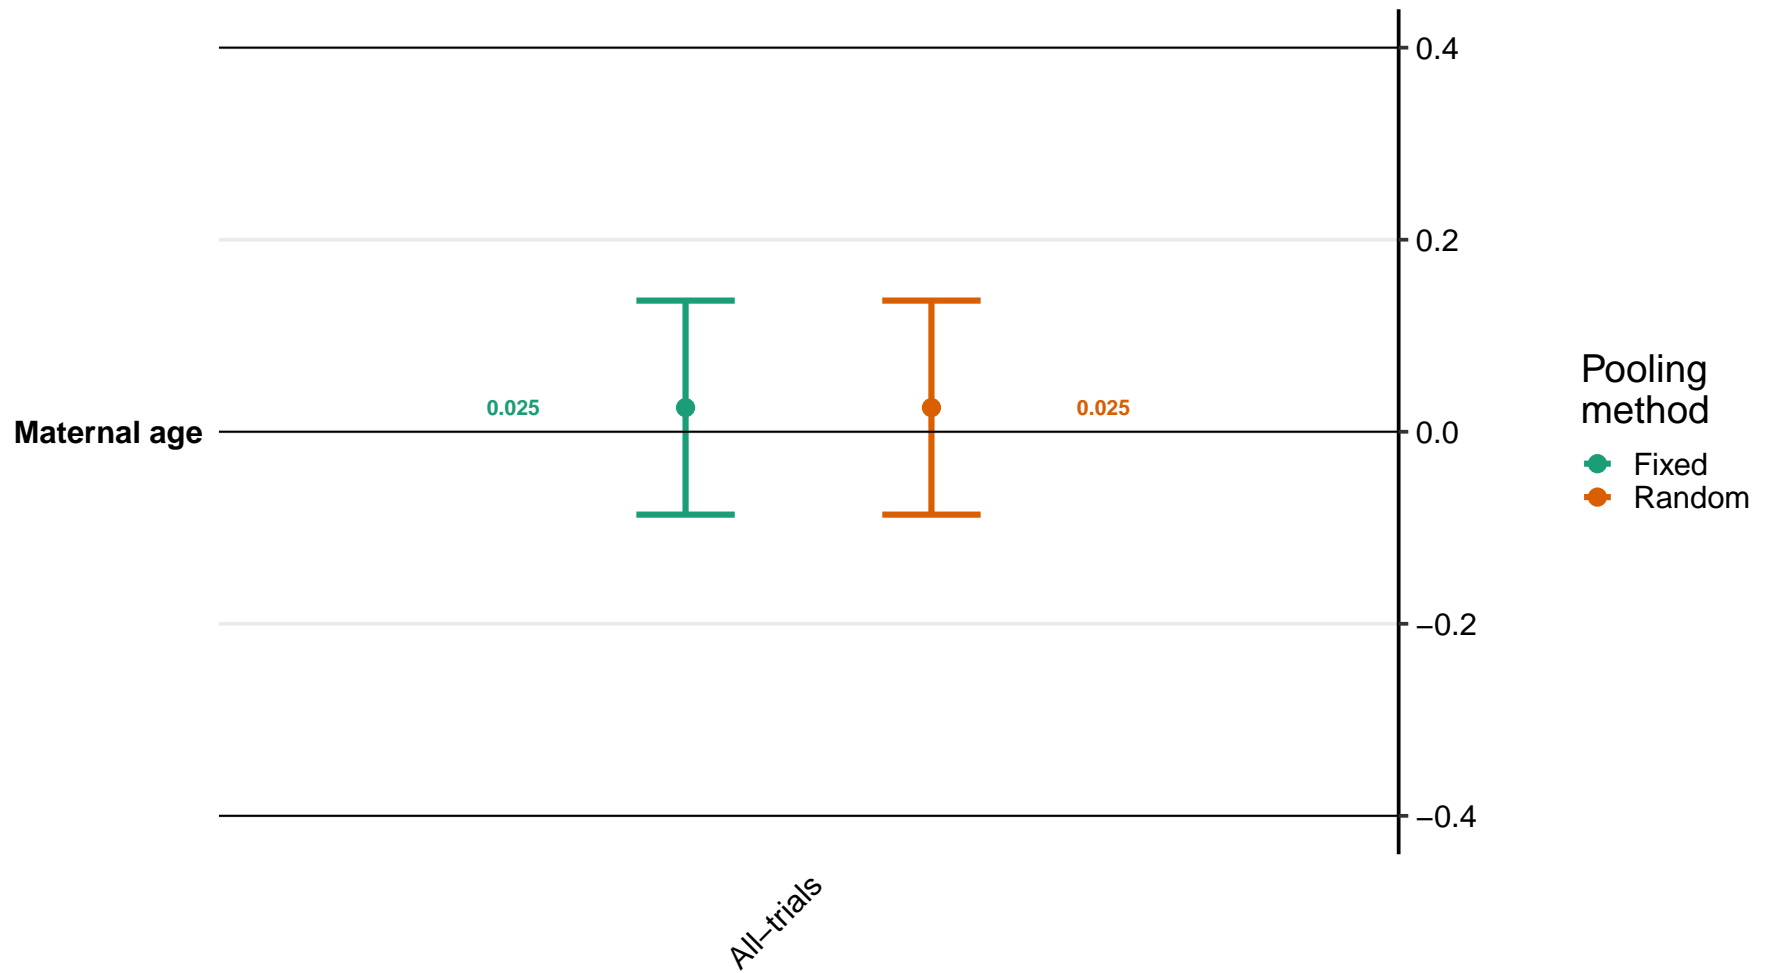

Supplemental figure 8V: Difference in marginal vitamin A (retinol < 1.05  $\mu\text{mol/L}$ ) prevalence differences

8V2: By child effect modifiers

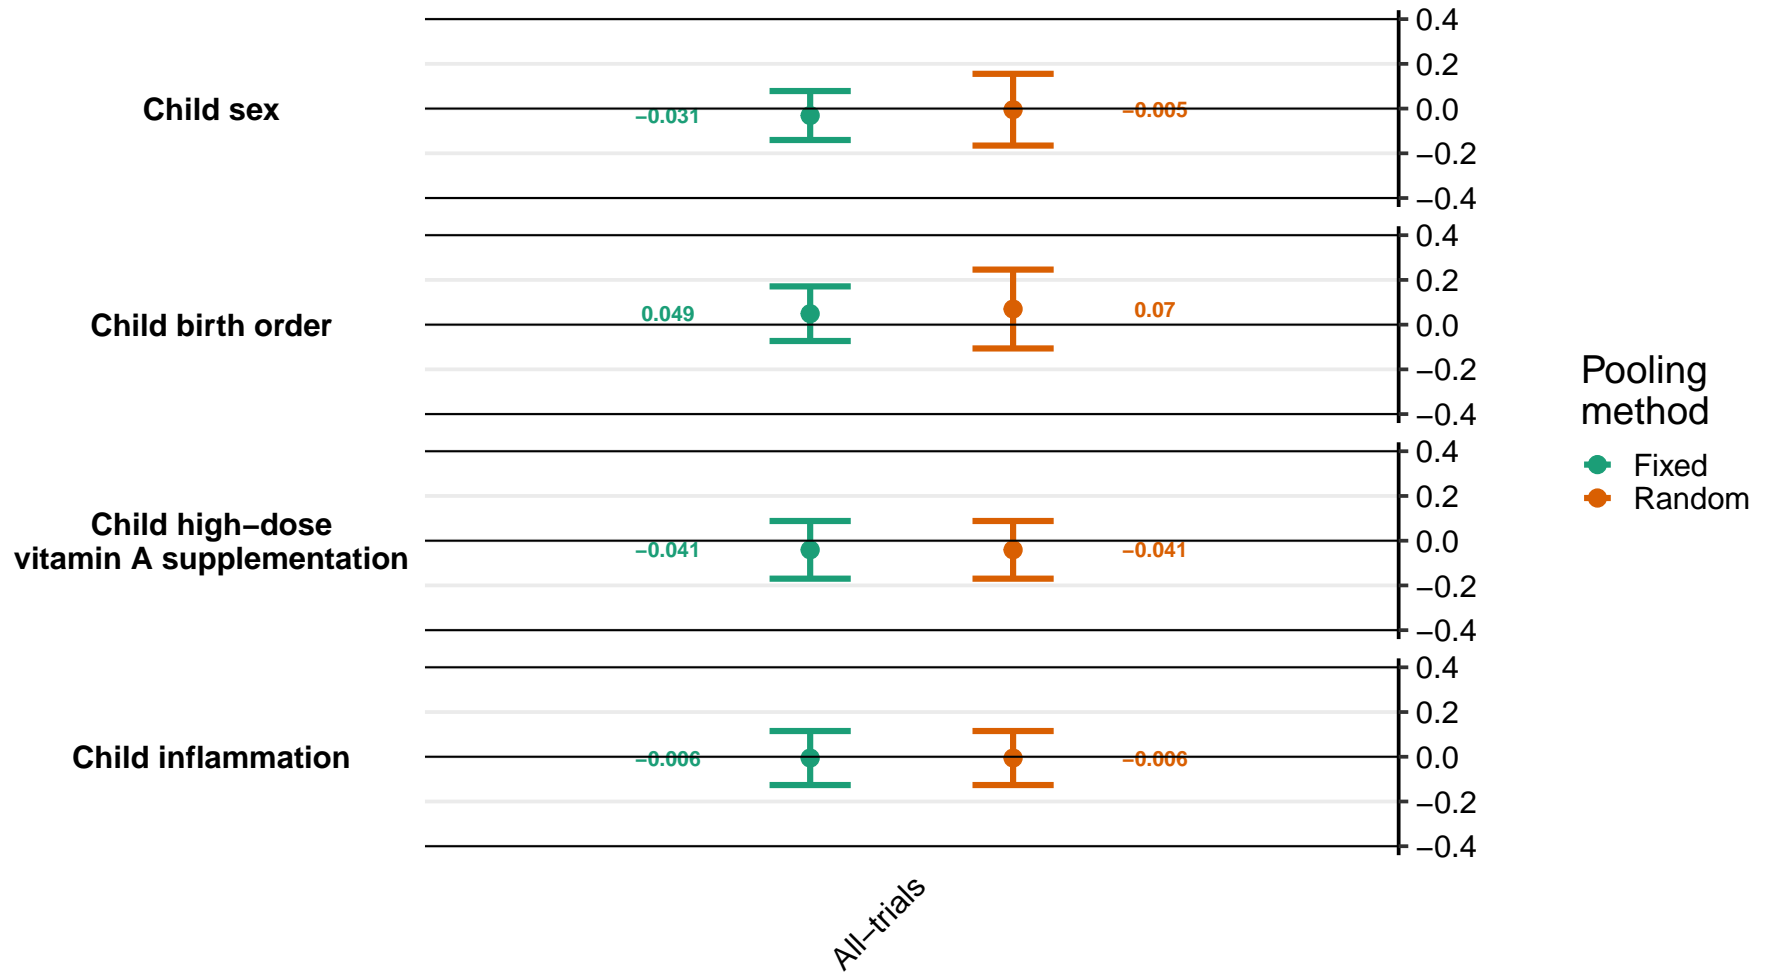



Supplemental figure 8V: Difference in marginal vitamin A (retinol < 1.05  $\mu\text{mol/L}$ ) prevalence differences

8V3: By household effect modifiers

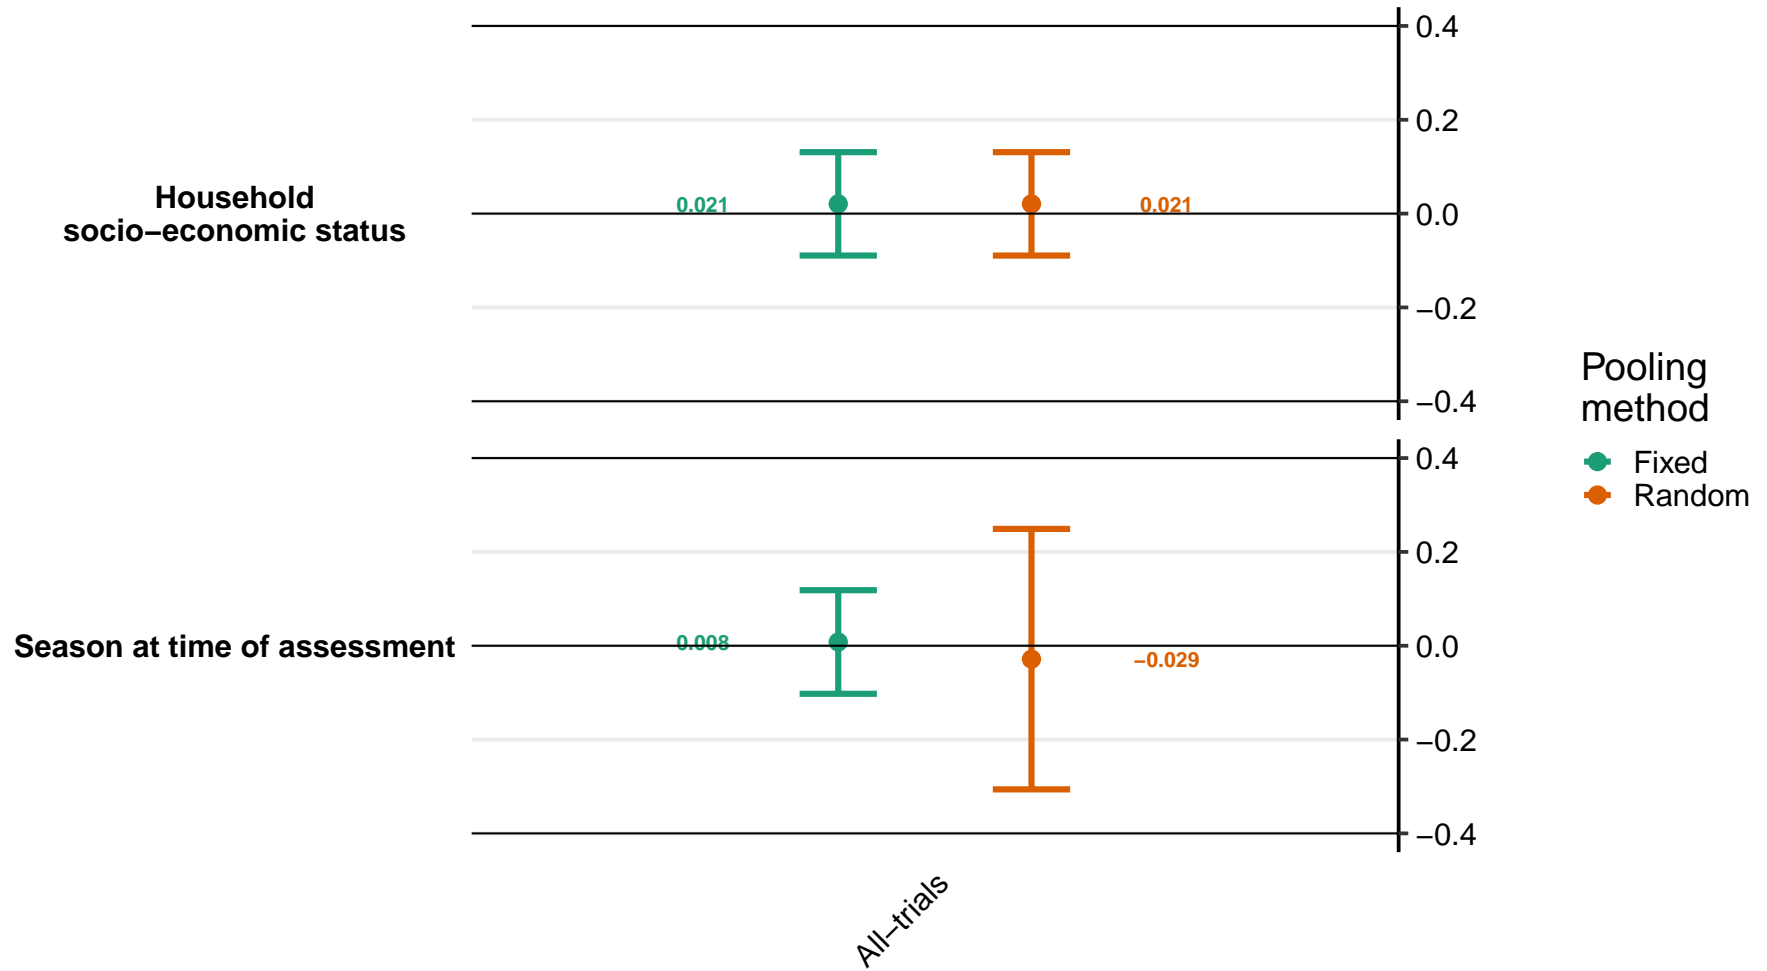

Supplemental figure 8W: Ratio of geometric mean ratio of retinol binding protein concentrations  
 8W1: By maternal effect modifiers

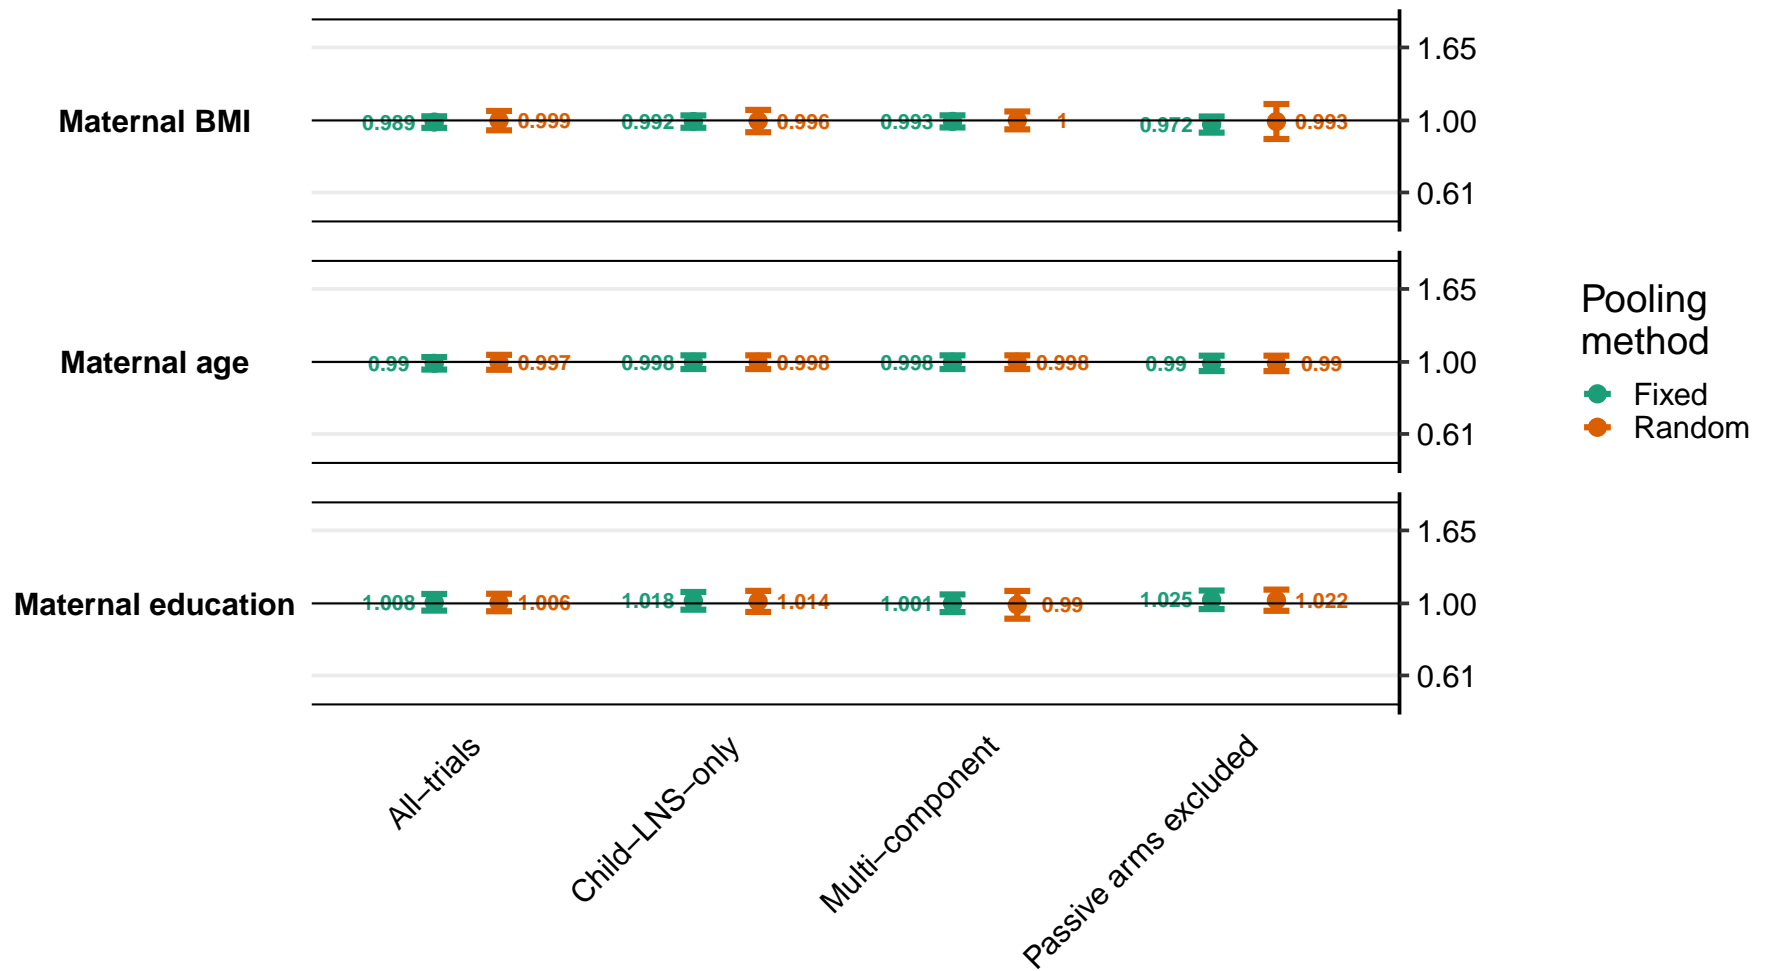

Supplemental figure 8W: Ratio of geometric mean ratio of retinol binding protein concentrations

8W2: By child effect modifiers

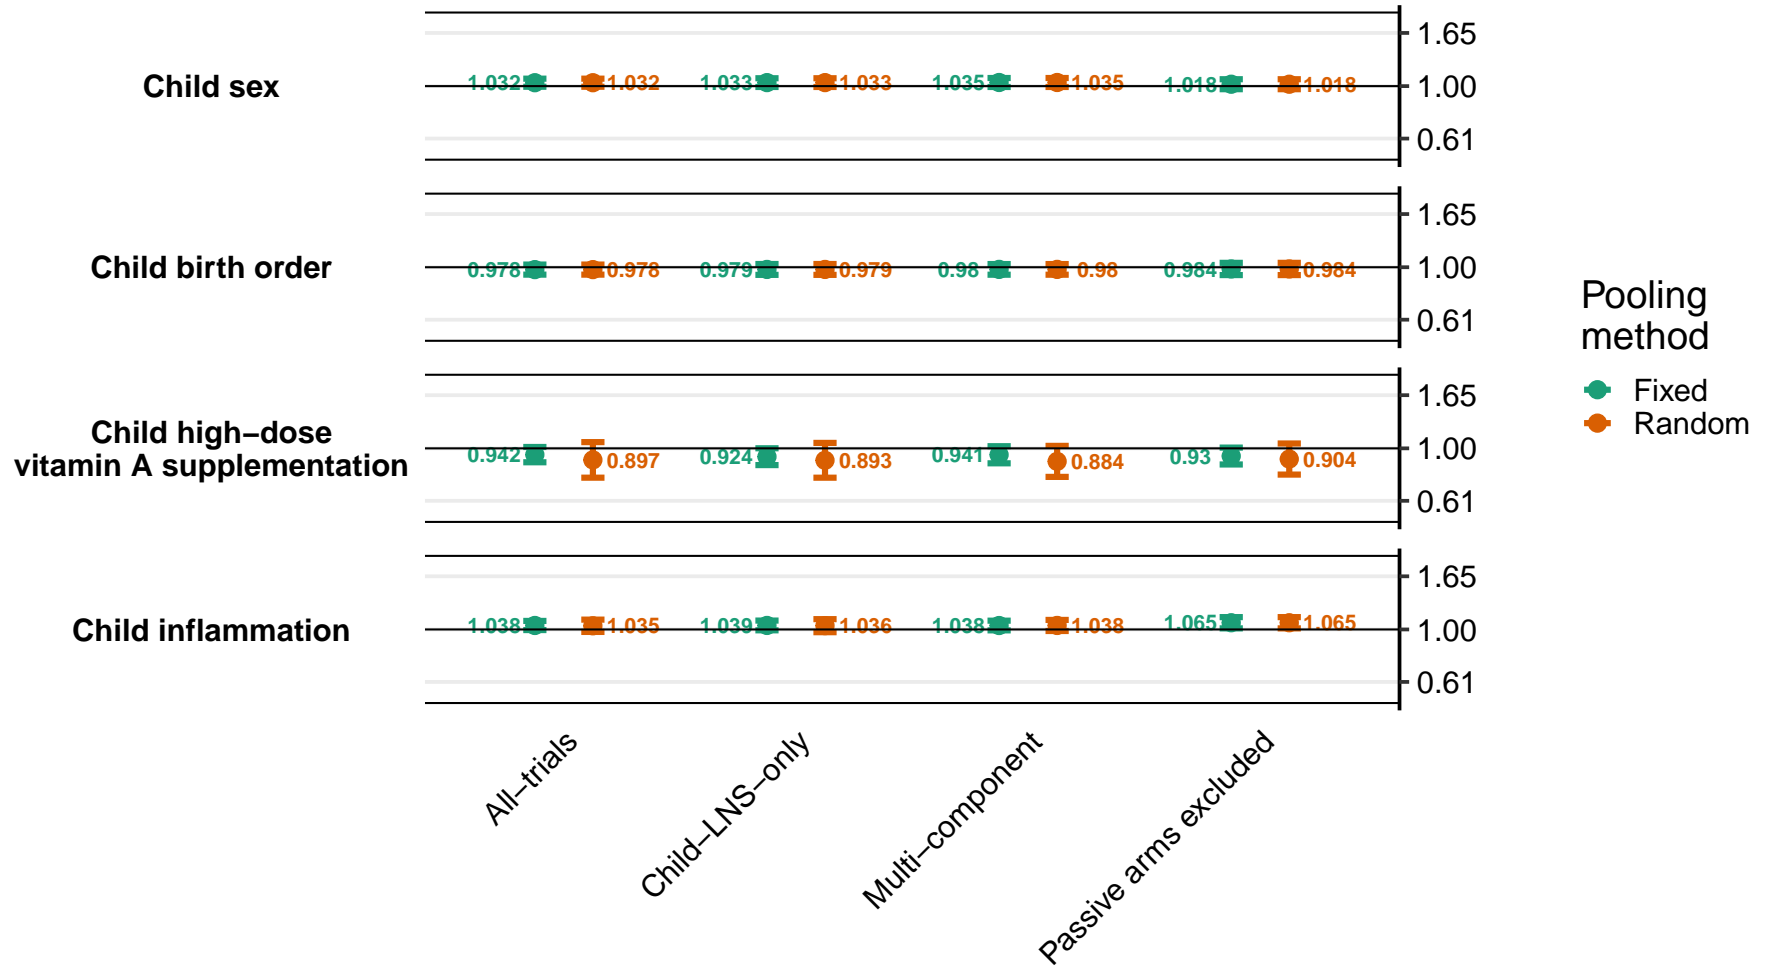

Supplemental figure 8W: Ratio of geometric mean ratio of retinol binding protein concentrations

8W3: By household effect modifiers

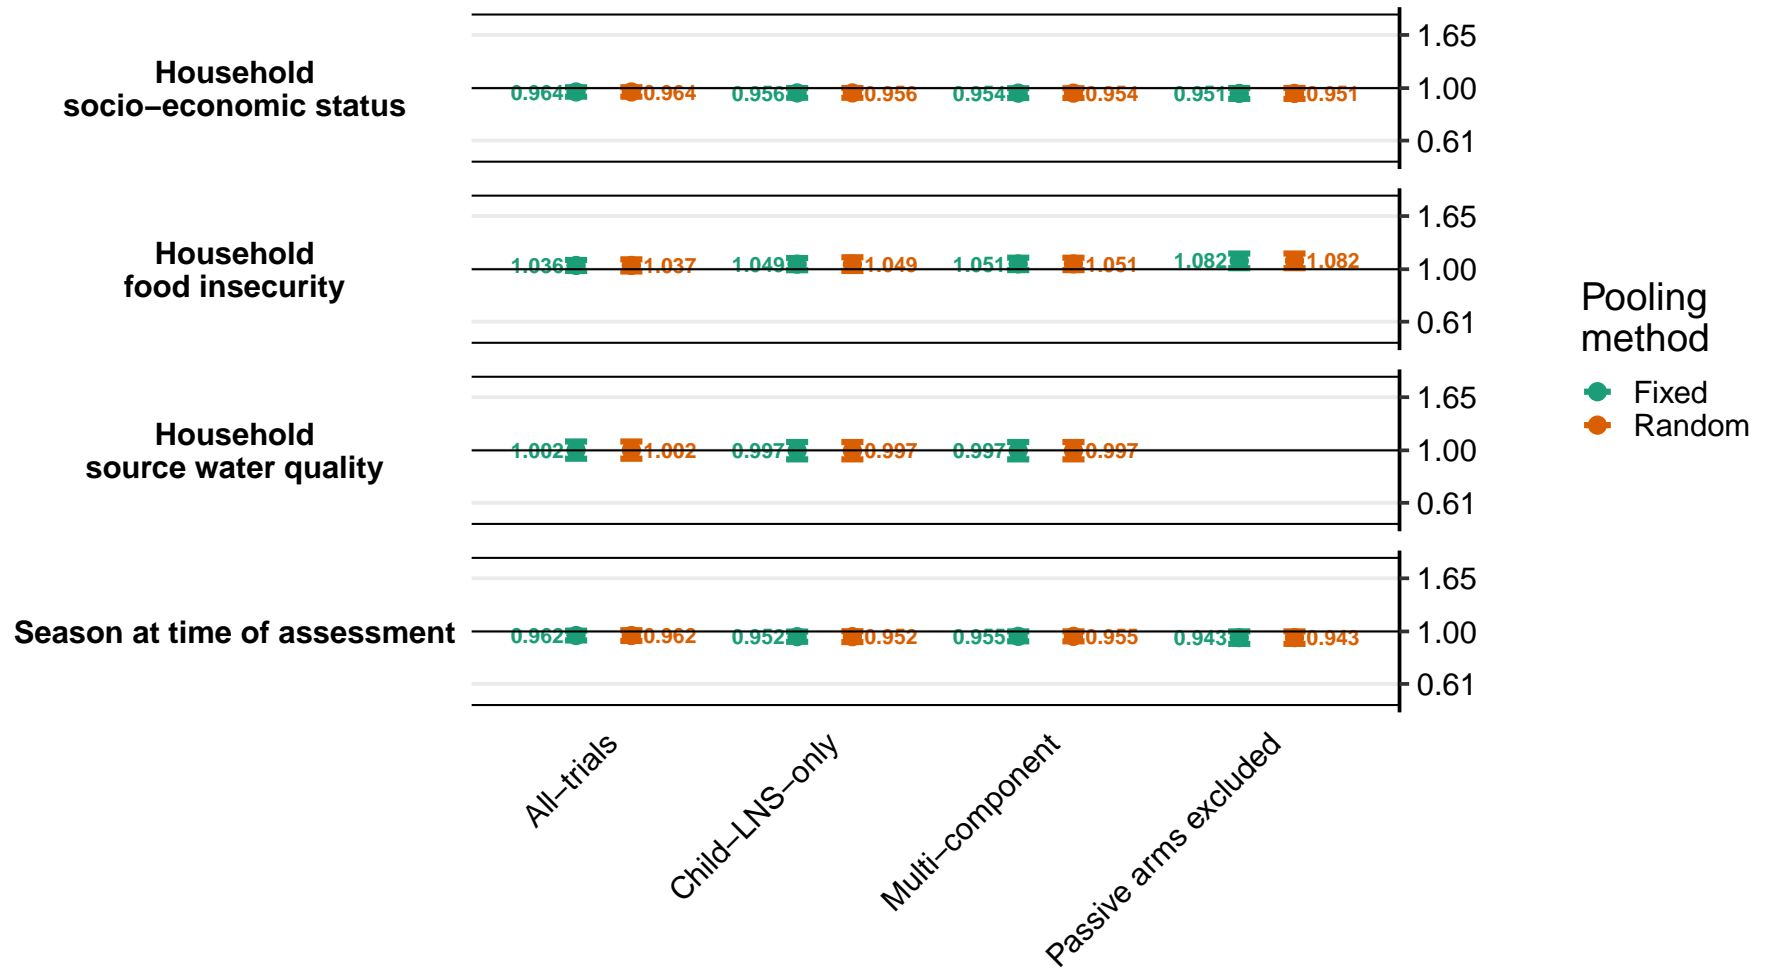

**Supplemental figure 8X: Ratio of Low vitamin A status (RBP < 0.70  $\mu\text{mol/L}$ ) prevalence ratios  
8X1: By maternal effect modifiers (insufficient comparisons)**

Supplemental figure 8X: Ratio of Low vitamin A status (RBP < 0.70  $\mu\text{mol/L}$ ) prevalence ratios

8X2: By child effect modifiers (insufficient comparisons)

Supplemental figure 8X: Ratio of Low vitamin A status (RBP < 0.70  $\mu\text{mol/L}$ ) prevalence ratios

8X3: By household effect modifiers (insufficient comparisons)

**Supplemental figure 8Y: Difference in low vitamin A status (RBP < 0.70  $\mu\text{mol/L}$ ) prevalence differences**

8Y1: By maternal effect modifiers (insufficient comparisons)



Supplemental figure 8Y: Difference in low vitamin A status (RBP < 0.70  $\mu\text{mol/L}$ ) prevalence differences

8Y2: By child effect modifiers (insufficient comparisons)

Supplemental figure 8Y: Difference in low vitamin A status (RBP < 0.70  $\mu\text{mol/L}$ ) prevalence differences

8Y3: By household effect modifiers (insufficient comparisons)

Supplemental figure 8Z: Ratio of marginal vitamin A status (RBP < 1.05  $\mu\text{mol/L}$ ) prevalence ratios

8Z1: By maternal effect modifiers

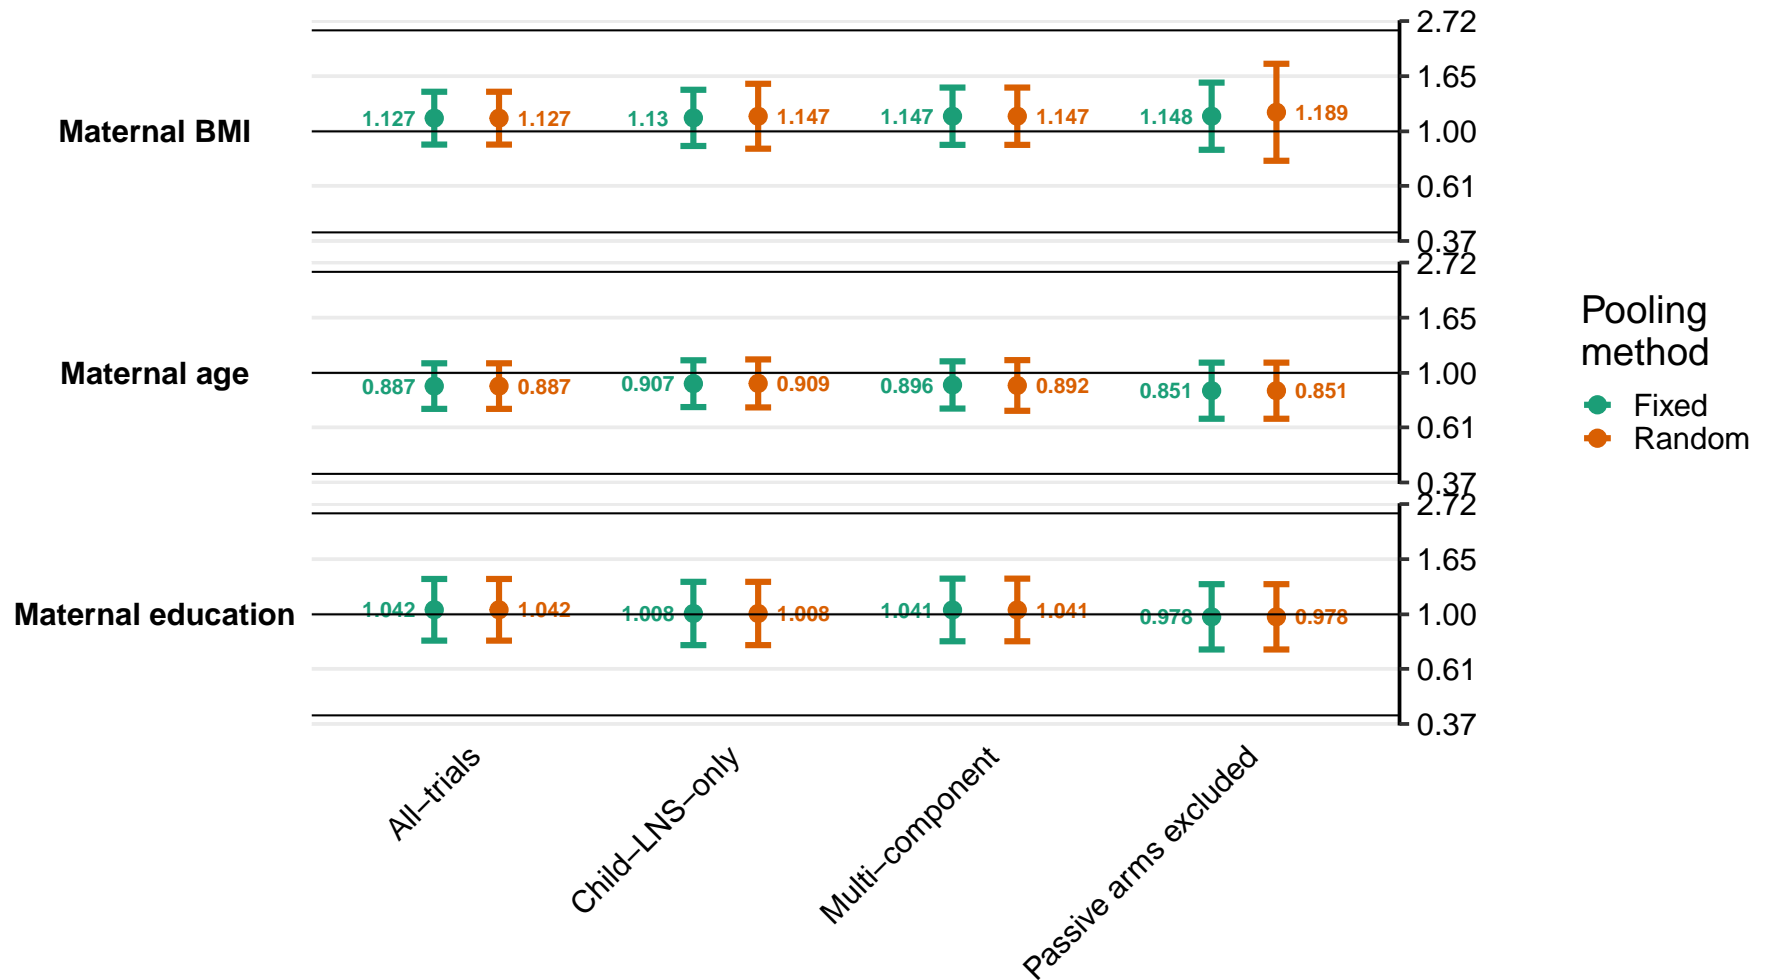

Supplemental figure 8Z: Ratio of marginal vitamin A status (RBP < 1.05  $\mu\text{mol/L}$ ) prevalence ratios

8Z2: By child effect modifiers

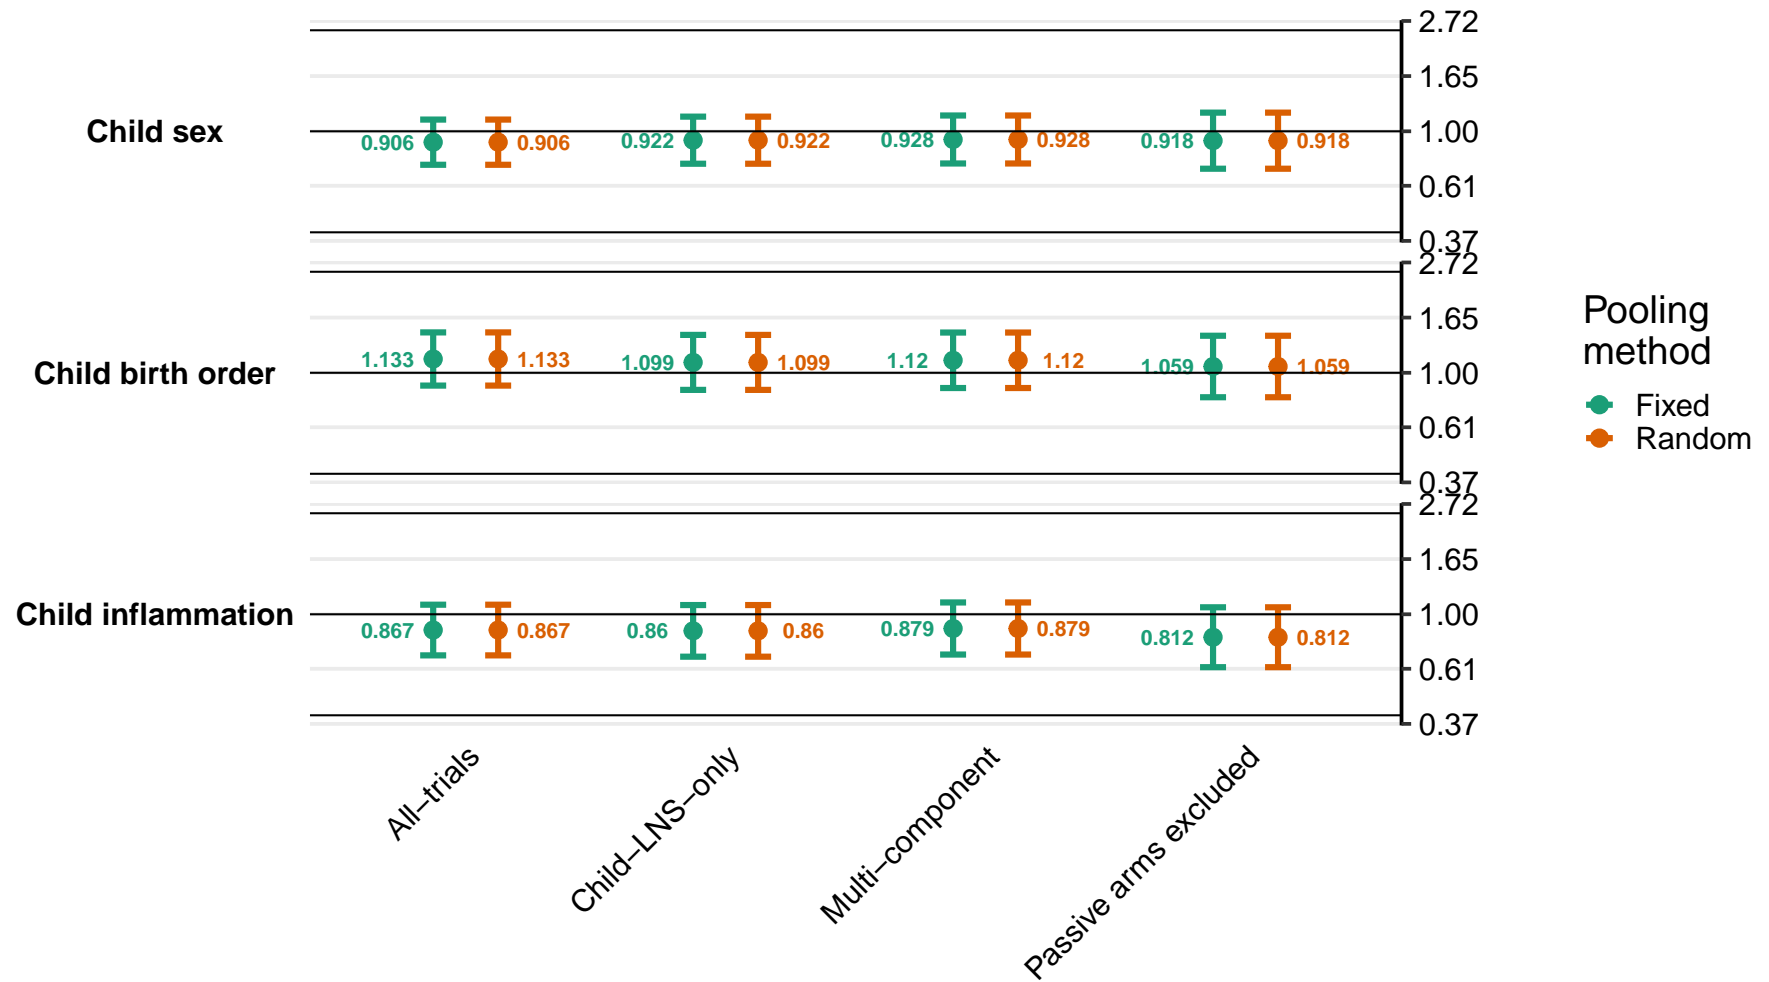

Supplemental figure 8Z: Ratio of marginal vitamin A status (RBP < 1.05  $\mu\text{mol/L}$ ) prevalence ratios

8Z3: By household effect modifiers

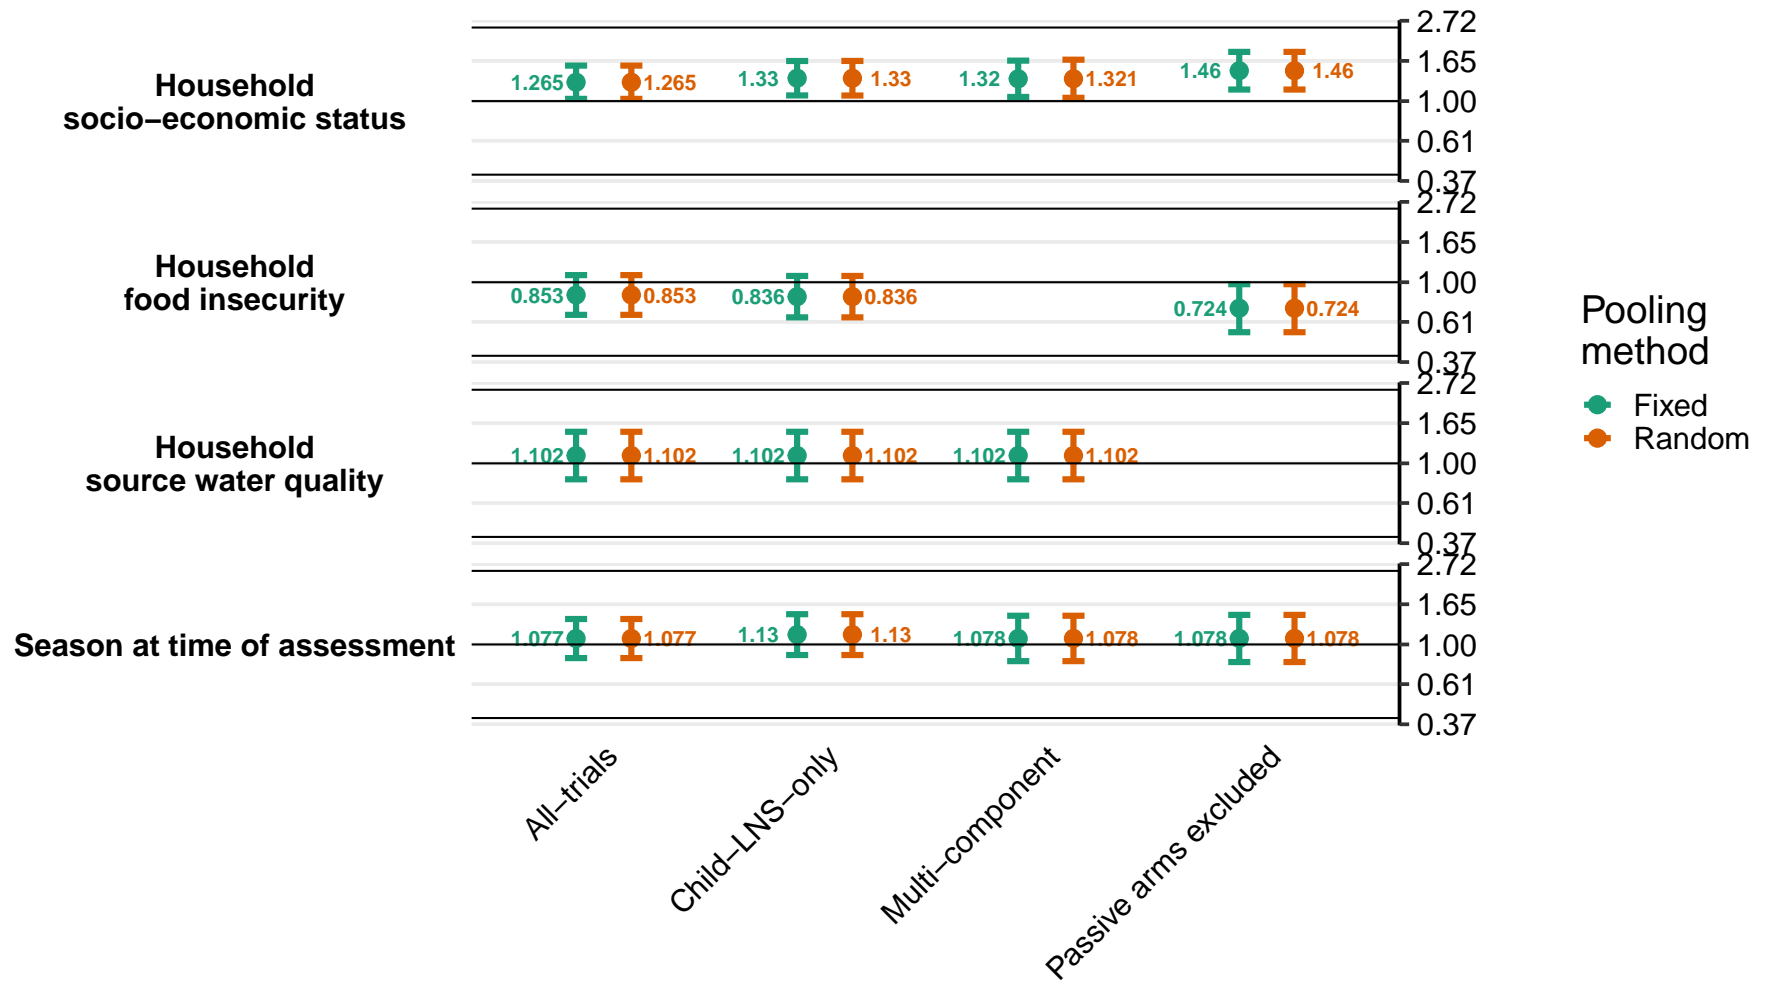

# Supplemental figure 8AA: Difference in marginal vitamin A status (RBP < 1.05 $\mu\text{mol/L}$ ) prevalence differences

8AA1: By maternal effect modifiers

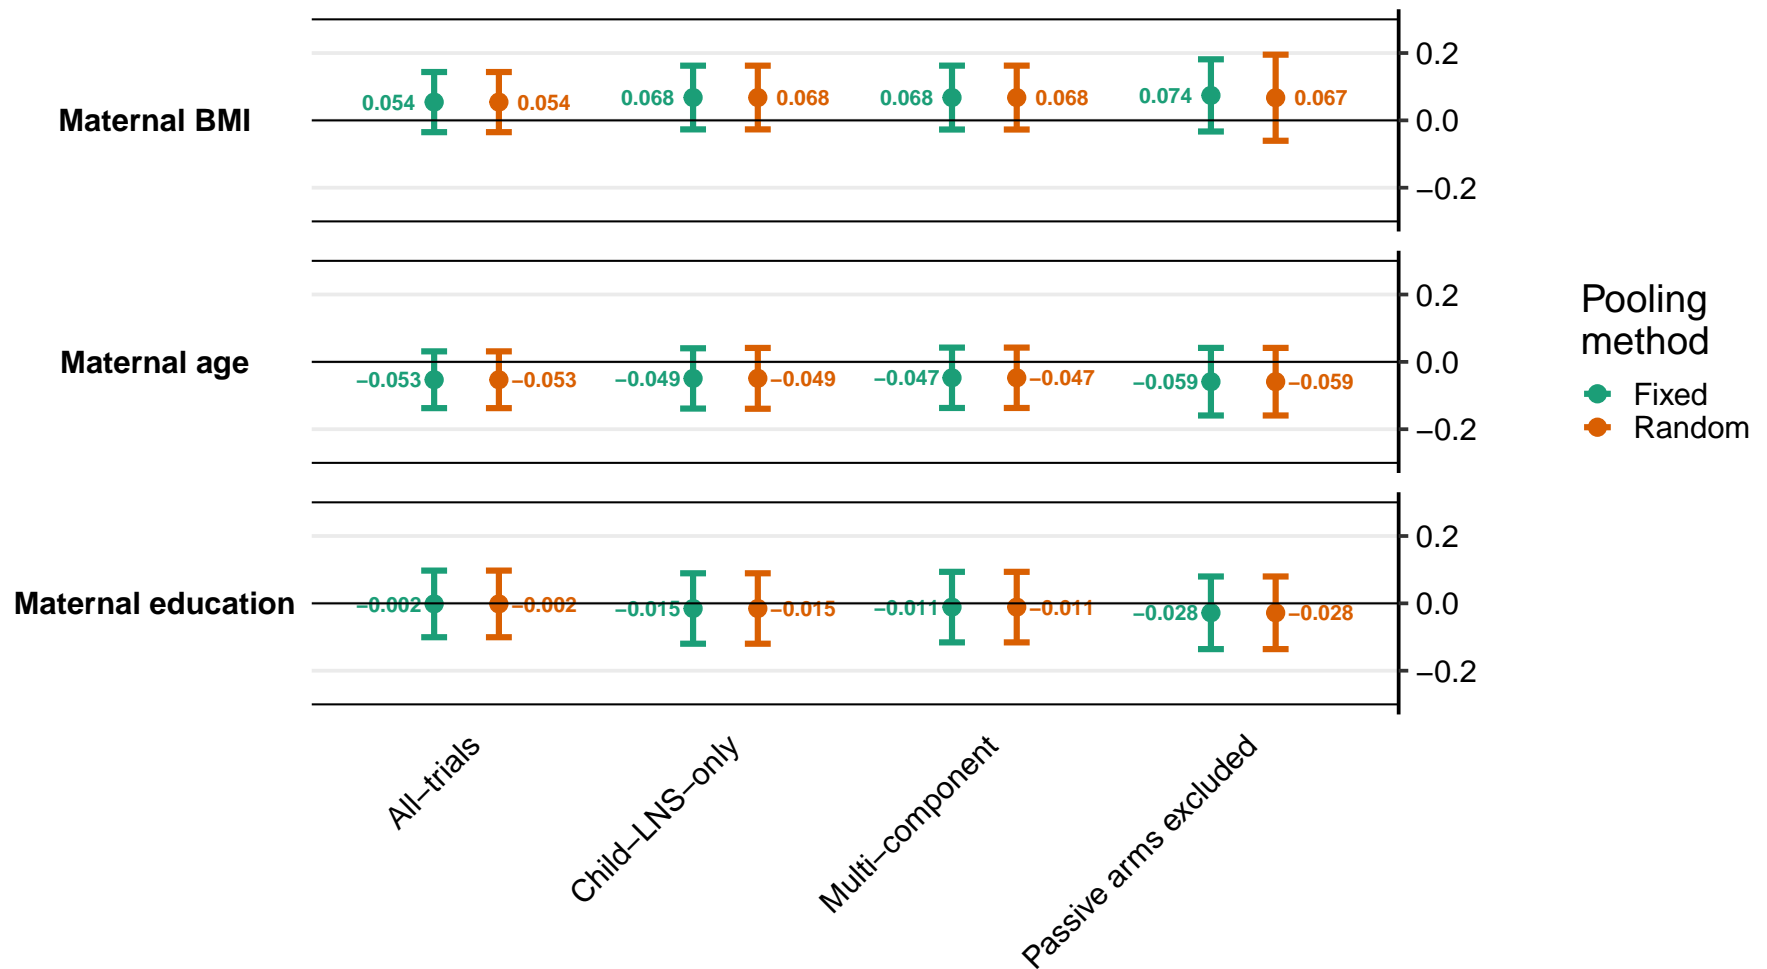

Supplemental figure 8AA: Difference in marginal vitamin A status (RBP < 1.05  $\mu\text{mol/L}$ ) prevalence differences

8AA2: By child effect modifiers

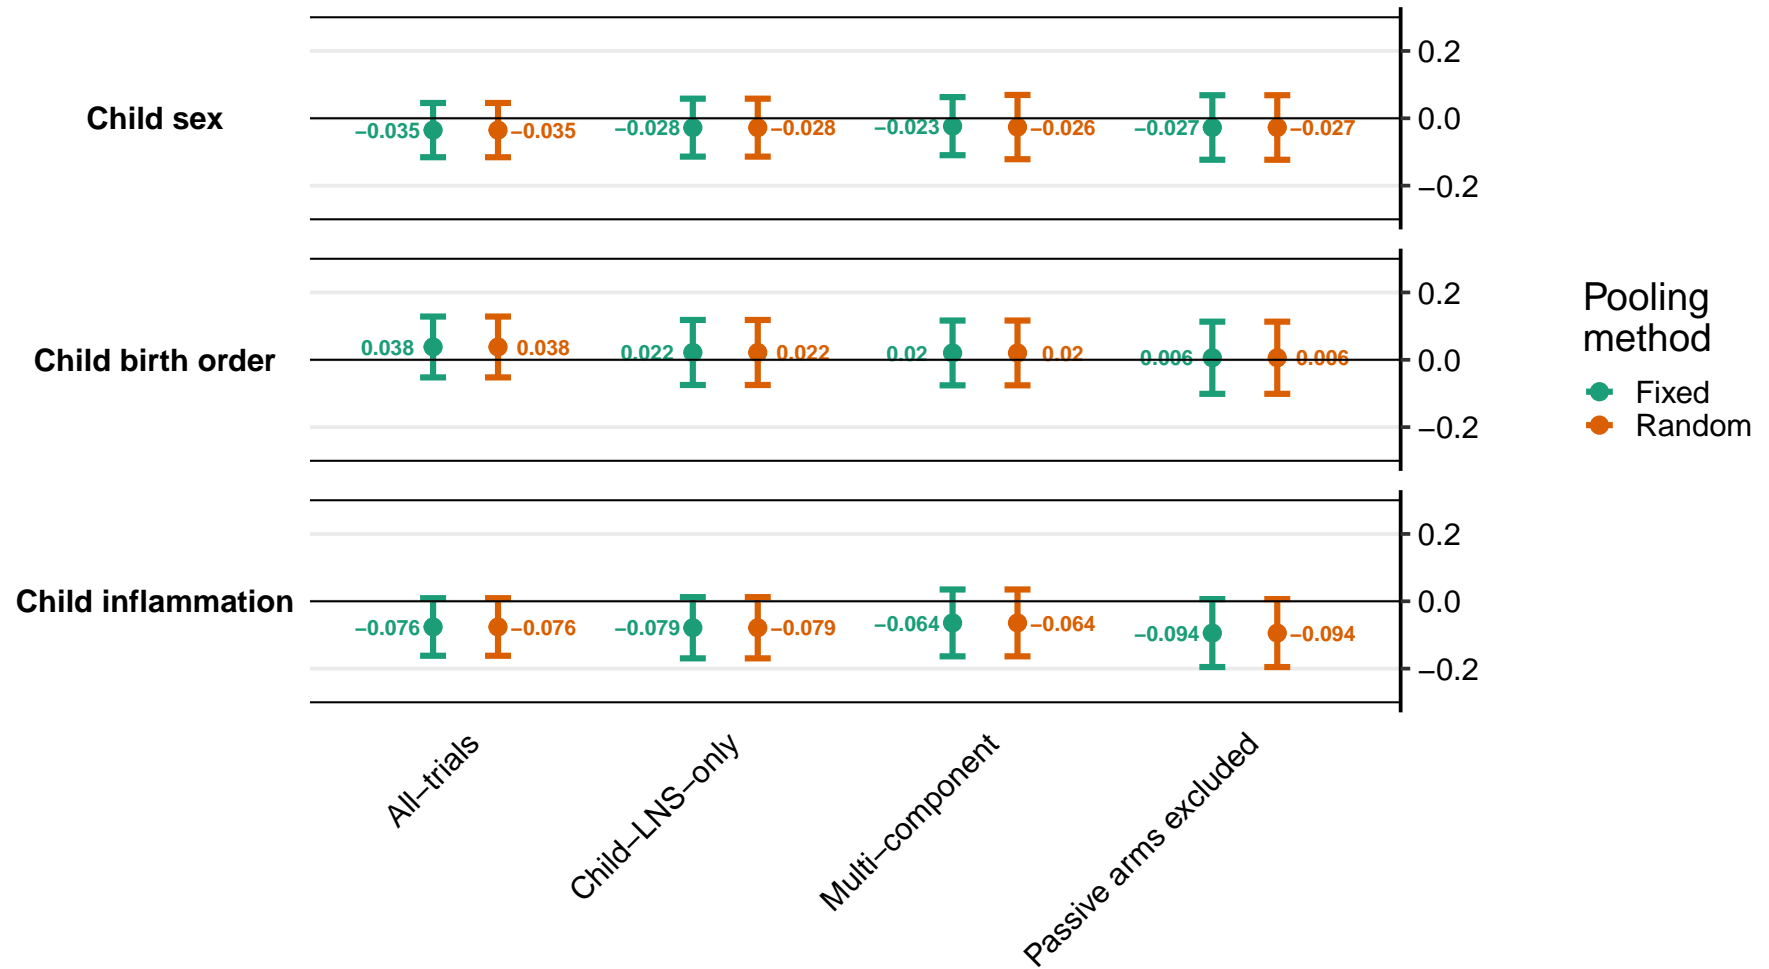

Supplemental figure 8AA: Difference in marginal vitamin A status (RBP < 1.05  $\mu\text{mol/L}$ ) prevalence differences

8AA3: By household effect modifiers

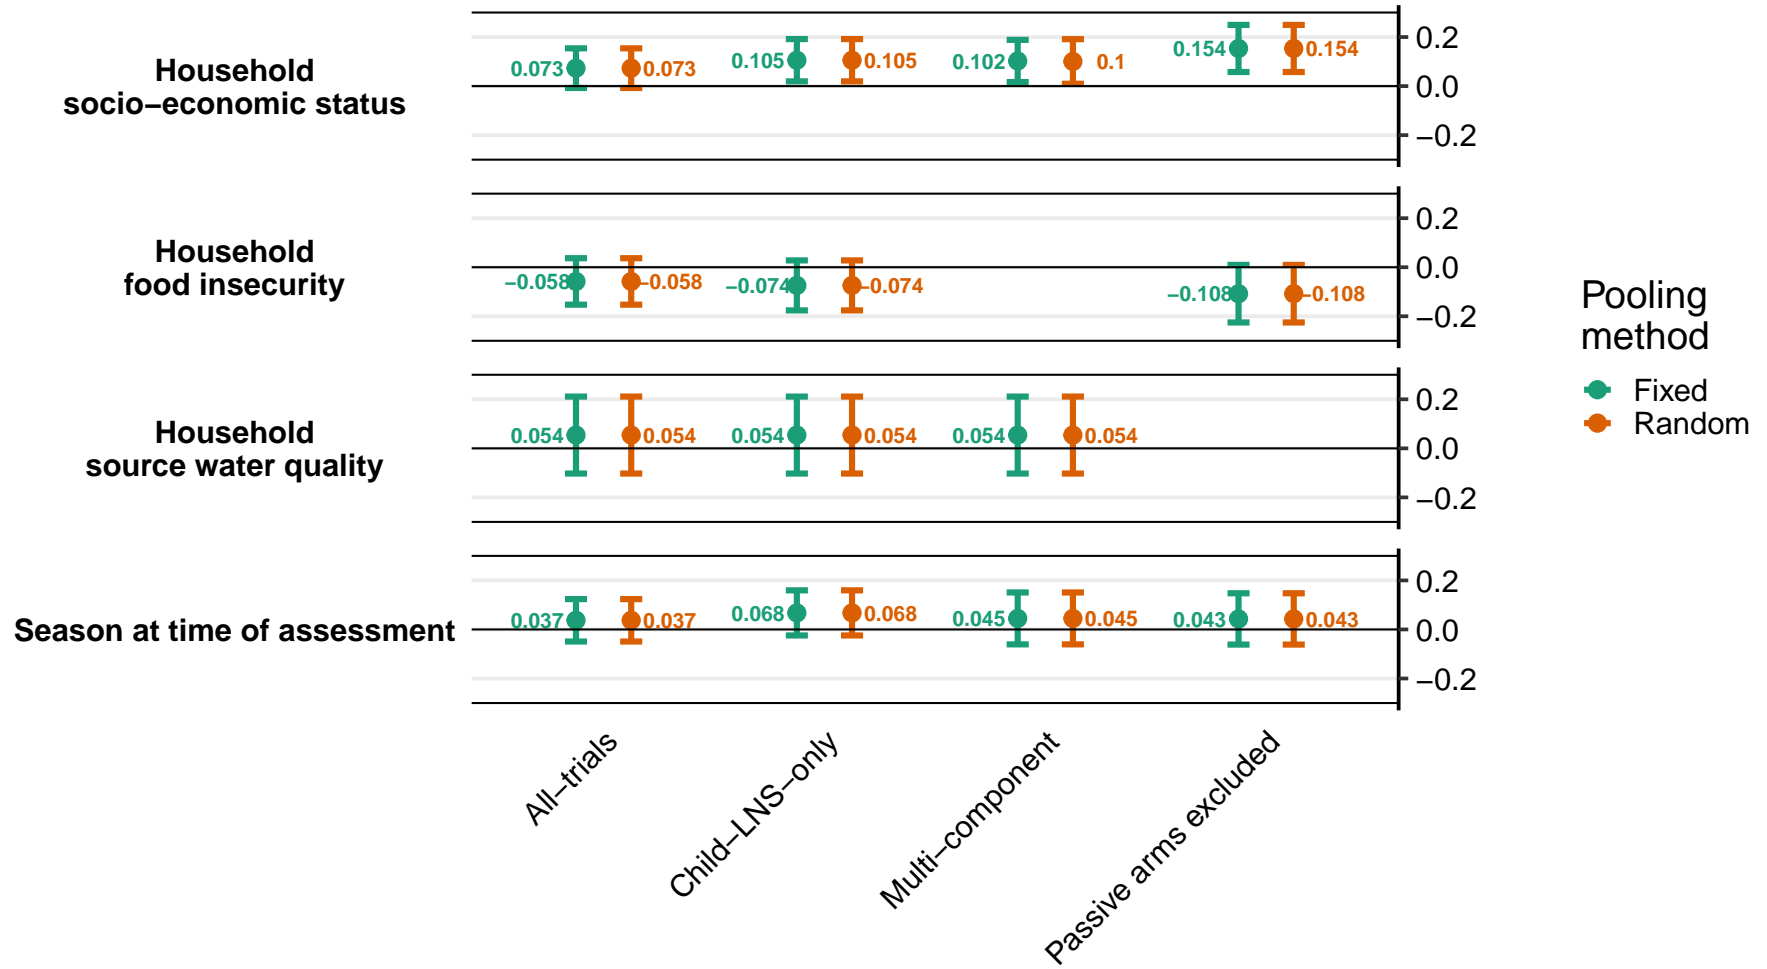

Supplement: Supplementary file [file media-5.pdf]
