# Supplementary material for: Characteristics that modify the effect of small-quantity lipid-based nutrient supplementation on child anemia and micronutrient status: an individual participant data meta-analysis of randomized controlled trials
Source: bioRxiv or medRxiv preprint supplement (doi:10.1101/2021.02.08.21251234), 2021-02-10
Supplement: Supplementary file [file media-4.pdf]

**Table 8. Supplemental overview of individual-level effect modification**

| Effect modifier                          | Plasma zinc | Retinol | Marginal retinol |    | RBP | Marginal RBP |     |
|------------------------------------------|-------------|---------|------------------|----|-----|--------------|-----|
|                                          | GMR         | GMR     | PR               | PD | GMR | PR           | PD  |
| Higher (vs. lower) maternal BMI          |             |         |                  |    |     |              |     |
| Older (vs. younger) mother               |             |         |                  |    |     |              |     |
| Higher (vs. lower) maternal education    |             |         |                  |    |     |              |     |
| Female (vs. male) child                  |             |         |                  |    |     |              |     |
| Later-born (vs. first-born) child        |             |         |                  |    |     |              |     |
| Acutely (vs. non-acutely) malnourished   |             |         |                  |    |     |              |     |
| Anemic (vs. non-anemic)                  |             |         |                  |    |     |              |     |
| Received (vs. did not receive) Vitamin A |             |         |                  |    |     |              |     |
| No high (vs. high) AGP or CRP            |             |         |                  |    |     |              | (C) |
| Higher (vs. lower) SES                   |             |         |                  |    |     |              |     |
| Food secure (vs. insecure)               |             |         |                  |    |     |              |     |
| Improved (vs. unimproved) water quality  |             |         |                  |    |     |              |     |
| Improved (vs. unimproved) sanitation     |             |         |                  |    |     |              |     |
| Rainy (vs. dry) season                   |             |         |                  |    |     |              |     |

MD=mean difference; GMR=geometric mean ratio; PR=prevalence ratio; PD=prevalence difference. Green indicates stronger effect in the indicated subgroup while blue indicates a stronger effect in the other subgroup. Dark color indicates  $p$ -for-interaction  $< 0.05$ ; light color indicates  $0.05 < p < 0.1$ . The letter "C" indicates that the apparent effect modification is due to the cutoff effect; when "C" is in parentheses, it is partially explained by the cutoff effect.
